# Supplementary material for: Disruption of TFIIH activities generates a stress gene expression response and reveals possible new targets against cancer
Source: Open Biol. 2020 Jun 17;10(6):200050. doi: 10.1098/rsob.200050 (PMC7333893; doi:10.1098/rsob.200050)
Supplement: Table S1 [file rsob200050supp2.xlsx]

## Sheet: Unique
gene_id	gene_name_a	NT1.vs.NTT3.x	NT1.vs.NTT4.x	NT2.vs.NTT3.x	NT2.vs_NTT4.x	T5_vs_TT7.x	T5_vs_TT8.x	T6_vs_TT7.x	T6_vs_TT8.x
NR_134983	NR_134983	0	0	0	0	1.08022	1.00875	1.86235	1.79088
NR_134867	NR_134867	-1.37576	-6.91886	-1.44685	-9.74147	1.37576	1.91886	1.44685	1.74147
NR_134612	NR_134612	-8.99152	-2.8216	-9.24317	-3.07325	0	0	0	0
NR_134563	NR_134563	2.18596	0.437093	0.0169731	1.73189	-11.3554	-2.36383	-10.0444	-1.05287
NR_134506	C9orf69	-1.73809	-1	-2.73809	-1	7.92481	8.43879	7.92481	8.43879
NR_133908	NR_133908	0	0	0	0	7.56986	7.74147	7.56986	7.74147
NR_131176	NR_131176	0	0	0	0	-2.82018	-2.00562	-1.11974	-1.30518
NM_138637	STEAP3	0	0	0	0	-1.75899	-7.04439	-1.89451	-7.17991
NM_001320755	NM_001320755	0	0	0	0	-2.00562	-1.2854	-2.00562	-1.2854
NM_001320654	NM_001320654	-1.56986	-1.16993	-1.56986	-1.16993	0	0	0	0
NM_001320570	NM_001320570	-7.81378	-1.16993	-8.65464	-2.01078	0	0	0	0
NM_001320445	NM_001320445	0	0	0	0	-1.98579	-2.35809	-2.00846	-2.38076
NM_001320241	NM_001320241	0	0	0	0	5.63421	6.53743	4.10369	5.00692
NM_001319214	NM_001319214	1.35885	2.65025	8.11374	9.40514	0	0	0	0
NM_001319184	RNPEP	1.00366	0.648077	0.420931	0.653478	0	0	0	0
NM_001319068	NM_001319068	0	0	0	0	-8.76818	-1.52026	-8.55459	-1.30666
NM_001318938	NM_001318938	0	0	0	0	1.3095	1.08101	1.87319	1.6447
NM_001318886	NM_001318886	10.9979	11.2009	1.80806	2.01107	0	0	0	0
NM_001318781	NM_001318781	0	0	0	0	-3.06095	-3.47599	-2.31849	-2.73353
NM_001318754	NM_001318754	7.76155	7.37504	7.76155	7.37504	0	0	0	0
NM_001318390	NM_001318390	-7.36632	-7.36632	-8.82337	-8.82337	0	0	0	0
NM_001318389	NM_001318389	-3.61054	-2.31694	-6.94618	-467000000000000	0	0	0	0
NM_001318387	NM_001318387	-1.24793	-10.5333	-2.17761	-11.463	0	0	0	0
NM_001318187	NM_001318187	-2.29956	-1.20819	-2.72078	-1.62941	0	0	0	0
NM_001317993	NM_001317993	0	0	0	0	-6.18982	-6.18982	-7.09803	-7.09803
NM_001317734	NM_001317734	9.01402	8.62936	9.01402	8.62936	0	0	0	0
NM_001317199	NM_001317199	2	3	4	1	-6.22882	-6.22882	-6.06609	-6.06609
NM_001317138	NM_001317138	2	2	2.64386	2.64386	-3.06609	-2.64386	-3.06609	-2.64386
NM_001317079	NM_001317079	0	0	0	0	-3.47573	-2.3837	-3.47573	-2.3837
NM_001316990	NM_001316990	0	0	0	0	-1.39938	-1.04428	-1.75648	-1.40139
NM_001316668	NM_001316668	0	0	0	0	-5.12928	-3.18982	-3.14218	-2.08164
NM_001311199	NM_001311199	0	0	0	0	-1.98299	-1.45121	-1.98299	-2.45121
NM_001310320	NM_001310320	7.31288	9.84235	7.31288	9.84235	0	0	0	0
NM_001308210	NM_001308210	0	0	0	0	-1.44345	-1.23045	-1.94996	-1.73697
NM_001308201	NM_001308201	0	0	0	0	-9.27845	-9.27845	-8.60733	-8.60733
NM_001308159	TGFA	6.33985	5.70044	6.33985	5.70044	-0.33985	-1.70044	-1.33985	-0.70044
NM_001308158	NM_001308158	8.10852	0	8.10852	0	-1.2854	-2.05528	-1.2854	-2.05528
NM_001308105	NM_001308105	0	0	0	0	-8.65464	-8.65464	-6.97728	-6.97728
NM_001306080	NM_001306080	-1.99465	-2.73161	-1.73376	-2.47072	0	0	0	0
101978785	PCAT14	0	0	0	0	1.55713	1.29597	1.52083	1.25967
101929372	LOC101929372	0	0	0	0	1.77507	1.96573	1.39603	1.5867
101926975	LOC101926975	0	0	0	0	1.90108	1.8847	1.12638	1.11
101669766	ZNF350-AS1	0	0	0	0	3.48049	3.07493	2.67314	2.26757
100996579	LOC100996579	0	0	0	0	2.08913	2.03493	1.6118	1.55761
100996511	LINC01355	0	0	0	0	2.43494	2.80735	1.63524	2.00765
100533107	RTEL1-TNFRSF6B	0	0	0	0	6.62936	6.62936	6.93074	6.93074
100268168	LOC100268168	0	0	0	0	1.60658	1.58042	1.1526	1.12644
100216545	KMT2E-AS1	0	0	0	0	2.81876	1.75489	2.81876	1.75489
647121	EMBP1	0	0	0	0	-1.0059	-2.12928	-1.09163	-2.21501
642846	LOC642846	0	0	0	0	-1.44795	-1.85561	-1.54749	-1.95515
642273	FAM110C	0	0	0	0	-3.3516	-3.63539	-3.10771	-3.3915
404217	CTXN1	-2.48922	-2.58707	-2.49133	-2.58917	0	0	0	0
399473	SPRED3	1.95567	1.59254	2.20359	1.84046	0	0	0	0
374918	IGFL1	-1.48841	-6.7258	-1.60837	-6.84576	0	0	0	0
374393	FAM111B	1.2864	1.12594	0.767935	0.60747	-1.67377	-1.63982	-1.52057	-1.48662
353091	RAET1G	-1.02157	-1.59124	-1.118	-1.68768	0	0	0	0
348793	WDR53	1.24603	1.02901	1.55673	1.33971	-1.24603	-1.02901	-1.55673	-1.33971
342667	STAC2	0.994557	0.926952	1.24437	1.17677	0	0	0	0
284802	FRG1B	0	0	0	0	1.18615	1.38282	1.38995	1.58662
284207	METRNL	-0.802015	-0.659057	-0.368833	-0.225875	1.94518	2.05316	1.83003	1.93802
221393	ADGRF4	-2.03953	-1.91667	-1.91754	-1.79468	2.03953	1.91667	1.91754	1.79468
202781	PAXIP1-AS1	0	0	0	0	1.85896	1.61298	2.01831	1.77233
163782	KANK4	-5.75489	-8.56224	-5.96743	-8.77479	0	0	0	0
163081	ZNF567	-0.0116191	-0.189342	-0.273181	-0.0954572	1.08668	1.0929	1.05397	1.06019
135250	RAET1E	-1.07903	-1.36138	-1.08458	-1.36693	0	0	0	0
128239	IQGAP3	2.42565	1.22987	2.65243	1.45664	0	0	0	0
121551	BTBD11	2.5118	2.52563	2.27812	2.29196	-1.5118	-1.52563	-1.27812	-1.29196
116496	FAM129A	0	0	0	0	1.49894	1.47738	1.3828	1.36124
115019	SLC26A9	0	0	0	0	3.49923	2.98606	4.61471	4.10154
112399	EGLN3	3.53172	3.95622	3.53172	3.95622	0	0	0	0
94234	FOXQ1	0	0	0	0	-2.00334	-1.79244	-2.16695	-1.95606
93323	HAUS8	0	0	0	0	-1.96578	-2.30757	-1.49586	-1.83764
92979	MARCH9	0	0	0	0	-1.22789	-1.42606	-1.41311	-1.61127
90865	IL33	0	0	0	0	-2.97046	-8.17991	-2.32193	-7.53138
89953	KLC4	1.35916	1.40795	1.4668	1.51559	0	0	0	0
85359	DGCR6L	1.2832	1.25447	1.14469	1.11596	0	0	0	0
84985	FAM83A	0	0	0	0	-2.16056	-1.93872	-2.00563	-1.78379
84552	PARD6G	-0.105182	0.193115	-0.303218	-0.00492108	1.12521	1.08985	1.06064	1.02528
84448	ABLIM2	0	0	0	0	-2.03883	-2.09786	-2.04974	-2.10877
84318	CCDC77	0	0	0	0	-2.76407	-1.89413	-2.90357	-2.03363
84159	ARID5B	1.54403	1.78557	1.08919	1.33073	-1.54403	-1.78557	-1.08919	-1.33073
83874	TBC1D10A	2.0163	1.70849	1.45781	1.15	0	0	0	0
83719	YPEL3	2.61906	2.48701	2.50928	2.37723	0	0	0	0
83648	FAM167A	-1.66496	-3.21245	-1.87101	-3.4185	0	0	0	0
80853	KDM7A	0	0	0	0	-1.81963	-1.31931	-1.67846	-1.17813
79946	C10orf95	0	0	0	0	1.78923	1.99649	1.03694	1.2442
79845	RNF122	0	0	0	0	1.65821	1.53398	1.80855	1.68431
79755	ZNF750	-3.926	-3.926	-4.08321	-4.08321	0	0	0	0
79629	OCEL1	1.49633	1.50558	1.45249	1.46174	0	0	0	0
79605	PGBD5	-1.95794	-2.74267	-1.96751	-2.75224	0	0	0	0
79600	TCTN1	1.56134	1.06686	1.59502	1.10055	0	0	0	0
79172	CENPO	0	0	0	0	-1.12455	-1.04854	-1.10379	-1.02778
79170	PRR15L	-3.19265	-4.75899	-3.24497	-4.81131	0	0	0	0
79098	C1orf116	-1.39165	-3.01094	-1.67624	-3.29553	0	0	0	0
65983	GRAMD3	-2.07181	-2.37239	-2.13042	-2.431	0	0	0	0
64092	SAMSN1	0	0	0	0	-2.383	-2.50499	-2.46533	-2.58732
59342	SCPEP1	1.0878	1.20163	1.01419	1.12802	0	0	0	0
57822	GRHL3	-4.63061	-7.17493	-4.62783	-7.17215	0	0	0	0
57549	IGSF9	-3.99765	-5.71385	-3.82958	-5.54579	0	0	0	0
57530	CGN	-2.84938	-4.0635	-3.25576	-4.46989	0	0	0	0
57332	CBX8	0	0	0	0	-1.72541	-1.92439	-1.4554	-1.65438
57122	NUP107	0	0	0	0	-1.16245	-1.15409	-1.13024	-1.12188
56963	RGMA	-2.55639	-6.96578	-2.43923	-6.84862	0	0	0	0
56924	PAK6	-2.44018	-3.16716	-2.45396	-3.18094	0	0	0	0
56034	PDGFC	0	0	0	0	-1.60498	-1.48884	-1.88074	-1.7646
55835	CENPJ	0	0	0	0	-1.46211	-1.55325	-1.17971	-1.27085
55561	CDC42BPG	2.21564	1.67427	2.26362	1.72225	0	0	0	0
55346	TCP11L1	0	0	0	0	-1.98658	-1.69707	-1.59679	-1.30728
55057	AIM1L	-3.98185	-3.98185	-3.88753	-3.88753	0	0	0	0
54946	SLC41A3	1.00594	1.05191	1.20349	1.24945	0	0	0	0
54930	HAUS4	1.01714	1.32116	1.09994	1.40396	0	0	0	0
54544	CRCT1	-5.01266	-5.01266	-4.60638	-4.60638	0	0	0	0
54101	RIPK4	-1.8771	-1.69995	-2.31466	-2.1375	0	0	0	0
51734	MSRB1	0	0	0	0	-2.37493	-1.94369	-2.2727	-1.84146
51659	GINS2	0	0	0	0	-2.00426	-2.7047	-2.02748	-2.72792
51523	CXXC5	6.26679	6.26679	6.16993	6.16993	-6.26679	-6.26679	-6.16993	-6.16993
51421	AMOTL2	-1.39381	-2.03368	-1.6679	-2.30778	0	0	0	0
51099	ABHD5	1.54573	1.97659	1.48046	1.91132	0	0	0	0
29887	SNX10	0	0	0	0	-4.1412	-1.62779	-4.46787	-1.95446
27076	LYPD3	1.77901	1.39739	2.0842	1.70257	-1.77901	-1.39739	-2.0842	-1.70257
26232	FBXO2	1.01755	1.37962	1.19403	1.5561	0	0	0	0
26050	SLITRK5	1.22239	1.08107	0.930737	1.37273	-2.30666	-2.19704	-1.83954	-1.72991
25816	TNFAIP8	0	0	0	0	-1.20727	-1.0136	-1.26043	-1.06675
25805	BAMBI	2.34354	2.29841	2.20993	2.1648	-1.34354	-1.29841	-1.20993	-2.1648
23580	CDC42EP4	0	0	0	0	-1.8356	-1.7653	-1.88044	-1.81015
23327	NEDD4L	2.26527	1.93457	2.2973	1.9666	0	0	0	0
23286	WWC1	0	0	0	0	-1.81243	-1.78668	-1.57998	-1.55423
22943	DKK1	-8.47224	-8.47224	-8.80213	-8.80213	0	0	0	0
11209	MST1P2	1.14018	1.38904	1.91359	2.16245	0	0	0	0
10979	FERMT2	1.15219	1.05132	1.11001	1.00914	0	0	0	0
10501	SEMA6B	0	0	0	0	-1.603	-1.80735	-1.41163	-1.61599
10293	TRAIP	3.42786	3.22973	2.5164	2.31827	-1.42786	-1.22973	-1.5164	-1.31827
10158	PDZK1IP1	1.02723	1.40432	1.25934	1.63643	0	0	0	0
9982	FGFBP1	-3.39357	-5.29879	-3.03237	-4.93759	0	0	0	0
9945	GFPT2	3.65896	3.90102	3	3.24205	0	0	0	0
9761	MLEC	0	0	0	0	1.21564	1.28265	1.40175	1.46876
9651	PLCH2	1.25376	1.50343	1.1917	1.44137	0	0	0	0
9537	TP53I11	-1.07664	-1.62686	-1.08436	-3.78787	0	0	0	0
9507	ADAMTS4	0	0	0	0	1.28761	1.30355	1.8251	1.84104
9456	HOMER1	1.51778	1.95666	1.30866	1.74753	0	0	0	0
9173	IL1RL1	0	0	0	0	1.18165	1.17886	1.18132	1.17853
9119	KRT75	-4.02772	-6.07834	-4.16161	-6.21224	0	0	0	0
9076	CLDN1	-2.19257	-3.55698	-2.45565	-3.82006	0	0	0	0
8971	H1FX	1.05363	1.00518	1.26996	1.22151	0	0	0	0
8771	TNFRSF6B	0	0	0	0	1.09268	1.02331	1.1115	1.04213
8740	TNFSF14	2.21201	2.94012	2.54774	3.27584	0	0	0	0
8717	TRADD	0	0	0	0	-1.48654	-1.51802	-1.64593	-1.67741
8702	B4GALT4	-1.54968	-2.2235	-1.5733	-2.24711	0	0	0	0
8406	SRPX	1.27671	1.49076	1.1766	1.39066	0	0	0	0
7805	LAPTM5	1.83403	1.36358	1.63921	1.16875	0	0	0	0
7576	ZNF28	0	0	0	0	1.27024	1.57461	1.54946	1.85383
7424	VEGFC	0	0	0	0	-1.17222	-1.21425	-1.26131	-1.30333
7357	UGCG	0	0	0	0	-2.24194	-1.72589	-2.25036	-1.73432
7272	TTK	0	0	0	0	-2.94571	-1.6909	-2.8625	-1.60768
7057	THBS1	-2.52614	-2.73278	-3.39266	-3.59929	0	0	0	0
6790	AURKA	0	0	0	0	-1.6131	-1.33647	-1.96935	-1.69272
6764	ST5	0	0	0	0	-2.25902	-2.31792	-2.13203	-2.19092
6703	SPRR2D	-3.63065	-6.85175	-3.64864	-6.86975	0	0	0	0
6700	SPRR2A	-2.92972	-10.9241	-3.05277	-11.0471	0	0	0	0
6675	UAP1	0	0	0	0	-1.8821	-1.21145	-1.99844	-1.3278
6662	SOX9	-1.11818	-1.99031	-1.24533	-2.11746	1.11818	1.99031	1.24533	2.11746
6536	SLC6A9	-2.07039	-2.67831	-2.14553	-2.75346	0	0	0	0
6389	SDHA	0	0	0	0	-1.39571	-1.01104	-1.47793	-1.09327
5362	PLXNA2	-1.8748	-1.74197	-2.19413	-2.0613	0	0	0	0
5347	PLK1	0.522115	0.688994	0.457064	0.623944	-1.41994	-1.74719	-1.2076	-1.53485
5332	PLCB4	-1.32004	-1.61164	-1.76498	-2.05658	0	0	0	0
5287	PIK3C2B	-1.27417	-1.06623	-1.50447	-1.29653	0	0	0	0
5266	PI3	-2.81268	-5.02169	-2.53881	-4.74782	0	0	0	0
5209	PFKFB3	2.43067	2.24487	2.41145	2.22566	0	0	0	0
5176	SERPINF1	1.34943	1.07957	1.63042	1.36056	0	0	0	0
5104	SERPINA5	1.81885	1.82212	1.93914	1.94241	0	0	0	0
5050	PAFAH1B3	0	0	0	0	-1.20541	-1.14453	-1.29388	-1.233
5017	OVOL1	-2.33994	-3.55982	-1.79326	-3.01314	0	0	0	0
4909	NTF4	2.07878	1.93141	1.43233	1.28497	0	0	0	0
4314	MMP3	-3.39654	-3.61155	-3.62779	-3.8428	0	0	0	0
4254	KITLG	0	0	0	0	3.15987	3.34207	2.82002	3.00222
4128	MAOA	1.59303	1.01537	1.67361	1.09595	0	0	0	0
3897	L1CAM	-1.75002	-1.75002	-1.73039	-1.73039	0	0	0	0
3860	KRT13	-2.05274	-4.60733	-2.6078	-5.16239	0	0	0	0
3785	KCNQ2	0	0	0	0	1.69839	1.26538	1.69526	1.26225
3678	ITGA5	-1.26693	-1.58169	-1.29384	-1.6086	0	0	0	0
3622	ING2	0	0	0	0	-2.24236	-1.41669	-2.53322	-1.70755
3569	IL6	0	0	0	0	-8.19476	-4.87283	-7.8009	-4.47897
3554	IL1R1	0	0	0	0	-1.34729	-1.18432	-1.23171	-1.06874
3491	CYR61	0	0	0	0	1.13725	1.24666	1.06766	1.17706
3486	IGFBP3	-1.67636	-1.70402	-1.78368	-1.81134	3.17493	2.85798	1.58996	1.27302
3428	IFI16	0	0	0	0	-2.06954	-1.8376	-2.07046	-1.83852
3399	ID3	-1.11834	-1.19152	-1.11369	-1.18687	0	0	0	0
3201	HOXA4	1.7137	1.54031	1.25802	1.08463	0	0	0	0
3164	NR4A1	-2.78815	-2.81098	-1.73434	-1.75717	0	0	0	0
3162	HMOX1	1.28921	0.243494	0.856493	0.189226	-1.98868	-2.39374	-1.81164	-2.2167
3148	HMGB2	2.43446	2.75119	2.75976	3.07649	0	0	0	0
3142	HLX	0	0	0	0	-3.48767	-2.61891	-3.0156	-2.14684
2760	GM2A	1.04547	1.01991	1.18403	1.15847	0	0	0	0
2196	FAT2	-1.514	-3.57289	-2.03703	-4.09592	0	0	0	0
2149	F2R	10.6119	8.80735	10.6119	8.80735	0	0	0	0
1745	DLX1	-1.35311	-1.75607	-1.34359	-1.74655	0	0	0	0
1643	DDB2	1.19055	1.32122	1.23533	1.366	0	0	0	0
1601	DAB2	0	0	0	0	-2.10692	-2.63743	-1.88452	-2.41504
1482	NKX2-5	0	0	0	0	-1.39232	-1.57562	-1.23057	-1.41387
1364	CLDN4	-3.80174	-6.60909	-3.72217	-6.52952	0	0	0	0
994	CDC25B	0	0	0	0	-1.70964	-1.79595	-1.57958	-1.66589
901	CCNG2	0	0	0	0	-2.70763	-1.97441	-2.87532	-2.14211
896	CCND3	0	0	0	0	-1.20173	-1.02192	-1.18603	-1.00623
894	CCND2	-2.32232	-2.74661	-2.61689	-3.04118	0	0	0	0
891	CCNB1	0	0	0	0	-1.07844	-1.1242	-1.17715	-1.22292
860	RUNX2	0	0	0	0	-1.98388	-1.95217	-1.79355	-1.76184
760	CA2	-2.80666	-4.0146	-3.16237	-4.37032	0	0	0	0
701	BUB1B	0	0	0	0	-1.54923	-1.06949	-1.69125	-1.2115
323	APBB2	-1.05552	-1.4989	-1.48843	-1.9318	0	0	0	0
154	ADRB2	-1.68364	-2.06826	-1.70956	-2.09419	0	0	0	0
136	ADORA2B	-1.43668	-1.53024	-1.36945	-1.46301	0	0	0	0
115	ADCY9	0	0	0	0	-2.14469	-1.98686	-1.66866	-1.51083

## Sheet: RNA-seq
Gene_ID	Gene_Name	NT1_vs_T5	NT1_vs_T6	NT2_vs_T5	NT2_vs_T6	Status	NT1_vs_NTT3	NT1_vs_NTT4	NT2_vs_NTT3	NT2_vs_NTT4	Status	NTT3_vs_TT7	NTT3_vs_TT8	NTT4_vs_TT7	NTT4_vs_TT8	Status	T5_vs_TT7	T5_vs_TT8	T6_vs_TT7	T6_vs_TT8	Status
100128233	LOC100128233	-0.787803	-1.18975	-0.109731	-0.511673	NC	0.44271	0.571352	1.12078	1.24942	NC	0.13035	-0.254835	0.00170834	-0.383477	NC	1.36086	0.975678	1.76281	1.37762	U
100129792	CCDC152	-0.934073	-0.679378	-1.16483	-0.910139	NC	1.40521	0.96029	1.17445	0.729529	NC	-0.793659	-0.779487	-0.348737	-0.334565	NC	1.54563	1.5598	1.29093	1.3051	U
100130017	FTLP10	-0.400962	-1	-0.442782	-1.04182	NC	0.825426	1.01582	0.783606	0.974005	NC	0.479428	-0.0180716	0.28903	-0.20847	NC	1.70582	1.20832	2.30485	1.80735	U
100130744	LOC100130744	0.307734	-0.271128	0.21494	-0.363922	NC	0.588322	0.049582	0.495527	-0.0432121	NC	1.0117	1.01668	1.55043	1.55542	NR	1.29228	1.29727	1.87114	1.87613	U
100130776	AGAP2-AS1	0.23974	-0.0403675	0.397704	0.117596	NC	-0.747528	-0.356309	-0.589564	-0.198345	NC	-1.4956	-0.675309	-1.88682	-1.06653	NR	-2.48287	-1.66258	-2.20276	-1.38247	D
100132832	PMS2P9	-0.312517	-0.933573	-0.566712	-1.18777	NC	0.790641	0.335461	0.536446	0.0812654	NC	0.573271	-0.0219994	1.02845	0.433181	NC	1.67643	1.08116	2.29748	1.70221	U
100133612	LINC01134	-0.783321	-0.467294	-1.33171	-1.01568	NC	1.17435	1.17182	0.625965	0.623437	NC	-0.29626	-0.346775	-0.293731	-0.344246	NC	1.66141	1.6109	1.34539	1.29487	U
100271836	SMG1P3	-0.519253	-1.19005	-0.734881	-1.40568	NC	0.938757	-0.271051	0.72313	-0.486679	NC	0.0775035	-0.312009	1.28731	0.897799	NC	1.53551	1.146	2.20631	1.8168	U
100272217	LOC100272217	-0.819428	1.1375	-1.88982	0.0671142	NC	1.02385	1.63227	-0.0465426	0.561879	NC	1.61616	1.62385	1.00774	1.01543	NR	3.45943	3.46713	1.5025	1.51019	U
100289495	LOC100289495	-0.371969	-1.08092	-0.760534	-1.46949	NC	1.52242	0.710493	1.13386	0.321928	NC	-0.569071	-0.603341	0.242857	0.208587	NC	1.32532	1.29105	2.03427	2	U
100289574	HERC2P4	0.443607	-0.836501	-0.79518	-2.07529	NC	1.1635	0.879706	-0.0752881	-0.359081	NC	0.30117	0.602036	0.584963	0.885829	NC	1.02106	1.32193	2.30117	2.60204	U
100294145	LOC100294145	0.942053	0.596278	0.801454	0.455679	NC	0.0881309	-0.79886	-0.0524674	-0.939458	NC	-1.49185	-1.24393	-0.604862	-0.356935	NR	-2.34577	-2.09785	-2	-1.75207	D
100294362	LOC100294362	-0.813231	-0.675728	-1.20163	-1.06413	NC	0.934002	0.573185	0.5456	0.184783	NC	-0.155418	-0.239892	0.205399	0.120925	NC	1.59182	1.50734	1.45431	1.36984	U
100302137	MIR1914	1.05589	0.611707	1.27579	0.831602	NC	-1.14336	-0.708994	-0.923469	-0.489099	NC	0.0359875	0.648156	-0.398382	0.213787	NC	-2.16327	-1.5511	-1.71908	-1.10692	D
100329109	GCSHP3	-0.272433	0.387849	-0.385025	0.275258	NC	-0.891747	-0.594361	-1.00434	-0.706953	NC	0.017278	-0.883186	-0.280108	-1.18057	NC	-0.602036	-1.5025	-1.26232	-2.16278	D
100505696	SH3BP5-AS1	-0.722936	-0.895773	-0.553598	-0.726435	NC	0.882563	0.41033	1.0519	0.579668	NC	0.522453	0.335122	0.994686	0.807355	NC	2.12795	1.94062	2.30079	2.11346	U
100505776	LINC01541	-0.206451	0.0931094	-0.0721498	0.22741	NC	0.366128	0.678072	0.500429	0.812373	NC	0.974909	0.633872	0.662965	0.321928	NC	1.54749	1.20645	1.24793	0.906891	U
100506007	RTCA-AS1	-0.599462	0.400538	-1.85042	-0.850424	NC	1.79909	1.05658	0.548126	-0.194378	NC	-0.442943	1.1193	0.29956	1.8618	NC	1.95561	3.51785	0.955606	2.51785	U
100506054	RNASEH1-AS1	0.532874	0.795908	-0.0944348	0.1686	NC	-0.0886144	-0.899237	-0.715923	-1.52655	NC	-0.58823	-0.484122	0.222392	0.326501	NC	-1.20972	-1.10561	-1.47275	-1.36864	D
100506311	HOTAIRM1	-1.09276	-0.915642	-0.435479	-0.258358	NC	0.503243	0.605848	1.16053	1.26313	NC	-0.124103	-0.22764	-0.226709	-0.330246	NC	1.4719	1.36837	1.29478	1.19124	U
100506321	LOC100506321	1.02536	0.635236	-0.0445464	-0.434666	NC	-0.244734	-0.0520885	-1.31464	-1.12199	NC	-2.72489	-0.665999	-2.91754	-0.858644	NR	-3.99498	-1.93609	-3.60486	-1.54597	D
100506495	LIFR-AS1	-0.855183	-0.436099	-0.419084	0	NC	0.348563	0.5456	0.784662	0.981699	NC	0.712837	0.209263	0.5158	0.0122263	NC	1.91658	1.41301	1.4975	0.993925	U
100506627	DCDC5	0.0740006	-1	-0.378512	-1.45251	NC	0.68281	1.22781	0.230298	0.775294	NC	0.654225	0.239188	0.109229	-0.305808	NC	1.26303	0.847997	2.33703	1.922	U
100506674	LOC100506674	-1.32833	-0.312384	-0.917538	0.0984037	NC	0.655554	0.606086	1.06634	1.01687	NC	-0.135883	0.425133	-0.0864148	0.474602	NC	1.848	2.40901	0.832055	1.39307	U
100507178	SLFNL1-AS1	-0.938786	-0.746676	-0.401057	-0.208947	NC	0.0887759	0.976358	0.626505	1.51409	NC	0.72685	0.344018	-0.160732	-0.543564	NC	1.75441	1.37158	1.5623	1.17947	U
100532735	INO80B-WBP1	-0.372064	-0.671422	0.0766882	-0.22267	NC	-0.981426	-1.24478	-0.532673	-0.796029	NC	-0.91282	-1.17013	-0.649465	-0.90677	NC	-1.52218	-1.77949	-1.22282	-1.48013	D
100533178	PRORY	-0.259644	0.190522	-0.838938	-0.388772	NC	0.624032	0.800062	0.0447383	0.220769	NC	1.04873	0.708044	0.872696	0.532014	NC	1.9324	1.59172	1.48224	1.14155	U
100874095	ADIPOQ-AS1	-0.0931094	-0.941106	-0.0317089	-0.879706	NC	0.874469	1.12928	0.93587	1.19068	NC	0.958421	-0.505235	0.703607	-0.760049	NC	1.926	0.462343	2.774	1.31034	U
100996437	LOC100996437	-0.0400774	-0.356935	-0.720618	-1.03747	NC	1.66816	-0.212545	0.987616	-0.893085	NC	-0.17148	0.175442	1.70922	2.05614	NR	1.53675	1.88368	1.85361	2.20053	U
100996511	LINC01355	-1.02647	-0.226771	0.36257	1.16227	NC	0.610958	-0.571906	2	0.817136	NC	0.797507	1.16993	1.98037	2.35279	NR	2.43494	2.80735	1.63524	2.00765	U
100996579	LOC100996579	-1.41504	-0.937716	-1.04182	-0.564498	NC	0.807355	-0.144948	1.18057	0.228269	NC	-0.133267	-0.187459	0.819037	0.764845	NC	2.08913	2.03493	1.6118	1.55761	U
10140	TOB1	-0.792593	-0.612508	-1.04081	-0.860729	NC	1.33414	0.507506	1.08592	0.259285	NC	-0.260004	-0.178005	0.566634	0.648634	NC	1.86673	1.94873	1.68665	1.76865	U
101669767	SCHLAP1	-0.603027	0.0855416	-0.870407	-0.181838	NC	1.16484	1.4505	0.897459	1.18312	NC	0.490202	-0.0916543	0.204539	-0.377318	NC	2.25807	1.67621	1.5695	0.987643	U
101927446	LOC101927446	-0.189034	-0.974909	1.05889	0.273018	NC	-0.341037	0.576501	0.906891	1.82443	NC	1.95936	1.1375	1.04182	0.219966	NC	1.80735	0.9855	2.59323	1.77138	U
101927559	CEBPB-AS1	1.02801	0.836878	0.8248	0.633664	NC	-1.12516	-0.560917	-1.32838	-0.764131	NC	0.0290876	0.202528	-0.535159	-0.361719	NC	-2.12409	-1.95065	-1.93295	-1.75951	D
101927583	LOC101927583	-1.67807	-1	-1.1375	-0.459432	NC	0.169925	0.584963	0.710493	1.12553	NC	0.959358	0.530515	0.544321	0.115477	NC	2.80735	2.37851	2.12928	1.70044	U
101927750	ATP6V1B1-AS1	0.487049	0.478921	0	-0.00812788	NC	-0.512951	0.11984	-1	-0.367209	NC	-0.98388	-0.409644	-1.61667	-1.04244	NC	-1.98388	-1.40964	-1.97575	-1.40152	D
101928174	LOC101928174	-1.13409	-0.846291	-0.287802	0	NC	0.264456	0.0085115	1.11075	0.854802	NC	0.866046	0.474215	1.12199	0.73016	NC	2.26459	1.87276	1.97679	1.58496	U
101928336	LOC101928336	0.0829894	-0.533682	0.079829	-0.536842	NC	1.00789	0.889918	1.00473	0.886757	NC	0.506843	0.0899594	0.624814	0.20793	NC	1.43174	1.01486	2.04841	1.63153	U
101928773	LINC01449	-0.31034	-0.0473057	-0.31034	-0.0473057	NC	0.569366	0.367732	0.569366	0.367732	NC	0.407175	1.45372	0.608809	1.65535	NR	1.28688	2.33342	1.02385	2.07039	U
101928841	LOC101928841	-0.801096	-0.914753	-0.398549	-0.512206	NC	0.373678	0.529549	0.776225	0.932096	NC	-0.029344	0.028759	-0.185215	-0.127112	NC	1.14543	1.20353	1.25909	1.31719	U
101929694	LOC101929694	-0.293991	-0.76957	-0.387604	-0.863183	NC	0.796955	1.28106	0.703342	1.18744	NC	0.0321122	0.337615	-0.451989	-0.146486	NC	1.12306	1.42856	1.59864	1.90414	U
10202	DHRS2	-0.817136	-0.817136	-0.817136	-0.817136	NC	0.899071	0.91983	0.899071	0.91983	NC	0.0207586	-0.250543	0	-0.271302	NC	1.73697	1.46566	1.73697	1.46566	U
102723701	LOC102723701	-0.684498	-1.44746	0.0794345	-0.683526	NC	-0.206451	1.12286	0.557482	1.88679	NC	0.962525	1.14923	-0.366782	-0.180082	NC	1.44057	1.62727	2.20353	2.39023	U
102724826	ZNF337-AS1	-0.406517	-0.517239	-0.153701	-0.264424	NC	0.673111	1.02025	0.925926	1.27307	NC	0.26802	0.0740737	-0.0791201	-0.273066	NC	1.34765	1.1537	1.45837	1.26442	U
10295	BCKDK	0.102499	0.0534999	-0.147125	-0.196124	NC	-0.285003	-0.598653	-0.534627	-0.848278	NC	-1.00068	-0.91513	-0.687027	-0.60148	NC	-1.38818	-1.30263	-1.33918	-1.25363	D
103352670	LINC01419	-0.64689	-0.537266	-0.211504	-0.10188	NC	1.18733	0.763394	1.62272	1.19878	NC	-0.307362	-0.151412	0.116576	0.272526	NC	1.52686	1.68281	1.41724	1.57319	U
103611081	LOC103611081	0.249359	-0.0744782	0.222392	-0.101445	NC	1.20675	0.500898	1.17979	0.473931	NC	0.384246	0.187723	1.0901	0.893578	NC	1.34164	1.14512	1.66548	1.46895	U
104355149	LINC01039	-0.442943	-0.398549	-0.930737	-0.886343	NC	0.736966	1.26442	0.249172	0.776622	NC	0.279523	0.652981	-0.247928	0.125531	NC	1.45943	1.83289	1.41504	1.7885	U
104548972	SALRNA3	-0.837864	-0.884034	-0.676651	-0.722821	NC	0.838787	0.499881	1	0.661094	NC	0.142019	-0.417408	0.480925	-0.078502	NC	1.81867	1.25924	1.86484	1.30541	U
105	ADARB2	-1.02237	-1.43741	-0.459432	-0.874469	NC	0.147557	0.516791	0.710493	1.07973	NC	0.874469	0.852443	0.505235	0.483209	NC	2.04439	2.02237	2.45943	2.43741	U
10557	RPP38	-0.362808	-0.191221	-0.167786	0.00380032	NC	-0.818304	-1.2667	-0.623282	-1.07167	NC	-0.670618	-0.834723	-0.222226	-0.386331	NC	-1.12611	-1.29022	-1.2977	-1.46181	D
10825	NEU3	-0.756729	-0.882906	-1.10945	-1.23563	NC	0.745353	-0.922219	0.392631	-1.27494	NC	-0.195875	-0.198751	1.4717	1.46882	NR	1.30621	1.30333	1.43238	1.42951	U
10846	PDE10A	NA	NA	NA	NA	NA	1	NA	1	NA	NC	0.584963	1	1.58496	2	NR	1.58496	2	1.58496	2	U
10848	PPP1R13L	0.0332252	-0.151541	0.0458692	-0.138897	NC	-0.548099	-1.19355	-0.535455	-1.18091	NC	-1.13929	-1.44119	-0.493837	-0.795731	NC	-1.72062	-2.02251	-1.53585	-1.83774	D
10951	CBX1	0.0221899	-0.0343329	-0.143015	-0.199538	NC	-0.415295	-0.865373	-0.5805	-1.03058	NC	-0.824943	-0.913203	-0.374864	-0.463124	NC	-1.26243	-1.35069	-1.2059	-1.29416	D
11030	RBPMS	0.554662	0.72691	0.321734	0.493983	NC	-0.714744	-0.947451	-0.947671	-1.18038	NC	-0.241518	-0.314008	-0.00881038	-0.0813001	NC	-1.51092	-1.58341	-1.68317	-1.75566	D
11054	OGFR	-0.0747233	0.0670599	0.378009	0.519792	NC	-1.08418	-1.09817	-0.631452	-0.64544	NC	-0.498393	-0.0753333	-0.484405	-0.061345	NC	-1.50785	-1.08479	-1.64964	-1.22658	D
11120	BTN2A1	0.00235927	0.204403	-0.0140752	0.187969	NC	-0.614784	-0.692786	-0.631218	-0.709221	NC	-0.709508	-0.563429	-0.631505	-0.485427	NC	-1.32665	-1.18057	-1.52869	-1.38262	D
11138	TBC1D8	-1.11872	-0.702178	-0.97565	-0.559104	NC	0.30459	0.443934	0.447664	0.587007	NC	0.527568	0.28315	0.388225	0.143806	NC	1.95088	1.70646	1.53434	1.28992	U
11222	MRPL3	-0.0367487	0.209412	0.0260969	0.272257	NC	-1.07249	-1.25844	-1.00964	-1.1956	NC	-0.244171	-0.0318761	-0.0582146	0.15408	NC	-1.27991	-1.06761	-1.52607	-1.31377	D
112849	L3HYPDH	0.237039	0.673772	0.237039	0.673772	NC	-0.0885367	-1.1193	-0.0885367	-1.1193	NC	-0.900059	-1.41301	0.130704	-0.382248	NC	-1.22563	-1.73859	-1.66237	-2.17532	D
113277	TMEM106A	-1.01233	-0.392701	-0.913891	-0.294261	NC	0.761919	0.719673	0.860359	0.818113	NC	0.216432	-0.371649	0.258679	-0.329403	NC	1.99068	1.4026	1.37105	0.782971	U
113540	CMTM1	0.542149	1.38628	-0.352881	0.491248	NC	-0.0780025	-1.078	-0.973033	-1.97303	NC	-5.75489	-0.397335	-4.75489	0.602665	NR	-6.37504	-1.01749	-7.21917	-1.86162	D
113691	TUBA3FP	-0.707218	-0.480626	-0.0857299	0.140863	NC	0.415037	0.786596	1.03653	1.40808	NC	0.419539	0.442943	0.04798	0.0713846	NC	1.54179	1.5652	1.3152	1.33861	U
114879	OSBPL5	0.0567006	-0.358662	-0.0029234	-0.418286	NC	-0.493566	-0.956036	-0.55319	-1.01566	NC	-1.13152	-0.678643	-0.669046	-0.216173	NC	-1.68178	-1.22891	-1.26642	-0.813547	D
115	ADCY9	0.619314	0.143286	0.303192	-0.172837	NC	0.268817	-0.982722	-0.0473057	-1.29884	NC	-1.79419	-1.63636	-0.542652	-0.384823	NR	-2.14469	-1.98686	-1.66866	-1.51083	D
115761	ARL11	-0.917538	-1.4245	-0.428334	-0.935294	NC	0.168877	0.470533	0.65808	0.959736	NC	0.112894	0.158698	-0.188762	-0.142958	NC	1.19931	1.24511	1.70627	1.75207	U
118672	PSTK	0.228987	-0.303124	0.563589	0.0314782	NC	-1.42206	-1.09115	-1.08746	-0.756546	NC	-0.341789	0	-0.672705	-0.330917	NC	-1.99284	-1.65105	-1.46073	-1.11894	D
124044	SPATA2L	0.228672	0.15887	0.358213	0.288411	NC	-1.03907	-1.18167	-0.909528	-1.05213	NC	-0.350497	0.060929	-0.207893	0.203533	NC	-1.61824	-1.20681	-1.54844	-1.13701	D
1241	LTB4R	-0.871027	-1.09672	-0.586762	-0.812461	NC	0.834254	0.713335	1.11852	0.9976	NC	0.233084	-0.166684	0.354003	-0.0457649	NC	1.93836	1.5386	2.16406	1.7643	U
125111	GJD3	0.200299	0.278301	0.026967	0.10497	NC	-0.969626	-0.467126	-1.14296	-0.640458	NC	-0.0614005	0	-0.563901	-0.5025	NC	-1.23133	-1.16993	-1.30933	-1.24793	D
125919	ZNF543	-0.489692	-0.151412	-0.33828	0	NC	1.08527	0.954025	1.23668	1.10544	NC	0.389088	-0.0906025	0.520332	0.040642	NC	1.96405	1.48436	1.62577	1.14608	U
126069	ZNF491	-0.0984037	-0.204014	-0.667425	-0.773035	NC	0.652077	0.758992	0.0830557	0.189971	NC	0.432586	0.628031	0.32567	0.521116	NC	1.18307	1.37851	1.28868	1.48412	U
132724	TMPRSS11B	-0.370368	-1.1836	-0.144948	-0.95818	NC	0.17897	0.852024	0.40439	1.07744	NC	0.683073	-0.0824622	0.0100188	-0.755516	NC	1.23241	0.466876	2.04564	1.28011	U
133584	EGFLAM	0.458925	0.659149	0.623984	0.824208	NC	-0.929345	-0.877257	-0.764286	-0.712198	NC	-0.611729	-0.429251	-0.663818	-0.48134	NC	-2	-1.81752	-2.20022	-2.01775	D
1363	CPE	0.659509	0.295456	0.0965733	-0.26748	NC	1.22005	0.983512	0.657112	0.420576	NC	0.429044	0.750972	0.665581	0.987509	NC	0.989583	1.31151	1.35364	1.67557	U
137392	FAM92A1	0.446673	0.494059	0.393785	0.44117	NC	-0.682455	-1.00168	-0.735344	-1.05457	NC	-0.453366	-0.227806	-0.134137	0.091423	NC	-1.58249	-1.35693	-1.62988	-1.40432	D
140685	ZBTB46	-0.176878	-1.11548	0.523562	-0.415037	NC	0.401098	-0.378512	1.10154	0.321928	NC	1.23236	0.302184	2.01197	1.08179	NR	1.81034	0.88016	2.74894	1.81876	U
140699	MROH8	-1.48543	-0.949374	-0.584963	-0.0489096	NC	-1.10692	-0.106915	-0.206451	0.793549	NC	1.60334	1.50901	0.603341	0.509014	NR	1.98185	1.88753	1.4458	1.35147	U
140735	DYNLL2	0.0604597	0.0534393	0.147342	0.140321	NC	1.16038	0.858141	1.24726	0.945023	NC	0.29064	0.153161	0.592876	0.455397	NC	1.39056	1.25308	1.39758	1.2601	U
140739	UBE2F	0	0.051322	0.236212	0.287534	NC	-1.21332	-0.868446	-0.977105	-0.632233	NC	-0.525628	0.0123367	-0.8705	-0.332535	NC	-1.73895	-1.20098	-1.79027	-1.2523	D
140803	TRPM6	-0.874469	-0.686842	-0.187627	0	NC	-0.371969	0.92139	0.314873	1.60823	NC	1.14775	1.06904	-0.145605	-0.224317	NC	1.65025	1.57154	1.46263	1.38391	U
144097	C11orf84	0.400738	0.25673	0.521918	0.37791	NC	-1.04874	-1.16888	-0.927564	-1.0477	NC	0.170476	-0.0881602	0.290608	0.0319724	NC	-1.27901	-1.53764	-1.135	-1.39363	D
145748	LYSMD4	1.06711	0.607683	1.1375	0.678072	NC	0.308122	0.192645	0.378512	0.263034	NC	-0.612977	-0.945552	-0.4975	-0.830075	NC	-1.37197	-1.70454	-0.912537	-1.24511	D
146456	TMED6	-0.261492	-1.0391	-0.157541	-0.935149	NC	0.181026	-0.00773565	0.284977	0.0962153	NC	1.13006	0.327362	1.31882	0.516124	NC	1.57258	0.76988	2.35019	1.54749	U
147664	ERVV-1	-1.03533	-1.47846	-0.338525	-0.781654	NC	0.416491	0.790638	1.1133	1.48745	NC	0.487294	-0.175931	0.113147	-0.550077	NC	1.93912	1.27589	2.38225	1.71902	U
147804	TPM3P9	0.0248985	-0.255797	-0.31202	-0.592716	NC	0.961827	0.572819	0.624909	0.235901	NC	0.270893	0.111615	0.659901	0.500623	NC	1.20782	1.04854	1.48852	1.32924	U
147912	SIX5	0.0831991	-0.315609	0.394311	-0.00449672	NC	-0.605616	-1.25822	-0.294504	-0.947105	NC	-1.08311	-1.07535	-0.430509	-0.422752	NC	-1.77193	-1.76417	-1.37312	-1.36536	D
149428	BNIPL	-1.20645	-0.68147	-0.837806	-0.312826	NC	0.658492	1.03217	1.02714	1.40081	NC	0.220599	0.0475947	-0.153079	-0.326084	NC	2.08554	1.91254	1.56056	1.38756	U
150935	LOC150935	0.698344	0.338169	-0.188445	-0.548621	NC	1.78304	1.07168	0.896252	0.184896	NC	0.629612	-0.22556	1.34097	0.485797	NC	1.71431	0.859137	2.07448	1.21931	U
151254	ALS2CR11	-1	-1.80735	0.222392	-0.584963	NC	-0.347923	0.652077	0.874469	1.87447	NC	1.66985	1.89812	0.669851	0.89812	NR	2.32193	2.5502	3.12928	3.35755	U
151475	LOC151475	-1.01886	-0.926937	-0.860597	-0.768674	NC	0.681581	1.03699	0.839843	1.19526	NC	-0.160465	-0.302109	-0.515878	-0.657522	NC	1.53998	1.39833	1.44805	1.30641	U
157381	LINC00964	0.0962153	-0.536053	0.226276	-0.405992	NC	0.291766	1.04891	0.421827	1.17897	NC	1.43522	1.04008	0.678072	0.282934	NC	1.63077	1.23563	2.26303	1.8679	U
157869	SBSPON	-0.0565835	-0.257496	0.666576	0.465664	NC	1.00692	0.27684	1.73008	1	NC	0.252643	0.33156	0.982722	1.06164	NC	1.31615	1.39506	1.51706	1.59598	U
159091	FAM122C	-0.939627	-0.741082	-0.441402	-0.242857	NC	-0.133399	0.679099	0.364826	1.17732	NC	0.748193	0.821455	-0.0643054	0.00895689	NC	1.55442	1.62768	1.35588	1.42914	U
162972	ZNF550	-0.0267173	-0.571787	-0.247218	-0.792287	NC	1.26707	1.11649	1.04657	0.895995	NC	0.132997	0.0645288	0.283575	0.215107	NC	1.42679	1.35832	1.97186	1.90339	U
163131	ZNF780B	-0.241008	-0.656046	-0.241008	-0.656046	NC	0.943416	1.07435	0.943416	1.07435	NC	0.594549	0.438293	0.463618	0.307362	NC	1.77897	1.62272	2.19401	2.03775	U
163732	CITED4	0.347196	0.40382	0.710082	0.766706	NC	-0.847289	-1.15693	-0.484403	-0.794042	NC	-0.225315	-0.195833	0.0843249	0.113806	NC	-1.4198	-1.39032	-1.47642	-1.44694	D
170463	SSBP4	0.0508424	-0.106131	0.0379628	-0.119011	NC	-0.321928	-0.284202	-0.334808	-0.297082	NC	-1.03673	-1.10466	-1.07445	-1.14238	NC	-1.4095	-1.47743	-1.25252	-1.32045	D
170960	ZNF721	-0.0629894	-0.0894616	-0.0446109	-0.0710831	NC	0.960662	0.81516	0.97904	0.833539	NC	0.353943	0.609002	0.499444	0.754503	NC	1.37759	1.63265	1.40407	1.65912	U
171024	SYNPO2	-0.0351894	-0.948775	-0.289507	-1.20309	NC	0.40632	0.982513	0.152003	0.728195	NC	1.05153	0.757799	0.475338	0.181607	NC	1.49304	1.19931	2.40663	2.11289	U
1823	DSC1	-0.929611	-1.46395	-0.465664	-1	NC	-0.391191	0.153805	0.0727563	0.617752	NC	1.21901	0.426815	0.674014	-0.118181	NC	1.75743	0.965235	2.29177	1.49957	U
1850	DUSP8	0.16665	-0.0297473	-0.466568	-0.662965	NC	0.707218	-0.366782	0.0740006	-1	NC	0.754888	0.57289	1.82889	1.64689	NR	1.29546	1.11346	1.49185	1.30986	U
1944	EFNA3	-0.0698054	0.358454	0.538712	0.966971	NC	-1.20241	-0.785137	-0.593896	-0.17662	NC	0.0995357	-0.549557	-0.31774	-0.966833	NC	-1.03307	-1.68216	-1.46133	-2.11042	D
1959	EGR2	-0.0995357	-0.633872	-0.440573	-0.974909	NC	0.917538	0.152003	0.576501	-0.189034	NC	0.219966	0.31853	0.9855	1.08406	NC	1.23704	1.3356	1.77138	1.86994	U
197196	LINC00311	-0.777608	-0.566427	-0.317658	-0.106477	NC	0.595975	0.59048	1.05593	1.05043	NC	0.090364	0.0696055	0.09586	0.0751015	NC	1.46395	1.44319	1.25277	1.23201	U
200845	KCTD6	-0.738996	0.281182	-0.564498	0.455679	NC	-0.96988	-1.04954	-0.795382	-0.875042	NC	-1.8314	-1.1375	-1.75174	-1.05784	NR	-2.06228	-1.36839	-3.08246	-2.38857	D
200916	RPL22L1	-0.840042	-0.976807	0.153098	0.0163326	NC	-0.48021	0.814606	0.51293	1.80775	NC	0.926201	1.42412	-0.368615	0.129305	NC	1.28603	1.78395	1.4228	1.92072	U
202781	PAXIP1-AS1	-0.429113	-0.588468	-0.840644	-1	NC	0.756443	0.913412	0.344911	0.501881	NC	0.6734	0.427421	0.516431	0.270452	NC	1.85896	1.61298	2.01831	1.77233	U
2030	SLC29A1	-0.00809368	0.335184	-0.282851	0.0604273	NC	-0.150883	-1.14641	-0.425639	-1.42117	NC	-1.0363	-1.28652	-0.0407696	-0.290996	NC	-1.17909	-1.42931	-1.52236	-1.77259	D
203062	TSNARE1	0.290001	-0.161105	0.409113	-0.0419941	NC	-0.674809	-0.72792	-0.555698	-0.608809	NC	-0.716828	-0.39776	-0.663717	-0.344648	NC	-1.68164	-1.36257	-1.23053	-0.911463	D
2101	ESRRA	-0.543086	-0.581015	-0.49213	-0.53006	NC	-0.910601	-0.897043	-0.859645	-0.846087	NC	-1.4548	-1.06977	-1.46835	-1.08333	NR	-1.82231	-1.43729	-1.78438	-1.39936	D
2113	ETS1	0.843434	1.10657	0.13414	0.397274	NC	0.358368	-0.500613	-0.350926	-1.20991	NC	-0.802104	-0.481057	0.0568771	0.377924	NC	-1.28717	-0.966123	-1.5503	-1.22926	D
219855	SLC37A2	-0.294591	-0.499965	-0.305966	-0.51134	NC	0.856011	0.870658	0.844636	0.859283	NC	0.342807	0.0877102	0.32816	0.0730635	NC	1.49341	1.23831	1.69878	1.44369	U
220441	RNF152	-0.263034	0.142958	-1.26303	-0.857042	NC	1.91488	0.874469	0.914883	-0.125531	NC	-0.360295	-0.280677	0.68012	0.759737	NC	1.81762	1.89724	1.41163	1.49125	U
2260	FGFR1	0.234465	-0.16319	-0.0388192	-0.436475	NC	0.980583	1.10056	0.707298	0.827279	NC	0.63743	0.260426	0.517448	0.140444	NC	1.38355	1.00654	1.7812	1.4042	U
22849	CPEB3	-0.351472	-0.685891	-0.785875	-1.12029	NC	0.597902	0.148099	0.163499	-0.286304	NC	0.567685	0.459432	1.01749	0.909235	NC	1.51706	1.40881	1.85148	1.74322	U
22889	KIAA0907	-0.0910413	0.134083	-0.589017	-0.363893	NC	1.10475	0.808988	0.606778	0.311012	NC	0.543083	0.577091	0.838849	0.872857	NC	1.73888	1.77289	1.51375	1.54776	U
2303	FOXC2	0.887253	0.948653	0.469695	0.531096	NC	-0.289507	-0.940703	-0.707064	-1.35826	NC	-0.156119	-0.300509	0.495077	0.350687	NC	-1.33288	-1.47727	-1.39428	-1.53867	D
23034	SAMD4A	-0.143302	-0.297336	-0.783682	-0.937716	NC	1.43403	1.13976	0.793651	0.499377	NC	-0.215778	-0.170308	0.0784961	0.123967	NC	1.36156	1.40703	1.51559	1.56106	U
23109	DDN	-0.771059	-0.99084	-1.11306	-1.33284	NC	1.02731	1.22502	0.685303	0.883012	NC	0.307429	0.141596	0.10972	-0.0561119	NC	2.10579	1.93996	2.32558	2.15974	U
2323	FLT3LG	1.14005	0.470004	1.76765	1.09761	NC	0.267696	0	0.895303	0.627607	NC	-1.4517	-0.880947	-1.184	-0.613252	NC	-2.32405	-1.7533	-1.654	-1.08326	D
2329	FMO4	0.131245	0.440573	-0.0614005	0.247928	NC	1.17754	0.561879	0.984893	0.369234	NC	0.474539	0.211504	1.0902	0.827163	NC	1.52083	1.2578	1.2115	0.94847	U
2356	FPGS	0.00520605	-0.150652	0.0596156	-0.096242	NC	-0.683895	-0.916297	-0.629486	-0.861887	NC	-0.71886	-0.740028	-0.486458	-0.507626	NC	-1.40796	-1.42913	-1.2521	-1.27327	D
23580	CDC42EP4	1.19875	1.2436	1.10647	1.15132	NC	-0.0622064	-0.50515	-0.154488	-0.597432	NC	-0.574635	-0.504344	-0.131692	-0.0614005	NC	-1.8356	-1.7653	-1.88044	-1.81015	D
23600	AMACR	0.332983	0.775294	-0.350281	0.0920291	NC	-0.0710831	-0.3254	-0.754348	-1.00866	NC	-0.489805	-1.0902	-0.235488	-0.835881	NC	-0.893872	-1.49426	-1.33618	-1.93657	D
23657	SLC7A11	-0.797811	-0.75409	-1.09657	-1.05285	NC	1.20219	1.01271	0.903427	0.713949	NC	-0.053701	-0.00834734	0.135777	0.18113	NC	1.9463	1.99165	1.90258	1.94793	U
24140	FTSJ1	0.0224223	0.102192	0.149243	0.229012	NC	-1.14141	-1.09808	-1.01459	-0.97126	NC	-0.38537	-0.16663	-0.428697	-0.209957	NC	-1.5492	-1.33046	-1.62897	-1.41023	D
255239	ANKK1	-1.09954	-0.658963	-0.415037	0.0255351	NC	0.366128	0.959358	1.05063	1.64386	NC	1.11356	0.499571	0.520332	-0.0936591	NC	2.57923	1.96523	2.13865	1.52466	U
256006	ANKRD31	-1	-1	NA	NA	NC	0	0	1	1	NC	2.90689	1	2.90689	1	NR	3.90689	2	3.90689	2	U
257160	RNF214	0.853582	0.634464	0.382616	0.163499	NC	-0.051261	-0.819254	-0.522227	-1.29022	NC	-1.06274	-0.671946	-0.294743	0.0960467	NC	-1.96758	-1.57679	-1.74846	-1.35767	D
259295	TAS2R20	-0.944858	-0.712198	-0.137504	0.0951572	NC	0.0551416	1.15948	0.862496	1.96683	NC	0.722466	1.03562	-0.381871	-0.0687128	NC	1.72247	2.03562	1.48981	1.80296	U
25936	NSL1	0.634483	0.827496	0.830403	1.02342	NC	-1.1193	-0.86458	-0.923379	-0.66866	NC	0.366985	0.646639	0.112266	0.39192	NC	-1.3868	-1.10714	-1.57981	-1.30016	D
25938	HEATR5A	0.0163018	-0.0887442	-0.466781	-0.571827	NC	1.12177	1.05034	0.638686	0.56726	NC	0.205069	0.25327	0.276495	0.324696	NC	1.31054	1.35874	1.41558	1.46378	U
26000	TBC1D10B	0.360187	0.505191	0.569488	0.714492	NC	-0.400499	-1.03251	-0.191198	-0.823209	NC	-0.670378	-0.812185	-0.0383664	-0.180174	NC	-1.43106	-1.57287	-1.57607	-1.71787	D
26119	LDLRAP1	0.222392	0.179108	0.166629	0.123345	NC	-0.939686	-1.16019	-0.995449	-1.21595	NC	-0.641728	-0.0698214	-0.421227	0.150679	NC	-1.80381	-1.2319	-1.76052	-1.18862	D
26574	AATF	-0.262684	-0.265048	0.0291571	0.0267935	NC	-1.14967	-1.10147	-0.85783	-0.809633	NC	-0.347879	-0.42722	-0.396077	-0.475418	NC	-1.23487	-1.31421	-1.2325	-1.31184	D
27237	ARHGEF16	0.869801	0.525153	0.600069	0.255421	NC	-0.721185	-1.02959	-0.990917	-1.29933	NC	-0.720958	-0.88964	-0.412548	-0.58123	NC	-2.31194	-2.48063	-1.9673	-2.13598	D
2796	GNRH1	-1.10269	-1.74802	0.438884	-0.206451	NC	-0.641106	-0.863498	0.900464	0.678072	NC	0.402098	1.18511	0.624491	1.4075	NC	0.863679	1.64669	1.50901	2.29203	U
283310	OTOGL	NA	NA	NA	NA	NA	1	NA	1	NA	NC	0.584963	0.584963	1.58496	1.58496	NR	1.58496	1.58496	1.58496	1.58496	U
283455	KSR2	1	0	1	0	NC	1	1	1	1	NC	1.58496	0.584963	1.58496	0.584963	NR	1.58496	0.584963	2.58496	1.58496	U
283487	LINC00346	-0.220266	-0.220266	-0.114333	-0.114333	NC	0.647427	1.05019	0.75336	1.15612	NC	0.384143	0.492396	-0.0186157	0.0896372	NC	1.25184	1.36009	1.25184	1.36009	U
283579	C14orf178	-1.25825	-0.754888	-0.949164	-0.4458	NC	-0.0499901	0.527961	0.259098	0.837049	NC	0.648199	0.228284	0.0702473	-0.349667	NC	1.85646	1.43655	1.3531	0.933182	U
283687	ST20-AS1	-0.415037	-0.415037	-0.983321	-0.983321	NC	1.32689	0.9558	0.758611	0.387516	NC	-0.383975	-0.271986	-0.0128813	0.0991081	NC	1.35796	1.46995	1.35796	1.46995	U
283856	LOC283856	-1.53343	-0.827163	-0.881356	-0.175087	NC	-0.0534393	-0.0264722	0.598637	0.625604	NC	0.731511	0.871992	0.704544	0.845025	NC	2.2115	2.35199	1.50524	1.64572	U
283899	INO80E	0.276712	0.329418	0.665246	0.717952	NC	-0.967726	-1.30279	-0.579192	-0.914258	NC	0.0564728	-0.386839	0.391539	-0.0517725	NC	-1.18796	-1.63128	-1.24067	-1.68398	D
283970	PDXDC2P	-0.464152	-0.620115	-0.430016	-0.585979	NC	1.06594	1.13353	1.10008	1.16767	NC	0.394032	0.259555	0.326444	0.191967	NC	1.92413	1.78965	2.08009	1.94561	U
284106	CISD3	0.0398573	0.00437549	0.00855074	-0.0269311	NC	-0.636511	-0.781299	-0.667817	-0.812605	NC	-0.776095	-0.953818	-0.631306	-0.80903	NC	-1.45246	-1.63019	-1.41698	-1.5947	D
284273	ZADH2	0.462499	0.360961	0.12808	0.0265418	NC	-1.06413	-0.797737	-1.39855	-1.13216	NC	-0.931053	0.29134	-1.19745	0.0249464	NC	-2.45768	-1.23529	-2.35614	-1.13375	D
284309	ZNF776	-0.0635029	-0.175978	-0.214125	-0.3266	NC	1.25264	0.650193	1.10202	0.499571	NC	0.207416	0.212426	0.809866	0.814876	NC	1.52356	1.52857	1.63604	1.64105	U
284440	LINC00663	-0.43456	-0.570492	-0.204878	-0.34081	NC	0.71646	0.929974	0.946142	1.15966	NC	0.181093	-0.0142314	-0.0324215	-0.227746	NC	1.33211	1.13679	1.46804	1.27272	U
285033	STARD7-AS1	0.020909	-0.290677	-0.639282	-0.950868	NC	1.25732	1.12114	0.597128	0.460945	NC	0.156402	0.0455283	0.292584	0.181711	NC	1.39281	1.28194	1.7044	1.59352	U
285540	SEPSECS-AS1	-0.379704	-0.579013	-0.403356	-0.602665	NC	1.0498	1.13099	1.02615	1.10733	NC	-0.113798	-0.184032	-0.19498	-0.265214	NC	1.31571	1.24548	1.51502	1.44478	U
286076	BREA2	-1.88634	-1.1812	-0.923697	-0.218556	NC	-0.948885	0.0982737	0.0137619	1.06092	NC	1.11828	0.584963	0.0711256	-0.462196	NC	2.05574	1.52242	1.3506	0.817281	U
286189	C8orf34-AS1	-1.90949	-0.324525	-1.1304	0.454566	NC	-0.391021	0.720263	0.38807	1.49935	NC	0.359542	1.34354	-0.751741	0.232259	NC	1.87801	2.86201	0.293047	1.27705	U
286207	C9orf117	0.163499	-0.0291463	0.38109	0.188445	NC	-0.736966	-1.12029	-0.519374	-0.902703	NC	-0.906891	-0.514573	-0.523562	-0.131245	NC	-1.80735	-1.41504	-1.61471	-1.22239	D
29075	LINC00652	-0.63941	-0.351165	-0.884523	-0.596278	NC	0.282202	1.02647	0.0370893	0.78136	NC	0.582519	0.496889	-0.161751	-0.247381	NC	1.50413	1.4185	1.21589	1.13026	U
29081	METTL5	0.168388	0.216967	0.429996	0.478575	NC	-1.17271	-1.39218	-0.911107	-1.13057	NC	-0.22474	-0.190492	-0.00527709	0.0289708	NC	-1.56584	-1.5316	-1.61442	-1.58017	D
29128	UHRF1	1.14852	0.961839	1.37381	1.18713	NC	-0.977008	-0.707337	-0.751716	-0.482044	NC	0.422148	-0.331942	0.152476	-0.601614	NC	-1.70338	-2.45747	-1.5167	-2.27079	D
29799	YPEL1	-1.22853	-0.740032	-0.721813	-0.233314	NC	0.806042	0.633157	1.31276	1.13988	NC	-0.299762	-0.0535384	-0.126878	0.119346	NC	1.73481	1.98103	1.24631	1.49254	U
29946	SERTAD3	0.315419	1.07678	0.68031	1.44167	NC	-0.515899	-1.24185	-0.151008	-0.87696	NC	-0.610053	-0.183671	0.115899	0.542282	NC	-1.44137	-1.01499	-2.20273	-1.77635	D
29990	PILRB	-0.451	-0.0316337	0.241008	0.660374	NC	-1.80862	-0.335522	-1.11662	0.356485	NC	-0.82449	0.346018	-2.29759	-1.12708	NC	-2.18211	-1.01161	-2.60148	-1.43097	D
3034	HAL	-1.078	-0.293731	-0.473931	0.31034	NC	0.306661	0.90182	0.910733	1.50589	NC	1.46778	1.2003	0.872621	0.60514	NR	2.85244	2.58496	2.06817	1.80069	U
30827	CXXC1	-0.0395542	0.0193777	0.086568	0.1455	NC	-1.01588	-1.30622	-0.889757	-1.1801	NC	-0.559823	-0.806885	-0.269481	-0.516544	NC	-1.53615	-1.78321	-1.59508	-1.84214	D
30844	EHD4	0.500055	0.277929	0.300543	0.0784162	NC	-0.679156	-1.17241	-0.878668	-1.37192	NC	-0.557755	-0.144314	-0.0645004	0.34894	NC	-1.73697	-1.32352	-1.51484	-1.1014	D
330	BIRC3	-0.134777	-0.0395284	-0.314202	-0.218953	NC	-0.783189	-0.642638	-0.962614	-0.822063	NC	-0.69291	-0.519374	-0.833461	-0.659925	NC	-1.34132	-1.16779	-1.43657	-1.26303	D
338657	CCDC84	-0.730328	-0.364608	-0.539583	-0.173863	NC	-0.911531	-0.114685	-0.720786	0.0760601	NC	-1.19699	-0.66774	-1.99384	-1.46459	NR	-1.3782	-0.848943	-1.74392	-1.21466	D
339059	LOC339059	-1.12676	-0.233672	-0.939879	-0.0467942	NC	0.553154	0.534657	0.740032	0.721536	NC	0.606246	-0.155069	0.624742	-0.136573	NC	2.28616	1.52484	1.39307	0.631757	U
3397	ID1	0.109256	0.177845	0.33356	0.402149	NC	-0.984641	-0.354203	-0.760337	-0.129899	NC	-1.08298	-1.17458	-1.71342	-1.80502	NR	-2.17688	-2.26848	-2.24547	-2.33706	D
339829	CCDC39	0.237039	0.0995357	1.04439	0.906891	NC	1	0.0995357	1.80735	0.906891	NC	0.716207	0.421464	1.61667	1.32193	NR	1.47917	1.18442	1.61667	1.32193	U
345275	HSD17B13	-0.891528	-0.82564	-0.0658879	0	NC	-0.0405382	1.06397	0.785102	1.88961	NC	0.367545	0.526484	-0.736966	-0.578026	NC	1.21853	1.37747	1.15265	1.31159	U
347252	IGFBPL1	-0.530515	-1.16439	-0.180572	-0.814444	NC	-0.0450879	1.09657	0.304855	1.44652	NC	0.905363	0.152003	-0.236298	-0.989658	NC	1.39079	0.63743	2.02466	1.2713	U
36	ACADSB	-0.0292119	-0.271413	-0.212994	-0.455195	NC	1.2118	1.09331	1.02801	0.909528	NC	0.0887679	0.0504347	0.207254	0.168921	NC	1.32978	1.29144	1.57198	1.53364	U
3727	JUND	-0.17187	-0.285985	0.191922	0.0778067	NC	-1.10112	-1.373	-0.737324	-1.00921	NC	-0.522589	-0.53332	-0.250707	-0.261438	NC	-1.45183	-1.46257	-1.33772	-1.34845	D
375295	LINC01116	-0.250651	0.250543	0.285402	0.786596	NC	-0.354155	0.420468	0.181898	0.956521	NC	-0.867201	-1.1375	-1.64182	-1.91213	NR	-0.970706	-1.24101	-1.4719	-1.7422	D
379013	RNF138P1	-0.654004	-0.81073	-0.680721	-0.837447	NC	1.03989	1.1594	1.01318	1.13268	NC	0.494765	-0.226771	0.375258	-0.346278	NC	2.18866	1.46713	2.34539	1.62385	U
387640	SKIDA1	-0.500898	-0.736966	-0.421827	-0.657894	NC	0.910733	1.01911	0.989804	1.09818	NC	-0.0415193	-0.332196	-0.149895	-0.440573	NC	1.37011	1.07943	1.60618	1.3155	U
388335	TMEM220	-0.804449	-0.632268	-1	-0.827819	NC	0.853159	0.472068	0.657608	0.276518	NC	0.910322	0.253341	1.29141	0.634431	NC	2.56793	1.91095	2.39575	1.73877	U
388507	ZNF788	-1.60618	-0.869213	-0.657894	0.0790716	NC	-0.411532	0.285672	0.536753	1.23396	NC	1.08168	0.868088	0.38448	0.170885	NC	2.27633	2.06274	1.53937	1.32577	U
391	RHOG	-0.372448	-0.397999	0.0459989	0.0204478	NC	-0.919366	-1.35928	-0.50092	-0.940838	NC	-0.837297	-0.991512	-0.397379	-0.551594	NC	-1.38422	-1.53843	-1.35866	-1.51288	D
4015	LOX	-0.430395	-0.324834	-0.932572	-0.82701	NC	1.37696	-0.421366	0.874783	-0.923542	NC	-0.466773	-0.480823	1.33155	1.3175	NR	1.34058	1.32653	1.23502	1.22097	U
403312	LOC403312	-1.17319	-0.378512	-0.584963	0.209719	NC	0.543014	0.659181	1.13124	1.24741	NC	0.420627	0.0527874	0.304461	-0.0633789	NC	2.13683	1.76899	1.34215	0.974313	U
403323	LOC403323	-0.23376	-0.613212	-0.542036	-0.921488	NC	0.874832	0.126197	0.566556	-0.182079	NC	-0.0420125	0.123168	0.706623	0.871804	NC	1.06658	1.23176	1.44603	1.61121	U
41	ASIC1	0.118181	-0.218001	0.356792	0.0206103	NC	-0.487187	-0.177643	-0.248576	0.060968	NC	-0.641546	-1.41093	-0.95109	-1.72048	NR	-1.24691	-2.0163	-0.910733	-1.68012	D
4117	MAK	-1.09954	-1.37638	-0.152003	-0.428843	NC	0.398918	0.217805	1.34645	1.16534	NC	-0.074854	0.325166	0.106259	0.506279	NC	1.4236	1.82362	1.70044	2.10046	U
414245	DNAJC9-AS1	-1.82631	-0.799841	-1.06529	-0.0388192	NC	-0.236905	1.13133	0.524117	1.89235	NC	0.713696	-0.0869081	-0.654535	-1.45514	NC	2.3031	1.5025	1.27663	0.476028	U
416	ARSF	-1.09954	-1.27462	0.222392	0.0473057	NC	-0.184425	1.1375	1.1375	2.45943	NC	0.762961	0.381871	-0.558967	-0.940057	NC	1.67807	1.29698	1.85316	1.47207	U
441172	FLJ46906	-1.35755	-0.567475	-1.02975	-0.23967	NC	0.838845	1.02327	1.16665	1.35107	NC	-0.242201	-0.00657265	-0.426625	-0.190997	NC	1.9542	2.18982	1.16412	1.39975	U
441212	RP9P	0.578323	0.586287	0.122147	0.13011	NC	-0.579013	-0.232363	-1.03519	-0.688539	NC	-0.156628	-0.847997	-0.503279	-1.19465	NC	-1.31396	-2.00533	-1.32193	-2.0133	D
441518	FAM127C	0.272741	0.37261	0.1127	0.212569	NC	-0.407	-0.323944	-0.567041	-0.483985	NC	-0.916944	-0.750386	-1	-0.833442	NC	-1.59668	-1.43013	-1.69655	-1.53	D
441733	PRKXP1	0.584963	-0.25952	0.33149	-0.512993	NC	1.20087	0.318405	0.947396	0.0649322	NC	0.729292	-0.0289902	1.61176	0.853474	NC	1.3452	0.586916	2.18968	1.4314	U
4435	CITED1	0.124545	0.734599	0.124545	0.734599	NC	0.124545	-0.0238467	0.124545	-0.0238467	NC	-1.17264	-1.27392	-1.02425	-1.12553	NC	-1.17264	-1.27392	-1.78269	-1.88398	D
4774	NFIA	0.115786	0.115786	-0.219741	-0.219741	NC	-0.815415	-0.348289	-1.15094	-0.683816	NC	-0.341508	-0.462972	-0.808634	-0.930098	NC	-1.27271	-1.39417	-1.27271	-1.39417	D
4782	NFIC	-0.314688	-0.515595	-0.0926209	-0.293527	NC	-0.662514	-1.23603	-0.440446	-1.01397	NC	-1.55375	-1.67007	-0.980233	-1.09655	NR	-1.90158	-2.01789	-1.70067	-1.81699	D
4848	CNOT2	0.00153997	0.0667406	0.29436	0.359561	NC	-1.30229	-1.08624	-1.00947	-0.793423	NC	-0.344588	-0.481127	-0.560633	-0.697172	NC	-1.64842	-1.78496	-1.71362	-1.85016	D
4864	NPC1	1.49544	1.13014	0.734137	0.368835	NC	1.8619	0.892855	1.10059	0.131552	NC	0.628758	0.886991	1.5978	1.85603	NR	0.995215	1.25345	1.36052	1.61875	U
4938	OAS1	0.909513	1.05445	0.960523	1.10546	NC	-0.220008	-0.729824	-0.168998	-0.678814	NC	-0.341871	-0.163165	0.167945	0.346651	NC	-1.47139	-1.29269	-1.61633	-1.43762	D
51090	PLLP	0.84101	0.467393	0.260236	-0.113382	NC	-0.14505	-0.914753	-0.725825	-1.49553	NC	-0.746243	-0.224706	0.023459	0.544996	NC	-1.7323	-1.21077	-1.35869	-0.83715	D
51116	MRPS2	-0.351157	-0.514469	-0.261242	-0.424554	NC	-1.11231	-1.25974	-1.02239	-1.16983	NC	-0.646432	-0.703958	-0.498997	-0.556522	NC	-1.40758	-1.46511	-1.24427	-1.3018	D
51172	NAGPA	-0.0744096	-0.0991657	0.458409	0.433653	NC	-1.20864	-0.961662	-0.675825	-0.428843	NC	-0.674485	-0.158002	-0.921467	-0.404984	NC	-1.80872	-1.29224	-1.78396	-1.26748	D
51307	FAM53C	0.100388	-0.138526	-0.106461	-0.345375	NC	1.34576	0.969427	1.13891	0.762578	NC	-0.0414948	0.0351086	0.334839	0.411443	NC	1.20388	1.28048	1.44279	1.5194	U
51537	MTFP1	0.401331	0.155055	0.741932	0.495656	NC	-1.16883	-1.42599	-0.828234	-1.08539	NC	-1.49923	-0.859822	-1.24207	-0.602665	NR	-3.0694	-2.42999	-2.82312	-2.18371	D
51557	LGSN	-0.667425	-1.16993	-0.40439	-0.906891	NC	-0.026967	0.799701	0.236067	1.06274	NC	0.871992	0.461904	0.045324	-0.364764	NC	1.51245	1.10236	2.01495	1.60486	U
51742	ARID4B	-0.295985	-0.181607	-0.111443	0.00293529	NC	-0.876194	-0.211232	-0.691652	-0.0266899	NC	-2.11864	-0.533682	-2.78361	-1.19864	NR	-2.69885	-1.11389	-2.81323	-1.22827	D
51762	RAB8B	0.0393487	-0.0891259	0.171543	0.0430687	NC	-1.14684	-1.25376	-1.01465	-1.12156	NC	-0.424885	-0.592342	-0.31797	-0.485427	NC	-1.61108	-1.77853	-1.4826	-1.65006	D
5208	PFKFB2	0.0374747	-0.193851	-0.29956	-0.530886	NC	0.688056	0.32024	0.351021	-0.0167952	NC	0.640606	1.00653	1.00842	1.37435	NC	1.29119	1.65711	1.52251	1.88844	U
5239	PGM5	-1	-1	NA	NA	NC	-1	1	NA	2	NC	3	2	1	0	NR	3	2	3	2	U
541565	C8orf58	-0.43445	-0.362821	0.0604739	0.132104	NC	-0.991262	-1.36282	-0.496338	-0.867896	NC	-1.16993	-2.20163	-0.798366	-1.83007	NR	-1.72674	-2.75845	-1.79837	-2.83007	D
54606	DDX56	-0.269246	-0.311035	0.0796518	0.0378625	NC	-1.36634	-1.15423	-1.01744	-0.805327	NC	-0.127977	-0.155159	-0.340092	-0.367274	NC	-1.22507	-1.25225	-1.18328	-1.21046	D
54663	WDR74	-0.25952	-0.341037	0.221838	0.140321	NC	-1.52733	-1.16098	-1.04597	-0.679624	NC	-0.0433518	-0.581297	-0.409698	-0.947644	NC	-1.31116	-1.84911	-1.22964	-1.76759	D
54813	KLHL28	-0.145717	-0.159724	-0.486422	-0.500429	NC	1.04954	0.688273	0.708834	0.347568	NC	0.0151386	0.328003	0.376405	0.689269	NC	1.21039	1.52326	1.2244	1.53727	U
548593	SLX1A	-0.243619	-0.2028	-0.00529819	0.0355207	NC	0.9892	0.956768	1.22752	1.19509	NC	0.139391	0.120818	0.171823	0.15325	NC	1.37221	1.35364	1.33139	1.31282	U
54938	SARS2	-0.318758	-0.447844	0.263245	0.13416	NC	-1.17141	-1.67756	-0.589403	-1.09556	NC	-0.490008	-0.684566	0.0161497	-0.178408	NC	-1.34266	-1.53721	-1.21357	-1.40813	D
54942	FAM206A	0.443372	0.668279	0.435408	0.660315	NC	-1.19544	-1.08215	-1.2034	-1.09011	NC	0.103864	-0.00815084	-0.00942325	-0.121438	NC	-1.53494	-1.64696	-1.75985	-1.87187	D
54951	COMMD8	0	0.780853	0.152622	0.933475	NC	-0.918776	-0.288888	-0.766154	-0.136266	NC	-0.705715	-0.671767	-1.3356	-1.30166	NR	-1.62449	-1.59054	-2.40534	-2.3714	D
55088	CCDC186	0.212371	0.0621948	-0.590438	-0.740613	NC	1.74331	1.05303	0.940499	0.250227	NC	-0.0981804	0.0883559	0.592092	0.778628	NC	1.43276	1.61929	1.58293	1.76947	U
55219	TMEM57	0.367329	0.450792	0.398046	0.481508	NC	-0.70514	-0.980468	-0.674424	-0.949752	NC	-0.213192	-0.261287	0.0621352	0.0140409	NC	-1.28566	-1.33376	-1.36912	-1.41722	D
55279	ZNF654	0.217231	0.491853	0.0879477	0.36257	NC	1.07468	0.263034	0.945394	0.133751	NC	0.407526	0.867838	1.21917	1.67948	NR	1.26497	1.72528	0.99035	1.45066	U
55311	ZNF444	-0.000950079	-0.112552	0.287185	0.175584	NC	-1.19604	-1.24698	-0.907906	-0.958843	NC	-0.591505	-0.853229	-0.540568	-0.802292	NC	-1.7866	-2.04832	-1.67499	-1.93672	D
55366	LGR4	0	-0.187203	-0.501153	-0.688356	NC	0.965235	0.711553	0.464082	0.210401	NC	0.159024	0.465461	0.412705	0.719143	NC	1.12426	1.4307	1.31146	1.6179	U
55501	CHST12	-0.0778709	-0.0481746	0.15006	0.179756	NC	-0.669098	-0.811507	-0.441167	-0.583576	NC	-1.00377	-1.01134	-0.861363	-0.868936	NC	-1.595	-1.60257	-1.62469	-1.63227	D
5554	PRH1	-0.105353	-1.2671	0.263034	-0.898717	NC	0.154034	0.689457	0.522421	1.05784	NC	1.27365	-0.0558532	0.738225	-0.591276	NC	1.53303	0.203533	2.69479	1.36528	U
55609	ZNF280C	-0.19656	-0.152438	-0.38676	-0.342637	NC	0.856227	1.37037	0.666028	1.18017	NC	0.364489	0.478933	-0.149653	-0.0352081	NC	1.41728	1.53172	1.37315	1.4876	U
55623	THUMPD1	0.350201	0.433395	0.209495	0.292688	NC	-1.18046	-0.732494	-1.32117	-0.8732	NC	-0.0153073	0.15846	-0.463274	-0.289507	NC	-1.54597	-1.3722	-1.62916	-1.4554	D
55707	NECAP2	-0.289919	-0.0762644	-0.206364	0.0072906	NC	-0.933127	-1.08806	-0.849572	-1.0045	NC	-0.599216	-0.642843	-0.444284	-0.487911	NC	-1.24242	-1.28605	-1.45608	-1.49971	D
55714	TENM3	-0.370368	-0.773724	-1	-1.40336	NC	1.4619	0.979439	0.832273	0.349807	NC	-0.218281	-0.161919	0.264184	0.320547	NC	1.61399	1.67035	2.01735	2.07371	U
55775	TDP1	0.623695	0.75743	0.618796	0.752531	NC	-0.629817	-0.385891	-0.634716	-0.39079	NC	-0.256973	-0.00761318	-0.500898	-0.251539	NC	-1.51048	-1.26112	-1.64422	-1.39486	D
55854	ZC3H15	-0.326899	-0.0646943	-0.0651042	0.1971	NC	-1.29489	-0.985927	-1.0331	-0.724133	NC	-0.355024	-0.114615	-0.663989	-0.42358	NC	-1.32302	-1.08261	-1.58522	-1.34481	D
55893	ZNF395	0.72785	0.537203	0.792318	0.601671	NC	-0.0375723	-0.778668	0.0268952	-0.7142	NC	-1.2085	-0.975467	-0.467407	-0.234372	NC	-1.97392	-1.74089	-1.78328	-1.55024	D
55915	LANCL2	0.0079052	-0.048363	0.161083	0.104815	NC	-1.03747	-1.15024	-0.884297	-0.997065	NC	-0.327362	-0.742399	-0.214594	-0.629632	NC	-1.37274	-1.78778	-1.31647	-1.73151	D
55929	DMAP1	-0.565701	-0.632268	0.115477	0.0489096	NC	-1.22628	-1.19931	-0.545098	-0.518131	NC	-1.23963	-1.0152	-1.2666	-1.04217	NR	-1.90021	-1.67578	-1.83364	-1.60921	D
55972	SLC25A40	0.900464	1.1684	0.444785	0.712718	NC	0.678072	-0.485427	0.222392	-0.941106	NC	-1.10692	-1.12553	0.0565835	0.0379678	NC	-1.32931	-1.34792	-1.59724	-1.61586	D
56034	PDGFC	1.18778	1.46354	0.59208	0.867838	NC	0.722662	-0.0393487	0.126957	-0.635054	NC	-1.13986	-1.02372	-0.377847	-0.261705	NC	-1.60498	-1.48884	-1.88074	-1.7646	D
56106	PCDHGA10	0.68966	0.878694	-0.895303	-0.706269	NC	2.41649	0.813988	0.831529	-0.770974	NC	-0.236261	-0.365063	1.36624	1.23744	NR	1.49057	1.36177	1.30154	1.17273	U
5611	DNAJC3	-0.399283	-0.371178	-0.628449	-0.600343	NC	1.03411	1.09457	0.804949	0.8654	NC	-0.10345	0.213294	-0.163902	0.152843	NC	1.32995	1.64669	1.30184	1.61859	U
56242	ZNF253	-0.704757	-0.342187	-0.971618	-0.609048	NC	0.690235	0.399144	0.423373	0.132283	NC	0.498093	0.158401	0.789184	0.449492	NC	1.89308	1.55339	1.53051	1.19082	U
56260	C8orf44	-0.932361	-0.943416	-0.40952	-0.420576	NC	0.178874	0.868687	0.701715	1.39153	NC	0.771221	0.421396	0.0814083	-0.268417	NC	1.88246	1.53263	1.89351	1.54369	U
56651	LINC00470	-0.541894	-1.20309	0.0430687	-0.618129	NC	0.177998	0.862496	0.762961	1.44746	NC	0.934112	-0.0794345	0.249614	-0.763933	NC	1.654	0.640458	2.3152	1.30166	U
56931	DUS3L	0.14288	-0.124404	0.0553361	-0.211948	NC	-1.15399	-0.902763	-1.24154	-0.990307	NC	-0.172419	0.0197945	-0.423651	-0.231438	NC	-1.46929	-1.27708	-1.20201	-1.0098	D
57106	NAT14	-0.111475	-0.143806	0.727671	0.69534	NC	-0.393011	-1.24101	0.446135	-0.401862	NC	-0.919698	-1.1375	-0.0717015	-0.289507	NC	-1.20123	-1.41904	-1.1689	-1.38671	D
57532	NUFIP2	0.0226458	-0.00762828	-0.379016	-0.40929	NC	1.51714	0.76615	1.11548	0.364489	NC	-0.195781	-0.0873175	0.555207	0.663671	NC	1.29871	1.40718	1.32899	1.43745	U
57567	ZNF319	1.0299	0.515328	1.18948	0.674905	NC	-0.646691	-0.658566	-0.487115	-0.498989	NC	0.239188	-0.0852473	0.251062	-0.0733732	NC	-1.43741	-1.76184	-0.922832	-1.24727	D
57669	EPB41L5	-0.245307	-0.355095	-0.510525	-0.620314	NC	1.08406	0.598885	0.818846	0.333666	NC	0.0208823	0.0770905	0.506062	0.56227	NC	1.35025	1.40646	1.46004	1.51625	U
57799	RAB40C	0.157541	0.0315992	0.150831	0.024889	NC	-0.99329	-1.09738	-1	-1.10409	NC	-0.239791	-0.658787	-0.135706	-0.554701	NC	-1.39062	-1.80962	-1.26468	-1.68368	D
5793	PTPRG	0.727658	0.443743	-0.383889	-0.667804	NC	1.38279	0.00924808	0.271241	-1.1023	NC	0.350462	0.560444	1.724	1.93398	NR	1.00559	1.21557	1.28951	1.49949	U
58486	ZBED5	-0.171785	0.160899	0.051158	0.383843	NC	-0.155128	-0.962483	0.0678154	-0.73954	NC	-1.23967	-1.01108	-0.432315	-0.203729	NC	-1.22301	-0.994426	-1.5557	-1.32711	D
58492	ZNF77	-0.420662	-0.0398403	-0.321928	0.0588937	NC	0.437319	0.533534	0.536053	0.632268	NC	0.361188	0.785875	0.264972	0.68966	NC	1.21917	1.64386	0.838347	1.26303	U
5863	RGL2	0.719892	0.644341	0.19475	0.119199	NC	1.02999	1.0374	0.504852	0.512255	NC	0.896961	0.817497	0.889559	0.810095	NC	1.20706	1.1276	1.28262	1.20315	U
59274	MESDC1	0.206247	0.383533	0.132552	0.309839	NC	-0.349782	-0.8692	-0.423476	-0.942894	NC	-0.662531	-0.469886	-0.143113	0.0495316	NC	-1.21856	-1.02591	-1.39585	-1.2032	D
6015	RING1	0.150243	0.00585273	0.163499	0.0191088	NC	-1.00588	-0.636453	-0.99262	-0.623197	NC	-0.243151	-0.746813	-0.612575	-1.11624	NC	-1.39927	-1.90293	-1.25488	-1.75854	D
60370	AVPI1	0.0871488	0.107394	0.248179	0.268424	NC	-0.843337	-0.977752	-0.682307	-0.816722	NC	-0.600092	-0.572158	-0.465678	-0.437743	NC	-1.53058	-1.50264	-1.55082	-1.52289	D
60626	RIC8A	0.211885	0.223486	0.353917	0.365517	NC	-0.854135	-1.26807	-0.712104	-1.12604	NC	-0.450398	-0.419218	-0.0364583	-0.00527816	NC	-1.51642	-1.48524	-1.52802	-1.49684	D
60677	CELF6	0.832273	0.832273	-0.269607	-0.269607	NC	1.41063	0.549339	0.308753	-0.552541	NC	0.911296	0.674759	1.77259	1.53605	NR	1.48966	1.25312	1.48966	1.25312	U
6249	CLIP1	1.0113	0.955914	0.647747	0.592358	NC	-0.801201	-0.880732	-1.16476	-1.24429	NC	0.459901	0.572875	0.539432	0.652407	NC	-1.3526	-1.23963	-1.29721	-1.18424	D
6263	RYR3	-0.275634	-1.06413	-0.706269	-1.49476	NC	1.09115	0.646363	0.660514	0.215729	NC	0.924449	0.0857299	1.36923	0.530515	NC	2.29123	1.45251	3.07973	2.24101	U
6398	SECTM1	1.13797	0.90038	1.23843	1.00084	NC	0.0750217	-0.303676	0.175484	-0.203214	NC	-0.885326	-0.770167	-0.506628	-0.391469	NC	-1.94827	-1.83311	-1.71068	-1.59553	D
641364	SLC7A11-AS1	-1.19265	0.392317	-2.74723	-1.16227	NC	0.906891	2.50779	-0.647698	0.953206	NC	0.793549	1.28293	-0.807355	-0.31797	NC	2.89308	3.38247	1.30812	1.79751	U
64147	KIF9	-0.473931	-1.12029	-0.544321	-1.19068	NC	0.464668	0.799087	0.394279	0.728698	NC	0.359081	0	0.0246621	-0.334419	NC	1.29768	0.938599	1.94404	1.58496	U
64426	SUDS3	-0.00920383	0.0737712	-0.102457	-0.0194815	NC	-0.201519	-0.483135	-0.294772	-0.576388	NC	-1.06197	-0.94565	-0.780358	-0.664034	NC	-1.25429	-1.13797	-1.33726	-1.22094	D
644919	LOC644919	-0.678072	-0.626269	-0.764622	-0.71282	NC	0.311028	0.81178	0.224478	0.72523	NC	0.657608	0.484086	0.156855	-0.0166659	NC	1.64671	1.47319	1.59491	1.42138	U
645513	LOC645513	0.0703893	-0.152003	-0.179225	-0.401617	NC	0.98388	0.513771	0.734266	0.264158	NC	0.748268	1.01411	1.21838	1.48422	NR	1.66176	1.92761	1.88415	2.15	U
646450	ARIH2OS	-0.583133	-0.697239	0.345432	0.231326	NC	0.185303	0.582519	1.11387	1.51108	NC	0.503258	0.324502	0.106042	-0.0727142	NC	1.27169	1.09294	1.3858	1.20704	U
646719	NIPBL-AS1	-0.60921	-0.352302	-0.739409	-0.4825	NC	1.1006	0.874469	0.970405	0.74427	NC	0.18233	0.159087	0.408465	0.385222	NC	1.89214	1.8689	1.63524	1.61199	U
64769	MEAF6	-0.131825	0.0953302	-0.109299	0.117857	NC	-1.12295	-1.10317	-1.10042	-1.08064	NC	-0.0796015	-0.334708	-0.0993798	-0.354486	NC	-1.07072	-1.32583	-1.29788	-1.55298	D
64770	CCDC14	-1.0416	-0.653675	-0.996158	-0.608232	NC	0.551015	0.813201	0.596458	0.858644	NC	0.0202132	0.480329	-0.241973	0.218143	NC	1.61283	2.07295	1.2249	1.68502	U
6483	ST3GAL2	0.350558	0.206041	0.366021	0.221504	NC	-1.05327	-1.00926	-1.0378	-0.993795	NC	0.037802	0.162815	-0.00620515	0.118807	NC	-1.36602	-1.24101	-1.2215	-1.09649	D
64901	RANBP17	-0.254317	-0.0146468	-1.14852	-0.908852	NC	1.07108	0.970556	0.176878	0.0763509	NC	0.218424	0.182203	0.31895	0.28273	NC	1.54382	1.5076	1.30415	1.26793	U
64969	MRPS5	-0.25541	-0.165408	0.161772	0.251774	NC	-1.15595	-1.27124	-0.738773	-0.854062	NC	-0.398549	-0.217626	-0.283261	-0.102338	NC	-1.29909	-1.11817	-1.3891	-1.20817	D
650293	LOC650293	-0.805827	-1.03715	-0.805827	-1.03715	NC	1.12579	-1.08823	1.12579	-1.08823	NC	-0.884307	-0.346651	1.32971	1.86736	NR	1.04731	1.58496	1.27863	1.81629	U
65057	ACD	0.39729	0.369312	0.482474	0.454496	NC	-0.752457	-1.18398	-0.667273	-1.0988	NC	-0.146549	-0.482152	0.284977	-0.0506261	NC	-1.2963	-1.6319	-1.26832	-1.60392	D
6521	SLC4A1	-0.807355	-0.540568	0.415037	0.681824	NC	-0.283793	0.850857	0.938599	2.07325	NC	1.70526	1.31564	0.570607	0.180992	NR	2.22882	1.8392	1.96203	1.57242	U
6522	SLC4A2	0.501316	0.0994568	0.428618	0.0267586	NC	-0.619396	-0.671224	-0.692094	-0.743922	NC	-0.657672	-0.70579	-0.605844	-0.653963	NC	-1.77838	-1.8265	-1.37652	-1.42464	D
653479	MRPL45P2	-1.5656	-0.899598	-0.578536	0.0874628	NC	-0.351472	0.136321	0.635589	1.12338	NC	0.945074	1.13826	0.45728	0.650463	NC	2.1592	2.35238	1.4932	1.68638	U
654466	KGFLP2	-0.866733	0.175087	-0.819428	0.222392	NC	0.718229	1.02308	0.765535	1.07039	NC	1.23447	0.594361	0.929611	0.289507	NC	2.81943	2.17932	1.77761	1.1375	U
65993	MRPS34	-0.120643	-0.206407	0.156208	0.0704444	NC	-0.594447	-0.739323	-0.317596	-0.462472	NC	-0.74845	-0.812338	-0.603574	-0.667462	NC	-1.22225	-1.28614	-1.13649	-1.20038	D
662	BNIP1	-0.0507034	-0.332254	0.537512	0.255961	NC	-1.53389	-0.940587	-0.945673	-0.352371	NC	0.160134	-0.607085	-0.433167	-1.20039	NC	-1.32305	-2.09027	-1.0415	-1.80872	D
6632	SNRPD1	-0.0500577	0.279342	0.0769209	0.40632	NC	-1.18447	-1.17246	-1.05749	-1.04548	NC	-0.135532	0.182055	-0.14754	0.170046	NC	-1.26994	-0.952356	-1.59934	-1.28176	D
6642	SNX1	-0.257909	-0.109287	-0.242424	-0.0938015	NC	1.1579	0.755838	1.17338	0.771323	NC	-0.0479578	-0.146389	0.3541	0.255668	NC	1.36785	1.26942	1.21922	1.12079	U
6668	SP2	0.311586	0.0409203	-0.0807313	-0.351397	NC	-0.55732	-1.1193	-0.949637	-1.51162	NC	-0.445546	-0.850105	0.116434	-0.288125	NC	-1.31445	-1.71901	-1.04379	-1.44834	D
6675	UAP1	0.992873	1.10922	0.862839	0.979187	NC	-0.223874	-0.206679	-0.353908	-0.336712	NC	-0.66535	0.00529515	-0.682546	-0.0119005	NC	-1.8821	-1.21145	-1.99844	-1.3278	D
6793	STK10	-0.383819	-0.431664	-0.41283	-0.460675	NC	-0.421061	-0.899863	-0.450072	-0.928874	NC	-1.17295	-1.59253	-0.694144	-1.11373	NC	-1.21019	-1.62977	-1.16234	-1.58193	D
6913	TBX15	-0.691878	-0.584963	-0.106915	0	NC	0.308122	1.19265	0.893085	1.77761	NC	1.02748	0.657112	0.142958	-0.22741	NC	2.02748	1.65711	1.92057	1.5502	U
7011	TEP1	0.930098	-1.03953	-0.849133	-2.81876	NC	1.92497	1.1304	0.145742	-0.648835	NC	0.885164	0.262178	1.67974	1.05675	NC	1.88004	1.25705	3.84967	3.22668	U
7071	KLF10	1.24482	1.17647	1.05563	0.987279	NC	0.0445083	-0.932543	-0.14468	-1.12173	NC	-0.499865	-0.262304	0.477187	0.714748	NC	-1.70017	-1.46261	-1.63182	-1.39426	D
7074	TIAM1	0.86953	0.665817	0.302761	0.0990474	NC	1.75207	1.00541	1.1853	0.438644	NC	0.416647	0.530267	1.16331	1.27693	NC	1.29919	1.41281	1.5029	1.61652	U
7101	NR2E1	-1.32193	-0.321928	-1	0	NC	0.378512	0.765535	0.70044	1.08746	NC	0.758992	0.884523	0.371969	0.4975	NC	2.45943	2.58496	1.45943	1.58496	U
7268	TTC4	0.269718	0.345205	0.0997932	0.17528	NC	-1.12237	-0.881184	-1.2923	-1.05111	NC	-0.455004	0.135352	-0.696194	-0.105838	NC	-1.8471	-1.25674	-1.92258	-1.33223	D
728116	ZBTB8B	-1.58496	-0.584963	-1	0	NC	0.415037	-1.58496	1	-1	NC	-0.263034	0.584963	1.73697	2.58496	NR	1.73697	2.58496	0.736966	1.58496	U
728407	PARGP1	-1.14775	-0.26559	-1.42561	-0.543443	NC	0.267284	-0.516398	-0.0105692	-0.794251	NC	0.482393	0.889817	1.26607	1.6735	NR	1.89743	2.30485	1.01527	1.42269	U
728963	RPS15AP10	-0.7022	-1.18763	0.17638	-0.309047	NC	0.2978	1.09366	1.17638	1.97224	NC	0.146841	0.581141	-0.649018	-0.214718	NC	1.14684	1.58114	1.63227	2.06657	U
729083	LOC729083	-1.00477	-0.592122	-0.1453	0.267347	NC	0.978413	0.311415	1.83788	1.17088	NC	0.947085	-0.00484126	1.61408	0.662157	NC	2.93027	1.97834	2.51762	1.56569	U
729975	LINC01530	-0.540568	-0.597902	-0.501398	-0.558731	NC	0.76033	1.12928	0.7995	1.16845	NC	-0.0263113	-0.14142	-0.395265	-0.510373	NC	1.27459	1.15948	1.33192	1.21681	U
730668	LOC730668	-0.633872	-1.49185	0.157541	-0.70044	NC	-0.791413	0.263034	0	1.05445	NC	1.79141	1	0.736966	-0.0544478	NC	1.63387	0.842459	2.49185	1.70044	U
7482	WNT2B	-1.75743	-0.626185	-1.16227	-0.0310269	NC	0.389412	0.293196	0.98457	0.888355	NC	0.268196	-0.0473057	0.364411	0.0489096	NC	2.41504	2.09954	1.28379	0.968291	U
7503	XIST	0.842141	0.492334	-0.255055	-0.604862	NC	1.83378	1.04217	0.73658	-0.0550226	NC	0.656908	0.442687	1.44851	1.23429	NR	1.64854	1.43432	1.99835	1.78413	U
7518	XRCC4	1.16851	1.05019	0.79886	0.68054	NC	0.037802	0.880261	-0.331844	0.510615	NC	-0.103093	-0.415037	-0.945552	-1.2575	NC	-1.2338	-1.54574	-1.11548	-1.42742	D
7576	ZNF28	-0.900685	-1.17991	-1.0276	-1.30682	NC	0.492516	0.415037	0.365604	0.288125	NC	-0.122962	0.181404	-0.0454828	0.258883	NC	1.27024	1.57461	1.54946	1.85383	U
7743	ZNF189	-0.0766213	0.633872	-0.447459	0.263034	NC	1.1973	0.756729	0.826464	0.385891	NC	0.305199	0.802699	0.745771	1.24327	NC	1.57912	2.07662	0.868628	1.36613	U
78989	COLEC11	0.241008	-0.652077	-0.387023	-1.28011	NC	0.89812	0.669851	0.270089	0.0418202	NC	0.871267	0.792195	1.09954	1.02046	NC	1.52838	1.44931	2.42146	2.34239	U
79008	SLX1B	-0.243619	-0.2028	-0.00529819	0.0355207	NC	0.9892	0.956768	1.22752	1.19509	NC	0.139391	0.120818	0.171823	0.15325	NC	1.37221	1.35364	1.33139	1.31282	U
79038	ZFYVE21	-0.308505	-0.216284	-0.330149	-0.237928	NC	-1.0961	-1.12084	-1.11774	-1.14249	NC	-0.454839	-0.516678	-0.430092	-0.491931	NC	-1.24243	-1.30427	-1.33465	-1.39649	D
79411	GLB1L	-0.425091	-0.857042	-0.171046	-0.602996	NC	1.05166	0.890771	1.30571	1.14482	NC	-0.120925	-0.451749	0.0399664	-0.290858	NC	1.35583	1.025	1.78778	1.45695	U
79583	TMEM231	-0.176665	-0.728838	-0.342781	-0.894954	NC	0.612412	0.612412	0.446296	0.446296	NC	0.251795	0.419031	0.251795	0.419031	NC	1.04087	1.20811	1.59304	1.76028	U
79690	GAL3ST4	-0.528549	-0.956411	-0.597674	-1.02554	NC	0.102483	1.03065	0.0333586	0.961526	NC	1.31697	0.763108	0.388806	-0.165059	NC	1.94801	1.39414	2.37587	1.822	U
79696	ZC2HC1C	-1	-0.871676	-0.456378	-0.328054	NC	0.983126	0.0166787	1.52675	0.5603	NC	0.332076	-0.708951	1.29852	0.257496	NC	2.3152	1.27417	2.18688	1.14585	U
79725	THAP9	-0.561879	-0.199309	-0.695145	-0.332575	NC	1.29373	0.878694	1.16046	0.745427	NC	-0.160465	-0.0981804	0.254573	0.316857	NC	1.69515	1.75743	1.33258	1.39486	U
79818	ZNF552	-0.287577	-0.108253	-0.22542	-0.0460964	NC	0.767068	1.09257	0.829224	1.15472	NC	0.404787	0.199968	0.0792889	-0.125531	NC	1.45943	1.25461	1.28011	1.07529	U
79862	ZNF669	-0.630562	-0.512227	-0.364743	-0.246408	NC	0.878028	1.06611	1.14385	1.33193	NC	0.234431	0.0938832	0.0463509	-0.0941968	NC	1.74302	1.60247	1.62469	1.48414	U
79946	C10orf95	-0.302184	0.450107	-0.556673	0.195618	NC	0.534877	0.565904	0.280388	0.311415	NC	0.952171	1.15943	0.921145	1.12841	NC	1.78923	1.99649	1.03694	1.2442	U
79970	ZNF767P	0.40576	-0.263034	-0.695419	-1.36421	NC	1.37281	0.917538	0.27163	-0.183641	NC	0.168337	0.262638	0.623608	0.717909	NC	1.13539	1.22969	1.80418	1.89848	U
80063	ATF7IP2	-0.634604	-0.526748	-0.664005	-0.556149	NC	1.06634	0.950359	1.03694	0.920958	NC	0.317057	0.231626	0.433041	0.34761	NC	2.018	1.93257	1.91015	1.82472	U
80149	ZC3H12A	0.980822	0.863981	1.01944	0.902595	NC	-0.474362	-1.02475	-0.435748	-0.986137	NC	-0.149215	-0.149215	0.401175	0.401175	NC	-1.6044	-1.6044	-1.48756	-1.48756	D
80198	MUS81	0.233102	0.40658	0.0794136	0.252891	NC	-0.735237	-0.7138	-0.888925	-0.867488	NC	-0.40929	-0.259583	-0.430727	-0.28102	NC	-1.37763	-1.22792	-1.55111	-1.4014	D
80223	RAB11FIP1	-0.283793	-0.209923	-0.309328	-0.235458	NC	1.06609	0.587822	1.04055	0.562287	NC	-0.145524	0.0244013	0.332743	0.502668	NC	1.20436	1.37428	1.13049	1.30041	U
80776	B9D2	0.28903	0.135117	0.814889	0.660976	NC	-0.984347	-1.43086	-0.458488	-0.905003	NC	-0.26096	0.030806	0.185556	0.477322	NC	-1.53434	-1.24257	-1.38042	-1.08866	D
80864	EGFL8	-0.746813	-0.68871	0.735868	0.793971	NC	-1.06627	-0.888605	0.416408	0.594076	NC	-0.923946	-0.833275	-1.10161	-1.01094	NC	-1.24341	-1.15274	-1.30151	-1.21084	D
81027	TUBB1	-0.964376	-0.736966	-0.851901	-0.624491	NC	-0.0365259	0.104337	0.0759489	0.216811	NC	0.547488	0.645335	0.406625	0.504473	NC	1.47534	1.57319	1.24793	1.34577	U
8139	GAN	-0.0815299	-0.31797	-1.10512	-1.34156	NC	0.547488	0.26039	-0.476099	-0.763197	NC	0.771266	0.898914	1.05836	1.18601	NC	1.40028	1.52793	1.63672	1.76437	U
81608	FIP1L1	0.144517	0.117732	0.0157673	-0.0110177	NC	-0.943775	-0.919613	-1.07253	-1.04836	NC	-0.395929	-0.19613	-0.420091	-0.220292	NC	-1.48422	-1.28442	-1.45744	-1.25764	D
81786	TRIM7	-0.0897637	-0.21226	-0.189419	-0.311915	NC	-1.18753	-0.998207	-1.28718	-1.09786	NC	-0.739011	-0.51224	-0.928331	-0.70156	NC	-1.83677	-1.61	-1.71428	-1.48751	D
8312	AXIN1	0.225198	0.0625057	1.19601	1.03332	NC	-0.294429	-0.460292	0.676386	0.510523	NC	-1.22803	-1.03538	-1.06216	-0.86952	NC	-1.74765	-1.55501	-1.58496	-1.39232	D
83481	EPPK1	0.0860398	-0.864207	-0.562001	-1.51225	NC	1.68903	0.776712	1.04099	0.128671	NC	-0.349477	-0.36388	0.56284	0.548437	NC	1.25351	1.23911	2.20376	2.18936	U
84056	KATNAL1	0.0720297	0.252326	-0.176157	0.00413973	NC	-1.09672	-0.393857	-1.34491	-0.642044	NC	0.020909	-0.370112	-0.681959	-1.07298	NC	-1.14785	-1.53887	-1.32814	-1.71916	D
84060	RBM48	-0.38521	-0.153314	-0.13236	0.0995357	NC	0.728291	0.667716	0.981141	0.920566	NC	0.468034	0.217639	0.52861	0.278214	NC	1.58154	1.33114	1.34964	1.09924	U
84310	C7orf50	0.28285	0.579966	0.0711854	0.368302	NC	-0.390888	-0.219169	-0.602552	-0.430833	NC	-0.710284	-0.58554	-0.882003	-0.757259	NC	-1.38402	-1.25928	-1.68114	-1.55639	D
84320	ACBD6	-0.359772	-0.252911	-0.236427	-0.129566	NC	-0.922795	-1.03153	-0.79945	-0.908185	NC	-1.06331	-0.69006	-0.954576	-0.581324	NC	-1.62633	-1.25308	-1.7332	-1.35994	D
84440	RAB11FIP4	-0.723482	-1.02046	-0.733607	-1.03059	NC	0.44271	0.994911	0.432586	0.984787	NC	0.240433	0.0799683	-0.311768	-0.472233	NC	1.40663	1.24616	1.70361	1.54314	U
84448	ABLIM2	1.08453	1.09544	1.09285	1.10375	NC	-0.0557878	-0.245235	-0.0474725	-0.23692	NC	-0.898512	-0.95754	-0.709065	-0.768092	NC	-2.03883	-2.09786	-2.04974	-2.10877	D
8451	CUL4A	0.0746322	0.0939975	-0.216166	-0.196801	NC	-0.770518	-0.832446	-1.06132	-1.12324	NC	-0.556948	-0.364303	-0.49502	-0.302375	NC	-1.4021	-1.20945	-1.42146	-1.22882	D
84541	KBTBD8	-0.703018	0.0204641	-1.12832	-0.404842	NC	1.47805	0.989658	1.05274	0.564352	NC	-0.156119	0.187086	0.33227	0.675475	NC	2.02495	2.36815	1.30146	1.64467	U
84662	GLIS2	0.499062	-0.140007	0.685763	0.0466932	NC	-0.627273	-1.09478	-0.440573	-0.908078	NC	-0.961865	-0.559427	-0.49436	-0.0919225	NC	-2.0882	-1.68576	-1.44913	-1.04669	D
84696	ABHD1	-0.166358	0.375212	1.09954	1.64111	NC	-0.916744	-1.31836	0.34915	-0.0524674	NC	-0.551642	-3.74147	-0.150025	-3.33985	NR	-1.30203	-4.49185	-1.8436	-5.03342	D
8470	SORBS2	-0.906891	-0.0995357	-1.32193	-0.514573	NC	1.22239	0.485427	0.807355	0.0703893	NC	-0.374396	0.36257	0.36257	1.09954	NC	1.75489	2.49185	0.947533	1.6845	U
8473	OGT	-0.0843051	-0.227822	-0.37014	-0.513656	NC	0.937552	0.948513	0.651717	0.662679	NC	0.110414	0.288792	0.0994525	0.27783	NC	1.13227	1.31065	1.27579	1.45417	U
84759	PCGF1	0.741695	0.842723	0.678895	0.779922	NC	-1.10621	-0.953385	-1.16901	-1.01619	NC	0.104681	0.167547	-0.0481444	0.0147215	NC	-1.74322	-1.68036	-1.84425	-1.78139	D
84765	ZNF577	-1.12199	-0.776494	-0.27711	0.068387	NC	0.256521	0.534708	1.1014	1.37959	NC	0.625725	0.543014	0.347539	0.264828	NC	2.00424	1.92153	1.65874	1.57603	U
84811	BUD13	0.229892	0.261227	0.298038	0.329374	NC	-0.886906	-0.867007	-0.81876	-0.79886	NC	-0.280312	-0.0885367	-0.300212	-0.108436	NC	-1.39711	-1.20533	-1.42845	-1.23667	D
84837	ARHGAP5-AS1	-0.387023	0.47478	0.100527	0.96233	NC	-1.13327	-0.897638	-0.645717	-0.410088	NC	0.0230836	-0.668794	-0.212545	-0.904422	NC	-0.72316	-1.41504	-1.58496	-2.27684	D
84851	TRIM52	0.343008	0.176157	0.0248319	-0.142019	NC	1.49698	1.08194	1.1788	0.763766	NC	0.536968	0.512359	0.952006	0.927396	NC	1.69094	1.66633	1.85779	1.83318	U
84934	RITA1	0.00510087	-0.0739707	-0.0140752	-0.0931468	NC	-0.856881	-0.991509	-0.876057	-1.01068	NC	-0.89971	-0.585477	-0.765083	-0.45085	NC	-1.76169	-1.44746	-1.68262	-1.36839	D
84957	RELT	0.00578235	-0.30895	-0.124328	-0.439061	NC	1.10069	0.914979	0.970584	0.784869	NC	0.170525	0.104211	0.35624	0.289926	NC	1.26544	1.19912	1.58017	1.51386	U
84983	FAM222A-AS1	-1.62385	-1.03103	-0.850622	-0.257798	NC	0.66458	0.213595	1.43781	0.986825	NC	-0.431266	-0.933766	0.0197182	-0.482782	NC	1.85717	1.35466	1.26434	0.76184	U
85407	NKD1	-1.42321	-0.838249	-0.750022	-0.165059	NC	0.0715533	0.225881	0.744743	0.899071	NC	0.385654	-0.146841	0.231326	-0.30117	NC	1.88042	1.34792	1.29546	0.762961	U
8555	CDC14B	0.411898	0.288936	0.418184	0.295223	NC	-0.685619	-1.10402	-0.679332	-1.09774	NC	-0.459432	-0.126448	-0.0410273	0.291956	NC	-1.55695	-1.22396	-1.43399	-1.101	D
8643	PTCH2	-1.01089	-0.905535	-0.471306	-0.365953	NC	0.487749	0.972624	1.02733	1.51221	NC	0.536453	-0.10424	0.0515788	-0.589114	NC	2.03509	1.3944	1.92974	1.28904	U
8717	TRADD	0.0318323	0.191224	0.0299403	0.189332	NC	-0.772747	0.262403	-0.774639	0.260511	NC	-0.681959	-0.713437	-1.71711	-1.74859	NR	-1.48654	-1.51802	-1.64593	-1.67741	D
8833	GMPS	0.00497589	0.167743	-0.135329	0.0274381	NC	-0.855744	-1.15058	-0.996048	-1.29089	NC	-0.409972	-0.222017	-0.115131	0.0728244	NC	-1.27069	-1.08274	-1.43346	-1.2455	D
8851	CDK5R1	-0.0924075	-0.622299	-0.537407	-1.0673	NC	1.03896	0.612774	0.593959	0.167775	NC	0.362855	-0.131367	0.789039	0.294818	NC	1.49422	1	2.02411	1.52989	U
90011	KIR3DX1	-0.959358	-0.462526	-1.06274	-0.565904	NC	0.698536	1.1487	0.595158	1.04532	NC	0.0499252	-0.254929	-0.40024	-0.705095	NC	1.70782	1.40296	1.21099	0.906133	U
9019	MPZL1	0.0696494	0.025318	0.112407	0.0680755	NC	-0.649446	-0.953111	-0.606688	-0.910353	NC	-0.691433	-0.666307	-0.387768	-0.362643	NC	-1.41053	-1.3854	-1.3662	-1.34107	D
90199	WFDC8	-0.392121	-0.311727	-0.883834	-0.80344	NC	0.820792	1.55526	0.329079	1.06355	NC	0.496087	0.311548	-0.23838	-0.422919	NC	1.709	1.52446	1.62861	1.44407	U
9056	SLC7A7	-0.347923	-0.559427	0.371969	0.160465	NC	1.14684	0.478047	1.86673	1.19794	NC	-0.186012	-0.384341	0.482782	0.284453	NC	1.30875	1.11042	1.52026	1.32193	U
9166	EBAG9	0.692756	0.659271	0.685395	0.65191	NC	-0.680287	-0.60821	-0.687648	-0.61557	NC	-0.0511541	0.0776913	-0.123232	0.00561361	NC	-1.4242	-1.29535	-1.39071	-1.26187	D
91948	LINC00923	-0.249294	-0.70044	-0.0827506	-0.533897	NC	1.18701	0.846151	1.35355	1.01269	NC	0.428218	-0.00268909	0.769076	0.338169	NC	1.86452	1.43361	2.31567	1.88476	U
9203	ZMYM3	1.00456	1.07343	0.903198	0.972069	NC	-0.819965	-1.07496	-0.921326	-1.17632	NC	0.0239789	-0.303907	0.278976	-0.0489096	NC	-1.80054	-2.12843	-1.86942	-2.1973	D
9277	WDR46	-0.485573	-0.477394	-0.389434	-0.381254	NC	-1.1302	-1.10951	-1.03406	-1.01337	NC	-0.592194	-0.551686	-0.612884	-0.572376	NC	-1.23682	-1.19631	-1.245	-1.20449	D
92979	2019-03-09	0.452859	0.638074	0.197358	0.382573	NC	-0.229171	-0.692571	-0.484672	-0.948072	NC	-0.545863	-0.744029	-0.0824622	-0.280628	NC	-1.22789	-1.42606	-1.41311	-1.61127	D
93233	CCDC114	-0.463947	-0.0365259	-0.814444	-0.387023	NC	0.925999	1.20163	0.575502	0.851137	NC	0.178337	0.275634	-0.0972972	0	NC	1.56828	1.66558	1.14086	1.23816	U
9398	CD101	-0.280108	-0.332575	-1.07529	-1.12776	NC	1.25239	0.4975	0.457207	-0.297681	NC	-0.111031	0.671377	0.643856	1.42626	NC	1.42146	2.20387	1.47393	2.25634	U
9468	PCYT1B	-0.802963	-0.931287	-0.635236	-0.76356	NC	0	0.719264	0.167727	0.886991	NC	0.937069	0.487938	0.217805	-0.231326	NC	1.74003	1.2909	1.86836	1.41923	U
9572	NR1D1	0.841056	0.825426	0.535128	0.519499	NC	-0.968522	-0.790547	-1.27445	-1.09647	NC	0.546395	0.422156	0.36842	0.24418	NC	-1.26318	-1.38742	-1.24755	-1.37179	D
9656	MDC1	0.936256	0.643289	0.626282	0.333315	NC	-0.387896	-1.15232	-0.69787	-1.46229	NC	0.100277	-0.181562	0.8647	0.582861	NC	-1.22387	-1.50571	-0.930907	-1.21275	D
9668	ZNF432	-1.12125	-0.941484	-0.65394	-0.474173	NC	0.554254	0.521784	1.02157	0.989095	NC	0.436285	0.428354	0.468755	0.460824	NC	2.11179	2.10386	1.93202	1.92409	U
9687	GREB1	-0.908965	-0.983512	-0.458488	-0.533035	NC	0.0701261	0.68634	0.520603	1.13682	NC	0.349051	0.205749	-0.267162	-0.410465	NC	1.32814	1.18484	1.40269	1.25939	U
9726	ZNF646	0.0810716	-0.686435	-0.432667	-1.20017	NC	1.50642	0.556894	0.99268	0.0431546	NC	-0.18616	-0.433253	0.763366	0.516273	NC	1.23919	0.992095	2.00669	1.7596	U
9751	SNPH	1.04182	-0.110183	1.06319	-0.0888093	NC	-0.415037	-1	-0.393664	-0.978626	NC	-1.08746	-1.4245	-0.5025	-0.839535	NC	-2.54432	-2.88136	-1.39232	-1.72935	D
9755	TBKBP1	0.850253	0.644669	0.356144	0.15056	NC	0.0790716	-0.316857	-0.415037	-0.810966	NC	-0.871267	-1.70526	-0.475338	-1.30933	NR	-1.64245	-2.47644	-1.43686	-2.27085	D
9761	MLEC	-0.792716	-0.978821	-0.86377	-1.04988	NC	0.621525	0.417427	0.55047	0.346372	NC	-0.198601	-0.131586	0.00549808	0.0725125	NC	1.21564	1.28265	1.40175	1.46876	U
9817	KEAP1	0.179786	-0.00190959	0.375706	0.194011	NC	-0.988595	-1.17854	-0.792675	-0.982618	NC	-0.581181	-0.114216	-0.391238	0.0757273	NC	-1.74956	-1.2826	-1.56787	-1.1009	D
9941	EXOG	0.641546	0	1.51602	0.874469	NC	-0.423808	-0.402848	0.450661	0.471621	NC	-2.67948	-0.624198	-2.70044	-0.645157	NR	-3.74483	-1.68955	-3.10329	-1.04801	D
NM_001306215	-	0.374124	-0.0482552	0.2645	-0.15788	NC	-1.03847	-1.0581	-1.1481	-1.16773	NC	-0.32681	-0.302563	-0.307182	-0.282934	NC	-1.73941	-1.71516	-1.31703	-1.29278	D
NM_001308031	-	-0.0374747	-0.358048	-0.761701	-1.08227	NC	0.391059	0.251539	-0.333168	-0.472688	NC	0.713401	0.840365	0.852921	0.979885	NC	1.14193	1.2689	1.46251	1.58947	U
NM_001316960	-	-1.40808	-0.331543	-1.17403	-0.0974878	NC	-0.185692	1.00348	0.048363	1.23754	NC	1.32193	0.489385	0.132755	-0.699788	NC	2.54432	1.71178	1.46778	0.635236	U
NM_001316978	-	-1.37102	-0.891553	-0.936185	-0.456716	NC	0.628977	-0.0546541	1.06382	0.380184	NC	-0.0280144	-0.0783879	0.655617	0.605244	NC	1.97199	1.92161	1.49252	1.44214	U
NM_001317000	-	-0.216811	-1.42626	0.121991	-1.08746	NC	0.456378	0.983126	0.79518	1.32193	NC	0.60921	-0.127756	0.0824622	-0.654503	NC	1.2824	0.545434	2.49185	1.75489	U
NM_001318896	-	-0.70044	0.604071	-0.372952	0.931559	NC	-0.499852	-0.530515	-0.172364	-0.203027	NC	-1.03709	-2.68121	-1.00643	-2.65055	NR	-0.836501	-2.48063	-2.14101	-3.78514	D
NM_001318966	-	-0.240219	0.372659	0.723363	1.33624	NC	-0.525461	-0.838052	0.438121	0.125531	NC	-1.32819	-1.04439	-1.0156	-0.731804	NC	-1.61343	-1.32964	-2.22631	-1.94251	D
NM_001319187	-	-0.234953	0.135495	0.151174	0.521622	NC	-0.967931	-1.48476	-0.581804	-1.09863	NC	-0.401681	-0.774813	0.115148	-0.257984	NC	-1.13466	-1.50779	-1.50511	-1.87824	D
NM_001320445	-	1.16316	1.18583	0.46247	0.485146	NC	0.8921	-0.642058	0.191414	-1.34274	NC	-1.71473	-2.08703	-0.180572	-0.552874	NR	-1.98579	-2.35809	-2.00846	-2.38076	D
NM_001320497	-	-0.837729	0.826851	-0.702799	0.961781	NC	-0.65085	-1.12553	-0.515921	-0.990601	NC	-1.654	-1.45606	-1.17932	-0.981384	NR	-1.46713	-1.26919	-3.13171	-2.93377	D
NM_001320608	-	-0.635428	-0.0740006	-0.570887	-0.00946033	NC	-1.2134	0.0356239	-1.14886	0.100164	NC	-0.154328	-0.938599	-1.40336	-2.18763	NR	-0.732304	-1.51658	-1.29373	-2.078	D
NR_131238	-	-0.505891	-0.132939	-0.782409	-0.409456	NC	0.786891	1.13566	0.510373	0.859137	NC	0.55321	-0.060121	0.204446	-0.408885	NC	1.84599	1.23266	1.47304	0.859709	U
NR_134293	-	0.962719	-1.02975	0.634914	-1.35755	NC	1.08573	0.908852	0.757925	0.581047	NC	1.35484	0.494317	1.53172	0.671195	NR	1.47785	0.617328	3.47032	2.60979	U
NR_134456	-	-1.01436	-1.65821	-0.286881	-0.930737	NC	-0.549687	0.978413	0.177787	1.70589	NC	1.43063	1.36721	-0.0974658	-0.160891	NR	1.8953	1.83188	2.53916	2.47573	U
NR_134862	-	0.626098	1.52633	-0.225997	0.67423	NC	0.0142943	0.603315	-0.837801	-0.24878	NC	-9.47168	-0.250088	-10.0607	-0.839109	NR	-10.0835	-0.861892	-10.9837	-1.76212	D
NR_135128	-	-0.5025	-0.0430687	-0.624491	-0.165059	NC	1.02106	1.08246	0.899071	0.960472	NC	0.786293	1.0813	0.724893	1.0199	NC	2.30986	2.60486	1.85042	2.14543	U
100	ADA	-0.869762	-0.903038	-1.16627	-1.19954	NC	1.3388	1.12906	1.0423	0.832559	NC	-1.78766	-1.74274	-1.57792	-1.533	D	0.4209	0.465826	0.454176	0.499102	NC
100310846	ANKRD61	-1.04182	0.263034	0	1.30485	NC	-1.95936	-0.881356	-0.917538	0.160465	NC	2.078	2.9386	1	1.8606	U	1.16046	2.02106	-0.14439	0.716207	NC
10062	NR1H3	-0.987061	-0.785427	-0.862239	-0.660605	NC	0.513013	0.710205	0.637835	0.835027	NC	-1.16993	-1.37669	-1.36712	-1.57388	D	0.330149	0.123382	0.128515	-0.0782514	NC
10095	ARPC1B	0.58836	0.590324	0.683548	0.685511	NC	-0.170563	0.0509224	-0.0753752	0.14611	NC	1.31545	1.47672	1.09396	1.25524	U	0.556522	0.717798	0.554558	0.715835	NC
10217	CTDSPL	-0.951686	-0.894106	-0.630874	-0.573294	NC	-0.774675	-0.593923	-0.453864	-0.273111	NC	-1.18568	-1.35126	-1.36643	-1.53201	D	-1.00866	-1.17425	-1.06624	-1.23183	NC
102723703	LOC102723703	-1.04372	-1.04372	-0.532221	-0.532221	NC	0.343302	0.773115	0.854802	1.28461	NC	-0.966447	-1.365	-1.39626	-1.79481	D	0.420576	0.0220263	0.420576	0.0220263	NC
10346	TRIM22	-0.516495	-0.519246	-0.748461	-0.751212	NC	1.28338	1.09928	1.05142	0.867314	NC	-1.75657	-1.85306	-1.57246	-1.66896	D	0.0433112	-0.05318	0.0460618	-0.0504294	NC
10411	RAPGEF3	1.49957	1.14202	0.474909	0.117357	NC	1.09622	0.499571	0.0715533	-0.525091	NC	1.21573	1.06817	1.81237	1.66482	U	0.812373	0.664816	1.16993	1.02237	NC
10437	IFI30	-0.759541	-0.859685	-0.498992	-0.599136	NC	0.918222	0.978543	1.17877	1.23909	NC	-1.75883	-1.92114	-1.81915	-1.98146	D	-0.0810664	-0.243372	0.0190772	-0.143228	NC
10449	ACAA2	-1.09077	-0.944962	-0.723597	-0.577785	NC	-0.161384	-0.219579	0.205793	0.147597	NC	-1.29614	-1.88329	-1.23794	-1.82509	D	-0.366747	-0.953899	-0.512558	-1.09971	NC
10712	FAM189B	-0.754948	-0.968249	-0.735556	-0.948858	NC	0.519509	-0.273861	0.5389	-0.25447	NC	-1.78062	-2.10543	-0.987248	-1.31206	D	-0.506162	-0.830978	-0.29286	-0.617677	NC
10923	SUB1	0.369327	0.571108	0.575304	0.777084	NC	-1.03898	-0.771607	-0.833008	-0.565631	NC	1.51312	1.39448	1.24574	1.1271	U	0.104807	-0.0138301	-0.0969735	-0.215611	NC
10962	MLLT11	-0.89439	-0.292553	-0.814611	-0.212774	NC	1.17802	0.461091	1.2578	0.54087	NC	-2.11548	-1.56891	-1.39855	-0.851982	D	-0.0430687	0.503498	-0.644905	-0.0983379	NC
11270	NRM	-0.457806	-0.934577	-0.243755	-0.720526	NC	1.09183	0.795621	1.30588	1.00967	NC	-1.76397	-2.2039	-1.46776	-1.90769	D	-0.214329	-0.654267	0.262442	-0.177496	NC
113	ADCY7	0.71792	0.801713	0.505699	0.589492	NC	-0.0198448	-0.961111	-0.232065	-1.17333	NC	1.18363	1.61528	2.12489	2.55655	U	0.44586	0.877516	0.362067	0.793723	NC
1155	TBCB	-1.11329	-0.608325	-0.850738	-0.345775	NC	-0.0244176	0.241779	0.238133	0.50433	NC	-1.79475	-1.11302	-2.06094	-1.37921	D	-0.705875	-0.0241461	-1.21084	-0.529109	NC
115557	ARHGEF25	-1.78136	-0.571906	-1.02237	0.187086	NC	0.306103	0.750022	1.0651	1.50901	NC	-1.02137	-2.5025	-1.46529	-2.94642	D	1.06609	-0.415037	-0.143364	-1.62449	NC
1201	CLN3	-0.722734	-1.01618	-0.54427	-0.837716	NC	0.770574	0.788072	0.949038	0.966537	NC	-1.99529	-1.87625	-2.01279	-1.89375	D	-0.501984	-0.382944	-0.208538	-0.0894982	NC
126969	SLC44A3	-0.574516	0.0655883	-0.834751	-0.194647	NC	0.584963	0.450252	0.324727	0.190016	NC	-1.22332	-1.3746	-1.08861	-1.23989	D	-0.0638465	-0.215124	-0.703951	-0.855228	NC
145282	MIPOL1	0.459432	0.650254	0.153623	0.344446	NC	-0.884523	-1.16993	-1.19033	-1.47573	NC	1.42884	1.56009	1.71425	1.84549	U	0.0848889	0.216133	-0.105933	0.0253111	NC
1471	CST3	-0.775956	-0.732997	-0.392307	-0.349348	NC	0.461741	0.563236	0.84539	0.946884	NC	-1.10829	-1.25036	-1.20978	-1.35185	D	0.12941	-0.0126639	0.0864512	-0.0556222	NC
149473	CCDC24	-1.04783	-0.690672	-1.35082	-0.993658	NC	0.526287	1.16644	0.2233	0.863449	NC	-1.6923	-1.52629	-2.33245	-2.16644	D	-0.118181	0.0478285	-0.475338	-0.309328	NC
1512	CTSH	-1.19155	-1.21404	-0.978317	-1.00081	NC	0.553683	0.676675	0.766914	0.889907	NC	-1.63775	-1.73887	-1.76074	-1.86186	D	0.107484	0.0063625	0.129977	0.0288549	NC
154467	CCDC167	-0.523952	-0.978351	-0.494042	-0.948442	NC	0.641985	1.08251	0.671895	1.11242	NC	-1.96547	-1.17493	-2.40599	-1.61545	D	-0.799535	-0.00898878	-0.345135	0.445411	NC
1891	ECH1	-1.00265	-1.02464	-0.688503	-0.710493	NC	0.547991	0.255114	0.86214	0.569262	NC	-1.73004	-1.74886	-1.43716	-1.45598	D	-0.179393	-0.198217	-0.157403	-0.176227	NC
2201	FBN2	1.32761	1.18148	0.846768	0.700636	NC	0.722897	-0.0494825	0.242054	-0.530326	NC	1.15588	1.35869	1.92826	2.13107	U	0.551165	0.753977	0.697298	0.900109	NC
224	ALDH3A2	-0.853184	-1.03735	-0.871116	-1.05528	NC	0.600309	0.435485	0.582377	0.417553	NC	-1.89619	-1.89427	-1.73137	-1.72944	D	-0.4427	-0.440775	-0.258533	-0.256608	NC
231	AKR1B1	-0.69868	-0.319891	-0.506247	-0.127458	NC	0.80375	0.92974	0.996183	1.12217	NC	-1.21632	-1.45858	-1.34231	-1.58457	D	0.286112	0.0438471	-0.0926776	-0.334942	NC
23499	MACF1	1.18037	0.803857	0.495325	0.118816	NC	0.0413211	-0.525091	-0.64372	-1.21013	NC	1.01183	1.21851	1.57824	1.78492	U	-0.127213	0.079462	0.249296	0.455971	NC
23564	DDAH2	-1.26359	-1.1364	-0.910874	-0.783682	NC	0.328007	-0.250353	0.680721	0.102362	NC	-1.86933	-1.66665	-1.29097	-1.08829	D	-0.277735	-0.0750507	-0.404927	-0.202243	NC
23641	LDOC1	-0.971769	-0.719837	-0.717542	-0.46561	NC	0.457864	0.00874553	0.712091	0.262972	NC	-1.43579	-1.65315	-0.986672	-1.20403	D	-0.00615748	-0.223519	-0.258089	-0.475451	NC
23762	OSBP2	0.775627	0.773892	0.631661	0.629926	NC	-0.300931	-0.417018	-0.444897	-0.560984	NC	1.21059	1.17459	1.32668	1.29068	U	0.134031	0.0980321	0.135766	0.0997671	NC
247	ALOX15B	-0.772014	-0.938042	-0.767101	-0.93313	NC	1.00911	0.611467	1.01402	0.61638	NC	-1.49605	-1.61247	-1.09841	-1.21483	D	0.28507	0.168656	0.451099	0.334684	NC
25864	ABHD14A	-0.981685	-0.678407	-1.3752	-1.07192	NC	0.753956	0.586637	0.360443	0.193123	NC	-2	-1.6741	-1.83268	-1.50678	D	-0.264359	0.0615384	-0.567637	-0.24174	NC
2592	GALT	-0.547216	-0.50152	-0.453636	-0.40794	NC	0.754975	0.461356	0.848555	0.554936	NC	-1.54915	-1.54304	-1.25553	-1.24942	D	-0.246961	-0.240852	-0.292657	-0.286548	NC
2651	GCNT2	1.37084	0.974909	1.09954	0.703607	NC	-0.273018	0.186413	-0.544321	-0.0848889	NC	1.85798	1.39232	1.39855	0.932886	U	0.214125	-0.251539	0.610053	0.14439	NC
26999	CYFIP2	-0.862981	-0.647521	-1.08004	-0.86458	NC	1.23526	0.712267	1.0182	0.495208	NC	-1.80171	-1.99548	-1.27872	-1.47249	D	0.296531	0.10276	0.0810716	-0.1127	NC
284346	ZNF575	-1.52893	-0.391425	-1.1745	-0.0369942	NC	0.174679	0.284303	0.529109	0.638734	NC	-2.30933	-1.66297	-2.41895	-1.77259	D	-0.605721	0.040642	-1.74322	-1.09686	NC
285847	LOC285847	-0.376563	-1.12199	-0.610053	-1.35548	NC	0.756331	0.504792	0.522841	0.271302	NC	-1.60823	-2.57347	-1.35669	-2.32193	D	-0.475338	-1.44057	0.270089	-0.695145	NC
29968	PSAT1	0.863365	1.10647	0.738179	0.981286	NC	-0.472736	-0.111826	-0.597922	-0.237012	NC	2.29269	2.58209	1.93178	2.22118	U	0.956587	1.24599	0.71348	1.00288	NC
30001	ERO1L	0.739176	0.978508	0.708429	0.947762	NC	-0.826042	-1.10882	-0.856789	-1.13957	NC	1.25171	1.23435	1.53449	1.51713	U	-0.313512	-0.33087	-0.552844	-0.570202	NC
30815	ST6GALNAC6	-0.720865	-1.07422	-0.661799	-1.01515	NC	0.11325	0.00618741	0.172316	0.0652533	NC	-1.52967	-1.64147	-1.4226	-1.53441	D	-0.695551	-0.807355	-0.342198	-0.454002	NC
30817	ADGRE2	0.645335	0.346035	0.710186	0.410886	NC	-0.413277	-0.770829	-0.348426	-0.705978	NC	1.79828	1.71498	2.15583	2.07253	U	0.739666	0.65637	1.03897	0.955671	NC
349667	RTN4RL2	0.772474	0.730328	1.12427	1.08213	NC	0.423292	-0.0978473	0.77509	0.253951	NC	1.40086	1.39148	1.922	1.91262	U	1.05168	1.04229	1.09382	1.08444	NC
389541	LAMTOR4	-0.541241	-1.18527	-0.163931	-0.807956	NC	0.683265	0.93425	1.06057	1.31156	NC	-1.28778	-1.00866	-1.53877	-1.25965	D	-0.0632742	0.215841	0.58075	0.859865	NC
3992	FADS1	-0.606464	-0.476067	-0.721284	-0.590887	NC	1.17655	0.766539	1.06173	0.651718	NC	-1.80264	-1.21111	-1.39263	-0.801096	D	-0.0196288	0.571906	-0.150025	0.44151	NC
400916	CHCHD10	-0.558966	-0.275234	-0.574276	-0.290544	NC	0.516674	0.664958	0.501363	0.649648	NC	-1.1816	-1.33395	-1.32988	-1.48224	D	-0.105959	-0.258312	-0.389691	-0.542044	NC
4061	LY6E	-1.00442	-1.01906	-0.605379	-0.620023	NC	0.285707	-0.0636954	0.684747	0.335345	NC	-1.44812	-2.11553	-1.09872	-1.76613	D	-0.157992	-0.825407	-0.143348	-0.810763	NC
4257	MGST1	-1.01827	-0.809246	-0.912222	-0.703202	NC	0.330776	-0.128536	0.43682	-0.0224912	NC	-1.58623	-1.84797	-1.12692	-1.38866	D	-0.237189	-0.498929	-0.446209	-0.70795	NC
4323	MMP14	1.20711	0.889578	1.00284	0.68531	NC	-0.0174666	-1.01977	-0.221734	-1.22404	NC	1.96368	1.83402	2.96599	2.83633	U	0.739109	0.60945	1.05664	0.926977	NC
4357	MPST	-0.45527	-0.370499	-0.307595	-0.222823	NC	0.0756667	0.395062	0.223342	0.542737	NC	-1.20572	-1.0038	-1.52512	-1.3232	D	-0.674784	-0.472865	-0.759556	-0.557636	NC
4837	NNMT	-0.921034	-0.945206	-0.63015	-0.654322	NC	-0.0721682	0.138336	0.218716	0.42922	NC	-1.91924	-1.64648	-2.12974	-1.85698	D	-1.07037	-0.797612	-1.0462	-0.77344	NC
4953	ODC1	0.341768	0.437454	0.325883	0.421569	NC	-1.17261	-0.615702	-1.18849	-0.631587	NC	1.90613	1.99518	1.34923	1.43828	U	0.391758	0.480807	0.296072	0.385121	NC
50649	ARHGEF4	-1.06322	-1.15632	-1.14568	-1.23879	NC	0.0919402	-0.264474	0.00947809	-0.346936	NC	-1.39671	-1.88712	-1.0403	-1.53071	D	-0.241555	-0.731965	-0.148445	-0.638856	NC
51019	CCDC53	-0.590609	-0.496536	-0.41889	-0.324816	NC	0.10567	-0.131879	0.27739	0.0398403	NC	-1.33148	-1.48829	-1.09393	-1.25074	D	-0.635203	-0.792007	-0.729276	-0.88608	NC
51147	ING4	-0.207658	0.186096	-0.284009	0.109745	NC	0.981588	0.938599	0.905237	0.862249	NC	-1.79549	-1.30875	-1.7525	-1.26576	D	-0.606246	-0.119507	-1	-0.513261	NC
51175	TUBE1	0.0264722	-0.300931	0.0995357	-0.227868	NC	-0.63941	-0.747393	-0.566347	-0.67433	NC	1.21544	1.61697	1.32342	1.72496	U	0.549557	0.95109	0.87696	1.27849	NC
54939	COMMD4	-0.309855	-0.246161	-0.111773	-0.0480786	NC	0.418065	0.911248	0.616147	1.10933	NC	-1.29496	-0.988552	-1.78814	-1.48174	D	-0.567041	-0.260632	-0.630735	-0.324327	NC
55240	STEAP3	-0.706136	-0.855394	-0.95818	-1.10744	NC	0.232822	0.380648	-0.019222	0.128604	NC	-1.73196	-1.48689	-1.87978	-1.63472	D	-0.793	-0.547932	-0.643742	-0.398674	NC
56123	PCDHB13	0.049753	0.16711	-0.509674	-0.392317	NC	-0.189034	-0.21818	-0.748461	-0.777608	NC	1.23879	1.53605	1.26793	1.5652	U	1	1.29727	0.882643	1.17991	NC
572	BAD	-0.745612	-0.883172	-0.364114	-0.501673	NC	0.350101	0.356589	0.7316	0.738088	NC	-1.64526	-1.75073	-1.65174	-1.75722	D	-0.549542	-0.655018	-0.411983	-0.517459	NC
57402	S100A14	-0.938354	-0.824041	-0.753793	-0.63948	NC	-0.434031	-0.347112	-0.24947	-0.162552	NC	-1.41178	-1.11721	-1.4987	-1.20413	D	-0.907461	-0.612886	-1.02177	-0.727198	NC
57695	USP37	1.07276	1.11356	0.376148	0.416955	NC	-0.0124909	-0.629162	-0.709099	-1.32577	NC	1.07337	1.20436	1.69004	1.82103	U	-0.0118741	0.119111	-0.0526803	0.078305	NC
619208	FAM229B	-0.949119	-0.653134	-0.926751	-0.630766	NC	0.827298	1.12059	0.849666	1.14296	NC	-1.34717	-1.91107	-1.64046	-2.20436	D	0.429251	-0.13465	0.133267	-0.430634	NC
6337	SCNN1A	-0.824594	-0.948267	-0.794335	-0.918009	NC	0.829195	0.0851053	0.859454	0.115364	NC	-2.31585	-2.41145	-1.57176	-1.66736	D	-0.66206	-0.757666	-0.538387	-0.633992	NC
64077	LHPP	-0.188267	-0.709099	-0.644905	-1.16574	NC	1.59896	0.947248	1.14232	0.49061	NC	-2.98363	-2.24066	-2.33191	-1.58895	D	-1.1964	-0.453433	-0.675565	0.0673993	NC
645	BLVRB	-1.13903	-0.890672	-0.951059	-0.702702	NC	0.96632	1.03663	1.15429	1.2246	NC	-1.41535	-1.2322	-1.48567	-1.30252	D	0.689996	0.873148	0.441638	0.62479	NC
6470	SHMT1	-1.07276	-0.690968	-0.951213	-0.569425	NC	0.243475	-0.185423	0.365018	-0.0638797	NC	-2.10505	-1.9592	-1.67615	-1.5303	D	-0.788819	-0.642968	-1.17061	-1.02476	NC
65010	SLC26A6	-0.830788	-1.05223	-0.705257	-0.926699	NC	-0.147853	-0.325272	-0.0223223	-0.199741	NC	-1.33352	-1.41642	-1.1561	-1.239	D	-0.650584	-0.733485	-0.429142	-0.512043	NC
654364	NME1-NME2	-1.15056	-0.580097	-1.19849	-0.628031	NC	-0.472488	0.298341	-0.520422	0.250407	NC	-1.60768	-0.798366	-2.37851	-1.5692	D	-0.929611	-0.120294	-1.50007	-0.690757	NC
6715	SRD5A1	-1.06012	-0.697172	-1.05356	-0.690614	NC	0.675821	0.454964	0.682379	0.461521	NC	-1.33375	-1.44087	-1.11289	-1.22001	D	0.402191	0.295077	0.0392416	-0.0678721	NC
677838	SNORA61	-0.558307	-0.36257	-0.822835	-0.627098	NC	0.0785334	1.30002	-0.185995	1.03549	NC	-1.2868	-1.41115	-2.50828	-2.63263	D	-0.649956	-0.77431	-0.845693	-0.970047	NC
684	BST2	-1.00867	-0.850321	-0.519943	-0.361596	NC	0.608003	1.10204	1.09673	1.59076	NC	-1.20981	-1.33922	-1.70384	-1.83325	D	0.406864	0.277452	0.248517	0.119106	NC
7059	THBS3	-0.922083	-1.26663	-0.551556	-0.896106	NC	0.763515	1.11611	1.13404	1.48663	NC	-1.35011	-1.13616	-1.7027	-1.48875	D	0.335486	0.549442	0.680036	0.893992	NC
7704	ZBTB16	-0.0419941	-0.301381	-1.04199	-1.30138	NC	0.797183	0.363883	-0.202817	-0.636117	NC	-2.08406	-1.59864	-1.65076	-1.16534	D	-1.24489	-0.75946	-0.9855	-0.500074	NC
7784	ZP3	-0.856091	-0.900599	-0.757995	-0.802504	NC	0.789664	0.481097	0.887759	0.579192	NC	-2	-1.55036	-1.69143	-1.2418	D	-0.354246	0.0953903	-0.309738	0.139899	NC
79006	METRN	-0.911609	-0.820562	-0.530642	-0.439595	NC	0.412625	0.609298	0.793593	0.990266	NC	-1.4882	-1.12009	-1.68487	-1.31677	D	-0.16396	0.204141	-0.255007	0.113094	NC
79703	C11orf80	-0.918108	-0.93202	-0.787038	-0.80095	NC	0.671002	0.615173	0.802072	0.746243	NC	-1.40602	-1.55761	-1.35019	-1.50178	D	0.183095	0.0314982	0.197007	0.0454105	NC
79735	TBC1D17	-0.703753	-1.11647	-0.266046	-0.678766	NC	0.886301	0.125887	1.32401	0.563595	NC	-2.00834	-2.24631	-1.24793	-1.4859	D	-0.418287	-0.656256	-0.00556668	-0.243536	NC
79763	ISOC2	-1.2466	-1.10795	-0.838499	-0.699842	NC	-0.674214	-1.00208	-0.266108	-0.593969	NC	-1.44863	-1.54393	-1.12077	-1.21607	D	-0.87624	-0.971537	-1.0149	-1.11019	NC
79879	CCDC134	0.952521	0.138447	1.27705	0.462972	NC	-1.50423	-1.01042	-1.17971	-0.685891	NC	1.61411	2.10639	1.12029	1.61257	U	-0.842644	-0.350363	-0.0285692	0.463711	NC
80199	FUZ	-0.570815	-0.33735	-0.297266	-0.0638015	NC	0.778854	0.86929	1.0524	1.14284	NC	-1.38	-1.26758	-1.47043	-1.35801	D	-0.0303264	0.0820916	-0.263791	-0.151373	NC
81544	GDPD5	-0.454694	-0.764845	-0.270897	-0.581047	NC	0.509387	-0.195606	0.693184	-0.0118093	NC	-1.99758	-1.96882	-1.29258	-1.26383	D	-1.0335	-1.00474	-0.723346	-0.694587	NC
84317	CCDC115	-0.926937	-0.456858	-0.490507	-0.0204279	NC	-0.016962	0.0388192	0.419468	0.475249	NC	-1.44247	-1.45801	-1.49825	-1.51379	D	-0.532495	-0.548036	-1.00257	-1.01811	NC
84418	CYSTM1	0.975061	1.12439	1.08745	1.23677	NC	-0.0730598	-0.0916946	0.0393243	0.0206895	NC	1.45271	1.33916	1.47134	1.3578	U	0.404589	0.291043	0.255261	0.141715	NC
84964	ALKBH6	-0.392246	-0.113468	-0.118605	0.160172	NC	0.685519	0.544583	0.95916	0.818224	NC	-1.72511	-1.30066	-1.58418	-1.15972	D	-0.647347	-0.222895	-0.926124	-0.501672	NC
8508	NIPSNAP1	-1.1164	-1.10046	-1.18675	-1.17081	NC	0.728252	0.57041	0.657906	0.500065	NC	-1.77426	-1.6378	-1.61642	-1.47996	D	0.0703893	0.206852	0.0544478	0.19091	NC
8527	DGKD	0.544321	-0.0614005	0.342106	-0.263615	NC	-0.550316	-0.82415	-0.752531	-1.02636	NC	1.46431	1.38039	1.73815	1.65423	U	0.369677	0.285754	0.975398	0.891476	NC
89795	NAV3	0.371969	1.19794	-0.447459	0.378512	NC	-0.0874628	-0.180572	-0.906891	-1	NC	1.80735	1.61471	1.90046	1.70782	U	1.34792	1.15528	0.521953	0.329308	NC
929	CD14	-0.531248	-0.686006	-0.278201	-0.432959	NC	0.76569	0.470657	1.01874	0.723704	NC	-1.69367	-1.30842	-1.39864	-1.01338	D	-0.396731	-0.0114804	-0.241973	0.143278	NC
9315	NREP	0.195155	0.845315	-0.220887	0.429274	NC	1.32594	0.51216	0.909899	0.0961182	NC	-1.66403	-2.07907	-0.850253	-1.26529	D	-0.533247	-0.948285	-1.18341	-1.59845	NC
9524	TECR	-1.08514	-1.1437	-0.68402	-0.74258	NC	0.768468	0.518969	1.16958	0.920085	NC	-1.29576	-1.61354	-1.04626	-1.36404	D	0.557844	0.240066	0.616404	0.298626	NC
9540	TP53I3	-0.400141	-0.431066	-0.0706365	-0.101562	NC	0.00599101	0.241868	0.335495	0.571372	NC	-1.20097	-1.14611	-1.43685	-1.38198	D	-0.794843	-0.739974	-0.763917	-0.709048	NC
9759	HDAC4	0.436571	-0.0894982	0.383329	-0.14274	NC	-0.425926	-0.845829	-0.479168	-0.899071	NC	0.813587	1.20353	1.23349	1.62344	U	-0.0489096	0.341037	0.477159	0.867106	NC
9862	MED24	1.07733	1.03685	1.08303	1.04254	NC	-0.642613	-0.625513	-0.636915	-0.619815	NC	1.23996	1.2505	1.22286	1.2334	U	-0.47998	-0.469446	-0.439496	-0.428963	NC
NM_001308045	-	0.492598	-0.792059	-0.588931	-1.87359	NC	1.49855	0.753644	0.417018	-0.327886	NC	-2.29061	-1.50415	-1.5457	-0.759247	D	-1.28466	-0.498201	0	0.786456	NC
NR_131905	-	0.756074	1.34104	0.604071	1.18903	NC	0.236067	0.900464	0.0840643	0.748461	NC	1.91594	1.5009	1.25154	0.836501	U	1.39593	0.980891	0.810966	0.395929	NC
100131187	TSTD1	-0.654079	-0.147342	-0.208587	0.298151	NC	1.13077	1.46694	1.57627	1.91243	U	-0.359334	-0.620281	-0.695496	-0.956444	NC	1.42552	1.16457	0.918782	0.657834	NC
100131691	MZF1-AS1	0.233097	0.0733167	0.623279	0.463499	NC	1.56892	1.42356	1.9591	1.81374	U	-0.232027	-0.338734	-0.0866665	-0.193374	NC	1.1038	0.997088	1.26358	1.15687	NC
100132062	LOC100132062	0.229482	0.367439	0.786908	0.924866	NC	1.60241	1.5037	2.15984	2.06113	U	-0.806392	-0.322651	-0.707682	-0.223941	NC	0.566541	1.05028	0.428584	0.912324	NC
100132169	WASIR2	0.0208586	-0.12808	0.187723	0.0387845	NC	1.4135	1.76265	1.58037	1.92951	U	-0.446264	-0.592211	-0.795408	-0.941354	NC	0.946382	0.800436	1.09532	0.949374	NC
10018	BCL2L11	1.1517	1.00914	0.783253	0.640696	NC	1.74489	1.35974	1.37645	0.991292	U	-0.264859	-0.159249	0.120294	0.225904	NC	0.328334	0.433944	0.470891	0.576501	NC
100288413	ERVMER34-1	-0.478404	-0.297702	-0.953133	-0.772432	NC	-1.0766	-1.7649	-1.55133	-2.23963	D	-0.373534	-0.468463	0.314768	0.219839	NC	-0.971732	-1.06666	-1.15243	-1.24736	NC
100289124	FAM27E2	-1.8009	-0.724084	-0.83289	0.243926	NC	-2.10046	-2.24631	-1.13245	-1.2783	D	0.449307	0.0274807	0.595158	0.173332	NC	0.149747	-0.27208	-0.927068	-1.3489	NC
100421577	FAM21EP	0.0806185	0.271302	0.569366	0.760049	NC	1.08062	1.46395	1.56937	1.95269	U	0.190684	0.113063	-0.192645	-0.270266	NC	1.19068	1.11306	1	0.922379	NC
100499171	LINC00276	-0.442518	0.401363	0.530515	1.3744	NC	0.841935	1.61193	1.81497	2.58496	U	-0.503766	0.158065	-1.27376	-0.61193	NC	0.780687	1.44252	-0.0631938	0.598637	NC
100505854	APTR	-0.209263	-0.0122263	-0.0887042	0.108333	NC	-1.33415	-1.30378	-1.2136	-1.18322	D	0.239827	0.467779	0.209453	0.437405	NC	-0.885064	-0.657112	-1.0821	-0.854149	NC
100506548	LOC100506548	0.543584	0.498707	0.516468	0.471591	NC	1.29986	1.58443	1.27275	1.55731	U	0.361407	0.365981	0.0768434	0.0814178	NC	1.11768	1.12226	1.16256	1.16714	NC
100506696	PCAT6	0.692468	0.221802	0.32898	-0.141687	NC	2.03371	1.89054	1.67022	1.52705	U	-0.590526	-1.2885	-0.447358	-1.14533	NC	0.750713	0.0527415	1.22138	0.523408	NC
100507412	LOC100507412	-0.130308	0.19878	0.254447	0.583535	NC	0.91908	1.27392	1.30383	1.65868	U	0.00346386	-0.560888	-0.351379	-0.915731	NC	1.05285	0.4885	0.723764	0.159412	NC
100507463	PSMB8-AS1	-0.0868208	0.330942	-0.345739	0.0720241	NC	1.23292	1.70517	0.974005	1.44626	U	-0.370838	-0.725354	-0.843089	-1.19761	NC	0.948906	0.59439	0.531143	0.176626	NC
100507501	LINC01569	0.360043	0.470747	0.149056	0.259759	NC	1.44177	1.46253	1.23078	1.25154	U	0.1413	-0.0641303	0.120542	-0.0848889	NC	1.22302	1.01759	1.11232	0.906891	NC
100532736	MINOS1-NBL1	-0.301002	1.22462	-0.508147	1.01748	NC	1.46717	1.9864	1.26003	1.77926	U	-0.781701	-0.549632	-1.30094	-1.06887	NC	0.986472	1.21854	-0.539152	-0.307083	NC
100652929	HP09025	0.23791	-0.320492	0.725638	0.167236	NC	0.728896	1.67411	1.21662	2.16184	U	0.368339	0.0644319	-0.57688	-0.880787	NC	0.859325	0.555418	1.41773	1.11382	NC
10076	PTPRU	0.0331893	-0.450694	-0.317482	-0.801366	NC	-0.93154	-1.29115	-1.28221	-1.64182	D	-0.305076	-0.232472	0.0545373	0.127141	NC	-1.26981	-1.1972	-0.785922	-0.713318	NC
100874278	ERI3-IT1	1.54749	-0.0280144	1.078	-0.4975	NC	1.6746	1.27684	1.20511	0.807355	U	-0.55486	-0.287577	-0.157101	0.110183	NC	-0.427749	-0.160465	1.14775	1.41504	NC
100874392	ANKRD20A12P	0.392317	0.97728	-0.893085	-0.308122	NC	2.36632	2.66534	1.08092	1.37993	U	-0.84276	-0.546143	-1.14177	-0.845157	NC	1.13124	1.42786	0.546282	0.842899	NC
10126	DNAL4	0.871992	0.374618	0.935593	0.438218	NC	1.31335	1.68268	1.37695	1.74628	U	-0.522193	-0.389191	-0.891528	-0.758526	NC	-0.0808383	0.0521639	0.416536	0.549539	NC
101926971	LINC01284	0.523562	-1	1.61667	0.0931094	NC	1.33985	0.321928	2.43296	1.41504	U	-0.0360693	-1.29546	0.981853	-0.277534	NC	0.780219	-0.479168	2.30378	1.04439	NC
101927102	ITFG1-AS1	0.972519	1.3806	0.224706	0.632791	NC	1.67296	1.98633	0.925146	1.23851	U	-0.542898	0.0667261	-0.856265	-0.24664	NC	0.157541	0.767166	-0.250543	0.359081	NC
101927181	LOC101927181	0.289507	-0.31982	0.713006	0.103679	NC	0.941897	1.558	1.3654	1.98149	U	0.181347	-0.238216	-0.434751	-0.854314	NC	0.833737	0.414174	1.44306	1.0235	NC
101928079	LINC01057	-0.379935	-0.185323	-0.0201683	0.174444	NC	-1.32451	-1.98753	-0.964738	-1.62776	D	0.690021	-0.0616607	1.35304	0.60136	NC	-0.254549	-1.00623	-0.449161	-1.20084	NC
10316	NMUR1	0.402965	0.0931094	0.57289	0.263034	NC	1.11548	1.53605	1.2854	1.70598	U	-0.724687	-0.0916305	-1.14526	-0.512206	NC	-0.0121747	0.620882	0.297681	0.930737	NC
104472714	DISC1-IT1	-0.21856	-0.1676	0.525772	0.576733	NC	0.520684	1.20493	1.26502	1.94926	U	0.189782	-0.199246	-0.494465	-0.883493	NC	0.929026	0.539998	0.878066	0.489038	NC
10516	FBLN5	-0.733925	0.266075	-0.969303	0.0306968	NC	1.65042	1.29613	1.41504	1.06075	U	-1.33949	-0.744743	-0.985203	-0.390459	NC	1.04485	1.6396	0.0448542	0.639598	NC
10622	POLR3G	0.156485	0.366128	-0.159017	0.0506261	NC	-1.74053	-1.48785	-2.05603	-1.80335	D	0.856174	1.01421	0.603493	0.761533	NC	-1.04084	-0.882803	-1.25049	-1.09245	NC
10625	IVNS1ABP	-0.196034	-0.184651	-0.378512	-0.367129	NC	-1.37204	-1.75832	-1.55452	-1.9408	D	0.0662337	0.345616	0.452512	0.731895	NC	-1.10977	-0.830392	-1.12116	-0.841775	NC
10645	CAMKK2	-0.169712	-0.378597	-0.285058	-0.493943	NC	-1.21842	-1.51676	-1.33377	-1.63211	D	-0.132755	-0.0962837	0.165586	0.202058	NC	-1.18147	-1.145	-0.972582	-0.93611	NC
10810	WASF3	0.0696342	0.102	-0.323438	-0.291072	NC	-1.32457	-1.51533	-1.71764	-1.9084	D	0.47022	0.493911	0.660976	0.684666	NC	-0.923987	-0.900296	-0.956352	-0.932662	NC
10813	UTP14A	-0.323584	-0.408435	-0.288075	-0.372927	NC	-1.37329	-1.38707	-1.33778	-1.35157	D	-0.069361	-0.0514835	-0.05558	-0.0377025	NC	-1.11907	-1.10119	-1.03422	-1.01634	NC
10874	NMU	0.349782	0.62435	0.0755071	0.350075	NC	1.31252	1.49174	1.03825	1.21746	U	-0.48375	-0.229048	-0.662965	-0.408263	NC	0.47899	0.733692	0.204422	0.459124	NC
11097	NUPL2	-0.386596	0.0871903	-0.21354	0.260246	NC	-2.10471	-1.51709	-1.93165	-1.34403	D	0.868661	1.32352	0.281044	0.735904	NC	-0.849451	-0.39459	-1.32324	-0.868376	NC
11098	PRSS23	0.636188	1.00866	0.487665	0.860142	NC	1.51978	1.3765	1.37126	1.22798	U	-0.0121747	-0.519778	0.131099	-0.376505	NC	0.871416	0.363812	0.498939	-0.00866486	NC
11132	CAPN10	-0.0606628	-0.375968	-0.168941	-0.484246	NC	-1.3433	-1.52065	-1.45158	-1.62893	D	0.317615	0.196006	0.494961	0.373352	NC	-0.965024	-1.08663	-0.649719	-0.771328	NC
11165	NUDT3	0.343051	0.179821	0.278551	0.115321	NC	-1.20547	-1.37172	-1.26997	-1.43622	D	0.493815	0.497295	0.660064	0.663545	NC	-1.05471	-1.05123	-0.891476	-0.887995	NC
1122	CHML	-0.127473	0.0915835	-0.796366	-0.577309	NC	-0.568284	-1.28578	-1.23718	-1.95468	D	-0.334419	0.17444	0.383081	0.89194	NC	-0.77523	-0.26637	-0.994286	-0.485427	NC
112574	SNX18	-0.0926493	0.467567	-0.897043	-0.336827	NC	-0.88718	-1.21551	-1.69157	-2.0199	D	0.288345	0.339692	0.616671	0.668018	NC	-0.506185	-0.454839	-1.0664	-1.01505	NC
112840	WDR89	-0.157297	-0.278976	-0.0520885	-0.173767	NC	-1.94708	-1.36212	-1.84187	-1.25691	D	0.640919	0.71727	0.0559564	0.132307	NC	-1.14886	-1.07251	-1.02718	-0.950834	NC
11285	B4GALT7	-0.0358304	-0.315161	-0.0464082	-0.325739	NC	-1.31076	-2.16345	-1.32134	-2.17403	D	-0.103093	0.115252	0.749593	0.967939	NC	-1.37803	-1.15968	-1.0987	-0.880352	NC
112939	NACC1	-0.0848515	-0.286373	0.0026224	-0.198899	NC	-1.22734	-1.48493	-1.13987	-1.39746	D	0.197388	-0.0116146	0.45498	0.245977	NC	-0.945102	-1.1541	-0.74358	-0.952583	NC
114026	ZIM3	0.930737	0.954196	0.376148	0.399607	NC	1.24793	1.88264	0.693339	1.32805	U	-0.0981804	0.109624	-0.732896	-0.525091	NC	0.21901	0.426815	0.195551	0.403356	NC
114791	TUBGCP5	0.0787431	-0.16378	0.242523	0	NC	-1.59202	-1.7022	-1.42824	-1.53842	D	0.436099	0.592017	0.546282	0.7022	NC	-1.23466	-1.07874	-0.992138	-0.83622	NC
114904	C1QTNF6	0.34189	0.0819217	0.891624	0.631656	NC	1.83261	1.79853	2.38234	2.34826	U	-0.388284	-0.577699	-0.354207	-0.543622	NC	1.10243	0.913017	1.3624	1.17298	NC
117608	ZNF354B	0.850622	0.788081	-0.0848889	-0.14743	NC	-0.444237	-1.50447	-1.37975	-2.43998	D	0.471569	0.0782848	1.5318	1.13852	NC	-0.82329	-1.21658	-0.760749	-1.15403	NC
132864	CPEB2	0.026967	0.17897	-0.614346	-0.462343	NC	-0.654671	-1.66903	-1.29598	-2.31034	D	-0.283172	-0.0582986	0.731183	0.956057	NC	-0.964811	-0.739937	-1.11681	-0.89194	NC
133308	SLC9B2	-0.315962	-0.11269	-0.384453	-0.18118	NC	-1.50889	-1.70803	-1.57738	-1.77652	D	0.658661	0.290743	0.857801	0.489884	NC	-0.534268	-0.902185	-0.73754	-1.10546	NC
133418	EMB	-0.28844	-0.0942481	-0.2506	-0.0564083	NC	-1.22221	-1.34424	-1.18437	-1.3064	D	0.250742	0.353691	0.372769	0.475718	NC	-0.683033	-0.580084	-0.877225	-0.774275	NC
133619	PRRC1	0.0203591	0.0903108	-0.538269	-0.468318	NC	-0.84353	-1.7633	-1.40216	-2.32193	D	-0.301448	-0.218681	0.618321	0.701089	NC	-1.16534	-1.08257	-1.23529	-1.15252	NC
1385	CREB1	-0.336236	-0.969943	-0.442337	-1.07604	NC	-1.24793	-1.40998	-1.35403	-1.51609	D	0.529821	0.666757	0.691878	0.828813	NC	-0.381871	-0.244935	0.251836	0.388772	NC
140564	APOBEC3D	-0.38471	-0.237517	0.198581	0.345775	NC	0.830806	1.57153	1.4141	2.15482	U	-0.0303936	-0.0911683	-0.771114	-0.831888	NC	1.18512	1.12435	1.03793	0.977155	NC
140576	S100A16	-0.364815	-0.302052	-0.0971023	-0.0343392	NC	-1.56726	-1.67926	-1.29955	-1.41154	D	0.206869	0.140478	0.318865	0.252474	NC	-0.995576	-1.06197	-1.05834	-1.12473	NC
140688	NOL4L	-0.777608	0.273018	-0.893085	0.157541	NC	-1.4975	-1.19265	-1.61298	-1.30812	D	0.719892	0.371969	0.415037	0.0671142	NC	0	-0.347923	-1.05063	-1.39855	NC
140691	TRIM69	1.23447	0.234465	0.367732	-0.632268	NC	2.68072	2.19794	1.81399	1.33121	U	-0.960829	-1.34192	-0.478047	-0.859137	NC	0.485427	0.104337	1.48543	1.10434	NC
147645	VSIG10L	0.29956	1.58496	-0.906891	0.378512	NC	2.27684	2.70895	1.07039	1.5025	U	-0.97728	-0.333424	-1.40939	-0.765535	NC	1	1.64386	-0.285402	0.358454	NC
147657	ZNF480	-0.520754	-0.673044	-0.604615	-0.756904	NC	-1.44779	-1.31207	-1.53165	-1.39593	D	0.0339473	0.0243293	-0.101771	-0.111389	NC	-0.893085	-0.902703	-0.740795	-0.750413	NC
148206	ZNF714	-0.208489	0.043458	0.231769	0.483715	NC	0.911296	1.60105	1.35155	2.04131	U	0.223397	0.0574855	-0.466356	-0.632268	NC	1.34318	1.17727	1.09124	0.925323	NC
151963	MB21D2	-0.528928	0.236606	-0.936806	-0.171271	NC	-1.57075	-0.903324	-1.97863	-1.3112	D	0.889817	-0.0874628	0.222392	-0.754888	NC	-0.152003	-1.12928	-0.917538	-1.89482	NC
152518	NFXL1	-0.260418	0.0182128	-0.444529	-0.165898	NC	-1.43348	-1.60606	-1.61759	-1.79017	D	0.095759	0.689518	0.268338	0.862098	NC	-1.07731	-0.483546	-1.35594	-0.762178	NC
153364	MBLAC2	-0.292608	-0.242276	-0.806135	-0.755803	NC	-1.22588	-2.38971	-1.73941	-2.90323	D	0.00812788	-0.0667261	1.17195	1.0971	NC	-0.925146	-1	-0.975478	-1.05033	NC
157638	FAM84B	-0.0780025	-0.00708073	-0.378225	-0.307303	NC	-0.9361	-1.53464	-1.23632	-1.83486	D	-0.0307331	0.0979581	0.567808	0.696499	NC	-0.888831	-0.760139	-0.959752	-0.831061	NC
160760	PPTC7	-0.0041044	-0.279523	-0.817303	-1.09272	NC	-0.745186	-2.29956	-1.55838	-3.11276	D	-0.452151	0.180572	1.10222	1.73495	NC	-1.19323	-0.560509	-0.917814	-0.285091	NC
161424	NOP9	-0.64689	-1.10909	-0.708852	-1.17105	NC	-1.18363	-2.29656	-1.24559	-2.35852	D	-0.652295	-0.593402	0.460634	0.519528	NC	-1.18903	-1.13014	-0.726831	-0.667938	NC
162073	ITPRIPL2	-0.358783	-0.217691	-0.449215	-0.308122	NC	-1.26115	-1.64707	-1.35158	-1.7375	D	-0.0522394	-0.1536	0.333679	0.232318	NC	-0.954608	-1.05597	-1.0957	-1.19706	NC
1643	DDB2	-0.730513	-0.577925	-0.685733	-0.533145	NC	1.19055	1.32122	1.23533	1.366	U	-0.897839	-0.897839	-1.02851	-1.02851	NC	1.02322	1.02322	0.870635	0.870635	NC
1649	DDIT3	1.18903	1.52273	0.717413	1.0511	NC	1.926	2.09986	1.45438	1.62824	U	0.0619277	0.621615	-0.111929	0.447758	NC	0.798893	1.35858	0.465202	1.02489	NC
169436	STKLD1	0.704544	0.799701	0.874469	0.969626	NC	2.34314	1.68806	2.51307	1.85798	U	-0.888579	-1.09803	-0.23349	-0.442943	NC	0.750022	0.540568	0.654865	0.445411	NC
169611	OLFML2A	0.559427	0.752072	-0.280108	-0.0874628	NC	1.4245	2.2115	0.584963	1.37197	U	0.0372329	0.415037	-0.749773	-0.371969	NC	0.902303	1.28011	0.709658	1.08746	NC
1756	DMD	-0.431157	0.0297473	-1.26573	-0.804829	NC	-0.668486	-1.26303	-1.50306	-2.09761	D	-0.668549	-0.216037	-0.0740006	0.378512	NC	-0.905878	-0.453366	-1.36678	-0.91427	NC
1773	DNASE1	-0.0290485	-0.0889614	0.539235	0.479322	NC	0.913585	1.50109	1.48187	2.06937	U	0.208146	0.197091	-0.379359	-0.390414	NC	1.15078	1.13972	1.21069	1.19964	NC
1777	DNASE2	-0.068684	0.00235158	-0.0159551	0.0550805	NC	1.55804	1.56323	1.61077	1.61595	U	-0.434349	-0.387592	-0.439535	-0.392778	NC	1.19238	1.23913	1.12134	1.1681	NC
1997	ELF1	-0.0585639	-0.251209	-0.570463	-0.763108	NC	-0.885894	-1.75823	-1.39779	-2.27013	D	-0.201817	0.164021	0.670521	1.03636	NC	-1.02915	-0.663309	-0.836501	-0.470663	NC
1998	ELF2	-0.373908	-0.285608	-0.625183	-0.536883	NC	-1.04234	-1.39975	-1.29361	-1.65102	D	-0.00452966	0.241008	0.352881	0.598419	NC	-0.672959	-0.427421	-0.761259	-0.515721	NC
219347	TMEM254-AS1	0.355095	0.703018	0.736966	1.08489	NC	2.08153	2.32193	2.4634	2.7038	U	-0.185867	-0.878438	-0.426265	-1.11884	NC	1.54057	0.847997	1.19265	0.500074	NC
220323	OAF	-0.458716	-0.475486	-0.375837	-0.392607	NC	-1.52943	-1.65965	-1.44655	-1.57678	D	0.730726	0.598197	0.860952	0.728423	NC	-0.339988	-0.472517	-0.323217	-0.455746	NC
221443	OARD1	0.910363	0.914979	1.10549	1.11011	NC	1.5704	1.41938	1.76553	1.61451	U	-1.28723	-0.371797	-1.1362	-0.220769	NC	-0.627191	0.288245	-0.631807	0.283628	NC
221692	PHACTR1	-0.106915	0.36257	-0.469485	0	NC	1.61891	1.28011	1.25634	0.917538	U	-1.51937	-0.25634	-1.18057	0.0824622	NC	0.206451	1.46949	-0.263034	1	NC
221710	SMIM13	-0.501775	-0.951477	-0.727067	-1.17677	NC	-2.11161	-2.44931	-2.3369	-2.6746	D	0	0.580775	0.337695	0.91847	NC	-1.60984	-1.02906	-1.16013	-0.57936	NC
222235	FBXL13	0.415037	0.680932	1	1.26589	NC	1.23217	1.27065	1.81714	1.85561	U	0.241758	-0.314636	0.203284	-0.35311	NC	1.05889	0.5025	0.793	0.236606	NC
222553	SLC35F1	0	-0.0356239	0.270089	0.234465	NC	0.946229	1.94166	1.21632	2.21175	U	0.139163	0.235378	-0.856265	-0.760049	NC	1.08539	1.18161	1.12102	1.21723	NC
2239	GPC4	1.16864	0.685267	0.803509	0.320135	NC	1.77231	1.2916	1.40718	0.926471	U	-0.179672	0.0134518	0.301033	0.494156	NC	0.423994	0.617118	0.907369	1.10049	NC
22841	RAB11FIP2	0.0446998	0.0689474	-0.0946369	-0.0703893	NC	-1.55996	-1.76755	-1.6993	-1.90689	D	0.59976	0.559958	0.807355	0.767554	NC	-1.0049	-1.0447	-1.02915	-1.06895	NC
22845	DOLK	-0.474972	-0.340787	-0.36469	-0.230505	NC	-1.28189	-1.82938	-1.17161	-1.7191	D	0.0181094	0.237499	0.565597	0.784987	NC	-0.788812	-0.569422	-0.922997	-0.703607	NC
22984	PDCD11	-0.200049	-0.765742	-0.346112	-0.911804	NC	-1.27147	-1.21918	-1.41753	-1.36524	D	0.0793156	-0.03367	0.0270265	-0.0859591	NC	-0.992103	-1.10509	-0.426411	-0.539397	NC
23023	TMCC1	-0.330645	-0.350208	-0.393011	-0.412573	NC	-1.18302	-1.37004	-1.24539	-1.4324	D	-0.345135	0.0217605	-0.158117	0.208779	NC	-1.19751	-0.830615	-1.17795	-0.811053	NC
23028	KDM1A	-0.15086	-0.0865113	-0.250259	-0.18591	NC	-1.43758	-1.62291	-1.53698	-1.72231	D	0.171163	0.240751	0.3565	0.426088	NC	-1.11555	-1.04597	-1.1799	-1.11031	NC
23060	ZNF609	0.135865	-0.281161	-0.32312	-0.740146	NC	-1.00821	-1.69024	-1.4672	-2.14923	D	0.38256	0.491999	1.06459	1.17403	NC	-0.761516	-0.652077	-0.34449	-0.235051	NC
2308	FOXO1	-0.3973	-0.37461	-0.878794	-0.856104	NC	-1.16055	-1.33574	-1.64204	-1.81723	D	-0.370447	0.0351505	-0.195256	0.210342	NC	-1.1337	-0.728099	-1.15639	-0.750789	NC
23137	SMC5	-0.166534	-0.0331932	-0.443644	-0.310303	NC	-1.41541	-1.24214	-1.69252	-1.51925	D	0.663283	0.560613	0.490008	0.387338	NC	-0.585598	-0.688268	-0.718939	-0.821609	NC
23138	N4BP3	-0.485427	-0.485427	0.736966	0.736966	NC	1.28011	0.0995357	2.5025	1.32193	U	-1.18057	-0.917538	0	0.263034	NC	0.584963	0.847997	0.584963	0.847997	NC
23167	EFR3A	-0.0955907	0.166424	-0.533803	-0.271787	NC	-0.885477	-1.32718	-1.32369	-1.76539	D	0.0904647	0.422943	0.53217	0.864648	NC	-0.699421	-0.366943	-0.961436	-0.628958	NC
23271	CAMSAP2	-0.197425	-0.187126	-0.889479	-0.879181	NC	-0.673519	-1.54264	-1.36557	-2.2347	D	-0.607119	-0.197243	0.262004	0.67188	NC	-1.08321	-0.673338	-1.09351	-0.683636	NC
23294	ANKS1A	0.339562	0.0345987	-0.0560867	-0.36105	NC	-1.13704	-1.52327	-1.53269	-1.91892	D	0.58325	0.698464	0.969484	1.0847	NC	-0.893348	-0.778135	-0.588385	-0.473172	NC
23335	WDR7	0.0881309	0.109347	-0.49304	-0.471824	NC	-0.666757	-1.56242	-1.24793	-2.14359	D	0.169925	0.307429	1.06559	1.20309	NC	-0.584963	-0.447459	-0.606179	-0.468675	NC
23369	PUM2	0.189896	0.138549	-0.188857	-0.240204	NC	-1.14632	-1.34194	-1.52507	-1.7207	D	0.172239	0.357157	0.367864	0.552782	NC	-1.16398	-0.979058	-1.11263	-0.927711	NC
23395	LARS2	0.35216	-0.065095	-0.0263513	-0.443607	NC	-1.20972	-1.04307	-1.58823	-1.42158	D	0.639531	0.370183	0.472882	0.203533	NC	-0.922347	-1.1917	-0.505092	-0.77444	NC
23413	NCS1	-0.17683	-0.37411	-0.167986	-0.365266	NC	-1.44736	-1.34302	-1.43851	-1.33418	D	0.1127	-0.0396119	0.00836347	-0.143949	NC	-1.15783	-1.31014	-0.960549	-1.11286	NC
23435	TARDBP	-0.275981	-0.194462	-0.47851	-0.396992	NC	-1.20858	-1.53203	-1.41111	-1.73455	D	0.448337	0.274136	0.771785	0.597585	NC	-0.48426	-0.65846	-0.565778	-0.739979	NC
23466	CBX6	-0.298658	-0.483083	-0.485427	-0.669851	NC	-1.10962	-1.45066	-1.29639	-1.63743	D	-0.278301	-0.21818	0.0627358	0.122857	NC	-1.08927	-1.02915	-0.904843	-0.844722	NC
2395	FXN	-0.101688	0.139644	-0.334516	-0.0931837	NC	-1.51345	-1.04521	-1.74628	-1.27804	D	0.65547	0.460111	0.187232	-0.00812788	NC	-0.756293	-0.951652	-0.997625	-1.19298	NC
245711	SPDYA	-0.266939	-0.049582	0.214594	0.431951	NC	1.12594	1.32582	1.60747	1.80735	U	-0.35811	-0.662965	-0.557995	-0.86285	NC	1.03477	0.729911	0.817409	0.512554	NC
254863	TMEM256	0.0670898	0.340585	0.0516141	0.325109	NC	1.45009	2.41772	1.43461	2.40224	U	-0.301843	-0.219287	-1.26948	-1.18692	NC	1.08115	1.16371	0.807658	0.890214	NC
255488	RNF144B	-0.551445	-0.386549	-0.83927	-0.674373	NC	-0.92785	-1.31067	-1.21567	-1.59849	D	-0.483083	-0.192087	-0.100264	0.190732	NC	-0.859488	-0.568491	-1.02438	-0.733388	NC
25832	NBPF14	-0.169583	-0.152763	-0.25455	-0.23773	NC	1.45582	1.33147	1.37085	1.2465	U	-0.43276	-0.477869	-0.308407	-0.353516	NC	1.19265	1.14754	1.17582	1.13072	NC
25852	ARMC8	-0.23472	-0.0574503	-0.353194	-0.175924	NC	-1.55283	-1.09861	-1.6713	-1.21708	D	0.343377	0.661292	-0.110846	0.207069	NC	-0.974733	-0.656818	-1.152	-0.834088	NC
25875	LETMD1	1.1375	0.808642	0.887679	0.558818	NC	2.02015	1.76222	1.77032	1.51239	U	-0.299731	-0.196779	-0.0418006	0.0611513	NC	0.582912	0.685864	0.911773	1.01472	NC
26009	ZZZ3	0.218305	-0.174396	-0.0969413	-0.489642	NC	-1.27739	-1.73538	-1.59264	-2.05063	D	0.648926	0.199123	1.10692	0.657112	NC	-0.84677	-1.29657	-0.454068	-0.903871	NC
26034	IPCEF1	0	0.438121	1.04731	1.48543	NC	1.33121	1.38565	2.37851	2.43296	U	-0.427421	-0.427421	-0.481869	-0.481869	NC	0.903785	0.903785	0.465664	0.465664	NC
26278	SACS	0.122666	-0.193538	-0.748393	-1.0646	NC	-1.2297	-2.08356	-2.10076	-2.95462	D	0.152735	0.0644487	1.0066	0.918316	NC	-1.19963	-1.28791	-0.883424	-0.971711	NC
26499	PLEK2	0.598403	0.690933	0.622581	0.71511	NC	-1.29937	-1.51871	-1.27519	-1.49454	D	1.05294	0.885709	1.27228	1.10505	NC	-0.844833	-1.01206	-0.937362	-1.10459	NC
2650	GCNT1	0.323655	0.0757273	-0.697782	-0.94571	NC	-1.33931	-1.65578	-2.36075	-2.67722	D	0.463401	0.494765	0.779874	0.811238	NC	-1.19956	-1.1682	-0.951637	-0.920273	NC
26580	BSCL2	-0.0473057	-0.0844189	0.564498	0.527385	NC	1.15433	1.7607	1.76613	2.37251	U	-0.322177	-0.405445	-0.928552	-1.01182	NC	0.879457	0.796189	0.91657	0.833302	NC
27030	MLH3	0.0212165	0.349449	-0.26829	0.0599425	NC	-1.32193	-1.43296	-1.61143	-1.72247	D	0.311202	0.704544	0.422233	0.815575	NC	-1.03194	-0.6386	-1.36018	-0.966833	NC
27245	AHDC1	-0.442182	-1.11923	-0.363136	-1.04019	NC	-1.45756	-2.11111	-1.37851	-2.03206	D	-0.152003	-0.216394	0.501546	0.437156	NC	-1.16738	-1.23177	-0.490326	-0.554716	NC
27327	TNRC6A	-0.25793	-0.351137	-0.35332	-0.446527	NC	-1.37778	-1.59596	-1.47317	-1.69135	D	0.283454	0.249259	0.501634	0.467439	NC	-0.836397	-0.870592	-0.743191	-0.777386	NC
27338	UBE2S	0.633632	0.475414	0.913358	0.755141	NC	1.37338	1.59469	1.65311	1.87442	U	0.0660859	0.162952	-0.155224	-0.0583582	NC	0.805839	0.902705	0.964057	1.06092	NC
27340	UTP20	0.0342628	-0.256717	-0.448146	-0.739125	NC	-1.19847	-1.23349	-1.68088	-1.7159	D	0.0708835	-0.157009	0.105902	-0.121991	NC	-1.16185	-1.38974	-0.870871	-1.09876	NC
2738	GLI4	0.155518	-0.189855	0.244203	-0.10117	NC	1.15727	1.32895	1.24596	1.41763	U	-0.486304	-0.951733	-0.65798	-1.12341	NC	0.51545	0.0500207	0.860823	0.395393	NC
27429	HTRA2	-0.0815738	0.0237229	-0.0523247	0.052972	NC	-1.29203	-1.79607	-1.26278	-1.76682	D	0.31946	0.126815	0.823502	0.630857	NC	-0.890993	-1.08364	-0.99629	-1.18893	NC
282974	STK32C	-1.59816	-1.19452	-1.06388	-0.660251	NC	-2.48881	-2.03995	-1.95454	-1.50567	D	0.913195	1.30285	0.464333	0.853985	NC	0.0225426	0.412195	-0.38109	0.00856201	NC
283638	CEP170B	-0.205637	-0.781139	-0.351277	-0.926779	NC	-1.06125	-1.4611	-1.20689	-1.60674	D	-0.100763	0.0895781	0.299088	0.489429	NC	-0.956373	-0.766032	-0.380871	-0.19053	NC
283788	LOC283788	-0.306536	-0.26018	-0.537068	-0.490712	NC	1.51588	1.45727	1.28535	1.22673	U	-0.642712	-0.67292	-0.584096	-0.614303	NC	1.17971	1.1495	1.13335	1.10314	NC
285331	CCDC66	-0.337724	-0.28573	-0.399234	-0.347239	NC	-2.19902	-1.45486	-2.26053	-1.51637	D	1.14839	0.932313	0.404231	0.188152	NC	-0.712902	-0.928981	-0.764897	-0.980975	NC
285704	RGMB	-0.597437	-0.168015	-0.876308	-0.446886	NC	-1.13407	-2.1009	-1.41294	-2.37977	D	-0.0339473	0.371397	0.932886	1.33823	NC	-0.570579	-0.165234	-1	-0.594656	NC
285761	DCBLD1	0.191578	-0.257921	-0.424351	-0.87385	NC	-1.47014	-1.66391	-2.08607	-2.27984	D	0.760425	0.833028	0.954196	1.0268	NC	-0.901295	-0.828691	-0.451796	-0.379192	NC
286102	TMED10P1	0.613645	-0.185215	0.130704	-0.668156	NC	-1.01749	-1.28758	-1.50043	-1.77052	D	0.16601	0.946229	0.436099	1.21632	NC	-1.46512	-0.684904	-0.666263	0.113956	NC
286262	TPRN	0.270796	-0.181646	0.402194	-0.0502482	NC	1.32579	1.12116	1.45719	1.25256	U	-0.316159	-0.467806	-0.111535	-0.263182	NC	0.738833	0.587185	1.19127	1.03963	NC
2887	GRB10	0.0222643	-0.331495	-0.243385	-0.597145	NC	-1.31187	-1.27883	-1.57752	-1.54448	D	0.913929	1.1099	0.880889	1.07686	NC	-0.420202	-0.224235	-0.0664421	0.129525	NC
2954	GSTZ1	-0.788905	-0.258091	-0.770786	-0.239972	NC	1.27666	1.52053	1.29478	1.53864	U	-1.04625	-0.586822	-1.29012	-0.830685	NC	1.01931	1.47875	0.4885	0.947931	NC
2963	GTF2F2	-0.51823	-0.265913	-0.408731	-0.156415	NC	-1.2355	-1.37564	-1.126	-1.26614	D	-0.0517013	0.291899	0.088438	0.432038	NC	-0.768971	-0.425371	-1.02129	-0.677688	NC
29803	REPIN1	-0.0636651	-0.195207	-0.0602484	-0.19179	NC	-1.53014	-2.47811	-1.52672	-2.47469	D	0.225381	0.498218	1.17335	1.44619	NC	-1.24109	-0.968252	-1.10955	-0.836711	NC
29907	SNX15	0.46827	0.377881	0.503324	0.412935	NC	-1.27309	-1.52254	-1.23804	-1.48748	D	0.486999	0.637587	0.736442	0.88703	NC	-1.25436	-1.10378	-1.16398	-1.01339	NC
29945	ANAPC4	-0.19661	-0.0595624	-0.103209	0.0338387	NC	-1.24592	-1.74037	-1.15252	-1.64697	D	0.0509839	0.208986	0.545434	0.703436	NC	-0.998329	-0.840327	-1.13538	-0.977375	NC
3020	H3F3A	0.0838185	0.475122	-0.166287	0.225017	NC	1.21697	1.90295	0.96686	1.65284	U	-0.112661	0.0414284	-0.798642	-0.644552	NC	1.02049	1.17458	0.629183	0.783272	NC
3066	HDAC2	-0.114587	0.0532599	-0.100544	0.0673028	NC	-1.36151	-1.25173	-1.34747	-1.23769	D	0.198968	0.281226	0.089189	0.171447	NC	-1.04796	-0.965701	-1.21581	-1.13355	NC
3093	UBE2K	0.0958056	0.320573	-0.128038	0.0967297	NC	-1.109	-1.23486	-1.33284	-1.45871	D	0.0885367	0.437686	0.2144	0.563549	NC	-1.11627	-0.76712	-1.34104	-0.991887	NC
3099	HK2	0.106676	0.0972972	-0.236126	-0.245504	NC	-1.26707	-1.7038	-1.60987	-2.0466	D	0.264828	0.66862	0.70156	1.10535	NC	-1.10891	-0.705121	-1.09954	-0.695743	NC
3133	HLA-E	0.167975	0.166093	0.316062	0.31418	NC	1.18294	1.25493	1.33103	1.40302	U	0.00381112	0.10412	-0.0681729	0.0321361	NC	1.01878	1.11909	1.02066	1.12097	NC
3184	HNRNPD	-0.379384	-0.062835	-0.299785	0.016764	NC	-1.51296	-1.9525	-1.43336	-1.8729	D	0.183356	0.408648	0.622888	0.84818	NC	-0.950224	-0.724931	-1.26677	-1.04148	NC
3201	HOXA4	1.35292	0.9603	0.89724	0.50462	NC	1.7137	1.54031	1.25802	1.08463	U	-0.443808	-0.781203	-0.270423	-0.607818	NC	-0.0830318	-0.420427	0.309588	-0.0278067	NC
3312	HSPA8	0.359607	0.337826	0.387811	0.366029	NC	-1.92647	-1.72727	-1.89826	-1.69906	D	1.23413	1.10431	1.03493	0.905109	NC	-1.05195	-1.18176	-1.03016	-1.15998	NC
338692	ANKRD13D	-0.302053	-0.406667	0.0939228	-0.0106911	NC	-2.11998	-1.88259	-1.72401	-1.48661	D	1.15024	1.06685	0.912848	0.829453	NC	-0.667686	-0.751081	-0.563072	-0.646467	NC
340481	ZDHHC21	-0.017278	0.0995357	-0.579157	-0.462343	NC	-0.734106	-1.32623	-1.29598	-1.88811	D	0.028289	0.580193	0.620411	1.17232	NC	-0.688539	-0.136635	-0.805353	-0.253448	NC
3426	CFI	0.6096	0.914181	1.11979	1.42438	NC	1.64508	1.2792	2.15528	1.7894	U	-0.195653	-0.0941379	0.170226	0.271741	NC	0.839831	0.941346	0.53525	0.636765	NC
342666	LRRC37A11P	0.5025	-1	0.280108	-1.22239	NC	1.45943	1.22239	1.23704	1	U	-1.34395	0	-1.10692	0.237039	NC	-0.387023	0.956931	1.11548	2.45943	NC
346157	ZNF391	-0.369234	-1.18866	-1.09311	-1.91254	NC	-1.23173	-1.88381	-1.95561	-2.60768	D	0.347923	0.710493	1	1.36257	NC	-0.514573	-0.152003	0.304855	0.667425	NC
347744	C6orf52	0.634483	0.302563	0.168819	-0.163101	NC	1.6389	1.74519	1.17324	1.27952	U	-0.148576	-0.375867	-0.25486	-0.482152	NC	0.855843	0.628552	1.18776	0.960472	NC
353189	SLCO4C1	-0.485427	0	0	0.485427	NC	1.77761	1.51457	2.26303	2	U	-1.41504	-0.777608	-1.152	-0.514573	NC	0.847997	1.48543	0.36257	1	NC
353322	ANKRD37	0.557057	0.407556	0.107609	-0.0418916	NC	1.72196	1.44702	1.27252	0.997569	U	-0.383547	-0.103131	-0.1086	0.171816	NC	0.78136	1.06178	0.93086	1.21128	NC
3638	INSIG1	-0.425827	-0.00984779	-0.866916	-0.450937	NC	-0.78544	-1.47175	-1.22653	-1.91284	D	0.416849	0.633281	1.10316	1.31959	NC	0.0572353	0.273668	-0.358744	-0.142311	NC
3659	IRF1	0.0260474	0.117722	0.489256	0.580931	NC	0.801502	1.46032	1.26471	1.92353	U	0.258559	0.134301	-0.400255	-0.524513	NC	1.03401	0.909756	0.942339	0.818081	NC
378805	LINC-PINT	-0.50181	-0.923379	-0.648696	-1.07026	NC	-1.69837	-1.36395	-1.84526	-1.51084	D	0.729779	0.383329	0.39536	0.0489096	NC	-0.466781	-0.813231	-0.0452126	-0.391663	NC
3796	KIF2A	0.145781	0.0414027	-0.256417	-0.360794	NC	-0.981853	-1.81193	-1.38405	-2.21412	D	-0.0892673	0.107688	0.740808	0.937763	NC	-1.2169	-1.01995	-1.11252	-0.915567	NC
3845	KRAS	-0.00243083	0.0917426	-0.178281	-0.0841073	NC	-1.32558	-1.75489	-1.50143	-1.93074	D	0.330425	0.5542	0.759737	0.983512	NC	-0.99272	-0.768945	-1.08689	-0.863118	NC
387066	SNHG5	0.00897946	0.323095	0.516967	0.831083	NC	0.78432	1.7707	1.29231	2.27868	U	0.223582	0.68847	-0.762795	-0.297907	NC	0.998922	1.46381	0.684806	1.14969	NC
388550	CEACAM22P	0.0248747	-0.386058	1.03747	0.626542	NC	0.897661	1.5881	1.91026	2.6007	U	0.0944765	-0.441655	-0.595958	-1.13209	NC	0.967263	0.431131	1.3782	0.842065	NC
388796	SNHG17	-0.616368	-0.614047	-0.152003	-0.149682	NC	-2.13327	-1.80206	-1.6689	-1.3377	D	0.685532	0.720921	0.354326	0.389715	NC	-0.831366	-0.795978	-0.833688	-0.798299	NC
389289	ANXA2R	-0.025091	-0.303392	0.547488	0.269187	NC	1.40881	1.33184	1.98138	1.90442	U	-0.408806	-0.823843	-0.331844	-0.746881	NC	1.02509	0.610053	1.30339	0.888355	NC
3925	STMN1	0.226598	0.319659	0.265673	0.358734	NC	1.42813	1.79845	1.46721	1.83753	U	-0.296452	-0.237641	-0.666773	-0.607962	NC	0.905081	0.963891	0.81202	0.870831	NC
4016	LOXL1	-0.632268	-0.936274	-0.978196	-1.2822	NC	-1.36923	-1.21004	-1.71516	-1.55596	D	0.282934	-0.383329	0.123735	-0.542527	NC	-0.454032	-1.12029	-0.150025	-0.816288	NC
4216	MAP3K4	0.089672	-0.0410551	-0.335449	-0.466176	NC	-1.06808	-1.50346	-1.4932	-1.92859	D	0.203214	0.0709665	0.6386	0.506353	NC	-0.954536	-1.08678	-0.823809	-0.956057	NC
4286	MITF	-1	-0.0801703	-1.57191	-0.652077	NC	-0.817136	-1.5656	-1.38904	-2.1375	D	0.162271	0.561879	0.910733	1.31034	NC	0.345135	0.744743	-0.574694	-0.175087	NC
4330	MN1	0.879706	0.263034	0.436099	-0.180572	NC	1.81558	1.69599	1.37197	1.25239	U	-0.528694	-0.904843	-0.409113	-0.785261	NC	0.407175	0.0310269	1.02385	0.647698	NC
435	ASL	0.233512	0.151812	0.710199	0.628499	NC	1.09317	1.3337	1.56986	1.81038	U	0.0115665	0.221499	-0.22896	-0.0190282	NC	0.871223	1.08116	0.952923	1.16286	NC
4363	ABCC1	0.123128	-0.170341	-0.100214	-0.393682	NC	-1.05649	-1.87484	-1.27984	-2.09818	D	0.0936854	0.26265	0.912029	1.08099	NC	-1.08594	-0.916973	-0.792469	-0.623504	NC
440894	LINC01123	-0.453646	-0.204286	-0.908704	-0.659345	NC	-1.72213	-2.1299	-2.17719	-2.58496	D	0.533035	0.263945	0.940804	0.671714	NC	-0.735454	-1.00454	-0.984814	-1.2539	NC
440896	LOC440896	1.29546	1.04307	1.09192	0.839535	NC	2.03242	2.47917	1.82889	2.27563	U	-0.206451	-0.633872	-0.653197	-1.08062	NC	0.530515	0.103093	0.782902	0.355481	NC
4439	MSH5	1.34104	1.18662	1.18492	1.0305	NC	1.67377	1.72038	1.51765	1.56426	U	-0.183446	-0.258734	-0.230057	-0.305345	NC	0.149289	0.0740006	0.303704	0.228416	NC
4521	NUDT1	0.931885	1.18386	1.11059	1.36257	NC	2.24866	1.82525	2.42737	2.00396	U	-0.222638	-0.568843	0.200774	-0.14543	NC	1.09414	0.747937	0.842162	0.495957	NC
467	ATF3	-0.735885	-1.1328	-0.496323	-0.893234	NC	-1.67369	-1.51241	-1.43413	-1.27284	D	-0.129254	0.413979	-0.290535	0.252699	NC	-1.06706	-0.523823	-0.670145	-0.126912	NC
4678	NASP	0.359403	0.192645	0.70044	0.533682	NC	0.979517	1.64169	1.32055	1.98272	U	0.189203	0.413834	-0.472966	-0.248335	NC	0.809316	1.03395	0.976074	1.20071	NC
4758	NEU1	0.629339	0.700571	0.786486	0.857718	NC	1.8376	1.68362	1.99474	1.84077	U	-0.498993	-0.602062	-0.34502	-0.448089	NC	0.709264	0.606195	0.638032	0.534963	NC
4772	NFATC1	0.588744	-0.106042	0.544006	-0.15078	NC	1.90006	1.5427	1.85532	1.49796	U	-0.764622	-1.08139	-0.40726	-0.724027	NC	0.546692	0.229926	1.24148	0.924712	NC
4856	NOV	-0.371559	0.120294	-0.472488	0.0193653	NC	-1.7866	-1.10852	-1.88753	-1.20945	D	0.693022	0.847997	0.0149503	0.169925	NC	-0.722015	-0.567041	-1.21387	-1.05889	NC
4900	NRGN	0.399607	-0.256908	1.38941	0.732896	NC	0.51866	1.33618	1.50846	2.32599	U	0.54636	-0.0143553	-0.271162	-0.831877	NC	0.665412	0.104697	1.32193	0.761213	NC
4947	OAZ2	-0.239291	-0.0644167	-0.429098	-0.254224	NC	1.44574	1.22527	1.25593	1.03546	U	-0.635324	-0.561791	-0.414858	-0.341324	NC	1.0497	1.12324	0.874828	0.948362	NC
5002	SLC22A18	0.937978	1.10334	-0.0691462	0.0962153	NC	2.29598	2.2799	1.28886	1.27277	U	-0.371114	-0.598845	-0.355027	-0.582758	NC	0.986893	0.759161	0.821532	0.5938	NC
5026	P2RX5	-0.228129	-0.117523	-0.536251	-0.425646	NC	-1.49923	-1.52725	-1.80735	-1.83537	D	0.0939761	0.194378	0.121991	0.222392	NC	-1.17713	-1.07673	-1.28773	-1.18733	NC
5062	PAK2	-0.261807	-0.116501	-0.66034	-0.515034	NC	-0.900118	-1.84734	-1.29865	-2.24587	D	-0.361689	-0.419451	0.585529	0.527767	NC	-1	-1.05776	-1.14531	-1.20307	NC
51012	SLMO2	-0.0871403	0.301296	-0.363741	0.0246954	NC	-1.1071	-1.65992	-1.3837	-1.93653	D	-0.055797	0.399994	0.497029	0.95282	NC	-1.07576	-0.619965	-1.46419	-1.0084	NC
51058	ZNF691	-0.0138944	0.526965	0.023459	0.564318	NC	-1.58958	-1.95017	-1.55223	-1.91282	D	1.15131	0.742504	1.5119	1.10309	NC	-0.424375	-0.833181	-0.965235	-1.37404	NC
51093	RRNAD1	-0.147241	-0.0688038	0.00206838	0.080506	NC	1.40849	1.42943	1.5578	1.57874	U	-0.464626	-0.49304	-0.485565	-0.513979	NC	1.09111	1.06269	1.01267	0.984254	NC
51095	TRNT1	-0.207	-0.245995	-0.41091	-0.449904	NC	-1.41663	-1.85947	-1.62053	-2.06338	D	1.0158	0.612243	1.45865	1.05509	NC	-0.193823	-0.597382	-0.154829	-0.558388	NC
51099	ABHD5	-0.256662	0.167019	-0.321928	0.101753	NC	1.54573	1.97659	1.48046	1.91132	U	-1.04545	-0.582479	-1.47631	-1.01334	NC	0.756941	1.21991	0.33326	0.796232	NC
51111	SUV420H1	-0.0161454	0.150167	-0.552119	-0.385807	NC	-1.20416	-1.10216	-1.74013	-1.63813	D	0.201864	0.111814	0.0998639	0.00981429	NC	-0.98615	-1.0762	-1.15246	-1.24251	NC
51134	CEP83	-0.024578	-0.137991	-0.306978	-0.420391	NC	-1.8696	-1.70166	-2.152	-1.98406	D	0.888969	0.779091	0.721024	0.611146	NC	-0.956057	-1.06593	-0.842644	-0.952521	NC
51141	INSIG2	-0.27208	0.199672	-0.723291	-0.251539	NC	-1.35614	-1.19265	-1.80735	-1.64386	D	0.526069	0.910733	0.36257	0.747234	NC	-0.557995	-0.173332	-1.02975	-0.645083	NC
51181	DCXR	-0.464618	-0.218059	0.138023	0.384583	NC	0.985019	1.23169	1.58766	1.83433	U	-0.423039	-0.880638	-0.669706	-1.12731	NC	1.0266	0.568999	0.780039	0.322439	NC
51185	CRBN	-0.117791	-0.0215011	0.0280598	0.12435	NC	-1.30285	-1.47607	-1.157	-1.33022	D	0.405794	0.471824	0.579013	0.645043	NC	-0.779263	-0.713233	-0.875553	-0.809523	NC
51366	UBR5	0.047618	-0.205706	-0.461134	-0.714458	NC	-0.890045	-1.32193	-1.3988	-1.83068	D	0.169127	0.346128	0.60101	0.778011	NC	-0.768536	-0.591535	-0.515211	-0.338211	NC
51447	IP6K2	-0.350999	-0.229431	-0.267817	-0.146248	NC	1.17552	1.24847	1.2587	1.33165	U	-0.444839	-0.396648	-0.517787	-0.469596	NC	1.08168	1.12987	0.960113	1.0083	NC
51542	VPS54	0.0509239	0.16576	-0.544559	-0.429723	NC	-1.19388	-1.62882	-1.78936	-2.2243	D	0.0517614	0.439532	0.486698	0.874469	NC	-1.19304	-0.805272	-1.30788	-0.920107	NC
51571	FAM49B	-0.0570206	-0.023322	-0.132755	-0.0990567	NC	-1.21066	-1.25292	-1.28639	-1.32865	D	0.203573	0.337902	0.24583	0.38016	NC	-0.950066	-0.815736	-0.983764	-0.849434	NC
51633	OTUD6B	-0.459856	-0.300866	-0.386748	-0.227759	NC	-1.40939	-2.16146	-1.33628	-2.08836	D	0	-0.0551416	0.752072	0.696931	NC	-0.949535	-1.00468	-1.10852	-1.16367	NC
51645	PPIL1	0.387053	0.490576	0.588661	0.692184	NC	-1.40272	-1.31407	-1.20111	-1.11246	D	0.736697	0.834941	0.648048	0.746292	NC	-1.05307	-0.954828	-1.15659	-1.05835	NC
51719	CAB39	-0.631385	-0.565902	-0.942	-0.876517	NC	-1.4742	-1.84781	-1.78482	-2.15843	D	-0.177135	0.0326283	0.196477	0.406241	NC	-1.01995	-0.810188	-1.08544	-0.875672	NC
51807	TUBA8	-0.907882	-1.13276	-0.168271	-0.393145	NC	-1.28863	-2.27898	-0.549016	-1.53937	D	-0.844129	-0.348804	0.146221	0.641546	NC	-1.22487	-0.729548	-1	-0.504675	NC
5198	PFAS	-0.0995357	-0.121395	-0.30227	-0.324129	NC	-1.39993	-1.28445	-1.60266	-1.48719	D	0.332575	0.434937	0.217098	0.31946	NC	-0.96782	-0.865458	-0.94596	-0.843598	NC
526	ATP6V1B2	0.9552	1	0.802678	0.847478	NC	1.56522	1.47973	1.4127	1.32721	U	0.431746	0.515099	0.517238	0.60059	NC	1.04177	1.12512	0.99697	1.08032	NC
5260	PHKG1	0.00659519	0.0310621	0.432137	0.456604	NC	0.874018	1.43779	1.29956	1.86333	U	0.0967679	-0.328707	-0.467	-0.892475	NC	0.964191	0.538717	0.939724	0.51425	NC
5291	PIK3CB	0.135352	0.334174	-0.409644	-0.210822	NC	-1.03835	-1.60161	-1.58334	-2.14661	D	-0.0146468	0.228624	0.548621	0.791892	NC	-1.18834	-0.945074	-1.38717	-1.1439	NC
5325	PLAGL1	0.403129	0.647852	0.628102	0.872825	NC	1.50183	1.17918	1.72681	1.40415	U	-0.197961	-0.451669	0.124696	-0.129013	NC	0.900743	0.647034	0.65602	0.402312	NC
5337	PLD1	1.35614	1.05658	0.142019	-0.157541	NC	2.43296	1.54597	1.21883	0.331844	U	-1.21883	-1.09954	-0.331844	-0.212545	NC	-0.142019	-0.0227201	0.157541	0.27684	NC
5352	PLOD2	-0.334009	-0.162623	-0.764118	-0.592732	NC	-1.22673	-1.48655	-1.65684	-1.91666	D	0.00831869	0.235865	0.268139	0.495685	NC	-0.884399	-0.656853	-1.05579	-0.828239	NC
5361	PLXNA1	0.421712	-0.21565	0.0879927	-0.54937	NC	-1.22131	-1.8025	-1.55503	-2.13622	D	0.671201	0.535596	1.25239	1.11678	NC	-0.971823	-1.10743	-0.33446	-0.470065	NC
53916	RAB4B	0.499306	0.52968	0.23567	0.266043	NC	1.5631	1.32986	1.29947	1.06622	U	-0.200533	-1.22607	0.0327091	-0.992826	NC	0.863264	-0.162271	0.83289	-0.192645	NC
54014	BRWD1	-0.43078	-0.205161	-0.759403	-0.533784	NC	-1.47207	-1.00673	-1.80069	-1.33535	D	-0.0962153	0.158504	-0.561558	-0.306839	NC	-1.1375	-0.882784	-1.36312	-1.1084	NC
54093	SETD4	-0.517684	-0.287896	-0.0509839	0.178803	NC	-2.05166	-1.74585	-1.58496	-1.27915	D	0.949016	0.938599	0.643208	0.632791	NC	-0.584963	-0.595379	-0.81475	-0.825166	NC
54434	SSH1	0.0772526	-0.107698	-0.413107	-0.598058	NC	-1.43622	-1.84759	-1.92658	-2.33795	D	0.595934	0.697896	1.0073	1.10927	NC	-0.917538	-0.815575	-0.732587	-0.630625	NC
54475	NLE1	0.112585	-0.426127	0.0562566	-0.482455	NC	-1.55652	-1.74361	-1.61285	-1.79994	D	0.324525	0.827636	0.511611	1.01472	NC	-1.34458	-0.841473	-0.805871	-0.302761	NC
54677	CROT	0.225881	1.35576	-0.1676	0.96228	NC	1.39348	1.85207	1	1.45859	U	-0.824913	-0.514573	-1.2835	-0.973158	NC	0.342687	0.653027	-0.787194	-0.476854	NC
54760	PCSK4	0.649313	-0.110424	0.230484	-0.529253	NC	1.87309	1.28813	1.45426	0.869296	U	-1.0679	-1.11203	-0.482942	-0.527064	NC	0.155871	0.111748	0.915608	0.871485	NC
54799	MBTD1	-0.0869356	-0.13245	-0.330861	-0.376376	NC	-1.11407	-1.6105	-1.358	-1.85442	D	-0.195256	-0.0749621	0.30117	0.421464	NC	-1.22239	-1.1021	-1.17688	-1.05658	NC
54815	GATAD2A	0.0200004	-0.165188	-0.0605886	-0.245777	NC	-1.2364	-1.74538	-1.31699	-1.82597	D	0.129101	-0.0826232	0.638079	0.426355	NC	-1.1273	-1.33903	-0.942114	-1.15384	NC
54868	TMEM104	0.239273	-0.0887442	-0.115077	-0.443094	NC	-1.01235	-1.34569	-1.3667	-1.70004	D	0.242915	-0.0462038	0.576256	0.287137	NC	-1.00871	-1.29783	-0.680689	-0.969808	NC
54906	FAM208B	-0.113105	-0.391913	-0.916384	-1.19519	NC	-1.13285	-1.46332	-1.93613	-2.2666	D	0.0392213	0.208532	0.369695	0.539005	NC	-0.980523	-0.811212	-0.701715	-0.532404	NC
55001	TTC22	0.224999	-0.326501	-0.576256	-1.12776	NC	-1.86638	-1.53119	-2.66763	-2.33245	D	1.11718	0.420576	0.781999	0.0853915	NC	-0.974191	-1.6708	-0.422691	-1.1193	NC
55035	NOL8	0.239786	0.243623	-0.0133849	-0.00954798	NC	-1.43944	-0.953133	-1.69261	-1.2063	D	1.05137	1.1913	0.565063	0.704993	NC	-0.627857	-0.487926	-0.631694	-0.491763	NC
55068	ENOX1	0.0627358	-0.791413	-0.635236	-1.48938	NC	-0.584963	-2.16993	-1.28293	-2.8679	D	-0.584963	-0.383329	1	1.20163	NC	-1.23266	-1.03103	-0.378512	-0.176878	NC
55127	HEATR1	0.0713795	0.0639365	-0.343194	-0.350637	NC	-1.03916	-1.75215	-1.45373	-2.16672	D	0.112303	0.243179	0.825297	0.956173	NC	-0.998234	-0.867357	-0.990791	-0.859914	NC
55312	RFK	0.023243	0.445673	-0.0453919	0.377038	NC	-1.66408	-1.37217	-1.73272	-1.4408	D	0.719892	1.04182	0.427977	0.749905	NC	-0.967432	-0.645504	-1.38986	-1.06793	NC
55327	LIN7C	-0.0246922	0.197446	-0.551975	-0.329837	NC	-1.2578	-1.27462	-1.78508	-1.80191	D	0.65701	0.76922	0.673835	0.786044	NC	-0.576095	-0.463886	-0.798234	-0.686024	NC
55379	LRRC59	-0.238988	-0.118637	-0.381853	-0.261501	NC	-1.30896	-1.45284	-1.45182	-1.59571	D	0.180898	0.138593	0.324778	0.282473	NC	-0.889074	-0.931379	-1.00943	-1.05173	NC
55588	MED29	0.125165	-0.0825268	0.0979534	-0.109738	NC	1.82684	1.27888	1.79963	1.25167	U	-1.03765	-0.541639	-0.48969	0.00632564	NC	0.664025	1.16004	0.871716	1.36773	NC
55592	GOLGA2P5	-0.250962	0.784662	-0.536053	0.499571	NC	1.38131	1.97246	1.09622	1.68737	U	-0.534657	-0.0715533	-1.12581	-0.662708	NC	1.09761	1.56071	0.0619869	0.525091	NC
55603	FAM46A	0.630316	0.60498	0.705681	0.680346	NC	1.21621	1.40093	1.29157	1.4763	U	0.383081	0.425227	0.198359	0.240505	NC	0.968973	1.01112	0.994309	1.03645	NC
55635	DEPDC1	0.30895	0.382371	0.444302	0.517723	NC	-1.46123	-1.89616	-1.32588	-1.76081	D	0.764372	0.939458	1.19931	1.3744	NC	-1.00581	-0.830719	-1.07923	-0.90414	NC
55689	YEATS2	0.0244371	-0.357434	-0.188445	-0.570316	NC	-1.18374	-1.64694	-1.39662	-1.85982	D	0.600667	0.346692	1.06387	0.809897	NC	-0.607505	-0.86148	-0.225634	-0.47961	NC
55760	DHX32	0.169925	0.0816206	0.305503	0.217198	NC	-1.23252	-1.33994	-1.09695	-1.20436	D	0.556652	0.799013	0.664065	0.906426	NC	-0.845796	-0.603435	-0.757492	-0.515131	NC
55765	C1orf106	-0.398432	-0.739378	-0.488051	-0.828997	NC	-1.39775	-1.87017	-1.48737	-1.95979	D	0.0148942	0.174153	0.487314	0.646573	NC	-0.984425	-0.825166	-0.643479	-0.48422	NC
55902	ACSS2	0.234221	0.136762	0.32505	0.227591	NC	1.50509	1.3513	1.59592	1.44213	U	-0.352106	-0.141702	-0.198315	0.0120888	NC	0.91876	1.12916	1.01622	1.22662	NC
5606	MAP2K3	-0.306876	-0.374676	-0.28459	-0.35239	NC	1.39556	1.51664	1.41784	1.53892	U	-0.52644	-0.671451	-0.647522	-0.792532	NC	1.17599	1.03098	1.24379	1.09878	NC
56252	YLPM1	0.458693	0.111933	-0.456295	-0.803055	NC	-0.392656	-1.21879	-1.30764	-2.13378	D	0.167554	-0.179507	0.993686	0.646626	NC	-0.683795	-1.03086	-0.337035	-0.684096	NC
56652	C10orf2	-0.585554	-0.594454	-0.659318	-0.668218	NC	-1.53842	-1.53499	-1.61218	-1.60875	D	-0.027745	-0.148191	-0.0311759	-0.151622	NC	-0.980611	-1.10106	-0.971711	-1.09216	NC
56834	GPR137	-0.846029	-0.751813	-0.232472	-0.138257	NC	1.3001	0.933882	1.91366	1.54744	U	-1.17631	-1.43416	-0.810096	-1.06794	NC	0.969815	0.711968	0.875599	0.617752	NC
56995	TULP4	-0.0149503	-0.445095	-0.2062	-0.636345	NC	-1.28703	-1.6574	-1.47828	-1.84865	D	0.026967	0.28703	0.397335	0.657398	NC	-1.24511	-0.98505	-0.814968	-0.554905	NC
57088	PLSCR4	1.17971	1.45138	0.0395284	0.311202	NC	2.67991	2.24948	1.53973	1.1093	U	-1.11471	-0.0325259	-0.684277	0.397909	NC	0.385493	1.46768	0.11382	1.19601	NC
57095	PITHD1	0.330447	0.508481	0.548192	0.726225	NC	1.10648	1.41175	1.32422	1.62949	U	-0.134683	-0.166447	-0.439955	-0.47172	NC	0.641345	0.60958	0.463312	0.431547	NC
57120	GOPC	-0.511771	-0.572312	-0.737953	-0.798495	NC	-1.19909	-1.68664	-1.42528	-1.91283	D	-0.5025	-0.302828	-0.0149503	0.184722	NC	-1.18982	-0.990152	-1.12928	-0.929611	NC
57143	ADCK1	-0.243824	-0.18548	-0.72316	-0.664816	NC	-1.11677	-1.26691	-1.5961	-1.74624	D	0.802554	0.612654	0.952694	0.762795	NC	-0.0703893	-0.260289	-0.128733	-0.318633	NC
57182	ANKRD50	0.275992	-0.0501858	-0.219966	-0.546143	NC	-1.01238	-1.72741	-1.50834	-2.22336	D	0.186413	0.617752	0.901436	1.33278	NC	-1.10196	-0.670623	-0.775785	-0.344446	NC
57325	CSRP2BP	-0.781444	-0.624379	-0.514112	-0.357048	NC	-1.25768	-1.73161	-0.99035	-1.46428	D	-0.528379	-0.465053	-0.0544478	0.00887815	NC	-1.00462	-0.941291	-1.16168	-1.09836	NC
57396	CLK4	-0.183797	0.0978473	-0.174564	0.107081	NC	-1.50442	-1.66297	-1.49519	-1.65373	D	0.31013	0.789526	0.468675	0.948072	NC	-1.01049	-0.531096	-1.29214	-0.81274	NC
574029	DUSP5P1	-0.469485	-0.425764	-1.07566	-1.03194	NC	-1.848	-1.73697	-2.45418	-2.34314	D	1.05658	0.356144	0.945552	0.245112	NC	-0.321928	-1.02237	-0.365649	-1.06609	NC
57510	XPO5	0.177005	-0.0540968	-0.221973	-0.453075	NC	-1.4996	-1.60922	-1.89858	-2.0082	D	0.305413	0.497109	0.415037	0.606733	NC	-1.37119	-1.1795	-1.14009	-0.948394	NC
57541	ZNF398	0.250626	-0.22477	-0.345696	-0.821093	NC	-0.960626	-1.86405	-1.55695	-2.46037	D	-0.0916305	0.220806	0.811796	1.12423	NC	-1.30288	-0.990446	-0.827486	-0.515049	NC
57556	SEMA6A	0.858824	1.11736	0.532014	0.790547	NC	2.01217	1.94391	1.68536	1.6171	U	0.165878	-0.187459	0.234147	-0.119189	NC	1.31923	0.965892	1.0607	0.707359	NC
57560	IFT80	-0.805952	-0.443382	-0.794681	-0.432111	NC	1.22079	1.50415	1.23206	1.51542	U	-0.927204	-0.656557	-1.21057	-0.939919	NC	1.09954	1.37018	0.736966	1.00761	NC
57602	USP36	-0.272605	-0.745603	-0.51193	-0.984928	NC	-1.22615	-1.38835	-1.46548	-1.62767	D	0.17491	0.0108068	0.337107	0.173004	NC	-0.778637	-0.94274	-0.305639	-0.469742	NC
57617	VPS18	0.109585	-0.283015	0.028931	-0.363669	NC	-1.52133	-1.8859	-1.60198	-1.96655	D	0.51644	0.422024	0.881012	0.786596	NC	-1.11447	-1.20889	-0.721872	-0.816288	NC
57678	GPAM	0.0731664	-0.423401	-0.062061	-0.558628	NC	-1.52774	-1.94278	-1.66297	-2.078	D	0.693022	0.963474	1.10806	1.37851	NC	-0.907882	-0.63743	-0.411314	-0.140863	NC
57715	SEMA4G	0.525091	-0.313158	-0.20482	-1.04307	NC	2.23491	1.66482	1.50499	0.934905	U	-0.515641	-1.44271	0.0544478	-0.872621	NC	1.19417	0.267104	2.03242	1.10535	NC
57727	NCOA5	-0.019374	-0.0502596	-0.00907358	-0.0399591	NC	-1.3117	-1.49121	-1.3014	-1.48091	D	0.110323	0.136635	0.289834	0.316146	NC	-1.182	-1.15569	-1.15112	-1.12481	NC
5817	PVR	0.287228	0.221586	0.102098	0.0364561	NC	-1.23883	-1.52926	-1.42396	-1.71439	D	0.851969	0.939649	1.1424	1.23008	NC	-0.674088	-0.586409	-0.608446	-0.520766	NC
5822	PWP2	-0.084279	-0.588322	-0.0909737	-0.595016	NC	-1.55048	-1.61069	-1.55718	-1.61738	D	0.0502194	0.425808	0.110424	0.486012	NC	-1.41599	-1.0404	-0.911944	-0.536356	NC
58487	CREBZF	-0.153441	-0.0261128	-0.502289	-0.37496	NC	-1.09354	-1.58173	-1.44239	-1.93058	D	0.315009	0.885098	0.803199	1.37329	NC	-0.625091	-0.0550014	-0.752419	-0.18233	NC
5876	RABGGTB	-0.648316	-0.467021	-0.576751	-0.395456	NC	-1.64274	-1.43296	-1.57118	-1.36139	D	-0.142518	0.446124	-0.352302	0.23634	NC	-1.13695	-0.548304	-1.31824	-0.729599	NC
5887	RAD23B	-0.488009	-0.353001	-0.735564	-0.600556	NC	-1.38389	-1.87836	-1.63144	-2.12591	D	-0.13897	-0.131219	0.355498	0.36325	NC	-1.03485	-1.0271	-1.16986	-1.16211	NC
5926	ARID4A	0.912537	1.32962	0.779952	1.19704	NC	1.54057	2.21133	1.40798	2.07874	U	0.0874628	0.169925	-0.583298	-0.500835	NC	0.715494	0.797956	0.298409	0.380871	NC
5932	RBBP8	0.188803	0.0747678	-0.0940108	-0.208046	NC	-1.33958	-1.93988	-1.62239	-2.22269	D	0.372095	0.313023	0.972398	0.913326	NC	-1.15628	-1.21536	-1.04225	-1.10132	NC
5980	REV3L	0.212545	-0.0703893	-0.449215	-0.732149	NC	-0.96233	-1.33342	-1.62409	-1.99518	D	0.444481	0.800967	0.815575	1.17206	NC	-0.730393	-0.373908	-0.447459	-0.0909737	NC
5987	TRIM27	-0.329657	-0.284902	-0.292417	-0.247661	NC	-1.2429	-1.25417	-1.20566	-1.21693	D	0.0181298	-0.0645769	0.0294009	-0.0533058	NC	-0.895109	-0.977816	-0.939864	-1.02257	NC
5993	RFX5	-0.119795	-0.299118	-0.276503	-0.455827	NC	-1.33637	-1.31619	-1.49308	-1.4729	D	0.154034	0.130361	0.133856	0.110183	NC	-1.06254	-1.08621	-0.883218	-0.906891	NC
60	ACTB	-0.113721	-0.00741754	-0.020967	0.0853369	NC	-1.2592	-1.66862	-1.16644	-1.57586	D	0.366173	0.118493	0.775596	0.527916	NC	-0.779301	-1.02698	-0.885605	-1.13328	NC
6164	RPL34	-0.1697	-0.23383	0.414363	0.350233	NC	0.877083	1.72159	1.46115	2.30566	U	-0.138679	-0.050836	-0.98319	-0.895346	NC	0.908104	0.995947	0.972234	1.06008	NC
63897	HEATR6	-0.196006	-0.470932	-0.108836	-0.383763	NC	-1.22867	-1.82747	-1.1415	-1.7403	D	0.0698648	-0.0504294	0.66866	0.548365	NC	-0.962801	-1.0831	-0.687875	-0.808169	NC
63977	PRDM15	-0.181656	-0.60131	-0.552331	-0.971986	NC	-1.52916	-2.16789	-1.89984	-2.53857	D	0.237395	0.305413	0.876128	0.944147	NC	-1.11011	-1.04209	-0.690456	-0.622437	NC
64222	TOR3A	-0.094445	-0.171776	0.0960871	0.0187558	NC	-1.93947	-2.11693	-1.74894	-1.9264	D	0.940341	0.868994	1.1178	1.04645	NC	-0.904685	-0.976031	-0.827353	-0.8987	NC
64282	PAPD5	0.0639273	0.0231577	-0.00890555	-0.0496752	NC	-1.27146	-1.23804	-1.3443	-1.31087	D	0.483816	0.83289	0.450393	0.799467	NC	-0.851575	-0.5025	-0.810805	-0.461731	NC
643155	SMIM15	-0.208482	-0.0247108	-0.202817	-0.0190458	NC	-1.41033	-1.37813	-1.40467	-1.37247	D	0.224538	0.733957	0.192339	0.701758	NC	-0.977314	-0.467895	-1.16109	-0.651666	NC
64324	NSD1	0.468954	0.0608033	-0.12342	-0.531571	NC	-0.89263	-1.85758	-1.485	-2.44996	D	-0.0480943	0.224081	0.916859	1.18903	NC	-1.40968	-1.1375	-1.00153	-0.729352	NC
64328	XPO4	0.298523	0.357956	-0.218535	-0.159102	NC	-1.34843	-1.33442	-1.86548	-1.85148	D	0.475338	0.784044	0.461331	0.770037	NC	-1.17161	-0.862905	-1.23104	-0.922338	NC
645958	RPS18P9	-0.197939	0.691878	-0.819428	0.0703893	NC	1.64534	2.26919	1.02385	1.6477	U	-0.721284	0.198546	-1.34514	-0.425306	NC	1.12199	2.04182	0.232173	1.152	NC
64760	FAM160B2	-0.222775	-0.494938	-0.252288	-0.524452	NC	-1.60343	-2.22367	-1.63294	-2.25318	D	-0.0376581	0.256826	0.58258	0.877064	NC	-1.41831	-1.12383	-1.14615	-0.851665	NC
64782	AEN	-0.361169	-0.19717	-0.620928	-0.456929	NC	-2.11693	-1.70426	-2.37669	-1.96402	D	0.648201	0.758562	0.235531	0.345891	NC	-1.10756	-0.997201	-1.27156	-1.1612	NC
6493	SIM2	-0.549719	-0.533491	-1.13245	-1.11622	NC	-0.861888	-1.4611	-1.44462	-2.04384	D	-0.599216	-0.509949	0	0.0892673	NC	-0.911386	-0.822118	-0.927614	-0.838347	NC
65260	COA7	-0.487092	-0.754021	-0.54332	-0.810249	NC	-2.04891	-1.3382	-2.10514	-1.39443	D	0.64615	0.616505	-0.0645555	-0.094201	NC	-0.915667	-0.945312	-0.648738	-0.678384	NC
6595	SMARCA2	0.916825	0.580916	0.513962	0.178053	NC	2.00906	1.75024	1.6062	1.34738	U	-0.655954	-0.481817	-0.39713	-0.222993	NC	0.436285	0.610422	0.772194	0.946331	NC
65979	PHACTR4	-0.104492	-0.192719	-0.0625347	-0.150762	NC	1.25366	1.29279	1.29561	1.33475	U	-0.193172	-0.352048	-0.232307	-0.391184	NC	1.16498	1.0061	1.2532	1.09433	NC
6599	SMARCC1	-0.212994	-0.258967	-0.655352	-0.701325	NC	-0.827437	-1.24482	-1.2698	-1.68718	D	-0.354418	-0.0868982	0.062964	0.330484	NC	-0.968861	-0.701342	-0.922889	-0.655369	NC
6621	SNAPC4	-0.248082	-0.600739	-0.11223	-0.464886	NC	-1.63881	-1.25103	-1.50295	-1.11517	D	0.628031	0.385812	0.240252	-0.00196686	NC	-0.762693	-1.00491	-0.410037	-0.652256	NC
669	BPGM	-0.15277	-0.160465	-0.07112	-0.0788144	NC	1.42514	1.19652	1.50679	1.27817	U	-0.532587	-0.771653	-0.303969	-0.543035	NC	1.04532	0.806258	1.05302	0.813953	NC
6711	SPTBN1	0.315609	0.0688873	-0.229269	-0.475991	NC	-0.781688	-1.3615	-1.32657	-1.90638	D	0.161008	0.377121	0.740818	0.956931	NC	-0.936289	-0.720176	-0.689568	-0.473454	NC
6834	SURF1	0.212342	1.00736	-0.18786	0.607158	NC	1.3932	1.8637	0.992993	1.46349	U	-0.254351	0.0605223	-0.724851	-0.409977	NC	0.926502	1.24138	0.131484	0.446357	NC
6844	VAMP2	0.187672	0.29395	0.392774	0.499052	NC	1.62504	1.49804	1.83014	1.70314	U	-0.188118	-0.504598	-0.0611162	-0.377596	NC	1.24925	0.93277	1.14297	0.826492	NC
6890	TAP1	-0.128093	-0.0377581	-0.045436	0.044899	NC	1.21575	1.5344	1.29841	1.61705	U	-0.522849	-0.806107	-0.841493	-1.12475	NC	0.820996	0.537737	0.730661	0.447402	NC
692099	FAM86DP	-0.786086	-0.80023	-0.877026	-0.89117	NC	-1.15268	-2.64539	-1.24362	-2.73633	D	-0.499102	-0.382146	0.993602	1.11056	NC	-0.865699	-0.748743	-0.851555	-0.734599	NC
692196	SNORD76	0.116715	-0.806171	-1.00755	-1.93044	NC	-1.4238	-0.666812	-2.54807	-1.79108	D	0.621488	1.9118	-0.1355	1.15481	NC	-0.919027	0.37128	0.00385969	1.29417	NC
6942	TCF20	0.153745	-0.298323	-0.417747	-0.869815	NC	-0.73384	-1.60794	-1.30533	-2.17943	D	-0.504732	-0.242225	0.369366	0.631873	NC	-1.39232	-1.12981	-0.940249	-0.677742	NC
6944	VPS72	-0.105334	0.294023	0.137282	0.53664	NC	-1.34076	-1.49566	-1.09815	-1.25305	D	0.381313	0.612135	0.536213	0.767035	NC	-0.854115	-0.623293	-1.25347	-1.02265	NC
7024	TFCP2	0.198749	0.348825	0.071903	0.221979	NC	-1.10813	-1.32035	-1.23498	-1.4472	D	0.274895	0.17897	0.487115	0.391191	NC	-1.03198	-1.12791	-1.18206	-1.27798	NC
7042	TGFB2	-0.568843	0.55769	-0.963474	0.163058	NC	-1.32599	-0.861024	-1.72062	-1.25565	D	1	0.644669	0.535037	0.179706	NC	0.242857	-0.112475	-0.883676	-1.23901	NC
7076	TIMP1	-0.191531	-0.130926	0.330199	0.390804	NC	-1.45063	-1.84137	-0.9289	-1.31964	D	0.846596	0.191884	1.23733	0.582622	NC	-0.412503	-1.06722	-0.473109	-1.12782	NC
7127	TNFAIP2	-0.256565	0.318682	-0.410188	0.165059	NC	1.72639	2.09032	1.57277	1.9367	U	-0.670742	-1.0123	-1.03467	-1.37623	NC	1.31221	0.970656	0.736966	0.395409	NC
7187	TRAF3	0.290677	0.012824	-0.266103	-0.543956	NC	-0.714598	-1.20002	-1.27138	-1.7568	D	0.0313642	0.116696	0.516791	0.602123	NC	-0.973911	-0.888579	-0.696058	-0.610726	NC
7204	TRIO	-0.264546	-0.688686	-1.04137	-1.46551	NC	-0.876989	-1.251	-1.65381	-2.02782	D	-0.486121	-0.241008	-0.11211	0.133002	NC	-1.09856	-0.853451	-0.674424	-0.429312	NC
7263	TST	-0.503195	-0.465902	0.516936	0.554229	NC	1.13432	1.33255	2.15445	2.35268	U	-0.963284	-0.723871	-1.16152	-0.922102	NC	0.67423	0.913644	0.636937	0.87635	NC
728118	NUTM2A	0.781576	0.540568	0.932255	0.691247	NC	1.76062	1.1686	1.9113	1.31928	U	-0.417385	-0.117238	0.174632	0.47478	NC	0.561655	0.861803	0.802663	1.10281	NC
7283	TUBG1	0.731564	0.557748	0.880745	0.70693	NC	-1.36136	-1.40353	-1.21218	-1.25435	D	1.10125	0.775627	1.14342	0.817797	NC	-0.991674	-1.3173	-0.817859	-1.14348	NC
728622	SKP1P2	0.337633	0.354573	-0.145742	-0.128802	NC	1.53134	1.94514	1.04797	1.46176	U	-0.777253	-0.608747	-1.19105	-1.02254	NC	0.416457	0.584963	0.399517	0.568023	NC
7314	UBB	0.400988	0.550338	0.668944	0.818293	NC	1.32896	1.25856	1.59691	1.52651	U	0.206692	-0.13314	0.277092	-0.0627411	NC	1.13466	0.79483	0.985313	0.64548	NC
731424	LOC731424	0.479352	-0.0256866	1.62196	1.11692	NC	0.760534	1.50649	1.90314	2.64909	U	-0.209923	0.380822	-0.955877	-0.365133	NC	0.0712587	0.662004	0.576298	1.16704	NC
7567	ZNF19	-1.60666	-0.780687	-1.15528	-0.329308	NC	-1.81816	-1.81816	-1.36678	-1.36678	D	0	-0.0780025	0	-0.0780025	NC	-0.211504	-0.289507	-1.03747	-1.11548	NC
7692	ZNF133	-0.710782	-0.498806	-0.43948	-0.227504	NC	-2.7212	-1.89899	-2.4499	-1.62768	D	1.03103	1.15826	0.208814	0.336049	NC	-0.97939	-0.852155	-1.19137	-1.06413	NC
7783	ZP2	1	1.1375	0.678072	0.815575	NC	2.53605	2.81762	2.21412	2.4957	U	-0.465664	-0.465664	-0.747234	-0.747234	NC	1.07039	1.07039	0.932886	0.932886	NC
78987	CRELD1	0.275341	-0.0169531	-0.0891002	-0.381395	NC	1.73629	1.36444	1.37185	1	U	-0.27441	-0.584457	0.0974395	-0.212607	NC	1.18654	0.876493	1.47883	1.16879	NC
79083	MLPH	-0.695286	-0.724237	-0.84108	-0.870031	NC	-1.8893	-1.97949	-2.03509	-2.12529	D	0.390234	0.406817	0.480432	0.497015	NC	-0.803777	-0.787194	-0.774825	-0.758242	NC
79180	EFHD2	-0.326558	-0.420152	-0.137491	-0.231084	NC	-1.68756	-1.9074	-1.4985	-1.71833	D	0.77995	0.674001	0.999787	0.893838	NC	-0.581056	-0.687005	-0.487462	-0.593412	NC
79623	GALNT14	-0.24716	-0.197037	-0.105353	-0.0552295	NC	-1.26181	-1.60973	-1.12	-1.46792	D	0.852896	0.670692	1.20082	1.01862	NC	-0.161751	-0.343954	-0.211875	-0.394078	NC
79629	OCEL1	0.115679	0.28426	0.07184	0.240422	NC	1.49633	1.50558	1.45249	1.46174	U	-0.481997	-0.724184	-0.491248	-0.733435	NC	0.898651	0.656464	0.730069	0.487882	NC
79648	MCPH1	0.22788	-0.234387	0.080397	-0.381871	NC	-1.48995	-1.31795	-1.63743	-1.46544	D	0.346325	0.573735	0.17433	0.401741	NC	-1.3715	-1.14409	-0.909235	-0.681824	NC
79709	COLGALT1	0.0441968	-0.0906123	0.00358901	-0.13122	NC	-1.30001	-1.40656	-1.34061	-1.44716	D	0.749049	0.631723	0.855598	0.738271	NC	-0.595155	-0.712481	-0.460346	-0.577672	NC
79971	WLS	0.29485	0.454964	0.00802242	0.168136	NC	1.46685	1.5356	1.18002	1.24877	U	-0.475049	-0.170665	-0.543803	-0.239419	NC	0.696948	1.00133	0.536835	0.841219	NC
80014	WWC2	0.393296	0.252032	-0.262513	-0.403777	NC	-0.603578	-1.2854	-1.25939	-1.94121	D	0.114035	0.170619	0.795859	0.852443	NC	-0.882839	-0.826255	-0.741575	-0.684991	NC
80209	PROSER1	0.175645	-0.010983	-0.254359	-0.440987	NC	-0.97367	-2.02046	-1.40367	-2.45047	D	-0.00923821	-0.211181	1.03756	0.835613	NC	-1.15855	-1.3605	-0.971925	-1.17387	NC
80216	ALPK1	0.692333	0.316184	1.25831	0.882164	NC	1.20454	0.880536	1.77052	1.44652	U	0.0123837	0.284977	0.336386	0.608979	NC	0.52459	0.797183	0.900738	1.17333	NC
81610	FAM83D	0.97283	1.16753	1.00917	1.20387	NC	1.795	1.43376	1.83134	1.4701	U	0.125703	0.0765321	0.486944	0.437773	NC	0.947871	0.8987	0.75317	0.703999	NC
81691	LOC81691	0.774933	0.917538	0.384143	0.526748	NC	1.94278	1.87447	1.55199	1.48368	U	-0.748128	-0.140007	-0.679822	-0.0717015	NC	0.419714	1.02783	0.27711	0.88523	NC
81793	TLR10	-1.01134	-0.846491	-0.61502	-0.450166	NC	-1.74831	-1.50438	-1.35199	-1.10806	D	0.576501	0.634716	0.332575	0.39079	NC	-0.160465	-0.10225	-0.325319	-0.267104	NC
81854	ZNF205-AS1	0.331075	0.719528	0.568843	0.957296	NC	1.42899	2.07209	1.66676	2.30986	U	0.465272	0.0774045	-0.177827	-0.565694	NC	1.56319	1.17532	1.17473	0.786866	NC
81928	CABLES2	0.451874	0.357956	0.554968	0.46105	NC	1.40255	1.20451	1.50564	1.30761	U	-0.398407	-0.223438	-0.200375	-0.0254066	NC	0.552265	0.727234	0.646183	0.821152	NC
8289	ARID1A	0.247336	0.040642	0.0229105	-0.183783	NC	-1.05111	-1.54651	-1.27553	-1.77093	D	0.512242	0.372886	1.00764	0.868286	NC	-0.786202	-0.925558	-0.579508	-0.718864	NC
8325	FZD8	-0.0393263	0.0915932	0.13713	0.268049	NC	-1.25096	-1.38702	-1.07451	-1.21057	D	0.822118	0.694212	0.95818	0.830273	NC	-0.389517	-0.517424	-0.520436	-0.648343	NC
83596	BCL2L12	0.767882	0.701107	1.06144	0.99467	NC	1.50281	1.74476	1.79637	2.03832	U	0.213174	0.0850464	-0.0287764	-0.156904	NC	0.948099	0.819971	1.01487	0.886746	NC
83874	TBC1D10A	1.30875	0.976864	0.750262	0.418373	NC	2.0163	1.70849	1.45781	1.15	U	-0.823247	-0.65811	-0.515433	-0.350297	NC	-0.115698	0.0494389	0.216191	0.381328	NC
83882	TSPAN10	0.22556	-0.0450879	0.756074	0.485427	NC	1.28141	0.784987	1.81193	1.3155	U	-0.57586	-1.4458	-0.0794345	-0.949374	NC	0.479993	-0.389947	0.750641	-0.119299	NC
83932	SPRTN	-0.147613	-0.0624959	-0.571616	-0.4865	NC	-1.25514	-1.78327	-1.67914	-2.20728	D	0.474961	0.514573	1.00309	1.0427	NC	-0.632567	-0.592955	-0.717684	-0.678072	NC
8406	SRPX	0.390617	0.86003	0.290515	0.759928	NC	1.27671	1.49076	1.1766	1.39066	U	-0.202195	-0.236488	-0.416247	-0.45054	NC	0.683893	0.6496	0.21448	0.180187	NC
84069	PLEKHN1	-0.47037	-1.3181	-0.103688	-0.95142	NC	-1.94548	-1.90187	-1.5788	-1.53519	D	0.86065	0.520832	0.817039	0.477221	NC	-0.614461	-0.954279	0.23327	-0.106548	NC
84138	SLC7A6OS	-0.273441	-0.530765	-0.317835	-0.575159	NC	-1.15954	-1.26665	-1.20393	-1.31104	D	0.594165	0.166284	0.701274	0.273392	NC	-0.291931	-0.719812	-0.0346066	-0.462488	NC
84276	NICN1	-0.18175	-0.232734	-0.166953	-0.217937	NC	1.38979	1.22953	1.40459	1.24432	U	-0.535267	-0.439209	-0.375	-0.278942	NC	1.03628	1.13233	1.08726	1.18332	NC
84279	PRADC1	-0.133603	-0.162457	0.307714	0.278859	NC	1.285	1.29246	1.72632	1.73378	U	-0.462106	-0.481372	-0.469567	-0.488833	NC	0.956498	0.937233	0.985353	0.966087	NC
84336	TMEM101	0.743343	0.729642	0.367644	0.353943	NC	1.72689	1.80735	1.35119	1.43166	U	0.176347	0.20415	0.0958786	0.123682	NC	1.15989	1.18769	1.17359	1.20139	NC
84520	C14orf142	0.0227713	0.373458	0.411814	0.762501	NC	1.30079	1.21299	1.68983	1.60204	U	-0.103439	0.203253	-0.015643	0.291049	NC	1.17458	1.48127	0.823892	1.13058	NC
84681	HINT2	-1.0429	-0.232845	-0.423532	0.386525	NC	0.82432	1.3771	1.44369	1.99647	U	-0.985542	-0.455027	-1.53832	-1.0078	NC	0.88168	1.41219	0.0716229	0.602138	NC
84747	UNC119B	0.269321	0.340705	0.553936	0.62532	NC	1.22957	0.955212	1.51419	1.23983	U	-0.0271191	0.195664	0.247243	0.470027	NC	0.933135	1.15592	0.86175	1.08453	NC
84823	LMNB2	0.432647	0.148232	0.382004	0.0975884	NC	-1.62313	-1.6681	-1.67377	-1.71874	D	0.887319	1.078	0.932286	1.12297	NC	-1.16846	-0.977773	-0.884041	-0.693358	NC
84856	LINC00839	0.245756	-0.106915	0.647119	0.294447	NC	1.57116	0.836501	1.97252	1.23786	U	-0.3254	-0.490986	0.409255	0.243669	NC	1	0.834414	1.35267	1.18709	NC
84916	CIRH1A	0.362665	-0.036307	-0.770953	-1.16993	NC	-1.638	-0.855529	-2.77162	-1.98915	D	0.947237	1.29782	0.164767	0.515345	NC	-1.05343	-0.702848	-0.654455	-0.303877	NC
84938	ATG4C	0.202493	0.298015	0.0703893	0.165912	NC	-1.39541	-1.20114	-1.52751	-1.33324	D	0.554312	0.744743	0.360043	0.550474	NC	-1.04359	-0.853159	-1.13911	-0.948681	NC
85013	TMEM128	0.146841	0.359705	0.523146	0.73601	NC	0.99262	1.34674	1.36893	1.72304	U	-0.164387	0.113769	-0.518506	-0.240351	NC	0.681392	0.959548	0.468529	0.746685	NC
8502	PKP4	-0.00141788	-0.110408	-0.187316	-0.296306	NC	-1.18739	-1.46796	-1.37329	-1.65386	D	0.12956	0.337976	0.410129	0.618545	NC	-1.05641	-0.847997	-0.947423	-0.739007	NC
85377	MICALL1	-0.642317	-1.00393	-0.882501	-1.24412	NC	-1.12875	-2.00322	-1.36893	-2.2434	D	-0.499706	-0.620528	0.374764	0.253941	NC	-0.986136	-1.10696	-0.624521	-0.745343	NC
865	CBFB	-0.0142011	0.307727	-0.553484	-0.231556	NC	-0.758103	-1.40522	-1.29739	-1.9445	D	-0.14142	0.492239	0.505699	1.13936	NC	-0.885321	-0.251662	-1.20725	-0.57359	NC
8654	PDE5A	0.671377	1.24511	0.0687128	0.642448	NC	-0.667425	-1.29546	-1.27009	-1.89812	D	0.866733	0.160465	1.49476	0.788496	NC	-0.472068	-1.17834	-1.0458	-1.75207	NC
8692	HYAL2	-0.00847152	-0.00507694	-0.0809509	-0.0775563	NC	-2.01699	-1.66395	-2.08947	-1.73643	D	0.979341	1.1646	0.626298	0.811555	NC	-1.02918	-0.843924	-1.03258	-0.847319	NC
8718	TNFRSF25	-0.0604754	-0.593781	0.154686	-0.378619	NC	-2.18014	-2.26211	-1.96498	-2.04695	D	0.991588	1.0146	1.07356	1.09657	NC	-1.12808	-1.10506	-0.594772	-0.571755	NC
8878	SQSTM1	0.615749	0.616029	0.719835	0.720114	NC	1.99641	1.91461	2.10049	2.01869	U	-0.391952	-0.436645	-0.310149	-0.354843	NC	0.988708	0.944014	0.988428	0.943735	NC
8935	SKAP2	0.95202	1.02672	0.649093	0.72379	NC	1.81695	1.67849	1.51403	1.37557	U	0.191449	0.304217	0.329909	0.442677	NC	1.05638	1.16915	0.981685	1.09445	NC
89894	TMEM116	-0.239951	0.608046	-0.156119	0.691878	NC	1.55756	1.64943	1.64139	1.73326	U	-0.76356	-0.45647	-0.855433	-0.548344	NC	1.03395	1.34104	0.18595	0.49304	NC
9025	RNF8	-0.381871	-0.296982	-0.356485	-0.271596	NC	-1.27652	-1.23644	-1.25113	-1.21105	D	0.231075	0.358048	0.190997	0.31797	NC	-0.663572	-0.536599	-0.748461	-0.621488	NC
91050	CCDC149	-0.991335	-0.647119	-1.29225	-0.948037	NC	-1.28758	-1.34162	-1.58849	-1.64253	D	-0.400962	0.270089	-0.346922	0.324129	NC	-0.697204	-0.0261523	-1.04142	-0.370368	NC
9129	PRPF3	0.179613	0.01445	0.280845	0.115682	NC	-1.5345	-1.41162	-1.43326	-1.31039	D	0.800596	0.536973	0.677718	0.414095	NC	-0.913513	-1.17714	-0.748349	-1.01197	NC
9138	ARHGEF1	0.0798449	-0.137321	0.14439	-0.0727761	NC	-1.24088	-1.66949	-1.17633	-1.60494	D	-0.0697858	0.174421	0.358825	0.603032	NC	-1.39051	-1.1463	-1.17334	-0.929133	NC
91526	ANKRD44	0.440573	0	0.662965	0.222392	NC	1.51457	1	1.73697	1.22239	U	-1.62149	-0.621488	-1.10692	-0.106915	NC	-0.547488	0.452512	-0.106915	0.893085	NC
91612	CHURC1	0.491355	0.70167	0.473868	0.684182	NC	1.20538	1.24371	1.1879	1.22622	U	-0.0167433	0.261878	-0.0550714	0.22355	NC	0.697286	0.975907	0.486971	0.765593	NC
92106	OXNAD1	0.307625	0.248949	0.171887	0.113211	NC	-1.40858	-1.08665	-1.54432	-1.22239	D	0.75743	0.991387	0.435502	0.669459	NC	-0.958777	-0.72482	-0.900101	-0.666144	NC
9232	PTTG1	0.849062	1.14127	0.983947	1.27616	NC	1.59653	1.27655	1.73141	1.41144	U	0.00379879	0.0771458	0.323773	0.397121	NC	0.751263	0.82461	0.45905	0.532397	NC
9266	CYTH2	-0.07032	-0.266505	0.111963	-0.0842216	NC	1.20846	1.27185	1.39074	1.45413	U	-0.303743	-0.531081	-0.36713	-0.594468	NC	0.975037	0.747698	1.17122	0.943883	NC
92906	HNRNPLL	-0.361099	-0.645467	-1.08356	-1.36793	NC	-0.492658	-1.80735	-1.21512	-2.52982	D	-0.21036	-0.881737	1.10434	0.432959	NC	-0.34192	-1.0133	-0.057551	-0.728928	NC
93622	LOC93622	-0.523247	-0.802319	-0.282239	-0.561311	NC	-1.30189	-1.73361	-1.06088	-1.4926	D	0.584963	0.649814	1.01668	1.08153	NC	-0.193681	-0.12883	0.0853915	0.150243	NC
9367	RAB9A	-0.386247	-0.293138	-0.396301	-0.303192	NC	-1.52623	-1.45129	-1.53629	-1.46135	D	0.166121	0.396544	0.091181	0.321603	NC	-0.973866	-0.743444	-1.06698	-0.836553	NC
9392	TGFBRAP1	0.103789	-0.0741776	-0.217466	-0.395433	NC	-1.11184	-1.36113	-1.43309	-1.68238	D	0.204633	0.00181585	0.453924	0.251107	NC	-1.011	-1.21381	-0.833028	-1.03585	NC
9412	MED21	0.327011	0.429813	-0.18097	-0.0781683	NC	-0.744055	-1.45519	-1.25204	-1.96318	D	0.0246621	0.164387	0.735802	0.875526	NC	-1.0464	-0.906679	-1.14921	-1.00948	NC
9425	CDYL	0.0683554	0.260186	-0.261405	-0.0695745	NC	-1.04685	-1.53298	-1.37661	-1.86274	D	0.398184	0.569596	0.884317	1.05573	NC	-0.717021	-0.54561	-0.908852	-0.737441	NC
9456	HOMER1	-0.0490482	0.262029	-0.258176	0.0529019	NC	1.51778	1.95666	1.30866	1.74753	U	-0.498821	-0.372629	-0.937694	-0.811502	NC	1.06801	1.1942	0.756934	0.883126	NC
9473	THEMIS2	-0.568734	-1.18799	-0.35826	-0.977516	NC	-1.67938	-2.36164	-1.4689	-2.15116	D	0.0310269	0.0310269	0.713287	0.713287	NC	-1.07962	-1.07962	-0.460361	-0.460361	NC
9501	RPH3AL	0.364875	-0.564352	1.23589	0.306661	NC	0.480972	1.40462	1.35199	2.27563	U	0.0582986	0.100527	-0.86535	-0.823122	NC	0.174396	0.216624	1.10362	1.14585	NC
9651	PLCH2	0.45799	0.590237	0.395929	0.528176	NC	1.25376	1.50343	1.1917	1.44137	U	-0.728128	-0.916061	-0.977804	-1.16574	NC	0.0676387	-0.120294	-0.0646091	-0.252542	NC
9730	VPRBP	0.110747	-0.0910645	-0.208108	-0.40992	NC	-0.903537	-1.44606	-1.22239	-1.76492	D	0.354573	0.326228	0.8971	0.868755	NC	-0.659711	-0.688056	-0.4579	-0.486244	NC
9747	TCAF1	0.0448026	0.147276	0.0703076	0.172781	NC	1.33668	1.58833	1.36219	1.61383	U	-0.466204	-0.351081	-0.717849	-0.602727	NC	0.825677	0.9408	0.723204	0.838326	NC
9790	BMS1	0.00451548	-0.380775	-0.15866	-0.54395	NC	-1.26865	-1.38904	-1.43183	-1.55222	D	0.225502	0.20296	0.345891	0.323349	NC	-1.04767	-1.07021	-0.662376	-0.684919	NC
9848	MFAP3L	0.35811	-0.100763	0.329766	-0.129108	NC	-1.26303	-1.76783	-1.29138	-1.79617	D	0.465664	0.777608	0.970456	1.2824	NC	-1.15548	-0.843537	-0.696608	-0.384664	NC
9853	RUSC2	-0.293425	-0.886713	-0.685936	-1.27922	NC	-1.52136	-1.50205	-1.91387	-1.89456	D	0.341242	0.154723	0.321928	0.135409	NC	-0.886695	-1.07321	-0.293408	-0.479927	NC
9870	AREL1	-0.100214	-0.415037	-0.44773	-0.762554	NC	-1.61566	-1.4252	-1.96318	-1.77271	D	0.407747	0.630766	0.217286	0.440304	NC	-1.1077	-0.884679	-0.792874	-0.569856	NC
9875	URB1	0.206451	-0.410933	-0.260806	-0.87819	NC	-0.788216	-1.47805	-1.25547	-1.9453	D	0.015883	0.301555	0.705715	0.991387	NC	-0.978784	-0.693111	-0.3614	-0.0757273	NC
9972	NUP153	0.421811	0.374589	-0.0101006	-0.0573218	NC	-1.33614	-1.55141	-1.76805	-1.98332	D	0.57253	0.725493	0.787798	0.940761	NC	-1.18542	-1.03246	-1.1382	-0.985239	NC
9991	PTBP3	0.229875	0.27949	-0.248442	-0.198827	NC	-1.0067	-2.02991	-1.48502	-2.50822	D	0.045324	0.419826	1.06853	1.44303	NC	-1.19125	-0.816748	-1.24087	-0.866363	NC
NM_001306144	-	0.351272	0.00984779	-0.118899	-0.460324	NC	-1.42164	-1.27096	-1.89181	-1.74113	D	1.0488	0.687143	0.89812	0.536464	NC	-0.724113	-1.08577	-0.382689	-0.744345	NC
NM_001308232	-	0.0347654	-0.321928	0.293583	-0.06311	NC	0.96197	1.25224	1.22079	1.51106	U	-0.233474	-0.512167	-0.523747	-0.802439	NC	0.69373	0.415037	1.05042	0.771731	NC
NM_001314057	-	-1.17951	-0.638492	-0.269033	0.271986	NC	-1.34763	-2.33151	-0.437156	-1.42104	D	-0.630243	0.318682	0.353637	1.30256	NC	-0.798366	0.15056	-1.33939	-0.390459	NC
NM_001319052	-	0.386596	0.828484	0.16161	0.603498	NC	1.68668	1.55188	1.46169	1.32689	U	0.150987	-0.253583	0.285784	-0.118786	NC	1.45107	1.0465	1.00918	0.60461	NC
NR_132781	-	0.488578	0.794681	0.977444	1.28355	NC	1.98768	1.7465	2.47655	2.23537	U	-0.138865	-0.455185	0.102312	-0.214008	NC	1.36024	1.04392	1.05413	0.737814	NC
NR_134504	-	0.343954	0.81526	-0.697073	-0.225767	NC	2.7047	1.55223	1.66367	0.511198	U	-1.16674	-0.835286	-0.0142607	0.31719	NC	1.19401	1.52546	0.722705	1.05416	NC
1001	CDH3	-0.800141	-1.27963	-1.73167	-2.21116	D	0.510013	-0.469485	-0.421517	-1.40102	NC	-1.66402	-0.548462	-0.684522	0.431037	NC	-0.353866	0.761692	0.125627	1.24119	NC
100132159	CALML3-AS1	-1.31034	-2.04731	-1.18903	-1.926	D	0.255257	-0.706269	0.376563	-0.584963	NC	-0.594744	-1.30256	0.366782	-0.341037	NC	0.970854	0.263034	1.70782	1	NC
100505633	LINC01133	-2.18322	-1.32939	-1.89684	-1.04301	D	-0.146133	-0.446256	0.140252	-0.159871	NC	-0.776562	-1.02586	-0.476438	-0.725738	NC	1.26053	1.01123	0.406698	0.157398	NC
100506444	LOC100506444	-1.43911	-1.23266	-1.25376	-1.04731	D	-0.208814	-0.453051	-0.023459	-0.267696	NC	0	-0.345775	0.244237	-0.101538	NC	1.2303	0.884523	1.02385	0.678072	NC
10051	SMC4	1.23432	1.22074	1.42243	1.40885	U	-0.0894519	0.11392	0.0986571	0.302029	NC	0.806036	1.13078	0.602665	0.927405	NC	-0.517737	-0.192996	-0.504155	-0.179415	NC
10381	TUBB3	1.94046	1.78682	2.1068	1.95316	U	-0.282341	-0.187523	-0.116003	-0.0211853	NC	1.06226	1.04414	0.967445	0.949323	NC	-1.16054	-1.17866	-1.0069	-1.02502	NC
10397	NDRG1	1.65723	1.58509	1.49069	1.41854	U	0.97568	0.504964	0.809137	0.338421	NC	0.363683	0.202161	0.8344	0.672877	NC	-0.317868	-0.47939	-0.245724	-0.407247	NC
1041	CDSN	-1.5325	-0.947533	-1.90689	-1.32193	D	-0.0179219	-0.816288	-0.392317	-1.19068	NC	-1.62149	-0.929611	-0.823122	-0.131245	NC	-0.106915	0.584963	-0.691878	0	NC
10451	VAV3	-1.77152	-1.65941	-2.06064	-1.94853	D	-0.395255	-0.771523	-0.684373	-1.06064	NC	-0.217722	-0.13526	0.158546	0.241008	NC	1.15855	1.24101	1.04644	1.1289	NC
10460	TACC3	2.01775	1.87317	3.0466	2.90202	U	-0.0143553	0.161967	1.0145	1.19082	NC	1.16027	1.20789	0.983952	1.03157	NC	-0.871826	-0.824208	-0.72725	-0.679632	NC
10870	HCST	-2.62936	-2.04439	-2.05166	-1.4667	D	-0.910538	-0.667425	-0.332844	-0.0897302	NC	-0.963931	-0.689071	-1.20704	-0.932185	NC	0.754888	1.02975	0.169925	0.444785	NC
10875	FGL2	-1.0902	-1.45943	-1.34958	-1.71882	D	-0.652077	-0.211504	-0.911463	-0.470891	NC	0.63005	0.131245	0.189478	-0.309328	NC	1.06817	0.569366	1.43741	0.938599	NC
11015	KDELR3	1.43145	1.67839	1.2958	1.54273	U	0.883676	0.889172	0.748021	0.753517	NC	0.619422	0.590458	0.613926	0.584963	NC	0.0716444	0.0426809	-0.175292	-0.204255	NC
112611	RWDD2A	1.73361	2.10512	0.874469	1.24598	U	1.85914	1.11289	1	0.253757	NC	-1.24101	-0.598902	-0.494765	0.147342	NC	-1.11548	-0.473371	-1.48699	-0.844881	NC
1138	CHRNA5	-1.20107	-1.4011	-1.31159	-1.51161	D	-0.423466	-0.438573	-0.533979	-0.549085	NC	-0.440304	-0.850253	-0.425197	-0.835146	NC	0.337303	-0.0726453	0.537328	0.127379	NC
114783	LMTK3	-1.90996	-2.01941	-1.5083	-1.61775	D	-0.290286	-1.21714	0.111374	-0.815483	NC	-1.06803	-1.57428	-0.141176	-0.647427	NC	0.551642	0.0453919	0.661094	0.154843	NC
114881	OSBPL7	-2.12928	-1.42884	-1.64386	-0.943416	D	-0.621488	-0.0848889	-0.136062	0.400538	NC	-0.33787	0.220126	-0.874469	-0.316474	NC	1.16993	1.72792	0.469485	1.02748	NC
1287	COL4A5	-1.65357	-1.38944	-1.81767	-1.55354	D	0.35218	0.0624907	0.188083	-0.101606	NC	-1.08357	-0.919453	-0.793883	-0.629764	NC	0.92218	1.0863	0.658049	0.822168	NC
1382	CRABP2	-1.86552	-1.52988	-1.67009	-1.33445	D	0.211218	-0.148951	0.406648	0.0464801	NC	-0.663006	-1.18848	-0.302838	-0.828311	NC	1.41373	0.888259	1.07809	0.552616	NC
144406	WDR66	-1.96991	-1.34577	-1.82053	-1.1964	D	-0.466629	-0.0834562	-0.317252	0.0659214	NC	-0.812031	-1.12172	-1.1952	-1.50489	NC	0.691247	0.381563	0.0671142	-0.24257	NC
149233	IL23R	-1.90554	-2.41143	-1.5013	-2.0072	D	-1.11277	-1.56343	-0.708537	-1.1592	NC	-0.942515	-0.713696	-0.491853	-0.263034	NC	-0.149747	0.0790716	0.356144	0.584963	NC
150468	CKAP2L	1.84298	1.99095	1.93609	2.08406	U	-0.0931094	-0.391191	0	-0.298081	NC	1.17206	0.759866	1.47014	1.05795	NC	-0.764027	-1.17622	-0.912004	-1.3242	NC
153572	IRX2	-1.15781	-1.24354	-1.29563	-1.38136	D	-0.860704	-0.772173	-0.998527	-0.909996	NC	-0.232244	-0.0797216	-0.320774	-0.168252	NC	0.0648644	0.217386	0.150594	0.303116	NC
1903	S1PR3	-1.34239	-0.90182	-1.65753	-1.21696	D	0.129477	0.0854693	-0.185662	-0.22967	NC	-0.0440072	-0.429558	0	-0.385551	NC	1.42786	1.04231	0.987289	0.601738	NC
192683	SCAMP5	3.70044	2.36257	2.25987	0.921997	U	2.47805	1.19265	1.03747	-0.247928	NC	-0.285402	0.691878	1	1.97728	NC	-1.50779	-0.530515	-0.169925	0.807355	NC
2212	FCGR2A	0.468675	1.22239	1.60618	2.3599	U	-0.237039	0.674424	0.900464	1.81193	NC	1.3356	1.13906	0.42414	0.227601	NC	0.629888	0.433349	-0.123829	-0.320368	NC
23022	PALLD	-1.87487	-1.53617	-2.20131	-1.86261	D	0.278018	-0.403252	-0.0484215	-0.729691	NC	-1.34913	-1.06743	-0.667864	-0.386162	NC	0.803757	1.08546	0.465058	0.746761	NC
23057	NMNAT2	-2.07952	-1.63591	-2.36737	-1.92376	D	-0.594094	-0.500984	-0.881944	-0.788835	NC	-0.795382	-0.564498	-0.888492	-0.657608	NC	0.690045	0.920928	0.246438	0.477322	NC
23284	ADGRL3	-2.02748	-1.3356	-2.48938	-1.79751	D	-0.0840643	-0.479993	-0.545968	-0.941897	NC	-0.943416	-0.434403	-0.547488	-0.0384741	NC	1	1.50901	0.308122	0.817136	NC
23380	SRGAP2	-1.50404	-1.67807	-1.75002	-1.92405	D	0.354843	-0.393619	0.108863	-0.639598	NC	-1.26087	-1.0666	-0.512405	-0.318137	NC	0.598019	0.792287	0.772048	0.966317	NC
23406	COTL1	-1.51372	-1.51776	-1.45611	-1.46015	D	-0.374049	-0.381483	-0.316439	-0.323873	NC	-0.822284	-1.12001	-0.81485	-1.11257	NC	0.317385	0.0196626	0.321427	0.0237045	NC
23581	CASP14	1.3377	1.28011	1.27563	1.21805	U	-0.0320612	-0.358048	-0.0941222	-0.420108	NC	0.535494	0.153623	0.86148	0.47961	NC	-0.834263	-1.21613	-0.776675	-1.15855	NC
23764	MAFF	-1.8313	-1.94124	-1.29539	-1.40533	D	0.263674	0.0624397	0.799583	0.598349	NC	-1.08392	-1.24888	-0.882686	-1.04764	NC	1.01106	0.846099	1.12099	0.956038	NC
2550	GABBR1	-1.50343	-1.25189	-1.33978	-1.08825	D	0.0166787	0.0673683	0.180327	0.231016	NC	-0.983512	-1.19924	-1.0342	-1.24993	NC	0.536599	0.320871	0.285061	0.069332	NC
257000	TINCR	-2.09418	-2.67914	-1.47393	-2.05889	D	-1.80468	-0.994647	-1.18442	-0.374396	NC	0.287802	0.433653	-0.522227	-0.376376	NC	0.577309	0.72316	1.16227	1.30812	NC
25999	CLIP3	1.53434	1.64981	1.22239	1.33787	U	1.35147	0.665581	1.03953	0.353637	NC	0.767827	0.216811	1.45372	0.902703	NC	0.584963	0.0339473	0.469485	-0.0815299	NC
26271	FBXO5	1.3841	1.47022	1.51566	1.60178	U	0.138706	0.209096	0.270266	0.340655	NC	1.1964	1.05889	1.12601	0.988504	NC	-0.048997	-0.186501	-0.135117	-0.27262	NC
27345	KCNMB4	1.16406	1.27701	1.94017	2.05311	U	-0.0319429	0.328233	0.744161	1.10434	NC	0.967334	0.65501	0.607158	0.294834	NC	-0.228672	-0.540996	-0.341616	-0.65394	NC
2743	GLRB	1.48543	2.1375	2.15528	2.80735	U	0.678072	0.118644	1.34792	0.788496	NC	1.02554	0.440573	1.58496	1	NC	0.21818	-0.366782	-0.433897	-1.01886	NC
2817	GPC1	-1.57947	-1.70765	-1.5128	-1.64098	D	-0.905833	-1.2397	-0.839162	-1.17303	NC	-0.925841	-1.49657	-0.591973	-1.1627	NC	-0.252201	-0.822928	-0.124024	-0.694751	NC
29797	POM121L8P	1.55493	1.28914	1.24276	0.976969	U	0.055648	0.0320612	-0.256521	-0.280108	NC	0.964474	0.603045	0.98806	0.626632	NC	-0.534812	-0.896241	-0.269017	-0.630445	NC
3241	HPCAL1	-1.43855	-1.43998	-1.38844	-1.38988	D	-0.580986	-0.845212	-0.530881	-0.795107	NC	-0.963921	-1.11184	-0.699695	-0.847615	NC	-0.106362	-0.254283	-0.104922	-0.252843	NC
339122	RAB43	-1.87281	-1.70627	-1.95046	-1.78392	D	-0.566794	-1.03023	-0.644447	-1.10788	NC	-0.16547	-0.384185	0.297968	0.0792526	NC	1.14054	0.921828	0.974005	0.755289	NC
3434	IFIT1	2.04264	2.34861	2.08164	2.3876	U	0.980635	0.146221	1.01963	0.185215	NC	0.648528	0.148099	1.48294	0.982513	NC	-0.413482	-0.913911	-0.719448	-1.21988	NC
3491	CYR61	-2.33171	-2.26211	-3.02933	-2.95974	D	0.00440798	-0.288608	-0.693213	-0.986229	NC	-1.19887	-1.08946	-0.905852	-0.796443	NC	1.13725	1.24666	1.06766	1.17706	NC
3556	IL1RAP	1.73063	1.89019	1.27275	1.43232	U	0.646436	-0.0265942	0.188563	-0.484468	NC	0.118711	0.190539	0.791741	0.86357	NC	-0.96548	-0.893652	-1.12505	-1.05322	NC
3669	ISG20	1.36773	1.30508	1.8365	1.77385	U	0.396301	0.903785	0.86507	1.37255	NC	1.19176	1.35271	0.684277	0.84523	NC	0.22033	0.381283	0.282986	0.443939	NC
4171	MCM2	1.4301	1.12897	1.68216	1.38103	U	-0.448461	-0.486529	-0.196397	-0.234465	NC	1.00375	1.18653	1.04182	1.2246	NC	-0.87481	-0.692035	-0.573677	-0.390902	NC
4174	MCM5	1.92997	1.55558	2.13598	1.76158	U	-0.260709	0.569366	-0.0547059	0.775369	NC	1.33442	1.152	0.504344	0.321928	NC	-0.856265	-1.03868	-0.481869	-0.664285	NC
4241	MFI2	-1.23728	-1.15886	-1.28602	-1.2076	D	0.234551	0.222881	0.185812	0.174142	NC	-0.783222	-1.07607	-0.771552	-1.0644	NC	0.688612	0.395767	0.610185	0.317341	NC
4605	MYBL2	1.97177	1.37248	2.26189	1.66261	U	1.04947	0.779936	1.3396	1.07006	NC	0.792614	0.697527	1.06215	0.96706	NC	-0.129684	-0.22477	0.469605	0.374519	NC
4851	NOTCH1	-0.883919	-1.2855	-1.30854	-1.71012	D	-0.0584686	-0.756458	-0.48309	-1.18108	NC	-0.0106654	-0.0541334	0.687324	0.643856	NC	0.814785	0.771317	1.21637	1.1729	NC
4998	ORC1	1.27065	0.901282	1.71395	1.34458	U	0.699852	0.632514	1.14315	1.07582	NC	-0.143154	-0.164063	-0.0758158	-0.0967248	NC	-0.713949	-0.734858	-0.344583	-0.365492	NC
51195	RAPGEFL1	-1.64654	-2.29144	-1.32528	-1.97018	D	-0.841581	-0.7874	-0.520323	-0.466142	NC	-0.548227	-0.900304	-0.602408	-0.954485	NC	0.25673	-0.0953479	0.901635	0.549557	NC
51706	CYB5R1	-1.74784	-1.8963	-1.90252	-2.05098	D	-0.817517	-0.949874	-0.972193	-1.10455	NC	-1.19504	-0.970343	-1.06268	-0.837986	NC	-0.264715	-0.0400183	-0.116253	0.108444	NC
5275	SERPINB13	-1.24998	-1.24998	-2.08517	-2.08517	D	0.0163018	-0.0331669	-0.818887	-0.868356	NC	-0.521537	-1.22781	-0.472068	-1.17834	NC	0.744743	0.0384741	0.744743	0.0384741	NC
54626	HES2	-2.60083	-2.3107	-2.57467	-2.28454	D	-0.798366	-0.750175	-0.772207	-0.724016	NC	-0.656283	-0.656283	-0.704474	-0.704474	NC	1.14618	1.14618	0.856051	0.856051	NC
54869	EPS8L1	-1.23328	-2.078	-1.05364	-1.89836	D	-1.12286	-1.22601	-0.943214	-1.04637	NC	-0.0272536	-0.0341482	0.0759024	0.0690078	NC	0.0831704	0.0762758	0.927892	0.920998	NC
54908	SPDL1	1.21508	1.1094	1.63167	1.52598	U	-0.203955	-0.46699	0.212629	-0.050405	NC	0.552541	0.911869	0.815575	1.1749	NC	-0.866498	-0.50717	-0.760812	-0.401484	NC
55148	UBR7	1.30832	1.44468	1.30832	1.44468	U	0.32505	0.265636	0.32505	0.265636	NC	0.258176	0.434652	0.317589	0.494066	NC	-0.725097	-0.548621	-0.861453	-0.684977	NC
55355	HJURP	1.32193	1.40415	1.4347	1.51692	U	0.134542	0.452512	0.24731	0.56528	NC	0.9187	0.944602	0.60073	0.626632	NC	-0.268686	-0.242784	-0.350907	-0.325005	NC
55540	IL17RB	2.01197	1.70782	2.01197	1.70782	U	0.0473057	1.09311	0.0473057	1.09311	NC	1.63077	0.773724	0.584963	-0.27208	NC	-0.333901	-1.19094	-0.0297473	-0.886789	NC
55848	PLGRKT	1.04806	1.621	1.30875	1.88169	U	0.755611	1.12178	1.0163	1.38247	NC	1.03658	1.28106	0.670416	0.914893	NC	0.744133	0.98861	0.171196	0.415673	NC
56833	SLAMF8	2.16993	1.80735	1.36257	1	U	1	2	0.192645	1.19265	NC	1.80735	-0.192645	0.807355	-1.19265	NC	0.63743	-1.36257	1	-1	NC
5742	PTGS1	-1.45943	-1.04439	-2.35364	-1.9386	D	0.656046	0.447459	-0.23816	-0.446746	NC	-0.945552	-1.05658	-0.736966	-0.847997	NC	1.16993	1.05889	0.754888	0.643856	NC
574407	C1orf145	-1.88109	-1.75861	-2.0756	-1.95311	D	-0.733664	-0.0711332	-0.928167	-0.265636	NC	-0.212806	-0.605721	-0.875337	-1.26825	NC	0.934624	0.541709	0.81214	0.419225	NC
57568	SIPA1L2	3.35681	3.18138	2.86617	2.69074	U	1.44888	1.13916	0.958244	0.648528	NC	0.723074	0.880336	1.03279	1.19005	NC	-1.18486	-1.0276	-1.00943	-0.852163	NC
5783	PTPN13	-1.22487	-1.434	-1.84316	-2.05229	D	-0.242361	-1.10806	-0.860648	-1.72635	NC	-0.592017	-0.651574	0.273682	0.214125	NC	0.390495	0.330938	0.599623	0.540066	NC
6513	SLC2A1	1.34455	1.41996	1.39892	1.47433	U	0.745709	0.176569	0.800073	0.230932	NC	0.454271	0.551451	1.02341	1.12059	NC	-0.144572	-0.0473921	-0.219982	-0.122802	NC
6515	SLC2A3	1.20328	1.62244	0.881356	1.30051	U	0.424498	-0.389947	0.10257	-0.711875	NC	1.00705	0.0418202	1.8215	0.856265	NC	0.228269	-0.736966	-0.190885	-1.15612	NC
6520	SLC3A2	-1.43099	-1.3402	-1.33668	-1.24589	D	0.466518	0.368409	0.560831	0.462722	NC	-1.28451	-1.15182	-1.1864	-1.05371	NC	0.612996	0.745685	0.52221	0.654899	NC
6935	ZEB1	1.60334	1.46279	1.54002	1.39946	U	0.6746	0.462791	0.611274	0.399465	NC	1.17955	0.827901	1.39136	1.03971	NC	0.250808	-0.100841	0.391359	0.0397097	NC
6941	TCF19	2.87596	2.02438	2.16547	1.31389	U	1.14048	-0.0331669	0.429988	-0.74366	NC	0.559958	-0.156969	1.73361	1.01668	NC	-1.17552	-1.89245	-0.323944	-1.04087	NC
7414	VCL	-1.28605	-1.21103	-1.63907	-1.56406	D	-0.575201	-0.86142	-0.928222	-1.21444	NC	-0.479471	-0.450908	-0.193252	-0.164689	NC	0.231378	0.259942	0.156362	0.184925	NC
7443	VRK1	1.25081	1.8485	1.57731	2.175	U	-0.211024	0.0669067	0.115477	0.393407	NC	1.1528	1.00791	0.874865	0.729975	NC	-0.309036	-0.453927	-0.906732	-1.05162	NC
79682	CENPU	1.75347	1.33464	1.80546	1.38663	U	0.369646	0.24591	0.42164	0.297905	NC	1.1589	0.804529	1.28264	0.928264	NC	-0.224919	-0.579294	0.19391	-0.160465	NC
79846	CFAP69	1.08746	1.85798	1.38702	2.15754	U	0.523562	0.0874628	0.823122	0.387023	NC	-0.436099	0.93587	0	1.37197	NC	-1	0.371969	-1.77052	-0.398549	NC
79966	SCD5	-1.50853	-1.55773	-1.42315	-1.47235	D	-0.887011	-0.219457	-0.801632	-0.134078	NC	0.247294	0.0333786	-0.42026	-0.634175	NC	0.868812	0.654897	0.91801	0.704095	NC
80028	FBXL18	-2.11548	-1.95217	-1.83185	-1.66854	D	-0.97038	-0.896563	-0.68675	-0.612932	NC	-0.312492	-0.521045	-0.386309	-0.594862	NC	0.832606	0.624053	0.6693	0.460747	NC
80174	DBF4B	1.85853	1.54749	1.79647	1.48543	U	0.273565	0.536599	0.211504	0.474539	NC	1.01954	0.993427	0.756506	0.730393	NC	-0.565422	-0.591535	-0.254383	-0.280495	NC
81930	KIF18A	1.43522	2.04008	2.0614	2.66626	U	-0.564785	0.225292	0.0614005	0.851477	NC	0.938599	1.65344	0.148523	0.863365	NC	-1.0614	-0.346558	-1.66626	-0.95142	NC
8208	CHAF1B	1.67705	1.43628	1.67705	1.43628	U	0.614543	0.300579	0.614543	0.300579	NC	0.429604	0.279795	0.743568	0.593759	NC	-0.632906	-0.782714	-0.392129	-0.541938	NC
8613	PPAP2B	2.05264	2.27436	1.4292	1.65093	U	0.199938	0.0943274	-0.423499	-0.529109	NC	1.19794	0.75048	1.30355	0.856091	NC	-0.654765	-1.10222	-0.876485	-1.32394	NC
90007	MIDN	1.90829	1.66875	1.68306	1.44352	U	0.845429	0.187064	0.620202	-0.0381638	NC	-0.289208	-0.114059	0.369158	0.544307	NC	-1.35206	-1.17692	-1.11252	-0.937376	NC
91283	MSANTD3	1.0938	1.40454	1.21793	1.52867	U	-0.851525	-0.544779	-0.727395	-0.42065	NC	1.14183	1.04692	0.835087	0.740175	NC	-0.80349	-0.898402	-1.11423	-1.20914	NC
92126	DSEL	-1.31438	-1.44563	-1.17688	-1.30812	D	-0.333323	-0.50166	-0.195819	-0.364156	NC	-0.666677	-0.646639	-0.49834	-0.478302	NC	0.314381	0.334419	0.445626	0.465664	NC
9214	FAIM3	1.5621	1.49222	1.77906	1.70917	U	-0.242494	0.48737	-0.0255351	0.704328	NC	1.56551	1.10104	0.835647	0.371174	NC	-0.239082	-0.703554	-0.169199	-0.633672	NC
9636	ISG15	0.955993	1.52491	1.79227	2.36119	U	0.342828	0.663291	1.17911	1.49957	NC	1.46806	0.647854	1.1476	0.327391	NC	0.854896	0.0346894	0.285981	-0.534225	NC
9700	ESPL1	2.4458	2.16439	1.65992	1.37851	U	1	0.869939	0.214125	0.0840643	NC	0.481869	0	0.61193	0.130061	NC	-0.963931	-1.4458	-0.682518	-1.16439	NC
990	CDC6	1.58929	1.46533	1.71837	1.59441	U	0.532014	0.697437	0.661094	0.826517	NC	1.25853	0.933314	1.09311	0.76789	NC	0.201258	-0.123961	0.325219	0	NC
9901	SRGAP3	-1.08461	-1.22697	-1.42469	-1.56704	D	0.109847	-0.408963	-0.230228	-0.749038	NC	-0.734148	-0.946022	-0.215338	-0.427212	NC	0.460312	0.248437	0.602665	0.39079	NC
NM_001308279	-	-1.45372	-1.36257	-1.32193	-1.23078	D	0.298844	0.432111	0.430634	0.563901	NC	-0.661415	-0.883807	-0.794681	-1.01707	NC	1.09115	0.868755	1	0.777608	NC
NM_001316342	-	0.648471	1.33834	1.2252	1.91507	U	-0.0710498	1.07086	0.505683	1.64759	NC	0.57801	-0.0209596	-0.563901	-1.16287	NC	-0.141511	-0.74048	-0.831381	-1.43035	NC
NM_001316346	-	0.473931	1.41504	1.64386	2.58496	U	1.152	-0.169925	2.32193	1	NC	-0.929611	-0.463947	0.392317	0.857981	NC	-0.251539	0.214125	-1.19265	-0.726982	NC
NM_001316963	-	1.23799	1.12029	2.23799	2.12029	U	0.656347	0.162939	1.65635	1.16294	NC	-0.179909	0.499571	0.313499	0.99298	NC	-0.761551	-0.0820711	-0.643856	0.0356239	NC
100033416	SNORD116-4	NA	NA	NA	NA	NA	NA	NA	NA	NA	NA	8.72451	9.18239	8.72451	9.18239	U	8.72451	9.18239	8.72451	9.18239	U
100101266	HAVCR1P1	NA	NA	NA	NA	NA	NA	NA	NA	NA	NA	3.45943	3.32193	3.45943	3.32193	U	3.45943	3.32193	3.45943	3.32193	U
100124412	FAM138E	NA	NA	NA	NA	NA	NA	NA	NA	NA	NA	6.35755	8.69349	6.35755	8.69349	U	6.35755	8.69349	6.35755	8.69349	U
100129543	ZNF730	NA	NA	NA	NA	NA	1	NA	1	NA	NC	1.58496	1.32193	2.58496	2.32193	U	2.58496	2.32193	2.58496	2.32193	U
100130331	LOC100130331	NA	NA	NA	NA	NA	NA	NA	NA	NA	NA	2	2	2	2	U	2	2	2	2	U
100130452	LOC100130452	NA	NA	NA	NA	NA	NA	NA	NA	NA	NA	4.80735	4.64386	4.80735	4.64386	U	4.80735	4.64386	4.80735	4.64386	U
100130992	LOC100130992	NA	NA	NA	NA	NA	NA	NA	NA	NA	NA	2	2.80735	2	2.80735	U	2	2.80735	2	2.80735	U
100131060	LINC01135	NA	NA	NA	NA	NA	NA	NA	NA	NA	NA	5.04439	3.45943	5.04439	3.45943	U	5.04439	3.45943	5.04439	3.45943	U
100287814	LINC00582	NA	NA	NA	NA	NA	NA	NA	NA	NA	NA	5.49185	4.39232	5.49185	4.39232	U	5.49185	4.39232	5.49185	4.39232	U
100289017	MOXD2P	NA	NA	NA	NA	NA	NA	NA	NA	NA	NA	3.16993	3	3.16993	3	U	3.16993	3	3.16993	3	U
100302277	MIR548I2	NA	NA	NA	NA	NA	NA	NA	NA	NA	NA	6.26679	6.72792	6.26679	6.72792	U	6.26679	6.72792	6.26679	6.72792	U
100506526	LOC100506526	NA	NA	NA	NA	NA	NA	NA	NA	NA	NA	3.45943	3.32193	3.45943	3.32193	U	3.45943	3.32193	3.45943	3.32193	U
100506860	LOC100506860	-1	-0.0565835	-1.58496	-0.641546	NC	1.6746	0.691878	1.08964	0.106915	NC	1.61365	0.647328	2.59637	1.63005	U	4.28824	3.32193	3.34483	2.37851	U
100507404	TMLHE-AS1	-0.652077	0.347923	-0.652077	0.347923	NC	-0.459432	-0.459432	-0.459432	-0.459432	NC	2.12928	1.85798	2.12928	1.85798	U	2.32193	2.05063	1.32193	1.05063	U
100616258	MIR4516	-0.459432	-1.04235	-0.0463799	-0.629295	NC	0.0783162	-0.902055	0.491368	-0.489003	NC	1.49568	1.08164	2.47605	2.06201	U	2.03342	1.61939	2.61634	2.2023	U
10082	GPC6	1.06413	0.812031	0.716207	0.464108	NC	0.825971	0.802663	0.478047	0.45474	NC	1.26727	1.60486	1.29057	1.62817	U	1.02911	1.3667	1.28121	1.6188	U
100874128	LINC00333	NA	NA	NA	NA	NA	NA	NA	NA	NA	NA	4.08746	4.32193	4.08746	4.32193	U	4.08746	4.32193	4.08746	4.32193	U
100874342	RNF216-IT1	NA	NA	NA	NA	NA	NA	NA	NA	NA	NA	8.02791	6.32193	8.02791	6.32193	U	8.02791	6.32193	8.02791	6.32193	U
101060385	LOC101060385	NA	NA	NA	NA	NA	NA	NA	NA	NA	NA	5.32193	4.39232	5.32193	4.39232	U	5.32193	4.39232	5.32193	4.39232	U
10174	SORBS3	-0.688903	-0.878859	-0.539622	-0.729578	NC	-0.490403	-0.933816	-0.341122	-0.784535	NC	-1.42854	-1.73956	-0.985126	-1.29614	D	-1.23004	-1.54106	-1.04008	-1.3511	D
101927156	LOC101927156	NA	NA	NA	NA	NA	NA	NA	NA	NA	NA	3.90689	5.39232	3.90689	5.39232	U	3.90689	5.39232	3.90689	5.39232	U
101927830	LOC101927830	-0.652077	0.347923	-0.652077	0.347923	NC	-0.459432	-0.459432	-0.459432	-0.459432	NC	2.12928	1.85798	2.12928	1.85798	U	2.32193	2.05063	1.32193	1.05063	U
101928201	LOC101928201	NA	NA	NA	NA	NA	NA	NA	NA	NA	NA	3.45943	3.32193	3.45943	3.32193	U	3.45943	3.32193	3.45943	3.32193	U
101928744	LINC01450	NA	NA	NA	NA	NA	NA	NA	NA	NA	NA	3	2	3	2	U	3	2	3	2	U
101929651	LINC01398	NA	NA	NA	NA	NA	NA	NA	NA	NA	NA	4.58496	4.45943	4.58496	4.45943	U	4.58496	4.45943	4.58496	4.45943	U
102465136	MIR378J	NA	NA	NA	NA	NA	NA	NA	NA	NA	NA	7.48382	7.36632	7.48382	7.36632	U	7.48382	7.36632	7.48382	7.36632	U
102465247	MIR548AY	NA	NA	NA	NA	NA	NA	NA	NA	NA	NA	8.52748	7.40088	8.52748	7.40088	U	8.52748	7.40088	8.52748	7.40088	U
102465499	MIR6831	NA	NA	NA	NA	NA	NA	NA	NA	NA	NA	9.18488	9.0607	9.18488	9.0607	U	9.18488	9.0607	9.18488	9.0607	U
102724077	LINC01389	-0.652077	-0.0671142	-0.0506261	0.534336	NC	-1.55254	0.0951572	-0.95109	0.696608	NC	0.0931094	-3.90689	-1.55459	-5.55459	D	-0.807355	-4.80735	-1.39232	-5.39232	D
102724515	LINC01291	NA	NA	NA	NA	NA	NA	NA	NA	NA	NA	5.83289	4.70044	5.83289	4.70044	U	5.83289	4.70044	5.83289	4.70044	U
103689918	LINC01378	NA	NA	NA	NA	NA	NA	NA	NA	NA	NA	6.06609	4.9542	6.06609	4.9542	U	6.06609	4.9542	6.06609	4.9542	U
104310353	LINC01399	NA	NA	NA	NA	NA	NA	NA	NA	NA	NA	4.45943	4.32193	4.45943	4.32193	U	4.45943	4.32193	4.45943	4.32193	U
10776	ARPP19	0.814054	0.347019	-1.01483	-1.48187	NC	0.717307	-0.278301	-1.11158	-2.10719	NC	-3.07215	-2.49957	-2.07654	-1.50396	D	-3.1689	-2.59632	-2.70186	-2.12928	D
10800	CYSLTR1	NA	NA	NA	NA	NA	NA	NA	NA	NA	NA	3.32193	3.16993	3.32193	3.16993	U	3.32193	3.16993	3.32193	3.16993	U
11197	WIF1	NA	NA	NA	NA	NA	NA	NA	NA	NA	NA	4.16993	2.32193	4.16993	2.32193	U	4.16993	2.32193	4.16993	2.32193	U
11318	GPR182	NA	NA	NA	NA	NA	NA	NA	NA	NA	NA	3	3.90689	3	3.90689	U	3	3.90689	3	3.90689	U
116238	TLCD1	0.321528	0.664333	0.340325	0.683131	NC	-0.571023	-0.912655	-0.552226	-0.893857	NC	-1.64361	-1.53051	-1.30198	-1.18888	D	-2.53616	-2.42307	-2.87897	-2.76587	D
118670	FAM24A	NA	NA	NA	NA	NA	NA	NA	NA	NA	NA	5.55459	4.39232	5.55459	4.39232	U	5.55459	4.39232	5.55459	4.39232	U
119395	CALHM3	NA	NA	NA	NA	NA	NA	NA	NA	NA	NA	3	5.67243	3	5.67243	U	3	5.67243	3	5.67243	U
121006	FAM186A	NA	NA	NA	NA	NA	NA	NA	NA	NA	NA	3.45943	2.32193	3.45943	2.32193	U	3.45943	2.32193	3.45943	2.32193	U
125336	LOXHD1	NA	NA	NA	NA	NA	NA	NA	NA	NA	NA	5.24793	4.32193	5.24793	4.32193	U	5.24793	4.32193	5.24793	4.32193	U
129080	EMID1	NA	NA	NA	NA	NA	NA	NA	NA	NA	NA	2.58496	3.45943	2.58496	3.45943	U	2.58496	3.45943	2.58496	3.45943	U
131149	OTOL1	NA	NA	NA	NA	NA	NA	NA	NA	NA	NA	5.55459	4.08746	5.55459	4.08746	U	5.55459	4.08746	5.55459	4.08746	U
135935	NOBOX	NA	NA	NA	NA	NA	NA	NA	NA	NA	NA	6.14975	3.58496	6.14975	3.58496	U	6.14975	3.58496	6.14975	3.58496	U
140893	RBBP8NL	NA	NA	NA	NA	NA	NA	NA	NA	NA	NA	2.32193	3.16993	2.32193	3.16993	U	2.32193	3.16993	2.32193	3.16993	U
146183	OTOA	NA	NA	NA	NA	NA	NA	NA	NA	NA	NA	5.08746	3.58496	5.08746	3.58496	U	5.08746	3.58496	5.08746	3.58496	U
1482	NKX2-5	-0.66592	-0.827671	-0.576611	-0.738362	NC	-0.300924	-0.11679	-0.211614	-0.0274807	NC	-1.75731	-1.94062	-1.94145	-2.12476	D	-1.39232	-1.57562	-1.23057	-1.41387	D
149047	MGC27382	NA	NA	NA	NA	NA	NA	NA	NA	NA	NA	3.45943	4.9542	3.45943	4.9542	U	3.45943	4.9542	3.45943	4.9542	U
150160	CCT8L2	NA	NA	NA	NA	NA	NA	NA	NA	NA	NA	4.70044	3.58496	4.70044	3.58496	U	4.70044	3.58496	4.70044	3.58496	U
1587	ADAM3A	NA	NA	NA	NA	NA	NA	NA	NA	NA	NA	2.32193	2.32193	2.32193	2.32193	U	2.32193	2.32193	2.32193	2.32193	U
159162	RBMY2FP	-0.0780025	-0.160465	-0.784271	-0.866733	NC	0	-0.547488	-0.706269	-1.25376	NC	1.72935	1.14439	2.27684	1.69188	U	1.80735	1.22239	1.88982	1.30485	U
160298	C11orf42	NA	NA	NA	NA	NA	NA	NA	NA	NA	NA	3.58496	5	3.58496	5	U	3.58496	5	3.58496	5	U
1604	CD55	1.05036	1.18591	0.967585	1.10313	NC	1.21082	0.675884	1.12804	0.593108	NC	1.4374	1.25943	1.97234	1.79436	U	1.59786	1.41989	1.46231	1.28434	U
1735	DIO3	NA	NA	NA	NA	NA	NA	NA	NA	NA	NA	2.58496	3.58496	2.58496	3.58496	U	2.58496	3.58496	2.58496	3.58496	U
1840	DTX1	NA	NA	NA	NA	NA	NA	NA	NA	NA	NA	3	2	3	2	U	3	2	3	2	U
196549	EEF1DP3	0.701342	-0.0970245	0.16004	-0.638326	NC	0.500429	0.16601	-0.0408723	-0.375291	NC	1.77623	0.919	2.11064	1.25342	U	1.57531	0.718088	2.37368	1.51645	U
2056	EPO	NA	NA	NA	NA	NA	NA	NA	NA	NA	NA	4.90689	3.16993	4.90689	3.16993	U	4.90689	3.16993	4.90689	3.16993	U
221711	SYCP2L	NA	NA	NA	NA	NA	NA	NA	NA	NA	NA	2	3	2	3	U	2	3	2	3	U
22941	SHANK2	NA	NA	NA	NA	NA	NA	0	NA	0	NA	3.16993	3	3.16993	3	U	3.16993	3	3.16993	3	U
2304	FOXE1	NA	NA	NA	NA	NA	NA	NA	NA	NA	NA	3	1.58496	3	1.58496	U	3	1.58496	3	1.58496	U
257144	GCSAM	-0.252766	-0.163499	-0.802963	-0.713696	NC	0.61891	0.920566	0.0687128	0.370368	NC	-2.42626	-2.51937	-2.72792	-2.82103	D	-1.55459	-1.6477	-1.64386	-1.73697	D
2583	B4GALNT1	0.0238467	0.5025	-0.409113	0.0695409	NC	0.0473057	-0.549339	-0.385654	-0.982298	NC	-1.9542	-2.63227	-1.35755	-2.03562	D	-1.93074	-2.60881	-2.40939	-3.08746	D
25914	RTTN	NA	NA	NA	NA	NA	NA	NA	NA	NA	NA	6.2854	6.2854	6.2854	6.2854	U	6.2854	6.2854	6.2854	6.2854	U
259308	FAM205A	NA	NA	NA	NA	NA	NA	NA	NA	NA	NA	3.90689	2.58496	3.90689	2.58496	U	3.90689	2.58496	3.90689	2.58496	U
26022	TMEM98	-0.652901	-0.531156	-0.953904	-0.832158	NC	0.243669	0.577248	-0.0573332	0.276245	NC	-2.68589	-3.08017	-3.01947	-3.41375	D	-1.78932	-2.1836	-1.91107	-2.30535	D
26050	SLITRK5	0.038889	-0.428237	-0.252766	-0.719892	NC	1.22239	-0.0810716	0.930737	-0.372727	NC	-3.49016	-3.38054	-2.1867	-2.07708	D	-2.30666	-2.19704	-1.83954	-1.72991	D
2694	GIF	NA	NA	NA	NA	NA	NA	NA	NA	NA	NA	4.08746	4.58496	4.08746	4.58496	U	4.08746	4.58496	4.08746	4.58496	U
27299	ADAMDEC1	NA	NA	NA	NA	NA	NA	NA	NA	NA	NA	2.58496	2.32193	2.58496	2.32193	U	2.58496	2.32193	2.58496	2.32193	U
280655	IGBP1P1	NA	NA	NA	NA	NA	NA	NA	NA	NA	NA	5.64386	4.52356	5.64386	4.52356	U	5.64386	4.52356	5.64386	4.52356	U
284391	ZNF844	NA	NA	NA	NA	NA	NA	NA	NA	NA	NA	6.40939	5.88264	6.40939	5.88264	U	6.40939	5.88264	6.40939	5.88264	U
284751	LINC01270	NA	NA	NA	NA	NA	NA	NA	NA	NA	NA	3.58496	2.32193	3.58496	2.32193	U	3.58496	2.32193	3.58496	2.32193	U
285346	ZNF852	0.286881	-0.473931	0.316027	-0.444785	NC	-0.217591	-0.358454	-0.188445	-0.329308	NC	1.77341	1.32862	1.91427	1.46949	U	1.26894	0.82415	2.02975	1.58496	U
29122	PRSS50	NA	NA	NA	NA	NA	NA	NA	NA	NA	NA	3.32193	3.16993	3.32193	3.16993	U	3.32193	3.16993	3.32193	3.16993	U
2977	GUCY1A2	-1	-1	0	0	NC	1	0	2	1	NC	1	1.45943	2	2.45943	U	3	3.45943	3	3.45943	U
3112	HLA-DOB	-0.29045	-0.478654	-0.745245	-0.933449	NC	-0.466876	-0.563901	-0.921672	-1.0187	NC	-3.62059	-1.77259	-3.52356	-1.67557	D	-3.79701	-1.94902	-3.60881	-1.76081	D
3170	FOXA2	NA	NA	NA	NA	NA	NA	NA	NA	NA	NA	4.45943	2.32193	4.45943	2.32193	U	4.45943	2.32193	4.45943	2.32193	U
3311	HSPA7	NA	NA	NA	NA	NA	NA	NA	NA	NA	NA	3	4.32193	3	4.32193	U	3	4.32193	3	4.32193	U
338917	VSX2	NA	NA	NA	NA	NA	NA	NA	NA	NA	NA	4.16993	4	4.16993	4	U	4.16993	4	4.16993	4	U
339345	NANOS2	NA	NA	NA	NA	NA	NA	NA	NA	NA	NA	4.08746	3	4.08746	3	U	4.08746	3	4.08746	3	U
3447	IFNA13	NA	NA	NA	NA	NA	NA	NA	NA	NA	NA	5.88264	4.16993	5.88264	4.16993	U	5.88264	4.16993	5.88264	4.16993	U
3452	IFNA21	NA	NA	NA	NA	NA	NA	NA	NA	NA	NA	4.80735	5.93074	4.80735	5.93074	U	4.80735	5.93074	4.80735	5.93074	U
3467	IFNW1	NA	NA	NA	NA	NA	NA	NA	NA	NA	NA	4.39232	3.32193	4.39232	3.32193	U	4.39232	3.32193	4.39232	3.32193	U
374355	CCDC172	NA	NA	NA	NA	NA	NA	NA	NA	NA	NA	4.9542	2.80735	4.9542	2.80735	U	4.9542	2.80735	4.9542	2.80735	U
3752	KCND3	NA	NA	NA	NA	NA	NA	NA	NA	NA	NA	2.32193	2.32193	2.32193	2.32193	U	2.32193	2.32193	2.32193	2.32193	U
3795	KHK	-0.149056	-0.470166	0.471752	0.150641	NC	-1.47426	-1.10714	-0.853451	-0.486334	NC	-1.67807	-0.967579	-2.04519	-1.3347	D	-3.00328	-2.29278	-2.68216	-1.97167	D
3802	KIR2DL1	NA	NA	NA	NA	NA	NA	NA	NA	NA	NA	4.08746	4.08746	4.08746	4.08746	U	4.08746	4.08746	4.08746	4.08746	U
388595	TMEM82	NA	NA	NA	NA	NA	NA	NA	NA	NA	NA	3.45943	3.32193	3.45943	3.32193	U	3.45943	3.32193	3.45943	3.32193	U
3937	LCP2	NA	NA	NA	NA	NA	NA	NA	NA	NA	NA	2.32193	3.90689	2.32193	3.90689	U	2.32193	3.90689	2.32193	3.90689	U
399972	ST3GAL4-AS1	-0.0433564	-0.214505	0.221578	0.0504294	NC	0.298967	0.0963684	0.563901	0.361302	NC	-1.54689	-2.48081	-1.3443	-2.27821	D	-1.20457	-2.13848	-1.03342	-1.96733	D
400759	GBP1P1	NA	NA	NA	NA	NA	NA	NA	NA	NA	NA	3.70044	3.45943	3.70044	3.45943	U	3.70044	3.45943	3.70044	3.45943	U
400946	LINC00954	NA	NA	NA	NA	NA	NA	NA	NA	NA	NA	4.08746	2	4.08746	2	U	4.08746	2	4.08746	2	U
400952	LINC01121	NA	NA	NA	NA	NA	NA	NA	NA	NA	NA	3.58496	3.45943	3.58496	3.45943	U	3.58496	3.45943	3.58496	3.45943	U
401613	LINC00890	NA	NA	NA	NA	NA	NA	NA	NA	NA	NA	2.58496	1.58496	2.58496	1.58496	U	2.58496	1.58496	2.58496	1.58496	U
409	ARRB2	-0.314109	-0.758992	0.0178333	-0.42705	NC	-0.318843	-0.299999	0.0130993	0.0319429	NC	-1.33922	-1.89156	-1.35806	-1.91041	D	-1.34395	-1.8963	-0.899071	-1.45141	D
4254	KITLG	-0.882643	-0.542793	-0.475733	-0.135883	NC	1.12298	0.601173	1.52989	1.00808	NC	1.15425	1.33645	1.67606	1.85826	U	3.15987	3.34207	2.82002	3.00222	U
441459	ANKRD18B	-1.11304	-0.801096	-0.518638	-0.206694	NC	-0.610274	-0.603904	-0.0158714	-0.00950187	NC	-1.98729	-1.60101	-1.99366	-1.60738	D	-1.48452	-1.09824	-1.79647	-1.41019	D
441925	BECN2	NA	NA	NA	NA	NA	NA	NA	NA	NA	NA	4.39232	3.32193	4.39232	3.32193	U	4.39232	3.32193	4.39232	3.32193	U
4593	MUSK	NA	NA	NA	NA	NA	NA	NA	NA	NA	NA	3.45943	2.32193	3.45943	2.32193	U	3.45943	2.32193	3.45943	2.32193	U
5050	PAFAH1B3	-0.495026	-0.406559	-0.254394	-0.165927	NC	-0.236868	-0.157186	0.0037629	0.0834456	NC	-1.46357	-1.40269	-1.54325	-1.48237	D	-1.20541	-1.14453	-1.29388	-1.233	D
51411	BIN2	NA	NA	NA	NA	NA	NA	NA	NA	NA	NA	3.58496	4.80735	3.58496	4.80735	U	3.58496	4.80735	3.58496	4.80735	U
5446	PON3	NA	NA	NA	NA	NA	NA	NA	NA	NA	NA	3.45943	3.32193	3.45943	3.32193	U	3.45943	3.32193	3.45943	3.32193	U
54976	C20orf27	-0.896856	-0.600001	-0.457553	-0.160698	NC	-0.908984	-0.431663	-0.469682	0.00764006	NC	-1.27439	-0.957417	-1.75172	-1.43474	D	-1.28652	-0.969545	-1.58338	-1.2664	D
550113	LOC550113	NA	NA	NA	NA	NA	NA	NA	NA	NA	NA	2.32193	2	2.32193	2	U	2.32193	2	2.32193	2	U
55346	TCP11L1	-0.0829614	-0.472753	-0.607261	-0.997053	NC	0.255945	-0.364997	-0.268355	-0.889297	NC	-2.32549	-2.03598	-1.70454	-1.41504	D	-1.98658	-1.69707	-1.59679	-1.30728	D
55510	DDX43	-0.540568	-0.830075	-0.0641303	-0.353637	NC	-0.752072	-0.415037	-0.275634	0.0614005	NC	1.75207	1.36678	1.41504	1.02975	U	1.54057	1.15528	1.83007	1.44478	U
55701	ARHGEF40	-0.988859	-0.841302	-1.24442	-1.09686	NC	-0.092364	-0.153246	-0.347923	-0.408806	NC	-1.96467	-2.3339	-1.90378	-2.27302	D	-1.06817	-1.43741	-1.21573	-1.58496	D
55732	C1orf112	NA	NA	NA	NA	NA	NA	NA	NA	NA	NA	5.52356	5.75489	5.52356	5.75489	U	5.52356	5.75489	5.52356	5.75489	U
55812	SPATA7	1.02359	0.446402	0.105117	-0.472068	NC	0.337695	0.910058	-0.580775	-0.00841224	NC	-1.11757	-1.38606	-1.68993	-1.95842	D	-1.80346	-2.07195	-1.22628	-1.49476	D
56144	PCDHA4	NA	NA	NA	NA	NA	NA	NA	NA	NA	NA	4.32193	2.32193	4.32193	2.32193	U	4.32193	2.32193	4.32193	2.32193	U
56952	PRTFDC1	NA	NA	NA	NA	NA	NA	NA	NA	NA	NA	6.32193	4.64386	6.32193	4.64386	U	6.32193	4.64386	6.32193	4.64386	U
574042	SNORA10	1.09921	0.544541	1.15827	0.603595	NC	-0.258028	-0.901236	-0.198974	-0.842182	NC	-4.21205	-2.01507	-3.56884	-1.37186	D	-5.56929	-3.37231	-5.01462	-2.81764	D
57463	AMIGO1	NA	NA	NA	NA	NA	NA	NA	NA	NA	NA	2.32193	3.32193	2.32193	3.32193	U	2.32193	3.32193	2.32193	3.32193	U
59271	EVA1C	-0.0220876	0.122206	-0.0220876	0.122206	NC	-0.22605	-0.166691	-0.22605	-0.166691	NC	-1.5527	-1.17576	-1.61206	-1.23512	D	-1.75666	-1.37973	-1.90095	-1.52402	D
594837	SNORD101	-0.0448078	-0.0402639	-0.0448078	-0.0402639	NC	1.0794	0.0980643	1.0794	0.0980643	NC	-9.43254	-9.43254	-8.45121	-8.45121	D	-8.30834	-8.30834	-8.31288	-8.31288	D
6274	S100A3	-0.242913	-0.294167	0.579378	0.528124	NC	-1.23097	-1.18265	-0.408682	-0.360354	NC	-1.28669	-1.48543	-1.33502	-1.53376	D	-2.27475	-2.47349	-2.2235	-2.42223	D
6275	S100A4	-0.689493	-0.914668	-0.554056	-0.779231	NC	-0.0580321	0.0998804	0.0774045	0.235317	NC	-3.25873	-3.42223	-3.41665	-3.58015	D	-2.62727	-2.79077	-2.4021	-2.5656	D
643677	CCDC168	0	-1	0	-1	NC	1	0.584963	1	0.584963	NC	1.58496	2.24793	2	2.66297	U	2.58496	3.24793	3.58496	4.24793	U
643988	C1orf233	-0.588333	-0.467027	-0.272495	-0.151188	NC	-0.830262	-0.670349	-0.514424	-0.35451	NC	-1.60455	-1.5422	-1.76446	-1.70212	D	-1.84648	-1.78413	-1.96779	-1.90544	D
647288	CTAGE11P	1	1.1375	-0.847997	-0.710493	NC	1.1375	2.48543	-0.710493	0.63743	NC	-3.45943	-3.45943	-4.80735	-4.80735	D	-3.32193	-3.32193	-3.45943	-3.45943	D
653073	GOLGA8J	NA	NA	NA	NA	NA	NA	NA	NA	NA	NA	2.58496	3.32193	2.58496	3.32193	U	2.58496	3.32193	2.58496	3.32193	U
6545	SLC7A4	NA	NA	NA	NA	NA	NA	NA	NA	NA	NA	2.58496	5.20945	2.58496	5.20945	U	2.58496	5.20945	2.58496	5.20945	U
6677	SPAM1	NA	NA	NA	NA	NA	NA	NA	NA	NA	NA	2.58496	2.58496	2.58496	2.58496	U	2.58496	2.58496	2.58496	2.58496	U
6869	TACR1	1	NA	1	NA	NC	NA	NA	NA	NA	NA	3	1.58496	3	1.58496	U	2	0.584963	3	1.58496	U
693151	MIR566	NA	NA	NA	NA	NA	NA	NA	NA	NA	NA	7.70736	9.59805	7.70736	9.59805	U	7.70736	9.59805	7.70736	9.59805	U
6975	TECTB	NA	NA	NA	NA	NA	NA	NA	NA	NA	NA	2.32193	2	2.32193	2	U	2.32193	2	2.32193	2	U
7143	TNR	NA	NA	NA	NA	NA	1	NA	1	NA	NC	2.32193	1.32193	3.32193	2.32193	U	3.32193	2.32193	3.32193	2.32193	U
722	C4BPA	NA	NA	NA	NA	NA	NA	NA	NA	NA	NA	2.58496	2.32193	2.58496	2.32193	U	2.58496	2.32193	2.58496	2.32193	U
731157	LOC731157	NA	NA	NA	NA	NA	NA	NA	NA	NA	NA	4.90689	5.78136	4.90689	5.78136	U	4.90689	5.78136	4.90689	5.78136	U
775	CACNA1C	NA	NA	NA	NA	NA	0	NA	0	NA	NA	2.80735	2	2.80735	2	U	2.80735	2	2.80735	2	U
784	CACNB3	-0.65035	-0.777854	-0.406197	-0.533701	NC	-0.644936	-1.06901	-0.400784	-0.824855	NC	-2.16588	-2.04947	-1.74181	-1.6254	D	-2.16046	-2.04406	-2.03296	-1.91655	D
7849	PAX8	-0.847997	-0.295456	-0.415037	0.137504	NC	-0.469485	-0.896907	-0.0365259	-0.463947	NC	-2.47805	-3.70044	-2.05063	-3.27302	D	-2.09954	-3.32193	-2.65208	-3.87447	D
79734	KCTD17	-0.960829	-0.960829	-1.15843	-1.15843	NC	0.27621	1.0066	0.0786098	0.809003	NC	-3.1375	-3.1375	-3.8679	-3.8679	D	-1.90046	-1.90046	-1.90046	-1.90046	D
79776	ZFHX4	NA	1	NA	1	NC	0	NA	0	NA	NA	3.80735	2.32193	3.80735	2.32193	U	3.80735	2.32193	2.80735	1.32193	U
79782	LRRC31	NA	NA	NA	NA	NA	NA	NA	NA	NA	NA	4.45943	3.90689	4.45943	3.90689	U	4.45943	3.90689	4.45943	3.90689	U
79885	HDAC11	-1.06711	-0.787006	-1.26589	-0.985786	NC	0.0641303	-0.230613	-0.13465	-0.429393	NC	-2.71621	-3.35364	-2.42146	-3.05889	D	-1.58496	-2.22239	-1.86507	-2.5025	D
79908	BTNL8	NA	NA	NA	NA	NA	NA	NA	NA	NA	NA	3	3	3	3	U	3	3	3	3	U
80758	PRR7	-0.109598	-0.145491	-0.0651108	-0.101003	NC	-0.311017	-0.303625	-0.26653	-0.259138	NC	-1.65067	-1.36965	-1.65806	-1.37704	D	-1.85208	-1.57106	-1.81619	-1.53517	D
84100	ARL6	0.303069	0.553392	-0.629817	-0.379493	NC	0.481406	-0.433897	-0.451479	-1.36678	NC	-2.57827	-1.37315	-1.66297	-0.457851	D	-2.39993	-1.19482	-2.65025	-1.44514	D
846	CASR	NA	NA	NA	NA	NA	NA	NA	NA	NA	NA	3	2.32193	3	2.32193	U	3	2.32193	3	2.32193	U
85458	DIXDC1	-0.188578	0.0449124	-1.06357	-0.830075	NC	0.0884688	-0.303513	-0.786519	-1.1785	NC	-1.71391	-1.86201	-1.32193	-1.47003	D	-1.43686	-1.58496	-1.67035	-1.81845	D
8869	ST3GAL5	-0.0384741	-1.24793	0.165059	-1.04439	NC	-0.724366	-1.16046	-0.520832	-0.956931	NC	-4.52356	-4.52356	-4.08746	-4.08746	D	-5.20945	-5.20945	-4	-4	D
9172	MYOM2	NA	NA	NA	NA	NA	NA	NA	NA	NA	NA	3	2.32193	3	2.32193	U	3	2.32193	3	2.32193	U
91768	CABLES1	-0.555816	-0.59976	-0.941106	-0.98505	NC	-0.513172	-0.458205	-0.898462	-0.843496	NC	-1.26024	-1.59904	-1.3152	-1.654	D	-1.21759	-1.55639	-1.17365	-1.51245	D
92797	HELB	NA	NA	NA	NA	NA	NA	NA	NA	NA	NA	5.45943	5.75489	5.45943	5.75489	U	5.45943	5.75489	5.45943	5.75489	U
9437	NCR1	NA	NA	NA	NA	NA	NA	NA	NA	NA	NA	5.08746	4.52356	5.08746	4.52356	U	5.08746	4.52356	5.08746	4.52356	U
9508	ADAMTS3	2.58496	1	0.584963	-1	NC	2	1	0	-1	NC	2.16993	2.08746	3.16993	3.08746	U	1.58496	1.5025	3.16993	3.08746	U
9863	MAGI2	NA	1	NA	1	NC	1	NA	1	NA	NC	1.58496	1	2.58496	2	U	2.58496	2	1.58496	1	U
NM_001308076	-	NA	NA	NA	NA	NA	NA	NA	NA	NA	NA	6.61471	6.2854	6.61471	6.2854	U	6.61471	6.2854	6.61471	6.2854	U
NM_001308175	-	NA	NA	NA	NA	NA	NA	NA	NA	NA	NA	3.58496	3.58496	3.58496	3.58496	U	3.58496	3.58496	3.58496	3.58496	U
NM_001308274	-	0.160465	-0.180572	-0.356935	-0.697971	NC	0.667425	0.210218	0.150025	-0.307182	NC	0.859822	1.78943	1.31703	2.24664	U	1.36678	2.29639	1.70782	2.63743	U
NM_001308382	-	-0.854372	-0.408307	0.307625	0.753689	NC	-1.49529	-0.0620292	-0.333294	1.09997	NC	-7.46761	-1.76717	-8.90087	-3.20043	D	-8.10852	-2.40808	-8.55459	-2.85415	D
NM_001308422	-	NA	NA	NA	NA	NA	NA	NA	NA	NA	NA	8.65821	6.56986	8.65821	6.56986	U	8.65821	6.56986	8.65821	6.56986	U
NM_001311345	-	-1.08661	-0.344828	-1.41443	-0.672652	NC	0.482178	-0.631133	0.154354	-0.958956	NC	-2.48901	-3.22293	-1.3757	-2.10962	D	-0.920221	-1.65415	-1.662	-2.39593	D
NM_001313959	-	NA	NA	0	0	NA	NA	NA	0	0	NA	8.23362	7.62936	8.23362	7.62936	U	8.23362	7.62936	8.23362	7.62936	U
NM_001318831	-	-0.743933	-1.45423	0.335083	-0.375212	NC	-0.0117772	0.0724358	1.06724	1.15145	NC	-3.44245	-7.29331	-3.52666	-7.37752	D	-2.71029	-6.56115	-2	-5.85086	D
NM_001318938	-	1.17708	0.613391	0.930291	0.366597	NC	-0.284729	-0.837271	-0.531523	-1.08406	NC	2.77131	2.54282	3.32385	3.09536	U	1.3095	1.08101	1.87319	1.6447	U
NM_001319068	-	-0.0804386	-0.294034	-0.0773057	-0.290901	NC	-0.256166	-1.15514	-0.253033	-1.152	NC	-8.59246	-1.34453	-7.69349	-0.445559	D	-8.76818	-1.52026	-8.55459	-1.30666	D
NM_001319145	-	NA	NA	NA	NA	NA	NA	NA	NA	NA	NA	4.58496	3.32193	4.58496	3.32193	U	4.58496	3.32193	4.58496	3.32193	U
NM_001319653	-	NA	NA	NA	NA	NA	NA	NA	NA	NA	NA	9.9629	8.8009	9.9629	8.8009	U	9.9629	8.8009	9.9629	8.8009	U
NM_001319845	-	NA	NA	NA	NA	NA	NA	NA	NA	NA	NA	9.56224	8.29462	9.56224	8.29462	U	9.56224	8.29462	9.56224	8.29462	U
NM_001320446	-	NA	NA	NA	NA	NA	NA	NA	NA	NA	NA	8.35315	7.12928	8.35315	7.12928	U	8.35315	7.12928	8.35315	7.12928	U
NM_030644	-	NA	NA	NA	NA	NA	NA	NA	NA	NA	NA	6.10852	5.39232	6.10852	5.39232	U	6.10852	5.39232	6.10852	5.39232	U
NR_131222	-	NA	NA	NA	NA	NA	NA	NA	NA	NA	NA	4.24793	4.9542	4.24793	4.9542	U	4.24793	4.9542	4.24793	4.9542	U
NR_131946	-	NA	NA	NA	NA	NA	NA	NA	NA	NA	NA	4.58496	3.45943	4.58496	3.45943	U	4.58496	3.45943	4.58496	3.45943	U
NR_131948	-	NA	NA	NA	NA	NA	NA	NA	NA	NA	NA	2.58496	2.32193	2.58496	2.32193	U	2.58496	2.32193	2.58496	2.32193	U
NR_133652	-	NA	NA	NA	NA	NA	NA	NA	NA	NA	NA	3.32193	5.08746	3.32193	5.08746	U	3.32193	5.08746	3.32193	5.08746	U
NR_133908	-	NA	NA	NA	NA	NA	NA	NA	NA	NA	NA	7.56986	7.74147	7.56986	7.74147	U	7.56986	7.74147	7.56986	7.74147	U
NR_135243	-	NA	NA	NA	NA	NA	NA	NA	NA	NA	NA	3.16993	3	3.16993	3	U	3.16993	3	3.16993	3	U
100008587	RNA5-8S5	0.18435	-0.0383175	0.210901	-0.011766	NC	1.96557	2.44654	1.99212	2.47309	U	0.545848	0.530295	0.064877	0.0493246	NC	2.32707	2.31152	2.54973	2.53418	U
100008588	RNA18S5	0.0876673	0.0623659	0.274954	0.249653	NC	1.71469	2.04179	1.90198	2.22908	U	0.536056	0.576278	0.208956	0.249178	NC	2.16308	2.20331	2.18838	2.22861	U
100128782	LINC00476	-0.756377	-0.946561	0.0706767	-0.119507	NC	1.35556	1.26218	2.18261	2.08924	U	0.0263513	-0.222392	0.119727	-0.129017	NC	2.13829	1.88954	2.32847	2.07973	U
100128788	SRRM2-AS1	-1.28293	-0.531613	-0.39689	0.354431	NC	1.31797	1.20464	2.20401	2.09068	U	0.12883	-0.298341	0.242162	-0.185009	NC	2.72973	2.30256	1.97841	1.55124	U
100128822	LINC01003	0.321928	-0.514573	-0.197446	-1.03395	NC	1.8679	1.82103	1.34852	1.30166	U	0.150025	-0.152735	0.196892	-0.105869	NC	1.69599	1.39323	2.5325	2.22973	U
100129387	GABPB1-AS1	-0.704684	-1.24135	-0.0718503	-0.608517	NC	1.5142	1.08768	2.14703	1.72052	U	-0.280014	-0.447939	0.146498	-0.0214266	NC	1.93887	1.77094	2.47553	2.30761	U
100129534	LOC100129534	0.505736	0.332899	0.561879	0.389042	NC	1.95526	2.06986	2.0114	2.12601	U	0.235317	0.111978	0.120714	-0.00262547	NC	1.68484	1.5615	1.85768	1.73434	U
100129550	LOC100129550	-0.0443941	-0.31104	-0.0356239	-0.30227	NC	1.87685	1.40517	1.88562	1.41394	U	-0.484951	-0.382087	-0.0132663	0.0895974	NC	1.4363	1.53916	1.70294	1.8058	U
100129845	PCOLCE-AS1	NA	NA	NA	NA	NA	5.16993	5.83289	5.16993	5.83289	U	0.222392	-0.921997	-0.440573	-1.58496	NC	5.39232	4.24793	5.39232	4.24793	U
100129924	LOC100129924	NA	NA	NA	NA	NA	6.91886	6.35755	6.91886	6.35755	U	-0.810339	-1.24644	-0.249028	-0.685127	NC	6.10852	5.67243	6.10852	5.67243	U
100129931	LOC100129931	0.417997	0.397695	0.414769	0.394466	NC	-2.52275	-2.53519	-2.52598	-2.53842	D	0.439595	0.674973	0.452032	0.68741	NC	-2.50116	-2.26578	-2.48085	-2.24548	D
100130093	LOC100130093	0.117423	-0.0780025	0.367857	0.172432	NC	-1.86326	-1.97491	-1.61283	-1.72447	D	-0.32577	0.303392	-0.214125	0.415037	NC	-2.30646	-1.67729	-2.11103	-1.48187	D
100130348	TMEM262	NA	NA	NA	NA	NA	5.80735	4.80735	5.80735	4.80735	U	-0.949374	0.402098	0.0506261	1.4021	NC	4.85798	6.20945	4.85798	6.20945	U
100130522	PARD6G-AS1	-0.945552	0.365649	-1.47393	-0.162729	NC	2.9542	2.32193	2.42582	1.79355	U	0.279055	-0.258031	0.911323	0.374237	NC	4.1788	3.64172	2.8676	2.33052	U
100130705	LOC100130705	-0.974005	-0.693897	-1.19265	-0.912537	NC	2	1.98019	1.78136	1.76155	U	-0.203931	-0.747937	-0.184122	-0.728128	NC	2.77007	2.22607	2.48997	1.94596	U
100131454	DBIL5P	1	0	0.263034	-0.736966	NC	2.11548	1.54432	1.37851	0.807355	U	0.343954	0.13245	0.915111	0.703607	NC	1.45943	1.24793	2.45943	2.24793	U
100132273	NDUFA6-AS1	0.0641303	1.39855	-0.968291	0.366128	NC	3.34147	3.16262	2.30905	2.1302	U	-0.478972	0.0508491	-0.300124	0.229697	NC	2.79837	3.32819	1.46395	1.99377	U
100132707	PAXIP1-AS2	0.196589	0.162495	0.168777	0.134684	NC	-1.94153	-2.47354	-1.96934	-2.50135	D	-0.0135465	0.562314	0.518467	1.09433	NC	-2.15166	-1.5758	-2.11757	-1.54171	D
100133036	FAM95B1	2.32193	1	0.277534	-1.04439	NC	3.55459	4.53138	1.51019	2.48699	U	-0.647698	0.645083	-1.62449	-0.331709	NC	0.584963	1.87774	1.90689	3.19967	U
100134229	JHDM1D-AS1	1.03938	1.01588	1.0235	1	NC	1.88075	1.70901	1.86486	1.69313	U	0.682762	0.456011	0.854496	0.627744	NC	1.52412	1.29737	1.54763	1.32087	U
100134938	UPK3BL	-0.111645	-0.313798	0.371481	0.169329	NC	1.03319	1.63894	1.51632	2.12206	U	0.025091	0.10222	-0.580657	-0.503527	NC	1.16993	1.24705	1.37208	1.44921	U
100170841	C17orf96	-0.153826	-0.539377	-0.00182274	-0.387373	NC	-1.33015	-1.66502	-1.17815	-1.51301	D	-0.497015	-0.0418202	-0.162148	0.293047	NC	-1.67334	-1.21814	-1.28779	-0.832592	D
100188947	HECTD2-AS1	-1.07929	-0.518988	0.101283	0.661584	NC	1.38236	1.13434	2.56294	2.31492	U	-0.0163691	-0.805137	0.231651	-0.557117	NC	2.44528	1.65652	1.88498	1.09622	U
100216545	KMT2E-AS1	0.469485	0.469485	0.125531	0.125531	NC	2.38702	1.40808	2.04307	1.06413	U	0.901222	-0.16265	1.88016	0.816288	NC	2.81876	1.75489	2.81876	1.75489	U
100216546	LINC01004	-0.259087	-0.489385	0.0727563	-0.157541	NC	3.1048	3.75416	3.43664	4.086	U	0.504661	0.0933965	-0.144698	-0.555963	NC	3.86854	3.45728	4.09884	3.68758	U
100271715	ARHGEF33	NA	NA	NA	NA	NA	4.58496	4.75489	4.58496	4.75489	U	0.736966	-0.263034	0.567041	-0.432959	NC	5.32193	4.32193	5.32193	4.32193	U
100271835	LIMS3-LOC440895	NA	NA	NA	NA	NA	6.08746	5.97728	6.08746	5.97728	U	0.338802	-0.563901	0.448985	-0.453718	NC	6.42626	5.52356	6.42626	5.52356	U
100287284	MANSC4	NA	NA	NA	NA	NA	4.58496	5.20945	4.58496	5.20945	U	0.624491	-0.0614005	0	-0.685891	NC	5.20945	4.52356	5.20945	4.52356	U
100287569	LINC00173	NA	NA	NA	NA	NA	5.35755	5.04439	5.35755	5.04439	U	0.664816	-0.83399	0.977974	-0.520832	NC	6.02237	4.52356	6.02237	4.52356	U
100288152	LOC100288152	-1.19931	-0.023459	-1.05247	0.123382	NC	2.64572	2.77032	2.79256	2.91716	U	-0.136388	-0.233591	-0.260989	-0.358192	NC	3.70864	3.61143	2.53279	2.43558	U
100288730	PAN3-AS1	0.947533	0.192645	0.111031	-0.643856	NC	2.3322	2.22607	1.4957	1.38957	U	0.622	0.328054	0.728128	0.434183	NC	2.00666	1.71272	2.76155	2.46761	U
100289333	LOC100289333	NA	NA	NA	NA	NA	6.18982	6.79442	6.18982	6.79442	U	0.0389941	-1.10236	-0.565597	-1.70695	NC	6.22882	5.08746	6.22882	5.08746	U
100302243	MIR1972-1	NA	NA	NA	NA	NA	7.2854	7.30378	7.2854	7.30378	U	1.03201	0.909355	1.01363	0.890976	NC	8.31741	8.19476	8.31741	8.19476	U
100316904	SAP25	-0.0389941	-0.556393	0.961006	0.443607	NC	1.51265	1.73408	2.51265	2.73408	U	0.235813	-0.198435	0.0143839	-0.419864	NC	1.78746	1.35321	2.30485	1.87061	U
100329135	TRPC5OS	NA	NA	NA	NA	NA	6.39232	6.33985	6.39232	6.33985	U	0.86507	-0.0885367	0.917538	-0.0360693	NC	7.25739	6.30378	7.25739	6.30378	U
10042	HMGXB4	-0.160285	-0.0360821	0.0964507	0.220654	NC	-1.68399	-1.52026	-1.42725	-1.26352	D	0.0857299	-0.105155	-0.0780025	-0.268887	NC	-1.43797	-1.62886	-1.56218	-1.75306	D
100422737	LOC100422737	NA	NA	NA	NA	NA	4.24793	5.58496	4.24793	5.58496	U	0.610053	0.50696	-0.726982	-0.830075	NC	4.85798	4.75489	4.85798	4.75489	U
100422922	MIR1972-2	NA	NA	NA	NA	NA	7.2854	7.30378	7.2854	7.30378	U	1.03201	0.909355	1.01363	0.890976	NC	8.31741	8.19476	8.31741	8.19476	U
10045	SH2D3A	0.141453	-0.102917	0.219735	-0.0246346	NC	-1.49173	-1.61957	-1.41345	-1.54129	D	-1.08596	-1.08596	-0.958114	-0.958114	NC	-2.71914	-2.71914	-2.47477	-2.47477	D
10046	MAMLD1	0.420576	0.217401	-0.142019	-0.345194	NC	-1.11548	-1.25229	-1.67807	-1.81489	D	0.131245	-0.330541	0.268061	-0.193725	NC	-1.40481	-1.86659	-1.20163	-1.66342	D
100500862	MIR3648-1	0.809897	0.103093	-0.24257	-0.949374	NC	4.59826	3.95017	3.54579	2.8977	U	-1.84271	-0.280791	-1.19462	0.3673	NC	1.94565	3.50757	2.65245	4.21437	U
100505573	INAFM2	0.0489096	-0.255446	0.0995357	-0.20482	NC	-1.21752	-1.48601	-1.1669	-1.43539	D	-0.252187	-0.12059	0.0163018	0.147899	NC	-1.51862	-1.38702	-1.21426	-1.08267	D
100505576	LINC00672	0	0.138447	0.611146	0.749593	NC	1.85547	2.14785	2.46662	2.75899	U	0.608668	0.310988	0.316296	0.0186157	NC	2.46414	2.16646	2.32569	2.02801	U
100505616	SNHG21	0.171187	-0.18133	1.37851	1.026	NC	2.24493	1.66237	3.45226	2.86969	U	0.0540927	-0.468748	0.636661	0.11382	NC	2.12784	1.605	2.48036	1.95752	U
100505621	C11orf72	-0.47492	-0.498935	-0.134586	-0.158601	NC	1.61819	1.81777	1.95852	2.1581	U	-0.0303736	-0.54871	-0.229953	-0.748289	NC	2.06274	1.5444	2.08675	1.56841	U
100505783	OSER1-AS1	0.0390998	-0.213174	0.470079	0.217805	NC	2.36411	1.8276	2.79509	2.25857	U	-0.408381	-0.486043	0.128134	0.050472	NC	1.91663	1.83897	2.1689	2.09124	U
100505811	LOC100505811	-0.709872	-0.511646	0.381871	0.580097	NC	1.63865	1.41076	2.73039	2.5025	U	-0.269637	-0.993427	-0.0417445	-0.765535	NC	2.07889	1.35509	1.88066	1.15687	U
100506060	SMG1P7	-0.349514	-1.26829	0.0831176	-0.835659	NC	1.46419	1.63297	1.89682	2.0656	U	-0.0764628	-0.0565518	-0.245243	-0.225332	NC	1.73724	1.75716	2.65602	2.67593	U
100506084	ARL17B	-1.36678	-1.18845	0.160465	0.338802	NC	1.51972	0.716207	3.04696	2.24345	U	-0.658693	0.240613	0.144817	1.04412	NC	2.22781	3.12711	2.04947	2.94877	U
100506136	LOC100506136	NA	NA	NA	NA	NA	7.11894	6.37504	7.11894	6.37504	U	-0.871014	0.41244	-0.127112	1.15634	NC	6.24793	7.53138	6.24793	7.53138	U
100506233	RAB30-AS1	0.319757	0.476099	0.542149	0.698491	NC	1.66239	1.68281	1.88479	1.9052	U	0.597473	0.563094	0.577057	0.542679	NC	1.94011	1.90573	1.78377	1.74939	U
100506606	LOC100506606	0.791413	0.206451	0.791413	0.206451	NC	3.08746	3.04103	3.08746	3.04103	U	0.582785	0.560826	0.62922	0.607261	NC	2.87883	2.85688	3.4638	3.44184	U
100506713	ALOX12-AS1	0.762308	-0.470891	0.183446	-1.04975	NC	1.88109	2.18004	1.30223	1.60117	U	-0.450166	0.274556	-0.749106	-0.0243842	NC	0.66862	1.39334	1.90182	2.62654	U
100506881	MKLN1-AS	0.222392	-0.134301	-0.239951	-0.596644	NC	2.16636	2.22925	1.70402	1.7669	U	-0.223583	-0.21942	-0.286471	-0.282307	NC	1.72038	1.72455	2.07708	2.08124	U
100507032	TMCC1-AS1	0.0824622	-0.462972	-0.103093	-0.648528	NC	1.80331	1.54674	1.61775	1.36119	U	0.245366	0.175318	0.501931	0.431883	NC	1.96621	1.89616	2.51165	2.4416	U
100507062	PSMD6-AS2	-0.744743	-0.399607	-1.44876	-1.10362	NC	1.67516	1.96467	0.971145	1.26065	U	0.632738	0.929064	0.343232	0.639557	NC	3.05264	3.34897	2.70751	3.00383	U
100507297	TMEM44-AS1	-0.380031	-2.04629	0.980371	-0.685891	NC	1.28189	1.79647	2.6423	3.15687	U	0.660004	0.251539	0.14543	-0.263034	NC	2.32193	1.91346	3.98819	3.57973	U
100507540	LINC01504	1.73697	1	0.321928	-0.415037	NC	4.69116	5.41504	3.27612	4	U	0.444975	0.239575	-0.278901	-0.4843	NC	3.39917	3.19377	4.13614	3.93074	U
100507557	LOC100507557	-0.605221	-0.196756	-0.599462	-0.190997	NC	-2.35683	-2.21666	-2.35107	-2.2109	D	0.0291463	0.36257	-0.111031	0.222392	NC	-1.72247	-1.38904	-2.13093	-1.79751	D
100507633	TNKS2-AS1	NA	NA	NA	NA	NA	5.20945	4.24793	5.20945	4.24793	U	-0.887525	-1.03953	0.0740006	-0.0780025	NC	4.32193	4.16993	4.32193	4.16993	U
100507634	LOC100507634	-0.0489096	0.0931094	0.273018	0.415037	NC	1.61667	1.02385	1.9386	1.34577	U	-0.183712	-0.304393	0.409113	0.288431	NC	1.48187	1.36119	1.33985	1.21917	U
100532726	NDUFC2-KCTD14	0.0309246	0.600904	-0.576307	-0.00632762	NC	-1.36463	-2.05889	-1.97186	-2.66613	D	-0.0828264	-1.71444	0.611435	-1.02018	NC	-1.47838	-3.11	-2.04836	-3.67998	D
100533182	SEC24B-AS1	-1.13358	-0.360469	-1.17232	-0.399201	NC	1.65675	1.69363	1.61802	1.6549	U	-0.370596	-0.230717	-0.407472	-0.267593	NC	2.41974	2.55962	1.64663	1.78651	U
100616127	MIR4448	0.156011	0.454623	0.185172	0.483784	NC	3.22646	4.01244	3.25562	4.0416	U	0.128943	-0.519913	-0.65704	-1.3059	NC	3.19939	2.55054	2.90078	2.25192	U
100616240	MIR4496	NA	NA	NA	NA	NA	8.99718	9.01681	8.99718	9.01681	U	0.0362435	-0.0872864	0.0166147	-0.106915	NC	9.03342	8.90989	9.03342	8.90989	U
10073	SNUPN	0.259627	0.213823	0.745929	0.700125	NC	-1.36863	-2.48222	-0.882324	-1.99592	D	-0.206161	-0.121769	0.907434	0.991826	NC	-1.83441	-1.75002	-1.78861	-1.70422	D
100861532	RNA45S5	0.0688028	0.409801	0.304681	0.645679	NC	3.17018	3.74201	3.40606	3.97789	U	0.220105	0.750017	-0.351722	0.178191	NC	3.32149	3.8514	2.98049	3.5104	U
100862728	UPK1A-AS1	0.857981	-0.830075	0.610053	-1.078	NC	1.67243	2.33985	1.4245	2.09192	U	0.912537	1.09576	0.245112	0.428334	NC	1.72698	1.9102	3.41504	3.59826	U
100874037	CADM2-AS2	0.0931094	0.0931094	0.912537	0.912537	NC	1.53605	1.22239	2.35548	2.04182	U	0.756729	0.186413	1.07039	0.500074	NC	2.19967	1.62936	2.19967	1.62936	U
100874126	LINC00331	0.748461	-0.251539	-0.131245	-1.13124	NC	3.32193	3.53605	2.44222	2.65635	U	-0.506353	-0.899695	-0.720477	-1.11382	NC	2.06711	1.67377	3.06711	2.67377	U
100996255	LOC100996255	0.069709	0.0899814	0.142958	0.16323	NC	2.39978	2.99015	2.47303	3.0634	U	-0.604721	-0.69167	-1.19509	-1.28204	NC	1.72535	1.6384	1.70508	1.61813	U
100996291	LOC100996291	-1.0813	-0.867896	0.275634	0.489038	NC	0.244804	1.72605	1.60174	3.08299	U	0.694655	0.832158	-0.786596	-0.649093	NC	2.02076	2.15826	1.80735	1.94486	U
100996541	FAM157C	-0.948926	-1.75002	-0.319417	-1.12051	NC	1.02097	1.56314	1.65048	2.19265	U	-0.226669	-0.393319	-0.768837	-0.935487	NC	1.74322	1.57657	2.54432	2.37767	U
100996669	LINC01544	0.616671	0.450661	0.394279	0.228269	NC	1.24286	1.848	1.02046	1.6256	U	1.38163	0.631613	0.776494	0.0264722	NC	2.00782	1.2578	2.17383	1.42381	U
10137	RBM12	0.217194	0.234774	-0.289614	-0.272034	NC	-1.19568	-2.10887	-1.70249	-2.61567	D	-0.440909	-0.2855	0.472275	0.627683	NC	-1.85379	-1.69838	-1.87137	-1.71596	D
101410533	YTHDF3-AS1	NA	NA	NA	NA	NA	5.20945	5.20945	5.20945	5.20945	U	0.597902	0.899071	0.597902	0.899071	NC	5.80735	6.10852	5.80735	6.10852	U
10156	RASA4	-0.226965	-0.582682	0.0881309	-0.267585	NC	1.8699	2.06035	2.18499	2.37545	U	0.366451	0.0718756	0.175993	-0.118582	NC	2.46331	2.16874	2.81903	2.52445	U
10165	SLC25A13	0.125232	0.0699626	-0.327831	-0.383101	NC	-1.31745	-1.33996	-1.77052	-1.79303	D	-0.35811	-0.106572	-0.335603	-0.0840643	NC	-1.8008	-1.54926	-1.74553	-1.49399	D
10171	RCL1	-0.096602	0.0609852	-0.049753	0.107834	NC	-2.02767	-1.619	-1.98082	-1.57215	D	-0.342392	-0.183963	-0.751066	-0.592636	NC	-2.27346	-2.11503	-2.43105	-2.27262	D
10184	LHFPL2	0.864345	0.809115	0.647247	0.592017	NC	-1.59984	-2.33431	-1.81693	-2.55141	D	0.0148733	0.0222528	0.749349	0.756729	NC	-2.44931	-2.44193	-2.39408	-2.3867	D
101926900	DNAJB5-AS1	NA	NA	NA	NA	NA	8.94251	9.32418	8.94251	9.32418	U	0.929391	0.531191	0.547725	0.149525	NC	9.87191	9.47371	9.87191	9.47371	U
101927055	LOC101927055	NA	NA	NA	NA	NA	5.72792	4.75489	5.72792	4.75489	U	-0.370368	-1.47999	0.602665	-0.50696	NC	5.35755	4.24793	5.35755	4.24793	U
101927136	LOC101927136	0.752072	-0.662965	0.508147	-0.906891	NC	2.73507	2.96153	2.49114	2.7176	U	-0.01145	-0.346369	-0.23791	-0.572829	NC	1.97154	1.63662	3.38658	3.05166	U
101927142	LOC101927142	NA	NA	NA	NA	NA	7.2854	6.45943	7.2854	6.45943	U	-0.809669	-0.251979	0.0163018	0.573991	NC	6.47573	7.03342	6.47573	7.03342	U
101927178	LOC101927178	0.71843	-0.332196	0.440128	-0.610498	NC	1.95848	2.08445	1.68018	1.80615	U	0.443065	-0.246283	0.317095	-0.372253	NC	1.68312	0.993768	2.73374	2.04439	U
101927242	LINC01430	NA	NA	NA	NA	NA	5.97728	6	5.97728	6	U	-0.97728	-1.07039	-1	-1.09311	NC	5	4.90689	5	4.90689	U
101927599	ZNF529-AS1	-1.15308	-1.93377	-0.30895	-1.08964	NC	1.26263	0.965707	2.10676	1.80984	U	-0.0409303	-0.347373	0.255994	-0.050449	NC	2.37478	2.06834	3.15547	2.84902	U
101927612	RNF139-AS1	-0.764372	-0.295985	-0.0389941	0.429393	NC	1.58884	1.6788	2.31421	2.40418	U	0.832008	0.857848	0.742044	0.767884	NC	3.18521	3.21105	2.71683	2.74267	U
101927746	LOC101927746	-1.06354	-0.784635	-0.798537	-0.519636	NC	-3.38091	-2.84604	-3.11591	-2.58104	D	1.13544	-0.0938669	0.600559	-0.628744	NC	-1.18194	-2.41124	-1.46084	-2.69014	D
101927797	LOC101927797	-0.424849	0.154135	-0.237148	0.341836	NC	1.35514	1.55714	1.54284	1.74484	U	0.406936	-0.0847941	0.20494	-0.286791	NC	2.18693	1.6952	1.60794	1.11621	U
101928035	LOC101928035	NA	NA	NA	NA	NA	3.70044	4.75489	3.70044	4.75489	U	1.65711	0.943416	0.602665	-0.111031	NC	5.35755	4.64386	5.35755	4.64386	U
101928100	LOC101928100	-1.16993	-1.16993	-0.169925	-0.169925	NC	1.83007	1.47393	2.83007	2.47393	U	-0.573735	-0.573735	-0.217591	-0.217591	NC	2.42626	2.42626	2.42626	2.42626	U
101928243	DARS-AS1	-0.133809	-0.297751	-0.137168	-0.30111	NC	1.40491	1.54979	1.40155	1.54643	U	-0.05699	0.017671	-0.201864	-0.127203	NC	1.48173	1.55639	1.64567	1.72033	U
101928370	LOC101928370	1	0	0	-1	NC	-3.32193	-3.32193	-4.32193	-4.32193	D	NA	NA	NA	NA	NA	-4.32193	-4.32193	-3.32193	-3.32193	D
101928372	LOC101928372	-0.565657	-0.769727	-0.663896	-0.867966	NC	1.37621	1.29324	1.27797	1.195	U	-0.193221	-0.229224	-0.110251	-0.146253	NC	1.74865	1.71264	1.95272	1.91671	U
101928445	LOC101928445	-0.718229	0.556393	-0.403356	0.871267	NC	5.15492	5.15967	5.46979	5.47455	U	0.638734	0.135553	0.633978	0.130797	NC	6.51188	6.0087	5.23726	4.73408	U
101928525	LOC101928525	-0.165233	-0.404991	0.0752554	-0.164503	NC	-1.72746	-1.47711	-1.48697	-1.23663	D	-0.0608122	-0.289807	-0.31116	-0.540155	NC	-1.62304	-1.85204	-1.38328	-1.61228	D
101928649	CTC-338M12.4	1	0.443835	0.81806	0.261894	NC	1.62826	2.04768	1.44632	1.86574	U	1.06979	1.19453	0.65037	0.775104	NC	1.69805	1.82278	2.25422	2.37895	U
101928720	LINC01509	NA	NA	NA	NA	NA	4.80735	3.80735	4.80735	3.80735	U	0.61891	-1.10692	1.61891	-0.106915	NC	5.42626	3.70044	5.42626	3.70044	U
101928857	CTD-3080P12.3	0.552541	0.793549	0.758992	1	NC	2.70782	2.30256	2.91427	2.50901	U	0.243271	0.21818	0.648528	0.623437	NC	2.39855	2.37346	2.15754	2.13245	U
101929086	LINC01447	0.757143	-0.304257	0.757143	-0.304257	NC	1.99746	1.38163	1.99746	1.38163	U	0.380272	0.154291	0.996096	0.770115	NC	1.62059	1.39461	2.68199	2.45601	U
101929127	PGM5P3-AS1	-0.287151	-0.131681	0.334931	0.490401	NC	-2.87447	-1.23856	-2.25239	-0.616473	D	1.06228	0.853095	-0.573629	-0.782818	NC	-1.52503	-1.73422	-1.6805	-1.88969	D
101929340	LOC101929340	0.491853	0.0443941	0.40439	-0.0430687	NC	2.10852	2.5157	2.02106	2.42824	U	0.407175	0.685891	0	0.278716	NC	2.02385	2.30256	2.47131	2.75002	U
101929423	MEF2C-AS1	NA	NA	NA	NA	NA	3.90689	3.90689	3.90689	3.90689	U	1.04731	0.900464	1.04731	0.900464	NC	4.9542	4.80735	4.9542	4.80735	U
101929439	LOC101929439	NA	NA	NA	NA	NA	6.04439	6.47573	6.04439	6.47573	U	0.447459	-0.343954	0.0161197	-0.775294	NC	6.49185	5.70044	6.49185	5.70044	U
101929596	LOC101929596	NA	NA	NA	NA	NA	6.84549	6.53916	6.84549	6.53916	U	-0.11757	-0.597563	0.188762	-0.291231	NC	6.72792	6.24793	6.72792	6.24793	U
101929736	LINC01372	-0.0857299	0.509014	-0.0857299	0.509014	NC	1.84645	2.73419	1.84645	2.73419	U	0.810658	-0.0874628	-0.0770762	-0.975197	NC	2.74284	1.84472	2.1481	1.24998	U
101954266	RNVU1-14	-0.0310269	-0.0310269	-0.0462937	-0.0462937	NC	3.08566	3.27672	3.07039	3.26145	U	0.62185	-0.280495	0.430788	-0.471558	NC	3.73853	2.83619	3.73853	2.83619	U
10200	MPHOSPH6	0.324686	0.493061	0.457245	0.625621	NC	-2.35228	-1.28446	-2.21972	-1.1519	D	1.08453	0.885731	0.0167128	-0.182089	NC	-1.59244	-1.79124	-1.76081	-1.95961	D
1021	CDK6	0.0699772	-0.0905568	-0.345987	-0.506521	NC	-1.87118	-2.79627	-2.28714	-3.21224	D	0.10044	0.0179777	1.02554	0.943073	NC	-1.84071	-1.92318	-1.68018	-1.76264	D
102157402	AK6	-0.153296	-0.0437035	0.577864	0.687456	NC	-2.44958	-1.85827	-1.71842	-1.12711	D	-0.098628	0.281976	-0.689932	-0.309328	NC	-2.39491	-2.0143	-2.5045	-2.1239	D
10221	TRIB1	0.556073	0.338264	-0.0552661	-0.273075	NC	-1.92967	-2.71239	-2.541	-3.32373	D	-0.102028	0.334599	0.680694	1.11732	NC	-2.58777	-2.15114	-2.36996	-1.93333	D
10230	NBR2	-1.16851	-1.44953	0.250323	-0.0306968	NC	1.30364	1.28044	2.72247	2.69927	U	0.432192	0.119189	0.455387	0.142384	NC	2.90433	2.59133	3.18536	2.87235	U
10233	LRRC23	-0.039801	-0.039801	0.473371	0.473371	NC	2.71621	3.39745	3.22938	3.91062	U	0.320135	-0.0782514	-0.361107	-0.759493	NC	3.07614	2.67776	3.07614	2.67776	U
10236	HNRNPR	0.0558945	0.135133	-0.0371132	0.0421255	NC	-1.60381	-1.80817	-1.69682	-1.90118	D	0.156944	0.28229	0.361302	0.486648	NC	-1.50276	-1.37742	-1.582	-1.45665	D
10252	SPRY1	0.0715533	0.106042	-0.349584	-0.315096	NC	-3.10128	-3.75336	-3.52242	-4.1745	D	1.1375	0.347923	1.78958	1	NC	-2.03533	-2.82491	-2.06982	-2.8594	D
10257	ABCC4	-0.219381	-0.278494	-0.619644	-0.678757	NC	-1.56253	-0.942373	-1.96279	-1.34264	D	-0.263034	-0.526069	-0.883186	-1.14622	NC	-1.60618	-1.86921	-1.54707	-1.8101	D
102723099	GHET1	0.481127	0.142958	0.0945456	-0.243623	NC	1.25739	2.31288	0.870807	1.9263	U	0.43842	0.472799	-0.617075	-0.582696	NC	1.21468	1.24906	1.55285	1.58723	U
102723332	LINC00412	NA	NA	NA	NA	NA	4.9542	6.76818	4.9542	6.76818	U	-0.954196	0.903785	-2.76818	-0.910203	NC	4	5.85798	4	5.85798	U
102723544	LOC102723544	NA	NA	NA	NA	NA	6.35755	7.37504	6.35755	7.37504	U	1.25716	-0.0907655	0.23967	-1.10825	NC	7.61471	6.26679	7.61471	6.26679	U
102724855	CTD-2151A2.1	0	0	0	0	NA	-3.58496	-3.58496	-3.58496	-3.58496	D	NA	NA	NA	NA	NA	-3.58496	-3.58496	-3.58496	-3.58496	D
10287	RGS19	0.345809	0.32235	0.281771	0.258312	NC	-3.19657	-4.77189	-3.26061	-4.83592	D	-0.589812	-0.861617	0.9855	0.713696	NC	-4.13219	-4.404	-4.10874	-4.38054	D
1031	CDKN2C	-1.42561	-0.132248	-0.787006	0.506353	NC	1.39782	1.21938	2.03642	1.85798	U	0.11517	0.13714	0.293612	0.315583	NC	2.9386	2.96057	1.64524	1.66721	U
10322	SMYD5	-0.357744	-0.213448	-0.251381	-0.107085	NC	-1.7237	-2.05753	-1.61733	-1.95116	D	-0.361845	-0.590051	-0.0280144	-0.256221	NC	-1.7278	-1.956	-1.87209	-2.1003	D
10342	TFG	0.0874724	0.222648	0.136646	0.271822	NC	-1.31754	-1.69837	-1.26837	-1.64919	D	-0.144539	0.0273276	0.236287	0.408154	NC	-1.54955	-1.37768	-1.68473	-1.51286	D
10350	ABCA9	0.203533	-0.0220263	0.389947	0.164387	NC	1.66297	1.77578	1.84938	1.9622	U	-0.264416	0.303868	-0.377235	0.191048	NC	1.19502	1.7633	1.42058	1.98886	U
103504731	MIR3648-2	0.809897	0.103093	-0.24257	-0.949374	NC	4.59826	3.95017	3.54579	2.8977	U	-1.84271	-0.280791	-1.19462	0.3673	NC	1.94565	3.50757	2.65245	4.21437	U
1036	CDO1	-0.547488	-0.365284	0.793549	0.975752	NC	1.7577	2.02354	3.09873	3.36457	U	0.123658	0.198947	-0.14218	-0.0668919	NC	2.42884	2.50413	2.24664	2.32193	U
103625681	LLPH-AS1	-0.0431272	-0.341616	0.134422	-0.164067	NC	1.40996	1.76934	1.58751	1.94689	U	0.130881	-0.271929	-0.228496	-0.631305	NC	1.58397	1.18116	1.88246	1.47965	U
103689912	TBX2-AS1	0.370838	-0.273018	-0.0565835	-0.70044	NC	2.57247	1.2713	2.14505	0.843881	U	-1.02106	-0.860597	0.280108	0.440573	NC	1.18057	1.34104	1.82443	1.98489	U
10388	SYCP2	1.70044	0.584963	0.530515	-0.584963	NC	4	3.80735	2.83007	2.63743	U	0.523562	0.357552	0.716207	0.550197	NC	2.82312	2.65711	3.9386	3.77259	U
10398	MYL9	-0.221626	-0.107895	-0.108387	0.00534473	NC	-1.44457	-1.57019	-1.33133	-1.45695	D	-0.146773	-0.74243	-0.0211543	-0.616811	NC	-1.36971	-1.96537	-1.48345	-2.0791	D
1040	CDS1	-0.144934	-0.314621	-0.252834	-0.422521	NC	-1.6538	-1.83257	-1.7617	-1.94047	D	-0.228734	0	-0.0499685	0.178765	NC	-1.7376	-1.50887	-1.56791	-1.33918	D
10435	CDC42EP2	-0.670412	-0.557258	-0.68972	-0.576567	NC	-1.442	-3.04772	-1.4613	-3.06703	D	-1.04713	-1.52566	0.558587	0.0800644	NC	-1.81872	-2.29724	-1.93187	-2.41039	D
10445	MCRS1	-0.296678	-0.393237	0.101895	0.00533591	NC	-1.30354	-1.81651	-0.904971	-1.41794	D	-0.394744	-0.324119	0.118222	0.188846	NC	-1.40161	-1.33098	-1.30505	-1.23443	D
10452	TOMM40	-0.110894	-0.2265	0.070938	-0.044668	NC	-1.87862	-1.81607	-1.69679	-1.63424	D	0.0211531	-0.0544174	-0.0413979	-0.116968	NC	-1.74658	-1.82215	-1.63097	-1.70654	D
10454	TAB1	0.23124	-0.00691941	0.0806185	-0.157541	NC	-1.59883	-1.84938	-1.74946	-2	D	0.170699	0.345432	0.421243	0.595975	NC	-1.65938	-1.48464	-1.42122	-1.24648	D
10482	NXF1	0.200312	0.159014	0.465723	0.424425	NC	2.62354	2.66359	2.88895	2.929	U	-0.0966379	-0.434901	-0.136687	-0.47495	NC	2.32659	1.98833	2.36789	2.02963	U
10492	SYNCRIP	-0.223802	0.00304886	-0.385119	-0.158268	NC	-2.631	-2.71637	-2.79232	-2.87769	D	0.443478	0.450945	0.528852	0.536319	NC	-1.96372	-1.95625	-2.19057	-2.1831	D
10500	SEMA6C	0.730393	-0.137504	1.73039	0.862496	NC	2.48308	2.60126	3.48308	3.60126	U	-0.235155	0.128948	-0.353337	0.0107664	NC	1.51753	1.88164	2.38543	2.74953	U
10514	MYBBP1A	-0.248366	-0.804137	-0.435766	-0.991537	NC	-2.16803	-2.2423	-2.35543	-2.4297	D	0.180672	0.115346	0.254942	0.189616	NC	-1.73899	-1.80432	-1.18322	-1.24855	D
1052	CEBPD	-0.0851737	-0.0402178	-0.0977133	-0.0527573	NC	-3.82292	-4.33736	-3.83545	-4.3499	D	0.623748	0.920716	1.13819	1.43516	NC	-3.11399	-2.81703	-3.15895	-2.86198	D
10520	ZNF211	1.45721	0.898717	0.913585	0.355095	NC	2.90852	3.01822	2.3649	2.4746	U	-0.00652804	-0.19125	-0.116232	-0.300954	NC	1.44478	1.26006	2.00328	1.81855	U
10580	SORBS1	0.0931094	0.0627358	0.0614005	0.0310269	NC	4.33311	3.77727	4.3014	3.74556	U	-0.650033	-1.27037	-0.094201	-0.714538	NC	3.58996	2.96963	3.62034	3	U
1059	CENPB	-0.129848	-0.161266	0.0906287	0.0592109	NC	-1.80243	-1.95972	-1.58196	-1.73925	D	-0.286144	-0.295158	-0.128855	-0.137869	NC	-1.95873	-1.96774	-1.92731	-1.93633	D
10602	CDC42EP3	-0.137504	0.0053983	-0.28883	-0.145929	NC	1.90932	1.70013	1.758	1.5488	U	-0.352577	-0.643361	-0.143383	-0.434167	NC	1.69425	1.40346	1.55135	1.26056	U
10614	HEXIM1	-0.0974224	-0.161455	0.00144053	-0.0625916	NC	1.84136	1.8711	1.94023	1.96996	U	0.0400003	0.0293679	0.0102644	-0.000367941	NC	1.97879	1.96816	2.04282	2.03219	U
10626	TRIM16	-0.736274	-0.776244	-0.74414	-0.784111	NC	-2.55578	-2.77696	-2.56365	-2.78482	D	-0.506575	-0.633367	-0.285402	-0.412195	NC	-2.32608	-2.45288	-2.28611	-2.41291	D
10629	TAF6L	0.305433	0.0090831	0.465898	0.169548	NC	-2.98489	-2.38399	-2.82443	-2.22352	D	0.707819	1.10434	0.106915	0.503433	NC	-2.58251	-2.18599	-2.28616	-1.88964	D
10634	GAS2L1	0.430529	0.277309	0.266444	0.113224	NC	-1.78984	-2.12672	-1.95392	-2.29081	D	-0.358527	-0.410321	-0.0216408	-0.0734354	NC	-2.57889	-2.63069	-2.42567	-2.47747	D
10637	LEFTY1	NA	NA	NA	NA	NA	4.58496	4.52356	4.58496	4.52356	U	-0.337035	-0.337035	-0.275634	-0.275634	NC	4.24793	4.24793	4.24793	4.24793	U
10644	IGF2BP2	-0.190558	-0.252191	-0.492003	-0.553635	NC	-1.45423	-2.03112	-1.75568	-2.33257	D	-0.4668	-0.252675	0.110089	0.324214	NC	-1.73047	-1.51635	-1.66884	-1.45472	D
10664	CTCF	0.392951	0.34832	0.401857	0.357225	NC	-1.61298	-1.80902	-1.60407	-1.80011	D	0.379817	0.0168738	0.57586	0.212917	NC	-1.62611	-1.98905	-1.58148	-1.94442	D
10677	AVIL	0	0.724366	0.616671	1.34104	NC	2.30933	1.60572	2.926	2.22239	U	-0.174679	-0.49304	0.528928	0.210567	NC	2.13465	1.81629	1.41028	1.09192	U
10699	CORIN	0.341037	0.341037	0.341037	0.341037	NC	4.61667	4.42403	4.61667	4.42403	U	-0.0682347	0.183797	0.12441	0.376442	NC	4.2074	4.45943	4.2074	4.45943	U
10737	RFPL3S	-1.53952	-0.0709665	-0.783189	0.685364	NC	2.67987	2.54201	3.43621	3.29834	U	0.529267	0.292451	0.667131	0.430315	NC	4.74866	4.51184	3.28011	3.04329	U
10743	RAI1	0.367545	-0.259749	-0.226855	-0.854149	NC	-1.86999	-2.40659	-2.46439	-3.00099	D	-0.0164881	0.245625	0.520111	0.782224	NC	-2.25402	-1.99191	-1.62673	-1.36462	D
10747	MASP2	-0.594878	-0.0743473	-0.22097	0.29956	NC	1.42489	0.939458	1.79879	1.31337	U	0.755978	0.177538	1.2414	0.662965	NC	2.77574	2.1973	2.25521	1.67677	U
10783	NEK6	1.20645	0.626398	1.074	0.493948	NC	-1.16552	-1.89308	-1.29797	-2.02554	D	0.0335526	0.229648	0.761119	0.957215	NC	-2.33842	-2.14232	-1.75836	-1.56227	D
10797	MTHFD2	-0.428671	-0.163856	-0.457669	-0.192854	NC	1.23581	1.30656	1.20681	1.27756	U	-0.461013	0.0075688	-0.531764	-0.0631818	NC	1.20346	1.67205	0.938648	1.40723	U
10799	RPP40	-1.46367	-1.05276	-1.14622	-0.735311	NC	-5.29039	-3.77193	-4.97294	-3.45447	D	1.03847	2.01937	-0.479993	0.500898	NC	-2.78825	-1.80735	-3.19916	-2.21826	D
10866	HCP5	-0.407658	0.106915	-0.351074	0.163499	NC	1.43296	1.15256	1.48954	1.20914	U	-0.165308	0.0325128	0.115093	0.312914	NC	1.67531	1.87313	1.16074	1.35856	U
10884	MRPS30	0.127643	0.240311	-0.148517	-0.0358483	NC	-1.1819	-1.75867	-1.45806	-2.03483	D	-0.350292	-0.0773937	0.226474	0.499372	NC	-1.65984	-1.38694	-1.7725	-1.49961	D
10887	PROKR1	NA	NA	NA	NA	NA	3.45943	3.45943	3.45943	3.45943	U	1.06413	-0.137504	1.06413	-0.137504	NC	4.52356	3.32193	4.52356	3.32193	U
10915	TCERG1	-0.11112	-0.213323	-0.360162	-0.462364	NC	-1.91247	-1.47249	-2.16151	-1.72153	D	0.0868048	0.31969	-0.353179	-0.120294	NC	-1.71455	-1.48166	-1.61234	-1.37946	D
10919	EHMT2	0.539191	0.0874039	0.728265	0.276478	NC	-1.28097	-3.3533	-1.09189	-3.16423	D	-1.05707	-1.68833	1.01527	0.384011	NC	-2.87723	-3.50848	-2.42544	-3.0567	D
10927	SPIN1	0.073218	-0.0787851	-0.377367	-0.52937	NC	-1.19757	-1.83181	-1.64816	-2.2824	D	-0.444037	-0.400753	0.190206	0.23349	NC	-1.71483	-1.67154	-1.56282	-1.51954	D
10938	EHD1	-0.635818	-0.711033	-0.664232	-0.739447	NC	1.42145	1.38074	1.39304	1.35233	U	-0.83013	-0.874367	-0.789417	-0.833654	NC	1.22714	1.18291	1.30236	1.25812	U
10940	POP1	-0.49582	-0.84443	-0.457828	-0.806439	NC	-2.90332	-2.01436	-2.86533	-1.97636	D	-0.140178	0.289507	-1.02915	-0.599462	NC	-2.54768	-2.118	-2.19907	-1.76939	D
10999	SLC27A4	-0.0346343	-0.295167	0.0395979	-0.220935	NC	-2.88674	-2.83699	-2.81251	-2.76276	D	1.17514	1.23781	1.12539	1.18805	NC	-1.67697	-1.6143	-1.41644	-1.35377	D
11040	PIM2	-0.665108	-0.433431	-0.465101	-0.233424	NC	1.28091	1.00342	1.48092	1.20343	U	-0.495759	-0.620296	-0.218267	-0.342804	NC	1.45026	1.32573	1.21859	1.09405	U
11044	PAPD7	0.649145	0.482355	0.141389	-0.0254002	NC	-0.715057	-1.32372	-1.22281	-1.83147	D	-0.125798	0.0204227	0.482864	0.629085	NC	-1.49	-1.34378	-1.32321	-1.17699	D
1105	CHD1	0.503882	0.48386	0.150041	0.130018	NC	-1.58967	-1.79177	-1.94351	-2.14562	D	0.277888	0.711279	0.479993	0.913384	NC	-1.81566	-1.38227	-1.79564	-1.36225	D
11060	WWP2	0.172681	-0.160302	-0.147591	-0.480574	NC	-0.961889	-1.45702	-1.28216	-1.77729	D	-0.487578	-0.251795	0.00755339	0.243336	NC	-1.62215	-1.38636	-1.28916	-1.05338	D
11091	WDR5	-0.0257526	-0.200039	-0.0419045	-0.216191	NC	-1.33475	-1.40829	-1.3509	-1.42444	D	-0.0781651	-0.125265	-0.0046265	-0.0517263	NC	-1.38716	-1.43426	-1.21287	-1.25997	D
11123	RCAN3	-0.00966633	0.24323	-0.645891	-0.392996	NC	-1.32555	-2.73456	-1.96177	-3.37078	D	-1.30095	-0.508549	0.10806	0.900464	NC	-2.61683	-1.82443	-2.86973	-2.07732	D
11137	PWP1	-0.248332	-0.0377018	-0.116856	0.0937739	NC	-1.47843	-1.43696	-1.34696	-1.30548	D	-0.342741	-0.303264	-0.384218	-0.344741	NC	-1.57284	-1.53336	-1.78347	-1.744	D
11157	LSM6	-0.0429909	0.369399	0.0830068	0.495397	NC	-1.72928	-2.44793	-1.60329	-2.32193	D	0.522636	0.449727	1.24128	1.16837	NC	-1.16366	-1.23657	-1.57605	-1.64896	D
11159	RABL2A	NA	NA	NA	NA	NA	9.21189	7.29462	9.21189	7.29462	U	-1.06723	-0.427253	0.850037	1.49001	NC	8.14466	8.78463	8.14466	8.78463	U
11187	PKP3	0.289067	-0.217008	0.177901	-0.328173	NC	-1.0947	-1.43565	-1.20587	-1.54682	D	-0.385831	0.0313155	-0.0448801	0.372266	NC	-1.7696	-1.35245	-1.26353	-0.84638	D
11189	CELF3	-1.70044	-0.241008	-0.321928	1.1375	NC	1.34395	0.943416	2.72247	2.32193	U	-1.34395	-0.343954	-0.943416	0.0565835	NC	1.70044	2.70044	0.241008	1.24101	U
112869	CCDC101	0.110433	-0.115902	0.241151	0.014816	NC	-2.32789	-1.95398	-2.19717	-1.82327	D	-0.395255	0.206451	-0.769163	-0.167457	NC	-2.83358	-2.23187	-2.60724	-2.00554	D
112950	MED8	-0.438996	-0.104061	-0.160823	0.174112	NC	-1.75753	-2.21272	-1.47935	-1.93455	D	-0.0308793	-0.35628	0.424315	0.098915	NC	-1.34941	-1.67481	-1.68434	-2.00974	D
113000	RPUSD1	-0.296032	-0.579058	-0.0969738	-0.38	NC	-2.02529	-2.19035	-1.82624	-1.99129	D	-0.499255	-0.710076	-0.334195	-0.545017	NC	-2.22852	-2.43934	-1.94549	-2.15631	D
1133	CHRM5	NA	NA	NA	NA	NA	5.55459	5.55459	5.55459	5.55459	U	0.145851	0.968973	0.145851	0.968973	NC	5.70044	6.52356	5.70044	6.52356	U
11343	MGLL	0.463401	0.315862	0.259867	0.112329	NC	-2.10098	-1.8141	-2.30451	-2.01763	D	0.735522	0.851999	0.448641	0.565118	NC	-1.82886	-1.71238	-1.68132	-1.56484	D
113451	AZIN2	-1	0.963474	-0.378512	1.58496	NC	3.74416	3.24793	4.36565	3.86942	U	-0.590356	-0.0437214	-0.0941222	0.452512	NC	4.15381	4.70044	2.19033	2.73697	U
1136	CHRNA3	-0.584963	-0.206451	-0.0703893	0.308122	NC	1.87447	0.707819	2.38904	1.22239	U	-1.2578	-0.874469	-0.0911479	0.292181	NC	1.20163	1.58496	0.823122	1.20645	U
113622	ADPRHL1	-0.712718	0.109823	-0.602665	0.219877	NC	2.05399	1.88112	2.16405	1.99118	U	-0.444785	-0.849175	-0.271913	-0.676303	NC	2.32193	1.91754	1.49939	1.095	U
1137	CHRNA4	NA	NA	NA	NA	NA	3.80735	3.80735	3.80735	3.80735	U	0.440573	0.36257	0.440573	0.36257	NC	4.24793	4.16993	4.24793	4.16993	U
113791	PIK3IP1	-0.887525	-0.7176	0.929611	1.09954	NC	2.1304	1.1481	3.94753	2.96523	U	0.218571	-0.681639	1.20087	0.300659	NC	3.23649	2.33628	3.06657	2.16636	U
113828	FAM83F	-0.0484985	0.564953	0.255655	0.869106	NC	-2.3339	-3.3339	-2.02975	-3.02975	D	0.874469	-0.4975	1.87447	0.5025	NC	-1.41093	-2.7829	-2.02438	-3.39635	D
114034	TOE1	0.323605	0.149274	0.37483	0.2005	NC	-1.95053	-1.93441	-1.89931	-1.88319	D	0.116724	0.224706	0.100604	0.208587	NC	-2.15741	-2.04943	-1.98308	-1.8751	D
114134	SLC2A13	1.21573	1.19555	0.469485	0.449307	NC	2.20568	1.68966	1.45943	0.943416	U	0.274757	0.588322	0.790772	1.10434	NC	1.2647	1.57827	1.28488	1.59845	U
114787	GPRIN1	0.327007	-0.13714	0.367545	-0.096602	NC	-1.73818	-2.09384	-1.69764	-2.0533	D	0.244734	0.181998	0.600393	0.537657	NC	-1.82045	-1.88319	-1.3563	-1.41904	D
114794	ELFN2	0.830075	0.289507	0.4975	-0.0430687	NC	-4.16993	-2.29546	-4.5025	-2.62803	D	-0.584963	1	-2.45943	-0.874469	NC	-5.58496	-4	-5.04439	-3.45943	D
114795	TMEM132B	-0.169925	-0.710493	-0.0874628	-0.628031	NC	1.80735	1.85244	1.88982	1.9349	U	-0.807355	-0.453718	-0.852443	-0.498806	NC	1.16993	1.52356	1.71049	2.06413	U
114796	PSMG3-AS1	-0.160465	0.706269	0.0874628	0.954196	NC	3.20328	2.50696	3.45121	2.75489	U	0.449656	-0.0503317	1.14598	0.645992	NC	3.8134	3.31342	2.94667	2.44668	U
114818	KLHL29	-0.279574	-0.673594	-0.425209	-0.819229	NC	1.9024	1.73846	1.75676	1.59282	U	-0.347651	-0.30998	-0.183712	-0.146042	NC	1.83432	1.87199	2.22834	2.26601	U
114821	ZBED9	0.0874628	0.97728	-1.17932	-0.289507	NC	2.8009	2.24793	1.53411	0.981141	U	-0.391509	0.0570811	0.161463	0.610053	NC	2.32193	2.77052	1.43211	1.8807	U
114900	C1QTNF4	-0.485427	-1.04182	-0.485427	-1.04182	NC	2.14684	3.50734	2.14684	3.50734	U	0.27077	0.215729	-1.08973	-1.14477	NC	2.90304	2.848	3.45943	3.40439	U
115123	2019-03-03	0.387023	0.253757	0.229482	0.0962153	NC	4.14818	4.47698	3.99064	4.31944	U	0.306195	0.228193	-0.0226014	-0.100604	NC	4.06736	3.98935	4.20062	4.12262	U
115353	LRRC42	-0.174867	0.0256306	-0.152925	0.0475732	NC	-1.70555	-2.34249	-1.68361	-2.32055	D	-0.969256	-0.643856	-0.33232	-0.00691941	NC	-2.49994	-2.17454	-2.70044	-2.37504	D
115361	GBP4	-0.0430687	0.456858	0.307429	0.807355	NC	1.36649	2.24644	1.71699	2.59694	U	0.420513	0.314228	-0.459432	-0.565716	NC	1.83007	1.72379	1.33015	1.22386	U
115399	LRRC56	0.26039	-0.420332	0.52978	-0.150942	NC	1.68696	1.49221	1.95635	1.7616	U	0.0316553	-0.321313	0.226412	-0.126556	NC	1.45823	1.10526	2.13895	1.78598	U
115703	ARHGAP33	-0.387023	-0.280108	-0.206451	-0.0995357	NC	2.47325	1.71989	2.65382	1.90046	U	-0.556214	-1.05609	0.197146	-0.302735	NC	2.30406	1.80418	2.19715	1.69727	U
115811	IQCD	0.959358	-0.0824622	1.95936	0.917538	NC	3.66297	3.79586	4.66297	4.79586	U	-0.091423	-0.349074	-0.224317	-0.481969	NC	2.61218	2.35453	3.654	3.39635	U
115950	ZNF653	-0.0627358	-0.446064	0.263034	-0.120294	NC	-1.22367	-2.19704	-0.897902	-1.87127	D	-0.448274	-0.498027	0.525091	0.475338	NC	-1.60921	-1.65896	-1.22588	-1.27563	D
116225	ZMYND19	0.543538	0.137372	0.527771	0.121605	NC	-1.47939	-1.58136	-1.49515	-1.59713	D	-0.465472	0.0744024	-0.363495	0.17638	NC	-2.4884	-1.94852	-2.08223	-1.54236	D
116444	GRIN3B	-0.652077	0	-0.893085	-0.241008	NC	2.15528	2.52925	1.91427	2.28824	U	0.0291463	-0.405256	-0.344828	-0.779231	NC	2.8365	2.4021	2.18442	1.75002	U
116842	LEAP2	0.959358	0	0.959358	0	NC	2.39993	3.68806	2.39993	3.68806	U	0.715547	1.0522	-0.572579	-0.235929	NC	2.15612	2.49277	3.11548	3.45213	U
116969	ART5	NA	NA	NA	NA	NA	3.16993	5	3.16993	5	U	1.58496	1	-0.245112	-0.830075	NC	4.75489	4.16993	4.75489	4.16993	U
116988	AGAP3	-0.333754	-0.67381	-0.0775484	-0.417605	NC	-1.89706	-2.03217	-1.64085	-1.77596	D	-0.657228	-0.785772	-0.522122	-0.650666	NC	-2.22053	-2.34908	-1.88048	-2.00902	D
117143	TADA1	0.446726	0.752988	0.110226	0.416487	NC	-2.2042	-1.59968	-2.5407	-1.93618	D	0.415037	1.27215	-0.189478	0.66763	NC	-2.23589	-1.37878	-2.54215	-1.68504	D
117195	MRGPRX3	-0.229314	-0.354585	0.172785	0.0475135	NC	1.2814	1.49445	1.6835	1.89655	U	0.0560436	-0.0406706	-0.157009	-0.253723	NC	1.56675	1.47004	1.69203	1.59531	U
117581	TWIST2	-1.19174	-0.957951	-0.630243	-0.396454	NC	-2.42706	-2.32828	-1.86556	-1.76678	D	-0.168506	-0.855286	-0.267284	-0.954064	NC	-1.40382	-2.0906	-1.63761	-2.32439	D
118421	LINC00161	NA	NA	NA	NA	NA	4.70044	4.75489	4.70044	4.75489	U	0.0544478	-0.893085	0	-0.947533	NC	4.75489	3.80735	4.75489	3.80735	U
118426	LOH12CR1	0.452207	0.206451	0.0411387	-0.204618	NC	-1.16794	-1.53051	-1.57901	-1.94158	D	0.0351894	0.119582	0.39776	0.482152	NC	-1.58496	-1.50057	-1.33921	-1.25481	D
118433	RPL23AP7	-0.937785	0.0409816	-1.16157	-0.182807	NC	-1.66541	-1.24457	-1.8892	-1.46836	D	-0.873823	-0.334588	-1.29467	-0.755431	NC	-1.60145	-1.06222	-2.58022	-2.04098	D
118491	CFAP70	-0.142958	-0.236067	1.26303	1.16993	NC	1.62081	2.5482	3.0268	3.9542	U	0.841096	0.628552	-0.0862998	-0.298844	NC	2.60486	2.39232	2.69797	2.48543	U
119587	CPXM2	NA	NA	NA	NA	NA	4.80735	4.08746	4.80735	4.08746	U	1	0.0506261	1.71989	0.770518	NC	5.80735	4.85798	5.80735	4.85798	U
121053	C12orf45	-0.806922	-0.450892	-0.47318	-0.11715	NC	-1.7217	-1.34953	-1.38796	-1.01579	D	-0.298156	-0.191341	-0.670332	-0.563518	NC	-1.21294	-1.10612	-1.56897	-1.46215	D
121441	NEDD1	0.508055	1.0059	-0.175918	0.321928	NC	-1.48779	-2.02385	-2.17177	-2.70782	D	0.47592	1.04087	1.01197	1.57693	NC	-1.51993	-0.954976	-2.01777	-1.45282	D
121536	AEBP2	-0.192074	0.324324	-0.684904	-0.168506	NC	-1.55334	-2.004	-2.04617	-2.49683	D	-0.372659	0.352106	0.0780025	0.802768	NC	-1.73393	-1.00916	-2.25032	-1.52556	D
121642	ALKBH2	-0.238108	0.0144794	0.187071	0.439658	NC	-2.10434	-2.5629	-1.67916	-2.13772	D	-0.817384	-1.33942	-0.358821	-0.880853	NC	-2.68361	-3.20564	-2.9362	-3.45823	D
122786	FRMD6	-0.75373	-0.338693	-1.4325	-1.01746	NC	-2.77259	-2.53939	-3.45136	-3.21816	D	0.132894	-0.0384741	-0.100305	-0.271673	NC	-1.88596	-2.05733	-2.301	-2.47237	D
122876	GPHB5	NA	NA	NA	NA	NA	6.65821	6.67243	6.65821	6.67243	U	-0.957772	-1.10362	-0.971986	-1.11784	NC	5.70044	5.55459	5.70044	5.55459	U
122953	JDP2	-0.72522	-0.897584	-0.812914	-0.985278	NC	-1.19771	-2.21586	-1.2854	-2.30355	D	-1.1321	-1.01815	-0.113956	0	NC	-1.60459	-1.49064	-1.43223	-1.31827	D
122961	ISCA2	0.540201	0.940004	0.669209	1.06901	NC	-1.47197	-1.23222	-1.34297	-1.10321	D	1.04019	0.746714	0.800436	0.50696	NC	-0.971986	-1.26546	-1.37179	-1.66526	D
123745	PLA2G4E	0.777218	0.484982	0.799196	0.50696	NC	-2.17539	-1.93006	-2.15341	-1.90808	D	0.525091	0.587306	0.279759	0.341974	NC	-2.42752	-2.3653	-2.13528	-2.07306	D
124149	ANKRD26P1	NA	NA	NA	NA	NA	4.64386	5.08746	4.64386	5.08746	U	0.263034	0.565597	-0.180572	0.121991	NC	4.90689	5.20945	4.90689	5.20945	U
124739	USP43	1.10692	0.99444	0.499926	0.387452	NC	-1	-1.61298	-1.60699	-2.21997	D	0.547488	0.562595	1.16046	1.17557	NC	-1.55943	-1.54432	-1.44695	-1.43185	D
124801	LSM12	0.183337	0.246723	0.12415	0.187536	NC	-1.64691	-2.33951	-1.70609	-2.3987	D	0.0840005	0.0452334	0.776606	0.737839	NC	-1.74624	-1.78501	-1.80963	-1.8484	D
124925	SEZ6	NA	NA	NA	NA	NA	6.75489	6.37504	6.75489	6.37504	U	-0.800691	-0.73252	-0.420843	-0.352672	NC	5.9542	6.02237	5.9542	6.02237	U
124975	GGT6	-0.565951	-1	-0.113128	-0.547178	NC	0.816579	1.29698	1.2694	1.7498	U	0.316904	-0.454009	-0.163499	-0.934412	NC	1.69943	0.928521	2.13348	1.36257	U
124976	SPNS2	-0.403664	-0.560462	-0.244091	-0.400889	NC	-2.10299	-1.95195	-1.94342	-1.79238	D	-0.335258	-0.207193	-0.486296	-0.358231	NC	-2.03458	-1.90652	-1.87779	-1.74972	D
124997	WDR81	0.0293021	-0.486362	0.0800395	-0.435625	NC	-2.695	-2.60694	-2.64426	-2.5562	D	-0.104589	0.363691	-0.192645	0.275634	NC	-2.82889	-2.36061	-2.31322	-1.84494	D
125050	RN7SK	-0.623638	-0.051158	-0.256807	0.315673	NC	0.905773	2.52089	1.2726	2.88772	U	0.0265806	0.76647	-1.58853	-0.848646	NC	1.55599	2.29588	0.983512	1.7234	U
126129	CPT1C	1.12928	0.643856	0.544321	0.0588937	NC	2.90689	2.74147	2.32193	2.1565	U	-0.206451	-0.306978	-0.0410273	-0.141554	NC	1.57116	1.47063	2.05658	1.95606	U
126208	ZNF787	-0.0757116	-0.377956	0.11957	-0.182674	NC	-1.99328	-1.89421	-1.798	-1.69893	D	0.00581498	-0.515572	-0.0932545	-0.614642	NC	-1.91176	-2.43314	-1.60951	-2.1309	D
126248	WDR88	NA	NA	NA	NA	NA	5.72792	4.9542	5.72792	4.9542	U	-1.20436	0.10497	-0.430634	0.878694	NC	4.52356	5.83289	4.52356	5.83289	U
126308	MOB3A	0.232346	0.130095	0.489594	0.387343	NC	-1.56801	-1.51913	-1.31076	-1.26188	D	0.135817	-0.0497235	0.0869356	-0.098605	NC	-1.66454	-1.85008	-1.56229	-1.74783	D
126402	CCDC105	NA	NA	NA	NA	NA	2.80735	3	2.80735	3	U	1.09954	0	0.906891	-0.192645	NC	3.90689	2.80735	3.90689	2.80735	U
126526	C19orf47	0.315583	0.250924	0.340213	0.275554	NC	-1.45447	-1.77825	-1.42983	-1.75362	D	0.0367118	0.0439433	0.3605	0.367732	NC	-1.73334	-1.7261	-1.66868	-1.66145	D
126661	CCDC163P	-0.104427	-0.196247	-0.0153889	-0.10721	NC	1.23212	1.59333	1.32116	1.68237	U	0.70444	0.442345	0.343232	0.0811368	NC	2.04099	1.7789	2.13281	1.87072	U
126789	PUSL1	0.1276	0.0900584	0.426028	0.388487	NC	-2.1471	-1.25936	-1.84868	-0.96093	D	-0.243604	0.70732	-1.13135	-0.180425	NC	-2.51831	-1.56738	-2.48077	-1.52984	D
127281	FAM213B	-0.299125	-0.120909	-0.483437	-0.305221	NC	-2.02281	-2.08746	-2.20712	-2.27177	D	-0.596504	-1.20336	-0.531851	-1.13871	NC	-2.32019	-2.92704	-2.4984	-3.10526	D
127391	TMCO2	NA	NA	NA	NA	NA	4.16993	5.78136	4.16993	5.78136	U	0.0780025	0.917538	-1.53343	-0.693897	NC	4.24793	5.08746	4.24793	5.08746	U
127703	C1orf216	-0.0877585	0.259087	0.21654	0.563385	NC	-2.02385	-2.00474	-1.71955	-1.70044	D	0.341037	0.826464	0.321928	0.807355	NC	-1.59505	-1.10962	-1.9419	-1.45647	D
127829	ARL8A	-0.0375037	-0.132393	-0.0486455	-0.143535	NC	-1.41893	-2.08935	-1.43007	-2.1005	D	-0.422781	-0.611318	0.247645	0.0591082	NC	-1.80421	-1.99274	-1.70932	-1.89785	D
127845	GOLT1A	0.225292	1.34211	-1.16412	-0.0473057	NC	3.28904	3.39907	1.89963	2.00966	U	-0.580811	-0.219623	-0.690841	-0.329653	NC	2.48294	2.84413	1.36613	1.72732	U
128061	C1orf131	-0.409272	-0.0136027	-0.127268	0.268402	NC	-1.61285	-1.30792	-1.33084	-1.02591	D	-0.315318	-0.162903	-0.620251	-0.467836	NC	-1.51889	-1.36648	-1.91456	-1.76215	D
129401	NUP35	0.0578719	0.574284	-0.0703163	0.446095	NC	-2.07199	-1.71689	-2.20017	-1.84508	D	-0.578268	-0.381871	-0.933363	-0.736966	NC	-2.70813	-2.51173	-3.22454	-3.02814	D
129807	NEU4	NA	NA	NA	NA	NA	2.58496	4.24793	2.58496	4.24793	U	1.11548	0	-0.547488	-1.66297	NC	3.70044	2.58496	3.70044	2.58496	U
1302	COL11A2	0.378512	-0.514573	1.11548	0.222392	NC	1.63227	2.42403	2.36923	3.16099	U	0.64075	0.620713	-0.151008	-0.171046	NC	1.89451	1.87447	2.78759	2.76755	U
130752	MDH1B	-1.1375	0.628031	-1.76553	0	NC	2.39855	1.93289	1.77052	1.30485	U	-0.500429	-0.95109	-0.0347654	-0.485427	NC	3.03562	2.58496	1.27009	0.819428	U
131474	CHCHD4	0.56576	0.644298	-0.0467148	0.0318231	NC	-2.29409	-1.89265	-2.90656	-2.50513	D	0.887392	0.622227	0.485959	0.220794	NC	-1.97246	-2.23762	-2.05099	-2.31616	D
131540	ZDHHC19	NA	NA	NA	NA	NA	6.9542	7.97728	6.9542	7.97728	U	0.340424	-0.32484	-0.682659	-1.34792	NC	7.29462	6.62936	7.29462	6.62936	U
131583	FAM43A	-0.799406	-1.49985	-0.418501	-1.11894	NC	2.28969	2.0643	2.67059	2.44521	U	-0.937785	-0.913017	-0.7124	-0.687633	NC	2.15131	2.17608	2.85175	2.87652	U
1316	KLF6	0.0112475	-0.188461	-0.0279421	-0.227651	NC	-4.20773	-4.16018	-4.24692	-4.19937	D	-0.577349	-0.327026	-0.624901	-0.374578	NC	-4.79633	-4.54601	-4.59662	-4.3463	D
132241	RPL32P3	-0.560146	-0.313986	0.216811	0.462972	NC	0.680346	1.5743	1.4573	2.35126	U	0.333243	0.528985	-0.560715	-0.364974	NC	1.57374	1.76948	1.32757	1.52332	U
132946	ARL9	-0.447459	-1.04891	-0.471306	-1.07276	NC	2.73335	3.60288	2.70951	3.57904	U	-0.0218594	-0.645891	-0.89139	-1.51542	NC	3.15895	2.53492	3.7604	3.13637	U
133	ADM	0.346567	0.671093	0.226249	0.550774	NC	-1.49193	-1.50056	-1.61225	-1.62088	D	-0.893823	-0.5459	-0.885189	-0.537266	NC	-2.73232	-2.3844	-3.05684	-2.70892	D
134265	AFAP1L1	-0.979902	-0.803025	-1.3524	-1.17552	NC	-2.08025	-3.37793	-2.45275	-3.75043	D	-0.224432	-0.75336	1.07325	0.544321	NC	-1.32478	-1.85371	-1.50166	-2.03059	D
134430	WDR36	0.13251	0.25099	-0.541057	-0.422577	NC	-2.03118	-1.96948	-2.70474	-2.64305	D	0.140048	0.768827	0.0783556	0.707134	NC	-2.02364	-1.39486	-2.14212	-1.51334	D
1368	CPM	-0.12063	0.153545	0.221694	0.495869	NC	0.992264	1.30173	1.33459	1.64405	U	0.605499	0.215729	0.296035	-0.0937354	NC	1.71839	1.32862	1.44422	1.05445	U
1371	CPOX	0.166411	0.219381	0.0501235	0.103093	NC	-1.26514	-1.87886	-1.38143	-1.99515	D	-0.844205	-0.547488	-0.230484	0.0662337	NC	-2.27576	-1.97904	-2.32873	-2.03201	D
138151	NACC2	0.309998	-0.00637891	-0.0537504	-0.370127	NC	-1.23447	-1.67468	-1.59821	-2.03843	D	-0.274059	0.0442428	0.166157	0.484459	NC	-1.81852	-1.50022	-1.50215	-1.18384	D
138429	PIP5KL1	-0.620152	-1.37504	-0.289507	-1.04439	NC	1.86813	1.5137	2.19878	1.84435	U	-0.842295	-0.145142	-0.487864	0.209289	NC	1.64599	2.34314	2.40088	3.09803	U
138948	DBH-AS1	NA	NA	NA	NA	NA	6.78136	7.24793	6.78136	7.24793	U	-0.305626	-0.758992	-0.772194	-1.22556	NC	6.47573	6.02237	6.47573	6.02237	U
139285	AMER1	-0.37496	-0.774708	-1.15003	-1.54977	NC	-2.17247	-3.39486	-2.94753	-4.16993	D	-1.22239	-0.97728	0	0.245112	NC	-3.0199	-2.77479	-2.62015	-2.37504	D
139716	GAB3	0.171953	-0.39689	1.04947	0.480626	NC	-3.13386	-3.71882	-2.25634	-2.8413	D	0.830075	0	1.41504	0.584963	NC	-2.47573	-3.30581	-1.90689	-2.73697	D
140469	MYO3B	-1.16993	-1.58496	0.321928	-0.0931094	NC	0.736966	1.26303	2.22882	2.75489	U	0.163499	0.0565835	-0.36257	-0.469485	NC	2.07039	1.96347	2.48543	2.37851	U
140686	WFDC3	NA	NA	NA	NA	NA	3.70044	4.75489	3.70044	4.75489	U	1.05445	-0.115477	0	-1.16993	NC	4.75489	3.58496	4.75489	3.58496	U
140700	SAMD10	0.0679511	0.619338	0.354505	0.905892	NC	-2.37402	-1.92232	-2.08746	-1.63577	D	1.184	0.745427	0.732304	0.293731	NC	-1.25797	-1.69654	-1.80935	-2.24793	D
1408	CRY2	-0.443607	-0.272766	-0.548789	-0.377948	NC	2.19529	1.98323	2.09011	1.87805	U	-0.277935	-0.431901	-0.0658736	-0.219839	NC	2.36097	2.207	2.19013	2.03616	U
143379	C10orf82	NA	NA	NA	NA	NA	6.30378	6.53916	6.30378	6.53916	U	-0.237692	-1.09433	-0.47307	-1.32971	NC	6.06609	5.20945	6.06609	5.20945	U
1435	CSF1	1.04114	0.616412	0.405413	-0.0193135	NC	-2.11151	-0.874469	-2.74723	-1.51019	D	1.03814	-1.10692	-0.198904	-2.34395	NC	-2.11451	-4.25956	-1.68979	-3.83484	D
143678	C11orf94	NA	NA	NA	NA	NA	7.25739	6.2854	7.25739	6.2854	U	1.04182	-0.5025	2.01381	0.469485	NC	8.29921	6.75489	8.29921	6.75489	U
144132	DNHD1	-0.425306	-1.04679	0.415037	-0.206451	NC	1.3523	1.3065	2.19265	2.14684	U	0.914883	0.726105	0.960687	0.771908	NC	2.69249	2.50371	3.31398	3.1252	U
144233	BCDIN3D	0.375509	0.405256	0.237499	0.267247	NC	2.0111	1.94898	1.87309	1.81097	U	-0.0664563	0.0502448	-0.00433459	0.112367	NC	1.56913	1.68583	1.53938	1.65609	U
1443	CSH2	NA	NA	NA	NA	NA	4.08746	5.70044	4.08746	5.70044	U	0.866733	1.71989	-0.746243	0.106915	NC	4.9542	5.80735	4.9542	5.80735	U
144321	GLIPR1L2	-0.463174	-0.376058	0.105331	0.192447	NC	0.96487	1.90397	1.53337	2.47247	U	0.502983	0.100374	-0.436116	-0.838725	NC	1.93103	1.52842	1.84391	1.4413	U
144453	BEST3	-0.425306	0.376148	-1.21057	-0.409113	NC	2.26559	1.53287	1.48033	0.747613	U	0.104634	-0.581774	0.83735	0.150942	NC	2.79553	2.10912	1.99408	1.30767	U
1445	CSK	-0.280271	-0.256879	-0.0308793	-0.00748746	NC	-1.98862	-2.16309	-1.73923	-1.9137	D	-0.40863	-0.319663	-0.234164	-0.145198	NC	-2.11698	-2.02801	-2.14037	-2.05141	D
144699	FBXL14	0.308122	0.162271	0.155089	0.00923821	NC	-1.23043	-1.68082	-1.38346	-1.83386	D	-0.650926	-0.143966	-0.200533	0.306427	NC	-2.18948	-1.68252	-2.04363	-1.53667	D
145483	FAM161B	0.197446	-0.346176	0.568284	0.0246621	NC	0.858644	1.43652	1.22948	1.80735	U	0.739086	0.549162	0.161213	-0.0287113	NC	1.40028	1.21036	1.94391	1.75398	U
1457	CSNK2A1	0.293023	0.403496	0.0804737	0.190947	NC	-1.51903	-1.94568	-1.73158	-2.15822	D	0.0519409	0.366322	0.478585	0.792966	NC	-1.76011	-1.44573	-1.87059	-1.55621	D
145781	GCOM1	NA	NA	NA	NA	NA	3.45943	5.04439	3.45943	5.04439	U	-0.137504	0.628031	-1.72247	-0.956931	NC	3.32193	4.08746	3.32193	4.08746	U
145788	C15orf65	0.368596	0.646226	0.286958	0.564587	NC	-1.76356	-2.0813	-1.8452	-2.16294	D	-0.698344	-0.426265	-0.380604	-0.108524	NC	-2.8305	-2.55842	-3.10813	-2.83605	D
146330	FBXL16	-0.0922937	-0.337175	-0.207321	-0.452202	NC	-1.60857	-2.58763	-1.7236	-2.70265	D	-1.00162	-0.449526	-0.0225678	0.52953	NC	-2.5179	-1.9658	-2.27302	-1.72092	D
146434	ZNF597	-0.313158	-0.450661	-0.955606	-1.09311	NC	2.81237	2.00439	2.16993	1.36194	U	-0.365794	-0.38529	0.442187	0.422691	NC	2.75974	2.74024	2.89724	2.87774	U
1466	CSRP2	0.586389	0.858424	0.778422	1.05046	NC	3.54334	3.8277	3.73538	4.01973	U	-0.109035	-0.161459	-0.393392	-0.445815	NC	2.84792	2.79549	2.57588	2.52346	U
146691	TOM1L2	0.0213737	0.205374	-0.265684	-0.0816838	NC	1.68713	1.57054	1.40007	1.28348	U	0.00333957	0.0460649	0.119932	0.162657	NC	1.66909	1.71182	1.48509	1.52782	U
146760	RTN4RL1	-0.708537	-1.45138	-0.0687128	-0.811555	NC	-4.25873	-5.06609	-3.61891	-4.42626	D	-0.807355	0.514573	0	1.32193	NC	-4.35755	-3.03562	-3.61471	-2.29278	D
148022	TICAM1	-0.408885	-0.471959	-0.470113	-0.533187	NC	-1.66065	-2.58642	-1.72188	-2.64765	D	-0.658356	-0.971808	0.267413	-0.0460395	NC	-1.91013	-2.22358	-1.84705	-2.1605	D
148229	ATP8B3	0.0588937	-0.584963	1.8365	1.19265	NC	2.68182	2.35755	4.45943	4.13516	U	0	-0.211504	0.324272	0.112768	NC	2.62293	2.41143	3.26679	3.05528	U
148345	C1orf127	NA	NA	NA	NA	NA	4.24793	6.32193	4.24793	6.32193	U	2	1.03747	-0.0740006	-1.03653	NC	6.24793	5.2854	6.24793	5.2854	U
148523	CIART	-0.690935	-0.239523	-1.04865	-0.597241	NC	-2.11775	-1.97702	-2.47547	-2.33474	D	0.203689	-0.68281	0.062964	-0.823535	NC	-1.22313	-2.10962	-1.67454	-2.56104	D
1488	CTBP2	0.458191	0.689039	0.296975	0.527824	NC	-1.63097	-2.23235	-1.79218	-2.39357	D	-0.176544	-0.0638248	0.424841	0.53756	NC	-2.2657	-2.15298	-2.49655	-2.38383	D
1491	CTH	1.11189	0.438121	-0.273761	-0.947533	NC	3.62323	3.12262	2.23758	1.73697	U	-0.117997	0.022484	0.382616	0.523097	NC	2.39334	2.53382	3.06711	3.2076	U
150	ADRA2A	NA	NA	NA	NA	NA	8.20457	8.17493	8.20457	8.17493	U	0.330704	-0.0856301	0.36035	-0.0559846	NC	8.53528	8.11894	8.53528	8.11894	U
150223	YDJC	-0.748578	-0.466819	-0.643238	-0.361478	NC	-1.7986	-1.49777	-1.69326	-1.39243	D	-0.527932	-0.476438	-0.828764	-0.77727	NC	-1.57796	-1.52646	-1.85972	-1.80822	D
1503	CTPS1	0.077498	0.00368129	0.186172	0.112355	NC	-1.62609	-1.2392	-1.51741	-1.13053	D	-0.118514	0.306371	-0.505404	-0.0805184	NC	-1.8221	-1.39722	-1.74828	-1.3234	D
150726	FBXO41	-0.053242	-0.584963	-0.354109	-0.885829	NC	-1.08616	-2.20163	-1.38702	-2.5025	D	-1.11548	-0.530515	0	0.584963	NC	-2.14839	-1.56343	-1.61667	-1.03171	D
151234	SULT1C2P1	0.76184	0.120294	1.47805	0.836501	NC	2.27085	2.0156	2.98706	2.7318	U	-0.194503	0.216811	0.060754	0.472068	NC	1.31451	1.72583	1.95606	2.36737	U
151306	GPBAR1	-0.188445	-0.527247	-0.188445	-0.527247	NC	2.74284	2.95134	2.74284	2.95134	U	-0.569649	-0.973848	-0.778151	-1.18235	NC	2.36164	1.95744	2.70044	2.29624	U
1515	CTSV	0.105709	0.0415791	0.768674	0.704544	NC	1.11353	1.61557	1.77649	2.27854	U	0.249978	0.342063	-0.252063	-0.159979	NC	1.2578	1.34988	1.32193	1.41401	U
151888	BTLA	NA	NA	NA	NA	NA	5.24793	5.61471	5.24793	5.61471	U	0.881356	1.19502	0.514573	0.828234	NC	6.12928	6.44294	6.12928	6.44294	U
151903	CCDC12	-0.457825	-0.273577	0.162675	0.346922	NC	-2.56791	-1.73447	-1.94741	-1.11397	D	0.130554	0.390197	-0.702894	-0.44325	NC	-1.97954	-1.71989	-2.16378	-1.90414	D
152118	C3orf79	NA	NA	NA	NA	NA	4.52356	6.12928	4.52356	6.12928	U	2.62619	0.902703	1.02046	-0.703018	NC	7.14975	5.42626	7.14975	5.42626	U
152302	CIDECP	-0.504163	-0.360672	-0.185556	-0.0420641	NC	1.14834	1.44546	1.46695	1.76407	U	-0.295183	-0.241008	-0.592304	-0.538129	NC	1.35732	1.4115	1.21383	1.26801	U
152559	PAQR3	-0.157622	0.199987	-0.48375	-0.126141	NC	-2.08221	-2.12744	-2.40834	-2.45357	D	-0.306427	0.486698	-0.261198	0.531928	NC	-2.23102	-1.43789	-2.58863	-1.7955	D
152756	FAM218A	-0.523562	0.283793	-0.807355	0	NC	2.80735	2.07635	2.52356	1.79256	U	-0.807355	-0.523562	-0.0763509	0.207442	NC	2.52356	2.80735	1.71621	2	U
153020	RASGEF1B	0.415037	-1.16993	0.584963	-1	NC	3.13386	2.5025	3.30378	2.67243	U	0.250808	0.638734	0.882164	1.27009	NC	2.96963	3.35755	4.55459	4.94251	U
153129	SLC38A9	-0.152875	0.162939	-0.187733	0.12808	NC	-1.70338	-1.29474	-1.73824	-1.3296	D	0.319372	0.277853	-0.0892673	-0.130787	NC	-1.23114	-1.27266	-1.54695	-1.58847	D
153733	CCDC112	-0.0626968	0.00175191	0.128196	0.192645	NC	-2.73055	-1.67912	-2.53966	-1.48823	D	1.15433	0.970616	0.1029	-0.080812	NC	-1.51353	-1.69724	-1.57798	-1.76169	D
153830	RNF145	0.20795	0.133579	0.143195	0.0688239	NC	-1.41816	-1.49181	-1.48292	-1.55657	D	-0.261032	0.412531	-0.187383	0.48618	NC	-1.88715	-1.21358	-1.81278	-1.13921	D
153910	LOC153910	NA	NA	NA	NA	NA	2.58496	4.08746	2.58496	4.08746	U	1.58496	0.874469	0.0824622	-0.628031	NC	4.16993	3.45943	4.16993	3.45943	U
154197	PNLDC1	NA	NA	NA	NA	NA	5.61471	5.16993	5.61471	5.16993	U	0.21818	-0.0911479	0.662965	0.353637	NC	5.83289	5.52356	5.83289	5.52356	U
154810	AMOTL1	-0.286881	-0.695521	-0.741575	-1.15021	NC	-2.13719	-2.70834	-2.59188	-3.16304	D	-0.0710831	-0.36059	0.500074	0.210567	NC	-1.92139	-2.2109	-1.51275	-1.80226	D
154860	FEZF1-AS1	NA	NA	NA	NA	NA	6.61471	6	6.61471	6	U	-0.485427	-1.25716	0.129283	-0.642448	NC	6.12928	5.35755	6.12928	5.35755	U
155054	ZNF425	-0.135352	-0.481127	-0.023459	-0.369234	NC	2.81655	2.80428	2.92845	2.91617	U	-0.305214	-0.477502	-0.292936	-0.465223	NC	2.64669	2.4744	2.99247	2.82018	U
1559	CYP2C9	NA	NA	NA	NA	NA	6.96578	8.09276	6.96578	8.09276	U	0.391768	-0.132894	-0.735205	-1.25987	NC	7.35755	6.83289	7.35755	6.83289	U
1565	CYP2D6	-0.510962	0.0740006	-0.678072	-0.0931094	NC	2.6749	1.92866	2.50779	1.76155	U	-1.11548	-0.992095	-0.369234	-0.245851	NC	2.07039	2.19377	1.48543	1.60881	U
157739	TDH	NA	NA	NA	NA	NA	3.32193	5.2854	3.32193	5.2854	U	1	1.43296	-0.963474	-0.530515	NC	4.32193	4.75489	4.32193	4.75489	U
158056	MAMDC4	0.765535	0.169925	1.18057	0.584963	NC	1.74416	1.32193	2.1592	1.73697	U	0.33479	0.181838	0.757023	0.604071	NC	1.31342	1.16046	1.90903	1.75607	U
158158	RASEF	0.448358	0.367057	0.0400774	-0.0412227	NC	2.06589	1.35129	1.65761	0.94301	U	0	-0.0591621	0.714598	0.655436	NC	1.61753	1.55837	1.69883	1.63967	U
1594	CYP27B1	-0.199938	-0.366212	-0.392111	-0.558385	NC	-1.45261	-1.67845	-1.64478	-1.87062	D	-0.395385	-0.271836	-0.169548	-0.0459984	NC	-1.64806	-1.52451	-1.48179	-1.35824	D
162394	SLFN5	1.03411	1.13184	0.0444995	0.142236	NC	3.34725	2.10482	2.35764	1.11521	U	-0.259376	0.546702	0.983051	1.78913	NC	2.05376	2.85984	1.95602	2.7621	U
162514	TRPV3	-1	-2	1	NA	NC	6.11374	6.2854	8.11374	8.2854	U	-0.231099	-0.506412	-0.402759	-0.678072	NC	6.88264	6.60733	7.88264	7.60733	U
163049	ZNF791	0.169486	0.150025	0.0646896	0.0452293	NC	1.55501	1.39814	1.45021	1.29334	U	-0.0223678	-0.176498	0.134501	-0.0196288	NC	1.36316	1.20903	1.38262	1.22849	U
163589	TDRD5	-0.0184569	-0.13445	0.356392	0.240398	NC	-1.59724	-2.02466	-1.22239	-1.64981	D	-0.557482	-0.308122	-0.130061	0.119299	NC	-2.13627	-1.88691	-2.02027	-1.77091	D
164118	TTC24	NA	NA	NA	NA	NA	5.49185	6.42626	5.49185	6.42626	U	0.236067	0.574236	-0.698344	-0.360176	NC	5.72792	6.06609	5.72792	6.06609	U
165082	ADGRF3	0.736966	1	0.321928	0.584963	NC	4.05889	4.87447	3.64386	4.45943	U	0.214125	0.505891	-0.601451	-0.309684	NC	3.53605	3.82782	3.27302	3.56478	U
165215	FAM171B	0.392317	-0.678072	-0.192645	-1.26303	NC	2.98868	1.75489	2.40372	1.16993	U	-0.470359	-0.654784	0.763438	0.579013	NC	2.12601	1.94158	3.1964	3.01197	U
1662	DDX10	-0.3428	-0.195464	-0.147336	0	NC	-2.26053	-2.31077	-2.06506	-2.11531	D	-0.153913	-0.123191	-0.10367	-0.072948	NC	-2.07164	-2.04092	-2.21898	-2.18825	D
166614	DCLK2	0.234465	-0.117836	0.514573	0.162271	NC	-2.08746	-1.76553	-1.80735	-1.48543	D	0.321928	1.11548	0	0.793549	NC	-2	-1.20645	-1.6477	-0.854149	D
167410	LIX1	0	0	0.793549	0.793549	NC	1.95777	1.7425	2.75132	2.53605	U	-0.19878	-0.570749	0.0164881	-0.355481	NC	1.75899	1.38702	1.75899	1.38702	U
169200	TMEM64	-0.253757	0.177832	-0.488067	-0.056478	NC	-2.48605	-1.65163	-2.72036	-1.88594	D	-0.108253	0.955877	-0.942667	0.121464	NC	-2.34054	-1.27641	-2.77213	-1.708	D
169270	ZNF596	1.35755	0.72792	0.0721498	-0.557482	NC	3.77149	3.55075	2.48609	2.26534	U	-0.523562	-0.596564	-0.302819	-0.375821	NC	1.89038	1.81737	2.52001	2.44701	U
170392	OIT3	NA	NA	NA	NA	NA	4.70044	5.90689	4.70044	5.90689	U	1.63941	0.823122	0.432959	-0.383329	NC	6.33985	5.52356	6.33985	5.52356	U
170394	PWWP2B	0.530515	0.0395284	0.557482	0.0664954	NC	-2.6845	-3.75489	-2.65753	-3.72792	D	-1.07039	-1	0	0.0703893	NC	-4.2854	-4.21501	-3.79442	-3.72403	D
170961	ANKRD24	0.222392	-0.584963	0.485427	-0.321928	NC	1.66297	2.11548	1.926	2.37851	U	1	0.211504	0.547488	-0.241008	NC	2.44057	1.65208	3.24793	2.45943	U
171220	DSTNP2	0.664297	0.316857	0.300789	-0.0466501	NC	3.66097	4.33912	3.29746	3.97561	U	0.679405	0.359454	0.00124999	-0.318701	NC	3.67607	3.35612	4.02351	3.70356	U
171391	LOC171391	0.272766	-0.0906704	0.828729	0.465292	NC	0.881774	1.34949	1.43774	1.90545	U	0.762961	0.758269	0.295243	0.290551	NC	1.37197	1.36728	1.73541	1.73071	U
171586	ABHD3	0.283533	0.745683	-0.705496	-0.243346	NC	2.37907	2.51403	1.39004	1.525	U	-0.548997	-0.27711	-0.683952	-0.412064	NC	1.54654	1.81843	1.08439	1.35628	U
1736	DKC1	-0.530545	-0.423489	-0.301522	-0.194467	NC	-2.33339	-1.59068	-2.10437	-1.36166	D	0.0391951	0.258918	-0.703513	-0.48379	NC	-1.76365	-1.54393	-1.87071	-1.65098	D
1739	DLG1	-0.317725	-0.160093	-0.853814	-0.696183	NC	-1.60403	-2.60723	-2.14012	-3.14332	D	-0.399131	0.0285064	0.604071	1.03171	NC	-1.68544	-1.2578	-1.84307	-1.41543	D
1775	DNASE1L2	1	0	-0.353637	-1.35364	NC	2.11548	2.8413	0.76184	1.48767	U	-0.378512	0.495957	-1.10434	-0.229868	NC	0.736966	1.61143	1.73697	2.61143	U
1791	DNTT	NA	NA	NA	NA	NA	3.70044	4.64386	3.70044	4.64386	U	1	1.20645	0.0565835	0.263034	NC	4.70044	4.90689	4.70044	4.90689	U
18	ABAT	0.180572	0.0931094	0.765535	0.678072	NC	3.08179	2.41504	3.66676	3	U	-0.0403175	-0.168506	0.626439	0.498251	NC	2.8609	2.73272	2.94837	2.82018	U
1824	DSC2	0.365396	0.376879	-0.219566	-0.208084	NC	-0.702032	-1.4264	-1.28699	-2.01136	D	-0.619896	-0.252032	0.104469	0.472334	NC	-1.68732	-1.31946	-1.69881	-1.33094	D
1839	HBEGF	-0.873088	-1.38766	-0.291231	-0.805804	NC	3.20912	2.8371	3.79097	3.41896	U	-0.664619	-0.886567	-0.292604	-0.514552	NC	3.41759	3.19564	3.93216	3.71021	U
1843	DUSP1	0.218855	0.163939	0.114316	0.0594004	NC	-3.73696	-4.05457	-3.8415	-4.1591	D	-0.900777	-0.20573	-0.583167	0.111879	NC	-4.85659	-4.16154	-4.80167	-4.10663	D
1845	DUSP3	0.375764	0.331075	0.182354	0.137666	NC	-2.1998	-2.4005	-2.39321	-2.59391	D	0.833876	0.799303	1.03457	1	NC	-1.74169	-1.77626	-1.697	-1.73157	D
1846	DUSP4	0.1012	0.0962009	0.0277127	0.0227135	NC	-1.65488	-1.74322	-1.72837	-1.81671	D	-0.295137	-0.231081	-0.206796	-0.14274	NC	-2.05122	-1.98716	-2.04622	-1.98217	D
1847	DUSP5	-0.981527	-0.802251	-1.29749	-1.11822	NC	1.9986	1.58186	1.68264	1.26589	U	-0.718169	-0.656003	-0.301425	-0.239259	NC	2.26196	2.32413	2.08269	2.14485	U
1849	DUSP7	-0.0952937	-0.156442	-0.168057	-0.229205	NC	-2.84957	-3.82911	-2.92233	-3.90187	D	-0.623075	-1.2713	0.356461	-0.291766	NC	-3.37735	-4.02558	-3.3162	-3.96443	D
1855	DVL1	0.552928	-0.0017944	0.49192	-0.0628026	NC	-1.2341	-2.0117	-1.2951	-2.07271	D	-0.239188	0.169925	0.53842	0.947533	NC	-2.02621	-1.6171	-1.47149	-1.06238	D
1874	E2F4	0.280148	0.192116	0.393807	0.305775	NC	-1.55351	-1.52968	-1.43986	-1.41602	D	0.173392	0.132324	0.149558	0.10849	NC	-1.66027	-1.70134	-1.57224	-1.61331	D
192134	B3GNT6	-1.31159	-0.533979	-0.215013	0.562595	NC	1.56756	1.69163	2.66413	2.7882	U	0.174586	-0.452881	0.0505153	-0.576952	NC	3.05373	2.42626	2.27612	1.64866	U
1942	EFNA1	-0.421249	-0.65778	-0.0815924	-0.318124	NC	-4.46458	-4.17827	-4.12492	-3.83862	D	0.851901	1.17816	0.565597	0.891851	NC	-3.19143	-2.86517	-2.95489	-2.62864	D
196385	DNAH10	0	-1	0	-1	NC	4.61471	4.32193	4.61471	4.32193	U	0.493815	0.0857299	0.786596	0.378512	NC	5.10852	4.70044	6.10852	5.70044	U
196528	ARID2	0.151084	0.186506	-0.502663	-0.467241	NC	-2.00922	-2.22137	-2.66297	-2.87512	D	0.613451	0.699491	0.825604	0.911644	NC	-1.54685	-1.46081	-1.58227	-1.49623	D
1969	EPHA2	1.12278	0.784345	0.918514	0.580081	NC	2.23747	1.56833	2.0332	1.36406	U	0.369109	0.261682	1.03825	0.930823	NC	1.4838	1.37637	1.82223	1.7148	U
1977	EIF4E	0.0167525	0.335028	-0.074952	0.243323	NC	-1.76505	-1.70627	-1.85676	-1.79797	D	0.327916	0.603928	0.269131	0.545143	NC	-1.45389	-1.17788	-1.77217	-1.49615	D
199223	TTC21A	0.584963	-0.234465	0.321928	-0.4975	NC	2.23266	1.58496	1.96963	1.32193	U	-1.03103	-0.250808	-0.383329	0.39689	NC	0.616671	1.39689	1.4361	2.21632	U
2000	ELF4	-0.342392	-0.349279	-0.516375	-0.523262	NC	-1.91965	-3.11412	-2.09363	-3.28811	D	-0.879603	-1.2301	0.314873	-0.0356239	NC	-2.45686	-2.80735	-2.44997	-2.80047	D
200035	NUDT17	-0.491327	-0.361369	-0.288431	-0.158473	NC	1.58216	1.87943	1.78505	2.08233	U	-0.182446	-0.140034	-0.479722	-0.43731	NC	1.89104	1.93345	1.76108	1.80349	U
200424	TET3	-0.274107	-0.603955	-0.846436	-1.17628	NC	-0.918183	-1.92368	-1.49051	-2.49601	D	-0.735138	-0.889172	0.270358	0.116324	NC	-1.37921	-1.53325	-1.04937	-1.2034	D
201292	TRIM65	-0.00945148	-0.145736	-0.0777886	-0.214073	NC	-1.74868	-1.25231	-1.81701	-1.32065	D	0.248641	0.166403	-0.247727	-0.329965	NC	-1.49058	-1.57282	-1.3543	-1.43654	D
201725	C4orf46	0.339416	0.130288	0.181268	-0.0278598	NC	-2.5502	-2.31316	-2.70834	-2.47131	D	0.762501	0.850857	0.525461	0.613817	NC	-2.12711	-2.03876	-1.91798	-1.82963	D
202299	LINC01554	0.986579	1.40498	-0.26976	0.148644	NC	2.558	2.64599	1.30166	1.38965	U	0.849508	-0.118126	0.761512	-0.206123	NC	2.42092	1.45329	2.00252	1.03489	U
203260	CCDC107	0.481972	0.58651	0.586959	0.691497	NC	-1.90387	-1.37443	-1.79889	-1.26944	D	0.925084	0.800884	0.39564	0.27144	NC	-1.46076	-1.58496	-1.5653	-1.6895	D
203522	DDX26B	-0.38109	-0.719892	-0.464506	-0.803308	NC	3.82443	3.67646	3.74101	3.59304	U	-0.682443	-0.875783	-0.534475	-0.727816	NC	3.52308	3.32974	3.86188	3.66854	U
203523	ZNF449	0.36257	-0.14439	-0.152003	-0.658963	NC	-1.74846	-2.14439	-2.26303	-2.65896	D	0.641546	-0.0588937	1.03747	0.337035	NC	-1.46949	-2.16993	-0.962525	-1.66297	D
204010	RPSAP52	-0.147976	0.0621565	0.0880913	0.298224	NC	-2.10343	-2.95533	-1.86736	-2.71926	D	0.545434	0.0573332	1.39734	0.909235	NC	-1.41002	-1.89812	-1.62015	-2.10825	D
205	AK4	0.321352	0.374889	-0.0871917	-0.0336547	NC	-0.85319	-1.49293	-1.26173	-1.90148	D	-0.597152	-0.594531	0.0425919	0.0452126	NC	-1.77169	-1.76907	-1.82523	-1.82261	D
2050	EPHB4	0.404627	0.200195	0.318649	0.114217	NC	-2.54133	-2.52188	-2.62731	-2.60786	D	0.234465	0.142835	0.215013	0.123382	NC	-2.71149	-2.80313	-2.50706	-2.59869	D
2052	EPHX1	-0.966286	-1.2435	-0.854853	-1.13207	NC	1.90907	1.83683	2.02051	1.94826	U	-0.951724	-1.18676	-0.879481	-1.11452	NC	1.92364	1.6886	2.20085	1.96581	U
2059	EPS8	0.152506	0.36257	-0.0706047	0.13946	NC	1.68684	1.30677	1.46373	1.08366	U	0.108253	0.0108883	0.488327	0.390962	NC	1.64259	1.54522	1.43252	1.33516	U
2063	NR2F6	0.179615	-0.0174943	0.383199	0.18609	NC	-1.88263	-2.53751	-1.67904	-2.33393	D	-0.147987	-0.11962	0.5069	0.535267	NC	-2.21023	-2.18186	-2.01312	-1.98475	D
206358	SLC36A1	-0.156869	-0.0443941	-0.782068	-0.669594	NC	-0.624855	-1.79647	-1.25005	-2.42167	D	-0.908577	-0.675378	0.263034	0.496234	NC	-1.37656	-1.14336	-1.48904	-1.25584	D
2069	EREG	-0.10298	-0.170566	0.00772382	-0.0598621	NC	-1.45943	-2.12851	-1.34873	-2.01781	D	-0.761595	-0.687117	-0.0925121	-0.0180339	NC	-2.11805	-2.04357	-2.05046	-1.97598	D
2119	ETV5	1.22239	1.06289	0.540754	0.381249	NC	2.70738	2.3352	2.02574	1.65356	U	-0.156953	0.0181109	0.215231	0.390294	NC	1.32804	1.5031	1.48754	1.66261	U
215	ABCD1	-0.0713846	-0.285091	-0.0412227	-0.254929	NC	2.79307	2.18203	2.82323	2.2122	U	-0.320135	-0.734575	0.290901	-0.123539	NC	2.54432	2.12988	2.75803	2.34359	U
2152	F3	-0.567062	-0.407802	-0.783319	-0.624058	NC	-5.12976	-4.55384	-5.34602	-4.77009	D	0.898717	0.561173	0.322791	-0.0147525	NC	-3.66398	-4.00153	-3.82324	-4.16079	D
2165	F13B	NA	NA	NA	NA	NA	5.72792	3.58496	5.72792	3.58496	U	-1.14296	-0.920566	1	1.22239	NC	4.58496	4.80735	4.58496	4.80735	U
2169	FABP2	0.125531	-1	1.12553	0	NC	1.73039	2.19878	2.73039	3.19878	U	0.269607	0.202493	-0.19878	-0.265894	NC	1.87447	1.80735	3	2.93289	U
219	ALDH1B1	-0.764107	-0.765059	-0.770535	-0.771486	NC	-2.72331	-2.50568	-2.72973	-2.51211	D	-0.0642985	-0.236643	-0.281927	-0.454271	NC	-2.0235	-2.19584	-2.02255	-2.19489	D
2193	FARSA	0.0624778	-0.0640385	0.111248	-0.0152682	NC	-1.64226	-1.75549	-1.59349	-1.70672	D	0.0150587	-0.127405	0.128295	-0.0141688	NC	-1.68968	-1.83214	-1.56316	-1.70562	D
219654	ZCCHC24	-0.0310269	-0.306661	-0.743225	-1.01886	NC	4.99616	4.32499	4.28396	3.6128	U	-0.795859	-0.593645	-0.124696	0.0775188	NC	4.23133	4.43354	4.50696	4.70917	U
219988	PATL1	0.450774	0.57139	0.14937	0.269986	NC	-1.4502	-2.2251	-1.7516	-2.5265	D	0.462879	0.0374747	1.23778	0.812373	NC	-1.43809	-1.8635	-1.55871	-1.98411	D
220001	VWCE	-0.226771	-0.137504	0.600393	0.68966	NC	2.7578	3.23545	3.58496	4.06261	U	0.409208	-0.117094	-0.0684411	-0.594744	NC	3.39378	2.86748	3.30451	2.77821	U
220136	CFAP53	0.5542	0.188072	0.536053	0.169925	NC	3.20203	4.06035	3.18388	4.04221	U	0.45419	0.550826	-0.404133	-0.307497	NC	3.10202	3.19866	3.46815	3.56478	U
220164	DOK6	0	-0.584963	1.58496	1	NC	2.11548	2.22239	3.70044	3.80735	U	-0.115477	-1.11548	-0.222392	-1.22239	NC	2	1	2.58496	1.58496	U
220388	CCDC89	NA	NA	NA	NA	NA	4.39232	3.45943	4.39232	3.45943	U	0.0671142	-0.485427	1	0.447459	NC	4.45943	3.90689	4.45943	3.90689	U
2209	FCGR1A	NA	NA	NA	NA	NA	8.07682	6.9542	8.07682	6.9542	U	-0.342106	-1.55325	0.780513	-0.430634	NC	7.73471	6.52356	7.73471	6.52356	U
2210	FCGR1B	NA	NA	NA	NA	NA	7.99435	7.74819	7.99435	7.74819	U	0.295665	0.253574	0.541826	0.499735	NC	8.29002	8.24793	8.29002	8.24793	U
221061	FAM171A1	0.438759	0.227849	0.202764	-0.00814624	NC	-1.27302	-1.61005	-1.50901	-1.84605	D	-0.571157	-0.504043	-0.234122	-0.167008	NC	-2.28293	-2.21582	-2.07202	-2.00491	D
221400	TDRD6	-0.415037	-0.415037	-0.736966	-0.736966	NC	3.04439	2.32193	2.72247	2	U	-0.137504	-1.04439	0.584963	-0.321928	NC	3.32193	2.41504	3.32193	2.41504	U
221442	ADCY10P1	0.211504	1.58496	-0.447459	0.925999	NC	3.37412	3.53343	2.71516	2.87447	U	0.33795	0.152735	0.178642	-0.00657265	NC	3.50057	3.31536	2.12711	1.9419	U
221545	C6orf136	0.431667	0.365185	0.614251	0.547769	NC	-3.41033	-2.98035	-3.22775	-2.79776	D	0.239466	0.169925	-0.190522	-0.260063	NC	-3.60254	-3.67208	-3.53605	-3.60559	D
221895	JAZF1	-0.319399	-0.353918	-0.506211	-0.54073	NC	-2.82569	-3.39993	-3.01251	-3.58674	D	-0.856636	-0.606658	-0.2824	-0.0324215	NC	-3.36293	-3.11295	-3.32841	-3.07843	D
222389	BEND7	0.402669	-0.0501235	0.255601	-0.197192	NC	-1.50956	-2.32193	-1.65662	-2.469	D	-0.36257	-0.4975	0.449803	0.314873	NC	-2.27479	-2.40972	-1.822	-1.95693	D
222584	FAM83B	0.641362	0.597688	0.178014	0.13434	NC	-1.49215	-1.62629	-1.9555	-2.08964	D	0.438442	0.684798	0.572579	0.818934	NC	-1.69507	-1.44872	-1.6514	-1.40504	D
2247	FGF2	0.279654	0.118441	-0.300156	-0.461369	NC	-2.84645	-2.61616	-3.42626	-3.19597	D	0.584963	0.928917	0.354665	0.698619	NC	-2.54115	-2.19719	-2.37993	-2.03598	D
2264	FGFR4	-0.25952	-0.426815	0.989508	0.822213	NC	0.642448	1.31487	1.89148	2.5639	U	0.636625	0.366322	-0.0358007	-0.306103	NC	1.53859	1.26829	1.70589	1.43558	U
22838	RNF44	-0.380387	-0.795794	-0.585702	-1.00111	NC	-1.47313	-2.39264	-1.67844	-2.59795	D	-0.868961	-0.843274	0.0505489	0.0762356	NC	-1.9617	-1.93601	-1.54629	-1.52061	D
22911	WDR47	0.436592	0.577389	-0.0760919	0.0647057	NC	2.1632	1.87584	1.65051	1.36316	U	-0.19373	0	0.0936238	0.287353	NC	1.53287	1.7266	1.39208	1.58581	U
22931	RAB18	0.118441	0.397085	-0.0928873	0.185757	NC	-1.35214	-1.87094	-1.56347	-2.08227	D	-0.302973	-0.172389	0.215827	0.346411	NC	-1.77355	-1.64297	-2.0522	-1.92161	D
2295	FOXF2	0.313824	0.191962	0.0428025	-0.0790588	NC	-4.48477	-4.78245	-4.75579	-5.05347	D	-1.29768	-0.597241	-1	-0.29956	NC	-6.09628	-5.39584	-5.97441	-5.27397	D
22954	TRIM32	-0.0561431	0.392842	-0.148564	0.300421	NC	-2.66419	-3.81103	-2.75661	-3.90345	D	0.569366	-0.172837	1.71621	0.974005	NC	-2.03868	-2.78088	-2.48767	-3.22987	D
22976	PAXIP1	0.230274	0.312535	0.00484533	0.0871059	NC	-2.94571	-3.31768	-3.17114	-3.54311	D	0.782154	0.769387	1.15412	1.14136	NC	-2.39383	-2.4066	-2.47609	-2.48886	D
2298	FOXD4	-0.658963	-0.0655883	0.788496	1.38187	NC	-2.6845	-1.26303	-1.23704	0.184425	D	1.34239	0.550197	-0.0790716	-0.871267	NC	-0.683143	-1.47534	-1.27652	-2.06871	D
230	ALDOC	0.666444	0.35766	1.31915	1.01037	NC	2.47578	2.66018	3.12849	3.31288	U	-0.156504	0.162592	-0.340897	-0.0218008	NC	1.65283	1.97193	1.96162	2.28072	U
23047	PDS5B	0.735949	0.393285	0.267311	-0.0753537	NC	-1.39486	-1.7068	-1.8635	-2.17544	D	-0.0134205	0.321928	0.298523	0.633872	NC	-2.14423	-1.80888	-1.80156	-1.46622	D
23076	RRP1B	-0.0805284	-0.175221	-0.263678	-0.358371	NC	-2.61824	-2.90454	-2.80139	-3.08769	D	0.496832	0.610385	0.783136	0.896689	NC	-2.04088	-1.92733	-1.94619	-1.83263	D
23082	PPRC1	-0.247797	-0.521453	-0.382322	-0.655978	NC	-1.51696	-1.96153	-1.65149	-2.09605	D	-0.101102	-0.345028	0.343461	0.0995357	NC	-1.37027	-1.61419	-1.09661	-1.34054	D
23087	TRIM35	-0.287905	-0.133182	-0.653241	-0.498518	NC	-2.16077	-3.16077	-2.52611	-3.52611	D	-0.742842	-0.813231	0.257158	0.186769	NC	-2.61571	-2.6861	-2.77043	-2.84082	D
23092	ARHGAP26	-0.38813	-0.656191	-0.137504	-0.405565	NC	1.67177	1.90209	1.92239	2.15272	U	0.451065	0.272033	0.220743	0.0417103	NC	2.51096	2.33193	2.77902	2.59999	U
23111	SPG20	-0.0200459	0.207933	-0.455432	-0.227453	NC	-2.04762	-2.73541	-2.483	-3.17079	D	0.147154	0.168849	0.834941	0.856636	NC	-1.88042	-1.85872	-2.1084	-2.0867	D
23112	TNRC6B	0.198329	0.0350065	0.0770224	-0.0862998	NC	1.83102	1.7217	1.70972	1.60039	U	0.210145	0.148584	0.31947	0.257909	NC	1.84284	1.78128	2.00616	1.9446	U
23119	HIC2	0.34915	-0.534336	0.0135465	-0.869939	NC	1.70044	1.28011	1.36484	0.944505	U	-0.19189	0.150417	0.228441	0.570749	NC	1.1594	1.50171	2.04289	2.38519	U
2313	FLI1	0.232411	0.500429	-0.368106	-0.100088	NC	-1.87643	-2.5502	-2.47694	-3.15071	D	-0.258734	-0.422233	0.415037	0.251539	NC	-2.36757	-2.53107	-2.63559	-2.79909	D
23130	ATG2A	0.249172	-0.829199	0.253119	-0.825252	NC	2.29728	2.17604	2.30123	2.17999	U	-0.547364	-0.548537	-0.426128	-0.427301	NC	1.50074	1.49957	2.57911	2.57794	U
23142	DCUN1D4	-0.301918	-0.348363	-0.361908	-0.408352	NC	-1.85155	-2.52034	-1.91154	-2.58033	D	-0.28886	-0.226276	0.379934	0.442518	NC	-1.83849	-1.77591	-1.79204	-1.72946	D
23160	WDR43	-0.0907371	-0.0540565	-0.36343	-0.326749	NC	-2.6626	-2.2236	-2.93529	-2.4963	D	0.171203	-0.0467689	-0.267795	-0.485766	NC	-2.40066	-2.61863	-2.43734	-2.65531	D
23173	METAP1	-0.18375	-0.296946	-0.233587	-0.346783	NC	-2.08994	-1.97852	-2.13978	-2.02835	D	-0.170254	0.289985	-0.281675	0.178564	NC	-2.07644	-1.6162	-1.96325	-1.50301	D
23175	LPIN1	-0.732128	-0.564217	-1.11872	-0.950812	NC	1.89741	1.60601	1.51082	1.21941	U	-0.972943	-0.9615	-0.681538	-0.670096	NC	1.6566	1.66804	1.48869	1.50013	U
23180	RFTN1	-0.201822	-0.342796	-0.577724	-0.718697	NC	-1.5812	-2.65046	-1.9571	-3.02636	D	-0.624961	-1	0.444302	0.0692627	NC	-2.00434	-2.37938	-1.86337	-2.2384	D
23189	KANK1	-0.117584	-0.327138	-0.593534	-0.803088	NC	-1.36109	-1.77867	-1.83704	-2.25462	D	-0.407424	-0.27684	0.0101599	0.140744	NC	-1.65093	-1.52034	-1.44137	-1.31079	D
23204	ARL6IP1	0.841243	0.897664	0.215265	0.271686	NC	2.46754	2.5022	1.84156	1.87622	U	0.00829006	0.258367	-0.0263731	0.223704	NC	1.63459	1.88466	1.57817	1.82824	U
23210	JMJD6	0.181066	0.267996	0.438519	0.52545	NC	-2.14911	-1.93085	-1.89165	-1.6734	D	0.429434	0.510019	0.211181	0.291766	NC	-1.90074	-1.82015	-1.98767	-1.90708	D
23212	RRS1	-0.482024	-0.430707	-0.301163	-0.249845	NC	-3.02697	-2.92707	-2.84611	-2.74621	D	0.05606	0.336014	-0.0438386	0.236115	NC	-2.48888	-2.20893	-2.5402	-2.26025	D
23254	KAZN	-0.417472	-0.748364	-0.66604	-0.996932	NC	-4.21189	-3.62693	-4.46046	-3.87549	D	0.0874628	0.507795	-0.4975	-0.0771679	NC	-3.70695	-3.28662	-3.37606	-2.95573	D
23255	MTCL1	-0.105182	-0.0516328	-0.224123	-0.170574	NC	-3.47644	-2.64245	-3.59538	-2.76139	D	1.33442	0.93587	0.500429	0.10188	NC	-2.03684	-2.43539	-2.09039	-2.48894	D
23269	MGA	0.542697	0.403633	-0.474243	-0.613307	NC	-1.49683	-2.98868	-2.51377	-4.00562	D	-0.447459	-0.0655883	1.04439	1.42626	NC	-2.48699	-2.10512	-2.34792	-1.96605	D
23316	CUX2	0	-1	1	NA	NC	2.16993	1.58496	3.16993	2.58496	U	0.415037	-1.16993	1	-0.584963	NC	2.58496	1	3.58496	2	U
23322	RPGRIP1L	0.315096	0.511161	0.216318	0.412383	NC	-1.46512	-2.18133	-1.5639	-2.28011	D	0.626185	0.120294	1.34239	0.836501	NC	-1.15403	-1.65992	-1.3501	-1.85599	D
23329	TBC1D30	-0.218895	-0.189314	-0.228203	-0.198622	NC	-3.71687	-3.8452	-3.72618	-3.85451	D	0.467779	0.399607	0.596103	0.527932	NC	-3.0302	-3.09837	-3.05978	-3.12795	D
23336	SYNM	-1.29546	-0.947533	-0.710493	-0.36257	NC	2.73697	1.93161	3.32193	2.51658	U	0.353637	-0.40439	1.15899	0.400962	NC	4.38606	3.62803	4.03814	3.28011	U
23338	JADE2	0.900339	0.163686	0.508689	-0.227964	NC	-2.27711	-2.48683	-2.66876	-2.87848	D	0.397964	0.442358	0.607683	0.652077	NC	-2.77948	-2.73509	-2.04283	-1.99844	D
23367	LARP1	0.325415	0.0680241	-0.0505931	-0.307984	NC	-1.86203	-2.1541	-2.23804	-2.5301	D	0.194122	0.450525	0.486188	0.742591	NC	-1.99332	-1.73692	-1.73593	-1.47953	D
23368	PPP1R13B	0.28104	-0.115477	0.406365	0.00984779	NC	1.93811	1.81542	2.06343	1.94075	U	-0.122043	-0.509264	0.000643342	-0.386578	NC	1.53502	1.1478	1.93154	1.54432	U
23401	FRAT2	-0.531523	-0.631059	-0.293674	-0.393209	NC	-1.30726	-1.79194	-1.06941	-1.55409	D	-1.25074	-1.04369	-0.766059	-0.559014	NC	-2.02647	-1.81943	-1.92694	-1.71989	D
23424	TDRD7	0.203872	0.00321671	-0.0331669	-0.233822	NC	-1.05916	-1.97446	-1.2962	-2.2115	D	-0.0270937	-0.288761	0.888209	0.626542	NC	-1.29013	-1.5518	-1.08947	-1.35114	D
23440	OTP	NA	NA	NA	NA	NA	5.08746	5.85798	5.08746	5.85798	U	-0.229482	-0.332575	-1	-1.10309	NC	4.85798	4.75489	4.85798	4.75489	U
23456	ABCB10	0.0950783	0.321186	-0.352504	-0.126396	NC	-1.91014	-1.4692	-2.35772	-1.91678	D	0.619396	0.93587	0.178457	0.49493	NC	-1.38582	-1.06935	-1.61193	-1.29546	D
23467	NPTXR	-0.389042	-0.196397	-0.0339473	0.158698	NC	1.54956	1.42809	1.90465	1.78319	U	-0.297494	-0.602996	-0.17603	-0.481533	NC	1.64111	1.3356	1.44846	1.14296	U
23469	PHF3	0.661358	0.392525	-0.00550123	-0.274335	NC	-0.781973	-1.69826	-1.44883	-2.36512	D	-1.41879	-0.712198	-0.5025	0.204092	NC	-2.86212	-2.15553	-2.59329	-1.8867	D
23481	PES1	-0.1943	-0.387924	-0.0249072	-0.218531	NC	-1.38566	-1.37596	-1.21627	-1.20657	D	-0.111282	-0.289777	-0.120985	-0.299481	NC	-1.30264	-1.48114	-1.10902	-1.28752	D
2353	FOS	0.142145	-0.147844	-0.0524739	-0.342463	NC	-3.90437	-4.23394	-4.09899	-4.42856	D	-0.624366	-0.323647	-0.294794	0.00592483	NC	-4.67088	-4.37016	-4.38089	-4.08017	D
2354	FOSB	-0.542437	-1.09406	-0.505404	-1.05702	NC	-2.02514	-2.71825	-1.9881	-2.68122	D	-1.0579	-1.06307	-0.364787	-0.369964	NC	-2.5406	-2.54577	-1.98898	-1.99415	D
2355	FOSL2	0.459084	-0.0289902	-0.0805277	-0.568602	NC	-1.13425	-2.49772	-1.67387	-3.03734	D	0.055614	-0.171501	1.41908	1.19197	NC	-1.53772	-1.76484	-1.04965	-1.27677	D
23590	PDSS1	0.0783556	0.441632	-0.326243	0.0370327	NC	-2.0645	-1.8413	-2.4691	-2.2459	D	0.198947	-0.00562455	-0.0242475	-0.228819	NC	-1.94391	-2.14848	-2.30718	-2.51175	D
23613	ZMYND8	0.412843	0.517639	0.280932	0.385728	NC	-1.20207	-1.90251	-1.33398	-2.03442	D	-0.612977	-0.725243	0.0874628	-0.0248034	NC	-2.22789	-2.34016	-2.33269	-2.44496	D
23615	PYY2	0.938599	1.90689	-0.605721	0.36257	NC	7.04075	7.63783	5.49643	6.09351	U	0.185666	-0.268157	-0.41142	-0.865243	NC	6.28781	5.83399	5.31952	4.8657	U
23632	CA14	-0.0365259	-0.621488	-0.469485	-1.05445	NC	2.0268	2.38543	1.59384	1.95247	U	0.273324	-0.515838	-0.0853073	-0.874469	NC	2.33665	1.54749	2.92161	2.13245	U
23636	NUP62	0.576023	0.268253	0.421028	0.113259	NC	-1.28393	-1.12777	-1.43893	-1.28276	D	0.194597	0.107845	0.0384331	-0.0483188	NC	-1.66536	-1.75211	-1.35759	-1.44434	D
23645	PPP1R15A	0.256038	0.00331617	0.414111	0.161389	NC	-1.28581	-1.59442	-1.12774	-1.43635	D	-0.209568	-0.329127	0.0990397	-0.0205195	NC	-1.75142	-1.87098	-1.49869	-1.61825	D
23670	TMEM2	1.07039	1.05195	0.551015	0.532578	NC	4.23266	3.73913	3.71329	3.21975	U	-0.210885	-0.0818303	0.282648	0.411702	NC	2.95139	3.08044	2.96982	3.09888	U
23677	SH3BP4	-0.162096	-0.153852	-0.407785	-0.399541	NC	-1.82782	-3.19979	-2.07351	-3.44548	D	-0.289507	-0.0671142	1.08246	1.30485	NC	-1.95523	-1.73284	-1.96347	-1.74108	D
23729	SHPK	0.458158	0.017403	0.697575	0.25682	NC	2.53267	2.05412	2.77209	2.29354	U	0.263639	-0.231905	0.742184	0.24664	NC	2.33815	1.84261	2.7789	2.28336	U
23760	PITPNB	-0.386202	-0.152703	-0.334049	-0.10055	NC	-1.36629	-1.78628	-1.31414	-1.73413	D	-0.472912	-0.885338	-0.0529224	-0.465349	NC	-1.453	-1.86543	-1.6865	-2.09893	D
239	ALOX12	0.367732	0.403356	0.112475	0.148099	NC	2.75316	2.8467	2.49791	2.59145	U	0.568765	-0.0138722	0.475225	-0.107413	NC	2.9542	2.37156	2.91857	2.33593	U
24	ABCA4	NA	NA	NA	NA	NA	2.80735	4.16993	2.80735	4.16993	U	0.652077	0.192645	-0.710493	-1.16993	NC	3.45943	3	3.45943	3	U
24138	IFIT5	-0.271241	-0.0197019	-0.564785	-0.313246	NC	-2.78092	-2.8822	-3.07446	-3.17574	D	0.355762	0.457207	0.457045	0.55849	NC	-2.15391	-2.05247	-2.40545	-2.30401	D
24146	CLDN15	0.14594	-0.199309	-0.120967	-0.466216	NC	2.20467	2.39718	1.93776	2.13028	U	-0.253174	-0.46259	-0.445693	-0.655109	NC	1.80555	1.59614	2.1508	1.94138	U
24149	ZNF318	0.841987	0.381528	-0.0563729	-0.516832	NC	-0.765044	-2.34169	-1.6634	-3.24005	D	-0.819918	-0.423401	0.756729	1.15325	NC	-2.42695	-2.03043	-1.96649	-1.56997	D
246330	PELI3	0.354109	-0.0665977	0.403766	-0.0169399	NC	-1.32736	-2.22239	-1.2777	-2.17273	D	-0.0136749	-1.51847	0.881356	-0.623437	NC	-1.69515	-3.19994	-1.27444	-2.77923	D
252884	ZNF396	1.16993	0	-0.530515	-1.70044	NC	3.39232	2.58496	1.69188	0.884523	U	0.673772	0.0671142	1.48113	0.874469	NC	2.89616	2.28951	4.06609	3.45943	U
2534	FYN	0.0303736	0.615336	-0.790077	-0.205114	NC	1.7028	2.15966	0.882348	1.33921	U	0.349942	-0.191299	-0.106915	-0.648156	NC	2.02237	1.48113	1.43741	0.896164	U
253738	EBF3	NA	NA	NA	NA	NA	3.16993	4.90689	3.16993	4.90689	U	1.22239	0.830075	-0.514573	-0.906891	NC	4.39232	4	4.39232	4	U
253868	C20orf166-AS1	-0.212994	0.281771	0.10188	0.596644	NC	1.37197	1.78701	1.68684	2.10188	U	0.479168	0.245625	0.0641303	-0.169413	NC	2.06413	1.83059	1.56937	1.33582	U
254050	LRRC43	NA	NA	NA	NA	NA	6.20945	6.76818	6.20945	6.76818	U	-0.428094	-0.376563	-0.986825	-0.935294	NC	5.78136	5.83289	5.78136	5.83289	U
254394	MCM9	0.265189	0	-0.581369	-0.846559	NC	-1.10046	-2.04601	-1.94702	-2.89257	D	-0.510615	-0.0565835	0.434937	0.888969	NC	-1.87626	-1.42223	-1.61108	-1.15704	D
254427	PROSER2	-0.868388	-0.859039	-0.875021	-0.865672	NC	-3.8201	-4.23799	-3.82674	-4.24462	D	-0.378512	-0.297592	0.0393742	0.120294	NC	-3.33023	-3.24931	-3.33958	-3.25866	D
255031	LINC00957	0.504473	0.723482	0.626957	0.845966	NC	1.87752	1.28109	2	1.40358	U	0.541709	-0.118905	1.13813	0.477516	NC	1.91475	1.25414	1.69574	1.03513	U
255426	RASGEF1C	0.534777	0.314511	0.75409	0.533824	NC	-2.70044	-1.37851	-2.48113	-1.1592	D	0.584963	1.45943	-0.736966	0.137504	NC	-2.65025	-1.77578	-2.42999	-1.55552	D
255631	COL24A1	NA	NA	NA	NA	NA	4.58496	3	4.58496	3	U	-2	-0.884523	-0.415037	0.70044	NC	2.58496	3.70044	2.58496	3.70044	U
256302	NATD1	0.588998	0.418065	0.407	0.236067	NC	2.32435	2.37431	2.14235	2.19231	U	0.127345	-0.145027	0.0773871	-0.194985	NC	1.8627	1.59033	2.03363	1.76126	U
256380	SCML4	-0.509014	0.0384741	-1.13245	-0.584963	NC	1.79055	1.88858	1.16711	1.26514	U	-0.29956	-0.258533	-0.397592	-0.356565	NC	2	2.04103	1.45251	1.49354	U
2564	GABRE	-0.603934	-0.76348	-0.53731	-0.696855	NC	1.33896	1.16344	1.40559	1.23006	U	-0.384212	-0.632471	-0.208689	-0.456948	NC	1.55868	1.31042	1.71823	1.46997	U
2570	GABRR2	-0.696608	-0.425306	0.688056	0.959358	NC	2.73081	2.1936	4.11548	3.57827	U	0.584963	0.439112	1.12217	0.976321	NC	4.01238	3.86653	3.74108	3.59523	U
257218	SHPRH	0.128475	-0.148863	-0.328383	-0.605721	NC	-1.78978	-2.24616	-2.24664	-2.70302	D	-0.238787	0.543622	0.217591	1	NC	-2.15704	-1.37464	-1.87971	-1.0973	D
257364	SNX33	0.608096	0.543402	-0.0451833	-0.109878	NC	-2.14091	-2.70517	-2.79419	-3.35845	D	0.448015	-1.67974	1.01228	-1.11548	NC	-2.30099	-4.42875	-2.2363	-4.36405	D
25861	DFNB31	0.617913	0.46073	0.575685	0.418501	NC	2.52418	2.27843	2.48195	2.2362	U	-0.0301095	-0.662758	0.215647	-0.417002	NC	1.87616	1.24351	2.03334	1.4007	U
25862	USP49	0.0424353	0.231591	-0.189156	0	NC	1.92449	1.83679	1.6929	1.6052	U	0.400309	0.297905	0.488008	0.385604	NC	2.28236	2.17996	2.0932	1.9908	U
259217	HSPA12A	0.597563	0.68281	-0.0970245	-0.0117772	NC	2.87619	2.52686	2.18161	1.83227	U	0.0458037	0.058273	0.395138	0.407607	NC	2.32443	2.3369	2.23919	2.25166	U
25929	GEMIN5	-0.257121	-0.484824	-0.353741	-0.581445	NC	-2.0726	-2.41688	-2.16922	-2.5135	D	-0.0255728	0.0900698	0.318707	0.434349	NC	-1.84105	-1.72541	-1.61335	-1.49771	D
25940	FAM98A	0.0729124	0.0690289	-0.0889829	-0.0928663	NC	-2.41943	-2.417	-2.58132	-2.5789	D	0.379444	0.656698	0.377021	0.654276	NC	-2.11289	-1.83564	-2.10901	-1.83176	D
25961	NUDT13	-0.411069	-0.111508	0.420332	0.719892	NC	1.17917	1.41653	2.01057	2.24793	U	0.940887	0.0718929	0.703529	-0.165465	NC	2.53112	1.66213	2.23156	1.36257	U
25966	C2CD2	-0.0647887	-0.183109	-0.330235	-0.448555	NC	-1.91734	-2.32555	-2.18278	-2.591	D	-0.00685367	0.261894	0.401363	0.670111	NC	-1.8594	-1.59065	-1.74108	-1.47233	D
25974	MMACHC	0.157183	-0.0571649	0.118272	-0.096076	NC	-1.21205	-1.36941	-1.25096	-1.40832	D	-0.184425	-0.592194	-0.0270682	-0.434838	NC	-1.55366	-1.96143	-1.33931	-1.74708	D
26003	GORASP2	-0.0464085	0.0938441	-0.238393	-0.0981405	NC	-1.33365	-1.82407	-1.52563	-2.01605	D	0.128927	0.0506409	0.619345	0.541059	NC	-1.15831	-1.2366	-1.29857	-1.37685	D
26031	OSBPL3	-0.0513604	0.102771	-0.16971	-0.0155781	NC	-1.87821	-2.00749	-1.99656	-2.12584	D	0.204618	0.162271	0.333901	0.291554	NC	-1.62223	-1.66458	-1.77637	-1.81871	D
26038	CHD5	0	NA	0	NA	NA	4.08746	3.70044	4.08746	3.70044	U	-0.628031	-0.765535	-0.241008	-0.378512	NC	3.45943	3.32193	3.45943	3.32193	U
260425	MAGI3	0.50696	0.520257	0.125531	0.138828	NC	2.5562	2.00946	2.17477	1.62803	U	-0.0162285	-0.0162285	0.530515	0.530515	NC	2.03302	2.03302	2.01972	2.01972	U
26049	FAM169A	0.285402	0.519636	0.296718	0.530952	NC	-2.14202	-2.60768	-2.1307	-2.59637	D	0.741932	0.617752	1.2076	1.08342	NC	-1.68549	-1.80967	-1.91972	-2.0439	D
26052	DNM3	0.584963	0.874469	-0.530515	-0.241008	NC	2.62449	2.27302	1.50901	1.15754	U	-0.402098	0.0384741	-0.0506261	0.389947	NC	1.63743	2.078	1.34792	1.7885	U
26056	RAB11FIP5	0.277055	0.0487593	0.152934	-0.075362	NC	-1.42106	-2.11247	-1.54518	-2.2366	D	-0.361708	0.0328238	0.329705	0.724237	NC	-2.05982	-1.66529	-1.83153	-1.437	D
26060	APPL1	-0.105819	0.0612177	-0.466925	-0.299889	NC	-1.31645	-0.936681	-1.67756	-1.29779	D	-0.437064	-0.137504	-0.816836	-0.517276	NC	-1.6477	-1.34814	-1.81473	-1.51517	D
26064	RAI14	-0.178749	-0.133443	-0.426718	-0.381412	NC	-1.59202	-2.58731	-1.83999	-2.83528	D	0.0802341	-0.0165965	1.07553	0.978696	NC	-1.33303	-1.42986	-1.37834	-1.47517	D
26065	LSM14A	0.0299612	0.0123671	-0.0267418	-0.0443358	NC	-1.48815	-1.86698	-1.54485	-1.92369	D	0.00326279	0.132049	0.382101	0.510887	NC	-1.51484	-1.38606	-1.49725	-1.36846	D
26094	DCAF4	-0.891676	-0.747199	-0.842494	-0.698017	NC	-2.42626	-2.70637	-2.37708	-2.65719	D	-0.611729	-1.31928	-0.331621	-1.03917	NC	-2.14632	-2.85387	-2.2908	-2.99834	D
26118	WSB1	0.662624	0.851049	0.587007	0.775432	NC	2.01328	2.31642	1.93766	2.2408	U	0.0410759	0.194247	-0.262061	-0.10889	NC	1.39173	1.5449	1.20331	1.35648	U
26137	ZBTB20	0	0.395929	-0.337035	0.0588937	NC	2.59756	2.88136	2.26053	2.54432	U	-0.260528	0	-0.544321	-0.283793	NC	2.33703	2.59756	1.94111	2.20163	U
26140	TTLL3	-0.400538	-0.754175	-0.526069	-0.879706	NC	1.65363	2.04076	1.5281	1.91523	U	0.0997773	-0.558919	-0.287352	-0.946048	NC	2.15395	1.49525	2.50758	1.84889	U
26225	ARL5A	-0.0255942	0.232755	-0.1643	0.0940484	NC	-1.15593	-1.44626	-1.29464	-1.58496	D	-0.650322	-0.269439	-0.359996	0.0208874	NC	-1.78066	-1.39977	-2.03901	-1.65812	D
26233	FBXL6	-0.327371	-0.312574	-0.0505406	-0.0357436	NC	-1.74903	-2.1135	-1.4722	-1.83667	D	0.113305	0.201129	0.477773	0.565597	NC	-1.30836	-1.22053	-1.32316	-1.23533	D
26249	KLHL3	NA	1	NA	1	NC	6.20945	5.97728	6.20945	5.97728	U	0.165586	0.249978	0.39776	0.482152	NC	6.37504	6.45943	5.37504	5.45943	U
26267	FBXO10	0.698233	0.127917	0.68871	0.118395	NC	1.92147	1.66849	1.91194	1.65896	U	0.487587	0.295456	0.740568	0.548437	NC	1.71082	1.51869	2.28114	2.08901	U
26354	GNL3	-0.351978	-0.253146	-0.298315	-0.199483	NC	-1.37151	-1.30114	-1.31785	-1.24748	D	-0.260621	-0.226308	-0.330994	-0.296681	NC	-1.28016	-1.24584	-1.37899	-1.34468	D
26502	NARF	0.354283	-0.00496625	0.592253	0.233003	NC	1.68202	2.00279	1.91999	2.24076	U	0.139083	0.221896	-0.181686	-0.0988731	NC	1.46682	1.54963	1.82607	1.90888	U
26504	CNNM4	0.579424	0.423305	-0.0256649	-0.181784	NC	3.76894	3.17238	3.16386	2.56729	U	-0.694875	-0.874266	-0.0983099	-0.277701	NC	2.49465	2.31525	2.65076	2.47137	U
26778	SNORA70	-0.795593	-1.04004	0.114623	-0.129825	NC	-2.114	-3.31787	-1.20379	-2.40766	D	-0.447895	0.104745	0.755978	1.30862	NC	-1.7663	-1.21366	-1.52186	-0.969215	D
268	AMH	-0.658492	-0.606403	0.633506	0.685595	NC	1.02223	1.61086	2.31423	2.90286	U	0.150679	-0.0619761	-0.437956	-0.650611	NC	1.8314	1.61875	1.77931	1.56666	U
26816	SNORD35A	-0.656804	-0.933647	0.0412725	-0.235571	NC	-1.92078	-2.01684	-1.2227	-1.31877	D	0.0360264	-0.467215	0.132092	-0.37115	NC	-1.22795	-1.73119	-0.951105	-1.45435	D
2688	GH1	NA	NA	NA	NA	NA	7.75489	8.85487	7.75489	8.85487	U	0.979822	-0.345497	-0.120159	-1.44548	NC	8.73471	7.40939	8.73471	7.40939	U
2693	GHSR	NA	NA	NA	NA	NA	6.53916	6.88264	6.53916	6.88264	U	-0.632268	-0.451696	-0.975752	-0.79518	NC	5.90689	6.08746	5.90689	6.08746	U
26973	CHORDC1	-0.284506	-0.0974878	-0.6815	-0.494482	NC	-2.3614	-3.37197	-2.75839	-3.76896	D	0.140373	0.890653	1.15094	1.90122	NC	-1.93652	-1.18624	-2.12354	-1.37326	D
27006	FGF22	NA	NA	NA	NA	NA	5.75489	5.75489	5.75489	5.75489	U	-1	-1.11103	-1	-1.11103	NC	4.75489	4.64386	4.75489	4.64386	U
27043	PELP1	-0.335342	-0.515834	-0.23795	-0.418442	NC	-1.52267	-1.65082	-1.42528	-1.55343	D	-0.200299	-0.294615	-0.0721498	-0.166467	NC	-1.38762	-1.48194	-1.20713	-1.30145	D
2707	GJB3	-0.633733	-0.591455	-0.608917	-0.566639	NC	-3.36749	-4.27607	-3.34268	-4.25125	D	-0.891801	-0.984355	0.0167757	-0.0757778	NC	-3.62556	-3.71811	-3.66784	-3.76039	D
2709	GJB5	-0.702678	-0.669912	-0.504503	-0.471737	NC	-2.5685	-3.48516	-2.37033	-3.28699	D	-0.554801	-0.569803	0.36186	0.346857	NC	-2.42062	-2.43563	-2.45339	-2.46839	D
27124	INPP5J	-0.338802	-0.178337	0.0874628	0.247928	NC	2.42548	1.73361	2.85175	2.15987	U	-0.897553	-1.07039	-0.205675	-0.378512	NC	1.86673	1.6939	1.70627	1.53343	U
27146	FAM184B	-0.91427	-2.02975	-0.0544478	-1.16993	NC	1.89308	1.8365	2.75291	2.69632	U	-0.54201	-0.298341	-0.485427	-0.241758	NC	2.26534	2.50901	3.38082	3.62449	U
27292	DIMT1	0.0493034	0.138124	0.0935663	0.182387	NC	-1.62517	-2.08602	-1.58091	-2.04176	D	-0.785847	-0.44202	-0.324997	0.0188301	NC	-2.46032	-2.11649	-2.54914	-2.20531	D
27347	STK39	-1.1935	-0.72705	-1.29714	-0.830692	NC	-1.93959	-1.62532	-2.04324	-1.72896	D	-0.161363	-0.551015	-0.475638	-0.86529	NC	-0.90746	-1.29711	-1.37391	-1.76356	D
27349	MCAT	-0.184242	-0.0339154	0.43601	0.586336	NC	-2.14073	-1.82353	-1.52047	-1.20328	D	0.278716	0.312437	-0.0384741	-0.00475353	NC	-1.67777	-1.64405	-1.82809	-1.79437	D
2770	GNAI1	-0.613598	-0.24834	-0.526629	-0.161371	NC	-2.22503	-1.92547	-2.13806	-1.8385	D	-0.142444	-0.142444	-0.442005	-0.442005	NC	-1.75388	-1.75388	-2.11914	-2.11914	D
280	AMY2B	0.380604	0.77458	-0.18303	0.210946	NC	1.33817	2.19094	0.774535	1.62731	U	0.622744	1.01428	-0.23003	0.16151	NC	1.58031	1.97185	1.18633	1.57787	U
2805	GOT1	-0.211274	-0.0771335	-0.0658621	0.068278	NC	1.59784	1.68022	1.74325	1.82563	U	-0.397159	-0.352385	-0.479541	-0.434767	NC	1.41195	1.45673	1.27781	1.32259	U
2827	GPR3	-0.140863	-1.14086	1.76184	0.76184	NC	0.629018	1.71329	2.53172	3.61599	U	0.665817	-0.222392	-0.418452	-1.30666	NC	1.4357	0.547488	2.4357	1.54749	U
283045	LOC283045	0.970854	1.02857	0.570316	0.628031	NC	2.32193	2.55582	1.92139	2.15528	U	0.347099	0.0676387	0.113211	-0.166249	NC	1.69817	1.41871	1.64046	1.361	U
283078	MKX	NA	NA	NA	NA	NA	7.13955	6.88264	7.13955	6.88264	U	0.415037	-0.162271	0.671946	0.0946369	NC	7.55459	6.97728	7.55459	6.97728	U
283229	CRACR2B	1.8371	1.00749	0.771013	-0.0585947	NC	3.80305	3.35755	2.73697	2.29146	U	0.266619	-0.076269	0.712122	0.369234	NC	2.23257	1.88968	3.06218	2.71929	U
283349	RASSF3	-0.579642	-0.334419	-0.41548	-0.170257	NC	-1.45588	-2.03598	-1.29172	-1.87182	D	-1.52763	-0.654865	-0.947533	-0.0747678	NC	-2.40387	-1.5311	-2.64909	-1.77633	D
283417	DPY19L2	NA	NA	NA	NA	NA	2.80735	3.32193	2.80735	3.32193	U	0	-0.807355	-0.514573	-1.32193	NC	2.80735	2	2.80735	2	U
283471	TMPRSS12	NA	NA	NA	NA	NA	5.12928	5.97728	5.12928	5.97728	U	0.040642	-0.0848889	-0.807355	-0.932886	NC	5.16993	5.04439	5.16993	5.04439	U
283551	LINC01588	-0.989274	-1.76231	-0.271913	-1.04495	NC	1.30678	1.30023	2.02414	2.01759	U	0.0344027	-0.230758	0.0409455	-0.224215	NC	2.33045	2.06529	3.10349	2.83833	U
283571	PROX2	-2.44057	-1	-0.652077	0.788496	NC	1.80735	1.2115	3.59585	3	U	-0.547488	0.114643	0.048363	0.710493	NC	3.70044	4.36257	2.25987	2.922	U
283596	SNHG10	0.617752	0.771376	-0.466781	-0.313158	NC	2.60145	2.54716	1.51692	1.46263	U	-0.206766	-0.448204	-0.152476	-0.393914	NC	1.77693	1.53549	1.62331	1.38187	U
2837	UTS2R	NA	NA	NA	NA	NA	3.32193	4.32193	3.32193	4.32193	U	1.07039	1.926	0.0703893	0.925999	NC	4.39232	5.24793	4.39232	5.24793	U
283871	PGP	-0.0163387	0.0973678	0.288229	0.401936	NC	-2.44569	-2.12199	-2.14112	-1.81742	D	0.860725	0.722734	0.537028	0.399037	NC	-1.56862	-1.70661	-1.68233	-1.82032	D
283981	LINC00685	-1.34465	-0.862496	-0.251539	0.230613	NC	1.87529	2.12722	2.9684	3.22033	U	-0.870787	-0.217077	-1.12272	-0.469009	NC	2.34915	3.00286	1.867	2.52071	U
283989	TSEN54	0.353404	0.118362	0.285315	0.0502732	NC	-1.6452	-1.38964	-1.71329	-1.45773	D	-0.249676	-0.472068	-0.505235	-0.727628	NC	-2.24828	-2.47067	-2.01324	-2.23563	D
284018	C17orf58	0.730343	0.803679	0.704872	0.778209	NC	-2.83703	-1.23468	-2.8625	-1.26015	D	0.263034	0.773229	-1.33931	-0.829115	NC	-3.30433	-2.79414	-3.37767	-2.86748	D
2841	GPR18	1	1.58496	-0.0874628	0.4975	NC	-3	-3	-4.08746	-4.08746	D	NA	NA	NA	NA	NA	-4	-4	-4.58496	-4.58496	D
284390	ZNF763	-0.685891	-1.30256	0.823122	0.206451	NC	0.249978	1.31411	1.75899	2.82312	U	0.606658	0.932886	-0.457473	-0.131245	NC	1.54253	1.86876	2.1592	2.48543	U
284415	VSTM1	-1.12229	0.117437	-0.428843	0.810884	NC	1.13611	1.93616	1.82956	2.62961	U	0.143396	0.436906	-0.656651	-0.363141	NC	2.4018	2.69531	1.16207	1.45558	U
284486	THEM5	NA	NA	NA	NA	NA	6.10852	4.52356	6.10852	4.52356	U	-1.52356	-0.68226	0.0614005	0.902703	NC	4.58496	5.42626	4.58496	5.42626	U
284551	LINC01226	0.0317089	-0.243926	0.716207	0.440573	NC	1.05504	1.58496	1.73954	2.26946	U	0.607924	0.0229611	0.0780025	-0.50696	NC	1.63126	1.04629	1.90689	1.32193	U
2850	GPR27	0.225252	0.580503	-0.272526	0.0827249	NC	-2.04064	-2.37985	-2.53842	-2.87763	D	-0.321928	0.915111	0.017278	1.25432	NC	-2.58782	-1.35078	-2.94307	-1.70603	D
285315	C3orf33	NA	NA	NA	NA	NA	8.39232	7.13955	8.39232	7.13955	U	0.127319	-0.830075	1.38008	0.422691	NC	8.51964	7.56224	8.51964	7.56224	U
285368	PRRT3	-0.656046	-0.0710831	0.0220263	0.606989	NC	1.44931	1.15131	2.12738	1.82938	U	-0.21901	-0.348847	0.0789883	-0.0508491	NC	1.88634	1.75651	1.30138	1.17154	U
285429	DCAF4L1	-0.862496	-0.277534	-0.184425	0.400538	NC	2.51728	2.53605	3.19535	3.21412	U	0.460004	0.771821	0.441227	0.753044	NC	3.83978	4.15159	3.25481	3.56663	U
285598	ARL10	NA	NA	NA	NA	NA	4	2.32193	4	2.32193	U	1.08746	-0.678072	2.76553	1	NC	5.08746	3.32193	5.08746	3.32193	U
285643	KIF4B	NA	NA	NA	NA	NA	2.58496	1.58496	2.58496	1.58496	U	0	-1	1	0	NC	2.58496	1.58496	2.58496	1.58496	U
285696	LOC285696	0.266787	-0.38529	0.909235	0.257158	NC	1.56224	2.11894	2.20469	2.76139	U	-0.00765357	-0.152851	-0.564352	-0.70955	NC	1.2878	1.1426	1.93988	1.79468	U
285800	PRR18	NA	NA	NA	NA	NA	4.58496	4.58496	4.58496	4.58496	U	0.70044	0.169925	0.70044	0.169925	NC	5.2854	4.75489	5.2854	4.75489	U
285908	LINC00174	0.603341	0.242075	0.226965	-0.134301	NC	2.85223	2.73627	2.47585	2.3599	U	0.295954	-0.0708697	0.411911	0.0450879	NC	2.54484	2.17802	2.90611	2.53928	U
285958	SNHG15	0.666576	0.440939	0.226371	0.000733636	NC	-1.55247	-1.19935	-1.99268	-1.63955	D	0.40478	0.791413	0.0516506	0.438284	NC	-1.81427	-1.42764	-1.58863	-1.202	D
285971	ZNF775	1.30378	0.392317	0.877516	-0.0339473	NC	-1.54057	-1.41504	-1.96683	-1.8413	D	-0.874469	0.932886	-1	0.807355	NC	-3.71882	-1.91146	-2.80735	-1	D
285989	ZNF789	-0.620747	-0.502233	-0.565063	-0.446548	NC	1.55903	1.23655	1.61471	1.29224	U	0.0503628	-0.351397	0.372836	-0.0289237	NC	2.23014	1.82838	2.11162	1.70986	U
286002	SLC26A4-AS1	-0.0473057	-0.369234	-0.0473057	-0.369234	NC	1.98832	2.49701	1.98832	2.49701	U	0.970375	0.286304	0.461678	-0.222392	NC	3.006	2.32193	3.32793	2.64386	U
286006	LSMEM1	-0.0588937	0.970854	-0.5025	0.527247	NC	3.76129	4.52105	3.31768	4.07744	U	0.636518	0.954608	-0.123248	0.194843	NC	4.4567	4.77479	3.42695	3.74504	U
286077	FAM83H	0.238835	-0.0620921	0.0621184	-0.238809	NC	-1.51671	-2.37632	-1.69342	-2.55304	D	-0.70729	-0.798213	0.152323	0.0614005	NC	-2.46283	-2.55375	-2.1619	-2.25283	D
286103	ZNF252P-AS1	-0.912537	-0.192645	-0.556393	0.163499	NC	2.26679	1.44294	2.62293	1.79909	U	-0.566347	-0.127235	0.257496	0.696608	NC	2.61298	3.05209	1.89308	2.3322	U
286223	C9orf47	NA	NA	NA	NA	NA	3	1.58496	3	1.58496	U	0.807355	-0.678072	2.22239	0.736966	NC	3.80735	2.32193	3.80735	2.32193	U
286319	TUSC1	0.672396	0.691382	0.8375	0.856487	NC	-1.41752	-1.70901	-1.25241	-1.5439	D	0.0157889	-0.161516	0.307281	0.129977	NC	-2.07412	-2.25143	-2.09311	-2.27041	D
286436	H2BFM	0.547488	-0.893085	0.547488	-0.893085	NC	-3.70044	-3.70044	-3.70044	-3.70044	D	NA	NA	NA	NA	NA	-4.24793	-4.24793	-2.80735	-2.80735	D
286676	ILDR1	1.05889	0.222392	0.836501	0	NC	2.05889	2.08746	1.8365	1.86507	U	0.214125	0.695994	0.185556	0.667425	NC	1.21412	1.69599	2.05063	2.5325	U
28964	GIT1	0.0431266	-0.306881	-0.115991	-0.465999	NC	-1.46424	-2.35074	-1.62335	-2.50986	D	-0.402874	-0.327708	0.483634	0.5588	NC	-1.91024	-1.83507	-1.56023	-1.48506	D
28968	SLC6A16	1.80735	1	0.415037	-0.392317	NC	3.04439	2.85798	1.65208	1.46566	U	1.17477	0.697073	1.36119	0.883486	NC	2.41181	1.93411	3.21917	2.74147	U
2901	GRIK5	0.7176	-0.169925	0.509014	-0.378512	NC	2.49114	1.97575	2.28255	1.76717	U	0.532706	-0.296493	1.04809	0.218895	NC	2.30625	1.47705	3.19377	2.36457	U
29035	C16orf72	-0.0658656	0.187569	-0.251339	0.00209542	NC	2.02658	1.71631	1.84111	1.53084	U	-0.491762	-0.394697	-0.181492	-0.0844272	NC	1.60068	1.69775	1.34725	1.44431	U
2906	GRIN2D	0.114712	-0.347019	0.0851674	-0.376563	NC	-1.68806	-3.27302	-1.7176	-3.30256	D	-0.40439	-0.906891	1.18057	0.678072	NC	-2.20716	-2.70966	-1.74543	-2.24793	D
2908	NR3C1	0.369032	0.539136	-0.0799525	0.0901516	NC	-2.43671	-2.39232	-2.8857	-2.8413	D	0.787903	0.658211	0.743508	0.613817	NC	-2.01784	-2.14753	-2.18795	-2.31764	D
29092	LINC00339	0.376376	0.742504	0.947533	1.31366	NC	1.98956	2.35755	2.56071	2.92871	U	-0.0642891	0.249581	-0.432283	-0.118413	NC	1.54889	1.86276	1.18277	1.49664	U
29107	NXT1	-0.302647	-0.128902	-0.0594694	0.114275	NC	-3.03441	-2.4125	-2.79123	-2.16932	D	0.940587	0.792429	0.318682	0.170525	NC	-1.79117	-1.93933	-1.96492	-2.11307	D
29109	FHOD1	0.664189	0.0956522	0.542906	-0.0256306	NC	-1.25029	-1.41504	-1.37158	-1.53632	D	-0.122703	0	0.0420418	0.164745	NC	-2.03718	-1.91448	-1.46865	-1.34594	D
29110	TBK1	0.0152024	-0.0402927	-0.146549	-0.202044	NC	-1.16497	-1.5743	-1.32672	-1.73606	D	-0.333972	-0.190199	0.0753653	0.219138	NC	-1.51414	-1.37037	-1.45865	-1.31487	D
29116	MYLIP	-1.11189	-0.673772	-0.853159	-0.415037	NC	4.19483	4.40355	4.45356	4.66229	U	-0.731489	-0.602708	-0.940211	-0.81143	NC	4.57523	4.70402	4.13711	4.26589	U
2959	GTF2B	-0.379819	-0.301257	0.0160242	0.0945857	NC	1.89019	2.21221	2.28604	2.60805	U	-0.0556852	-0.210183	-0.377701	-0.532199	NC	2.21433	2.05983	2.13576	1.98127	U
2968	GTF2H4	-0.266659	-0.562957	-0.134035	-0.430332	NC	-1.72854	-2.00908	-1.59592	-1.87645	D	-0.105762	0	0.174774	0.280536	NC	-1.56765	-1.46188	-1.27135	-1.16559	D
2972	BRF1	-0.168994	-0.467652	0.0287702	-0.269888	NC	-2.30415	-1.92451	-2.10639	-1.72675	D	0.61891	0.661415	0.239266	0.281771	NC	-1.51625	-1.47375	-1.21759	-1.17509	D
29763	PACSIN3	0.405465	0.493383	0.581453	0.669371	NC	-2.01309	-2.0056	-1.8371	-1.82961	D	-0.4975	-1	-0.504994	-1.00749	NC	-2.91606	-3.41856	-3.00397	-3.50647	D
2979	GUCA1B	-0.338585	-0.106915	-0.0458037	0.185867	NC	1.76683	2.32634	2.05961	2.61912	U	0.258702	0.184511	-0.300803	-0.374994	NC	2.36412	2.28993	2.13245	2.05826	U
29801	ZDHHC8	-0.164163	-0.653783	-0.201052	-0.690672	NC	-1.21085	-1.828	-1.24774	-1.86489	D	-1.17474	-1.2385	-0.557586	-0.621347	NC	-2.22142	-2.28518	-1.7318	-1.79556	D
29843	SENP1	0.525767	0.413224	0.267574	0.155031	NC	-1.57054	-1.88174	-1.82873	-2.13993	D	0.282639	0.385122	0.593841	0.696324	NC	-1.81366	-1.71118	-1.70112	-1.59864	D
29889	GNL2	-0.422691	-0.377565	-0.414116	-0.368991	NC	-2.29171	-2.08457	-2.28314	-2.07599	D	-0.266927	0.0628948	-0.474075	-0.144254	NC	-2.13595	-1.80613	-2.18107	-1.85125	D
29901	SAC3D1	0.670228	0.417506	0.326074	0.0733517	NC	-1.26699	-2.0066	-1.61115	-2.35076	D	-0.968636	-1.22239	-0.229026	-0.482782	NC	-2.90586	-3.15961	-2.65313	-2.90689	D
29928	TIMM22	0.0854188	0.0632822	0.276366	0.254229	NC	-1.37918	-2.01386	-1.18823	-1.82291	D	-0.307769	-0.697504	0.326914	-0.0628211	NC	-1.77237	-2.1621	-1.75023	-2.13996	D
29949	IL19	1.44057	-0.222392	0.547488	-1.11548	NC	3.65208	4.3322	2.75899	3.43911	U	0.398549	0.282035	-0.28157	-0.398084	NC	2.61005	2.49354	4.27302	4.1565	U
29950	SERTAD1	-0.0598584	0.0515303	0.538669	0.650058	NC	2.74001	3.10083	3.33854	3.69936	U	-0.593417	-0.258584	-0.954241	-0.619408	NC	2.20645	2.54128	2.09506	2.4299	U
29992	PILRA	-0.517399	-1.43494	0.917538	0	NC	2.55164	2.52785	3.98658	3.96279	U	0.508831	-0.265734	0.532622	-0.241943	NC	3.57787	2.80331	4.49541	3.72085	U
30008	EFEMP2	0.782409	1.67807	-0.0331669	0.862496	NC	3.29278	3.22033	2.47721	2.40475	U	0.187483	-0.493694	0.259935	-0.421243	NC	2.69786	2.01668	1.80219	1.12102	U
3008	HIST1H1E	1.97728	0.954196	0.36257	-0.660514	NC	2.67243	3.2854	1.05772	1.67069	U	0.912537	0.920032	0.29956	0.307055	NC	1.60768	1.61518	2.63077	2.63826	U
3021	H3F3B	0.698518	0.799448	0.698348	0.799279	NC	-1.57565	-1.62038	-1.57582	-1.62055	D	-0.056786	0.333825	-0.0120597	0.378552	NC	-2.33096	-1.94034	-2.43189	-2.04127	D
3036	HAS1	-1.04182	-1.66985	0.5025	-0.125531	NC	0.936806	1.39428	2.48113	2.9386	U	-0.856636	0.143364	-1.31411	-0.314109	NC	1.12199	2.12199	1.75002	2.75002	U
3078	CFHR1	NA	NA	NA	NA	NA	5.42626	6.98868	5.42626	6.98868	U	0.821663	0.966053	-0.740757	-0.596367	NC	6.24793	6.39232	6.24793	6.39232	U
30813	VSX1	NA	NA	NA	NA	NA	2.80735	3.90689	2.80735	3.90689	U	1.09954	0.777608	0	-0.321928	NC	3.90689	3.58496	3.90689	3.58496	U
30816	ERVW-1	-0.949626	0.0921937	-0.978626	0.0631938	NC	1.8084	1.56282	1.7794	1.53382	U	0.741975	-0.0381351	0.987552	0.207442	NC	3.5	2.71989	2.45818	1.67807	U
3096	HIVEP1	-0.295649	-0.526748	-0.725462	-0.956561	NC	-1.12862	-2.80948	-1.55843	-3.23929	D	-0.82956	-0.559672	0.851298	1.12119	NC	-1.66253	-1.39264	-1.43143	-1.16154	D
314	AOC2	0.398549	0.479168	1.08539	1.16601	NC	4.30986	3.98903	4.9967	4.67587	U	0.289607	0.0142571	0.610433	0.335083	NC	4.20091	3.92556	4.12029	3.84494	U
3145	HMBS	-0.0671755	-0.385737	0.647653	0.329092	NC	-2.22368	-2.13622	-1.50885	-1.42139	D	0.185867	0.548437	0.0984037	0.460974	NC	-1.97064	-1.60807	-1.65208	-1.28951	D
3155	HMGCL	0.829648	1.01699	0.655929	0.843274	NC	2.40043	2.21259	2.22672	2.03887	U	-0.170249	-0.124354	0.0175941	0.0634888	NC	1.40054	1.44643	1.21319	1.25909	U
317701	VN1R2	0.0733732	-0.541709	-0.251062	-0.866144	NC	3.08377	3.49102	2.75933	3.16658	U	0.315105	-0.256833	-0.0921427	-0.664081	NC	3.3255	2.75356	3.94058	3.36864	U
317760	ADAM20P1	1	0	-0.584963	-1.58496	NC	2.52356	3	0.938599	1.41504	U	1.29662	0.283793	0.820179	-0.192645	NC	2.82018	1.80735	3.82018	2.80735	U
3185	HNRNPF	0.106549	0.214706	-0.0423763	0.0657807	NC	-1.28932	-1.54663	-1.43825	-1.69555	D	0.0743307	0.129907	0.331639	0.387215	NC	-1.32154	-1.26596	-1.4297	-1.37412	D
32	ACACB	-0.556393	-1.05889	0.765535	0.263034	NC	1.48543	1.18903	2.80735	2.51096	U	-0.959358	-0.771731	-0.662965	-0.475338	NC	1.08246	1.27009	1.58496	1.77259	U
3200	HOXA3	0.838134	0.998298	0.611858	0.772022	NC	-1.09856	-1.67264	-1.32484	-1.89891	D	-0.316474	-0.520832	0.257601	0.053242	NC	-2.25317	-2.45753	-2.41334	-2.61769	D
3205	HOXA9	0.417826	0.54878	0.16076	0.291713	NC	-1.10177	-1.67005	-1.35884	-1.92712	D	-0.338802	-0.216811	0.229482	0.351472	NC	-1.8584	-1.73641	-1.98935	-1.86736	D
3206	HOXA10	-0.2074	0.732025	-0.726487	0.212937	NC	-1.70044	-1.91617	-2.21953	-2.43526	D	0.0395284	0.0906025	0.255257	0.306331	NC	-1.45351	-1.40244	-2.39294	-2.34186	D
3212	HOXB2	0.887371	0.0449124	0.504043	-0.338416	NC	-1.16281	-1.77354	-1.54614	-2.15687	D	-0.44514	0.0127111	0.165586	0.623437	NC	-2.49533	-2.03747	-1.65287	-1.19502	D
3223	HOXC6	0.485956	0.3718	0.474887	0.360731	NC	-1.24793	-1.53939	-1.259	-1.55046	D	-0.275403	-0.238611	0.0160599	0.0528519	NC	-2.00929	-1.97249	-1.89513	-1.85834	D
3224	HOXC8	-0.536053	-0.143013	-0.456207	-0.0631663	NC	-3.43348	-3.58235	-3.35364	-3.5025	D	0.327575	-0.0382193	0.476438	0.110644	NC	-2.56986	-2.93565	-2.9629	-3.32869	D
3225	HOXC9	-0.444582	-0.216515	0.176157	0.404224	NC	-1.54412	-1.94736	-0.923379	-1.32662	D	-0.0506261	-0.366128	0.352615	0.0371132	NC	-1.15016	-1.46566	-1.37823	-1.69373	D
3227	HOXC11	-0.630681	-0.935294	-0.223563	-0.528176	NC	-2.37587	-3.63068	-1.96875	-3.22356	D	-1.04182	-0.714246	0.212994	0.540568	NC	-2.78701	-2.45943	-2.48239	-2.15482	D
3263	HPX	0.975752	-0.447459	-0.365284	-1.7885	NC	2.18057	3.78311	0.839535	2.44207	U	-0.359542	0.40439	-1.96208	-1.19814	NC	0.845277	1.60921	2.26849	3.03242	U
328	APEX1	-0.346329	-0.142495	-0.082091	0.121743	NC	-1.25369	-1.60941	-0.989453	-1.34517	D	-0.645739	-0.782958	-0.290024	-0.427243	NC	-1.5531	-1.69032	-1.75694	-1.89415	D
3284	HSD3B2	NA	NA	NA	NA	NA	3.58496	3	3.58496	3	U	0.321928	0.736966	0.906891	1.32193	NC	3.90689	4.32193	3.90689	4.32193	U
3291	HSD11B2	-0.520199	-0.54335	-0.248697	-0.271847	NC	-1.47701	-2.86528	-1.2055	-2.59378	D	-0.883276	-1.17195	0.504994	0.216318	NC	-1.84008	-2.12876	-1.81693	-2.10561	D
3306	HSPA2	0.148863	0.270854	-0.0418202	0.0801703	NC	3.9542	3.96428	3.76351	3.77359	U	-0.0556935	-0.311595	-0.0657753	-0.321677	NC	3.74964	3.49374	3.62765	3.37175	U
3337	DNAJB1	-0.0129391	0.257601	0.259345	0.529885	NC	-1.54749	-1.95331	-1.2752	-1.68102	D	-0.236332	0.0554016	0.169487	0.461221	NC	-1.77088	-1.47915	-2.04142	-1.74969	D
3373	HYAL1	-0.0931094	0.321928	-0.239951	0.175087	NC	2.187	2.5258	2.04016	2.37896	U	0.860515	0.391509	0.521713	0.052707	NC	3.14062	2.67162	2.72559	2.25658	U
337873	HIST2H2BC	-0.745683	-0.580624	-0.222392	-0.0573332	NC	4.53166	3.3062	5.05495	3.82949	U	-1.01568	-1.07976	0.209786	0.145707	NC	4.26167	4.19759	4.09661	4.03253	U
338436	BLACE	-0.533219	-0.98388	0.638734	0.188072	NC	0.595729	1.65869	1.76768	2.83065	U	-0.238572	0.575996	-1.30154	-0.486968	NC	0.890376	1.70494	1.34104	2.15561	U
338442	HCAR2	-0.282828	-0.690171	-0.644165	-1.05151	NC	-1.99052	-2.05165	-2.35186	-2.41298	D	-0.558433	-0.149206	-0.497306	-0.0880792	NC	-2.26612	-1.8569	-1.85878	-1.44955	D
338755	OR2AG2	1	0	1	0	NC	-3.70044	-3.70044	-3.70044	-3.70044	D	NA	NA	NA	NA	NA	-4.70044	-4.70044	-3.70044	-3.70044	D
338773	TMEM119	-0.0294438	0.313158	0.0149503	0.357552	NC	1.79691	2.36782	1.8413	2.41222	U	0.620859	0.507426	0.0499444	-0.0634888	NC	2.44721	2.33378	2.10461	1.99118	U
338799	LINC01089	-0.804744	-0.538669	-0.529109	-0.263034	NC	2.35295	2.1861	2.62859	2.46173	U	0.473686	-0.00204783	0.640544	0.164811	NC	3.63138	3.15565	3.36531	2.88958	U
338817	LINC01252	0.104697	-0.0473057	-0.0143553	-0.166358	NC	1.28102	1.67029	1.16197	1.55124	U	0.354747	0.162815	-0.0345277	-0.22646	NC	1.53107	1.33914	1.68307	1.49114	U
339287	MSL1	0.483745	0.471772	0.20381	0.191837	NC	-1.0652	-2.02673	-1.34514	-2.30666	D	-0.171979	0.181055	0.789547	1.14258	NC	-1.72092	-1.36789	-1.70895	-1.35592	D
339302	CPLX4	NA	NA	NA	NA	NA	5.2854	6.64386	5.2854	6.64386	U	0.269187	0.140863	-1.08927	-1.21759	NC	5.55459	5.42626	5.55459	5.42626	U
339327	ZNF546	-0.313158	-0.207805	-0.203533	-0.0981804	NC	1.64245	1.43035	1.75207	1.53998	U	0.330917	0.103288	0.543014	0.315385	NC	2.28652	2.05889	2.18117	1.95354	U
339344	MYPOP	0.244153	0.183128	0.00432593	-0.0566991	NC	-1.03626	-2.44374	-1.27609	-2.68357	D	-0.375367	-0.546143	1.03211	0.861336	NC	-1.65578	-1.82656	-1.59476	-1.76553	D
339366	ADAMTSL5	-0.000803506	0.147256	0.118025	0.266084	NC	-1.54613	-1.84768	-1.4273	-1.72885	D	-0.0795673	0.0909085	0.221979	0.392455	NC	-1.62489	-1.45442	-1.77295	-1.60248	D
339451	KLHL17	-0.00644925	-0.352493	0.0593785	-0.286666	NC	-2.55314	-2.19983	-2.48731	-2.13401	D	-0.211107	-0.211107	-0.564415	-0.564415	NC	-2.7578	-2.7578	-2.41175	-2.41175	D
340120	ANKRD34B	NA	NA	NA	NA	NA	4.52356	5.42626	4.52356	5.42626	U	1.12029	1.40718	0.217591	0.504473	NC	5.64386	5.93074	5.64386	5.93074	U
340393	TMEM249	1.11103	-0.836501	1.16993	-0.777608	NC	2.5656	2.43296	2.62449	2.49185	U	-0.187086	0.0851674	-0.0544478	0.217805	NC	1.26748	1.53973	3.21501	3.48727	U
340485	ACER2	0.616671	-0.0489096	0.0972972	-0.568284	NC	3.2755	2.48543	2.75613	1.96605	U	-0.321307	-0.549399	0.468769	0.240678	NC	2.33752	2.10943	3.00311	2.77501	U
340508	GAS2L1P2	NA	NA	NA	NA	NA	5.67243	4.08746	5.67243	4.08746	U	-0.543142	-0.971986	1.04182	0.612977	NC	5.12928	4.70044	5.12928	4.70044	U
341640	FREM2	-1	-0.678072	-0.321928	0	NC	1.32193	1.32193	2	2	U	0.137504	-0.736966	0.137504	-0.736966	NC	2.45943	1.58496	2.1375	1.26303	U
342897	NCCRP1	0.15078	-0.588022	0.332983	-0.405819	NC	1.25178	1.59916	1.43399	1.78136	U	0.118239	-0.162883	-0.229134	-0.510256	NC	1.21924	0.938121	1.95804	1.67692	U
342908	ZNF404	0.222392	-0.186413	0.359896	-0.0489096	NC	1.88634	1.68353	2.02385	1.82103	U	-0.18927	-0.407175	0.0135465	-0.204358	NC	1.47468	1.25678	1.88349	1.66558	U
343990	KIAA1211L	-1.1321	-0.752072	-0.821403	-0.441372	NC	1.9331	2.09381	2.2438	2.40451	U	0.483064	-0.151741	0.32235	-0.312454	NC	3.54827	2.91346	3.16824	2.53343	U
345895	RSPH4A	-1.18442	-0.251539	0.289507	1.22239	NC	1.17632	1.55582	2.65025	3.02975	U	0.787151	0.224215	0.407658	-0.155278	NC	3.1479	2.58496	2.21501	1.65208	U
346007	EYS	1	1	0.584963	0.584963	NC	2.32193	1.41504	1.90689	1	U	0.0931094	-0.0995357	1	0.807355	NC	1.41504	1.22239	1.41504	1.22239	U
347688	TUBB8	NA	NA	NA	NA	NA	5.97728	6.62936	5.97728	6.62936	U	1.25154	-0.485427	0.599462	-1.1375	NC	7.22882	5.49185	7.22882	5.49185	U
348654	GEN1	0.262222	0.208399	0.400213	0.34639	NC	-2.30256	-2.12199	-2.16457	-1.984	D	1.12653	1.10434	0.94596	0.923764	NC	-1.43825	-1.46045	-1.38443	-1.40663	D
348738	C2orf48	0.429684	-0.122857	0.722466	0.169925	NC	1.26793	1.74284	1.56071	2.03562	U	1.55199	0.664251	1.07708	0.189342	NC	2.39023	1.5025	2.94278	2.05504	U
349633	PLET1	NA	NA	NA	NA	NA	4.64386	4.70044	4.64386	4.70044	U	0.0565835	1.1635	0	1.10692	NC	4.70044	5.80735	4.70044	5.80735	U
353088	ZNF429	-0.454839	-0.265982	0.431951	0.620808	NC	0.781895	1.26487	1.66868	2.15166	U	0.275821	0.407526	-0.207158	-0.0754522	NC	1.51255	1.64426	1.3237	1.4554	U
3552	IL1A	0.0784312	0.240348	-0.0639361	0.097981	NC	-2.70656	-3.41261	-2.84893	-3.55498	D	0.349921	0.224989	1.05597	0.931037	NC	-2.43507	-2.56	-2.59699	-2.72192	D
3553	IL1B	-1.2303	-0.927291	-1.1125	-0.809489	NC	-4.65503	-4.49879	-4.53723	-4.38099	D	0.738379	-0.151479	0.582139	-0.307719	NC	-2.68635	-3.57621	-2.98936	-3.87922	D
3563	IL3RA	-1.37474	-1.18593	-0.509674	-0.320855	NC	1.31152	1.73979	2.17659	2.60486	U	0.167496	-0.34129	-0.260778	-0.769564	NC	2.85376	2.34497	2.66494	2.15615	U
3566	IL4R	0.904486	0.560104	1.02289	0.678511	NC	-1.4172	-1.99354	-1.29879	-1.87514	D	0.281632	0.238348	0.857981	0.814697	NC	-2.04005	-2.08333	-1.69567	-1.73895	D
3568	IL5RA	NA	1	NA	1	NC	3.45943	4	3.45943	4	U	1.54057	0.447459	1	-0.0931094	NC	5	3.90689	4	2.90689	U
359845	FAM101B	0.882164	0.594361	0.623852	0.336049	NC	2.36649	3.42033	2.10818	3.16202	U	1.1754	0.612133	0.121562	-0.441705	NC	2.65973	2.09646	2.94753	2.38427	U
359948	IRF2BP2	-0.328744	-0.177396	-0.516117	-0.364769	NC	-3.05778	-4.74894	-3.24515	-4.93631	D	-0.800391	-0.220842	0.890771	1.47032	NC	-3.52942	-2.94987	-3.68077	-3.10122	D
3628	INPP1	0.0150937	0.197064	-0.107273	0.0746974	NC	-1.2981	-1.45912	-1.42047	-1.58148	D	-0.688056	-0.284334	-0.527043	-0.12332	NC	-2.00125	-1.59753	-2.18322	-1.7795	D
3641	INSL4	NA	NA	NA	NA	NA	9.41363	8.87036	9.41363	8.87036	U	-0.334143	-1.04294	0.20912	-0.499677	NC	9.07948	8.37069	9.07948	8.37069	U
3680	ITGA9	0	0	-1	-1	NC	3.80735	4.22239	2.80735	3.22239	U	0.874469	-0.304855	0.459432	-0.719892	NC	4.68182	3.5025	4.68182	3.5025	U
3684	ITGAM	0.736966	-0.584963	0	-1.32193	NC	7.68182	7.43741	6.94486	6.70044	U	0.672793	0.464532	0.917211	0.708951	NC	7.61765	7.40939	8.93958	8.73132	U
3700	ITIH4	-0.662965	-0.237943	-0.620152	-0.19513	NC	1.22961	1.39913	1.27242	1.44194	U	0.0320217	-0.641834	-0.137504	-0.811359	NC	1.92459	1.25074	1.49957	0.825715	U
3707	ITPKB	0.951816	0.72087	0.896043	0.665096	NC	-2.57447	-3.13456	-2.63024	-3.19033	D	0.0852473	-0.0641303	0.645335	0.495957	NC	-3.44104	-3.59042	-3.21009	-3.35947	D
3714	JAG2	0.0645241	-0.237132	-0.128929	-0.430585	NC	-1.49347	-1.34804	-1.68692	-1.54149	D	-0.568661	-0.618129	-0.714091	-0.76356	NC	-2.12666	-2.17612	-1.825	-1.87447	D
3725	JUN	0.677766	0.289191	0.369412	-0.0191627	NC	-2.48637	-2.97351	-2.79472	-3.28186	D	0	-0.0132121	0.487143	0.473931	NC	-3.16413	-3.17734	-2.77556	-2.78877	D
3726	JUNB	0.669646	0.336442	0.684026	0.350822	NC	-1.20948	-1.60733	-1.1951	-1.59295	D	0.0258802	0.107503	0.423731	0.505353	NC	-1.85325	-1.77163	-1.52004	-1.43842	D
374655	ZNF710	0.168939	0.087776	-0.0790821	-0.160245	NC	-2.34068	-3.49719	-2.5887	-3.74521	D	-0.425563	-0.337745	0.730942	0.81876	NC	-2.93518	-2.84737	-2.85402	-2.7662	D
374819	LRRC37A3	-0.320135	-0.0888093	-0.128515	0.102811	NC	2.00358	1.74983	2.1952	1.94145	U	0.138154	-0.433049	0.391911	-0.179292	NC	2.46187	1.89067	2.23055	1.65934	U
375033	PEAR1	0.263034	-0.234465	-0.222392	-0.719892	NC	2.66676	2.45943	2.18133	1.974	U	0.697816	0.351165	0.905141	0.55849	NC	3.10154	2.75489	3.59904	3.25239	U
375061	FAM89A	-0.0132561	0.0734978	-0.126799	-0.0400447	NC	-1.82729	-1.7683	-1.94083	-1.88184	D	0.209273	0.638226	0.15029	0.579243	NC	-1.60476	-1.1758	-1.69151	-1.26256	D
376940	ZC3H6	-0.597453	-0.903785	-0.0614005	-0.367732	NC	0.721963	1.32524	1.25802	1.86129	U	-0.204905	-0.0668748	-0.808182	-0.670152	NC	1.11451	1.25254	1.42084	1.55887	U
3787	KCNS1	0.736966	0	0.736966	0	NC	4	4.16993	4	4.16993	U	1.07325	0.681824	0.903324	0.511899	NC	4.33628	3.94486	5.07325	4.68182	U
382	ARF6	-0.212047	0.0349585	-0.251317	-0.00431084	NC	-1.79744	-2.15471	-1.83671	-2.19398	D	-0.132771	-0.038959	0.224501	0.318313	NC	-1.71816	-1.62435	-1.96517	-1.87135	D
3839	KPNA3	0.154886	0.185279	-0.435055	-0.404662	NC	-2.22882	-2.58496	-2.81876	-3.1749	D	-0.198381	0.426265	0.157762	0.782409	NC	-2.58209	-1.95744	-2.61248	-1.98783	D
384	ARG2	1.12875	1.35377	0.639792	0.864811	NC	2.2391	2.3867	1.75014	1.89774	U	0.772462	1.08993	0.624859	0.942327	NC	1.88281	2.20028	1.65779	1.97526	U
386627	SAP30L-AS1	0.137504	0.596234	-0.0530184	0.405712	NC	1.6102	2.21997	1.41968	2.02944	U	0.320259	0.324705	-0.289507	-0.285061	NC	1.79296	1.7974	1.33423	1.33867	U
387521	TMEM189	0.094938	0.0437861	0.115689	0.0645368	NC	-1.33609	-2.02461	-1.31534	-2.00386	D	-0.219885	-0.688512	0.468627	0	NC	-1.65092	-2.11954	-1.59976	-2.06839	D
387644	LINC00202-1	-1.13245	0.121306	-0.206451	1.04731	NC	2.15579	2.36187	3.08179	3.28787	U	0.324198	-0.0461702	0.118126	-0.252242	NC	3.61244	3.24207	2.35869	1.98832	U
387893	SETD8	-0.164409	-0.257487	0.243069	0.149991	NC	-1.41251	-1.76074	-1.00504	-1.35326	D	-0.415411	-0.525665	-0.0671821	-0.177436	NC	-1.66352	-1.77377	-1.57044	-1.68069	D
387914	SHISA2	-0.188762	0.190943	-0.255257	0.124447	NC	3.0253	2.61193	2.9588	2.54543	U	-0.474767	-0.420061	-0.0614005	-0.00669465	NC	2.73929	2.794	2.35959	2.41429	U
388228	SBK1	-0.40439	0.122857	0.280108	0.807355	NC	1.27633	1.75607	1.96083	2.44057	U	0.861172	-0.410632	0.381429	-0.890376	NC	2.54189	1.27009	2.01465	0.742842	U
388272	C16orf87	-0.0462442	0.54341	0.122543	0.712198	NC	-1.63591	-1.6079	-1.46713	-1.43911	D	-0.246161	0.360998	-0.274175	0.332983	NC	-1.83583	-1.22867	-2.42548	-1.81833	D
388394	RPRML	NA	NA	NA	NA	NA	7.47573	7.8392	7.47573	7.8392	U	0.0399664	0.00808235	-0.323504	-0.355388	NC	7.5157	7.48382	7.5157	7.48382	U
388531	RGS9BP	NA	NA	NA	NA	NA	2	2.32193	2	2.32193	U	1.16993	1	0.847997	0.678072	NC	3.16993	3	3.16993	3	U
388552	BLOC1S3	-0.603075	-0.343316	-0.332823	-0.0730635	NC	-1.62426	-1.73974	-1.35401	-1.46949	D	-0.275036	-0.506062	-0.159558	-0.390584	NC	-1.29622	-1.52725	-1.55598	-1.78701	D
388701	C1orf189	NA	NA	NA	NA	NA	6.53916	6.83289	6.53916	6.83289	U	0.306331	0.175087	0.0126	-0.118644	NC	6.84549	6.71425	6.84549	6.71425	U
388730	TMEM81	-1.08806	-0.499735	-1.33198	-0.74366	NC	1.2815	1.82085	1.03758	1.57693	U	-0.431398	-0.187356	-0.970746	-0.726704	NC	1.93816	2.1822	1.34984	1.59388	U
389152	PRR23C	-0.429251	-0.260914	0.158366	0.326703	NC	0.640458	1.25016	1.22807	1.83778	U	0.559792	0.524745	-0.0499095	-0.0849565	NC	1.6295	1.59445	1.46116	1.42612	U
389524	GTF2IRD2B	-0.19388	-0.1453	-0.341557	-0.292977	NC	1.84992	2.55587	1.70224	2.4082	U	-0.445717	0.0214089	-1.15168	-0.684551	NC	1.59808	2.0652	1.5495	2.01662	U
389549	FEZF1	NA	NA	NA	NA	NA	7.08746	8.23362	7.08746	8.23362	U	-0.133267	0.0924462	-1.27942	-1.05371	NC	6.9542	7.17991	6.9542	7.17991	U
389692	MAFA	0	1.58496	-1	0.584963	NC	7.29829	7.14771	6.29829	6.14771	U	-0.144486	-0.181428	0.00609161	-0.03085	NC	7.15381	7.11686	5.56884	5.5319	U
389741	GLIDR	-0.0673553	0.746049	-0.0469635	0.76644	NC	2.08239	1.8841	2.10278	1.90449	U	0.0677117	0.0539607	0.266003	0.252252	NC	2.21746	2.20371	1.40405	1.3903	U
3898	LAD1	-0.904479	-0.984695	-0.808289	-0.888505	NC	-3.83427	-5.18045	-3.73808	-5.08426	D	-0.901981	-0.910173	0.444195	0.436002	NC	-3.83177	-3.83996	-3.75156	-3.75975	D
389813	C9orf172	-0.026967	-0.947533	-0.421827	-1.34239	NC	2.11548	1.36405	1.72062	0.969194	U	-0.331206	0.372809	0.420218	1.12423	NC	1.81124	2.51525	2.7318	3.43582	U
390072	OR52N4	NA	NA	NA	NA	NA	3.70044	3.70044	3.70044	3.70044	U	0	-0.115477	0	-0.115477	NC	3.70044	3.58496	3.70044	3.58496	U
390595	UBAP1L	0	0.917538	-1	-0.0824622	NC	3.8635	3.78427	2.8635	2.78427	U	0.551539	0.694497	0.630766	0.773724	NC	4.41504	4.558	3.4975	3.64046	U
3930	LBR	0.90221	1.09693	0.405186	0.599901	NC	-2.15291	-2.13132	-2.64993	-2.62835	D	0.456133	1.10147	0.434546	1.07988	NC	-2.59899	-1.95365	-2.7937	-2.14837	D
3952	LEP	-0.678072	0.841302	-1	0.519374	NC	2.07325	2.69116	1.75132	2.36923	U	0.608575	0.212153	-0.00933787	-0.40576	NC	3.3599	2.96347	1.84052	1.4441	U
398	ARHGDIG	NA	NA	NA	NA	NA	6.14975	5.42626	6.14975	5.42626	U	-1.29177	-0.421827	-0.568284	0.301656	NC	4.85798	5.72792	4.85798	5.72792	U
3984	LIMK1	0.0193406	0.0661445	0.147234	0.194037	NC	-1.47177	-2.03757	-1.34388	-1.90968	D	0.269022	-0.218968	0.834825	0.346835	NC	-1.22209	-1.71008	-1.26889	-1.75688	D
399664	MEX3D	-0.176832	-0.292808	-0.21243	-0.328406	NC	-2.25058	-2.46208	-2.28618	-2.49768	D	-0.846988	0.111592	-0.635484	0.323096	NC	-2.92074	-1.96216	-2.80476	-1.84618	D
399665	FAM102A	0.431988	0.384552	0.395724	0.348289	NC	2.29117	1.31878	2.25491	1.28251	U	-0.219537	-0.489076	0.752861	0.483322	NC	1.63965	1.37011	1.68709	1.41755	U
399833	SPRNP1	-0.125531	0.415037	-0.540568	0	NC	3.11548	3.67243	2.70044	3.25739	U	-0.452512	0.106915	-1.00946	-0.450033	NC	2.7885	3.34792	2.24793	2.80735	U
400043	LOC400043	-0.251836	-0.154782	-0.0778068	0.0192479	NC	-1.68182	-2.61334	-1.50779	-2.43931	D	-0.0100537	-0.186931	0.921467	0.744589	NC	-1.44004	-1.61692	-1.5371	-1.71397	D
400058	MKRN9P	NA	NA	NA	NA	NA	4.08746	5.45943	4.08746	5.45943	U	0.4975	-0.280108	-0.874469	-1.65208	NC	4.58496	3.80735	4.58496	3.80735	U
400073	C12orf76	0.212545	-0.0465426	0.517399	0.258312	NC	1.49845	1.63005	1.80331	1.9349	U	0.449079	0	0.317482	-0.131597	NC	1.73499	1.28591	1.99408	1.545	U
400451	FAM174B	0.481271	0.0891705	0.172963	-0.219138	NC	-2.46428	-2.72732	-2.77259	-3.03562	D	0.49304	0.784271	0.756074	1.04731	NC	-2.45251	-2.16128	-2.06041	-1.76918	D
400506	KNOP1	-0.17758	-0.192458	0.29577	0.280892	NC	-2.66617	-1.84268	-2.19282	-1.36933	D	0.731417	0.250985	-0.0920666	-0.572499	NC	-1.75717	-2.2376	-1.74229	-2.22272	D
400558	LOC400558	NA	NA	NA	NA	NA	4.90689	5.90689	4.90689	5.90689	U	1.02385	0.302563	0.0238467	-0.697437	NC	5.93074	5.20945	5.93074	5.20945	U
400579	FLJ35934	0.563901	-0.131245	0	-0.695145	NC	2.23133	2.81629	1.66742	2.25239	U	-0.0544478	-0.279154	-0.63941	-0.864117	NC	1.61298	1.38827	2.30812	2.08342	U
400612	LOC400612	-0.226592	-0.207096	0.740241	0.759737	NC	1.56242	1.981	2.52925	2.94784	U	0.443857	-0.127598	0.0252741	-0.546181	NC	2.23287	1.66141	2.21337	1.64192	U
400684	LOC400684	1.18442	0.932886	0.943416	0.691878	NC	3.32193	2.65951	3.08092	2.4185	U	0.207325	-0.389042	0.869744	0.273376	NC	2.34483	1.74846	2.59637	2	U
400709	SIGLEC16	NA	NA	NA	NA	NA	6.26679	4.90689	6.26679	4.90689	U	-0.62293	-1.56635	0.736966	-0.206451	NC	5.64386	4.70044	5.64386	4.70044	U
400818	NBPF9	0.141438	0.149834	0.190775	0.199171	NC	-2.36169	-1.70768	-2.31235	-1.65834	D	1.20716	1.04953	0.553154	0.395524	NC	-1.29597	-1.4536	-1.30436	-1.46199	D
401027	C2orf66	-0.756729	-1.02975	0.398549	0.125531	NC	0.661415	1.45138	1.81669	2.60666	U	0.569366	0.286118	-0.220599	-0.503847	NC	1.98751	1.70426	2.26053	1.97728	U
401149	LINC01061	1.078	0.72316	0.382857	0.0280144	NC	2.38904	1.88691	1.6939	1.19176	U	0.519374	0.141472	1.02151	0.643608	NC	1.83041	1.45251	2.18526	1.80735	U
402317	OR2A42	NA	NA	NA	NA	NA	3.45943	4.64386	3.45943	4.64386	U	0.862496	2.03242	-0.321928	0.847997	NC	4.32193	5.49185	4.32193	5.49185	U
404550	C16orf74	-0.0341441	-0.109407	0.268545	0.193282	NC	-2.14551	-2.39792	-1.84282	-2.09523	D	0.358332	0.159903	0.610742	0.412313	NC	-1.75304	-1.95147	-1.67777	-1.8762	D
4065	LY75	-0.0671142	-0.137504	0.485427	0.415037	NC	1.51785	1.8625	2.07039	2.41504	U	0.652077	0.152003	0.307429	-0.192645	NC	2.23704	1.73697	2.30743	1.80735	U
406991	MIR21	-0.558365	-0.192216	-1.14576	-0.77961	NC	-2.24214	-2.22196	-2.82954	-2.80936	D	-0.963881	-1.08797	-0.984058	-1.10815	NC	-2.64766	-2.77175	-3.01381	-3.1379	D
4082	MARCKS	-0.29442	-0.125999	-0.521324	-0.352904	NC	-3.18918	-4.05473	-3.41609	-4.28164	D	0.33927	0.246161	1.20482	1.11171	NC	-2.55549	-2.6486	-2.72391	-2.81702	D
4107	MAGEA8	NA	NA	NA	NA	NA	4.39232	5.42626	4.39232	5.42626	U	1.25154	0.308122	0.217591	-0.725825	NC	5.64386	4.70044	5.64386	4.70044	U
4126	MANBA	0.111031	0.501194	-0.519087	-0.128925	NC	2.39126	2.36737	1.76114	1.73725	U	-0.059599	-0.191558	-0.0357099	-0.167669	NC	2.22063	2.08867	1.83047	1.69851	U
4130	MAP1A	0.321928	2.32193	-0.847997	1.152	NC	5.24793	4.32193	4.078	3.152	U	-0.192645	-0.506461	0.733354	0.419539	NC	4.73335	4.41954	2.73335	2.41954	U
4139	MARK1	0.144705	0.567206	-0.30143	0.121071	NC	-1.93529	-2.68072	-2.38143	-3.12686	D	-0.373458	0.049753	0.371969	0.79518	NC	-2.45346	-2.03025	-2.87596	-2.45275	D
4143	MAT1A	0.345209	0.0103173	0.15775	-0.177141	NC	-2.26442	-1.96589	-2.45187	-2.15335	D	0.869939	0.675998	0.571416	0.377474	NC	-1.73969	-1.93363	-1.40479	-1.59874	D
415116	PIM3	0.0428666	-0.0481202	0.0367729	-0.0542139	NC	-1.46843	-1.89833	-1.47452	-1.90442	D	-0.0559922	-0.0106003	0.373908	0.4193	NC	-1.56729	-1.5219	-1.4763	-1.43091	D
4157	MC1R	0.659576	-0.196589	0.553317	-0.302847	NC	1.92697	2.20323	1.82071	2.09697	U	0.374603	0.159956	0.0983379	-0.116309	NC	1.64199	1.42735	2.49816	2.28351	U
4168	MCF2	-0.152003	-0.736966	1.16993	0.584963	NC	3.1375	3.45943	4.45943	4.78136	U	-0.652077	-0.552541	-0.974005	-0.874469	NC	2.63743	2.73697	3.22239	3.32193	U
417	ART1	NA	NA	NA	NA	NA	3.32193	4.32193	3.32193	4.32193	U	2	-0.152003	1	-1.152	NC	5.32193	3.16993	5.32193	3.16993	U
4172	MCM3	0.625858	0.431553	0.602842	0.408536	NC	-2.22803	-1.87096	-2.25104	-1.89397	D	0.942032	0.96246	0.584963	0.60539	NC	-1.91185	-1.89143	-1.71755	-1.69712	D
4188	MDFI	0.18108	0.111561	0.382441	0.312922	NC	-2.96857	-3.07357	-2.76721	-2.87221	D	0.905469	0.452307	1.01047	0.55731	NC	-2.24418	-2.69734	-2.17466	-2.62782	D
4213	MEIS3P1	1.1375	1.48543	-0.788496	-0.440573	NC	-2.32193	-2.32193	-4.24793	-4.24793	D	NA	NA	NA	NA	NA	-3.45943	-3.45943	-3.80735	-3.80735	D
4234	METTL1	-0.903281	-0.603586	-0.829737	-0.530042	NC	-2.8712	-2.94053	-2.79765	-2.86698	D	-0.352932	-0.530985	-0.2836	-0.461653	NC	-2.32085	-2.4989	-2.62054	-2.7986	D
4246	SCGB2A1	NA	NA	NA	NA	NA	4.70044	4.75489	4.70044	4.75489	U	0.0544478	-0.0565835	0	-0.111031	NC	4.75489	4.64386	4.75489	4.64386	U
4277	MICB	0.402983	0.518714	0.244012	0.359744	NC	2.68745	2.1526	2.52848	1.99363	U	-0.226237	-0.414812	0.308613	0.120039	NC	2.05823	1.86966	1.9425	1.75393	U
433	ASGR2	NA	NA	NA	NA	NA	3.16993	3.45943	3.16993	3.45943	U	1.078	-0.169925	0.788496	-0.459432	NC	4.24793	3	4.24793	3	U
4336	MOBP	-0.68147	0	-0.154723	0.526748	NC	3.5035	3.09443	4.03025	3.62118	U	0.932601	0.0701042	1.34166	0.479168	NC	5.11757	4.25507	4.4361	3.5736	U
4356	MPP3	-0.655459	-0.496867	-0.282099	-0.123507	NC	-2.80521	-3.3678	-2.43185	-2.99444	D	-0.764784	-0.435215	-0.202189	0.127379	NC	-2.91453	-2.58496	-3.07312	-2.74355	D
4360	MRC1	NA	NA	NA	NA	NA	5.39232	6.78136	5.39232	6.78136	U	1.5025	1.17754	0.113458	-0.211504	NC	6.89482	6.56986	6.89482	6.56986	U
439949	PRKCQ-AS1	-0.0962153	-0.146841	0.281632	0.231006	NC	-2.23799	-2.85466	-1.86014	-2.47681	D	0.257798	0.605721	0.874469	1.22239	NC	-1.88398	-1.53605	-1.83335	-1.48543	D
440044	SLC22A20	-0.616671	-0.786596	-0.236067	-0.405992	NC	1.03103	1.46133	1.41163	1.84194	U	0.155069	0.0303736	-0.275235	-0.399931	NC	1.80277	1.67807	1.97269	1.848	U
440077	ZNF705A	NA	NA	NA	NA	NA	4.85798	5.88264	4.85798	5.88264	U	1.49957	0.142019	0.474909	-0.882643	NC	6.35755	5	6.35755	5	U
440104	TMEM198B	0.364526	0.074881	0.291166	0.00152103	NC	1.73825	1.89542	1.66489	1.82206	U	0.15373	-0.223833	-0.0034473	-0.38101	NC	1.52745	1.14989	1.81709	1.43953	U
440193	CCDC88C	0.184272	-0.25163	-0.0672669	-0.503168	NC	-3.07039	-2.90403	-3.32193	-3.15557	D	0.263034	0.137504	0.096676	-0.0288549	NC	-2.99163	-3.11716	-2.55573	-2.68126	D
440518	GOLGA2P9	1	0	1	0	NC	-2.58496	-2.58496	-2.58496	-2.58496	D	NA	NA	NA	NA	NA	-3.58496	-3.58496	-2.58496	-2.58496	D
440567	UQCRHL	NA	NA	NA	NA	NA	8.20457	6.39232	8.20457	6.39232	U	-2.1822	-0.947183	-0.36995	0.86507	NC	6.02237	7.25739	6.02237	7.25739	U
440900	LINC01191	NA	NA	NA	NA	NA	6.26679	6.9542	6.26679	6.9542	U	0.0369942	-0.408806	-0.650416	-1.09622	NC	6.30378	5.85798	6.30378	5.85798	U
441027	TMEM150C	-0.423211	-1.23879	0.758992	-0.0565835	NC	1.65652	1.31703	2.83872	2.49923	U	0.569366	-1.03136	0.908852	-0.691878	NC	2.64909	1.04836	3.46467	1.86394	U
441108	C5orf56	-0.0473057	0.952694	0.383329	1.38333	NC	2.82388	2.7323	3.25452	3.16294	U	0.137802	-0.0880792	0.229379	0.00349744	NC	3.00899	2.78311	2.00899	1.78311	U
441478	NRARP	-0.736966	-0.573907	-0.597241	-0.434183	NC	3.59173	2.98326	3.73145	3.12298	U	-0.492563	-0.656994	0.115909	-0.0485225	NC	3.83613	3.6717	3.67307	3.50864	U
442211	ATP6V0CP3	NA	NA	NA	NA	NA	5.45943	6.06609	5.45943	6.06609	U	1.03242	1.49476	0.425764	0.888107	NC	6.49185	6.9542	6.49185	6.9542	U
442245	GSTM2P1	NA	NA	NA	NA	NA	4.64386	5.20945	4.64386	5.20945	U	0.604071	-0.120294	0.0384741	-0.685891	NC	5.24793	4.52356	5.24793	4.52356	U
442721	LMOD2	0.874469	-0.263034	0.874469	-0.263034	NC	1.58496	3.32193	1.58496	3.32193	U	0.415037	0.63743	-1.32193	-1.09954	NC	1.12553	1.34792	2.26303	2.48543	U
4430	MYO1B	0.656699	0.759429	0.221361	0.324091	NC	-1.82816	-2.20897	-2.2635	-2.64431	D	-0.0710008	0.188372	0.309805	0.569178	NC	-2.55586	-2.29649	-2.65859	-2.39922	D
4436	MSH2	0.62293	0.68578	0.0407185	0.103568	NC	-1.59323	-2.04182	-2.17544	-2.62403	D	-1.02509	-0.214125	-0.576501	0.234465	NC	-3.24125	-2.43029	-3.3041	-2.49313	D
4485	MST1	-1.1861	-0.399803	-1.65303	-0.866733	NC	1.7525	2.04523	1.28557	1.5783	U	-0.698396	-0.392488	-0.991122	-0.685214	NC	2.2402	2.54611	1.45391	1.75982	U
4493	MT1E	0.340043	0.57631	0.816231	1.0525	NC	-1.81959	-1.69917	-1.3434	-1.22298	D	0.667853	0.978849	0.547433	0.858429	NC	-1.49178	-1.18078	-1.72805	-1.41705	D
4542	MYO1F	-1.35364	-0.938599	-1	-0.584963	NC	1.17688	1.60572	1.53051	1.95936	U	-1.11548	0.106915	-1.54432	-0.321928	NC	1.41504	2.63743	1	2.22239	U
4598	MVK	0.0426593	-0.131024	0.237736	0.0640534	NC	-1.75199	-1.69581	-1.55691	-1.50073	D	-0.142199	0.282863	-0.198381	0.22668	NC	-1.93685	-1.51179	-1.76317	-1.3381	D
4616	GADD45B	0.32394	0.361638	-0.245845	-0.208147	NC	3.42478	3.54053	2.855	2.97074	U	-0.296649	-0.22169	-0.412397	-0.337437	NC	2.80419	2.87915	2.76649	2.84145	U
4621	MYH3	0	0	0	0	NA	1.80735	3.24793	1.80735	3.24793	U	1.56188	1.09954	0.121306	-0.341037	NC	3.36923	2.90689	3.36923	2.90689	U
463	ZFHX3	-0.15917	-0.460914	-0.594386	-0.896129	NC	-1.73471	-2.25089	-2.16993	-2.68611	D	-0.135814	-0.356144	0.38037	0.16004	NC	-1.71135	-1.93168	-1.40961	-1.62994	D
4653	MYOC	NA	NA	NA	NA	NA	6.45943	6.37504	6.45943	6.37504	U	-0.758992	-0.309684	-0.6746	-0.225292	NC	5.70044	6.14975	5.70044	6.14975	U
4665	NAB2	-0.259005	-0.404984	-0.00361729	-0.149597	NC	-2.2578	-2.63005	-2.00241	-2.37466	D	-0.353637	-0.449215	0.0186157	-0.076962	NC	-2.35243	-2.44801	-2.20645	-2.30203	D
4682	NUBP1	-0.222807	-0.319598	0.352549	0.255758	NC	-1.94389	-2.01249	-1.36854	-1.43714	D	0.136851	-0.227586	0.205447	-0.15899	NC	-1.58424	-1.94867	-1.48745	-1.85188	D
4690	NCK1	-0.155651	-0.114248	-0.204014	-0.162611	NC	-1.80982	-2.39766	-1.85818	-2.44602	D	-0.292063	0.0999188	0.295776	0.687758	NC	-1.94623	-1.55425	-1.98763	-1.59565	D
4773	NFATC2	-1	-1	-1	-1	NC	3.9542	3.52356	3.9542	3.52356	U	-0.561879	-1.14684	-0.131245	-0.716207	NC	4.39232	3.80735	4.39232	3.80735	U
4780	NFE2L2	0.528914	0.877572	-0.544938	-0.19628	NC	-0.427472	-1.6014	-1.50132	-2.67525	D	-1.40574	-0.319682	-0.231816	0.854245	NC	-2.36213	-1.27607	-2.71079	-1.62473	D
4792	NFKBIA	0.514458	0.493338	0.717984	0.696864	NC	-2.61665	-2.85488	-2.41312	-2.65135	D	-0.493989	-0.191762	-0.255761	0.0464654	NC	-3.6251	-3.32287	-3.60398	-3.30175	D
4798	NFRKB	0.795908	0.33456	0.520986	0.0596377	NC	-1.39002	-2.09516	-1.66494	-2.37008	D	0.408318	0.412353	1.11346	1.11749	NC	-1.77761	-1.77357	-1.31626	-1.31222	D
4807	NHLH1	-0.711655	-0.161967	0.408085	0.957772	NC	2.14272	2.30135	3.26246	3.42109	U	0.00864755	-0.337187	-0.14999	-0.495825	NC	2.86302	2.51718	2.31333	1.9675	U
481	ATP1B1	0.375566	0.975197	0.434118	1.03375	NC	2.85572	3.05067	2.91427	3.10923	U	-0.468092	-0.366296	-0.663047	-0.561251	NC	2.01206	2.11386	1.41243	1.51423	U
482	ATP1B2	-0.153992	-0.852774	0.385493	-0.313289	NC	1.39855	1.56797	1.93803	2.10746	U	0.447459	-0.0934109	0.278037	-0.262833	NC	2	1.45913	2.69878	2.15791	U
4843	NOS2	NA	NA	NA	NA	NA	4.9542	3.58496	4.9542	3.58496	U	-0.954196	-1.78427	0.415037	-0.415037	NC	4	3.16993	4	3.16993	U
4880	NPPC	NA	NA	NA	NA	NA	8.01681	8.03342	8.01681	8.03342	U	-0.0684411	-0.0919958	-0.0850558	-0.10861	NC	7.94837	7.92481	7.94837	7.92481	U
491	ATP2B2	NA	NA	NA	NA	NA	2.58496	2.58496	2.58496	2.58496	U	0.736966	-1	0.736966	-1	NC	3.32193	1.58496	3.32193	1.58496	U
4929	NR4A2	-0.882931	-1.29091	-0.630214	-1.0382	NC	-2.30933	-2.34395	-2.05661	-2.09124	D	-0.994309	-0.638698	-0.959683	-0.604071	NC	-2.42071	-2.0651	-2.01272	-1.65711	D
493861	EID3	-0.658263	-0.532733	-1.24544	-1.11991	NC	-5.59163	-5.59163	-6.1788	-6.1788	D	0	0.917538	0	0.917538	NC	-4.93336	-4.01582	-5.05889	-4.14136	D
493900	TMEM9B-AS1	1.09818	0.190103	0.618571	-0.289507	NC	1.9001	1.84461	1.42049	1.365	U	0.724939	0.972519	0.780434	1.02801	NC	1.52686	1.77444	2.43494	2.68252	U
4942	OAT	-0.12281	-0.0190458	-0.30199	-0.198226	NC	1.84639	2.08285	1.66721	1.90367	U	-0.284918	-0.0386598	-0.521377	-0.275119	NC	1.68428	1.93054	1.58052	1.82678	U
494513	DFNB59	-0.29956	-0.630766	0.285402	-0.0458037	NC	1.08746	2.48113	1.67243	3.06609	U	0.0418202	0.719892	-1.35184	-0.673772	NC	1.42884	2.10692	1.76005	2.43812	U
4988	OPRM1	-0.36257	-0.667425	0.453718	0.148863	NC	0.991067	1.20704	1.80735	2.02333	U	0.437267	-0.222392	0.22129	-0.43837	NC	1.7909	1.13124	2.09576	1.4361	U
4999	ORC2	0.250795	0.274556	0.0220423	0.0458037	NC	-1.73366	-1.84503	-1.96242	-2.07378	D	0.638901	0.479526	0.750262	0.590887	NC	-1.34556	-1.50493	-1.36932	-1.52869	D
5001	ORC5	0.499135	1.03962	0.542637	1.08313	NC	-1.80646	-1.78169	-1.76296	-1.73819	D	1.01862	1.15948	0.993848	1.13471	NC	-1.28698	-1.14612	-1.82747	-1.68661	D
5013	OTX1	0.557592	0.655963	0.749625	0.847997	NC	-1.76725	-2.3966	-1.57521	-2.20457	D	0.710493	0.540568	1.33985	1.16993	NC	-1.61435	-1.78427	-1.71272	-1.88264	D
5029	P2RY2	-0.436603	-0.608702	-0.224873	-0.396973	NC	-2.07468	-1.50179	-1.86295	-1.29006	D	0.378512	-0.0365259	-0.194378	-0.609416	NC	-1.25956	-1.6746	-1.08746	-1.5025	D
5036	PA2G4	-0.0948494	-0.0430775	0.026012	0.0777839	NC	-1.32207	-1.28771	-1.20121	-1.16685	D	0.0653361	0.0271272	0.0309782	-0.00723068	NC	-1.16189	-1.2001	-1.21366	-1.25187	D
50615	IL21R	-0.521953	0.321928	-0.621488	0.222392	NC	1.48727	1.96083	1.38773	1.86129	U	0.676923	0.275235	0.203359	-0.198329	NC	2.68614	2.28445	1.84226	1.44057	U
50628	GEMIN4	-0.0676129	-0.294797	-0.113593	-0.340777	NC	-1.58496	-1.57293	-1.63094	-1.61891	D	0.28025	-0.0145728	0.268218	-0.0266054	NC	-1.2371	-1.53192	-1.00992	-1.30474	D
5083	PAX9	-0.109804	-0.490894	-0.179706	-0.560796	NC	-1.77032	-2.20095	-1.84022	-2.27085	D	-0.0593785	-0.668794	0.371256	-0.23816	NC	-1.71989	-2.32931	-1.3388	-1.94822	D
5089	PBX2	0.587993	0.279438	0.51047	0.201915	NC	-1.12843	-2.15859	-1.20595	-2.23612	D	-0.15477	-0.17148	0.875392	0.858682	NC	-1.87119	-1.8879	-1.56264	-1.57935	D
5099	PCDH7	0.414052	0.30235	0.105323	-0.00637891	NC	-1.13777	-1.43178	-1.44649	-1.74051	D	0.0427285	0.0539123	0.33674	0.347923	NC	-1.50909	-1.49791	-1.39739	-1.3862	D
51010	EXOSC3	0.017449	0.507374	-0.0465426	0.443382	NC	-1.52556	-1.53016	-1.58955	-1.59415	D	0.334736	0.730519	0.339338	0.735121	NC	-1.20827	-0.812488	-1.6982	-1.30241	D
51031	GLOD4	0.321928	0.402513	0.430261	0.510846	NC	-1.23808	-1.32385	-1.12975	-1.21552	D	0.0740911	0.188113	0.159858	0.273879	NC	-1.48592	-1.3719	-1.5665	-1.45248	D
51042	ZNF593	-0.508026	-0.575933	-0.309705	-0.377612	NC	-1.87675	-1.41266	-1.67843	-1.21434	D	0.0140752	-0.0670144	-0.450016	-0.531106	NC	-1.35465	-1.43574	-1.28675	-1.36783	D
51043	ZBTB7B	0.163334	-0.0517825	0.209853	-0.0052627	NC	-2.32888	-3.38333	-2.28236	-3.33681	D	-0.245026	-0.448727	0.809421	0.605721	NC	-2.73724	-2.94094	-2.52212	-2.72583	D
51053	GMNN	0.523299	0.388384	1.01761	0.882691	NC	-2.87112	-2.77158	-2.37681	-2.27728	D	1.03634	0.985203	0.936806	0.885667	NC	-2.35808	-2.40922	-2.22316	-2.2743	D
51078	THAP4	-0.179783	-0.236109	-0.0645034	-0.120829	NC	-1.20959	-1.611	-1.09431	-1.49572	D	-0.512619	-0.485536	-0.111205	-0.0841221	NC	-1.54242	-1.51534	-1.4861	-1.45901	D
51092	SIDT2	-0.647211	-0.609541	-1.18259	-1.14492	NC	2.16123	1.81153	1.62585	1.27615	U	-0.861902	-1.04089	-0.512195	-0.691184	NC	1.94654	1.76755	1.90887	1.72988	U
51096	UTP18	-0.366428	-0.0282032	-0.477602	-0.139377	NC	-2.67846	-2.89061	-2.78963	-3.00178	D	0.157541	0.217098	0.369695	0.429251	NC	-2.15449	-2.09493	-2.49271	-2.43316	D
51101	ZC2HC1A	-0.0893991	-0.279224	0	-0.189825	NC	-2.22033	-1.81979	-2.13093	-1.73039	D	-0.217591	0.111031	-0.618129	-0.289507	NC	-2.34852	-2.0199	-2.1587	-1.83007	D
51112	TRAPPC12	0.112826	0.0223138	0.077425	-0.0130873	NC	-1.28071	-1.60264	-1.31611	-1.63804	D	-0.251132	0.173525	0.0707958	0.495453	NC	-1.64467	-1.22001	-1.55416	-1.1295	D
51123	ZNF706	-0.0915634	0.0363894	0.245112	0.373065	NC	-1.5499	-1.64915	-1.21323	-1.31248	D	0.0568141	0.324324	0.156064	0.423574	NC	-1.40153	-1.13402	-1.52948	-1.26197	D
51129	ANGPTL4	0.913342	0.816746	1.01155	0.91495	NC	-2.80402	-2.96719	-2.70581	-2.86898	D	0.0275801	0.0112448	0.190748	0.174412	NC	-3.68978	-3.70612	-3.59318	-3.60952	D
51149	C5orf45	0.340729	0.0916484	0.219781	-0.0292998	NC	2.03747	2.18709	1.91653	2.06614	U	-0.0328096	-0.231957	-0.18242	-0.381568	NC	1.66394	1.46479	1.91302	1.71387	U
51151	SLC45A2	NA	NA	NA	NA	NA	5.20945	5.04439	5.20945	5.04439	U	-0.302563	0.182864	-0.137504	0.347923	NC	4.90689	5.39232	4.90689	5.39232	U
51155	HN1	-0.156253	-0.0870083	-0.1453	-0.076055	NC	1.28961	1.824	1.30057	1.83495	U	-0.122722	0.0559703	-0.657107	-0.478414	NC	1.32314	1.50184	1.2539	1.43259	U
51166	AADAT	0.118181	0.340574	-0.0267669	0.195626	NC	-1.31316	-1.62059	-1.45811	-1.76553	D	-0.901436	-1.23704	-0.594008	-0.929611	NC	-2.33278	-2.66838	-2.55517	-2.89077	D
51168	MYO15A	-0.678072	-0.415037	-0.847997	-0.584963	NC	2.88264	2.85798	2.71272	2.68806	U	0.962847	0.439285	0.987509	0.463947	NC	4.52356	4	4.26053	3.73697	U
51176	LEF1	0.180572	0.124755	-0.160465	-0.216282	NC	-2.93035	-2.65163	-3.27139	-2.99267	D	0.391191	0.135352	0.112475	-0.143364	NC	-2.71973	-2.97557	-2.66391	-2.91975	D
51193	ZNF639	0.106357	0.1145	-0.101591	-0.0934477	NC	-2.29005	-2.15777	-2.498	-2.36571	D	0.22512	0.221027	0.092837	0.0887442	NC	-2.17129	-2.17538	-2.17943	-2.18352	D
51196	PLCE1	-0.584963	0	0	0.584963	NC	2.11548	1	2.70044	1.58496	U	0.387023	-0.241008	1.5025	0.874469	NC	3.08746	2.45943	2.5025	1.87447	U
51236	HGH1	0.33187	0.199464	0.532209	0.399803	NC	-1.48045	-2.44868	-1.28011	-2.24834	D	0.115683	-0.41593	1.08392	0.552303	NC	-1.69663	-2.22825	-1.56423	-2.09584	D
5125	PCSK5	-0.415037	0.321928	-1	-0.263034	NC	3.14296	2.8413	2.558	2.25634	U	0.0922585	-0.158065	0.393914	0.143591	NC	3.65025	3.39993	2.91329	2.66297	U
51260	PBDC1	-0.525979	-0.236891	-0.401638	-0.11255	NC	-1.61465	-1.35162	-1.49031	-1.22727	D	-0.074258	-0.54636	-0.337292	-0.809394	NC	-1.16293	-1.63503	-1.45202	-1.92412	D
51265	CDKL3	-0.747613	0.556393	0.816288	2.12029	NC	2.15333	2.36169	3.71723	3.92559	U	-0.0534393	-0.201872	-0.261797	-0.41023	NC	2.8475	2.69907	1.5435	1.39506	U
51268	PIPOX	-0.878009	-0.229482	0.509014	1.15754	NC	1.33039	1.46713	2.71741	2.85415	U	0.204199	-0.446309	0.067463	-0.583045	NC	2.4126	1.76209	1.76407	1.11356	U
51278	IER5	0.746527	0.884031	0.647434	0.784938	NC	1.84595	2.09478	1.74685	1.99569	U	0.127241	0.603861	-0.121594	0.355026	NC	1.22666	1.70328	1.08916	1.56578	U
51289	RXFP3	NA	NA	NA	NA	NA	3.90689	2.32193	3.90689	2.32193	U	1.04731	-0.584963	2.63227	1	NC	4.9542	3.32193	4.9542	3.32193	U
51315	KRCC1	-0.288626	-0.0690028	-0.264647	-0.0450239	NC	1.4752	1.57701	1.49918	1.60099	U	-0.362774	-0.0972972	-0.464589	-0.199112	NC	1.40105	1.66653	1.18143	1.4469	U
51332	SPTBN5	0.847997	0.201634	0.847997	0.201634	NC	1.76553	2.21723	1.76553	2.21723	U	0.504994	0.270089	0.0532982	-0.181607	NC	1.42253	1.18763	2.0689	1.83399	U
51337	THEM6	0.649798	0.448386	0.648408	0.446996	NC	-2.59194	-2.95211	-2.59333	-2.9535	D	-0.226592	0.0494687	0.133583	0.409644	NC	-3.46833	-3.19227	-3.26691	-2.99085	D
51339	DACT1	NA	NA	NA	NA	NA	7.17991	7.11894	7.17991	7.11894	U	-0.0403577	-0.479469	0.0206103	-0.418501	NC	7.13955	6.70044	7.13955	6.70044	U
51361	HOOK1	-0.244734	-0.173767	-0.798669	-0.727703	NC	-1.19704	-2.03103	-1.75097	-2.58496	D	-0.638734	-0.466781	0.195256	0.367209	NC	-1.59104	-1.41908	-1.662	-1.49005	D
51406	NOL7	0.0916305	0.210731	0.120747	0.239847	NC	-1.41701	-2.455	-1.38789	-2.42589	D	-0.539313	-0.301839	0.498681	0.736155	NC	-2.04795	-1.81048	-2.16705	-1.92958	D
51422	PRKAG2	-0.659298	-0.641801	-0.7538	-0.736303	NC	-1.2001	-1.67193	-1.2946	-1.76643	D	-0.993915	-0.754964	-0.522083	-0.283131	NC	-1.53471	-1.29576	-1.55221	-1.31326	D
51444	RNF138	0.0297065	0.329512	-0.194114	0.105691	NC	-1.98606	-2.08446	-2.20988	-2.30829	D	0.0921182	0.805088	0.190522	0.903492	NC	-1.92365	-1.21068	-2.22345	-1.51048	D
51460	SFMBT1	1.16753	0.66862	0.40073	-0.0981804	NC	-1.3112	-1.97863	-2.078	-2.74543	D	-0.397335	0.245112	0.270089	0.912537	NC	-2.87607	-2.23362	-2.37716	-1.73471	D
51477	ISYNA1	-0.0268416	-0.0820711	0.595158	0.539929	NC	3.04339	3.57886	3.66539	4.20086	U	-0.11058	-0.577322	-0.646049	-1.11279	NC	2.95965	2.49291	3.01488	2.54814	U
51517	NCKIPSD	0.642106	0.359896	0.713808	0.431597	NC	-1.57842	-2.37764	-1.50672	-2.30594	D	0.401922	0.28356	1.20114	1.08278	NC	-1.8186	-1.93697	-1.53639	-1.65476	D
51533	PHF7	-0.0356239	0.22741	0.540568	0.803603	NC	1.53727	1.75097	2.11346	2.32716	U	0.784662	0.436099	0.570956	0.222392	NC	2.35755	2.00899	2.09452	1.74595	U
5154	PDGFA	-0.3544	-0.00972607	-0.234	0.110674	NC	-3.31066	-3.29472	-3.19026	-3.17432	D	0.0317089	0.215506	0.0157673	0.199564	NC	-2.92455	-2.74076	-3.26923	-3.08543	D
51545	ZNF581	0.33801	0.308675	0.557037	0.527702	NC	-1.54405	-1.39952	-1.32503	-1.18049	D	0.00464637	0.230348	-0.139891	0.0858108	NC	-1.87742	-1.65172	-1.84808	-1.62238	D
51561	IL23A	-0.459432	0.0785334	0.530515	1.06848	NC	1.58496	1.605	2.57491	2.59495	U	0.503094	0.283072	0.483056	0.263034	NC	2.54749	2.32747	2.00952	1.7895	U
51585	PCF11	-0.177473	0.0772819	-0.0516932	0.203062	NC	1.76731	1.5263	1.89308	1.65208	U	0.192444	0.214097	0.433452	0.455105	NC	2.13722	2.15888	1.88247	1.90412	U
51593	SRRT	-0.10558	-0.141586	0.221182	0.185175	NC	-1.58303	-1.36167	-1.25627	-1.03491	D	-0.0366	-0.360197	-0.25796	-0.581557	NC	-1.51405	-1.83765	-1.47805	-1.80164	D
51621	KLF13	0.18537	-0.115208	-0.0510824	-0.351661	NC	-1.73912	-2.77546	-1.97557	-3.01191	D	-0.896164	-0.388957	0.140178	0.647385	NC	-2.82065	-2.31344	-2.52007	-2.01287	D
51651	PTRH2	-0.347306	-0.122579	0.0345147	0.259241	NC	-2.53462	-2.44991	-2.1528	-2.06809	D	0.402213	0.304804	0.317507	0.220097	NC	-1.7851	-1.88251	-2.00983	-2.10724	D
5167	ENPP1	-0.61471	0.243271	-0.459432	0.398549	NC	1.63322	1.30415	1.7885	1.45943	U	0.227806	-0.0482552	0.55687	0.280809	NC	2.47573	2.19967	1.61775	1.34169	U
51678	MPP6	-0.488695	-0.353274	-0.592576	-0.457155	NC	-3.11548	-2.29605	-3.21936	-2.39993	D	0.667425	0.866733	-0.152003	0.0473057	NC	-1.95936	-1.76005	-2.09478	-1.89547	D
5172	SLC26A4	1.0614	1.04629	0.356144	0.341037	NC	2.23799	2.43644	1.53273	1.73118	U	0.750201	0.664714	0.551751	0.466263	NC	1.92679	1.8413	1.9419	1.85641	U
51728	POLR3K	-0.696794	-0.310081	-0.648407	-0.261693	NC	-3.38154	-1.45376	-3.33316	-1.40538	D	0.942515	1.82018	-0.985263	-0.107599	NC	-1.74223	-0.86457	-2.12895	-1.25128	D
5195	PEX14	-0.0436269	-0.196333	0.0541558	-0.0985506	NC	-1.60973	-1.69462	-1.51195	-1.59684	D	0.234653	0.10999	0.319542	0.194879	NC	-1.33145	-1.45611	-1.17874	-1.30341	D
5268	SERPINB5	-0.839056	-0.711508	-1.10586	-0.978312	NC	-1.55818	-1.96514	-1.82499	-2.23195	D	-1.10982	-1.00218	-0.702858	-0.59522	NC	-1.82894	-1.72131	-1.95649	-1.84885	D
5274	SERPINI1	0.76651	0.776225	0.441269	0.450984	NC	4.45036	4.74131	4.12512	4.41607	U	-0.487097	-0.422643	-0.77805	-0.713597	NC	3.19675	3.26121	3.18704	3.25149	U
5295	PIK3R1	0.731218	0.664383	0.169968	0.103134	NC	-1.8912	-2.93002	-2.45245	-3.49127	D	0.037802	-0.0899919	1.07662	0.948827	NC	-2.58462	-2.71241	-2.51778	-2.64558	D
5307	PITX1	-0.574368	-0.678769	-0.291393	-0.395795	NC	-2.2851	-2.60745	-2.00212	-2.32448	D	-0.549712	-0.804808	-0.227359	-0.482455	NC	-2.26044	-2.51554	-2.15604	-2.41114	D
5334	PLCL1	-1	-1	NA	NA	NC	4.35755	3.90689	5.35755	4.90689	U	-1.18763	-1.35755	-0.736966	-0.906891	NC	4.16993	4	4.16993	4	U
53344	CHIC1	-0.60812	-0.461731	-0.671051	-0.524662	NC	-1.48727	-2.38773	-1.5502	-2.45066	D	-1.05247	-0.347923	-0.152003	0.552541	NC	-1.93161	-1.22707	-2.078	-1.37346	D
5339	PLEC	0.0202451	-0.316926	-0.0770266	-0.414198	NC	-1.55264	-1.94808	-1.64991	-2.04535	D	0.0294991	0.0403829	0.424937	0.435821	NC	-1.54338	-1.5325	-1.20621	-1.19533	D
5371	PML	0.703607	0.43535	0.606658	0.338401	NC	-1.16057	-1.92859	-1.25752	-2.02554	D	0.185579	0.31614	0.953592	1.08415	NC	-1.6786	-1.54804	-1.41034	-1.27978	D
5373	PMM2	-0.320859	-0.347415	-0.195059	-0.221614	NC	-1.80653	-1.62908	-1.68073	-1.50328	D	0.210666	0.0740582	0.0332131	-0.103395	NC	-1.27501	-1.41162	-1.24845	-1.38506	D
5376	PMP22	-0.0705615	0.675056	-0.0215332	0.724084	NC	-1.80392	-2.31849	-1.75489	-2.26946	D	0.678072	-1.20645	1.19265	-0.691878	NC	-1.05528	-2.93981	-1.8009	-3.68542	D
5378	PMS1	0.388326	0.465239	0.199378	0.276292	NC	-1.44656	-1.08101	-1.63551	-1.26996	D	-0.472068	0.251807	-0.837618	-0.113742	NC	-2.30696	-1.58308	-2.38387	-1.66	D
53838	C11orf24	0.196067	0.317727	0.195787	0.317448	NC	-1.97532	-2.09686	-1.9756	-2.09714	D	0.484012	0.192233	0.60555	0.31377	NC	-1.68738	-1.97916	-1.80904	-2.10082	D
53947	A4GALT	0.543631	0.275567	0.800295	0.532231	NC	-2.27445	-3.06123	-2.01778	-2.80457	D	-0.586847	-0.134117	0.199938	0.652667	NC	-3.40492	-2.95219	-3.13686	-2.68413	D
54058	C21orf58	1.31647	1.07943	0.722466	0.485427	NC	2.28331	2.21459	1.6893	1.62059	U	0.95744	0.31969	1.02615	0.388402	NC	1.92427	1.28652	2.16131	1.52356	U
5429	POLH	0.157113	-0.112894	0.18215	-0.0878575	NC	1.41852	1.94948	1.44356	1.97452	U	0.263421	0.0546627	-0.26754	-0.476298	NC	1.52483	1.31607	1.79484	1.58608	U
[truncated: 1,621 more rows]
