# Supplementary material for: Disruption of TFIIH activities generates a stress gene expression response and reveals possible new targets against cancer
Source: Open Biol. 2020 Jun 17;10(6):200050. doi: 10.1098/rsob.200050 (PMC7333893; doi:10.1098/rsob.200050)
Supplement: Table S2 [file rsob200050supp3.xlsx]

## Sheet: ChIP_NTF_UP
chr	Start	End	PeakID	Treatment Tags	Control Tags	Fold DOWN	Fold UP	p-value	Status	Annotation	Nearest PromoterID	Distance to TSS	Entrez ID	Nearest Refseq	Gene name	Log2FC
chr1	156391445	156391710	3_NTT1_cutoff_0.02_peak_1662	110.5	5	3.42e-104	22.1	0.0452489	UP	promoter-TSS (NR_135266)	NR_135267	-14	10485	NM_006365	C1orf61	4.46597
chr2	160654202	160654438	3_NTT1_cutoff_0.02_peak_11754	20.7	1	1.59e-19	20.71	0.0482859	UP	intron (NM_001198760, intron 33 of 37)	NM_014880	446	9936	NM_014880	CD302	4.37226
chr6	43612273	43612442	3_NTT1_cutoff_0.02_peak_16541	20.7	1	1.59e-19	20.71	0.0482859	UP	promoter-TSS (NM_152732)	NM_152732	-409	221421	NM_152732	RSPH9	4.37226
chr6	36587402	36589581	3_NTT1_cutoff_0.02_peak_16421	277.1	15	2.51e-239	18.47	0.0541419	UP	Intergenic	NR_037491	1797	100500885	NR_037491	MIR3925	4.20711
chr8	101661821	101662120	3_NTT1_cutoff_0.02_peak_18314	54.4	3	1.33e-47	18.12	0.0551876	UP	promoter-TSS (NM_152628)	NM_152628	-78	169166	NM_152628	SNX31	4.17951
chr5	140090234	140091066	3_NTT1_cutoff_0.02_peak_15756	304.7	18	2.53e-251	16.93	0.0590667	UP	promoter-TSS (NR_026703)	NR_026703	-211	56664	NR_026703	VTRNA1-1	4.08151
chr6	24646263	24646760	3_NTT1_cutoff_0.02_peak_16184	85.4	6	1.31e-65	14.24	0.0702247	UP	promoter-TSS (NM_001168374)	NM_001350403	-129	9856	NM_014809	KIAA0319	3.83188
chr1	204329363	204329577	3_NTT1_cutoff_0.02_peak_2032	39.7	3	1.07e-29	13.23	0.0755858	UP	promoter-TSS (NM_014935)	NM_014935	-413	22874	NM_014935	PLEKHA6	3.72574
chr16	31214089	31214725	3_NTT1_cutoff_0.02_peak_7557	123.4	12	3.07e-78	10.29	0.0971817	UP	promoter-TSS (NM_013258)	NM_145182	-310	29108	NM_013258	PYCARD	3.36317
chr6	16129205	16129501	1_NT1_cutoff_0.02_peak_21688	365.1	42	7.92e-205	8.69	0.115075	UP	promoter-TSS (NM_013262)	NM_013262	36	29116	NM_013262	MYLIP	3.11936
chr19	36266304	36266552	3_NTT1_cutoff_0.02_peak_10365	43.2	5	1.43e-25	8.63	0.115875	UP	promoter-TSS (NM_001172630)	NM_052948	11	115703	NM_052948	ARHGAP33	3.10936
chr10	45474178	45474409	3_NTT1_cutoff_0.02_peak_2681	73.4	9	1.44e-40	8.15	0.122699	UP	promoter-TSS (NM_007021)	NM_007021	36	11067	NM_007021	DEPP1	3.0268
chr11	831266	832548	3_NTT1_cutoff_0.02_peak_3217	250.3	32	8.7e-131	7.82	0.127877	UP	TTS (NM_173584)	NM_001039490	-1045	977	NM_004357	CD151	2.96717
chr10	73571774	73571976	3_NTT1_cutoff_0.02_peak_2804	53.5	7	1.51e-28	7.64	0.13089	UP	5' UTR (NM_001171935, exon 1 of 5)	NM_001171935	235	64072	NM_022124	CDH23	2.93357
chr1	212781992	212782288	1_NT1_cutoff_0.02_peak_2651	611.1	82	1.21e-305	7.45	0.134228	UP	5' UTR (NM_001206488, exon 1 of 4)	NM_001040619	170	467	NM_001674	ATF3	2.89724
chr9	92219789	92220097	3_NTT1_cutoff_0.02_peak_18938	57.8	8	2.87e-29	7.23	0.138313	UP	promoter-TSS (NM_006705)	NM_006705	16	10912	NM_006705	GADD45G	2.854
chr2	27273493	27273676	1_NT1_cutoff_0.02_peak_14761	340.9	48	1.36e-164	7.1	0.140845	UP	promoter-TSS (NR_046730)	NR_046730	-453	100874031	NR_046730	AGBL5-AS1	2.82782
chr1	229570709	229570885	3_NTT1_cutoff_0.02_peak_2336	35.4	5	2.2e-18	7.08	0.141243	UP	promoter-TSS (NM_001100)	NM_001100	-954	58	NM_001100	ACTA1	2.82375
chr11	828642	829899	3_NTT1_cutoff_0.02_peak_3215	130.3	19	1.75e-62	6.86	0.145773	UP	intron (NM_001286606, intron 2 of 8)	NM_001286606	1011	283229	NM_173584	CRACR2B	2.77821
chr9	78505411	78505763	3_NTT1_cutoff_0.02_peak_18882	80.3	12	2.18e-38	6.69	0.149477	UP	promoter-TSS (NM_001190482)	NM_006200	27	5125	NM_006200	PCSK5	2.74201
chr9	101984467	101984736	1_NT1_cutoff_0.02_peak_25843	192.5	29	5.08e-89	6.64	0.150602	UP	promoter-TSS (NM_033087)	NM_006808	32	10952	NM_006808	SEC61B	2.73118
chr10	51575856	51576113	3_NTT1_cutoff_0.02_peak_2697	12.9	2	1.36e-06	6.47	0.15456	UP	promoter-TSS (NM_001145262)	NM_001145262	-300	8031	NM_005437	NCOA4	2.69377
chr14	68086420	68086989	3_NTT1_cutoff_0.02_peak_6031	155.4	24	7.98e-71	6.47	0.15456	UP	exon (NM_001172, exon 1 of 8)	NM_001172	126	384	NM_001172	ARG2	2.69377
chr5	139725932	139726307	1_NT1_cutoff_0.02_peak_21046	649	102	1.83e-286	6.36	0.157233	UP	promoter-TSS (NM_001945)	NM_001945	68	1839	NM_001945	HBEGF	2.66903
chr11	826861	827808	3_NTT1_cutoff_0.02_peak_3212	163.1	26	1.32e-72	6.27	0.15949	UP	promoter-TSS (NM_173584)	NM_173584	-925	283229	NM_173584	CRACR2B	2.64847
chr8	94766948	94767306	3_NTT1_cutoff_0.02_peak_18263	81.1	13	7.86e-37	6.24	0.160256	UP	promoter-TSS (NM_001142301)	NM_001142301	55	91147	NM_153704	TMEM67	2.64155
chr8	27472073	27472346	1_NT1_cutoff_0.02_peak_24440	203.7	33	1.55e-88	6.17	0.162075	UP	5' UTR (NM_001831, exon 1 of 9)	NM_001831	118	1191	NM_001831	CLU	2.62527
chr4	74088464	74088976	3_NTT1_cutoff_0.02_peak_14810	79.4	13	3.03e-35	6.11	0.163666	UP	exon (NM_001286771, exon 1 of 34)	NM_001286771	111	26057	NM_015574	ANKRD17	2.61117
chr17	17399553	17399975	3_NTT1_cutoff_0.02_peak_8226	177.8	30	9.06e-75	5.93	0.168634	UP	promoter-TSS (NM_016084)	NM_001199989	-55	51655	NM_016084	RASD1	2.56803
chr2	230784993	230785242	3_NTT1_cutoff_0.02_peak_12140	35.4	6	4.94e-16	5.9	0.169492	UP	intron (NM_001348325, intron 1 of 42)	NM_001348326	986	9320	NM_004238	TRIP12	2.56071
chr8	144512760	144513033	3_NTT1_cutoff_0.02_peak_18530	111.3	19	3.34e-47	5.86	0.170648	UP	promoter-TSS (NM_201589)	NM_201589	-295	389692	NM_201589	MAFA	2.5509
chr12	6559867	6560043	3_NTT1_cutoff_0.02_peak_4237	40.6	7	8.57e-18	5.8	0.172414	UP	promoter-TSS (NR_147126)	NR_015382	728	678655	NR_015382	CD27-AS1	2.53605
chr8	143695673	143695998	3_NTT1_cutoff_0.02_peak_18522	86.3	15	2.12e-36	5.75	0.173913	UP	promoter-TSS (NM_015193)	NM_015193	-3	23237	NM_015193	ARC	2.52356
chr2	201936184	201936457	1_NT1_cutoff_0.02_peak_15875	176.1	31	6.36e-72	5.68	0.176056	UP	promoter-TSS (NM_001321628)	NM_001321626	30	285172	NM_173822	FAM126B	2.50589
chr1	151345056	151345246	3_NTT1_cutoff_0.02_peak_1445	76.8	14	6.87e-31	5.49	0.182149	UP	promoter-TSS (NM_001258289)	NM_003944	59	8991	NM_003944	SELENBP1	2.45681
chr1	32859907	32860119	1_NT1_cutoff_0.02_peak_662	65.6	12	1.28e-26	5.47	0.182815	UP	promoter-TSS (NR_125352)	NM_018045	49	55108	NM_018045	BSDC1	2.45154
chrX	62780871	62781070	3_NTT1_cutoff_0.02_peak_19603	32.8	6	9.15e-14	5.47	0.182815	UP	promoter-TSS (NR_015353)	NR_152613	4	92249	NR_015353	LINC01278	2.45154
chr16	71842537	71843028	1_NT1_cutoff_0.02_peak_10190	288.3	53	6.38e-112	5.44	0.183824	UP	5' UTR (NM_001128, exon 1 of 23)	NM_001128	193	164	NM_001128	AP1G1	2.44361
chr9	96215667	96216104	1_NT1_cutoff_0.02_peak_25744	135.5	25	3.33e-53	5.42	0.184502	UP	promoter-TSS (NR_136230)	NR_136231	-3	158293	NM_198841	FAM120AOS	2.43829
chr16	31213318	31213496	1_NT1_cutoff_0.02_peak_9886	107	20	3.34e-42	5.35	0.186916	UP	intron (NR_102400, intron 1 of 1)	NR_102400	201	100652740	NR_102400	PYCARD-AS1	2.41954
chr19	58090152	58090343	3_NTT1_cutoff_0.02_peak_10913	77.7	15	9.44e-30	5.18	0.19305	UP	promoter-TSS (NM_017879)	NM_017879	47	55659	NM_017879	ZNF416	2.37295
chr19	7694290	7694486	1_NT1_cutoff_0.02_peak_13108	190.7	37	9.93e-71	5.16	0.193798	UP	promoter-TSS (NM_020196)	NM_020196	51	56949	NM_020196	XAB2	2.36737
chr5	180649309	180649762	3_NTT1_cutoff_0.02_peak_16092	189	37	5.11e-70	5.11	0.195695	UP	promoter-TSS (NM_033549)	NR_039781	97	100616342	NR_039781	MIR4638	2.35332
chr1	150523924	150527413	3_NTT1_cutoff_0.02_peak_1384	1227.3	242	0	5.07	0.197239	UP	exon (NM_019032, exon 5 of 19)	NR_036211	1264	100422997	NR_036211	MIR4257	2.34199
chr16	75600187	75600526	3_NTT1_cutoff_0.02_peak_7789	110.5	22	1.02e-40	5.02	0.199203	UP	5' UTR (NM_007285, exon 1 of 4)	NM_007285	108	11345	NM_007285	GABARAPL2	2.32769
chr14	82000029	82000258	1_NT1_cutoff_0.02_peak_8242	114.8	23	8.7e-42	4.99	0.200401	UP	promoter-TSS (NM_005065)	NM_001244984	61	6400	NM_005065	SEL1L	2.31904
chr1	41950257	41950458	3_NTT1_cutoff_0.02_peak_656	39.7	8	3.41e-15	4.96	0.201613	UP	promoter-TSS (NR_126098)	NM_001302269	-4	1907	NM_001956	EDN2	2.31034
chr5	16441065	16441315	3_NTT1_cutoff_0.02_peak_15184	19.9	4	5.16e-08	4.96	0.201613	UP	promoter-TSS (NR_104625)	NR_104625	21	101929505	NR_104625	LINC02150	2.31034
chr15	64443888	64444263	3_NTT1_cutoff_0.02_peak_6624	29.3	6	1.29e-11	4.89	0.204499	UP	intron (NM_024798, intron 1 of 6)	NR_073534	160	79856	NM_024798	SNX22	2.28983
chr16	15149911	15150389	3_NTT1_cutoff_0.02_peak_7351	96.7	20	2.07e-34	4.83	0.207039	UP	promoter-TSS (NM_001270766)	NM_173474	-214	123803	NM_173474	NTAN1	2.27202
chr9	102583987	102584286	3_NTT1_cutoff_0.02_peak_19012	48.3	10	4.59e-18	4.83	0.207039	UP	promoter-TSS (NM_006981)	NM_006981	0	8013	NM_006981	NR4A3	2.27202
chr19	16435348	16435772	3_NTT1_cutoff_0.02_peak_10147	139.8	29	6.26e-49	4.82	0.207469	UP	promoter-TSS (NM_016270)	NM_016270	-77	10365	NM_016270	KLF2	2.26903
chr12	6579625	6580006	1_NT1_cutoff_0.02_peak_5651	511.8	108	2.8e-172	4.74	0.21097	UP	non-coding (NR_123717, exon 1 of 4)	NR_123717	249	6843	NM_014231	VAMP1	2.24489
chr6	110501504	110501843	3_NTT1_cutoff_0.02_peak_16734	84.6	18	1.62e-29	4.7	0.212766	UP	promoter-TSS (NM_003931)	NM_015891	50	51362	NM_015891	CDC40	2.23266
chr6	31633739	31634024	3_NTT1_cutoff_0.02_peak_16348	23.3	5	3.91e-09	4.66	0.214592	UP	promoter-TSS (NM_033177)	NM_001199237	178	7918	NM_033177	GPANK1	2.22033
chr16	1663994	1664257	3_NTT1_cutoff_0.02_peak_7098	60.4	13	2.37e-21	4.65	0.215054	UP	promoter-TSS (NM_020825)	NM_020825	-515	57585	NM_020825	CRAMP1	2.21723
chr1	151253583	151253881	3_NTT1_cutoff_0.02_peak_1434	96.7	21	8.36e-33	4.6	0.217391	UP	promoter-TSS (NM_001304764)	NM_001304764	-299	57592	NM_020832	ZNF687	2.20163
chr12	6562090	6562840	3_NTT1_cutoff_0.02_peak_4239	87.2	19	6.05e-30	4.59	0.217865	UP	intron (NR_147126, intron 2 of 7)	NM_001351355	1288	55080	NM_018009	TAPBPL	2.19849
chr9	34989496	34990251	3_NTT1_cutoff_0.02_peak_18774	105.3	23	1.16e-35	4.58	0.218341	UP	promoter-TSS (NM_001135005)	NM_001349725	236	25822	NM_012266	DNAJB5	2.19535
chr1	17380359	17380641	1_NT1_cutoff_0.02_peak_354	159.7	35	8.79e-53	4.56	0.219298	UP	exon (NM_003000, exon 1 of 8)	NM_003000	165	6390	NM_003000	SDHB	2.18903
chr16	89557285	89557528	1_NT1_cutoff_0.02_peak_10355	100.1	22	6.67e-34	4.55	0.21978	UP	promoter-TSS (NM_001256182)	NM_001256182	-438	29123	NM_013275	ANKRD11	2.18587
chr7	33080321	33080782	3_NTT1_cutoff_0.02_peak_17232	68.2	15	1.48e-23	4.55	0.21978	UP	5' UTR (NM_016489, exon 1 of 10)	NM_001356996	225	51251	NM_016489	NT5C3A	2.18587
chr10	102045762	102046644	1_NT1_cutoff_0.02_peak_3790	359	80	3.4e-115	4.49	0.222717	UP	promoter-TSS (NM_001282438)	NM_001282438	-68	282991	NM_173809	BLOC1S2	2.16672
chr19	44669100	44669412	1_NT1_cutoff_0.02_peak_14012	210.6	47	6.51e-68	4.48	0.223214	UP	promoter-TSS (NM_016444)	NM_001032374	7	7769	NM_015919	ZNF226	2.1635
chr5	89825161	89825488	1_NT1_cutoff_0.02_peak_20722	111.3	25	1.5e-36	4.45	0.224719	UP	promoter-TSS (NM_001286812)	NM_198273	76	116068	NM_198273	LYSMD3	2.15381
chr6_mcf_hap5	167618	167786	3_NTT1_cutoff_0.02_peak_17001	31.1	7	2.23e-11	4.44	0.225225	UP	promoter-TSS (NR_104117).4	NR_104117	-169	414760	NR_104117	HCG14	2.15056
chr12	49259534	49259730	1_NT1_cutoff_0.02_peak_5988	132.9	30	1.03e-42	4.43	0.225734	UP	promoter-TSS (NM_014470)	NM_014470	21	27289	NM_014470	RND1	2.14731
chr15	40885836	40886131	3_NTT1_cutoff_0.02_peak_6423	35.4	8	1.69e-12	4.42	0.226244	UP	promoter-TSS (NM_144508)	NM_144508	-463	57082	NM_144508	KNL1	2.14405
chr2	8822061	8822390	1_NT1_cutoff_0.02_peak_14601	414.3	94	6.53e-130	4.41	0.226757	UP	promoter-TSS (NR_110154)	NM_002166	113	3398	NM_002166	ID2	2.14078
chr1	40626769	40627220	1_NT1_cutoff_0.02_peak_869	310.7	71	6.79e-97	4.38	0.228311	UP	promoter-TSS (NM_012421)	NM_012421	-46	6018	NM_012421	RLF	2.13093
chr12	57905966	57906903	3_NTT1_cutoff_0.02_peak_4666	139.8	32	2.8e-44	4.37	0.228833	UP	promoter-TSS (NR_106816)	NR_106816	-36	102465454	NR_106816	MIR6758	2.12763
chr1	118148630	118148833	1_NT1_cutoff_0.02_peak_1553	126	29	2.54e-40	4.35	0.229885	UP	promoter-TSS (NR_121626)	NM_017709	128	54855	NM_017709	TENT5C	2.12102
chr19	57874812	57875051	1_NT1_cutoff_0.02_peak_14502	163.1	38	6.51e-51	4.29	0.2331	UP	5' UTR (NM_173631, exon 1 of 4)	NM_001355204	129	10597	NM_001355204	TRAPPC2B	2.10098
chr2	37311333	37312002	3_NTT1_cutoff_0.02_peak_11161	127.7	30	1.59e-39	4.26	0.234742	UP	promoter-TSS (NM_001278505)	NM_174931	74	253635	NM_174931	GPATCH11	2.09085
chr12	112600644	112601093	3_NTT1_cutoff_0.02_peak_4955	33.7	8	3.19e-11	4.21	0.23753	UP	TTS (NR_106921)	NR_106921	256	102465519	NR_106921	MIR6861	2.07382
chr2	222436873	222437115	3_NTT1_cutoff_0.02_peak_12126	67.3	16	1.91e-21	4.21	0.23753	UP	promoter-TSS (NM_004438)	NM_001304537	84	2043	NM_004438	EPHA4	2.07382
chr11	76156602	76156993	1_NT1_cutoff_0.02_peak_5194	113.1	27	6.12e-35	4.19	0.238663	UP	intron (NM_001300942, intron 1 of 21)	NM_001300943	729	56946	NM_020193	EMSY	2.06695
chr7	23529955	23530363	3_NTT1_cutoff_0.02_peak_17170	29.3	7	4.32e-10	4.19	0.238663	UP	non-coding (NR_026676, exon 1 of 1)	NR_026676	152	256355	NR_026676	RPS2P32	2.06695
chr15	80364814	80365036	3_NTT1_cutoff_0.02_peak_6818	25	6	5.89e-09	4.17	0.239808	UP	promoter-TSS (NM_001242916)	NM_001242915	22	54469	NM_019006	ZFAND6	2.06005
chr6	43592072	43594148	3_NTT1_cutoff_0.02_peak_16534	275.3	66	6.69e-82	4.17	0.239808	UP	exon (NM_019096, exon 5 of 12)	NM_001286216	1980	54676	NM_019096	GTPBP2	2.06005
chr3	15468801	15469351	1_NT1_cutoff_0.02_peak_18188	309.9	76	2.77e-89	4.08	0.245098	UP	promoter-TSS (NM_001330662)	NM_033083	12	85403	NM_033083	EAF1	2.02857
chr8	107072610	107072817	3_NTT1_cutoff_0.02_peak_18407	28.5	7	1.81e-09	4.07	0.2457	UP	promoter-TSS (NR_125796)	NR_125797	17	102723356	NR_125796	ZFPM2-AS1	2.02503
chr1	32860231	32860399	3_NTT1_cutoff_0.02_peak_499	52.6	13	3.12e-16	4.05	0.246914	UP	promoter-TSS (NR_125352)	NM_001143890	-253	55108	NM_018045	BSDC1	2.01792
chr7	75623711	75624111	3_NTT1_cutoff_0.02_peak_17470	105.3	26	2.34e-31	4.05	0.246914	UP	promoter-TSS (NM_001317803)	NM_031925	81	83862	NM_031925	TMEM120A	2.01792
chr13	22245079	22245343	3_NTT1_cutoff_0.02_peak_5238	24.2	6	2.48e-08	4.03	0.248139	UP	promoter-TSS (NM_002010)	NM_002010	-4	2254	NM_002010	FGF9	2.01078
chr14	76452069	76452295	1_NT1_cutoff_0.02_peak_8205	96.7	24	1.6e-28	4.03	0.248139	UP	promoter-TSS (NM_001102564)	NM_001255995	86	112752	NM_052873	IFT43	2.01078
chr14	102771510	102771738	3_NTT1_cutoff_0.02_peak_6285	48.3	12	4.13e-15	4.03	0.248139	UP	promoter-TSS (NM_001353830)	NM_001353829	-87	5891	NM_014226	MOK	2.01078
chr10	7829790	7830592	1_NT1_cutoff_0.02_peak_3099	406.5	101	3.74e-115	4.02	0.248756	UP	promoter-TSS (NR_045609)	NM_005174	124	509	NM_005174	ATP5F1C	2.0072
chr12	56583852	56584226	3_NTT1_cutoff_0.02_peak_4614	151.9	38	1.71e-43	4	0.25	UP	promoter-TSS (NM_001130420)	NM_001130420	-681	6601	NM_003075	SMARCC2	2
chr21	37528427	37528737	3_NTT1_cutoff_0.02_peak_12903	76	19	2.42e-22	4	0.25	UP	promoter-TSS (NM_001320714)	NR_038892	24	100506428	NR_038892	CBR3-AS1	2
chr2	97405652	97405889	1_NT1_cutoff_0.02_peak_15296	103.6	26	3.8e-30	3.98	0.251256	UP	promoter-TSS (NM_001322350)	NM_030805	42	81562	NM_030805	LMAN2L	1.99277
chr2	47381542	47381744	3_NTT1_cutoff_0.02_peak_11239	19.9	5	1.4e-06	3.97	0.251889	UP	intron (NM_001163561, intron 1 of 6)	NM_173649	874	285051	NM_173649	STPG4	1.98914
chr19	3506186	3506532	1_NT1_cutoff_0.02_peak_12956	229.6	58	1.71e-64	3.96	0.252525	UP	promoter-TSS (NM_016263)	NM_016263	64	51343	NM_016263	FZR1	1.9855
chr4	128553998	128554309	3_NTT1_cutoff_0.02_peak_14989	55.2	14	9.49e-17	3.95	0.253165	UP	promoter-TSS (NM_015693)	NM_015693	67	27152	NM_015693	INTU	1.98185
chr1	156164191	156164386	3_NTT1_cutoff_0.02_peak_1633	35.4	9	3.97e-11	3.93	0.254453	UP	intron (NR_104412, intron 1 of 1)	NM_001286184	566	9673	NM_014655	SLC25A44	1.97453
chr17	30770663	30770925	3_NTT1_cutoff_0.02_peak_8461	35.4	9	3.97e-11	3.93	0.254453	UP	promoter-TSS (NM_001270482)	NM_002815	-687	5717	NM_002815	PSMD11	1.97453
chr12	122986041	122986337	3_NTT1_cutoff_0.02_peak_5077	43.2	11	2.22e-13	3.92	0.255102	UP	promoter-TSS (NM_001350937)	NM_001350935	-569	55596	NM_017612	ZCCHC8	1.97085
chr9	131037761	131038325	1_NT1_cutoff_0.02_peak_26048	151.9	39	3.2e-42	3.89	0.257069	UP	promoter-TSS (NM_001318089)	NM_004486	225	2801	NM_004486	GOLGA2	1.95977
chr11	85338959	85339127	3_NTT1_cutoff_0.02_peak_3988	23.3	6	1.01e-07	3.88	0.257732	UP	promoter-TSS (NM_001350393)	NM_001351274	338	1740	NM_001364	DLG2	1.95606
chr8	20054746	20055064	1_NT1_cutoff_0.02_peak_24371	189.9	49	3.88e-52	3.88	0.257732	UP	5' UTR (NM_001693, exon 1 of 14)	NM_001693	201	526	NM_001693	ATP6V1B2	1.95606
chr11	46722479	46722710	1_NT1_cutoff_0.02_peak_4563	158.8	41	7.5e-44	3.87	0.258398	UP	promoter-TSS (NM_004308)	NM_001184751	-49	79797	NM_024741	ZNF408	1.95233
chr19	50528421	50528717	1_NT1_cutoff_0.02_peak_14333	166.6	43	4.53e-46	3.87	0.258398	UP	promoter-TSS (NM_015428)	NM_001308420	74	51231	NM_016440	VRK3	1.95233
chr13	111367228	111367994	1_NT1_cutoff_0.02_peak_7551	725	188	1.33e-193	3.86	0.259067	UP	promoter-TSS (NM_001267728)	NM_001267728	-173	3621	NM_005537	ING1	1.9486
chr14	92505565	92505846	3_NTT1_cutoff_0.02_peak_6212	65.6	17	6.43e-19	3.86	0.259067	UP	intron (NM_004239, intron 1 of 20)	NM_001321851	697	9321	NM_004239	TRIP11	1.9486
chr6	131949055	131949444	1_NT1_cutoff_0.02_peak_22475	162.3	42	5.83e-45	3.86	0.259067	UP	5' UTR (NM_001270522, exon 1 of 30)	NM_015979	129	9439	NM_004830	MED23	1.9486
chr12	120883383	120883551	3_NTT1_cutoff_0.02_peak_5016	34.5	9	1.56e-10	3.84	0.260417	UP	promoter-TSS (NM_176818)	NM_016399	748	51499	NM_016399	TRIAP1	1.94111
chr2	65356972	65357369	1_NT1_cutoff_0.02_peak_15083	211.5	55	1.29e-57	3.84	0.260417	UP	5' UTR (NM_015543, exon 1 of 4)	NM_004161	264	5861	NM_004161	RAB1A	1.94111
chr9	132815963	132816333	1_NT1_cutoff_0.02_peak_26149	256.3	67	3.76e-69	3.83	0.261097	UP	5' UTR (NM_001136557, exon 1 of 20)	NM_001136557	163	57720	NM_020960	GPR107	1.93734
chr12	62860377	62860797	1_NT1_cutoff_0.02_peak_6414	198.5	52	1.05e-53	3.82	0.26178	UP	promoter-TSS (NM_001278471)	NM_015026	-10	23041	NM_015026	MON2	1.93357
chr17	27573821	27574363	3_NTT1_cutoff_0.02_peak_8330	53.5	14	1.46e-15	3.82	0.26178	UP	intron (NM_005208, intron 1 of 5)	NM_005208	217	1411	NM_005208	CRYBA1	1.93357
chrX	149106543	149106691	1_NT1_cutoff_0.02_peak_26882	72.5	19	1.45e-20	3.82	0.26178	UP	promoter-TSS (NR_027456)	NM_001013845	99	541578	NM_001013845	CXorf40B	1.93357
chr14	58765290	58765439	1_NT1_cutoff_0.02_peak_8015	83.7	22	2.52e-23	3.81	0.262467	UP	promoter-TSS (NR_029434)	NM_023001	143	5926	NM_002892	ARID4A	1.92979
chr11	62560541	62564125	3_NTT1_cutoff_0.02_peak_3592	481.6	127	8.92e-127	3.79	0.263852	UP	intron (NM_001081491, intron 17 of 19)	NR_106769	-2090	102465257	NR_106769	MIR6514	1.9222
chr17	6554699	6555073	1_NT1_cutoff_0.02_peak_10598	147.6	39	6.98e-40	3.78	0.26455	UP	promoter-TSS (NM_016060)	NM_016060	68	51003	NM_016060	MED31	1.91839
chr5	142149831	142150091	3_NTT1_cutoff_0.02_peak_15775	79.4	21	3.27e-22	3.78	0.26455	UP	promoter-TSS (NR_146198)	NM_015071	12	23092	NM_015071	ARHGAP26	1.91839
chr14	73603010	73603677	1_NT1_cutoff_0.02_peak_8140	245.1	65	3.39e-65	3.77	0.265252	UP	intron (NM_000021, intron 1 of 11)	NM_007318	201	5663	NM_000021	PSEN1	1.91456
chr4	3076353	3076570	1_NT1_cutoff_0.02_peak_19581	101.8	27	1e-27	3.77	0.265252	UP	promoter-TSS (NM_002111)	NM_002111	54	3064	NM_002111	HTT	1.91456
chr5	171433367	171433735	1_NT1_cutoff_0.02_peak_21316	210.6	56	8.09e-56	3.76	0.265957	UP	5' UTR (NM_033645, exon 1 of 12)	NM_033644	326	23291	NM_012300	FBXW11	1.91073
chr7	129710316	129710619	1_NT1_cutoff_0.02_peak_24023	105.3	28	7.76e-29	3.76	0.265957	UP	5' UTR (NM_014997, exon 1 of 10)	NM_014997	119	23008	NM_014997	KLHDC10	1.91073
chr9	110251876	110252177	1_NT1_cutoff_0.02_peak_25872	180.4	48	4.05e-48	3.76	0.265957	UP	promoter-TSS (NM_001314052)	NM_004235	-26	9314	NM_004235	KLF4	1.91073
chr6	144329190	144329526	3_NTT1_cutoff_0.02_peak_16826	176.1	47	5.18e-47	3.75	0.266667	UP	non-coding (NR_002768, exon 1 of 1)	NM_001080954	195	5325	NM_002656	PLAGL1	1.90689
chr1	46597674	46597894	3_NTT1_cutoff_0.02_peak_796	22.4	6	3.91e-07	3.74	0.26738	UP	promoter-TSS (NM_001328650)	NM_001328650	-341	8503	NM_003629	PIK3R3	1.90304
chr19	821393	822073	3_NTT1_cutoff_0.02_peak_9609	78.5	21	1.24e-21	3.74	0.26738	UP	intron (NM_024888, intron 1 of 6)	NM_001270366	219	79948	NM_024888	PLPPR3	1.90304
chrX	20135481	20135649	3_NTT1_cutoff_0.02_peak_19463	11.2	3	0.000292	3.74	0.26738	UP	promoter-TSS (NM_001168466)	NM_152780	-451	256714	NM_152780	MAP7D2	1.90304
chr20	55043552	55043745	1_NT1_cutoff_0.02_peak_16886	119.1	32	4.01e-32	3.72	0.268817	UP	promoter-TSS (NM_001283037)	NM_001283037	8	51507	NM_016407	RTF2	1.8953
chr3	49057356	49057699	3_NTT1_cutoff_0.02_peak_13729	59.6	16	1.22e-16	3.72	0.268817	UP	promoter-TSS (NM_199074)	NR_029948	139	494337	NR_029948	MIR425	1.8953
chr2	153031867	153032394	1_NT1_cutoff_0.02_peak_15561	174.3	47	7.26e-46	3.71	0.269542	UP	exon (NM_005843, exon 1 of 14)	NM_005843	375	10254	NM_005843	STAM2	1.89142
chr1	150521358	150522093	1_NT1_cutoff_0.02_peak_1688	658.5	178	1.49e-167	3.7	0.27027	UP	promoter-TSS (NM_019032)	NM_019032	-119	54507	NM_019032	ADAMTSL4	1.88753
chr11	114271620	114271778	1_NT1_cutoff_0.02_peak_5363	51.8	14	2.07e-14	3.7	0.27027	UP	promoter-TSS (NM_019021)	NM_001271562	-427	54494	NM_019021	C11orf71	1.88753
chr11	34379361	34379670	1_NT1_cutoff_0.02_peak_4515	158.8	43	1.91e-41	3.69	0.271003	UP	promoter-TSS (NM_145804)	NM_145804	39	25841	NM_145804	ABTB2	1.88362
chr22	21921902	21922301	1_NT1_cutoff_0.02_peak_17437	251.2	68	4.52e-65	3.69	0.271003	UP	promoter-TSS (NR_046082)	NR_046082	83	7332	NM_003347	UBE2L3	1.88362
chr5	172484296	172484484	3_NTT1_cutoff_0.02_peak_15966	66.5	18	2.69e-18	3.69	0.271003	UP	intron (NM_001168393, intron 1 of 3)	NM_001168394	1035	153222	NM_153607	CREBRF	1.88362
chr8	73921011	73921277	1_NT1_cutoff_0.02_peak_24648	92.4	25	6.22e-25	3.69	0.271003	UP	promoter-TSS (NM_003218)	NM_003218	47	7013	NM_003218	TERF1	1.88362
chr2	225449920	225450233	1_NT1_cutoff_0.02_peak_16075	151	41	8.41e-40	3.68	0.271739	UP	promoter-TSS (NM_003590)	NM_003590	37	8452	NM_003590	CUL3	1.87971
chr11	57529159	57529580	1_NT1_cutoff_0.02_peak_4648	132.1	36	7.68e-35	3.67	0.27248	UP	5' UTR (NM_001206891, exon 1 of 19)	NM_001085460	136	1500	NM_001331	CTNND1	1.87578
chr15	89438630	89438798	3_NTT1_cutoff_0.02_peak_6856	14.7	4	7.63e-05	3.67	0.27248	UP	5' UTR (NM_001307952, exon 1 of 6)	NM_178232	143	145864	NM_178232	HAPLN3	1.87578
chr2	219135086	219135454	3_NTT1_cutoff_0.02_peak_12092	73.4	20	5.96e-20	3.67	0.27248	UP	promoter-TSS (NM_001087)	NM_015488	155	25953	NM_015488	PNKD	1.87578
chr2	148778523	148778811	1_NT1_cutoff_0.02_peak_15531	124.3	34	1.25e-32	3.66	0.273224	UP	promoter-TSS (NM_001190881)	NM_018328	87	55777	NM_018328	MBD5	1.87184
chr1	155826800	155827133	1_NT1_cutoff_0.02_peak_1962	189.9	52	1.49e-48	3.65	0.273973	UP	5' UTR (NM_001282858, exon 1 of 32)	NM_001282858	119	54856	NM_032292	GON4L	1.8679
chr21	34100139	34100564	1_NT1_cutoff_0.02_peak_17112	145.9	40	1.44e-37	3.65	0.273973	UP	promoter-TSS (NM_003895)	NM_003895	-1	8867	NM_003895	SYNJ1	1.8679
chr14	65007321	65007634	3_NTT1_cutoff_0.02_peak_6013	50.9	14	7.61e-14	3.64	0.274725	UP	promoter-TSS (NR_110550)	NM_021979	292	3306	NM_021979	HSPA2	1.86394
chr1	28879216	28879952	1_NT1_cutoff_0.02_peak_588	261.5	72	4.31e-66	3.63	0.275482	UP	promoter-TSS (NR_003109)	NM_017846	55	54952	NM_017846	TRNAU1AP	1.85997
chr17	41381707	41382436	3_NTT1_cutoff_0.02_peak_8660	740.5	204	9.61e-184	3.63	0.275482	UP	Intergenic	NR_047479	-1010	100874261	NR_047479	LINC00854	1.85997
chr9	123883795	123884269	1_NT1_cutoff_0.02_peak_25949	69	19	7.69e-19	3.63	0.275482	UP	promoter-TSS (NM_001330762)	NM_001330762	-16	11064	NM_007018	CNTRL	1.85997
chr14	90722689	90723161	1_NT1_cutoff_0.02_peak_8256	183	51	8.9e-46	3.59	0.278552	UP	promoter-TSS (NM_002802)	NM_002802	31	5700	NM_002802	PSMC1	1.84398
chr14	103851629	103851960	1_NT1_cutoff_0.02_peak_8368	176.1	49	1.09e-44	3.59	0.278552	UP	promoter-TSS (NM_001128919)	NM_001128918	94	4140	NM_002376	MARK3	1.84398
chr15	67546762	67547089	1_NT1_cutoff_0.02_peak_8845	179.5	50	3.12e-45	3.59	0.278552	UP	promoter-TSS (NM_001284347)	NM_001271886	148	79719	NM_024666	AAGAB	1.84398
chr17	3539356	3539659	1_NT1_cutoff_0.02_peak_10495	154.5	43	3.39e-39	3.59	0.278552	UP	promoter-TSS (NM_004937)	NM_013276	108	23729	NM_013276	SHPK	1.84398
chr3	186288396	186288695	1_NT1_cutoff_0.02_peak_19361	157.9	44	9.66e-40	3.59	0.278552	UP	promoter-TSS (NM_001134415)	NM_016306	81	51726	NM_016306	DNAJB11	1.84398
chr2	44588413	44588756	1_NT1_cutoff_0.02_peak_14945	100.1	28	5.32e-26	3.58	0.27933	UP	promoter-TSS (NM_006036)	NM_001171606	115	9581	NM_006036	PREPL	1.83996
chr2	175260347	175260671	1_NT1_cutoff_0.02_peak_15685	150.2	42	4.28e-38	3.58	0.27933	UP	promoter-TSS (NM_001193528)	NM_024583	52	79634	NM_024583	SCRN3	1.83996
chrX	69353678	69353899	3_NTT1_cutoff_0.02_peak_19609	75.1	21	6.18e-20	3.58	0.27933	UP	5' UTR (NM_001551, exon 2 of 7)	NM_001551	471	3476	NM_001551	IGBP1	1.83996
chr2	71558887	71559141	1_NT1_cutoff_0.02_peak_15137	185.6	52	2.54e-46	3.57	0.280112	UP	intron (NM_014497, intron 1 of 27)	NM_014497	129	27332	NM_014497	ZNF638	1.83592
chr11	93453798	93454057	3_NTT1_cutoff_0.02_peak_4020	28.5	8	2.93e-08	3.56	0.280899	UP	promoter-TSS (NR_002569)	NR_002569	-752	619383	NR_002569	SCARNA9	1.83188
chr19	45971095	45971457	1_NT1_cutoff_0.02_peak_14109	405.7	114	7.03e-99	3.56	0.280899	UP	promoter-TSS (NM_006732)	NM_001114171	23	2354	NM_006732	FOSB	1.83188
chr19	48018133	48018362	1_NT1_cutoff_0.02_peak_14186	164	46	7.81e-41	3.56	0.280899	UP	non-coding (NR_038456, exon 1 of 12)	NR_038457	267	8775	NM_003827	NAPA	1.83188
chr5	78908247	78908472	1_NT1_cutoff_0.02_peak_20689	110.5	31	3.37e-28	3.56	0.280899	UP	5' UTR (NM_001349549, exon 1 of 15)	NM_173797	120	167153	NM_173797	TENT2	1.83188
chr11	33795889	33796195	1_NT1_cutoff_0.02_peak_4508	109.6	31	1.2e-27	3.54	0.282486	UP	promoter-TSS (NM_012175)	NM_012175	29	26273	NM_012175	FBXO3	1.82375
chr2	88926768	88927081	1_NT1_cutoff_0.02_peak_15267	67.3	19	1.01e-17	3.54	0.282486	UP	promoter-TSS (NR_135540)	NM_004836	169	9451	NM_004836	EIF2AK3	1.82375
chr17	37558855	37559069	3_NTT1_cutoff_0.02_peak_8544	45.7	13	3.52e-12	3.52	0.284091	UP	Intergenic	NM_032875	-1053	84961	NM_032875	FBXL20	1.81558
chr12	56211243	56211656	1_NT1_cutoff_0.02_peak_6224	185.6	53	3.19e-45	3.5	0.285714	UP	promoter-TSS (NR_026722)	NM_033082	90	84324	NM_033082	SARNP	1.80735
chr14	74551503	74551838	3_NTT1_cutoff_0.02_peak_6125	69.9	20	9.93e-18	3.5	0.285714	UP	promoter-TSS (NM_001024674)	NM_001024674	15	91750	NM_001024674	LIN52	1.80735
chr10	103113835	103114106	1_NT1_cutoff_0.02_peak_3824	83.7	24	4.83e-21	3.49	0.286533	UP	exon (NM_033637, exon 1 of 15)	NM_001256856	181	8945	NM_003939	BTRC	1.80323
chr15	101142741	101142959	1_NT1_cutoff_0.02_peak_9214	80.3	23	1.73e-20	3.49	0.286533	UP	promoter-TSS (NM_001352508)	NM_198243	95	140460	NM_024708	ASB7	1.80323
chr9	34620321	34620535	1_NT1_cutoff_0.02_peak_25461	83.7	24	4.83e-21	3.49	0.286533	UP	promoter-TSS (NM_024348)	NM_001281425	92	11258	NM_007234	DCTN3	1.80323
chr1	28559294	28559668	1_NT1_cutoff_0.02_peak_572	132.1	38	1.33e-32	3.48	0.287356	UP	promoter-TSS (NM_014280)	NM_014280	61	22826	NM_014280	DNAJC8	1.79909
chr6_dbb_hap3	3068730	3069201	3_NTT1_cutoff_0.02_peak_16982	94.1	27	8.52e-24	3.48	0.287356	UP	promoter-TSS (NM_005345).4	NM_005345	88	3303	NM_005345	HSPA1A	1.79909
chr17	30771370	30771733	1_NT1_cutoff_0.02_peak_11058	252.9	73	4.91e-60	3.46	0.289017	UP	promoter-TSS (NM_001270482)	NM_001270482	71	5717	NM_002815	PSMD11	1.79077
chr1	156211169	156212104	3_NTT1_cutoff_0.02_peak_1638	172.6	50	2.12e-41	3.45	0.289855	UP	promoter-TSS (NM_199173)	NM_199173	-116	632	NM_199173	BGLAP	1.7866
chr1	226012225	226012555	3_NTT1_cutoff_0.02_peak_2256	44.9	13	1.23e-11	3.45	0.289855	UP	promoter-TSS (NM_000120)	NM_000120	-612	2052	NM_000120	EPHX1	1.7866
chr10	114206902	114207115	1_NT1_cutoff_0.02_peak_3967	100.1	29	6.63e-25	3.45	0.289855	UP	promoter-TSS (NM_001351086)	NM_001318203	263	143187	NM_145206	VTI1A	1.7866
chr19	39616358	39616611	1_NT1_cutoff_0.02_peak_13860	93.2	27	2.98e-23	3.45	0.289855	UP	promoter-TSS (NM_005884)	NM_005884	65	10298	NM_005884	PAK4	1.7866
chr2	169746676	169747105	3_NTT1_cutoff_0.02_peak_11766	24.2	7	3.89e-07	3.45	0.289855	UP	promoter-TSS (NM_020675)	NM_020675	53	57405	NM_020675	SPC25	1.7866
chr22	30752698	30753014	1_NT1_cutoff_0.02_peak_17557	202.8	59	5.4e-48	3.44	0.290698	UP	promoter-TSS (NM_005877)	NM_005877	80	10291	NM_005877	SF3A1	1.78241
chr19	33462654	33462986	1_NT1_cutoff_0.02_peak_13666	140.7	41	1.01e-33	3.43	0.291545	UP	promoter-TSS (NM_001300978)	NM_032816	115	84902	NM_032816	CEP89	1.77821
chr2	242089849	242090110	1_NT1_cutoff_0.02_peak_16202	133.8	39	4.47e-32	3.43	0.291545	UP	promoter-TSS (NM_001252120)	NM_001252120	-586	23178	NM_015148	PASK	1.77821
chr20	57464095	57464457	1_NT1_cutoff_0.02_peak_16911	239.9	70	3.15e-56	3.43	0.291545	UP	promoter-TSS (NR_126334)	NM_001309840	96	2778	NM_000516	GNAS	1.77821
chr3	79068420	79068699	1_NT1_cutoff_0.02_peak_18678	130.3	38	1.61e-31	3.43	0.291545	UP	promoter-TSS (NM_001145845)	NM_001145845	49	6091	NM_002941	ROBO1	1.77821
chr12	109914922	109915607	1_NT1_cutoff_0.02_peak_6821	277.1	81	5.42e-65	3.42	0.292398	UP	promoter-TSS (NM_031954)	NM_001317399	84	83892	NM_031954	KCTD10	1.774
chr16	57220160	57220424	1_NT1_cutoff_0.02_peak_9974	99.3	29	2.3e-24	3.42	0.292398	UP	promoter-TSS (NM_001354089)	NM_001305182	96	89970	NM_133368	RSPRY1	1.774
chr7	138915902	138916116	1_NT1_cutoff_0.02_peak_24121	88.9	26	1.28e-21	3.42	0.292398	UP	promoter-TSS (NM_173569)	NM_173569	-222	254048	NM_173569	UBN2	1.774
chr2	198299538	198300208	1_NT1_cutoff_0.02_peak_15827	388.4	114	1.16e-89	3.41	0.293255	UP	promoter-TSS (NM_012433)	NM_012433	-56	23451	NM_012433	SF3B1	1.76977
chr4	13485731	13486064	1_NT1_cutoff_0.02_peak_19639	132.9	39	1.53e-31	3.41	0.293255	UP	promoter-TSS (NM_001159601)	NM_004249	91	9364	NM_004249	RAB28	1.76977
chr1	115212552	115212796	3_NTT1_cutoff_0.02_peak_1227	61.3	18	1.57e-15	3.4	0.294118	UP	promoter-TSS (NM_198459)	NM_198459	58	163259	NM_198459	DENND2C	1.76553
chr1	16010611	16010944	3_NTT1_cutoff_0.02_peak_138	149.3	44	2.16e-35	3.39	0.294985	UP	promoter-TSS (NM_015164)	NM_015164	-20	23207	NM_015164	PLEKHM2	1.76129
chr12	124155577	124155835	1_NT1_cutoff_0.02_peak_7070	50.9	15	9.06e-13	3.39	0.294985	UP	promoter-TSS (NM_001143850)	NM_001143850	46	79867	NM_024809	TCTN2	1.76129
chr17	73662877	73663690	1_NT1_cutoff_0.02_peak_11926	376.3	111	2.11e-86	3.39	0.294985	UP	promoter-TSS (NR_126037)	NM_004259	-15	9400	NM_004259	RECQL5	1.76129
chr20	14318007	14318310	1_NT1_cutoff_0.02_peak_16375	101.8	30	2.17e-24	3.39	0.294985	UP	5' UTR (NM_013281, exon 1 of 2)	NM_198391	154	23767	NM_013281	FLRT3	1.76129
chr20	30539508	30539942	1_NT1_cutoff_0.02_peak_16505	186.4	55	1.22e-43	3.39	0.294985	UP	exon (NM_030815, exon 1 of 5)	NM_030815	158	81572	NM_030815	PDRG1	1.76129
chr7	100172226	100173300	3_NTT1_cutoff_0.02_peak_17649	91.5	27	3.53e-22	3.39	0.294985	UP	promoter-TSS (NM_001289933)	NM_001289933	-407	101927655	NM_001289933	ZASP	1.76129
chr11	819317	820351	1_NT1_cutoff_0.02_peak_4222	351.3	104	2.12e-80	3.38	0.295858	UP	exon (NM_020376, exon 2 of 10)	NM_020376	933	57104	NM_020376	PNPLA2	1.75702
chr12	110151514	110151771	1_NT1_cutoff_0.02_peak_6823	118.2	35	3.02e-28	3.38	0.295858	UP	promoter-TSS (NM_032829)	NM_032829	-544	84915	NM_032829	FAM222A	1.75702
chr6	43596648	43597104	1_NT1_cutoff_0.02_peak_22095	235.6	70	4.2e-54	3.37	0.296736	UP	promoter-TSS (NM_001003690)	NM_019096	107	54676	NM_019096	GTPBP2	1.75275
chr7	75157240	75157804	1_NT1_cutoff_0.02_peak_23577	208.9	62	4.59e-48	3.37	0.296736	UP	promoter-TSS (NR_028059)	NR_028059	-69	5387	NM_005395	PMS2P3	1.75275
chr6	28219899	28220206	3_NTT1_cutoff_0.02_peak_16330	97.5	29	2.67e-23	3.36	0.297619	UP	promoter-TSS (NM_019110)	NM_019110	21	387032	NM_019110	ZKSCAN4	1.74846
chr1	169337294	169337708	1_NT1_cutoff_0.02_peak_2240	224.4	67	2.23e-51	3.35	0.298507	UP	promoter-TSS (NR_104229)	NM_197972	-300	29922	NM_013330	NME7	1.74416
chr10	120101601	120101998	3_NTT1_cutoff_0.02_peak_3108	144.1	43	8.97e-34	3.35	0.298507	UP	promoter-TSS (NM_001134672)	NM_001134672	39	63877	NM_022063	FAM204A	1.74416
chr11	34938055	34938339	1_NT1_cutoff_0.02_peak_4518	133.8	40	4.82e-31	3.34	0.299401	UP	promoter-TSS (NM_015957)	NM_015957	-239	51074	NM_015957	APIP	1.73985
chr19	57900961	57901240	1_NT1_cutoff_0.02_peak_14503	150.2	45	6.84e-35	3.34	0.299401	UP	promoter-TSS (NM_152909)	NM_001172773	-117	147694	NM_152909	ZNF548	1.73985
chr2	27886187	27886905	1_NT1_cutoff_0.02_peak_14815	230.4	69	1.71e-52	3.34	0.299401	UP	5' UTR (NM_014860, exon 1 of 6)	NM_014860	161	9913	NM_014860	SUPT7L	1.73985
chr6	43655224	43655807	1_NT1_cutoff_0.02_peak_22100	233.9	70	4.73e-53	3.34	0.299401	UP	promoter-TSS (NM_018135)	NM_001193343	33	55168	NM_018135	MRPS18A	1.73985
chr9	34178847	34179283	1_NT1_cutoff_0.02_peak_25454	180.4	54	1.7e-41	3.34	0.299401	UP	promoter-TSS (NM_001171202)	NM_001171201	62	51271	NM_016525	UBAP1	1.73985
chr2	198317673	198318080	1_NT1_cutoff_0.02_peak_15828	166.6	50	3.27e-38	3.33	0.3003	UP	promoter-TSS (NM_001320819)	NM_025147	-270	80219	NM_025147	COQ10B	1.73552
chr5	171433878	171434260	1_NT1_cutoff_0.02_peak_21317	259.8	78	1.46e-58	3.33	0.3003	UP	promoter-TSS (NM_033645)	NM_033645	-192	23291	NM_012300	FBXW11	1.73552
chr20	56884665	56884982	1_NT1_cutoff_0.02_peak_16903	172.6	52	2.48e-39	3.32	0.301205	UP	promoter-TSS (NR_003505)	NM_020673	53	57403	NM_020673	RAB22A	1.73118
chr21	40752282	40752516	3_NTT1_cutoff_0.02_peak_12925	43.2	13	4.2e-11	3.32	0.301205	UP	promoter-TSS (NM_001350296)	NM_001350295	15	7485	NM_004627	WRB	1.73118
chr5	53606225	53606737	1_NT1_cutoff_0.02_peak_20508	544.6	164	1.35e-120	3.32	0.301205	UP	promoter-TSS (NM_019087)	NM_019087	-78	54622	NM_019087	ARL15	1.73118
chr5	132361901	132362362	1_NT1_cutoff_0.02_peak_20884	246	74	2.77e-55	3.32	0.301205	UP	intron (NM_001300816, intron 1 of 4)	NM_001308129	164	54819	NM_017665	ZCCHC10	1.73118
chr1	27648559	27648969	1_NT1_cutoff_0.02_peak_548	158.8	48	4.76e-36	3.31	0.302115	UP	non-coding (NR_037576, exon 1 of 7)	NR_037580	128	84065	NM_032125	TMEM222	1.72683
chr11	11863284	11863716	1_NT1_cutoff_0.02_peak_4399	281.4	85	5.42e-63	3.31	0.302115	UP	5' UTR (NM_017944, exon 1 of 27)	NM_001282659	530	55031	NM_017944	USP47	1.72683
chr12	58240842	58241027	3_NTT1_cutoff_0.02_peak_4684	39.7	12	5.25e-10	3.31	0.302115	UP	promoter-TSS (NM_005730)	NM_005730	-188	10106	NM_005730	CTDSP2	1.72683
chr5	94417192	94417496	1_NT1_cutoff_0.02_peak_20730	139	42	1.21e-31	3.31	0.302115	UP	5' UTR (NM_001297777, exon 1 of 20)	NM_001297777	226	79772	NM_024717	MCTP1	1.72683
chr5	132208842	132209295	3_NTT1_cutoff_0.02_peak_15500	59.6	18	1.8e-14	3.31	0.302115	UP	promoter-TSS (NM_052971)	NM_052971	-289	116842	NM_052971	LEAP2	1.72683
chr1	160312862	160313395	1_NT1_cutoff_0.02_peak_2143	548.1	166	1.14e-120	3.3	0.30303	UP	promoter-TSS (NM_001290184)	NM_001349729	66	23385	NM_015331	NCSTN	1.72247
chr17	27169599	27170026	1_NT1_cutoff_0.02_peak_10930	138.1	42	1.21e-31	3.29	0.303951	UP	promoter-TSS (NM_001077498)	NM_001288635	44	55731	NM_018182	FAM222B	1.71809
chr8	67579705	67580022	1_NT1_cutoff_0.02_peak_24631	88.9	27	1.32e-20	3.29	0.303951	UP	promoter-TSS (NM_019607)	NM_001204173	77	100533105	NM_001204173	C8orf44-SGK3	1.71809
chr17	17380227	17380520	1_NT1_cutoff_0.02_peak_10802	107.9	33	1.65e-24	3.27	0.30581	UP	promoter-TSS (NM_018019)	NM_018019	74	55090	NM_018019	MED9	1.70929
chr1	100715207	100715517	1_NT1_cutoff_0.02_peak_1436	123.4	38	7.66e-28	3.25	0.307692	UP	promoter-TSS (NM_001918)	NM_001918	47	1629	NM_001918	DBT	1.70044
chr12	108954798	108955055	1_NT1_cutoff_0.02_peak_6809	156.2	48	5.15e-35	3.25	0.307692	UP	promoter-TSS (NM_001320042)	NM_014706	238	9733	NM_014706	SART3	1.70044
chr17	77813104	77813410	1_NT1_cutoff_0.02_peak_12079	321.9	99	8.53e-70	3.25	0.307692	UP	promoter-TSS (NM_003655)	NM_003655	-44	8535	NM_003655	CBX4	1.70044
chr19	58280882	58281286	3_NTT1_cutoff_0.02_peak_10917	97.5	30	2.67e-22	3.25	0.307692	UP	promoter-TSS (NM_017652)	NM_001077426	64	54807	NM_017652	ZNF586	1.70044
chr11	73881774	73882029	1_NT1_cutoff_0.02_peak_5168	90.6	28	1.18e-20	3.24	0.308642	UP	promoter-TSS (NM_001271593)	NM_001286577	162	26005	NM_015531	C2CD3	1.69599
chr16	89723902	89724191	1_NT1_cutoff_0.02_peak_10369	177.8	55	5.94e-39	3.23	0.309598	UP	promoter-TSS (NM_001271908)	NM_153025	-105	124045	NM_153025	SPATA33	1.69153
chr17	17875627	17875800	1_NT1_cutoff_0.02_peak_10818	61.3	19	1.6e-14	3.23	0.309598	UP	promoter-TSS (NM_001130092)	NM_001350333	70	146691	NM_144678	TOM1L2	1.69153
chr19	7694690	7694874	1_NT1_cutoff_0.02_peak_13109	151.9	47	1.99e-33	3.23	0.309598	UP	promoter-TSS (NM_020196)	NR_033242	111	100131801	NM_001171155	PET100	1.69153
chr21	46707961	46708176	1_NT1_cutoff_0.02_peak_17326	74.2	23	2.62e-17	3.23	0.309598	UP	promoter-TSS (NR_148026)	NR_026943	102	642852	NR_026943	LOC642852	1.69153
chr5	137548852	137549068	1_NT1_cutoff_0.02_peak_20969	151.9	47	1.99e-33	3.23	0.309598	UP	promoter-TSS (NM_004661)	NM_004661	72	8697	NM_004661	CDC23	1.69153
chr5	68530600	68531073	1_NT1_cutoff_0.02_peak_20607	154.5	48	5.44e-34	3.22	0.310559	UP	exon (NM_001799, exon 1 of 12)	NM_001324078	215	1022	NM_001799	CDK7	1.68706
chr1	224518032	224518431	1_NT1_cutoff_0.02_peak_2724	279.6	87	5.32e-60	3.21	0.311526	UP	promoter-TSS (NM_001243147)	NM_001243147	-341	4931	NM_002533	NVL	1.68257
chr1	224517613	224517955	1_NT1_cutoff_0.02_peak_2723	281.4	88	4.68e-60	3.2	0.3125	UP	exon (NM_001243147, exon 1 of 22)	NM_206840	107	4931	NM_002533	NVL	1.67807
chr16	71929774	71930029	1_NT1_cutoff_0.02_peak_10194	54.4	17	7.19e-13	3.2	0.3125	UP	intron (NM_001270979, intron 1 of 5)	NM_001270977	506	9798	NM_014761	IST1	1.67807
chr17	34842287	34842721	1_NT1_cutoff_0.02_peak_11098	127.7	40	5.93e-28	3.19	0.31348	UP	promoter-TSS (NR_104010)	NM_001281433	33	9326	NM_004773	ZNHIT3	1.67356
chr3	69101253	69101764	1_NT1_cutoff_0.02_peak_18657	213.2	67	1.04e-45	3.18	0.314465	UP	promoter-TSS (NM_007114)	NM_007114	-25	7110	NM_007114	TMF1	1.66903
chr8	9413041	9413678	1_NT1_cutoff_0.02_peak_24297	190.7	60	9.3e-41	3.18	0.314465	UP	promoter-TSS (NM_003747)	NM_003747	-85	8658	NM_003747	TNKS	1.66903
chr9	123605038	123605324	1_NT1_cutoff_0.02_peak_25942	226.1	71	1.81e-48	3.18	0.314465	UP	promoter-TSS (NR_024408)	NM_001270427	118	5711	NM_005047	PSMD5	1.66903
chr19	12722211	12722422	1_NT1_cutoff_0.02_peak_13297	88.9	28	1.21e-19	3.17	0.315457	UP	promoter-TSS (NM_020714)	NM_153358	585	163049	NM_153358	ZNF791	1.66448
chr8	28747853	28748077	1_NT1_cutoff_0.02_peak_24451	117.4	37	9.43e-26	3.17	0.315457	UP	promoter-TSS (NM_001324390)	NR_136757	78	79618	NM_024567	HMBOX1	1.66448
chr12	49392496	49392674	3_NTT1_cutoff_0.02_peak_4425	19	6	5.69e-05	3.16	0.316456	UP	intron (NR_147179, intron 1 of 1)	NR_147179	455	105369758	NR_147178	DDN-AS1	1.65992
chr12	122710401	122710713	1_NT1_cutoff_0.02_peak_7007	189.9	60	2.95e-40	3.16	0.316456	UP	promoter-TSS (NR_103497)	NM_001278304	-160	56616	NM_019887	DIABLO	1.65992
chr3	52232035	52232353	1_NT1_cutoff_0.02_peak_18524	148.5	47	6.53e-32	3.16	0.316456	UP	promoter-TSS (NM_001304443)	NM_001304444	95	211	NM_000688	ALAS1	1.65992
chr3	128879758	128879985	1_NT1_cutoff_0.02_peak_18873	123.4	39	6.96e-27	3.16	0.316456	UP	5' UTR (NM_001199469, exon 1 of 12)	NM_001204890	201	100534599	NM_001204890	ISY1-RAB43	1.65992
chr4	85887623	85888004	3_NTT1_cutoff_0.02_peak_14866	123.4	39	6.96e-27	3.16	0.316456	UP	promoter-TSS (NM_014991)	NR_152776	-71	404201	NM_205857	WDFY3-AS2	1.65992
chr9	99801223	99801613	3_NTT1_cutoff_0.02_peak_18980	38	12	5.52e-09	3.16	0.316456	UP	5' UTR (NM_001333, exon 1 of 8)	NM_001333	174	1515	NM_001333	CTSV	1.65992
chr14	67826249	67826594	1_NT1_cutoff_0.02_peak_8073	151	48	1.78e-32	3.15	0.31746	UP	promoter-TSS (NM_004094)	NM_015994	298	51382	NM_015994	ATP6V1D	1.65535
chr14	102606183	102606461	1_NT1_cutoff_0.02_peak_8333	126	40	1.89e-27	3.15	0.31746	UP	promoter-TSS (NM_001017963)	NM_181291	133	91833	NM_144574	WDR20	1.65535
chr15	65134107	65134258	1_NT1_cutoff_0.02_peak_8819	82	26	5.28e-18	3.15	0.31746	UP	5' UTR (NM_025201, exon 1 of 6)	NM_025201	101	80301	NM_025201	PLEKHO2	1.65535
chr19	40931294	40932309	1_NT1_cutoff_0.02_peak_13890	1112.5	353	5.37e-227	3.15	0.31746	UP	5' UTR (NM_013376, exon 1 of 2)	NM_013376	130	29950	NM_013376	SERTAD1	1.65535
chr10	6244768	6245234	1_NT1_cutoff_0.02_peak_3092	410.8	131	2.94e-84	3.14	0.318471	UP	5' UTR (NM_001314063, exon 1 of 16)	NM_001314063	161	5209	NM_004566	PFKFB3	1.65076
chr10	81838747	81839260	3_NTT1_cutoff_0.02_peak_2902	176.1	56	1.69e-37	3.14	0.318471	UP	promoter-TSS (NM_001270374)	NR_072987	3	80195	NM_025125	TMEM254	1.65076
chr19	6530676	6531226	1_NT1_cutoff_0.02_peak_13071	341.8	109	2.24e-70	3.14	0.318471	UP	promoter-TSS (NM_003811)	NM_003811	-59	8744	NM_003811	TNFSF9	1.65076
chr3	133380569	133381030	1_NT1_cutoff_0.02_peak_18945	247.7	79	1.78e-51	3.14	0.318471	UP	promoter-TSS (NM_001354703)	NM_001354703	-30	7018	NM_001063	TF	1.65076
chr11	123986062	123986230	3_NTT1_cutoff_0.02_peak_4168	59.6	19	1.65e-13	3.13	0.319489	UP	promoter-TSS (NM_014622)	NM_014622	35	4013	NM_014622	VWA5A	1.64616
chr18	32869995	32870593	1_NT1_cutoff_0.02_peak_12475	200.2	64	5.13e-42	3.13	0.319489	UP	promoter-TSS (NM_001112734)	NR_024565	58	10778	NM_006629	ZNF271P	1.64616
chr3	32543993	32544443	3_NTT1_cutoff_0.02_peak_13585	84.6	27	1.42e-18	3.13	0.319489	UP	exon (NM_017801, exon 1 of 4)	NM_017801	185	54918	NM_017801	CMTM6	1.64616
chr4	153273552	153273966	3_NTT1_cutoff_0.02_peak_15071	84.6	27	1.42e-18	3.13	0.319489	UP	exon (NM_018315, exon 1 of 11)	NM_018315	351	55294	NM_018315	FBXW7	1.64616
chr5	137674749	137675383	3_NTT1_cutoff_0.02_peak_15618	84.6	27	1.42e-18	3.13	0.319489	UP	intron (NM_001350194, intron 1 of 4)	NM_001287583	-1022	995	NM_001790	CDC25C	1.64616
chr17	76355841	76356300	1_NT1_cutoff_0.02_peak_12058	277.9	89	4.06e-57	3.12	0.320513	UP	promoter-TSS (NR_110845)	NM_003955	89	9021	NM_003955	SOCS3	1.64155
chr18	12702917	12703273	1_NT1_cutoff_0.02_peak_12392	137.2	44	3.24e-29	3.12	0.320513	UP	promoter-TSS (NM_001271989)	NM_020232	108	56984	NM_020232	PSMG2	1.64155
chr20	34286528	34286936	3_NTT1_cutoff_0.02_peak_12474	56.1	18	6.16e-13	3.12	0.320513	UP	promoter-TSS (NM_080748)	NM_080748	-500	140823	NM_080748	ROMO1	1.64155
chr22	39190024	39190271	3_NTT1_cutoff_0.02_peak_13245	56.1	18	6.16e-13	3.12	0.320513	UP	promoter-TSS (NM_005740)	NM_005740	13	10126	NM_005740	DNAL4	1.64155
chr1	173792161	173792329	3_NTT1_cutoff_0.02_peak_1829	15.5	5	0.000226	3.11	0.321543	UP	intron (NM_001171182, intron 1 of 4)	NM_001171182	1025	91687	NM_033319	CENPL	1.63691
chr10	65225582	65225808	1_NT1_cutoff_0.02_peak_3449	71.6	23	8.51e-16	3.11	0.321543	UP	promoter-TSS (NM_032776)	NM_001322252	66	221037	NM_004241	JMJD1C	1.63691
chr2	230785878	230787139	1_NT1_cutoff_0.02_peak_16101	488.5	157	6.7e-99	3.11	0.321543	UP	promoter-TSS (NM_001348318)	NM_001348324	-114	9320	NM_004238	TRIP12	1.63691
chr5	74807639	74807883	1_NT1_cutoff_0.02_peak_20671	102.7	33	5.5e-22	3.11	0.321543	UP	promoter-TSS (NM_031361)	NM_001130105	45	10087	NM_005713	COL4A3BP	1.63691
chr7	17979934	17980417	1_NT1_cutoff_0.02_peak_23134	254.6	82	3.52e-52	3.11	0.321543	UP	promoter-TSS (NM_001350865)	NM_001350865	-45				1.63691
chr1	145096314	145096629	1_NT1_cutoff_0.02_peak_1587	173.5	56	5.21e-36	3.1	0.322581	UP	promoter-TSS (NM_004892)	NM_004892	65	9554	NM_004892	SEC22B	1.63227
chr14	21945194	21945831	3_NTT1_cutoff_0.02_peak_5680	179.5	58	3.85e-37	3.1	0.322581	UP	promoter-TSS (NR_028074)	NM_014828	178	9878	NM_014828	TOX4	1.63227
chr14	64009899	64010551	1_NT1_cutoff_0.02_peak_8038	297.8	96	1.42e-60	3.1	0.322581	UP	promoter-TSS (NM_001354926)	NM_006246	-112	5529	NM_006246	PPP2R5E	1.63227
chr14	69618199	69618904	3_NTT1_cutoff_0.02_peak_6047	83.7	27	4.45e-18	3.1	0.322581	UP	intron (NM_003861, intron 1 of 8)	NM_001284207	764	8816	NM_003861	DCAF5	1.63227
chr14	75469243	75469841	1_NT1_cutoff_0.02_peak_8180	208	67	3.24e-43	3.1	0.322581	UP	promoter-TSS (NM_014239)	NM_014239	-70	8892	NM_014239	EIF2B2	1.63227
chr19	9945884	9946223	1_NT1_cutoff_0.02_peak_13163	192.5	62	6.77e-40	3.1	0.322581	UP	exon (NM_006221, exon 1 of 4)	NM_006221	171	5300	NM_006221	PIN1	1.63227
chr3	9691086	9691360	1_NT1_cutoff_0.02_peak_18101	120.8	39	2.15e-25	3.1	0.322581	UP	5' UTR (NM_022485, exon 1 of 17)	NM_001077526	106	64419	NM_022485	MTMR14	1.63227
chr4	175204461	175204860	1_NT1_cutoff_0.02_peak_20268	83.7	27	4.45e-18	3.1	0.322581	UP	promoter-TSS (NM_001145314)	NM_001040157	-167	80817	NM_030633	CEP44	1.63227
chr11	9335937	9336281	1_NT1_cutoff_0.02_peak_4343	111.3	36	1.09e-23	3.09	0.323625	UP	non-coding (NR_028491, exon 1 of 8)	NM_015012	206	440026	NM_015012	TMEM41B	1.62761
chr11	68227878	68228638	1_NT1_cutoff_0.02_peak_5079	240.8	78	6.13e-49	3.09	0.323625	UP	promoter-TSS (NM_001352359)	NM_001352359	72	55291	NM_018312	PPP6R3	1.62761
chr9	127177478	127177835	1_NT1_cutoff_0.02_peak_25971	182.1	59	1.05e-37	3.09	0.323625	UP	promoter-TSS (NM_002799)	NM_002799	95	5695	NM_002799	PSMB7	1.62761
chr10	126107178	126107734	1_NT1_cutoff_0.02_peak_4060	492.8	160	3.9e-98	3.08	0.324675	UP	promoter-TSS (NM_001322968)	NM_001322974	89	4942	NM_000274	OAT	1.62293
chr17	56595583	56595945	3_NTT1_cutoff_0.02_peak_8844	64.7	21	3.69e-14	3.08	0.324675	UP	promoter-TSS (NM_004687)	NM_004687	-513	9110	NM_004687	MTMR4	1.62293
chr3	129117896	129118481	3_NTT1_cutoff_0.02_peak_14099	120	39	6.65e-25	3.08	0.324675	UP	promoter-TSS (NR_003111)	NR_003111	93	132241	NR_003111	RPL32P3	1.62293
chr7	6746327	6746833	1_NT1_cutoff_0.02_peak_23108	277.1	90	3.31e-56	3.08	0.324675	UP	promoter-TSS (NM_016265)	NM_016265	-14	7559	NM_006956	ZNF12	1.62293
chr10	104262066	104262577	1_NT1_cutoff_0.02_peak_3875	126	41	1.58e-26	3.07	0.325733	UP	intron (NM_005736, intron 1 of 10)	NM_005736	190	10121	NM_005736	ACTR1A	1.61824
chr14	73924968	73925386	1_NT1_cutoff_0.02_peak_8141	147.6	48	1.69e-30	3.07	0.325733	UP	intron (NM_001320114, intron 1 of 11)	NM_001005744	109	8650	NM_003744	NUMB	1.61824
chr16	69419552	69420081	1_NT1_cutoff_0.02_peak_10139	224.4	73	1.27e-45	3.07	0.325733	UP	promoter-TSS (NM_005652)	NM_005652	74	7014	NM_005652	TERF2	1.61824
chr20	61915815	61916144	3_NTT1_cutoff_0.02_peak_12776	27.6	9	9.64e-07	3.07	0.325733	UP	non-coding (NR_104023, exon 1 of 4)	NR_104023	513	55738	NM_018209	ARFGAP1	1.61824
chr8	142010324	142010668	3_NTT1_cutoff_0.02_peak_18518	55.2	18	1.93e-12	3.07	0.325733	UP	intron (NM_001352737, intron 1 of 32)	NM_001352710	648	5747	NM_005607	PTK2	1.61824
chr13	48669043	48669360	1_NT1_cutoff_0.02_peak_7325	174.3	57	1.35e-35	3.06	0.326797	UP	promoter-TSS (NM_001270629)	NM_014166	75	29079	NM_014166	MED4	1.61353
chr11	118938199	118938685	1_NT1_cutoff_0.02_peak_5439	151.9	50	1.17e-30	3.04	0.328947	UP	promoter-TSS (NM_021729)	NM_021729	-21	55823	NM_021729	VPS11	1.60407
chr14	93214794	93215108	1_NT1_cutoff_0.02_peak_8278	157.9	52	8.56e-32	3.04	0.328947	UP	promoter-TSS (NM_005606)	NM_005606	96	5641	NM_005606	LGMN	1.60407
chr17	41561250	41561504	1_NT1_cutoff_0.02_peak_11381	133.8	44	2.95e-27	3.04	0.328947	UP	promoter-TSS (NM_001302623)	NM_001302623	92	1659	NM_004941	DHX8	1.60407
chr17	43567947	43568438	1_NT1_cutoff_0.02_peak_11449	133.8	44	2.95e-27	3.04	0.328947	UP	promoter-TSS (NM_014798)	NM_001352825	-47	9842	NM_014798	PLEKHM1	1.60407
chr2	27851668	27852200	1_NT1_cutoff_0.02_peak_14814	191.6	63	1.65e-38	3.04	0.328947	UP	promoter-TSS (NR_026735)	NM_024584	-36	79635	NM_024584	CCDC121	1.60407
chr1	54518736	54519129	1_NT1_cutoff_0.02_peak_1122	112.2	37	2.79e-23	3.03	0.330033	UP	promoter-TSS (NR_130900)	NM_001305050	178	9528	NM_004872	TMEM59	1.59932
chr12	4647487	4647673	1_NT1_cutoff_0.02_peak_5606	100.1	33	5.25e-21	3.03	0.330033	UP	promoter-TSS (NM_001130862)	NR_144382	94	57102	NM_020374	C12orf4	1.59932
chr16	66785324	66785655	1_NT1_cutoff_0.02_peak_10007	142.4	47	5.86e-29	3.03	0.330033	UP	promoter-TSS (NM_001286157)	NM_001286157	35	1783	NM_006141	DYNC1LI2	1.59932
chrX	1710297	1710677	1_NT1_cutoff_0.02_peak_26367	100.1	33	5.25e-21	3.03	0.330033	UP	promoter-TSS (NM_005088)	NM_005088	1	8227	NM_005088	AKAP17A	1.59932
chr1	42928588	42929080	3_NTT1_cutoff_0.02_peak_659	72.5	24	2.17e-15	3.02	0.331126	UP	promoter-TSS (NM_001355227)	NM_001355224	-191	728621	NM_001080850	CCDC30	1.59455
chr1	145508985	145509184	3_NTT1_cutoff_0.02_peak_1283	24.2	8	3.73e-06	3.02	0.331126	UP	promoter-TSS (NR_147182)	NR_147182	-823	105371260	NR_147182	LIX1L-AS1	1.59455
chr1	202317842	202317995	1_NT1_cutoff_0.02_peak_2494	96.7	32	5.93e-20	3.02	0.331126	UP	promoter-TSS (NM_002481)	NM_001167857	89	4660	NM_002481	PPP1R12B	1.59455
chr10	13628918	13629131	1_NT1_cutoff_0.02_peak_3144	111.3	37	8.48e-23	3.01	0.332226	UP	promoter-TSS (NM_003675)	NM_003675	86	8559	NM_003675	PRPF18	1.58976
chr10	51623080	51623655	1_NT1_cutoff_0.02_peak_3412	336.6	112	3.03e-65	3.01	0.332226	UP	promoter-TSS (NR_073029)	NM_006327	18	100287932	NM_006327	TIMM23	1.58976
chr12	121454118	121454365	1_NT1_cutoff_0.02_peak_6970	93.2	31	2.2e-19	3.01	0.332226	UP	promoter-TSS (NR_104409)	NM_001286197	63	64897	NM_022895	C12orf43	1.58976
chr14	71067295	71067530	1_NT1_cutoff_0.02_peak_8128	93.2	31	2.2e-19	3.01	0.332226	UP	promoter-TSS (NM_001284211)	NM_005466	-6	10001	NM_005466	MED6	1.58976
chr16	3493324	3493802	1_NT1_cutoff_0.02_peak_9480	110.5	37	2.56e-22	2.99	0.334448	UP	promoter-TSS (NM_001317093)	NM_152457	-26	146434	NM_152457	ZNF597	1.58015
chrX	153656915	153657101	3_NTT1_cutoff_0.02_peak_19833	38.8	13	1.38e-08	2.99	0.334448	UP	promoter-TSS (NM_001183)	NM_001183	30	537	NM_001183	ATP6AP1	1.58015
chr11	6411653	6411823	1_NT1_cutoff_0.02_peak_4301	59.6	20	1.28e-12	2.98	0.33557	UP	promoter-TSS (NM_001318088)	NM_000543	94	6609	NM_000543	SMPD1	1.57531
chr12	57881734	57882069	1_NT1_cutoff_0.02_peak_6370	143.3	48	1.45e-28	2.98	0.33557	UP	exon (NM_004990, exon 1 of 21)	NM_004990	166	4141	NM_004990	MARS	1.57531
chr14	74416856	74417205	1_NT1_cutoff_0.02_peak_8157	145.9	49	1.17e-28	2.98	0.33557	UP	promoter-TSS (NM_152445)	NM_182476	76	51004	NM_182476	COQ6	1.57531
chr2	14772843	14773018	1_NT1_cutoff_0.02_peak_14677	59.6	20	1.28e-12	2.98	0.33557	UP	non-coding (NR_144632, exon 1 of 5)	NR_144632	124	151354	NM_145175	FAM84A	1.57531
chr2	85822415	85823045	1_NT1_cutoff_0.02_peak_15232	196.8	66	2.74e-38	2.98	0.33557	UP	promoter-TSS (NM_016494)	NM_016494	-107	51255	NM_016494	RNF181	1.57531
chr4	3486688	3486997	3_NTT1_cutoff_0.02_peak_14629	32.8	11	2e-07	2.98	0.33557	UP	intron (NM_001256896, intron 1 of 3)	NM_001256896	572	285489	NM_173660	DOK7	1.57531
chr4_gl000194_random	114894	115178	3_NTT1_cutoff_0.02_peak_15144	65.6	22	9.15e-14	2.98	0.33557	UP	promoter-TSS (NR_046442)	NR_046440	37	727764	NM_001190825	MAFIP	1.57531
chr10	75118568	75118739	3_NTT1_cutoff_0.02_peak_2841	26.8	9	2.94e-06	2.97	0.3367	UP	promoter-TSS (NM_145170)	NM_145170	-37	118491	NM_145170	CFAP70	1.57046
chr11	62456875	62457108	3_NTT1_cutoff_0.02_peak_3574	26.8	9	2.94e-06	2.97	0.3367	UP	TTS (NR_037949)	NM_203422	379	221091	NM_203422	LRRN4CL	1.57046
chr12	52445193	52445370	1_NT1_cutoff_0.02_peak_6042	80.3	27	1.27e-16	2.97	0.3367	UP	promoter-TSS (NM_002135)	NM_002135	96	3164	NM_002135	NR4A1	1.57046
chr3	50396731	50397088	1_NT1_cutoff_0.02_peak_18479	213.2	72	3.29e-41	2.96	0.337838	UP	promoter-TSS (NM_007024)	NM_007024	29	11070	NM_007024	TMEM115	1.5656
chr9	32526040	32526277	1_NT1_cutoff_0.02_peak_25395	62.1	21	3.42e-13	2.96	0.337838	UP	exon (NM_014314, exon 1 of 18)	NM_014314	163	23586	NM_014314	DDX58	1.5656
chr14	45430933	45431615	1_NT1_cutoff_0.02_peak_7889	176.9	60	6.02e-34	2.95	0.338983	UP	promoter-TSS (NM_001308112)	NM_017658	-95	54813	NM_017658	KLHL28	1.56071
chr17	3539878	3540223	1_NT1_cutoff_0.02_peak_10496	174.3	59	7.5e-34	2.95	0.338983	UP	promoter-TSS (NM_013276)	NM_004937	289	1497	NM_004937	CTNS	1.56071
chr2	54013897	54014466	1_NT1_cutoff_0.02_peak_14991	203.7	69	4.85e-39	2.95	0.338983	UP	promoter-TSS (NM_016115)	NM_145863	-36	51130	NM_016115	ASB3	1.56071
chr20	39317613	39318104	1_NT1_cutoff_0.02_peak_16723	353.9	120	1.92e-66	2.95	0.338983	UP	promoter-TSS (NM_005461)	NM_005461	21	9935	NM_005461	MAFB	1.56071
chr10	94050788	94051286	1_NT1_cutoff_0.02_peak_3686	150.2	51	2.56e-29	2.94	0.340136	UP	promoter-TSS (NM_014912)	NM_017824	117	54708	NM_017824	MARCH5	1.55582
chr16	81110860	81111099	1_NT1_cutoff_0.02_peak_10251	94.1	32	5.34e-19	2.94	0.340136	UP	promoter-TSS (NM_001100873)	NM_001100873	-108	123775	NM_152337	C16orf46	1.55582
chr2	219536510	219536930	1_NT1_cutoff_0.02_peak_16023	188.2	64	3.28e-36	2.94	0.340136	UP	promoter-TSS (NM_001243313)	NM_015690	-29	27148	NM_015690	STK36	1.55582
chr1	150980771	150980988	3_NTT1_cutoff_0.02_peak_1411	73.4	25	5.24e-15	2.93	0.341297	UP	promoter-TSS (NM_001303229)	NM_001303242	13	58497	NM_021222	PRUNE1	1.5509
chr12	6772165	6772377	1_NT1_cutoff_0.02_peak_5676	82	28	3e-16	2.93	0.341297	UP	promoter-TSS (NM_016162)	NM_001127586	37	51147	NM_016162	ING4	1.5509
chr16	71928921	71929718	1_NT1_cutoff_0.02_peak_10193	392.7	134	6.16e-73	2.93	0.341297	UP	promoter-TSS (NM_001270979)	NM_014761	-76	9798	NM_014761	IST1	1.5509
chr6	26458079	26458361	1_NT1_cutoff_0.02_peak_21773	67.3	23	7.29e-14	2.93	0.341297	UP	promoter-TSS (NM_078476)	NM_001197234	88	11120	NM_007049	BTN2A1	1.5509
chr6	150263037	150263209	3_NTT1_cutoff_0.02_peak_16849	44	15	9.61e-10	2.93	0.341297	UP	promoter-TSS (NM_025217)	NM_025217	49	80328	NM_025217	ULBP2	1.5509
chr7	104655358	104655652	1_NT1_cutoff_0.02_peak_23869	67.3	23	7.29e-14	2.93	0.341297	UP	promoter-TSS (NR_024586)	NM_182931	868	55904	NM_018682	KMT2E	1.5509
chr16	50059051	50059372	1_NT1_cutoff_0.02_peak_9922	122.6	42	9.59e-24	2.92	0.342466	UP	promoter-TSS (NM_153261)	NR_104042	95	255919	NM_153261	CNEP1R1	1.54597
chr19	1383787	1384136	1_NT1_cutoff_0.02_peak_12788	189.9	65	7.68e-36	2.92	0.342466	UP	promoter-TSS (NM_024407)	NM_024407	79	374291	NM_024407	NDUFS7	1.54597
chr3	57741934	57742364	1_NT1_cutoff_0.02_peak_18606	137.2	47	1.4e-26	2.92	0.342466	UP	promoter-TSS (NM_001304420)	NM_007159	-834	7871	NM_007159	SLMAP	1.54597
chr8	74790840	74791457	1_NT1_cutoff_0.02_peak_24657	274.5	94	2.69e-51	2.92	0.342466	UP	promoter-TSS (NM_001271015)	NR_073120	-4	55284	NM_018299	UBE2W	1.54597
chr9	2014905	2015082	3_NTT1_cutoff_0.02_peak_18664	38	13	4.08e-08	2.92	0.342466	UP	promoter-TSS (NM_001289397)	NM_139045	-225	6595	NM_003070	SMARCA2	1.54597
chr16	3166449	3166681	3_NTT1_cutoff_0.02_peak_7203	23.3	8	1.14e-05	2.91	0.343643	UP	promoter-TSS (NR_024166)	NR_024166	-966	81854	NR_024166	ZNF205-AS1	1.54102
chr17	38375319	38375603	3_NTT1_cutoff_0.02_peak_8562	93.2	32	1.58e-18	2.91	0.343643	UP	promoter-TSS (NM_133264)	NM_133264	-113	147179	NM_133264	WIPF2	1.54102
chr19	5621932	5622100	3_NTT1_cutoff_0.02_peak_9828	23.3	8	1.14e-05	2.91	0.343643	UP	intron (NM_014649, intron 1 of 20)	NM_014649	922	9667	NM_014649	SAFB2	1.54102
chr19	39902778	39902974	3_NTT1_cutoff_0.02_peak_10455	78.5	27	1.11e-15	2.91	0.343643	UP	promoter-TSS (NM_022835)	NM_022835	-874	64857	NM_022835	PLEKHG2	1.54102
chr7	123172764	123173194	1_NT1_cutoff_0.02_peak_23987	78.5	27	1.11e-15	2.91	0.343643	UP	promoter-TSS (NM_001282855)	NM_001321293	23	154865	NM_178827	IQUB	1.54102
chr13	52586510	52586723	1_NT1_cutoff_0.02_peak_7373	104.4	36	2.45e-20	2.9	0.344828	UP	promoter-TSS (NM_001330578)	NM_001004127	94	440138	NM_001004127	ALG11	1.53605
chr8	27183018	27183210	1_NT1_cutoff_0.02_peak_24438	72.5	25	1.54e-14	2.9	0.344828	UP	promoter-TSS (NM_173175)	NM_173175	33	2185	NM_004103	PTK2B	1.53605
chr1	154580350	154580773	1_NT1_cutoff_0.02_peak_1875	147.6	51	6.44e-28	2.89	0.346021	UP	5' UTR (NM_015840, exon 1 of 15)	NM_001111	162	103	NM_001111	ADAR	1.53107
chr1	160254633	160255049	1_NT1_cutoff_0.02_peak_2142	225.3	78	8.5e-42	2.89	0.346021	UP	promoter-TSS (NM_002857)	NR_036493	100	5824	NM_002857	PEX19	1.53107
chr10	27149689	27150041	3_NTT1_cutoff_0.02_peak_2599	92.4	32	4.61e-18	2.89	0.346021	UP	non-coding (NR_145410, exon 1 of 12)	NM_001348030	151	10006	NM_005470	ABI1	1.53107
chr12	120972054	120972587	1_NT1_cutoff_0.02_peak_6960	214	74	5.33e-40	2.89	0.346021	UP	5' UTR (NM_001330474, exon 1 of 17)	NM_001330474	188	9921	NM_014868	RNF10	1.53107
chr16	53737976	53738275	3_NTT1_cutoff_0.02_peak_7597	66.5	23	2.14e-13	2.89	0.346021	UP	promoter-TSS (NM_001328423)	NM_001080432	251	79068	NM_001080432	FTO	1.53107
chr19	58125580	58125758	1_NT1_cutoff_0.02_peak_14510	83.7	29	2.35e-16	2.89	0.346021	UP	promoter-TSS (NM_003435)	NM_003435	82	7693	NM_003435	ZNF134	1.53107
chr4	100815306	100815905	1_NT1_cutoff_0.02_peak_19987	182.1	63	3.03e-34	2.89	0.346021	UP	promoter-TSS (NM_021970)	NR_024170	97	8649	NM_021970	LAMTOR3	1.53107
chr16	67063737	67063929	1_NT1_cutoff_0.02_peak_10013	51.8	18	1.56e-10	2.88	0.347222	UP	intron (NM_001755, intron 2 of 5)	NM_001755	783	865	NM_001755	CBFB	1.52607
chr17	4046111	4046683	1_NT1_cutoff_0.02_peak_10513	302.1	105	3.45e-55	2.88	0.347222	UP	promoter-TSS (NM_144611)	NM_001254756	-65	124936	NM_144611	CYB5D2	1.52607
chr22	19420685	19420853	3_NTT1_cutoff_0.02_peak_12996	25.9	9	8.65e-06	2.88	0.347222	UP	5' UTR (NM_001318152, exon 1 of 3)	NM_001318152	307	64976	NM_003776	MRPL40	1.52607
chr22	41601213	41601548	1_NT1_cutoff_0.02_peak_17839	120.8	42	8.1e-23	2.88	0.347222	UP	promoter-TSS (NM_031488)	NM_031488	68	83746	NM_031488	L3MBTL2	1.52607
chrX	102023991	102024212	3_NTT1_cutoff_0.02_peak_19693	34.5	12	1.55e-07	2.88	0.347222	UP	promoter-TSS (NR_146589)	NR_146591	21	100287765	NR_038988	LINC00630	1.52607
chr1	25664669	25665021	1_NT1_cutoff_0.02_peak_468	71.6	25	4.47e-14	2.87	0.348432	UP	promoter-TSS (NR_135787)	NM_014313	56	23585	NM_014313	TMEM50A	1.52105
chr1	46598046	46598428	1_NT1_cutoff_0.02_peak_1045	365.1	127	3.3e-66	2.87	0.348432	UP	promoter-TSS (NR_125987)	NM_003629	143	8503	NM_003629	PIK3R3	1.52105
chr10	75545052	75545539	1_NT1_cutoff_0.02_peak_3580	160.5	56	7.96e-30	2.87	0.348432	UP	promoter-TSS (NM_001242487)	NM_001242487	-86	23053	NM_015037	ZSWIM8	1.52105
chr10	104153823	104154216	1_NT1_cutoff_0.02_peak_3862	80.3	28	8.72e-16	2.87	0.348432	UP	promoter-TSS (NM_001077494)	NM_001322935	153	4791	NM_002502	NFKB2	1.52105
chr12	133707118	133707300	3_NTT1_cutoff_0.02_peak_5192	88.9	31	4.93e-17	2.87	0.348432	UP	promoter-TSS (NM_001277291)	NM_015394	-5	7556	NM_015394	ZNF10	1.52105
chr19	12848304	12848509	1_NT1_cutoff_0.02_peak_13331	106.2	37	1.92e-20	2.87	0.348432	UP	exon (NM_004317, exon 1 of 7)	NM_004317	134	439	NM_004317	ASNA1	1.52105
chr6	43445117	43445538	1_NT1_cutoff_0.02_peak_22081	212.3	74	4.46e-39	2.87	0.348432	UP	promoter-TSS (NM_001350562)	NM_001350563	67	93643	NM_080604	TJAP1	1.52105
chr10	104005175	104005519	1_NT1_cutoff_0.02_peak_3861	117.4	41	2.99e-22	2.86	0.34965	UP	promoter-TSS (NM_004193)	NM_001199379	92	8729	NM_004193	GBF1	1.51602
chr12	56367715	56368296	1_NT1_cutoff_0.02_peak_6247	208.9	73	4.69e-38	2.86	0.34965	UP	intron (NM_002868, intron 1 of 5)	NM_001252037	211	5869	NM_002868	RAB5B	1.51602
chr17	62833105	62833590	1_NT1_cutoff_0.02_peak_11805	189	66	5.1e-35	2.86	0.34965	UP	promoter-TSS (NR_024386)	NR_024386	-46	440456	NR_024386	PLEKHM1P1	1.51602
chr6	4021218	4021888	1_NT1_cutoff_0.02_peak_21588	322.8	113	7.29e-58	2.86	0.34965	UP	promoter-TSS (NM_003913)	NM_003913	-16	8899	NM_003913	PRPF4B	1.51602
chr6	42951934	42952167	3_NTT1_cutoff_0.02_peak_16476	54.4	19	4.17e-11	2.86	0.34965	UP	promoter-TSS (NM_180976)	NM_006245	-186	5528	NM_006245	PPP2R5D	1.51602
chr9	74525879	74526234	1_NT1_cutoff_0.02_peak_25638	189	66	5.1e-35	2.86	0.34965	UP	promoter-TSS (NM_182505)	NM_016014	104	51104	NM_016014	ABHD17B	1.51602
chr17	5389240	5389594	1_NT1_cutoff_0.02_peak_10590	122.6	43	6.31e-23	2.85	0.350877	UP	promoter-TSS (NM_001258220)	NM_001304777	133	51009	NM_016041	DERL2	1.51096
chr2	180871627	180872235	3_NTT1_cutoff_0.02_peak_11856	131.2	46	1.26e-24	2.85	0.350877	UP	promoter-TSS (NM_020943)	NM_020943	-151	57703	NM_020943	CWC22	1.51096
chr20	20032954	20033301	3_NTT1_cutoff_0.02_peak_12371	65.6	23	6.19e-13	2.85	0.350877	UP	promoter-TSS (NM_001278628)	NM_001278628	8	51340	NM_016652	CRNKL1	1.51096
chr9	132565288	132565633	1_NT1_cutoff_0.02_peak_26139	94.1	33	3.6e-18	2.85	0.350877	UP	promoter-TSS (NM_001317893)	NM_001317893	39	27348	NM_014506	TOR1B	1.51096
chr1	9352855	9353091	1_NT1_cutoff_0.02_peak_217	68.2	24	1.66e-13	2.84	0.352113	UP	promoter-TSS (NM_025106)	NM_025106	32	80176	NM_025106	SPSB1	1.50589
chr10	28966311	28966631	3_NTT1_cutoff_0.02_peak_2632	193.3	68	3.11e-35	2.84	0.352113	UP	promoter-TSS (NM_012342)	NM_012342	47	25805	NM_012342	BAMBI	1.50589
chr17	26988697	26989475	1_NT1_cutoff_0.02_peak_10916	318.5	112	7.61e-57	2.84	0.352113	UP	promoter-TSS (NM_003170)	NM_006923	104	6388	NM_006923	SDF2	1.50589
chr2	39102870	39103266	3_NTT1_cutoff_0.02_peak_11190	88	31	4.93e-17	2.84	0.352113	UP	promoter-TSS (NM_198963)	NM_001329963	7	90957	NM_198963	DHX57	1.50589
chr22	31503392	31503639	1_NT1_cutoff_0.02_peak_17595	59.6	21	8.59e-12	2.84	0.352113	UP	promoter-TSS (NM_080430)	NM_080430	57	140606	NM_080430	SELENOM	1.50589
chr3	53925715	53926420	1_NT1_cutoff_0.02_peak_18577	195.9	69	2.42e-35	2.84	0.352113	UP	promoter-TSS (NM_021237)	NM_021237	-26	58515	NM_021237	SELENOK	1.50589
chr7	135661925	135662472	1_NT1_cutoff_0.02_peak_24113	184.7	65	1.54e-33	2.84	0.352113	UP	promoter-TSS (NM_145808)	NM_001128619	5	767558	NM_001128619	LUZP6	1.50589
chr7	138144851	138145019	3_NTT1_cutoff_0.02_peak_17848	39.7	14	3.12e-08	2.84	0.352113	UP	promoter-TSS (NM_003852)	NM_015905	-144	8805	NM_003852	TRIM24	1.50589
chr8	37553207	37553459	1_NT1_cutoff_0.02_peak_24493	59.6	21	8.59e-12	2.84	0.352113	UP	promoter-TSS (NM_025069)	NM_025069	64	80139	NM_025069	ZNF703	1.50589
chr10	51371154	51371634	1_NT1_cutoff_0.02_peak_3403	289.1	102	1.14e-51	2.83	0.353357	UP	promoter-TSS (NM_001303489)	NR_110767	15	100652748	NM_001290117	TIMM23B	1.5008
chr10	120514329	120514594	1_NT1_cutoff_0.02_peak_3986	101.8	36	5.83e-19	2.83	0.353357	UP	5' UTR (NM_153810, exon 1 of 9)	NM_153810	296	143384	NM_153810	CACUL1	1.5008
chr17	35969230	35969854	1_NT1_cutoff_0.02_peak_11138	289.1	102	1.14e-51	2.83	0.353357	UP	promoter-TSS (NM_001163545)	NM_001163546	-56	11276	NM_007247	SYNRG	1.5008
chr20	48599361	48599720	3_NTT1_cutoff_0.02_peak_12676	265	94	1.03e-46	2.82	0.35461	UP	promoter-TSS (NM_005985)	NM_005985	28	6615	NM_005985	SNAI1	1.4957
chr22	30279083	30279327	1_NT1_cutoff_0.02_peak_17541	73.4	26	3.45e-14	2.82	0.35461	UP	promoter-TSS (NM_021090)	NM_153050	47	8897	NM_021090	MTMR3	1.4957
chrX	56755683	56755880	1_NT1_cutoff_0.02_peak_26639	31.1	11	5.9e-07	2.82	0.35461	UP	5' UTR (NM_001348129, exon 1 of 3)	NM_001348129	130	550643	NM_001348129	NBDY	1.4957
chrX	154444560	154444884	3_NTT1_cutoff_0.02_peak_19842	84.6	30	5.21e-16	2.82	0.35461	UP	promoter-TSS (NM_003372)	NM_003372	21	7411	NM_003372	VBP1	1.4957
chr12	123259017	123259382	3_NTT1_cutoff_0.02_peak_5094	67.3	24	4.75e-13	2.81	0.355872	UP	non-coding (NR_027918, exon 1 of 13)	NR_027918	144	84660	NM_032573	CCDC62	1.49057
chr3	128444805	128445574	1_NT1_cutoff_0.02_peak_18867	233	83	2.01e-41	2.81	0.355872	UP	5' UTR (NM_004637, exon 1 of 6)	NM_004637	211	7879	NM_004637	RAB7A	1.49057
chr4	57774709	57775223	3_NTT1_cutoff_0.02_peak_14780	87.2	31	1.41e-16	2.81	0.355872	UP	promoter-TSS (NM_001193508)	NM_001193508	-113	5978	NM_005612	REST	1.49057
chr1	109756271	109757166	1_NT1_cutoff_0.02_peak_1463	315.9	113	1.05e-54	2.8	0.357143	UP	exon (NM_006513, exon 1 of 11)	NM_001330669	204	6301	NM_006513	SARS	1.48543
chr10	97453459	97453789	1_NT1_cutoff_0.02_peak_3706	128.6	46	2.88e-23	2.8	0.357143	UP	exon (NM_015631, exon 1 of 14)	NM_015631	276	26123	NM_015631	TCTN3	1.48543
chr16	420428	420707	1_NT1_cutoff_0.02_peak_9268	103.6	37	4.47e-19	2.8	0.357143	UP	promoter-TSS (NM_006428)	NM_006428	1	10573	NM_006428	MRPL28	1.48543
chr16	83841464	83841828	1_NT1_cutoff_0.02_peak_10262	103.6	37	4.47e-19	2.8	0.357143	UP	5' UTR (NM_001537, exon 1 of 4)	NM_001537	138	3281	NM_001537	HSBP1	1.48543
chr2	176032078	176033044	1_NT1_cutoff_0.02_peak_15692	240.8	86	3.25e-42	2.8	0.357143	UP	promoter-TSS (NR_030630)	NR_030630	-124	100126350	NR_030630	MIR933	1.48543
chr2	198380396	198381034	1_NT1_cutoff_0.02_peak_15846	335.7	120	3.46e-58	2.8	0.357143	UP	promoter-TSS (NM_001204094)	NM_001100819	-52	25843	NM_015387	MOB4	1.48543
chr3	179322157	179322873	1_NT1_cutoff_0.02_peak_19250	246	88	6.83e-43	2.8	0.357143	UP	promoter-TSS (NM_002492)	NM_001199957	-60	4711	NM_002492	NDUFB5	1.48543
chr3	194392723	194393037	1_NT1_cutoff_0.02_peak_19423	128.6	46	2.88e-23	2.8	0.357143	UP	exon (NM_018385, exon 1 of 14)	NM_018385	326	55341	NM_018385	LSG1	1.48543
chr9	130860635	130861020	1_NT1_cutoff_0.02_peak_26039	254.6	91	1.41e-44	2.8	0.357143	UP	promoter-TSS (NM_052901)	NM_052901	67	114789	NM_052901	SLC25A25	1.48543
chr13	46038895	46039453	3_NTT1_cutoff_0.02_peak_5360	206.3	74	2.33e-36	2.79	0.358423	UP	exon (NM_031431, exon 1 of 23)	NM_031431	144	83548	NM_031431	COG3	1.48027
chr15	44580809	44581302	1_NT1_cutoff_0.02_peak_8652	83.7	30	1.47e-15	2.79	0.358423	UP	5' UTR (NM_138423, exon 1 of 10)	NM_138423	147	113201	NM_138423	CASC4	1.48027
chr17	57970398	57970671	1_NT1_cutoff_0.02_peak_11731	170	61	2.21e-30	2.79	0.358423	UP	promoter-TSS (NM_001193611)	NM_001272042	128	6198	NM_003161	RPS6KB1	1.48027
chr3	12705007	12705243	1_NT1_cutoff_0.02_peak_18154	58.7	21	2.43e-11	2.79	0.358423	UP	promoter-TSS (NM_001354690)	NM_001354690	-118	5894	NM_002880	RAF1	1.48027
chr3	197685655	197686054	3_NTT1_cutoff_0.02_peak_14528	47.5	17	1.67e-09	2.79	0.358423	UP	intron (NM_032263, intron 2 of 11)	NM_032263	1035	84223	NM_032263	IQCG	1.48027
chr5	139781305	139781727	1_NT1_cutoff_0.02_peak_21048	251.2	90	5.13e-44	2.79	0.358423	UP	5' UTR (NM_017747, exon 1 of 34)	NM_020690	117	404734	NM_020690	ANKHD1-EIF4EBP3	1.48027
chr6	43597572	43597857	1_NT1_cutoff_0.02_peak_22097	72.5	26	9.75e-14	2.79	0.358423	UP	promoter-TSS (NM_019096)	NM_001003690	436	9587	NM_014628	MAD2L1BP	1.48027
chr6	142468247	142468574	1_NT1_cutoff_0.02_peak_22521	170	61	2.21e-30	2.79	0.358423	UP	promoter-TSS (NM_001324307)	NM_001286372	112	51534	NM_016485	VTA1	1.48027
chr7	140178977	140179469	3_NTT1_cutoff_0.02_peak_17858	153.6	55	1.9e-27	2.79	0.358423	UP	non-coding (NR_117084, exon 1 of 6)	NM_001145125	146	23608	NM_013446	MKRN1	1.48027
chr11	57479949	57480260	1_NT1_cutoff_0.02_peak_4645	164	59	8.25e-29	2.78	0.359712	UP	promoter-TSS (NM_001317078)	NR_037646	110	100528016	NR_037646	TMX2-CTNND1	1.47508
chr7	134331120	134331889	3_NTT1_cutoff_0.02_peak_17837	386.7	139	3.57e-66	2.78	0.359712	UP	promoter-TSS (NM_199186)	NM_001724	-26	669	NM_001724	BPGM	1.47508
chr1	235491242	235491607	1_NT1_cutoff_0.02_peak_2909	246.8	89	1.46e-42	2.77	0.361011	UP	promoter-TSS (NR_036605)	NM_016374	107	51742	NM_016374	ARID4B	1.46989
chr17	66508440	66509119	1_NT1_cutoff_0.02_peak_11849	271.9	98	9.96e-47	2.77	0.361011	UP	intron (NM_212472, intron 1 of 10)	NM_212472	260	5573	NM_002734	PRKAR1A	1.46989
chr3	167453329	167453770	3_NTT1_cutoff_0.02_peak_14324	135.5	49	4.56e-24	2.77	0.361011	UP	promoter-TSS (NM_005025)	NM_005025	39	5274	NM_005025	SERPINI1	1.46989
chr5	114961531	114961839	1_NT1_cutoff_0.02_peak_20791	132.9	48	1.67e-23	2.77	0.361011	UP	5' UTR (NM_181836, exon 1 of 3)	NM_001164469	191	100302736	NM_001164468	TMED7-TICAM2	1.46989
chr7	102105246	102105661	1_NT1_cutoff_0.02_peak_23841	135.5	49	4.56e-24	2.77	0.361011	UP	promoter-TSS (NM_017621)	NM_001317721	124	222229	NM_152892	LRWD1	1.46989
chr8	144952402	144952780	1_NT1_cutoff_0.02_peak_25166	388.4	140	2.73e-66	2.77	0.361011	UP	promoter-TSS (NM_031308)	NM_031308	41	83481	NM_031308	EPPK1	1.46989
chr9	132805289	132805572	1_NT1_cutoff_0.02_peak_26148	66.5	24	1.34e-12	2.77	0.361011	UP	promoter-TSS (NM_015033)	NM_015033	42	23048	NM_015033	FNBP1	1.46989
chr1	179923486	179924093	1_NT1_cutoff_0.02_peak_2308	221	80	5.92e-38	2.76	0.362319	UP	promoter-TSS (NM_014810)	NM_014810	-118	9857	NM_014810	CEP350	1.46467
chr2	135676308	135676630	1_NT1_cutoff_0.02_peak_15518	163.1	59	8.25e-29	2.76	0.362319	UP	promoter-TSS (NR_135468)	NM_001241	77	905	NM_001241	CCNT2	1.46467
chrX	54466720	54466920	3_NTT1_cutoff_0.02_peak_19594	55.2	20	9.05e-11	2.76	0.362319	UP	promoter-TSS (NM_058163)	NM_058163	12	90121	NM_058163	TSR2	1.46467
chr1	45956652	45956879	3_NTT1_cutoff_0.02_peak_741	44	16	6.25e-09	2.75	0.363636	UP	promoter-TSS (NM_007170)	NM_001320800	74	10420	NM_007170	TESK2	1.45943
chr17	28804224	28804649	1_NT1_cutoff_0.02_peak_11004	203.7	74	4.99e-35	2.75	0.363636	UP	promoter-TSS (NM_004871)	NM_001007025	11	9527	NM_004871	GOSR1	1.45943
chr19	44506875	44507096	3_NTT1_cutoff_0.02_peak_10559	60.4	22	1.83e-11	2.75	0.363636	UP	promoter-TSS (NM_006300)	NR_110727	36	101928063	NR_110727	LOC101928063	1.45943
chr2	44395915	44396207	1_NT1_cutoff_0.02_peak_14944	132.1	48	1.67e-23	2.75	0.363636	UP	5' UTR (NM_002706, exon 1 of 6)	NM_002706	119	5495	NM_002706	PPM1B	1.45943
chr3	121468337	121469081	1_NT1_cutoff_0.02_peak_18804	197.6	72	6.62e-34	2.75	0.363636	UP	promoter-TSS (NM_001256486)	NM_001256487	-95	2804	NM_004487	GOLGB1	1.45943
chr5	36876506	36877230	1_NT1_cutoff_0.02_peak_20444	346.1	126	1.9e-58	2.75	0.363636	UP	promoter-TSS (NM_015384)	NM_133433	7	25836	NM_015384	NIPBL	1.45943
chrX	148622436	148622648	3_NTT1_cutoff_0.02_peak_19773	44	16	6.25e-09	2.75	0.363636	UP	promoter-TSS (NM_001324280)	NM_001171908	23	91966	NM_178124	CXorf40A	1.45943
chr1	120254477	120254662	1_NT1_cutoff_0.02_peak_1560	46.6	17	4.67e-09	2.74	0.364964	UP	5' UTR (NM_006623, exon 1 of 12)	NM_006623	151	26227	NM_006623	PHGDH	1.45418
chr12	7014024	7014178	1_NT1_cutoff_0.02_peak_5695	46.6	17	4.67e-09	2.74	0.364964	UP	5' UTR (NM_001135217, exon 1 of 8)	NM_001135217	204	10233	NM_006992	LRRC23	1.45418
chr12	111051860	111052120	3_NTT1_cutoff_0.02_peak_4932	109.6	40	1.94e-19	2.74	0.364964	UP	exon (NM_001082538, exon 1 of 15)	NM_001319682	158	79600	NM_024549	TCTN1	1.45418
chr14	103523666	103524020	3_NTT1_cutoff_0.02_peak_6292	107	39	2.58e-19	2.74	0.364964	UP	promoter-TSS (NM_006035)	NM_006035	-101	9578	NM_006035	CDC42BPB	1.45418
chr22	29784329	29784663	1_NT1_cutoff_0.02_peak_17534	175.2	64	2.7e-30	2.74	0.364964	UP	promoter-TSS (NM_001127)	NM_001127	76	162	NM_001127	AP1B1	1.45418
chr5	150137794	150139006	1_NT1_cutoff_0.02_peak_21187	612.8	224	5.9e-101	2.74	0.364964	UP	promoter-TSS (NM_001135644)	NM_016221	257	51164	NM_016221	DCTN4	1.45418
chr11	66278044	66278325	1_NT1_cutoff_0.02_peak_4983	120	44	8.18e-21	2.73	0.3663	UP	promoter-TSS (NM_024649)	NM_024649	66	582	NM_024649	BBS1	1.4489
chr2	176033182	176033461	1_NT1_cutoff_0.02_peak_15693	65.6	24	3.7e-12	2.73	0.3663	UP	promoter-TSS (NR_045768)	NM_001256093	-388	1386	NM_001880	ATF2	1.4489
chr5	86708518	86708951	1_NT1_cutoff_0.02_peak_20718	131.2	48	4.61e-23	2.73	0.3663	UP	promoter-TSS (NM_001199189)	NM_001199189	-14	902	NM_001239	CCNH	1.4489
chr6	32095859	32096227	3_NTT1_cutoff_0.02_peak_16353	32.8	12	1.24e-06	2.73	0.3663	UP	promoter-TSS (NM_001136153).2	NM_004381	-26	1388	NM_004381	ATF6B	1.4489
chr7	16685559	16686210	3_NTT1_cutoff_0.02_peak_17150	368.5	135	2.73e-61	2.73	0.3663	UP	promoter-TSS (NM_020319)	NR_027624	126	28969	NM_014038	BZW2	1.4489
chr8	37707203	37707613	1_NT1_cutoff_0.02_peak_24499	133.8	49	3.47e-23	2.73	0.3663	UP	promoter-TSS (NM_018310)	NM_018310	23	55290	NM_018310	BRF2	1.4489
chr8	100025033	100025764	1_NT1_cutoff_0.02_peak_24739	242.5	89	8.37e-41	2.73	0.3663	UP	promoter-TSS (NM_017890)	NM_181661	-95	157680	NM_015243	VPS13B	1.4489
chr1	32666317	32666510	3_NTT1_cutoff_0.02_peak_489	35.4	13	3.3e-07	2.72	0.367647	UP	intron (NM_024296, intron 1 of 5)	NM_001301011	427	79140	NM_024296	CCDC28B	1.44361
chr1	70876573	70877005	1_NT1_cutoff_0.02_peak_1247	139	51	7.13e-24	2.72	0.367647	UP	promoter-TSS (NM_001902)	NM_001190463	-112	1491	NM_001902	CTH	1.44361
chr1	85725156	85725468	1_NT1_cutoff_0.02_peak_1302	139	51	7.13e-24	2.72	0.367647	UP	promoter-TSS (NR_024113)	NR_024113	43	148423	NM_198077	C1orf52	1.44361
chr2	47382090	47382999	3_NTT1_cutoff_0.02_peak_11241	89.8	33	6.24e-16	2.72	0.367647	UP	promoter-TSS (NM_173649)	NM_001163561	-28	285051	NM_173649	STPG4	1.44361
chr2	135809697	135810165	1_NT1_cutoff_0.02_peak_15520	163.1	60	4.74e-28	2.72	0.367647	UP	promoter-TSS (NM_001172435)	NM_001172435	96	22930	NM_012233	RAB3GAP1	1.44361
chr20	19997885	19998176	1_NT1_cutoff_0.02_peak_16434	106.2	39	7.11e-19	2.72	0.367647	UP	promoter-TSS (NM_181528)	NM_016100	97	51126	NM_016100	NAA20	1.44361
chr5	143550022	143550568	1_NT1_cutoff_0.02_peak_21106	266.7	98	1.57e-44	2.72	0.367647	UP	promoter-TSS (NM_030799)	NM_030799	-17	81555	NM_030799	YIPF5	1.44361
chr7	5821086	5821423	3_NTT1_cutoff_0.02_peak_17107	108.7	40	5.32e-19	2.72	0.367647	UP	5' UTR (NM_207111, exon 1 of 17)	NM_207116	106	54476	NM_019011	RNF216	1.44361
chr1	23036913	23037081	3_NTT1_cutoff_0.02_peak_249	19	7	0.000362	2.71	0.369004	UP	promoter-TSS (NM_001309193)	NM_004442	-334	2048	NM_004442	EPHB2	1.43829
chr1	110576905	110577446	3_NTT1_cutoff_0.02_peak_1176	159.7	59	4.7e-27	2.71	0.369004	UP	promoter-TSS (NM_033088)	NM_033088	-47	85369	NM_033088	STRIP1	1.43829
chr16	18812379	18813384	1_NT1_cutoff_0.02_peak_9645	536	198	6.93e-87	2.71	0.369004	UP	promoter-TSS (NM_001313858)	NM_015161	118	23204	NM_015161	ARL6IP1	1.43829
chr19	6376023	6376211	3_NTT1_cutoff_0.02_peak_9876	38	14	2.42e-07	2.71	0.369004	UP	promoter-TSS (NM_004158)	NM_004158	-190	5623	NM_004158	PSPN	1.43829
chr7	100171150	100171318	3_NTT1_cutoff_0.02_peak_17647	19	7	0.000362	2.71	0.369004	UP	TTS (NM_001289933)	NM_001348680	209	100316904	NM_001168682	SAP25	1.43829
chr9	34989260	34989428	3_NTT1_cutoff_0.02_peak_18773	19	7	0.000362	2.71	0.369004	UP	promoter-TSS (NM_001349725)	NR_109756	32	101926900	NR_109756	DNAJB5-DT	1.43829
chr12	53689145	53689524	1_NT1_cutoff_0.02_peak_6133	164.9	61	9.66e-28	2.7	0.37037	UP	promoter-TSS (NM_002624)	NM_145897	100	5204	NM_002624	PFDN5	1.43296
chr17	40950529	40950821	1_NT1_cutoff_0.02_peak_11345	83.7	31	8.36e-15	2.7	0.37037	UP	promoter-TSS (NM_001330222)	NM_001040431	68	28958	NM_001040431	COA3	1.43296
chr2	207630150	207630531	3_NTT1_cutoff_0.02_peak_12045	170	63	7.33e-29	2.7	0.37037	UP	promoter-TSS (NR_104261)	NM_001330224	-68	130752	NM_206892	MDH1B	1.43296
chr3	139108111	139109052	1_NT1_cutoff_0.02_peak_18994	370.3	137	1.15e-60	2.7	0.37037	UP	promoter-TSS (NR_023350)	NR_023350	-60	9276	NM_004766	COPB2	1.43296
chr4	113558582	113558851	1_NT1_cutoff_0.02_peak_20044	105.3	39	1.94e-18	2.7	0.37037	UP	promoter-TSS (NM_001350397)	NM_015454	105	51574	NM_015454	LARP7	1.43296
chr1	1341773	1342146	1_NT1_cutoff_0.02_peak_88	91.5	34	4.64e-16	2.69	0.371747	UP	intron (NM_017971, intron 2 of 3)	NM_001318485	733	55052	NM_017971	MRPL20	1.42761
chr17	4699374	4699663	1_NT1_cutoff_0.02_peak_10547	118.2	44	2.22e-20	2.69	0.371747	UP	promoter-TSS (NM_001270481)	NM_002798	80	5694	NM_002798	PSMB6	1.42761
chr19	15442081	15443471	1_NT1_cutoff_0.02_peak_13452	658.5	245	2.73e-105	2.69	0.371747	UP	intron (NM_001330384, intron 1 of 11)	NM_001330384	578	23476	NM_014299	BRD4	1.42761
chr7	135194661	135194958	1_NT1_cutoff_0.02_peak_24110	120.8	45	1.65e-20	2.69	0.371747	UP	promoter-TSS (NM_001190850)	NM_013316	65	4850	NM_013316	CNOT4	1.42761
chr7	152132966	152133157	1_NT1_cutoff_0.02_peak_24236	48.3	18	3.45e-09	2.69	0.371747	UP	promoter-TSS (NR_002935)	NM_170606	28	58508	NM_021230	KMT2C	1.42761
chr1	59165360	59165852	1_NT1_cutoff_0.02_peak_1147	227.9	85	2.85e-37	2.68	0.373134	UP	intron (NM_001085487, intron 1 of 19)	NM_001085487	141	114803	NM_001085487	MYSM1	1.42223
chr1	164528303	164528599	1_NT1_cutoff_0.02_peak_2197	80.3	30	3.06e-14	2.68	0.373134	UP	promoter-TSS (NM_002585)	NM_001204961	-146	5087	NM_002585	PBX1	1.42223
chr12	107167690	107168015	1_NT1_cutoff_0.02_peak_6798	152.8	57	1.67e-25	2.68	0.373134	UP	promoter-TSS (NM_001351367)	NR_147132	-481	55188	NM_018157	RIC8B	1.42223
chr12	133562824	133563201	3_NTT1_cutoff_0.02_peak_5191	99.3	37	2.58e-17	2.68	0.373134	UP	promoter-TSS (NM_001256280)	NM_019591	79	7574	NM_019591	ZNF26	1.42223
chr16	28888795	28888987	3_NTT1_cutoff_0.02_peak_7448	26.8	10	1.77e-05	2.68	0.373134	UP	promoter-TSS (NM_004320)	NM_004320	-918	487	NM_004320	ATP2A1	1.42223
chr17	58603364	58603890	1_NT1_cutoff_0.02_peak_11739	238.2	89	4.5e-39	2.68	0.373134	UP	promoter-TSS (NM_001282476)	NM_006380	-26	10513	NM_006380	APPBP2	1.42223
chr19	16222471	16222902	3_NTT1_cutoff_0.02_peak_10144	152.8	57	1.67e-25	2.68	0.373134	UP	5' UTR (NM_005370, exon 1 of 8)	NM_005370	197	4218	NM_005370	RAB8A	1.42223
chr21	30364415	30364721	3_NTT1_cutoff_0.02_peak_12832	26.8	10	1.77e-05	2.68	0.373134	UP	intron (NM_001320766, intron 1 of 28)	NM_015565	709	26046	NM_015565	LTN1	1.42223
chr5	133512288	133513679	1_NT1_cutoff_0.02_peak_20899	1018.5	380	5.15e-161	2.68	0.373134	UP	promoter-TSS (NM_170679)	NM_006930	-260	6500	NM_006930	SKP1	1.42223
chr12	6960300	6960541	1_NT1_cutoff_0.02_peak_5688	29.3	11	4.68e-06	2.67	0.374532	UP	promoter-TSS (NM_001098536)	NM_001297604	673	83461	NM_031299	CDCA3	1.41684
chr12	56582928	56583662	3_NTT1_cutoff_0.02_peak_4613	251.2	94	5.3e-41	2.67	0.374532	UP	promoter-TSS (NM_001130420)	NM_001330288	63	6601	NM_003075	SMARCC2	1.41684
chr15	34610777	34611071	3_NTT1_cutoff_0.02_peak_6391	29.3	11	4.68e-06	2.67	0.374532	UP	promoter-TSS (NM_005135)	NM_005135	97	9990	NM_005135	SLC12A6	1.41684
chr20	43150507	43150827	1_NT1_cutoff_0.02_peak_16753	112.2	42	2.94e-19	2.67	0.374532	UP	promoter-TSS (NM_006811)	NM_006811	90	10955	NM_006811	SERINC3	1.41684
chr3	43732091	43732654	3_NTT1_cutoff_0.02_peak_13659	269.3	101	1.29e-43	2.67	0.374532	UP	promoter-TSS (NM_001355186)	NM_016006	11	51099	NM_016006	ABHD5	1.41684
chr3	48754244	48754906	1_NT1_cutoff_0.02_peak_18385	258.9	97	8.11e-42	2.67	0.374532	UP	intron (NM_001190316, intron 1 of 2)	NR_027437	136	51447	NM_016291	IP6K2	1.41684
chr7	5085292	5085751	3_NTT1_cutoff_0.02_peak_17081	227	85	7.63e-37	2.67	0.374532	UP	promoter-TSS (NM_001204456)	NM_021163	-31	57786	NM_021163	RBAK	1.41684
chr1	70671092	70671615	1_NT1_cutoff_0.02_peak_1242	186.4	70	1.28e-30	2.66	0.37594	UP	promoter-TSS (NM_001350608)	NM_017768	7	55631	NM_017768	LRRC40	1.41143
chr10	99051832	99052485	3_NTT1_cutoff_0.02_peak_2957	69	26	2.03e-12	2.66	0.37594	UP	intron (NM_001204300, intron 1 of 10)	NM_032900	271	84986	NM_032900	ARHGAP19	1.41143
chr14	23540594	23540999	1_NT1_cutoff_0.02_peak_7761	167.4	63	1.43e-27	2.66	0.37594	UP	promoter-TSS (NM_001164817)	NM_001164816	-18	22985	NM_014977	ACIN1	1.41143
chr17	47784924	47785473	1_NT1_cutoff_0.02_peak_11560	183.8	69	4.6e-30	2.66	0.37594	UP	5' UTR (NM_001278784, exon 1 of 9)	NM_005827	114	10237	NM_005827	SLC35B1	1.41143
chr2	70475533	70476083	1_NT1_cutoff_0.02_peak_15122	263.2	99	1.67e-42	2.66	0.37594	UP	non-coding (NR_147232, exon 1 of 11)	NR_147230	117	7072	NM_022037	TIA1	1.41143
chr2	96931468	96932191	1_NT1_cutoff_0.02_peak_15288	258.1	97	8.11e-42	2.66	0.37594	UP	promoter-TSS (NM_004804)	NM_004804	-54	9391	NM_004804	CIAO1	1.41143
chr2	239229093	239229329	1_NT1_cutoff_0.02_peak_16175	61.3	23	3.72e-11	2.66	0.37594	UP	promoter-TSS (NM_015650)	NM_015650	26	26146	NM_015650	TRAF3IP1	1.41143
chr20	18448002	18448204	1_NT1_cutoff_0.02_peak_16422	63.9	24	2.72e-11	2.66	0.37594	UP	promoter-TSS (NM_001351683)	NM_001282526	70	10621	NM_006466	POLR3F	1.41143
chr5	112196595	112197247	1_NT1_cutoff_0.02_peak_20776	361.6	136	1.55e-57	2.66	0.37594	UP	promoter-TSS (NM_001204193)	NM_001204194	36	6728	NM_003135	SRP19	1.41143
chr6	91296547	91297140	1_NT1_cutoff_0.02_peak_22327	194.2	73	7.25e-32	2.66	0.37594	UP	5' UTR (NM_145332, exon 1 of 16)	NM_145331	176	6885	NM_003188	MAP3K7	1.41143
chr12	100536457	100536732	1_NT1_cutoff_0.02_peak_6745	111.3	42	7.89e-19	2.65	0.377358	UP	promoter-TSS (NM_015054)	NM_001006947	47	23074	NM_015054	UHRF1BP1L	1.40599
chr15	64387839	64388374	1_NT1_cutoff_0.02_peak_8805	153.6	58	3.29e-25	2.65	0.377358	UP	promoter-TSS (NM_148955)	NM_001242933	24	6642	NM_003099	SNX1	1.40599
chr17	41322874	41323027	1_NT1_cutoff_0.02_peak_11366	37.1	14	2.42e-07	2.65	0.377358	UP	promoter-TSS (NR_110868)	NM_005899	-36	4077	NM_005899	NBR1	1.40599
chr9	2015263	2015460	3_NTT1_cutoff_0.02_peak_18665	39.7	15	1.75e-07	2.65	0.377358	UP	5' UTR (NM_001289397, exon 1 of 33)	NM_003070	143	6595	NM_003070	SMARCA2	1.40599
chr11	36310853	36311049	3_NTT1_cutoff_0.02_peak_3433	47.5	18	9.31e-09	2.64	0.378788	UP	promoter-TSS (NM_001101653)	NM_001101653	48	29099	NM_014186	COMMD9	1.40054
chr17	21117100	21118087	3_NTT1_cutoff_0.02_peak_8266	359	136	1.09e-56	2.64	0.378788	UP	non-coding (NR_024547, exon 1 of 3)	NR_024547	314	8834	NM_003876	TMEM11	1.40054
chr2	85788429	85788941	1_NT1_cutoff_0.02_peak_15230	224.4	85	5.4e-36	2.64	0.378788	UP	promoter-TSS (NM_001311312)	NM_000821	-28	2677	NM_000821	GGCX	1.40054
chr2	230787360	230787797	1_NT1_cutoff_0.02_peak_16102	89.8	34	3.33e-15	2.64	0.378788	UP	promoter-TSS (NM_001348317)	NM_001348335	317	9320	NM_004238	TRIP12	1.40054
chr20	44420445	44420804	1_NT1_cutoff_0.02_peak_16778	147.6	56	4.28e-24	2.64	0.378788	UP	promoter-TSS (NM_080614)	NM_052951	49	116092	NM_052951	DNTTIP1	1.40054
chr21	33651188	33651610	1_NT1_cutoff_0.02_peak_17105	89.8	34	3.33e-15	2.64	0.378788	UP	promoter-TSS (NM_018944)	NM_018944	-23	54069	NM_018944	MIS18A	1.40054
chr22	37171997	37172208	1_NT1_cutoff_0.02_peak_17679	44.9	17	3.43e-08	2.64	0.378788	UP	promoter-TSS (NR_033531)	NM_006860	74	11020	NM_006860	IFT27	1.40054
chr3	125238829	125239227	1_NT1_cutoff_0.02_peak_18827	137.2	52	1.03e-22	2.64	0.378788	UP	promoter-TSS (NR_073435)	NM_003794	30	8723	NM_003794	SNX4	1.40054
chr11	16759709	16760714	3_NTT1_cutoff_0.02_peak_3355	566.2	215	8.6e-88	2.63	0.380228	UP	promoter-TSS (NM_014267)	NM_014267	64	10944	NM_014267	C11orf58	1.39506
chr11	117102577	117103566	1_NT1_cutoff_0.02_peak_5378	302.9	115	1.41e-47	2.63	0.380228	UP	promoter-TSS (NM_001278249)	NM_004716	169	9159	NM_004716	PCSK7	1.39506
chr15	59279709	59280078	1_NT1_cutoff_0.02_peak_8748	107.9	41	7.57e-18	2.63	0.380228	UP	promoter-TSS (NM_001270530)	NM_001270529	29	54778	NM_017610	RNF111	1.39506
chr18	54318579	54319019	3_NTT1_cutoff_0.02_peak_9525	60.4	23	9.95e-11	2.63	0.380228	UP	5' UTR (NM_015285, exon 1 of 28)	NM_015285	183	23335	NM_015285	WDR7	1.39506
chr5	148930094	148930471	1_NT1_cutoff_0.02_peak_21166	126	48	6.61e-21	2.63	0.380228	UP	promoter-TSS (NM_001271742)	NM_001271742	-389	1452	NM_001892	CSNK1A1	1.39506
chrX	67718616	67719083	1_NT1_cutoff_0.02_peak_26651	210.6	80	1.22e-33	2.63	0.380228	UP	5' UTR (NM_173834, exon 1 of 7)	NM_001195214	226	286451	NM_173834	YIPF6	1.39506
chrX	153362980	153363185	1_NT1_cutoff_0.02_peak_26931	63	24	2.72e-11	2.63	0.380228	UP	exon (NM_001110792, exon 1 of 3)	NM_001110792	105	4204	NM_004992	MECP2	1.39506
chr1	32801663	32801942	1_NT1_cutoff_0.02_peak_660	73.4	28	1.09e-12	2.62	0.381679	UP	promoter-TSS (NR_052852)	NM_023009	37	65108	NM_023009	MARCKSL1	1.38957
chr13	25861390	25861889	1_NT1_cutoff_0.02_peak_7190	159.7	61	1.3e-25	2.62	0.381679	UP	promoter-TSS (NM_004685)	NM_004685	64	9107	NM_004685	MTMR6	1.38957
chr14	75179600	75180109	1_NT1_cutoff_0.02_peak_8174	259.8	99	8.2e-41	2.62	0.381679	UP	promoter-TSS (NM_001318508)	NM_015962	5	51077	NM_015962	FCF1	1.38957
chr15	64648123	64648762	1_NT1_cutoff_0.02_peak_8812	175.2	67	4.18e-28	2.62	0.381679	UP	promoter-TSS (NM_001329605)	NM_001329607	15	53944	NM_022048	CSNK1G1	1.38957
chr3	194406506	194406803	1_NT1_cutoff_0.02_peak_19425	162.3	62	3.62e-26	2.62	0.381679	UP	promoter-TSS (NM_153690)	NM_153690	33	131583	NM_153690	FAM43A	1.38957
chr7	96338932	96339381	1_NT1_cutoff_0.02_peak_23666	146.7	56	1.13e-23	2.62	0.381679	UP	promoter-TSS (NM_001349701)	NM_006304	46	7979	NM_006304	SEM1	1.38957
chr7	127225457	127225746	1_NT1_cutoff_0.02_peak_23993	83.7	32	4.37e-14	2.62	0.381679	UP	promoter-TSS (NM_024523)	NM_024523	52	79571	NM_024523	GCC1	1.38957
chr9	139377198	139377654	1_NT1_cutoff_0.02_peak_26268	170	65	2.05e-27	2.62	0.381679	UP	promoter-TSS (NM_014866)	NM_014866	81	9919	NM_014866	SEC16A	1.38957
chr12	57913979	57914531	1_NT1_cutoff_0.02_peak_6374	448.8	172	1.24e-68	2.61	0.383142	UP	promoter-TSS (NM_001195053)	NM_004083	45	1649	NM_004083	DDIT3	1.38405
chr13	46626694	46627128	3_NTT1_cutoff_0.02_peak_5361	132.9	51	2.57e-21	2.61	0.383142	UP	promoter-TSS (NM_001076788)	NM_001330567	2	23091	NM_015070	ZC3H13	1.38405
chr14	31889391	31890018	3_NTT1_cutoff_0.02_peak_5785	242.5	93	6.56e-38	2.61	0.383142	UP	promoter-TSS (NR_110045)	NM_015473	83	25938	NM_015473	HEATR5A	1.38405
chr6	170863308	170863643	1_NT1_cutoff_0.02_peak_22676	132.9	51	2.57e-21	2.61	0.383142	UP	promoter-TSS (NM_003194)	NM_003194	55	6908	NM_003194	TBP	1.38405
chr9	74383132	74383626	3_NTT1_cutoff_0.02_peak_18864	308.1	118	5.58e-48	2.61	0.383142	UP	5' UTR (NM_001135820, exon 1 of 23)	NM_001349784	421	23670	NM_013390	CEMIP2	1.38405
chrX	85302376	85302668	1_NT1_cutoff_0.02_peak_26721	88.9	34	8.77e-15	2.61	0.383142	UP	promoter-TSS (NM_001320959)	NM_000390	47	1121	NM_000390	CHM	1.38405
chr16	69796123	69796662	3_NTT1_cutoff_0.02_peak_7725	244.3	94	4.8e-38	2.6	0.384615	UP	intron (NM_001270455, intron 1 of 8)	NM_001270455	206	11060	NM_007014	WWP2	1.37851
chrX	73164065	73164348	1_NT1_cutoff_0.02_peak_26686	145.9	56	2.95e-23	2.6	0.384615	UP	promoter-TSS (NR_024582)	NR_024582	48	554203	NR_024582	JPX	1.37851
chr1	156265348	156265593	3_NTT1_cutoff_0.02_peak_1647	28.5	11	1.26e-05	2.59	0.3861	UP	promoter-TSS (NM_144580)	NM_001256609	9	112770	NM_144580	GLMP	1.37295
chr1	226186739	226187512	1_NT1_cutoff_0.02_peak_2750	597.3	231	1.57e-89	2.59	0.3861	UP	promoter-TSS (NM_152608)	NM_152608	-60	163859	NM_152608	SDE2	1.37295
chr11	72433234	72433432	3_NTT1_cutoff_0.02_peak_3880	44	17	3.43e-08	2.59	0.3861	UP	promoter-TSS (NM_015242)	NM_001135190	70	116985	NM_015242	ARAP1	1.37295
chr14	50319131	50319696	3_NTT1_cutoff_0.02_peak_5902	181.2	70	1.63e-28	2.59	0.3861	UP	TTS (NR_145670)	NM_004713	507	9147	NM_004713	NEMF	1.37295
chr15	41166209	41166573	3_NTT1_cutoff_0.02_peak_6435	95.8	37	1.28e-15	2.59	0.3861	UP	promoter-TSS (NM_133639)	NM_133639	96	171177	NM_133639	RHOV	1.37295
chr15	45003401	45004482	1_NT1_cutoff_0.02_peak_8668	580.9	224	2.48e-87	2.59	0.3861	UP	intron (NM_004048, intron 1 of 3)	NM_004048	257	567	NM_004048	B2M	1.37295
chr16	2034081	2034357	3_NTT1_cutoff_0.02_peak_7117	88	34	8.77e-15	2.59	0.3861	UP	promoter-TSS (NM_005262)	NM_005262	69	2671	NM_005262	GFER	1.37295
chr16	58231891	58232161	3_NTT1_cutoff_0.02_peak_7625	88	34	8.77e-15	2.59	0.3861	UP	promoter-TSS (NM_001896)	NM_001896	-202	1459	NM_001896	CSNK2A2	1.37295
chr17	26898348	26898612	1_NT1_cutoff_0.02_peak_10910	85.4	33	3.17e-14	2.59	0.3861	UP	intron (NM_033198, intron 1 of 11)	NM_033198	407	94005	NM_033198	PIGS	1.37295
chr17	57969836	57970325	1_NT1_cutoff_0.02_peak_11730	103.6	40	7.14e-17	2.59	0.3861	UP	promoter-TSS (NM_001272060)	NM_001193609	225	51174	NM_016261	TUBD1	1.37295
chr18	39535103	39535389	1_NT1_cutoff_0.02_peak_12492	90.6	35	6.35e-15	2.59	0.3861	UP	promoter-TSS (NM_002647)	NM_001308020	83	5289	NM_002647	PIK3C3	1.37295
chr19	52598834	52599096	1_NT1_cutoff_0.02_peak_14366	95.8	37	1.28e-15	2.59	0.3861	UP	promoter-TSS (NM_001352298)	NM_001352298	53	284371	NM_001136499	ZNF841	1.37295
chr2	55843736	55844387	1_NT1_cutoff_0.02_peak_15011	101	39	2.57e-16	2.59	0.3861	UP	intron (NM_001122964, intron 1 of 16)	NM_001282850	798	57223	NM_020463	PPP4R3B	1.37295
chr2	136499226	136500249	1_NT1_cutoff_0.02_peak_15522	251.2	97	7.15e-39	2.59	0.3861	UP	intron (NM_014607, intron 1 of 12)	NM_014607	549	23190	NM_014607	UBXN4	1.37295
chr22	50913303	50913518	1_NT1_cutoff_0.02_peak_18050	62.1	24	7.21e-11	2.59	0.3861	UP	promoter-TSS (NM_002972)	NM_002972	89	6305	NM_002972	SBF1	1.37295
chr3	158362224	158362629	1_NT1_cutoff_0.02_peak_19123	121.7	47	1.64e-19	2.59	0.3861	UP	exon (NM_001308166, exon 1 of 14)	NM_001308164	110	85476	NM_024996	GFM1	1.37295
chr4	83956258	83956504	1_NT1_cutoff_0.02_peak_19941	82.9	32	1.14e-13	2.59	0.3861	UP	exon (NM_016129, exon 1 of 10)	NM_001258006	142	51138	NM_016129	COPS4	1.37295
chr4	155665064	155665277	3_NTT1_cutoff_0.02_peak_15078	46.6	18	2.46e-08	2.59	0.3861	UP	promoter-TSS (NM_004744)	NM_004744	48	9227	NM_004744	LRAT	1.37295
chr5	64064698	64064958	1_NT1_cutoff_0.02_peak_20558	51.8	20	4.83e-09	2.59	0.3861	UP	promoter-TSS (NM_173829)	NM_001318000	83	10283	NM_005869	CWC27	1.37295
chr5	114505421	114505720	1_NT1_cutoff_0.02_peak_20787	69.9	27	1.03e-11	2.59	0.3861	UP	promoter-TSS (NM_001300759)	NM_001300759	89	55521	NM_018700	TRIM36	1.37295
chr6	37786599	37786922	1_NT1_cutoff_0.02_peak_21989	199.4	77	3.85e-31	2.59	0.3861	UP	promoter-TSS (NM_021943)	NM_021943	-546	60685	NM_021943	ZFAND3	1.37295
chr6_ssto_hap7	3491429	3491641	1_NT1_cutoff_0.02_peak_22940	33.7	13	2.4e-06	2.59	0.3861	UP	5' UTR (NM_006411, exon 1 of 7).7	NM_006411	109	10554	NM_006411	AGPAT1	1.37295
chr8	59465624	59466047	1_NT1_cutoff_0.02_peak_24601	287.4	111	4.11e-44	2.59	0.3861	UP	5' UTR (NM_001330537, exon 1 of 10)	NM_005625	108	6386	NM_005625	SDCBP	1.37295
chr9	99775029	99775302	1_NT1_cutoff_0.02_peak_25786	59.6	23	2.62e-10	2.59	0.3861	UP	intron (NM_001355228, intron 1 of 4)	NM_001355228	798	84278	NM_001355228	MFSD14C	1.37295
chrX	48979912	48980221	1_NT1_cutoff_0.02_peak_26586	57	22	9.51e-10	2.59	0.3861	UP	promoter-TSS (NM_015698)	NM_015698	84	27238	NM_015698	GPKOW	1.37295
chr1	43855255	43855982	1_NT1_cutoff_0.02_peak_956	346.1	134	1.18e-52	2.58	0.387597	UP	promoter-TSS (NM_052877)	NM_015284	63	23334	NM_015284	SZT2	1.36737
chr1	109584507	109584854	1_NT1_cutoff_0.02_peak_1458	180.4	70	4.22e-28	2.58	0.387597	UP	5' UTR (NM_001142551, exon 1 of 15)	NM_001142551	169	22911	NM_014969	WDR47	1.36737
chr1	113615642	113616216	3_NTT1_cutoff_0.02_peak_1215	188.2	73	2.41e-29	2.58	0.387597	UP	promoter-TSS (NR_103777)	NM_001312686	137	9860	NM_014813	LRIG2	1.36737
chr1	207223849	207224644	3_NTT1_cutoff_0.02_peak_2097	469.5	182	2.06e-70	2.58	0.387597	UP	exon (NM_018566, exon 1 of 2)	NM_018566	175	55432	NM_018566	YOD1	1.36737
chr11	74659919	74660578	1_NT1_cutoff_0.02_peak_5175	315	122	4.14e-48	2.58	0.387597	UP	promoter-TSS (NM_001270381)	NM_001270381	-17	143570	NM_182969	XRRA1	1.36737
chr2	231921489	231921882	1_NT1_cutoff_0.02_peak_16112	175.2	68	2.08e-27	2.58	0.387597	UP	non-coding (NR_034059, exon 1 of 24)	NM_001191037	108	5707	NM_002807	PSMD1	1.36737
chr3	50126112	50127199	1_NT1_cutoff_0.02_peak_18441	289.1	112	2.99e-44	2.58	0.387597	UP	intron (NM_005778, intron 1 of 24)	NR_036627	315	10181	NM_005778	RBM5	1.36737
chr8	30515272	30515861	1_NT1_cutoff_0.02_peak_24479	159.7	62	6.41e-25	2.58	0.387597	UP	promoter-TSS (NM_001348353)	NM_002095	191	2961	NM_002095	GTF2E2	1.36737
chr1	7831140	7831586	3_NTT1_cutoff_0.02_peak_91	146.7	57	5.56e-23	2.57	0.389105	UP	promoter-TSS (NM_004781)	NM_004781	34	9341	NM_004781	VAMP3	1.36177
chr1	10534843	10535397	1_NT1_cutoff_0.02_peak_231	123.4	48	1.18e-19	2.57	0.389105	UP	intron (NM_004565, intron 1 of 8)	NM_004565	117	5195	NM_004565	PEX14	1.36177
chr1	20208770	20209097	1_NT1_cutoff_0.02_peak_380	105.3	41	5.17e-17	2.57	0.389105	UP	promoter-TSS (NM_015207)	NM_015207	46	23252	NM_015207	OTUD3	1.36177
chr11	63741982	63742632	1_NT1_cutoff_0.02_peak_4796	233.9	91	1.45e-35	2.57	0.389105	UP	intron (NM_004074, intron 1 of 1)	NM_004074	228	1351	NM_004074	COX8A	1.36177
chr15	34393873	34394462	1_NT1_cutoff_0.02_peak_8504	270.1	105	3.23e-41	2.57	0.389105	UP	promoter-TSS (NM_152595)	NM_152595	-106	161779	NM_152595	PGBD4	1.36177
chr15	72767168	72767773	1_NT1_cutoff_0.02_peak_8906	126	49	3.31e-20	2.57	0.389105	UP	promoter-TSS (NR_135678)	NM_005744	804	25820	NM_005744	ARIH1	1.36177
chr19	6393111	6393524	1_NT1_cutoff_0.02_peak_13057	223.5	87	3.5e-34	2.57	0.389105	UP	promoter-TSS (NR_106848)	NM_002096	-27	2962	NM_002096	GTF2F1	1.36177
chr2	105953238	105954309	1_NT1_cutoff_0.02_peak_15340	290	113	1.45e-43	2.57	0.389105	UP	promoter-TSS (NM_024093)	NM_001286537	-42	79074	NM_024093	C2orf49	1.36177
chr5	131826197	131826652	3_NTT1_cutoff_0.02_peak_15492	280.5	109	1.35e-42	2.57	0.389105	UP	promoter-TSS (NM_001354925)	NM_002198	40	3659	NM_002198	IRF1	1.36177
chr5	138677344	138678297	1_NT1_cutoff_0.02_peak_21031	416.9	162	2.7e-62	2.57	0.389105	UP	promoter-TSS (NM_001033112)	NR_109830	300	51247	NM_016480	PAIP2	1.36177
chr14	55369357	55369680	1_NT1_cutoff_0.02_peak_7974	166.6	65	9.4e-26	2.56	0.390625	UP	promoter-TSS (NM_001024071)	NM_001024024	23	2643	NM_000161	GCH1	1.35614
chr16	30773240	30773826	1_NT1_cutoff_0.02_peak_9826	217.5	85	4.42e-33	2.56	0.390625	UP	promoter-TSS (NM_001286572)	NM_001014979	32	90835	NM_001014979	CCDC189	1.35614
chr5	133968314	133968796	1_NT1_cutoff_0.02_peak_20914	291.7	114	1.05e-43	2.56	0.390625	UP	promoter-TSS (NM_016103)	NM_001033503	-22	51128	NM_016103	SAR1B	1.35614
chr5	170845636	170845849	1_NT1_cutoff_0.02_peak_21314	66.5	26	3.73e-11	2.56	0.390625	UP	promoter-TSS (NM_003862)	NM_003862	-924	8817	NM_003862	FGF18	1.35614
chr7	43908879	43909337	3_NTT1_cutoff_0.02_peak_17276	233	91	1.45e-35	2.56	0.390625	UP	promoter-TSS (NM_032014)	NM_032014	37	64951	NM_032014	MRPS24	1.35614
chr11	86748890	86749066	3_NTT1_cutoff_0.02_peak_4014	61.3	24	1.88e-10	2.55	0.392157	UP	promoter-TSS (NR_033149)	NR_033149	92	65084	NM_022918	TMEM135	1.3505
chr14	76617947	76618509	1_NT1_cutoff_0.02_peak_8206	252.9	99	6.44e-38	2.55	0.392157	UP	promoter-TSS (NM_001322028)	NM_017926	0	55668	NM_017926	GPATCH2L	1.3505
chr15	68346320	68346859	1_NT1_cutoff_0.02_peak_8852	165.7	65	2.41e-25	2.55	0.392157	UP	promoter-TSS (NM_016166)	NM_016166	73	8554	NM_016166	PIAS1	1.3505
chr15	89456480	89456656	1_NT1_cutoff_0.02_peak_9078	50.9	20	1.25e-08	2.55	0.392157	UP	promoter-TSS (NM_001310321)	NM_005928	132	4240	NM_005928	MFGE8	1.3505
chr17	70588598	70589102	1_NT1_cutoff_0.02_peak_11854	455.7	179	1.01e-66	2.55	0.392157	UP	promoter-TSS (NR_137281)	NR_137281	93	100499467	NR_036488	LINC00673	1.3505
chr18	21032914	21033440	3_NTT1_cutoff_0.02_peak_9434	203.7	80	9.69e-31	2.55	0.392157	UP	promoter-TSS (NM_001348193)	NR_145477	-8	8780	NM_003831	RIOK3	1.3505
chr19	53030817	53031191	1_NT1_cutoff_0.02_peak_14375	125.1	49	8.55e-20	2.55	0.392157	UP	promoter-TSS (NM_001321424)	NM_001321424	42	388558	NM_001039886	ZNF808	1.3505
chr19	58258121	58258379	1_NT1_cutoff_0.02_peak_14511	99.3	39	6.62e-16	2.55	0.392157	UP	promoter-TSS (NM_173632)	NM_001348007	86	284309	NM_173632	ZNF776	1.3505
chr2	24583184	24583514	3_NTT1_cutoff_0.02_peak_11081	99.3	39	6.62e-16	2.55	0.392157	UP	promoter-TSS (NM_001348185)	NM_001348185	48	50618	NM_006277	ITSN2	1.3505
chr20	44486210	44486399	1_NT1_cutoff_0.02_peak_16790	63.9	25	1.34e-10	2.55	0.392157	UP	promoter-TSS (NM_080752)	NR_037628	85	140831	NM_080752	ZSWIM3	1.3505
chr3	10067865	10068346	1_NT1_cutoff_0.02_peak_18122	150.2	59	2.89e-23	2.55	0.392157	UP	promoter-TSS (NM_033084)	NM_001018115	35	2177	NM_033084	FANCD2	1.3505
chr3	185303973	185304322	1_NT1_cutoff_0.02_peak_19316	125.1	49	8.55e-20	2.55	0.392157	UP	5' UTR (NM_021627, exon 1 of 17)	NM_021627	117	59343	NM_021627	SENP2	1.3505
chr4	7045040	7045208	1_NT1_cutoff_0.02_peak_19615	63.9	25	1.34e-10	2.55	0.392157	UP	promoter-TSS (NM_153376)	NM_152293	-32	93624	NM_152293	TADA2B	1.3505
chr4	84376639	84377500	1_NT1_cutoff_0.02_peak_19946	413.4	162	4.55e-61	2.55	0.392157	UP	promoter-TSS (NM_001297770)	NM_001297769	-15	51023	NM_016067	MRPS18C	1.3505
chr5	133702674	133703107	1_NT1_cutoff_0.02_peak_20904	252.9	99	6.44e-38	2.55	0.392157	UP	promoter-TSS (NM_016508)	NM_001113575	-126	51265	NM_016508	CDKL3	1.3505
chr6	116989601	116990044	1_NT1_cutoff_0.02_peak_22429	127.7	50	6.16e-20	2.55	0.392157	UP	non-coding (NR_154586, exon 1 of 10)	NR_154589	150	221302	NM_145062	ZUP1	1.3505
chr7	111846636	111847076	3_NTT1_cutoff_0.02_peak_17781	53.5	21	3.45e-09	2.55	0.392157	UP	promoter-TSS (NM_014705)	NM_021994	213	11179	NM_021994	ZNF277	1.3505
chr9	82186735	82187111	1_NT1_cutoff_0.02_peak_25661	183.8	72	5.68e-28	2.55	0.392157	UP	non-coding (NR_104239, exon 1 of 21)	NM_001351564	235	7091	NM_007005	TLE4	1.3505
chrX	134654477	134654774	1_NT1_cutoff_0.02_peak_26854	112.2	44	7.5e-18	2.55	0.392157	UP	promoter-TSS (NM_001351606)	NR_046740	-27	100874118	NR_046740	INTS6L-AS1	1.3505
chr1	224586262	224586751	3_NTT1_cutoff_0.02_peak_2221	43.2	17	8.99e-08	2.54	0.393701	UP	promoter-TSS (NR_039896)	NR_039896	-494	100616468	NR_039896	MIR4742	1.34483
chr11	63706379	63706654	3_NTT1_cutoff_0.02_peak_3629	45.7	18	6.37e-08	2.54	0.393701	UP	promoter-TSS (NM_024771)	NM_024771	75	79829	NM_024771	NAA40	1.34483
chr12	19592908	19593125	3_NTT1_cutoff_0.02_peak_4331	43.2	17	8.99e-08	2.54	0.393701	UP	promoter-TSS (NM_001267043)	NM_001114176	409	121536	NM_153207	AEBP2	1.34483
chr17	617899	618322	1_NT1_cutoff_0.02_peak_10412	129.5	51	4.42e-20	2.54	0.393701	UP	promoter-TSS (NM_018289)	NM_001128159	-15	55275	NM_018289	VPS53	1.34483
chr22	43410900	43411562	1_NT1_cutoff_0.02_peak_17922	233.9	92	6.88e-35	2.54	0.393701	UP	promoter-TSS (NM_001349974)	NM_001349974	-49	11252	NM_007229	PACSIN2	1.34483
chr3	42003409	42003573	1_NT1_cutoff_0.02_peak_18287	45.7	18	6.37e-08	2.54	0.393701	UP	intron (NM_001322501, intron 1 of 35)	NM_001322500	441	54986	NM_017886	ULK4	1.34483
chr7	5938107	5938627	1_NT1_cutoff_0.02_peak_23080	226.1	89	4.69e-34	2.54	0.393701	UP	promoter-TSS (NM_015622)	NM_015622	26	51622	NM_015622	CCZ1	1.34483
chr1	236445105	236445375	1_NT1_cutoff_0.02_peak_2920	154.5	61	1.5e-23	2.53	0.395257	UP	promoter-TSS (NM_019891)	NM_019891	99	56605	NM_019891	ERO1B	1.33914
chr11	832692	833720	1_NT1_cutoff_0.02_peak_4223	430.7	170	1.32e-62	2.53	0.395257	UP	intron (NM_139030, intron 1 of 7)	NM_139029	254	977	NM_004357	CD151	1.33914
chr2	203103069	203103523	1_NT1_cutoff_0.02_peak_15889	149.3	59	7.39e-23	2.53	0.395257	UP	promoter-TSS (NM_003352)	NM_003352	26	7341	NM_003352	SUMO1	1.33914
chr3	52443834	52444082	1_NT1_cutoff_0.02_peak_18530	108.7	43	6.82e-17	2.53	0.395257	UP	promoter-TSS (NM_001321127)	NM_004656	163	8314	NM_004656	BAP1	1.33914
chr3	113415398	113415936	3_NTT1_cutoff_0.02_peak_14015	106.2	42	9.54e-17	2.53	0.395257	UP	promoter-TSS (NR_111981)	NR_111981	-174	205717	NM_001009899	USF3	1.33914
chr3	138312806	138313242	3_NTT1_cutoff_0.02_peak_14155	68.2	27	2.66e-11	2.53	0.395257	UP	intron (NM_001288964, intron 1 of 17)	NM_001288964	201	80321	NM_024491	CEP70	1.33914
chr4	48782093	48782410	1_NT1_cutoff_0.02_peak_19752	106.2	42	9.54e-17	2.53	0.395257	UP	promoter-TSS (NM_015030)	NM_015030	64	285527	NM_015030	FRYL	1.33914
chr8	124553327	124553613	3_NTT1_cutoff_0.02_peak_18482	38	15	1.19e-06	2.53	0.395257	UP	promoter-TSS (NM_001242463)	NM_001242463	23	114907	NM_058229	FBXO32	1.33914
chrX	70752825	70753231	1_NT1_cutoff_0.02_peak_26676	151.9	60	5.3e-23	2.53	0.395257	UP	5' UTR (NM_181672, exon 1 of 22)	NM_181673	116	8473	NM_003605	OGT	1.33914
chr11	64661714	64661953	3_NTT1_cutoff_0.02_peak_3659	30.2	12	8.87e-06	2.52	0.396825	UP	promoter-TSS (NR_133640)	NR_133638	-913	105369343	NR_133638	MIR194-2HG	1.33342
chr12	44199743	44200524	1_NT1_cutoff_0.02_peak_5931	359.9	143	6.87e-52	2.52	0.396825	UP	promoter-TSS (NR_073472)	NM_001242397	44	5756	NM_002822	TWF1	1.33342
chr17	78389135	78389586	3_NTT1_cutoff_0.02_peak_9181	133.8	53	2.27e-20	2.52	0.396825	UP	promoter-TSS (NR_029376)	NR_148044	118	284131	NM_173627	ENDOV	1.33342
chr19	18654192	18654467	1_NT1_cutoff_0.02_peak_13566	65.6	26	9.55e-11	2.52	0.396825	UP	promoter-TSS (NM_012181)	NM_001308373	76	23770	NM_012181	FKBP8	1.33342
chr19	57922320	57922717	1_NT1_cutoff_0.02_peak_14504	90.6	36	3e-14	2.52	0.396825	UP	promoter-TSS (NM_001330617)	NM_001330617	4	7565	NM_006959	ZNF17	1.33342
chr2	162164600	162165307	1_NT1_cutoff_0.02_peak_15598	385.8	153	9.7e-56	2.52	0.396825	UP	5' UTR (NM_005805, exon 1 of 12)	NM_005805	168	10213	NM_005805	PSMD14	1.33342
chr3	19987952	19989230	1_NT1_cutoff_0.02_peak_18196	397.9	158	2.91e-57	2.52	0.396825	UP	promoter-TSS (NM_001292048)	NM_001292048	19	5868	NM_004162	RAB5A	1.33342
chr3	52739979	52740588	1_NT1_cutoff_0.02_peak_18546	246.8	98	3.73e-36	2.52	0.396825	UP	promoter-TSS (NM_018446)	NM_001278281	-185	55830	NM_018446	GLT8D1	1.33342
chr19	822130	822465	3_NTT1_cutoff_0.02_peak_9610	27.6	11	3.27e-05	2.51	0.398406	UP	promoter-TSS (NM_001270366)	NM_024888	-346	79948	NM_024888	PLPPR3	1.32769
chr19	3761460	3761771	1_NT1_cutoff_0.02_peak_12967	145.9	58	6.62e-22	2.51	0.398406	UP	promoter-TSS (NM_004886)	NM_004886	57	9546	NM_004886	APBA3	1.32769
chr19	33571881	33572279	1_NT1_cutoff_0.02_peak_13669	165.7	66	1.11e-24	2.51	0.398406	UP	non-coding (NR_135270, exon 1 of 21)	NR_135270	294	55094	NM_018025	GPATCH1	1.32769
chr20	60813568	60813741	1_NT1_cutoff_0.02_peak_16954	55.2	22	2.45e-09	2.51	0.398406	UP	intron (NM_001278649, intron 1 of 12)	NM_001278649	114	9885	NM_014835	OSBPL2	1.32769
chr1	33546451	33546849	1_NT1_cutoff_0.02_peak_697	100.1	40	1.21e-15	2.5	0.4	UP	promoter-TSS (NR_146648)	NM_001350401	-64	113451	NM_052998	AZIN2	1.32193
chr10	88280622	88282108	1_NT1_cutoff_0.02_peak_3652	595.5	238	5.05e-84	2.5	0.4	UP	5' UTR (NM_001318328, exon 1 of 19)	NM_015045	176	23063	NM_015045	WAPL	1.32193
chr17	40169238	40169933	1_NT1_cutoff_0.02_peak_11306	262.4	105	5.66e-38	2.5	0.4	UP	promoter-TSS (NM_001144766)	NM_001001349	-8	28511	NM_017595	NKIRAS2	1.32193
chr2	68289901	68290441	1_NT1_cutoff_0.02_peak_15094	225.3	90	5.47e-33	2.5	0.4	UP	promoter-TSS (NM_001190265)	NM_001190263	-12	10438	NM_006333	C1D	1.32193
chr4	41992287	41992928	1_NT1_cutoff_0.02_peak_19736	214.9	86	3.31e-31	2.5	0.4	UP	promoter-TSS (NM_006345)	NM_006345	85	10463	NM_006345	SLC30A9	1.32193
chr7	42971591	42972178	1_NT1_cutoff_0.02_peak_23290	252.9	101	1.36e-36	2.5	0.4	UP	promoter-TSS (NM_002787)	NM_031903	-54	64983	NM_031903	MRPL32	1.32193
chr7	102036615	102037179	1_NT1_cutoff_0.02_peak_23840	145	58	1.66e-21	2.5	0.4	UP	promoter-TSS (NM_024653)	NM_024653	93	79706	NM_024653	PRKRIP1	1.32193
chr1	53480452	53480771	1_NT1_cutoff_0.02_peak_1108	62.1	25	3.42e-10	2.49	0.401606	UP	promoter-TSS (NM_001007250)	NM_001007250	2	6342	NM_002979	SCP2	1.31615
chr10	103347687	103348247	1_NT1_cutoff_0.02_peak_3827	179.5	72	2.32e-26	2.49	0.401606	UP	promoter-TSS (NM_001329743)	NR_033406	60	27343	NM_013274	POLL	1.31615
chr17	61850670	61851070	1_NT1_cutoff_0.02_peak_11761	144.1	58	1.66e-21	2.49	0.401606	UP	promoter-TSS (NM_203499)	NM_020198	218	57003	NM_020198	CCDC47	1.31615
chr19	36119457	36120274	1_NT1_cutoff_0.02_peak_13737	405.7	163	3.43e-57	2.49	0.401606	UP	promoter-TSS (NM_024321)	NM_001319113	-52	79171	NM_024321	RBM42	1.31615
chr19	57862360	57862750	1_NT1_cutoff_0.02_peak_14500	132.1	53	5.72e-20	2.49	0.401606	UP	promoter-TSS (NM_001290319)	NM_020657	-87	57343	NM_020657	ZNF304	1.31615
chr2	122512814	122513548	3_NTT1_cutoff_0.02_peak_11642	182.1	73	6.62e-27	2.49	0.401606	UP	promoter-TSS (NR_048557)	NM_001261401	60	7247	NM_004622	TSN	1.31615
chr3	129158510	129158933	1_NT1_cutoff_0.02_peak_18904	132.1	53	5.72e-20	2.49	0.401606	UP	promoter-TSS (NM_018262)	NM_052989	-157	55764	NM_018262	IFT122	1.31615
chr3	196159175	196159460	3_NTT1_cutoff_0.02_peak_14491	64.7	26	2.41e-10	2.49	0.401606	UP	promoter-TSS (NM_015562)	NM_015562	27	26043	NM_015562	UBXN7	1.31615
chr4	20253325	20253729	1_NT1_cutoff_0.02_peak_19664	393.6	158	1.15e-55	2.49	0.401606	UP	promoter-TSS (NM_004787)	NM_004787	-1	9353	NM_004787	SLIT2	1.31615
chr4	147443542	147443730	1_NT1_cutoff_0.02_peak_20165	44.9	18	1.61e-07	2.49	0.401606	UP	promoter-TSS (NM_001317817)	NM_001029998	-513	84068	NM_032128	SLC10A7	1.31615
chr8	59323629	59324131	1_NT1_cutoff_0.02_peak_24600	199.4	80	3.95e-29	2.49	0.401606	UP	promoter-TSS (NM_001330535)	NM_001077619	57	137886	NM_001077619	UBXN2B	1.31615
chr8	145624252	145624758	3_NTT1_cutoff_0.02_peak_18614	87.2	35	1.07e-13	2.49	0.401606	UP	intron (NM_013291, intron 15 of 37)	NR_106908	1234	102466749	NR_106908	MIR6849	1.31615
chr11	46958168	46958495	3_NTT1_cutoff_0.02_peak_3460	82	33	1.34e-12	2.48	0.403226	UP	promoter-TSS (NM_024113)	NM_001003678	92	79096	NM_024113	C11orf49	1.31034
chr12	4429760	4430574	1_NT1_cutoff_0.02_peak_5605	434.1	175	6.24e-61	2.48	0.403226	UP	promoter-TSS (NM_020375)	NM_020375	-192	57103	NM_020375	TIGAR	1.31034
chr12	120933530	120934770	1_NT1_cutoff_0.02_peak_6953	608.5	245	1.2e-84	2.48	0.403226	UP	promoter-TSS (NR_038854)	NM_003746	291	8655	NM_003746	DYNLL1	1.31034
chr16	72127305	72127875	3_NTT1_cutoff_0.02_peak_7764	164	66	6.96e-24	2.48	0.403226	UP	promoter-TSS (NM_001324354)	NM_014003	-25	9785	NM_014003	DHX38	1.31034
chr16	75682344	75682587	3_NTT1_cutoff_0.02_peak_7797	57	23	4.34e-09	2.48	0.403226	UP	promoter-TSS (NM_001130089)	NM_018975	831	54386	NM_018975	TERF2IP	1.31034
chr17	26903702	26904295	3_NTT1_cutoff_0.02_peak_8295	79.4	32	1.89e-12	2.48	0.403226	UP	promoter-TSS (NM_005165)	NM_005165	-48	230	NM_005165	ALDOC	1.31034
chr5	175874772	175875768	3_NTT1_cutoff_0.02_peak_15986	523.9	211	6.14e-73	2.48	0.403226	UP	promoter-TSS (NM_014613)	NM_014613	-86	23197	NM_014613	FAF2	1.31034
chr9	104296086	104296348	1_NT1_cutoff_0.02_peak_25859	79.4	32	1.89e-12	2.48	0.403226	UP	promoter-TSS (NM_019592)	NM_019592	86	56254	NM_019592	RNF20	1.31034
chr1	211848179	211849148	3_NTT1_cutoff_0.02_peak_2115	103.6	42	1.52e-15	2.47	0.404858	UP	promoter-TSS (NR_148994)	NM_001204182	308	4751	NM_002497	NEK2	1.30451
chr14	36789665	36789871	1_NT1_cutoff_0.02_peak_7865	71.6	29	3.37e-11	2.47	0.404858	UP	exon (NM_001308110, exon 1 of 8)	NM_001144891	114	51562	NM_016586	MBIP	1.30451
chr16	83986707	83987033	1_NT1_cutoff_0.02_peak_10264	69	28	4.78e-11	2.47	0.404858	UP	promoter-TSS (NM_182981)	NM_182981	43	29948	NM_013370	OSGIN1	1.30451
chr17	39890727	39890984	1_NT1_cutoff_0.02_peak_11270	106.2	43	4.32e-16	2.47	0.404858	UP	promoter-TSS (NM_177977)	NM_177977	42	9001	NM_003949	HAP1	1.30451
chr19	17420234	17420574	1_NT1_cutoff_0.02_peak_13513	207.1	84	1.01e-29	2.47	0.404858	UP	promoter-TSS (NM_024050)	NM_024050	67	79016	NM_024050	DDA1	1.30451
chr20	48531877	48532171	1_NT1_cutoff_0.02_peak_16837	145.9	59	2.94e-21	2.47	0.404858	UP	promoter-TSS (NM_006038)	NM_006038	56	9825	NM_006038	SPATA2	1.30451
chr22	28315951	28316130	1_NT1_cutoff_0.02_peak_17491	34.5	14	4.32e-06	2.47	0.404858	UP	promoter-TSS (NM_012399)	NR_036170	-473	100422998	NR_036170	MIR3199-2	1.30451
chr22	30722742	30723412	1_NT1_cutoff_0.02_peak_17556	183	74	2.92e-26	2.47	0.404858	UP	promoter-TSS (NM_001204240)	NM_031937	-122	83874	NM_031937	TBC1D10A	1.30451
chr1	156676514	156676751	3_NTT1_cutoff_0.02_peak_1673	31.9	13	1.56e-05	2.46	0.406504	UP	Intergenic	NM_001199723	-1025	1382	NM_001878	CRABP2	1.29866
chr11	64851300	64851904	1_NT1_cutoff_0.02_peak_4864	170	69	1e-24	2.46	0.406504	UP	promoter-TSS (NM_080668)	NM_080668	13	113130	NM_080668	CDCA5	1.29866
chr11	71639905	71640148	3_NTT1_cutoff_0.02_peak_3863	98.4	40	7.56e-15	2.46	0.406504	UP	promoter-TSS (NR_029192)	NR_024147	259	55298	NM_018320	RNF121	1.29866
chr12	65563926	65564444	3_NTT1_cutoff_0.02_peak_4699	66.5	27	1.7e-10	2.46	0.406504	UP	exon (NM_001167614, exon 1 of 13)	NM_014319	834	23592	NM_014319	LEMD3	1.29866
chr12	100661032	100661366	1_NT1_cutoff_0.02_peak_6749	110.5	45	2.15e-16	2.46	0.406504	UP	promoter-TSS (NM_001319311)	NM_001330253	37	55681	NM_017988	SCYL2	1.29866
chr17	4166977	4167426	1_NT1_cutoff_0.02_peak_10515	167.4	68	3.5e-24	2.46	0.406504	UP	promoter-TSS (NR_047571)	NM_001257999	-60	51479	NM_016376	ANKFY1	1.29866
chr17	29233048	29233753	1_NT1_cutoff_0.02_peak_11017	258.1	105	2.17e-36	2.46	0.406504	UP	promoter-TSS (NM_024683)	NM_024683	-115	79736	NM_024683	TEFM	1.29866
chr17	48503484	48503705	3_NTT1_cutoff_0.02_peak_8793	31.9	13	1.56e-05	2.46	0.406504	UP	promoter-TSS (NM_001288968)	NM_025149	76	80221	NM_025149	ACSF2	1.29866
chr19	36236518	36236728	1_NT1_cutoff_0.02_peak_13748	83.7	34	9.41e-13	2.46	0.406504	UP	promoter-TSS (NM_144987)	NM_001281532	145	55851	NM_172341	PSENEN	1.29866
chr19	37157575	37157873	3_NTT1_cutoff_0.02_peak_10383	83.7	34	9.41e-13	2.46	0.406504	UP	promoter-TSS (NM_001322823)	NM_001322821	31	92283	NM_153257	ZNF461	1.29866
chr19	39833009	39833244	3_NTT1_cutoff_0.02_peak_10437	115.7	47	4.34e-17	2.46	0.406504	UP	promoter-TSS (NM_018028)	NM_001303614	28	55095	NM_018028	SAMD4B	1.29866
chr19	49375360	49375886	1_NT1_cutoff_0.02_peak_14239	352.1	143	4.12e-49	2.46	0.406504	UP	promoter-TSS (NM_014330)	NM_014330	-26	23645	NM_014330	PPP1R15A	1.29866
chr2	27805509	27806137	1_NT1_cutoff_0.02_peak_14812	167.4	68	3.5e-24	2.46	0.406504	UP	promoter-TSS (NM_001271287)	NM_032434	-13	84450	NM_032434	ZNF512	1.29866
chr20	44485841	44486154	1_NT1_cutoff_0.02_peak_16789	132.9	54	2.51e-19	2.46	0.406504	UP	promoter-TSS (NM_080752)	NM_005469	50	10005	NM_005469	ACOT8	1.29866
chr22	39052556	39052895	1_NT1_cutoff_0.02_peak_17785	150.2	61	5.94e-22	2.46	0.406504	UP	promoter-TSS (NM_001291030)	NM_015373	68	25776	NM_015373	CBY1	1.29866
chr3	142166699	142167158	1_NT1_cutoff_0.02_peak_19011	152.8	62	4.21e-22	2.46	0.406504	UP	promoter-TSS (NM_001282857)	NM_001282857	-25	54464	NM_019001	XRN1	1.29866
chr8	53626898	53627332	1_NT1_cutoff_0.02_peak_24579	150.2	61	5.94e-22	2.46	0.406504	UP	promoter-TSS (NM_014781)	NM_014781	-89	9821	NM_014781	RB1CC1	1.29866
chr9	134955070	134955399	3_NTT1_cutoff_0.02_peak_19287	49.2	20	3.15e-08	2.46	0.406504	UP	promoter-TSS (NM_004269)	NM_001253882	39	9442	NM_004269	MED27	1.29866
chrX	119077489	119077781	3_NTT1_cutoff_0.02_peak_19727	81.1	33	1.34e-12	2.46	0.406504	UP	promoter-TSS (NM_024528)	NM_024528	100	79576	NM_024528	NKAP	1.29866
chr1	154246001	154246275	3_NTT1_cutoff_0.02_peak_1530	29.3	12	2.26e-05	2.45	0.408163	UP	intron (NM_001018837, intron 2 of 6)	NM_001018837	1099	10456	NM_006118	HAX1	1.29278
chr12	122984947	122985652	1_NT1_cutoff_0.02_peak_7014	294.3	120	5.56e-41	2.45	0.408163	UP	exon (NM_001350935, exon 1 of 11)	NM_001350936	249	55596	NM_017612	ZCCHC8	1.29278
chr17	1617795	1618541	1_NT1_cutoff_0.02_peak_10460	169.2	69	2.48e-24	2.45	0.408163	UP	promoter-TSS (NR_029494)	NR_029494	-887	407004	NR_029494	MIR22	1.29278
chr17	74068013	74068311	3_NTT1_cutoff_0.02_peak_9127	29.3	12	2.26e-05	2.45	0.408163	UP	intron (NM_014230, intron 1 of 15)	NR_048541	445	6730	NM_014230	SRP68	1.29278
chr18	66382087	66382653	3_NTT1_cutoff_0.02_peak_9550	134.6	55	1.77e-19	2.45	0.408163	UP	promoter-TSS (NM_019022)	NM_001350517	40	54495	NM_019022	TMX3	1.29278
chr19	2475683	2479735	1_NT1_cutoff_0.02_peak_12911	5169.9	2109	0	2.45	0.408163	UP	3' UTR (NM_015675, exon 4 of 4)	NM_015675	1586	4616	NM_015675	GADD45B	1.29278
chr19	19302674	19303132	3_NTT1_cutoff_0.02_peak_10263	242.5	99	6.31e-34	2.45	0.408163	UP	promoter-TSS (NM_001278728)	NM_003721	-105	8625	NM_003721	RFXANK	1.29278
chr19	21579801	21580039	3_NTT1_cutoff_0.02_peak_10296	78.5	32	4.71e-12	2.45	0.408163	UP	promoter-TSS (NM_145326)	NM_001076678	-1	284443	NM_145326	ZNF493	1.29278
chr20	42219470	42219819	1_NT1_cutoff_0.02_peak_16742	73.4	30	2.37e-11	2.45	0.408163	UP	5' UTR (NM_001323581, exon 1 of 15)	NM_001303459	392	51098	NM_016004	IFT52	1.29278
chr3	139062712	139063186	1_NT1_cutoff_0.02_peak_18992	105.3	43	1.07e-15	2.45	0.408163	UP	promoter-TSS (NM_020191)	NM_020191	88	56945	NM_020191	MRPS22	1.29278
chr6	138188313	138188712	1_NT1_cutoff_0.02_peak_22508	88	36	1.88e-13	2.45	0.408163	UP	5' UTR (NM_001270508, exon 1 of 9)	NM_001270507	188	7128	NM_006290	TNFAIP3	1.29278
chr9	114423771	114424089	1_NT1_cutoff_0.02_peak_25902	88	36	1.88e-13	2.45	0.408163	UP	promoter-TSS (NM_001198664)	NM_001198664	79	2790	NM_001017998	GNG10	1.29278
chrX	48814751	48814993	3_NTT1_cutoff_0.02_peak_19564	73.4	30	2.37e-11	2.45	0.408163	UP	promoter-TSS (NM_001136158)	NM_017602	21	55593	NM_017602	OTUD5	1.29278
chr1	33430221	33430685	3_NTT1_cutoff_0.02_peak_506	214.9	88	6.24e-30	2.44	0.409836	UP	promoter-TSS (NM_001300826)	NM_001300826	-39	127544	NM_153341	RNF19B	1.28688
chr1	33938167	33938428	1_NT1_cutoff_0.02_peak_719	82.9	34	2.32e-12	2.44	0.409836	UP	promoter-TSS (NM_145238)	NM_145238	66	7579	NM_145238	ZSCAN20	1.28688
chr11	62572555	62573313	1_NT1_cutoff_0.02_peak_4767	638.7	262	1.33e-85	2.44	0.409836	UP	promoter-TSS (NM_006362)	NM_001081491	30	10482	NM_006362	NXF1	1.28688
chr11	117049325	117049655	1_NT1_cutoff_0.02_peak_5377	70.8	29	8.32e-11	2.44	0.409836	UP	promoter-TSS (NM_001040455)	NM_001040455	-449	51092	NM_015996	SIDT2	1.28688
chr12	56367108	56367496	1_NT1_cutoff_0.02_peak_6246	68.2	28	1.19e-10	2.44	0.409836	UP	promoter-TSS (NM_001252036)	NM_001252036	-395	5869	NM_002868	RAB5B	1.28688
chr15	49447608	49448164	1_NT1_cutoff_0.02_peak_8690	197.6	81	1.05e-27	2.44	0.409836	UP	promoter-TSS (NM_004236)	NM_001143887	-32	9318	NM_004236	COPS2	1.28688
chr17	60143056	60143430	1_NT1_cutoff_0.02_peak_11746	124.3	51	4.34e-18	2.44	0.409836	UP	promoter-TSS (NM_005121)	NM_005121	-600	9969	NM_005121	MED13	1.28688
chr19	3970722	3972079	3_NTT1_cutoff_0.02_peak_9769	1077.1	442	3.27e-143	2.44	0.409836	UP	promoter-TSS (NM_001348)	NM_001348	-280	1613	NM_001348	DAPK3	1.28688
chr19	19029945	19030302	1_NT1_cutoff_0.02_peak_13581	217.5	89	1.8e-30	2.44	0.409836	UP	promoter-TSS (NM_019070)	NM_007263	75	11316	NM_007263	COPE	1.28688
chr2	8977576	8977828	3_NTT1_cutoff_0.02_peak_11023	68.2	28	1.19e-10	2.44	0.409836	UP	promoter-TSS (NR_145964)	NM_020738	67	57498	NM_020738	KIDINS220	1.28688
chr9	131798769	131799020	3_NTT1_cutoff_0.02_peak_19253	56.1	23	4.34e-09	2.44	0.409836	UP	promoter-TSS (NM_032809)	NR_138421	105	84895	NM_032809	MIGA2	1.28688
chr9	133588289	133588623	1_NT1_cutoff_0.02_peak_26172	112.2	46	1.52e-16	2.44	0.409836	UP	promoter-TSS (NM_007313)	NM_007313	-812	25	NM_005157	ABL1	1.28688
chr1	151170722	151171784	1_NT1_cutoff_0.02_peak_1739	505.8	208	8.4e-68	2.43	0.411523	UP	5' UTR (NM_001330689, exon 1 of 15)	NM_001135636	232	8394	NM_003557	PIP5K1A	1.28096
chr1	224621588	224622082	1_NT1_cutoff_0.02_peak_2734	196.8	81	2.56e-27	2.43	0.411523	UP	promoter-TSS (NR_136288)	NM_025160	166	80232	NM_025160	WDR26	1.28096
chr17	36981399	36981867	1_NT1_cutoff_0.02_peak_11179	187.3	77	2.54e-26	2.43	0.411523	UP	promoter-TSS (NM_017748)	NM_017748	-30	54883	NM_017748	CWC25	1.28096
chr19	12721356	12721984	1_NT1_cutoff_0.02_peak_13296	303.8	125	2.4e-41	2.43	0.411523	UP	promoter-TSS (NM_020714)	NM_020714	-47	57474	NM_020714	ZNF490	1.28096
chr2	232063061	232063538	1_NT1_cutoff_0.02_peak_16113	157.9	65	3.61e-22	2.43	0.411523	UP	promoter-TSS (NM_001291656)	NM_001352755	-27	80210	NM_025139	ARMC9	1.28096
chr3	49377273	49377944	1_NT1_cutoff_0.02_peak_18416	373.7	154	2.26e-50	2.43	0.411523	UP	promoter-TSS (NM_001251877)	NM_003363	-73	7375	NM_003363	USP4	1.28096
chr3	183892487	183892998	1_NT1_cutoff_0.02_peak_19273	175.2	72	8.72e-25	2.43	0.411523	UP	5' UTR (NM_004068, exon 1 of 12)	NM_001311198	109	1173	NM_004068	AP2M1	1.28096
chr9	127905595	127905872	1_NT1_cutoff_0.02_peak_25983	65.6	27	4.19e-10	2.43	0.411523	UP	5' UTR (NM_173690, exon 1 of 19)	NM_001144877	104	286205	NM_173690	SCAI	1.28096
chr1	11986149	11986621	3_NTT1_cutoff_0.02_peak_129	113.9	47	2.6e-16	2.42	0.413223	UP	promoter-TSS (NM_138346)	NM_138346	100	90231	NM_138346	KIAA2013	1.27501
chr1	62190424	62191346	1_NT1_cutoff_0.02_peak_1160	271	112	4.68e-37	2.42	0.413223	UP	non-coding (NR_135162, exon 1 of 8)	NM_032027	210	83941	NM_032027	TM2D1	1.27501
chr11	59382547	59383341	1_NT1_cutoff_0.02_peak_4659	198.5	82	1.8e-27	2.42	0.413223	UP	exon (NM_002556, exon 1 of 14)	NM_002556	673	5007	NM_002556	OSBP	1.27501
chr12	58087817	58088135	1_NT1_cutoff_0.02_peak_6383	101.8	42	9.16e-15	2.42	0.413223	UP	exon (NM_006812, exon 1 of 15)	NM_001261421	238	10956	NM_006812	OS9	1.27501
chr12	110841859	110842129	1_NT1_cutoff_0.02_peak_6843	72.5	30	5.81e-11	2.42	0.413223	UP	promoter-TSS (NM_001137664)	NM_016238	-459	51434	NM_016238	ANAPC7	1.27501
chr14	58666430	58667131	1_NT1_cutoff_0.02_peak_7994	176.9	73	1.49e-24	2.42	0.413223	UP	promoter-TSS (NM_018477)	NM_018477	-52	55860	NM_018477	ACTR10	1.27501
chr17	79008803	79009192	1_NT1_cutoff_0.02_peak_12113	319.3	132	3.52e-43	2.42	0.413223	UP	promoter-TSS (NM_017451)	NM_006340	51	10458	NM_006340	BAIAP2	1.27501
chr2	200819974	200820740	1_NT1_cutoff_0.02_peak_15855	348.7	144	6.27e-47	2.42	0.413223	UP	non-coding (NR_004862, exon 1 of 8)	NR_004862	102	129450	NM_152382	TYW5	1.27501
chr20	34824268	34824593	1_NT1_cutoff_0.02_peak_16664	147.6	61	8.78e-21	2.42	0.413223	UP	promoter-TSS (NM_001271874)	NM_015511	92	25980	NM_015511	AAR2	1.27501
chr5	150080212	150080964	1_NT1_cutoff_0.02_peak_21186	365.1	151	3.79e-49	2.42	0.413223	UP	promoter-TSS (NM_018047)	NM_018047	81	55696	NM_018047	RBM22	1.27501
chr5	173315188	173315522	1_NT1_cutoff_0.02_peak_21357	251.2	104	2.69e-34	2.42	0.413223	UP	promoter-TSS (NM_030627)	NM_001308191	24	80315	NM_030627	CPEB4	1.27501
chrX	47077026	47077884	3_NTT1_cutoff_0.02_peak_19537	225.3	93	4.45e-31	2.42	0.413223	UP	promoter-TSS (NM_033018)	NM_033018	-73	5127	NM_006201	CDK16	1.27501
chr1	184723738	184724068	1_NT1_cutoff_0.02_peak_2407	137.2	57	2.14e-19	2.41	0.414938	UP	non-coding (NR_135118, exon 1 of 21)	NM_025191	138	80267	NM_025191	EDEM3	1.26903
chr10	32344333	32345620	1_NT1_cutoff_0.02_peak_3243	441	183	1.26e-58	2.41	0.414938	UP	5' UTR (NM_004521, exon 1 of 26)	NM_004521	394	3799	NM_004521	KIF5B	1.26903
chr10	85899006	85899748	1_NT1_cutoff_0.02_peak_3649	214	89	2.6e-29	2.41	0.414938	UP	intron (NM_014394, intron 1 of 8)	NM_014394	192	27069	NM_014394	GHITM	1.26903
chr11	6255761	6255920	1_NT1_cutoff_0.02_peak_4297	82	34	5.63e-12	2.41	0.414938	UP	promoter-TSS (NM_001098794)	NM_032127	100	84067	NM_032127	FAM160A2	1.26903
chr13	37633165	37634092	1_NT1_cutoff_0.02_peak_7265	308.1	128	2.03e-41	2.41	0.414938	UP	promoter-TSS (NM_001278482)	NM_001278482	-5	55578	NM_017569	SUPT20H	1.26903
chr15	101142180	101142530	3_NTT1_cutoff_0.02_peak_7046	79.4	33	8.09e-12	2.41	0.414938	UP	promoter-TSS (NM_001352508)	NR_148017	90	55180	NM_018148	LINS1	1.26903
chr19	19843794	19844078	3_NTT1_cutoff_0.02_peak_10286	94.1	39	6.51e-14	2.41	0.414938	UP	promoter-TSS (NM_021030)	NM_021030	-15	7561	NM_021030	ZNF14	1.26903
chr19	48972480	48972881	1_NT1_cutoff_0.02_peak_14226	185.6	77	1.5e-25	2.41	0.414938	UP	5' UTR (NM_004228, exon 1 of 12)	NM_017457	216	9266	NM_004228	CYTH2	1.26903
chr19	50084467	50084760	3_NTT1_cutoff_0.02_peak_10735	69.9	29	2.03e-10	2.41	0.414938	UP	promoter-TSS (NM_015953)	NM_001316335	27	5639	NM_000951	PRRG2	1.26903
chr2	20646630	20647087	3_NTT1_cutoff_0.02_peak_11066	453.1	188	3.75e-60	2.41	0.414938	UP	promoter-TSS (NM_004040)	NM_004040	27	388	NM_004040	RHOB	1.26903
chr2	48132638	48133657	1_NT1_cutoff_0.02_peak_14985	219.2	91	5.3e-30	2.41	0.414938	UP	promoter-TSS (NM_001190274)	NM_001190274	-216	80204	NM_012167	FBXO11	1.26903
chr5	41903850	41904641	1_NT1_cutoff_0.02_peak_20459	282.2	117	3.34e-38	2.41	0.414938	UP	promoter-TSS (NM_175921)	NM_175921	-200	285636	NM_175921	C5orf51	1.26903
chr5	112043021	112043517	3_NTT1_cutoff_0.02_peak_15428	170.9	71	1.78e-23	2.41	0.414938	UP	promoter-TSS (NM_001354902)	NM_001127511	67	324	NM_000038	APC	1.26903
chr6	37225446	37225752	3_NTT1_cutoff_0.02_peak_16436	94.1	39	6.51e-14	2.41	0.414938	UP	promoter-TSS (NM_145316)	NR_130108	119	55633	NM_017772	TBC1D22B	1.26903
chr8	64081501	64081806	3_NTT1_cutoff_0.02_peak_18200	69.9	29	2.03e-10	2.41	0.414938	UP	promoter-TSS (NM_001277818)	NM_001277818	92	253943	NM_152758	YTHDF3	1.26903
chr8	133787473	133787839	1_NT1_cutoff_0.02_peak_25037	195.1	81	6.22e-27	2.41	0.414938	UP	promoter-TSS (NM_198513)	NM_198513	52	51105	NM_016018	PHF20L1	1.26903
chr1	89356961	89357666	1_NT1_cutoff_0.02_peak_1320	331.4	138	4.26e-44	2.4	0.416667	UP	promoter-TSS (NM_001514)	NM_001514	-13	2959	NM_001514	GTF2B	1.26303
chr1	197115214	197116509	3_NTT1_cutoff_0.02_peak_1970	98.4	41	3.18e-14	2.4	0.416667	UP	promoter-TSS (NM_018136)	NM_018136	-38	259266	NM_018136	ASPM	1.26303
chr11	10821878	10822656	1_NT1_cutoff_0.02_peak_4380	86.3	36	1.13e-12	2.4	0.416667	UP	TTS (NR_004403)	NR_004403	888	692223	NR_004403	SNORD97	1.26303
chr11	62558718	62559750	1_NT1_cutoff_0.02_peak_4765	448.8	187	7.45e-59	2.4	0.416667	UP	TTS (NM_006362)	NM_001080501	252	79064	NM_001080501	TMEM223	1.26303
chr13	20207380	20207958	3_NTT1_cutoff_0.02_peak_5194	163.1	68	1.25e-22	2.4	0.416667	UP	promoter-TSS (NM_017520)	NM_017520	-119	54737	NM_017520	MPHOSPH8	1.26303
chr14	59655419	59655597	1_NT1_cutoff_0.02_peak_8018	33.7	14	1.07e-05	2.4	0.416667	UP	intron (NM_001270520, intron 1 of 24)	NM_001270520	127	23002	NM_014992	DAAM1	1.26303
chr16	4421749	4422057	1_NT1_cutoff_0.02_peak_9507	95.8	40	1.1e-13	2.4	0.416667	UP	promoter-TSS (NM_138440)	NM_138440	54	114990	NM_138440	VASN	1.26303
chr17	42580607	42581286	1_NT1_cutoff_0.02_peak_11419	225.3	94	1.83e-30	2.4	0.416667	UP	promoter-TSS (NM_001304942)	NM_001304939	23	23131	NM_001002909	GPATCH8	1.26303
chr19	17378175	17378459	1_NT1_cutoff_0.02_peak_13509	101	42	2.22e-14	2.4	0.416667	UP	5' UTR (NM_014173, exon 1 of 9)	NM_001033549	132	29086	NM_014173	BABAM1	1.26303
chr2	27274015	27274810	1_NT1_cutoff_0.02_peak_14762	367.7	153	1.1e-48	2.4	0.416667	UP	promoter-TSS (NR_104246)	NM_021831	-78	60509	NM_021831	AGBL5	1.26303
chr2	240964564	240965220	3_NTT1_cutoff_0.02_peak_12217	276.2	115	3.94e-37	2.4	0.416667	UP	promoter-TSS (NM_001322019)	NM_004544	-73	4705	NM_004544	NDUFA10	1.26303
chr5	74807272	74807492	1_NT1_cutoff_0.02_peak_20670	86.3	36	1.13e-12	2.4	0.416667	UP	promoter-TSS (NM_001345922)	NM_005713	72	10087	NM_005713	COL4A3BP	1.26303
chr5	139682401	139682975	1_NT1_cutoff_0.02_peak_21045	268.4	112	6.61e-36	2.4	0.416667	UP	promoter-TSS (NM_002622)	NM_002622	1	5201	NM_002622	PFDN1	1.26303
chr6	42531657	42532188	1_NT1_cutoff_0.02_peak_22043	165.7	69	8.74e-23	2.4	0.416667	UP	5' UTR (NM_015255, exon 1 of 47)	NM_015255	163	23304	NM_015255	UBR2	1.26303
chr9	86323629	86323828	3_NTT1_cutoff_0.02_peak_18894	33.7	14	1.07e-05	2.4	0.416667	UP	promoter-TSS (NM_013438)	NR_135840	483	105376114	NR_135839	LOC105376114	1.26303
chr9	128023754	128024266	3_NTT1_cutoff_0.02_peak_19114	151	63	4.32e-21	2.4	0.416667	UP	promoter-TSS (NM_001354293)	NM_001282680	-63	26130	NM_015635	GAPVD1	1.26303
chr15	44091963	44092242	3_NTT1_cutoff_0.02_peak_6489	52.6	22	3.75e-08	2.39	0.41841	UP	promoter-TSS (NM_001199885)	NM_001258031	192	619189	NM_001258031	SERINC4	1.25701
chr16	3929517	3930360	3_NTT1_cutoff_0.02_peak_7227	112.2	47	6.3e-16	2.39	0.41841	UP	5' UTR (NM_001079846, exon 1 of 30)	NM_004380	182	1387	NM_004380	CREBBP	1.25701
chr3	20227482	20228181	1_NT1_cutoff_0.02_peak_18199	145.9	61	5.11e-20	2.39	0.41841	UP	promoter-TSS (NM_001199255)	NM_001012410	-107	151648	NM_138484	SGO1	1.25701
chr4	36245392	36245812	3_NTT1_cutoff_0.02_peak_14703	71.6	30	1.41e-10	2.39	0.41841	UP	promoter-TSS (NR_146893)	NR_146893	-41	116984	NM_015230	ARAP2	1.25701
chr5	1344983	1345544	3_NTT1_cutoff_0.02_peak_15155	336.6	141	3.53e-44	2.39	0.41841	UP	promoter-TSS (NM_030782)	NM_030782	-79	81037	NM_030782	CLPTM1L	1.25701
chr6_dbb_hap3	3374959	3375418	3_NTT1_cutoff_0.02_peak_16985	40.6	17	1.42e-06	2.39	0.41841	UP	promoter-TSS (NM_004381)	NM_001136153	0	1388	NM_004381	ATF6B	1.25701
chr8	30669839	30670474	1_NT1_cutoff_0.02_peak_24482	217.5	91	3.07e-29	2.39	0.41841	UP	5' UTR (NM_001009552, exon 1 of 7)	NM_001009552	195	5516	NM_004156	PPP2CB	1.25701
chr1	20834319	20834924	3_NTT1_cutoff_0.02_peak_231	281.4	118	3.26e-37	2.38	0.420168	UP	promoter-TSS (NM_024544)	NM_024544	52	79594	NM_024544	MUL1	1.25096
chr1	28585747	28586291	1_NT1_cutoff_0.02_peak_578	261.5	110	1.85e-34	2.38	0.420168	UP	promoter-TSS (NM_031459)	NM_031459	56	83667	NM_031459	SESN2	1.25096
chr1	247267463	247267781	1_NT1_cutoff_0.02_peak_2976	188.2	79	1.77e-25	2.38	0.420168	UP	promoter-TSS (NR_147502)	NM_024804	52	79862	NM_024804	ZNF669	1.25096
chr10	51572321	51572541	3_NTT1_cutoff_0.02_peak_2696	59.6	25	5.13e-09	2.38	0.420168	UP	promoter-TSS (NM_005437)	NM_005437	67	8031	NM_005437	NCOA4	1.25096
chr3	113465545	113466085	1_NT1_cutoff_0.02_peak_18776	107	45	3.12e-15	2.38	0.420168	UP	promoter-TSS (NM_025146)	NM_001690	-51	523	NM_001690	ATP6V1A	1.25096
chr4	107237581	107238112	1_NT1_cutoff_0.02_peak_20008	231.3	97	6.29e-31	2.38	0.420168	UP	promoter-TSS (NM_033115)	NM_001163436	14	93627	NM_033115	TBCK	1.25096
chr8	54755455	54756149	1_NT1_cutoff_0.02_peak_24580	309.9	130	1.38e-40	2.38	0.420168	UP	promoter-TSS (NM_213620)	NM_015941	69	51606	NM_015941	ATP6V1H	1.25096
chr9	35748851	35749502	3_NTT1_cutoff_0.02_peak_18797	245.1	103	1.29e-32	2.38	0.420168	UP	promoter-TSS (NM_001080496)	NM_020944	48	57704	NM_020944	GBA2	1.25096
chr1	165737772	165738769	3_NTT1_cutoff_0.02_peak_1750	610.2	257	5.74e-78	2.37	0.421941	UP	promoter-TSS (NM_019026)	NR_125374	105	100147773	NR_125374	LOC100147773	1.24489
chr1	228327381	228327715	1_NT1_cutoff_0.02_peak_2805	149.3	63	2.49e-20	2.37	0.421941	UP	promoter-TSS (NM_001242839)	NM_001242839	-237	2987	NM_000858	GUK1	1.24489
chr11	10828875	10829144	1_NT1_cutoff_0.02_peak_4389	57	24	1.78e-08	2.37	0.421941	UP	intron (NM_001042559, intron 1 of 20)	NM_001172705	533	1982	NM_001418	EIF4G2	1.24489
chr11	66886627	66886906	1_NT1_cutoff_0.02_peak_5014	92.4	39	3.8e-13	2.37	0.421941	UP	promoter-TSS (NR_027473)	NR_027473	27	22992	NM_012308	KDM2A	1.24489
chr12	65563011	65563654	1_NT1_cutoff_0.02_peak_6437	291.7	123	5.45e-38	2.37	0.421941	UP	promoter-TSS (NM_001167614)	NM_001167614	-18	23592	NM_014319	LEMD3	1.24489
chr14	76127621	76128005	1_NT1_cutoff_0.02_peak_8203	63.9	27	2.44e-09	2.37	0.421941	UP	promoter-TSS (NM_007176)	NM_015072	262	23093	NM_015072	TTLL5	1.24489
chr16	29985057	29985583	1_NT1_cutoff_0.02_peak_9778	225.3	95	7.34e-30	2.37	0.421941	UP	TTS (NM_194280)	NM_004783	132	9344	NM_004783	TAOK2	1.24489
chr17	79212689	79212903	1_NT1_cutoff_0.02_peak_12119	73.4	31	9.75e-11	2.37	0.421941	UP	promoter-TSS (NM_001086521)	NM_144679	95	146705	NM_144679	TEPSIN	1.24489
chr17	80009594	80009972	3_NTT1_cutoff_0.02_peak_9250	149.3	63	2.49e-20	2.37	0.421941	UP	promoter-TSS (NM_212492)	NM_004127	42	2873	NM_004127	GPS1	1.24489
chr2	74374785	74375319	1_NT1_cutoff_0.02_peak_15161	210.6	89	8.55e-28	2.37	0.421941	UP	promoter-TSS (NR_045634)	NM_001035505	-13	388962	NM_212552	BOLA3	1.24489
chr22	25843961	25844280	1_NT1_cutoff_0.02_peak_17478	113.9	48	1.05e-15	2.37	0.421941	UP	promoter-TSS (NR_033733)	NR_033734	67	1416	NR_033733	CRYBB2P1	1.24489
chr3	37034909	37035704	1_NT1_cutoff_0.02_peak_18252	258.1	109	6.3e-34	2.37	0.421941	UP	promoter-TSS (NM_014805)	NM_001354619	466	4292	NM_000249	MLH1	1.24489
chr4	110354527	110355183	1_NT1_cutoff_0.02_peak_20026	225.3	95	7.34e-30	2.37	0.421941	UP	promoter-TSS (NM_001318085)	NM_001318085	-16	10427	NM_006323	SEC24B	1.24489
chr7	99007213	99007466	3_NTT1_cutoff_0.02_peak_17571	19	8	0.00159	2.37	0.421941	UP	intron (NM_003910, intron 1 of 5)	NM_003910	739	8896	NM_003910	BUD31	1.24489
chr9	128003107	128004555	3_NTT1_cutoff_0.02_peak_19113	677.5	286	7.65e-86	2.37	0.421941	UP	promoter-TSS (NM_005347)	NM_005347	-165	3309	NM_005347	HSPA5	1.24489
chrX	69509585	69510082	1_NT1_cutoff_0.02_peak_26656	73.4	31	9.75e-11	2.37	0.421941	UP	promoter-TSS (NM_016484)	NM_016484	-36	51248	NM_016484	PDZD11	1.24489
chrX	128674179	128674493	1_NT1_cutoff_0.02_peak_26826	63.9	27	2.44e-09	2.37	0.421941	UP	promoter-TSS (NM_001587)	NM_001587	84	4952	NM_000276	OCRL	1.24489
chr1	225997693	225998068	1_NT1_cutoff_0.02_peak_2745	309	131	1.29e-39	2.36	0.423729	UP	promoter-TSS (NM_001291163)	NM_001291163	45	2052	NM_000120	EPHX1	1.23879
chr11	47586859	47587374	3_NTT1_cutoff_0.02_peak_3486	153.6	65	1.2e-20	2.36	0.423729	UP	5' UTR (NM_001143984, exon 1 of 2)	NM_175732	135	114971	NM_175732	PTPMT1	1.23879
chr11	63606474	63606791	1_NT1_cutoff_0.02_peak_4792	108.7	46	5.18e-15	2.36	0.423729	UP	5' UTR (NM_004954, exon 1 of 17)	NM_001163296	233	2011	NM_004954	MARK2	1.23879
chr12	112563217	112563628	1_NT1_cutoff_0.02_peak_6883	139	59	1.42e-18	2.36	0.423729	UP	promoter-TSS (NM_001143906)	NM_001143906	74	10906	NM_006700	TRAFD1	1.23879
chr13	80054974	80055810	3_NTT1_cutoff_0.02_peak_5491	217.5	92	1.22e-28	2.36	0.423729	UP	promoter-TSS (NR_046685)	NR_046685	-26	100874208	NR_046685	NDFIP2-AS1	1.23879
chr14	74111323	74111788	1_NT1_cutoff_0.02_peak_8146	224.4	95	1.74e-29	2.36	0.423729	UP	promoter-TSS (NM_031427)	NM_031427	-22	83544	NM_031427	DNAL1	1.23879
chr2	62081399	62082106	3_NTT1_cutoff_0.02_peak_11322	106.2	45	7.46e-15	2.36	0.423729	UP	promoter-TSS (NM_032180)	NM_001201543	-475	84140	NM_032180	FAM161A	1.23879
chr2	224809964	224810196	3_NTT1_cutoff_0.02_peak_12131	61.3	26	3.54e-09	2.36	0.423729	UP	promoter-TSS (NM_020830)	NM_020830	24	57590	NM_020830	WDFY1	1.23879
chr3	182817089	182817383	1_NT1_cutoff_0.02_peak_19259	80.3	34	1.35e-11	2.36	0.423729	UP	promoter-TSS (NR_120640)	NM_001293273	139	56922	NM_020166	MCCC1	1.23879
chr4	186317805	186318413	3_NTT1_cutoff_0.02_peak_15134	290	123	3.06e-37	2.36	0.423729	UP	intron (NM_181726, intron 1 of 4)	NM_181726	269	353322	NM_181726	ANKRD37	1.23879
chr6	170861723	170862514	1_NT1_cutoff_0.02_peak_22675	238.2	101	3.56e-31	2.36	0.423729	UP	intron (NM_002793, intron 1 of 5)	NM_002793	298	5689	NM_002793	PSMB1	1.23879
chr8	67579266	67579539	1_NT1_cutoff_0.02_peak_24630	96.7	41	1.82e-13	2.36	0.423729	UP	promoter-TSS (NM_019607)	NM_025054	49	80124	NM_025054	VCPIP1	1.23879
chr9	127951862	127952355	1_NT1_cutoff_0.02_peak_25984	321.1	136	1.61e-41	2.36	0.423729	UP	5' UTR (NM_002721, exon 1 of 7)	NM_002721	109	5537	NM_002721	PPP6C	1.23879
chr9	131133310	131133881	3_NTT1_cutoff_0.02_peak_19151	212.3	90	5.96e-28	2.36	0.423729	UP	promoter-TSS (NM_001135947)	NM_001135947	-2	81605	NM_030914	URM1	1.23879
chrX	53254162	53254933	1_NT1_cutoff_0.02_peak_26615	359	152	2.9e-46	2.36	0.423729	UP	promoter-TSS (NM_001146702)	NM_001353982	56	8242	NM_004187	KDM5C	1.23879
chr12	62860931	62861194	3_NTT1_cutoff_0.02_peak_4691	42.3	18	9.71e-07	2.35	0.425532	UP	exon (NM_001278471, exon 1 of 34)	NM_001278470	466	23041	NM_015026	MON2	1.23266
chr12	120907028	120907775	1_NT1_cutoff_0.02_peak_6952	253.7	108	1.2e-32	2.35	0.425532	UP	promoter-TSS (NM_001037494)	NM_003769	156	8683	NM_003769	SRSF9	1.23266
chr13	26626009	26626326	3_NTT1_cutoff_0.02_peak_5248	51.8	22	8.98e-08	2.35	0.425532	UP	promoter-TSS (NM_001007538)	NM_001007538	-970	387914	NM_001007538	SHISA2	1.23266
chr14	35008729	35009032	1_NT1_cutoff_0.02_peak_7849	124.3	53	7.12e-17	2.35	0.425532	UP	promoter-TSS (NM_001318916)	NM_001318916	62	55837	NM_018453	EAPP	1.23266
chr15	65902887	65903063	3_NTT1_cutoff_0.02_peak_6657	25.9	11	0.000199	2.35	0.425532	UP	promoter-TSS (NM_001301033)	NR_045106	511	81556	NM_030800	INTS14	1.23266
chr17	38296251	38297114	1_NT1_cutoff_0.02_peak_11235	369.4	157	4.8e-47	2.35	0.425532	UP	5' UTR (NM_007359, exon 1 of 14)	NM_007359	176	22794	NM_007359	CASC3	1.23266
chr17	77005474	77005986	3_NTT1_cutoff_0.02_peak_9159	107.9	46	1.22e-14	2.35	0.425532	UP	intron (NM_001159772, intron 1 of 5)	NM_138793	169	124583	NM_138793	CANT1	1.23266
chr19	9420261	9420486	1_NT1_cutoff_0.02_peak_13144	75.1	32	6.74e-11	2.35	0.425532	UP	promoter-TSS (NM_198535)	NM_198535	16	374879	NM_198535	ZNF699	1.23266
chr19	42773349	42773578	3_NTT1_cutoff_0.02_peak_10547	51.8	22	8.98e-08	2.35	0.425532	UP	intron (NM_001304815, intron 1 of 20)	NM_001304815	775	23152	NM_015125	CIC	1.23266
chr19	55770083	55770538	1_NT1_cutoff_0.02_peak_14435	268.4	114	1.04e-34	2.35	0.425532	UP	promoter-TSS (NM_014931)	NM_014931	-273	22870	NM_014931	PPP6R1	1.23266
chr20	32399074	32399352	1_NT1_cutoff_0.02_peak_16525	110.5	47	3.59e-15	2.35	0.425532	UP	promoter-TSS (NR_110623)	NM_176812	103	128866	NM_176812	CHMP4B	1.23266
chr3	39093298	39093616	1_NT1_cutoff_0.02_peak_18271	126.9	54	4.93e-17	2.35	0.425532	UP	promoter-TSS (NM_020839)	NM_001346226	-20	57599	NM_020839	WDR48	1.23266
chr4	100737956	100738157	1_NT1_cutoff_0.02_peak_19986	51.8	22	8.98e-08	2.35	0.425532	UP	promoter-TSS (NM_001306151)	NM_001306151	67	27071	NM_014395	DAPP1	1.23266
chr5	32174145	32174822	1_NT1_cutoff_0.02_peak_20411	310.7	132	9.01e-40	2.35	0.425532	UP	promoter-TSS (NM_022130)	NM_022130	-59	64083	NM_022130	GOLPH3	1.23266
chr5	153418117	153418796	1_NT1_cutoff_0.02_peak_21228	427.2	182	6.1e-54	2.35	0.425532	UP	promoter-TSS (NM_001317994)	NM_018691	41	10827	NM_018691	FAM114A2	1.23266
chr7	100880015	100880275	3_NTT1_cutoff_0.02_peak_17672	25.9	11	0.000199	2.35	0.425532	UP	intron (NM_001185080, intron 2 of 5)	NM_014343	1082	24146	NM_014343	CLDN15	1.23266
chr7	102311902	102312198	1_NT1_cutoff_0.02_peak_23849	124.3	53	7.12e-17	2.35	0.425532	UP	5' UTR (NM_032959, exon 1 of 9)	NM_032959	126	246721	NM_032958	POLR2J2	1.23266
chr8	118532778	118533148	1_NT1_cutoff_0.02_peak_24876	91.5	39	9.03e-13	2.35	0.425532	UP	promoter-TSS (NM_080651)	NM_001282986	11	90390	NM_080651	MED30	1.23266
chrX	100663173	100663442	1_NT1_cutoff_0.02_peak_26739	75.1	32	6.74e-11	2.35	0.425532	UP	promoter-TSS (NM_000169)	NM_019597	187	3188	NM_019597	HNRNPH2	1.23266
chr12	57940528	57941135	3_NTT1_cutoff_0.02_peak_4676	227	97	4.68e-29	2.34	0.42735	UP	promoter-TSS (NM_001348065)	NM_001348065	-190	10540	NM_006400	DCTN2	1.22651
chr14	23057858	23058260	1_NT1_cutoff_0.02_peak_7715	158.8	68	9.49e-21	2.34	0.42735	UP	promoter-TSS (NM_001344)	NM_001344	84	1603	NM_001344	DAD1	1.22651
chr16	11890924	11891650	1_NT1_cutoff_0.02_peak_9566	280.5	120	1.18e-35	2.34	0.42735	UP	promoter-TSS (NM_014153)	NM_014153	-173	29066	NM_014153	ZC3H7A	1.22651
chr16	46654801	46655457	3_NTT1_cutoff_0.02_peak_7571	39.7	17	3.39e-06	2.34	0.42735	UP	intron (NM_024745, intron 1 of 12)	NM_024745	182	79801	NM_024745	SHCBP1	1.22651
chr17	16284110	16284886	1_NT1_cutoff_0.02_peak_10780	693.9	297	2.49e-85	2.34	0.42735	UP	promoter-TSS (NM_001281719)	NM_001281720	87	7314	NM_018955	UBB	1.22651
chr17	36003295	36003595	1_NT1_cutoff_0.02_peak_11139	114.8	49	1.72e-15	2.34	0.42735	UP	promoter-TSS (NM_007010)	NM_007010	48	11056	NM_007010	DDX52	1.22651
chr19	35739615	35740300	3_NTT1_cutoff_0.02_peak_10341	429	183	9.98e-54	2.34	0.42735	UP	exon (NM_205835, exon 1 of 8)	NM_205835	399	51599	NM_015925	LSR	1.22651
chr19	37808690	37809006	1_NT1_cutoff_0.02_peak_13791	147.6	63	1.39e-19	2.34	0.42735	UP	promoter-TSS (NR_138104)	NR_138107	64	284459	NM_181786	HKR1	1.22651
chr21	9968468	9968711	3_NTT1_cutoff_0.02_peak_12819	32.8	14	2.57e-05	2.34	0.42735	UP	promoter-TSS (NR_038329)	NR_038327	4	100132288	NM_174948	TEKT4P2	1.22651
chr3	195269832	195270326	1_NT1_cutoff_0.02_peak_19432	194.2	83	2.35e-25	2.34	0.42735	UP	non-coding (NR_133014, exon 1 of 5)	NR_133014	145	5504	NM_006241	PPP1R2	1.22651
chr4	54243612	54244037	1_NT1_cutoff_0.02_peak_19773	158.8	68	9.49e-21	2.34	0.42735	UP	promoter-TSS (NM_001134937)	NM_001134938	5	81608	NM_030917	FIP1L1	1.22651
chr6	42713525	42714042	3_NTT1_cutoff_0.02_peak_16466	164	70	1.94e-21	2.34	0.42735	UP	promoter-TSS (NM_001318819)	NM_003192	100	6903	NM_003192	TBCC	1.22651
chr7	131012489	131012834	1_NT1_cutoff_0.02_peak_24092	157.1	67	5.82e-21	2.34	0.42735	UP	promoter-TSS (NM_013255)	NM_013255	67	4289	NM_013255	MKLN1	1.22651
chrX	40945346	40945545	3_NTT1_cutoff_0.02_peak_19494	32.8	14	2.57e-05	2.34	0.42735	UP	intron (NM_001039590, intron 1 of 44)	NM_001039591	558	8239	NM_004652	USP9X	1.22651
chr1	42800452	42801395	1_NT1_cutoff_0.02_peak_901	340.1	146	1.02e-42	2.33	0.429185	UP	promoter-TSS (NM_001198851)	NM_014947	-21	22887	NM_014947	FOXJ3	1.22033
chr11	46638539	46639286	3_NTT1_cutoff_0.02_peak_3456	189	81	1.14e-24	2.33	0.429185	UP	promoter-TSS (NM_001346338)	NM_001346329	87	9776	NM_014741	ATG13	1.22033
chr14	78227023	78227644	1_NT1_cutoff_0.02_peak_8235	219.2	94	3.28e-28	2.33	0.429185	UP	5' UTR (NM_001173978, exon 1 of 2)	NM_174943	161	283579	NM_174943	C14orf178	1.22033
chr16	3661323	3662179	1_NT1_cutoff_0.02_peak_9484	251.2	108	6.58e-32	2.33	0.429185	UP	promoter-TSS (NM_032444)	NM_032444	-144	84464	NM_032444	SLX4	1.22033
chr3	5163819	5164249	3_NTT1_cutoff_0.02_peak_13444	186.4	80	3.87e-24	2.33	0.429185	UP	5' UTR (NM_018184, exon 1 of 7)	NM_018184	104	55207	NM_018184	ARL8B	1.22033
chr3	39194886	39195177	1_NT1_cutoff_0.02_peak_18273	190.7	82	1.86e-24	2.33	0.429185	UP	promoter-TSS (NM_033027)	NM_033027	70	64651	NM_033027	CSRNP1	1.22033
chr3	49055321	49056363	3_NTT1_cutoff_0.02_peak_13727	347	149	3.41e-43	2.33	0.429185	UP	exon (NM_001276405, exon 1 of 12)	NM_001009996	199	55152	NM_018114	DALRD3	1.22033
chr4	2845058	2845827	1_NT1_cutoff_0.02_peak_19567	265.8	114	1.35e-33	2.33	0.429185	UP	promoter-TSS (NM_001354757)	NM_001354754	-141	118	NM_001119	ADD1	1.22033
chr5	175788489	175788952	1_NT1_cutoff_0.02_peak_21365	358.2	154	1.01e-44	2.33	0.429185	UP	promoter-TSS (NM_001287336)	NR_109800	89	57179	NM_020444	KIAA1191	1.22033
chr6	111137094	111137273	3_NTT1_cutoff_0.02_peak_16736	23.3	10	0.000296	2.33	0.429185	UP	promoter-TSS (NM_001300963)	NM_001300964	-96	23097	NM_015076	CDK19	1.22033
chr9	136242731	136243219	1_NT1_cutoff_0.02_peak_26213	226.1	97	4.68e-29	2.33	0.429185	UP	promoter-TSS (NM_001280789)	NM_001280793	62	6836	NM_033161	SURF4	1.22033
chr1	53703968	53704549	3_NTT1_cutoff_0.02_peak_868	196.8	85	6.15e-25	2.32	0.431034	UP	promoter-TSS (NR_038953)	NM_002370	23	4116	NM_002370	MAGOH	1.21412
chr1	86861819	86862073	3_NTT1_cutoff_0.02_peak_1007	74.2	32	1.59e-10	2.32	0.431034	UP	promoter-TSS (NM_020729)	NM_001184765	79	57489	NM_020729	ODF2L	1.21412
chr1	153330198	153330410	3_NTT1_cutoff_0.02_peak_1465	67.3	29	1.15e-09	2.32	0.431034	UP	promoter-TSS (NM_002965)	NM_002965	-26	6280	NM_002965	S100A9	1.21412
chr1	217804202	217804536	1_NT1_cutoff_0.02_peak_2664	220.1	95	5.31e-28	2.32	0.431034	UP	promoter-TSS (NM_018040)	NM_018040	85	55105	NM_018040	GPATCH2	1.21412
chr15	80215838	80216502	1_NT1_cutoff_0.02_peak_8998	248.6	107	2.21e-31	2.32	0.431034	UP	promoter-TSS (NM_001199760)	NR_037653	-74	400410	NM_001100879	ST20	1.21412
chr16	2653184	2653653	3_NTT1_cutoff_0.02_peak_7162	220.1	95	5.31e-28	2.32	0.431034	UP	promoter-TSS (NR_015441)	NR_015441	34	652276	NR_015441	LOC652276	1.21412
chr17	8066030	8066427	3_NTT1_cutoff_0.02_peak_8149	144.1	62	4.73e-19	2.32	0.431034	UP	promoter-TSS (NM_014232)	NM_001330125	-35	6844	NM_014232	VAMP2	1.21412
chr18	21033581	21033729	1_NT1_cutoff_0.02_peak_12424	30.2	13	3.79e-05	2.32	0.431034	UP	intron (NM_003831, intron 1 of 12)	NM_001348193	470	8780	NM_003831	RIOK3	1.21412
chr3	9773333	9773580	1_NT1_cutoff_0.02_peak_18102	90.6	39	2.12e-12	2.32	0.431034	UP	promoter-TSS (NM_001319050)	NM_004634	23	7862	NM_004634	BRPF1	1.21412
chr5	95158269	95158515	1_NT1_cutoff_0.02_peak_20733	37.1	16	4.98e-06	2.32	0.431034	UP	5' UTR (NM_002064, exon 1 of 3)	NM_001243659	185	2745	NM_002064	GLRX	1.21412
chr9	95640141	95640436	3_NTT1_cutoff_0.02_peak_18947	60.4	26	8.4e-09	2.32	0.431034	UP	promoter-TSS (NM_001354536)	NM_001261459	31	83744	NM_031486	ZNF484	1.21412
chr9	132586107	132586554	1_NT1_cutoff_0.02_peak_26144	188.2	81	2.68e-24	2.32	0.431034	UP	exon (NM_000113, exon 1 of 5)	NM_000113	110	1861	NM_000113	TOR1A	1.21412
chr1	28414985	28415259	1_NT1_cutoff_0.02_peak_569	108.7	47	1.97e-14	2.31	0.4329	UP	promoter-TSS (NR_104214)	NM_001282560	26	2140	NM_001990	EYA3	1.20789
chr10	92631604	92631879	3_NTT1_cutoff_0.02_peak_2923	78.5	34	7.53e-11	2.31	0.4329	UP	promoter-TSS (NM_001104546)	NM_006413	33	10556	NM_006413	RPP30	1.20789
chr11	94706548	94707134	1_NT1_cutoff_0.02_peak_5275	180.4	78	4.39e-23	2.31	0.4329	UP	promoter-TSS (NM_018039)	NM_018039	-4	55693	NM_018039	KDM4D	1.20789
chr14	21905097	21905731	1_NT1_cutoff_0.02_peak_7703	152.8	66	1.08e-19	2.31	0.4329	UP	promoter-TSS (NM_020920)	NM_020920	43	57680	NM_020920	CHD8	1.20789
chr16	50402554	50403013	1_NT1_cutoff_0.02_peak_9928	133.8	58	2.62e-17	2.31	0.4329	UP	promoter-TSS (NM_001173984)	NM_001173984	61	29117	NM_013263	BRD7	1.20789
chr4	149363785	149364029	1_NT1_cutoff_0.02_peak_20169	113.1	49	4.03e-15	2.31	0.4329	UP	promoter-TSS (NM_001166104)	NR_148974	-235	4306	NM_000901	NR3C2	1.20789
chr5	56469706	56470364	1_NT1_cutoff_0.02_peak_20524	159.7	69	1.53e-20	2.31	0.4329	UP	5' UTR (NM_022913, exon 1 of 12)	NM_022913	260	65056	NM_022913	GPBP1	1.20789
chr1	151735538	151735693	1_NT1_cutoff_0.02_peak_1757	48.3	21	3.1e-07	2.3	0.434783	UP	promoter-TSS (NM_001301371)	NM_001134939	171	51686	NM_016178	OAZ3	1.20163
chr1	155658281	155659241	1_NT1_cutoff_0.02_peak_1957	548.1	238	4.18e-66	2.3	0.434783	UP	promoter-TSS (NM_033657)	NM_139121	3	55249	NM_018253	YY1AP1	1.20163
chr1	224301504	224302383	3_NTT1_cutoff_0.02_peak_2176	466.1	203	3.62e-56	2.3	0.434783	UP	non-coding (NR_049764, exon 1 of 4)	NM_001136115	155	23219	NM_015176	FBXO28	1.20163
chr11	6256383	6256596	1_NT1_cutoff_0.02_peak_4298	34.5	15	1.74e-05	2.3	0.434783	UP	promoter-TSS (NM_001098794)	NM_001098794	-549	84067	NM_032127	FAM160A2	1.20163
chr14	50053510	50053841	3_NTT1_cutoff_0.02_peak_5885	55.2	24	4.21e-08	2.3	0.434783	UP	promoter-TSS (NM_001032)	NM_001032	-542	6235	NM_001032	RPS29	1.20163
chr17	3749222	3749650	1_NT1_cutoff_0.02_peak_10508	176.9	77	3.4e-22	2.3	0.434783	UP	exon (NM_001114118, exon 1 of 13)	NM_001114118	109	55421	NM_018553	NCBP3	1.20163
chr17	46184597	46185326	3_NTT1_cutoff_0.02_peak_8764	246	107	2.75e-30	2.3	0.434783	UP	promoter-TSS (NM_013323)	NM_013323	15	29916	NM_013323	SNX11	1.20163
chr17	56429187	56429853	3_NTT1_cutoff_0.02_peak_8841	266.7	116	8.06e-33	2.3	0.434783	UP	promoter-TSS (NR_073470)	NM_003168	79	6827	NM_003168	SUPT4H1	1.20163
chr19	21688240	21688539	3_NTT1_cutoff_0.02_peak_10297	76	33	2.55e-10	2.3	0.434783	UP	promoter-TSS (NM_001346914)	NR_144526	36	353088	NM_001001415	ZNF429	1.20163
chr2	219126237	219126433	3_NTT1_cutoff_0.02_peak_12090	20.7	9	0.00106	2.3	0.434783	UP	intron (NM_170699, intron 1 of 1)	NM_001077194	597	151306	NM_170699	GPBAR1	1.20163
chr3	11683932	11684545	3_NTT1_cutoff_0.02_peak_13505	62.1	27	5.76e-09	2.3	0.434783	UP	intron (NM_014667, intron 2 of 5)	NM_001128219	1212	9686	NM_014667	VGLL4	1.20163
chr4	184580107	184580728	1_NT1_cutoff_0.02_peak_20283	237.4	103	1.21e-29	2.3	0.434783	UP	promoter-TSS (NM_152682)	NM_199053	-2	60684	NM_021942	TRAPPC11	1.20163
chr5	179028849	179039366	3_NTT1_cutoff_0.02_peak_16053	3862.3	1676	0	2.3	0.434783	UP	intron (NM_001040451, intron 15 of 16)	NR_110560	-3366	101928445	NR_110560	LOC101928445	1.20163
chr7	44613167	44613979	1_NT1_cutoff_0.02_peak_23332	396.2	172	2.58e-48	2.3	0.434783	UP	5' UTR (NM_019082, exon 1 of 14)	NM_019082	564	54606	NM_019082	DDX56	1.20163
chr9	33934041	33934244	3_NTT1_cutoff_0.02_peak_18759	13.8	6	0.00883	2.3	0.434783	UP	TTS (NR_102370)	NM_001282530	219	55833	NM_018449	UBAP2	1.20163
chr1	231473274	231474231	1_NT1_cutoff_0.02_peak_2850	430.7	188	1.34e-51	2.29	0.436681	UP	promoter-TSS (NM_032018)	NM_032018	71	83932	NM_032018	SPRTN	1.19535
chr12	133757985	133758195	1_NT1_cutoff_0.02_peak_7154	52.6	23	1.44e-07	2.29	0.436681	UP	promoter-TSS (NM_001165887)	NM_001165882	30	10795	NM_003415	ZNF268	1.19535
chr14	31091220	31091841	1_NT1_cutoff_0.02_peak_7835	268.4	117	5.57e-33	2.29	0.436681	UP	promoter-TSS (NM_001257376)	NM_001257376	6	23256	NM_016106	SCFD1	1.19535
chr14	58764410	58764966	1_NT1_cutoff_0.02_peak_8014	221.8	97	3.13e-27	2.29	0.436681	UP	promoter-TSS (NM_002892)	NR_029435	167	379025	NR_029434	PSMA3-AS1	1.19535
chr16	58663509	58664211	1_NT1_cutoff_0.02_peak_10000	290.9	127	2.6e-35	2.29	0.436681	UP	promoter-TSS (NM_001265612)	NM_016284	-70	23019	NM_016284	CNOT1	1.19535
chr17	40172001	40172312	1_NT1_cutoff_0.02_peak_11307	139.8	61	8.56e-18	2.29	0.436681	UP	promoter-TSS (NM_001144927)	NM_017595	70	28511	NM_017595	NKIRAS2	1.19535
chr2	198318136	198318869	1_NT1_cutoff_0.02_peak_15829	348.7	152	3.25e-42	2.29	0.436681	UP	promoter-TSS (NM_001320819)	NM_001320820	15	80219	NM_025147	COQ10B	1.19535
chr20	56964053	56964929	3_NTT1_cutoff_0.02_peak_12710	252	110	3.93e-31	2.29	0.436681	UP	non-coding (NR_036633, exon 1 of 4)	NM_001195677	316	9217	NM_004738	VAPB	1.19535
chr3	45730737	45731119	1_NT1_cutoff_0.02_peak_18324	167.4	73	3.47e-21	2.29	0.436681	UP	promoter-TSS (NR_033947)	NM_001319072	195	22908	NM_014016	SACM1L	1.19535
chr3	137906013	137906519	1_NT1_cutoff_0.02_peak_18985	105.3	46	6.65e-14	2.29	0.436681	UP	5' UTR (NM_213654, exon 1 of 13)	NM_001267042	176	25852	NM_014154	ARMC8	1.19535
chr3	184016583	184017246	1_NT1_cutoff_0.02_peak_19283	292.6	128	1.8e-35	2.29	0.436681	UP	promoter-TSS (NM_002808)	NM_002808	29	5708	NM_002808	PSMD2	1.19535
chr4	17616024	17616517	1_NT1_cutoff_0.02_peak_19661	185.6	81	3.34e-23	2.29	0.436681	UP	promoter-TSS (NM_025205)	NM_025205	20	80306	NM_025205	MED28	1.19535
chr7	99097712	99098209	1_NT1_cutoff_0.02_peak_23723	176.1	77	3.4e-22	2.29	0.436681	UP	promoter-TSS (NM_032164)	NM_032164	-30	84124	NM_032164	ZNF394	1.19535
chr7	155436757	155437742	1_NT1_cutoff_0.02_peak_24248	314.2	137	2.31e-38	2.29	0.436681	UP	promoter-TSS (NR_126344)	NM_053043	47	155435	NM_053043	RBM33	1.19535
chr8	38033560	38034574	3_NTT1_cutoff_0.02_peak_18110	340.9	149	5.18e-41	2.29	0.436681	UP	promoter-TSS (NM_001204878)	NM_001204878	-39	9530	NM_004874	BAG4	1.19535
chr9	117349616	117350499	1_NT1_cutoff_0.02_peak_25930	362.5	158	6.7e-44	2.29	0.436681	UP	promoter-TSS (NM_004888)	NM_004888	64	9550	NM_004888	ATP6V1G1	1.19535
chr1	24151691	24152114	1_NT1_cutoff_0.02_peak_439	209.7	92	1.06e-25	2.28	0.438596	UP	promoter-TSS (NM_001166059)	NM_001166059	46	3155	NM_000191	HMGCL	1.18903
chr12	4757964	4758472	1_NT1_cutoff_0.02_peak_5609	180.4	79	1.62e-22	2.28	0.438596	UP	promoter-TSS (NM_001278309)	NM_001278309	-5	10566	NM_006422	AKAP3	1.18903
chr14	104028732	104029091	1_NT1_cutoff_0.02_peak_8376	125.1	55	4.28e-16	2.28	0.438596	UP	promoter-TSS (NR_126431)	NM_001015048	239	9529	NM_004873	BAG5	1.18903
chr16	27561006	27561566	1_NT1_cutoff_0.02_peak_9725	159.7	70	5.61e-20	2.28	0.438596	UP	promoter-TSS (NM_015202)	NM_001286242	-35	2975	NM_001520	GTF3C1	1.18903
chr2	201390400	201391111	1_NT1_cutoff_0.02_peak_15859	139	61	1.96e-17	2.28	0.438596	UP	promoter-TSS (NM_001160033)	NM_001160033	-109	151246	NM_152524	SGO2	1.18903
chr3	97483116	97483701	1_NT1_cutoff_0.02_peak_18687	141.5	62	5.89e-18	2.28	0.438596	UP	promoter-TSS (NR_136597)	NR_136600	44	84100	NM_032146	ARL6	1.18903
chr5	133983898	133985068	3_NTT1_cutoff_0.02_peak_15550	505.8	222	1.42e-59	2.28	0.438596	UP	promoter-TSS (NM_021982)	NM_001252231	8	10802	NM_021982	SEC24A	1.18903
chr6	43477890	43478341	3_NTT1_cutoff_0.02_peak_16502	125.1	55	4.28e-16	2.28	0.438596	UP	promoter-TSS (NM_001271882)	NM_001271882	-35	221424	NM_001012974	LRRC73	1.18903
chr9	130742623	130742842	3_NTT1_cutoff_0.02_peak_19135	31.9	14	5.99e-05	2.28	0.438596	UP	promoter-TSS (NM_001035254)	NM_001035254	79	399665	NM_203305	FAM102A	1.18903
chr1	894430	894774	1_NT1_cutoff_0.02_peak_10	122.6	54	1.43e-15	2.27	0.440529	UP	promoter-TSS (NM_015658)	NM_015658	77	26155	NM_015658	NOC2L	1.18269
chr1	32110153	32110460	1_NT1_cutoff_0.02_peak_637	122.6	54	1.43e-15	2.27	0.440529	UP	promoter-TSS (NM_001359651)	NM_001359651	-89	553115	NM_012392	PEF1	1.18269
chr1	38019684	38019975	1_NT1_cutoff_0.02_peak_796	86.3	38	1.66e-11	2.27	0.440529	UP	exon (NM_024700, exon 1 of 4)	NM_024700	115	79753	NM_024700	SNIP1	1.18269
chr1	45965441	45966173	1_NT1_cutoff_0.02_peak_1024	118.2	52	3.03e-15	2.27	0.440529	UP	promoter-TSS (NM_001330540)	NM_001330540	-49	25974	NM_015506	MMACHC	1.18269
chr1	114354562	114355460	1_NT1_cutoff_0.02_peak_1524	265.8	117	6.68e-32	2.27	0.440529	UP	promoter-TSS (NR_130896)	NR_130896	87	54665	NM_018364	RSBN1	1.18269
chr1	156095522	156095690	3_NTT1_cutoff_0.02_peak_1616	18.1	8	0.00159	2.27	0.440529	UP	promoter-TSS (NM_001282624)	NM_001282624	-302	4000	NM_005572	LMNA	1.18269
chr10	64892801	64893280	1_NT1_cutoff_0.02_peak_3447	199.4	88	2.45e-24	2.27	0.440529	UP	promoter-TSS (NM_030759)	NM_030759	34	29982	NM_030759	NRBF2	1.18269
chr12	95397271	95397676	1_NT1_cutoff_0.02_peak_6702	158.8	70	1.28e-19	2.27	0.440529	UP	promoter-TSS (NM_018838)	NM_018838	15	55967	NM_018838	NDUFA12	1.18269
chr16	50775977	50776167	1_NT1_cutoff_0.02_peak_9930	43.2	19	1.56e-06	2.27	0.440529	UP	promoter-TSS (NR_130462)	NM_001042412	43	1540	NM_015247	CYLD	1.18269
chr19	19431528	19431836	1_NT1_cutoff_0.02_peak_13605	154.5	68	2.71e-19	2.27	0.440529	UP	promoter-TSS (NM_015329)	NM_015329	52	23383	NM_015329	MAU2	1.18269
chr22	50220400	50220622	3_NTT1_cutoff_0.02_peak_13389	36.2	16	1.17e-05	2.27	0.440529	UP	promoter-TSS (NM_001304809)	NM_001304809	-963	23774	NM_014577	BRD1	1.18269
chr3	196295187	196295878	1_NT1_cutoff_0.02_peak_19467	260.7	115	3.2e-31	2.27	0.440529	UP	promoter-TSS (NM_001345914)	NM_001345914	12	348793	NM_182627	WDR53	1.18269
chr3	196594415	196594993	1_NT1_cutoff_0.02_peak_19471	304.7	134	1.93e-36	2.27	0.440529	UP	promoter-TSS (NM_001308045)	NM_152699	-23	205564	NM_152699	SENP5	1.18269
chr6	49430768	49431274	1_NT1_cutoff_0.02_peak_22140	108.7	48	7.17e-14	2.27	0.440529	UP	promoter-TSS (NM_018132)	NM_000255	20	4594	NM_000255	MUT	1.18269
chr1	154244515	154245419	1_NT1_cutoff_0.02_peak_1868	363.4	161	1.36e-42	2.26	0.442478	UP	promoter-TSS (NM_006118)	NM_006118	-72	10456	NM_006118	HAX1	1.17632
chr1	185125369	185126192	1_NT1_cutoff_0.02_peak_2410	316.8	140	2.06e-37	2.26	0.442478	UP	promoter-TSS (NM_001105518)	NM_030934	335	81627	NM_030934	TRMT1L	1.17632
chr1	226374237	226374926	1_NT1_cutoff_0.02_peak_2765	509.2	225	2.4e-59	2.26	0.442478	UP	promoter-TSS (NM_022735)	NM_022735	-159	64746	NM_022735	ACBD3	1.17632
chr10	32667621	32667769	1_NT1_cutoff_0.02_peak_3246	29.3	13	8.94e-05	2.26	0.442478	UP	promoter-TSS (NM_001282391)	NM_001282391	31	80314	NM_025209	EPC1	1.17632
chr11	118442954	118443482	3_NTT1_cutoff_0.02_peak_4128	194.2	86	1.18e-23	2.26	0.442478	UP	5' UTR (NM_001142281, exon 1 of 9)	NM_001142281	116	372	NM_001655	ARCN1	1.17632
chr12	57913224	57913865	1_NT1_cutoff_0.02_peak_6373	157.9	70	2.9e-19	2.26	0.442478	UP	promoter-TSS (NR_030346)	NR_030346	-503	693201	NR_030346	MIR616	1.17632
chr14	35761228	35761948	1_NT1_cutoff_0.02_peak_7860	196.8	87	8.09e-24	2.26	0.442478	UP	promoter-TSS (NM_002791)	NM_001282233	65	5687	NM_002791	PSMA6	1.17632
chr20	30865343	30865630	1_NT1_cutoff_0.02_peak_16512	76.8	34	3.99e-10	2.26	0.442478	UP	promoter-TSS (NM_004798)	NM_004798	33	9371	NM_004798	KIF3B	1.17632
chr20	61903906	61904378	1_NT1_cutoff_0.02_peak_16996	171.8	76	5.9e-21	2.26	0.442478	UP	promoter-TSS (NM_018209)	NM_001281484	5	55738	NM_018209	ARFGAP1	1.17632
chr4	925909	926504	1_NT1_cutoff_0.02_peak_19527	223.5	99	7.69e-27	2.26	0.442478	UP	promoter-TSS (NM_001318134)	NM_005255	-29	2580	NM_005255	GAK	1.17632
chr4	2010526	2010853	3_NTT1_cutoff_0.02_peak_14598	94.9	42	3.63e-12	2.26	0.442478	UP	exon (NM_005663, exon 1 of 11)	NM_005663	272	7469	NM_005663	NELFA	1.17632
chr5	140699982	140700588	1_NT1_cutoff_0.02_peak_21073	395.3	175	2.78e-46	2.26	0.442478	UP	promoter-TSS (NM_005642)	NM_005642	66	6879	NM_005642	TAF7	1.17632
chr6	34855651	34856172	1_NT1_cutoff_0.02_peak_21926	138.1	61	1.96e-17	2.26	0.442478	UP	promoter-TSS (NM_001270488)	NM_001270488	-64	6882	NM_005643	TAF11	1.17632
chr9	99616680	99616930	3_NTT1_cutoff_0.02_peak_18977	65.6	29	6.2e-09	2.26	0.442478	UP	promoter-TSS (NM_001346993)	NM_001346991	-35	158431	NM_001001662	ZNF782	1.17632
chr1	16302361	16302773	3_NTT1_cutoff_0.02_peak_145	126	56	6.71e-16	2.25	0.444444	UP	promoter-TSS (NM_001242884)	NM_003443	60	7709	NM_003443	ZBTB17	1.16993
chr1	28764349	28764874	1_NT1_cutoff_0.02_peak_582	173.5	77	4.05e-21	2.25	0.444444	UP	promoter-TSS (NM_023923)	NM_023923	-49	65979	NM_023923	PHACTR4	1.16993
chr1	32573457	32573846	3_NTT1_cutoff_0.02_peak_480	121.7	54	3.25e-15	2.25	0.444444	UP	promoter-TSS (NM_012316)	NM_012316	8	23633	NM_012316	KPNA6	1.16993
chr1	221915240	221915878	3_NTT1_cutoff_0.02_peak_2166	155.4	69	4.24e-19	2.25	0.444444	UP	promoter-TSS (NM_007207)	NM_007207	-41	11221	NM_007207	DUSP10	1.16993
chr11	64897139	64897887	3_NTT1_cutoff_0.02_peak_3678	81.1	36	8.14e-11	2.25	0.444444	UP	promoter-TSS (NR_106809)	NR_106809	-63	102465449	NR_106809	MIR6751	1.16993
chr11	89955729	89956508	1_NT1_cutoff_0.02_peak_5263	208.9	93	8.46e-25	2.25	0.444444	UP	exon (NM_001144073, exon 1 of 10)	NM_001144073	413	26973	NM_012124	CHORDC1	1.16993
chr16	24740814	24741232	1_NT1_cutoff_0.02_peak_9707	164	73	9.34e-20	2.25	0.444444	UP	promoter-TSS (NM_001330520)	NM_014494	31	27327	NM_014494	TNRC6A	1.16993
chr19	4456575	4457050	3_NTT1_cutoff_0.02_peak_9803	74.2	33	5.85e-10	2.25	0.444444	UP	intron (NM_025241, intron 1 of 10)	NM_025241	978	80700	NM_025241	UBXN6	1.16993
chr4	6711219	6711834	3_NTT1_cutoff_0.02_peak_14651	202.8	90	2.62e-24	2.25	0.444444	UP	promoter-TSS (NM_203462)	NM_203462	79	114932	NM_152301	MRFAP1L1	1.16993
chr4	57332777	57334301	1_NT1_cutoff_0.02_peak_19805	474.7	211	1.34e-54	2.25	0.444444	UP	promoter-TSS (NM_006947)	NR_151856	-223	6731	NM_006947	SRP72	1.16993
chr7	107531303	107532018	3_NTT1_cutoff_0.02_peak_17777	214	95	7.81e-26	2.25	0.444444	UP	5' UTR (NM_001289751, exon 1 of 13)	NM_001289752	109	1738	NM_000108	DLD	1.16993
chr8	126103774	126104286	1_NT1_cutoff_0.02_peak_24917	231.3	103	1.71e-27	2.25	0.444444	UP	promoter-TSS (NM_001349486)	NM_001330609	31	9897	NM_014846	WASHC5	1.16993
chr1	110527281	110527609	1_NT1_cutoff_0.02_peak_1483	105.3	47	2.38e-13	2.24	0.446429	UP	promoter-TSS (NM_001242673)	NM_006621	58	10768	NM_006621	AHCYL1	1.1635
chr14	99947756	99947929	1_NT1_cutoff_0.02_peak_8300	101	45	1.15e-12	2.24	0.446429	UP	promoter-TSS (NM_032233)	NM_001099402	104	8812	NM_003858	CCNK	1.1635
chr15	43398030	43398647	1_NT1_cutoff_0.02_peak_8613	199.4	89	8.61e-24	2.24	0.446429	UP	promoter-TSS (NM_174916)	NM_174916	-53	197131	NM_174916	UBR1	1.1635
chr17_ctg5_hap1	182823	183523	3_NTT1_cutoff_0.02_peak_9319	105.3	47	2.38e-13	2.24	0.446429	UP	promoter-TSS (NR_027782)	NR_027782	41	9842	NM_014798	PLEKHM1	1.1635
chr18	32869491	32869673	3_NTT1_cutoff_0.02_peak_9455	11.2	5	0.0137	2.24	0.446429	UP	promoter-TSS (NR_024565)	NM_001166012	627	100101467	NM_001112734	ZSCAN30	1.1635
chr18	43753774	43754185	1_NT1_cutoff_0.02_peak_12504	136.4	61	1.01e-16	2.24	0.446429	UP	promoter-TSS (NM_145055)	NM_145055	-8	147339	NM_145055	C18orf25	1.1635
chr19	5622577	5623740	1_NT1_cutoff_0.02_peak_13029	499.7	223	6.68e-57	2.24	0.446429	UP	promoter-TSS (NM_014649)	NM_001201338	113	6294	NM_002967	SAFB	1.1635
chr2	47399697	47401392	3_NTT1_cutoff_0.02_peak_11257	112.2	50	3.36e-14	2.24	0.446429	UP	5' UTR (NM_001305626, exon 1 of 5)	NM_001305626	801	805	NM_001743	CALM2	1.1635
chr2	61244208	61244475	3_NTT1_cutoff_0.02_peak_11307	67.3	30	4.22e-09	2.24	0.446429	UP	promoter-TSS (NM_001322124)	NM_001322124	5	150962	NM_144709	PUS10	1.1635
chr3	180319492	180320231	1_NT1_cutoff_0.02_peak_19253	272.7	122	1.18e-31	2.24	0.446429	UP	promoter-TSS (NM_001288582)	NM_133462	-56	151613	NM_133462	TTC14	1.1635
chrX	73834244	73834531	1_NT1_cutoff_0.02_peak_26691	89.8	40	1.76e-11	2.24	0.446429	UP	promoter-TSS (NM_016120)	NM_016120	73	51132	NM_016120	RLIM	1.1635
chr1	28099633	28099936	1_NT1_cutoff_0.02_peak_563	118.2	53	1.07e-14	2.23	0.44843	UP	promoter-TSS (NM_177424)	NM_177424	91	23673	NM_177424	STX12	1.15704
chr11	6624626	6625156	1_NT1_cutoff_0.02_peak_4309	184.7	83	9.4e-22	2.23	0.44843	UP	promoter-TSS (NM_004517)	NM_015324	-11	23378	NM_015324	RRP8	1.15704
chr11	62556390	62557342	1_NT1_cutoff_0.02_peak_4762	142.4	64	3.22e-17	2.23	0.44843	UP	promoter-TSS (NR_106806)	NR_106806	-421	102465448	NR_106806	MIR6748	1.15704
chr12	12966206	12966707	1_NT1_cutoff_0.02_peak_5772	95.8	43	5.57e-12	2.23	0.44843	UP	intron (NM_016355, intron 1 of 11)	NM_016355	177	51202	NM_016355	DDX47	1.15704
chr12	51477054	51477700	1_NT1_cutoff_0.02_peak_6034	464.3	208	1.05e-52	2.23	0.44843	UP	promoter-TSS (NM_030809)	NR_045072	60	81566	NM_030809	CSRNP2	1.15704
chr14	57735127	57736026	1_NT1_cutoff_0.02_peak_7992	229.6	103	8.63e-27	2.23	0.44843	UP	promoter-TSS (NR_026895)	NM_018229	-29	55745	NM_018229	AP5M1	1.15704
chr16	81069320	81069636	1_NT1_cutoff_0.02_peak_10250	125.1	56	1.52e-15	2.23	0.44843	UP	promoter-TSS (NM_015251)	NM_015251	20	23300	NM_015251	ATMIN	1.15704
chr19	4400338	4400716	3_NTT1_cutoff_0.02_peak_9792	163.1	73	9.34e-20	2.23	0.44843	UP	promoter-TSS (NM_001199944)	NM_003025	38	6455	NM_003025	SH3GL1	1.15704
chr5	31531565	31532618	1_NT1_cutoff_0.02_peak_20407	253.7	114	2.7e-29	2.23	0.44843	UP	promoter-TSS (NM_018356)	NM_013235	190	29102	NM_013235	DROSHA	1.15704
chr5	137878441	137878592	1_NT1_cutoff_0.02_peak_20985	69	31	2.87e-09	2.23	0.44843	UP	5' UTR (NM_001256302, exon 2 of 11)	NM_004730	472	2107	NM_004730	ETF1	1.15704
chr5	147763146	147763777	1_NT1_cutoff_0.02_peak_21120	449.7	202	1.12e-50	2.23	0.44843	UP	promoter-TSS (NM_001271723)	NM_030793	-36	81545	NM_030793	FBXO38	1.15704
chr8	22526402	22526772	1_NT1_cutoff_0.02_peak_24398	122.6	55	5e-15	2.23	0.44843	UP	promoter-TSS (NM_018688)	NM_018688	74	55909	NM_018688	BIN3	1.15704
chr1	161195788	161196131	1_NT1_cutoff_0.02_peak_2165	73.4	33	1.33e-09	2.22	0.45045	UP	intron (NM_001286374, intron 1 of 7)	NM_032174	231	84134	NM_032174	TOMM40L	1.15056
chr10	98345986	98347261	1_NT1_cutoff_0.02_peak_3711	622.3	280	2.43e-69	2.22	0.45045	UP	5' UTR (NM_020123, exon 1 of 15)	NM_020123	185	56889	NM_020123	TM9SF3	1.15056
chr10	124768093	124768669	1_NT1_cutoff_0.02_peak_4054	177.8	80	6.55e-21	2.22	0.45045	UP	promoter-TSS (NM_001330174)	NR_073475	-15	64376	NM_001271840	IKZF5	1.15056
chr11	3078409	3078829	3_NTT1_cutoff_0.02_peak_3242	139.8	63	1.05e-16	2.22	0.45045	UP	promoter-TSS (NR_036542)	NM_139273	62	833	NM_001751	CARS	1.15056
chr14	31494605	31496408	1_NT1_cutoff_0.02_peak_7836	436.7	197	8.1e-49	2.22	0.45045	UP	promoter-TSS (NM_001254728)	NM_001083893	100	29966	NM_014574	STRN3	1.15056
chr17	18218549	18218764	1_NT1_cutoff_0.02_peak_10833	97.5	44	3.79e-12	2.22	0.45045	UP	promoter-TSS (NM_144775)	NM_144775	63	140775	NM_144775	SMCR8	1.15056
chr17	42422551	42422858	3_NTT1_cutoff_0.02_peak_8701	82	37	2.82e-10	2.22	0.45045	UP	intron (NM_002087, intron 1 of 12)	NM_002087	251	2896	NM_002087	GRN	1.15056
chr18	19284519	19285006	3_NTT1_cutoff_0.02_peak_9430	166.6	75	9.79e-20	2.22	0.45045	UP	promoter-TSS (NM_001308256)	NM_001308256	3	171586	NM_138340	ABHD3	1.15056
chr19	57874462	57874735	1_NT1_cutoff_0.02_peak_14501	115.7	52	3.52e-14	2.22	0.45045	UP	promoter-TSS (NM_173631)	NM_173631	-204	284306	NM_173631	ZNF547	1.15056
chr2	38153126	38153311	3_NTT1_cutoff_0.02_peak_11176	15.5	7	0.00572	2.22	0.45045	UP	intron (NM_001322211, intron 1 of 10)	NM_001322211	545	151393	NM_144713	RMDN2	1.15056
chr22	20861772	20862323	1_NT1_cutoff_0.02_peak_17422	231.3	104	5.91e-27	2.22	0.45045	UP	promoter-TSS (NM_001293237)	NM_001003891	219	51586	NM_015889	MED15	1.15056
chr6	28109505	28110008	1_NT1_cutoff_0.02_peak_21816	162.3	73	2.1e-19	2.22	0.45045	UP	promoter-TSS (NM_006298)	NM_001278122	69	7745	NM_006298	ZKSCAN8	1.15056
chr6	149969430	149970084	1_NT1_cutoff_0.02_peak_22562	177.8	80	6.55e-21	2.22	0.45045	UP	5' UTR (NM_001204076, exon 1 of 8)	NM_001204076	183	11104	NM_007044	KATNA1	1.15056
chr7	102987804	102988217	1_NT1_cutoff_0.02_peak_23861	135.5	61	2.26e-16	2.22	0.45045	UP	promoter-TSS (NM_001204453)	NM_001204453	40	5701	NM_002803	PSMC2	1.15056
chr9	123963622	123964364	3_NTT1_cutoff_0.02_peak_19073	206.3	93	4.24e-24	2.22	0.45045	UP	5' UTR (NM_016322, exon 1 of 8)	NM_001353053	232	2934	NM_000177	GSN	1.15056
chr9	129567009	129567517	1_NT1_cutoff_0.02_peak_26000	206.3	93	4.24e-24	2.22	0.45045	UP	promoter-TSS (NM_014007)	NM_014007	-22	23099	NM_014007	ZBTB43	1.15056
chr10	35379034	35379430	3_NTT1_cutoff_0.02_peak_2653	110.5	50	1.69e-13	2.21	0.452489	UP	promoter-TSS (NM_001324375)	NM_003591	79	8453	NM_003591	CUL2	1.14405
chr14	24664495	24665362	1_NT1_cutoff_0.02_peak_7805	367.7	166	2.62e-41	2.21	0.452489	UP	promoter-TSS (NM_006405)	NM_006405	13	10548	NM_006405	TM9SF1	1.14405
chr16	3450777	3451237	3_NTT1_cutoff_0.02_peak_7221	188.2	85	4.4e-22	2.21	0.452489	UP	promoter-TSS (NM_001324341)	NM_001324345	58	54925	NM_017810	ZSCAN32	1.14405
chr16	30669449	30670318	3_NTT1_cutoff_0.02_peak_7500	205.4	93	9.43e-24	2.21	0.452489	UP	promoter-TSS (NM_001105079)	NM_001105079	-956	64319	NM_022452	FBRS	1.14405
chr18	54305528	54306339	1_NT1_cutoff_0.02_peak_12552	263.2	119	4.06e-30	2.21	0.452489	UP	promoter-TSS (NM_004786)	NR_024546	-14	9352	NM_004786	TXNL1	1.14405
chr18	55888608	55889041	1_NT1_cutoff_0.02_peak_12566	189.9	86	6.67e-22	2.21	0.452489	UP	promoter-TSS (NM_001144966)	NM_001144966	71	23327	NM_015277	NEDD4L	1.14405
chr19	40023276	40023584	1_NT1_cutoff_0.02_peak_13872	117.4	53	2.4e-14	2.21	0.452489	UP	promoter-TSS (NM_152361)	NM_152361	77	126272	NM_152361	EID2B	1.14405
chr2	206950271	206951124	3_NTT1_cutoff_0.02_peak_12041	218.4	99	4.34e-25	2.21	0.452489	UP	5' UTR (NM_017759, exon 1 of 11)	NM_017759	208	54891	NM_017759	INO80D	1.14405
chr20	61846874	61847717	3_NTT1_cutoff_0.02_peak_12774	185.6	84	1.43e-21	2.21	0.452489	UP	5' UTR (NM_017798, exon 1 of 5)	NM_017798	242	54915	NM_017798	YTHDF1	1.14405
chr4	177116793	177117092	1_NT1_cutoff_0.02_peak_20270	196.8	89	9.59e-23	2.21	0.452489	UP	promoter-TSS (NM_144644)	NM_144644	-121	132851	NM_144644	SPATA4	1.14405
chr10	75503378	75504375	3_NTT1_cutoff_0.02_peak_2847	363.4	165	1.88e-40	2.2	0.454545	UP	promoter-TSS (NM_004922)	NM_004922	-254	9632	NM_004922	SEC24C	1.1375
chr11	8008779	8009073	1_NT1_cutoff_0.02_peak_4323	103.6	47	1.19e-12	2.2	0.454545	UP	promoter-TSS (NM_003754)	NM_003754	59	8665	NM_003754	EIF3F	1.1375
chr11	45868906	45869186	1_NT1_cutoff_0.02_peak_4549	112.2	51	1.15e-13	2.2	0.454545	UP	promoter-TSS (NM_021117)	NM_021117	89	1408	NM_021117	CRY2	1.1375
chr13	40229628	40229969	3_NTT1_cutoff_0.02_peak_5314	92.4	42	1.83e-11	2.2	0.454545	UP	promoter-TSS (NR_026745)	NM_020751	35	57511	NM_020751	COG6	1.1375
chr19	7701745	7702207	1_NT1_cutoff_0.02_peak_13110	220.1	100	2.97e-25	2.2	0.454545	UP	promoter-TSS (NM_006949)	NR_073560	-11	6813	NM_006949	STXBP2	1.1375
chr19	36239343	36239652	1_NT1_cutoff_0.02_peak_13750	112.2	51	1.15e-13	2.2	0.454545	UP	5' UTR (NM_019104, exon 1 of 9)	NM_019104	236	55957	NM_019104	LIN37	1.1375
chr20	1447095	1447655	3_NTT1_cutoff_0.02_peak_12262	143.3	65	4.9e-17	2.2	0.454545	UP	exon (NM_001206736, exon 1 of 9)	NM_001206736	962	55968	NM_016143	NSFL1C	1.1375
chr3	48482092	48482363	3_NTT1_cutoff_0.02_peak_13699	48.3	22	1.1e-06	2.2	0.454545	UP	promoter-TSS (NM_024661)	NM_015933	580	51372	NM_015933	TMA7	1.1375
chr5	126366135	126366353	1_NT1_cutoff_0.02_peak_20824	103.6	47	1.19e-12	2.2	0.454545	UP	5' UTR (NM_178450, exon 1 of 5)	NM_178450	256	115123	NM_178450	MARCH3	1.1375
chr5	133303786	133304662	3_NTT1_cutoff_0.02_peak_15522	373.7	170	2.81e-41	2.2	0.454545	UP	promoter-TSS (NR_134247)	NR_134247	-156	105379183	NR_134247	LOC105379183	1.1375
chr7	19748465	19748819	1_NT1_cutoff_0.02_peak_23136	132.1	60	7.38e-16	2.2	0.454545	UP	promoter-TSS (NM_001002926)	NM_001002926	18	221830	NM_001002926	TWISTNB	1.1375
chr1	10092987	10093282	1_NT1_cutoff_0.02_peak_224	65.6	30	2.12e-08	2.19	0.456621	UP	promoter-TSS (NM_006048)	NM_001105562	94	10277	NM_006048	UBE4B	1.13093
chr1	249119916	249120202	1_NT1_cutoff_0.02_peak_2987	126.9	58	7.77e-15	2.19	0.456621	UP	promoter-TSS (NR_036070)	NM_030645	95	80851	NM_030645	SH3BP5L	1.13093
chr10	72972241	72972409	3_NTT1_cutoff_0.02_peak_2801	28.5	13	0.000204	2.19	0.456621	UP	promoter-TSS (NM_001244889)	NM_001244889	33	219699	NM_170744	UNC5B	1.13093
chr12	54718808	54719224	1_NT1_cutoff_0.02_peak_6214	238.2	109	9.59e-27	2.19	0.456621	UP	intron (NM_001271734, intron 1 of 7)	NM_001271736	142	22818	NM_016057	COPZ1	1.13093
chr15	65809378	65810119	1_NT1_cutoff_0.02_peak_8830	260.7	119	4.38e-29	2.19	0.456621	UP	promoter-TSS (NR_135486)	NM_197960	-73	54878	NM_017743	DPP8	1.13093
chr15	83735538	83736118	1_NT1_cutoff_0.02_peak_9026	236.5	108	1.41e-26	2.19	0.456621	UP	promoter-TSS (NR_039740)	NR_039740	-259	100616404	NR_039740	MIR4515	1.13093
chr16	2587951	2588197	1_NT1_cutoff_0.02_peak_9422	94.1	43	1.24e-11	2.19	0.456621	UP	5' UTR (NM_031268, exon 1 of 11)	NM_031268	109	5170	NM_002613	PDPK1	1.13093
chr17	25620927	25621941	3_NTT1_cutoff_0.02_peak_8274	258.1	118	6.41e-29	2.19	0.456621	UP	promoter-TSS (NR_039748)	NM_134265	387	26118	NM_015626	WSB1	1.13093
chr17	79849121	79850055	1_NT1_cutoff_0.02_peak_12180	315	144	6.25e-35	2.19	0.456621	UP	promoter-TSS (NM_001289418)	NM_001002244	-1	51529	NM_016476	ANAPC11	1.13093
chr19	3626600	3626889	1_NT1_cutoff_0.02_peak_12964	151	69	1.06e-17	2.19	0.456621	UP	promoter-TSS (NM_001080543)	NM_021231	68	58509	NM_021231	CACTIN	1.13093
chr19	55791314	55791581	3_NTT1_cutoff_0.02_peak_10866	85.4	39	1.3e-10	2.19	0.456621	UP	promoter-TSS (NM_001297600)	NM_001297600	-223	23640	NM_012267	HSPBP1	1.13093
chr2	27651065	27652050	3_NTT1_cutoff_0.02_peak_11125	286.5	131	9.35e-32	2.19	0.456621	UP	5' UTR (NM_001321362, exon 1 of 18)	NM_001321359	139	29959	NM_013392	NRBP1	1.13093
chr2	86333181	86334013	1_NT1_cutoff_0.02_peak_15239	227.9	104	1.42e-25	2.19	0.456621	UP	promoter-TSS (NM_015425)	NM_017952	292	55037	NM_017952	PTCD3	1.13093
chr20	442961	443433	1_NT1_cutoff_0.02_peak_16249	142.4	65	1.08e-16	2.19	0.456621	UP	promoter-TSS (NR_111901)	NR_111901	0	128637	NM_144628	TBC1D20	1.13093
chr3	49762325	49762558	3_NTT1_cutoff_0.02_peak_13761	32.8	15	9.03e-05	2.19	0.456621	UP	3' UTR (NM_001242829, exon 6 of 6)	NM_013334	-1035	29925	NM_013334	GMPPB	1.13093
chr5	32443978	32445049	1_NT1_cutoff_0.02_peak_20414	310.7	142	2.94e-34	2.19	0.456621	UP	intron (NR_144318, intron 1 of 18)	NM_016107	353	51663	NM_016107	ZFR	1.13093
chr6	160205629	160206678	3_NTT1_cutoff_0.02_peak_16917	89.8	41	5.95e-11	2.19	0.456621	UP	TTS (NR_002965)	NR_002965	611	677812	NR_002965	SNORA29	1.13093
chr6_cox_hap2	77165	77458	3_NTT1_cutoff_0.02_peak_16962	76.8	35	1.36e-09	2.19	0.456621	UP	promoter-TSS (NM_052923).2	NM_052923	4	114821	NM_052923	ZBED9	1.13093
chr7	6865642	6866162	3_NTT1_cutoff_0.02_peak_17137	240.8	110	6.55e-27	2.19	0.456621	UP	promoter-TSS (NM_198097)	NM_198097	24	221960	NM_198097	CCZ1B	1.13093
chr7	44058353	44058943	3_NTT1_cutoff_0.02_peak_17281	183.8	84	6.96e-21	2.19	0.456621	UP	intron (NR_003655, intron 1 of 15)	NR_003655	145	84820	NM_032734	POLR2J4	1.13093
chr8	95565592	95566202	1_NT1_cutoff_0.02_peak_24709	182.1	83	4.63e-21	2.19	0.456621	UP	promoter-TSS (NM_015496)	NM_183009	-151	25962	NM_015496	VIRMA	1.13093
chrX	16737265	16738081	1_NT1_cutoff_0.02_peak_26402	275.3	126	1.38e-30	2.19	0.456621	UP	promoter-TSS (NR_033181)	NM_032796	-34	94056	NM_032796	SYAP1	1.13093
chr1	24306397	24307067	1_NT1_cutoff_0.02_peak_447	185.6	85	4.74e-21	2.18	0.458716	UP	exon (NM_001191007, exon 1 of 6)	NM_001191009	221	10772	NM_006625	SRSF10	1.12433
chr1	36851221	36851757	3_NTT1_cutoff_0.02_peak_565	157.1	72	3.35e-18	2.18	0.458716	UP	promoter-TSS (NM_032017)	NM_032017	39	83931	NM_032017	STK40	1.12433
chr1	44412496	44412834	1_NT1_cutoff_0.02_peak_970	124.3	57	1.14e-14	2.18	0.458716	UP	5' UTR (NM_014652, exon 1 of 20)	NM_014652	187	9670	NM_014652	IPO13	1.12433
chr1	151226931	151227599	1_NT1_cutoff_0.02_peak_1741	399.6	183	2.01e-43	2.18	0.458716	UP	promoter-TSS (NM_002810)	NM_002810	68	5710	NM_002810	PSMD4	1.12433
chr1	156084338	156084818	3_NTT1_cutoff_0.02_peak_1609	265.8	122	3.05e-29	2.18	0.458716	UP	5' UTR (NM_001282626, exon 1 of 12)	NM_005572	117	4000	NM_005572	LMNA	1.12433
chr1	200378919	200379320	3_NTT1_cutoff_0.02_peak_1978	202.8	93	1.01e-22	2.18	0.458716	UP	promoter-TSS (NM_001281294)	NM_012482	66	23528	NM_012482	ZNF281	1.12433
chr1	203274288	203274898	3_NTT1_cutoff_0.02_peak_2012	338.3	155	4.32e-37	2.18	0.458716	UP	promoter-TSS (NR_034150)	NM_006763	-71	7832	NM_006763	BTG2	1.12433
chr11	85339218	85339878	1_NT1_cutoff_0.02_peak_5238	132.9	61	2.44e-15	2.18	0.458716	UP	promoter-TSS (NM_001350393)	NM_001350396	-69	55863	NM_018480	TMEM126B	1.12433
chr11	118271822	118272662	1_NT1_cutoff_0.02_peak_5385	258.9	119	2.09e-28	2.18	0.458716	UP	non-coding (NR_033759, exon 1 of 4)	NM_006476	138	10632	NM_006476	ATP5MG	1.12433
chr12	120884044	120884462	1_NT1_cutoff_0.02_peak_6943	244.3	112	3.05e-27	2.18	0.458716	UP	promoter-TSS (NM_176818)	NM_176818	12	283459	NM_176818	GATC	1.12433
chr14	53173502	53174104	1_NT1_cutoff_0.02_peak_7955	318.5	146	6.39e-35	2.18	0.458716	UP	promoter-TSS (NM_002806)	NM_002806	-93	5706	NM_002806	PSMC6	1.12433
chr16	53242309	53242522	3_NTT1_cutoff_0.02_peak_7593	37.1	17	1.8e-05	2.18	0.458716	UP	promoter-TSS (NM_001352158)	NM_001352158	48	80205	NM_015287	CHD9	1.12433
chr16	67840257	67840539	3_NTT1_cutoff_0.02_peak_7661	100.1	46	3.88e-12	2.18	0.458716	UP	promoter-TSS (NM_001288994)	NM_020850	157	57610	NM_020850	RANBP10	1.12433
chr17	78120756	78121322	1_NT1_cutoff_0.02_peak_12084	450.5	207	2.06e-48	2.18	0.458716	UP	promoter-TSS (NM_014740)	NM_014740	-57	9775	NM_014740	EIF4A3	1.12433
chr18	61089227	61090353	3_NTT1_cutoff_0.02_peak_9547	396.2	182	6.42e-43	2.18	0.458716	UP	promoter-TSS (NM_004869)	NM_004869	-38	9525	NM_004869	VPS4B	1.12433
chr19	37568982	37569255	3_NTT1_cutoff_0.02_peak_10385	82.9	38	4.21e-10	2.18	0.458716	UP	promoter-TSS (NM_001329516)	NM_001329517	-5	147923	NM_144689	ZNF420	1.12433
chr19	44100011	44100331	1_NT1_cutoff_0.02_peak_13991	128.6	59	5.28e-15	2.18	0.458716	UP	promoter-TSS (NM_024327)	NM_001007561	116	126298	NM_001007561	IRGQ	1.12433
chr19	58978168	58978627	3_NTT1_cutoff_0.02_peak_10966	152.8	70	1.59e-17	2.18	0.458716	UP	promoter-TSS (NM_014347)	NM_014347	-14	25799	NM_014347	ZNF324	1.12433
chr2	26467695	26468115	1_NT1_cutoff_0.02_peak_14747	185.6	85	4.74e-21	2.18	0.458716	UP	promoter-TSS (NM_000182)	NM_001281512	289	3032	NM_000183	HADHB	1.12433
chr22	19131991	19132261	1_NT1_cutoff_0.02_peak_17369	95.8	44	1.85e-11	2.18	0.458716	UP	promoter-TSS (NM_022719)	NR_134304	64	8220	NM_022719	ESS2	1.12433
chr3	128968154	128968717	1_NT1_cutoff_0.02_peak_18895	246.8	113	2.08e-27	2.18	0.458716	UP	promoter-TSS (NM_016128)	NM_016128	-17	22820	NM_016128	COPG1	1.12433
chr6	116600645	116601330	1_NT1_cutoff_0.02_peak_22424	214	98	3.09e-24	2.18	0.458716	UP	promoter-TSS (NM_001080976)	NR_136522	-238	29940	NM_013352	DSE	1.12433
chr6	136611698	136611990	1_NT1_cutoff_0.02_peak_22498	50.1	23	7.41e-07	2.18	0.458716	UP	promoter-TSS (NM_001301038)	NM_014739	-855	9774	NM_014739	BCLAF1	1.12433
chr6	170615538	170616312	3_NTT1_cutoff_0.02_peak_16939	302.9	139	4.41e-33	2.18	0.458716	UP	5' UTR (NM_032448, exon 1 of 11)	NM_032448	115	84498	NM_032448	FAM120B	1.12433
chr7	10979411	10979957	1_NT1_cutoff_0.02_peak_23121	246	113	4.54e-27	2.18	0.458716	UP	exon (NM_002489, exon 1 of 4)	NM_002489	129	4697	NM_002489	NDUFA4	1.12433
chr9	35731690	35733020	1_NT1_cutoff_0.02_peak_25517	395.3	181	4.3e-43	2.18	0.458716	UP	promoter-TSS (NM_006289)	NM_006289	37	7094	NM_006289	TLN1	1.12433
chr1	162467378	162468000	1_NT1_cutoff_0.02_peak_2179	271	125	9.67e-30	2.17	0.460829	UP	promoter-TSS (NM_175866)	NM_144624	94	127933	NM_144624	UHMK1	1.1177
chr1	172413061	172413373	3_NTT1_cutoff_0.02_peak_1783	156.2	72	7.34e-18	2.17	0.460829	UP	promoter-TSS (NM_002642)	NM_153747	13	5279	NM_002642	PIGC	1.1177
chr10	115933876	115934074	1_NT1_cutoff_0.02_peak_3974	80.3	37	6.22e-10	2.17	0.460829	UP	promoter-TSS (NR_135815)	NR_135815	4	55088	NM_018017	CCDC186	1.1177
chr10	126490125	126490568	1_NT1_cutoff_0.02_peak_4065	139	64	7.65e-16	2.17	0.460829	UP	promoter-TSS (NM_032182)	NM_032182	-7	23172	NM_032182	ABRAXAS2	1.1177
chr15	74988193	74988561	1_NT1_cutoff_0.02_peak_8926	151.9	70	3.46e-17	2.17	0.460829	UP	promoter-TSS (NM_001351378)	NM_001351379	17	80153	NM_025083	EDC3	1.1177
chr2	170440790	170441579	3_NTT1_cutoff_0.02_peak_11770	243.4	112	6.66e-27	2.17	0.460829	UP	intron (NM_004792, intron 1 of 13)	NM_004792	335	9360	NM_004792	PPIG	1.1177
chr20	1098879	1099498	1_NT1_cutoff_0.02_peak_16255	245.1	113	4.54e-27	2.17	0.460829	UP	promoter-TSS (NM_001323408)	NM_001323410	-47	9491	NM_006814	PSMF1	1.1177
chr22	26908264	26908751	1_NT1_cutoff_0.02_peak_17486	236.5	109	4.59e-26	2.17	0.460829	UP	promoter-TSS (NM_001346862)	NR_144529	10	100507599	NR_144529	LOC100507599	1.1177
chr3	14692834	14693474	3_NTT1_cutoff_0.02_peak_13540	242.5	112	1.45e-26	2.17	0.460829	UP	promoter-TSS (NM_016474)	NM_016474	-99	51244	NM_016474	CCDC174	1.1177
chr3	25705592	25705938	3_NTT1_cutoff_0.02_peak_13575	58.7	27	1.52e-07	2.17	0.460829	UP	promoter-TSS (NM_001068)	NM_001068	98	7155	NM_001068	TOP2B	1.1177
chr3	47324239	47324658	3_NTT1_cutoff_0.02_peak_13678	119.1	55	5.43e-14	2.17	0.460829	UP	promoter-TSS (NM_022342)	NM_022342	-112	64147	NM_022342	KIF9	1.1177
chr7	76178332	76178898	1_NT1_cutoff_0.02_peak_23614	190.7	88	3.27e-21	2.17	0.460829	UP	promoter-TSS (NR_029411)	NR_029411	-43	100133091	NR_029411	LOC100133091	1.1177
chr7	99716778	99717063	1_NT1_cutoff_0.02_peak_23745	97.5	45	1.26e-11	2.17	0.460829	UP	promoter-TSS (NM_152755)	NM_005641	74	6878	NM_005641	TAF6	1.1177
chr7	132766654	132766955	1_NT1_cutoff_0.02_peak_24093	76	35	2.98e-09	2.17	0.460829	UP	non-coding (NR_133671, exon 1 of 11)	NM_017812	113	54927	NM_017812	CHCHD3	1.1177
chr9	4679173	4679867	1_NT1_cutoff_0.02_peak_25329	302.1	139	4.41e-33	2.17	0.460829	UP	promoter-TSS (NR_121597)	NM_017913	-33	55664	NM_017913	CDC37L1	1.1177
chr9	33076490	33076927	3_NTT1_cutoff_0.02_peak_18744	177.8	82	7.16e-20	2.17	0.460829	UP	promoter-TSS (NM_018225)	NM_018225	5	55234	NM_018225	SMU1	1.1177
chr9	104160603	104161347	1_NT1_cutoff_0.02_peak_25855	240.8	111	2.13e-26	2.17	0.460829	UP	promoter-TSS (NM_001278232)	NM_019051	-56	54534	NM_019051	MRPL50	1.1177
chr1	22778281	22778575	1_NT1_cutoff_0.02_peak_399	64.7	30	4.65e-08	2.16	0.462963	UP	promoter-TSS (NM_014870)	NM_001330398	84	9923	NM_014870	ZBTB40	1.11103
chr1	149815155	149815708	3_NTT1_cutoff_0.02_peak_1341	90.6	42	8.82e-11	2.16	0.462963	UP	Intergenic	NM_001040874	-1114	723790	NM_001040874	HIST2H2AA4	1.11103
chr1	150601418	150602440	1_NT1_cutoff_0.02_peak_1701	403.1	187	9.75e-43	2.16	0.462963	UP	promoter-TSS (NM_207047)	NM_207042	169	2029	NM_004436	ENSA	1.11103
chr1	179112029	179112325	1_NT1_cutoff_0.02_peak_2298	103.6	48	3.91e-12	2.16	0.462963	UP	promoter-TSS (NM_001168239)	NM_001168239	47	27	NM_005158	ABL2	1.11103
chr14	61201360	61201679	1_NT1_cutoff_0.02_peak_8029	90.6	42	8.82e-11	2.16	0.462963	UP	promoter-TSS (NM_002431)	NM_001177963	61	4331	NM_002431	MNAT1	1.11103
chr14	74353071	74354071	1_NT1_cutoff_0.02_peak_8156	268.4	124	3.08e-29	2.16	0.462963	UP	non-coding (NR_040251, exon 1 of 12)	NM_001242926	253	57862	NM_021188	ZNF410	1.11103
chr16	8956353	8956935	3_NTT1_cutoff_0.02_peak_7271	60.4	28	1.03e-07	2.16	0.462963	UP	promoter-TSS (NM_001278266)	NM_001278265	-977	23589	NM_014316	CARHSP1	1.11103
chr16	48277979	48278415	3_NTT1_cutoff_0.02_peak_7581	188.2	87	4.8e-21	2.16	0.462963	UP	5' UTR (NM_031490, exon 1 of 15)	NM_001300948	119	83752	NM_031490	LONP2	1.11103
chr17	1359142	1359927	1_NT1_cutoff_0.02_peak_10440	270.1	125	2.1e-29	2.16	0.462963	UP	promoter-TSS (NM_016823)	NM_005206	26	1398	NM_005206	CRK	1.11103
chr17	58755200	58755382	1_NT1_cutoff_0.02_peak_11741	43.2	20	5.43e-06	2.16	0.462963	UP	intron (NM_001099432, intron 1 of 24)	NM_001353145	155	54828	NM_017679	BCAS3	1.11103
chr17	62207267	62207730	3_NTT1_cutoff_0.02_peak_8964	265.8	123	9.82e-29	2.16	0.462963	UP	promoter-TSS (NM_001433)	NM_001433	3	2081	NM_001433	ERN1	1.11103
chr2	26467322	26467577	1_NT1_cutoff_0.02_peak_14746	86.3	40	1.93e-10	2.16	0.462963	UP	promoter-TSS (NM_001281513)	NM_000182	144	3030	NM_000182	HADHA	1.11103
chr2	44001501	44001679	3_NTT1_cutoff_0.02_peak_11202	21.6	10	0.00159	2.16	0.462963	UP	intron (NM_001348913, intron 1 of 13)	NM_001348913	412	51626	NM_015522	DYNC2LI1	1.11103
chr2	172778623	172779170	1_NT1_cutoff_0.02_peak_15643	136.4	63	1.13e-15	2.16	0.462963	UP	promoter-TSS (NR_027862)	NM_003642	-38	8520	NM_003642	HAT1	1.11103
chr2	177133950	177134428	3_NTT1_cutoff_0.02_peak_11806	233	108	1.46e-25	2.16	0.462963	UP	promoter-TSS (NM_006554)	NM_006554	66	10651	NM_006554	MTX2	1.11103
chr20	62339060	62339640	3_NTT1_cutoff_0.02_peak_12803	297.8	138	6.63e-32	2.16	0.462963	UP	promoter-TSS (NM_001267544)	NR_051956	15	10139	NM_003224	ARFRP1	1.11103
chr22	21271452	21271980	1_NT1_cutoff_0.02_peak_17427	151	70	3.46e-17	2.16	0.462963	UP	promoter-TSS (NM_005207)	NM_005207	2	1399	NM_005207	CRKL	1.11103
chr22	22652399	22652710	3_NTT1_cutoff_0.02_peak_13044	82	38	9.18e-10	2.16	0.462963	UP	promoter-TSS (NR_027293)	NR_027293	92	96610	NM_080926	BMS1P20	1.11103
chr3	12586904	12587094	3_NTT1_cutoff_0.02_peak_13510	25.9	12	0.000686	2.16	0.462963	UP	promoter-TSS (NM_001195279)	NM_001195279	-36	100129480	NM_001195279	MKRN2OS	1.11103
chr3	64008795	64009383	1_NT1_cutoff_0.02_peak_18646	188.2	87	4.8e-21	2.16	0.462963	UP	promoter-TSS (NM_001271781)	NM_001271781	59	9861	NM_014814	PSMD6	1.11103
chr5	133512018	133512212	3_NTT1_cutoff_0.02_peak_15529	64.7	30	4.65e-08	2.16	0.462963	UP	intron (NM_006930, intron 1 of 4)	NM_170679	609	6500	NM_006930	SKP1	1.11103
chr5	154320393	154320857	1_NT1_cutoff_0.02_peak_21245	297.8	138	6.63e-32	2.16	0.462963	UP	promoter-TSS (NM_014180)	NM_014180	-8	29093	NM_014180	MRPL22	1.11103
chr5	176778402	176779011	3_NTT1_cutoff_0.02_peak_15998	285.7	132	6.62e-31	2.16	0.462963	UP	5' UTR (NM_006816, exon 1 of 8)	NM_006816	178	10960	NM_006816	LMAN2	1.11103
chr6	83777219	83777672	3_NTT1_cutoff_0.02_peak_16641	90.6	42	8.82e-11	2.16	0.462963	UP	promoter-TSS (NM_015018)	NM_015018	61	23033	NM_015018	DOPEY1	1.11103
chr8	144623401	144624263	1_NT1_cutoff_0.02_peak_25090	493.7	229	1.01e-51	2.16	0.462963	UP	promoter-TSS (NM_015117)	NM_015117	-212	23144	NM_015117	ZC3H3	1.11103
chr9	88969143	88969755	1_NT1_cutoff_0.02_peak_25700	261.5	121	2.12e-28	2.16	0.462963	UP	promoter-TSS (NM_024617)	NM_001185059	-47	79670	NM_024617	TUT7	1.11103
chrX	129535715	129536149	3_NTT1_cutoff_0.02_peak_19744	157.9	73	1.09e-17	2.16	0.462963	UP	promoter-TSS (NM_016024)	NM_016024	9	51634	NM_016024	RBMX2	1.11103
chr1	1655615	1656256	3_NTT1_cutoff_0.02_peak_48	313.3	146	3.08e-33	2.15	0.465116	UP	promoter-TSS (NM_033490)	NR_132739	68	728642	NM_024011	CDK11A	1.10434
chr1	151138260	151138776	1_NT1_cutoff_0.02_peak_1735	227.9	106	1.48e-24	2.15	0.465116	UP	promoter-TSS (NR_037937)	NR_037937	20	79005	NM_024041	SCNM1	1.10434
chr11	43333433	43333984	1_NT1_cutoff_0.02_peak_4533	191.6	89	4.82e-21	2.15	0.465116	UP	non-coding (NR_024625, exon 1 of 15)	NR_024625	204	8539	NM_006595	API5	1.10434
chr19	11039093	11039729	1_NT1_cutoff_0.02_peak_13218	232.2	108	3.17e-25	2.15	0.465116	UP	promoter-TSS (NM_138358)	NM_138358	-1	90580	NM_138358	TIMM29	1.10434
chr2	71357587	71357992	1_NT1_cutoff_0.02_peak_15134	126.9	59	2.5e-14	2.15	0.465116	UP	promoter-TSS (NM_032601)	NM_005791	346	10199	NM_005791	MPHOSPH10	1.10434
chr2	99224653	99225685	3_NTT1_cutoff_0.02_peak_11545	520.4	242	3.23e-54	2.15	0.465116	UP	promoter-TSS (NM_001008215)	NM_001330353	158	25972	NM_014044	UNC50	1.10434
chr3	38178391	38178736	3_NTT1_cutoff_0.02_peak_13607	75.1	35	2.98e-09	2.15	0.465116	UP	non-coding (NR_024024, exon 1 of 10)	NM_001130410	169	30	NM_001607	ACAA1	1.10434
chr3	41240668	41241409	3_NTT1_cutoff_0.02_peak_13647	473	220	3.16e-49	2.15	0.465116	UP	promoter-TSS (NM_001904)	NM_001904	97	1499	NM_001904	CTNNB1	1.10434
chr11	64888810	64890036	1_NT1_cutoff_0.02_peak_4871	482.5	225	4.66e-50	2.14	0.46729	UP	promoter-TSS (NM_004927)	NR_037567	-232	740	NM_004927	MRPL49	1.09761
chr12	117175677	117175977	3_NTT1_cutoff_0.02_peak_4975	94.1	44	4.04e-11	2.14	0.46729	UP	promoter-TSS (NM_024738)	NM_001353624	78	79794	NM_024738	C12orf49	1.09761
chr18	32923721	32924538	1_NT1_cutoff_0.02_peak_12477	295.2	138	3.08e-31	2.14	0.46729	UP	intron (NM_001308123, intron 1 of 3)	NM_001308123	301	7572	NM_006965	ZNF24	1.09761
chr19	12098306	12098646	3_NTT1_cutoff_0.02_peak_10029	53.5	25	7.36e-07	2.14	0.46729	UP	promoter-TSS (NR_134930)	NR_134929	44	101928464	NR_134927	ZNF433-AS1	1.09761
chr2	37458512	37459040	1_NT1_cutoff_0.02_peak_14901	179.5	84	1.54e-19	2.14	0.46729	UP	promoter-TSS (NR_146410)	NR_146402	2	55471	NM_018607	NDUFAF7	1.09761
chr5	65439663	65440840	1_NT1_cutoff_0.02_peak_20568	475.6	222	3.16e-49	2.14	0.46729	UP	promoter-TSS (NM_139168)	NM_001323535	206	140890	NM_139168	SREK1	1.09761
chr6	28192766	28193214	1_NT1_cutoff_0.02_peak_21819	132.9	62	7.78e-15	2.14	0.46729	UP	promoter-TSS (NM_006299)	NM_001199479	-39	7746	NM_006299	ZSCAN9	1.09761
chr6	116891979	116892869	1_NT1_cutoff_0.02_peak_22428	335.7	157	4.48e-35	2.14	0.46729	UP	promoter-TSS (NM_016104)	NM_001007464	-106	51389	NM_015952	RWDD1	1.09761
chr6	159065437	159065922	3_NTT1_cutoff_0.02_peak_16890	128.6	60	1.69e-14	2.14	0.46729	UP	intron (NM_006519, intron 1 of 4)	NM_001291602	138	6993	NM_006519	DYNLT1	1.09761
chr9	33001142	33001920	1_NT1_cutoff_0.02_peak_25399	201.1	94	7e-22	2.14	0.46729	UP	promoter-TSS (NM_001195249)	NR_036579	43	54840	NM_017692	APTX	1.09761
chr9	86322139	86323812	1_NT1_cutoff_0.02_peak_25669	461.8	216	1.45e-47	2.14	0.46729	UP	promoter-TSS (NR_135840)	NM_053067	192	29979	NM_013438	UBQLN1	1.09761
chr9	131314608	131315596	3_NTT1_cutoff_0.02_peak_19155	567.9	266	7.03e-58	2.14	0.46729	UP	intron (NM_001130438, intron 1 of 56)	NM_001130438	265	6709	NM_003127	SPTAN1	1.09761
chr11	6502304	6503006	1_NT1_cutoff_0.02_peak_4304	284.8	134	1.41e-29	2.13	0.469484	UP	promoter-TSS (NM_012192)	NM_012192	-22	26515	NM_012192	TIMM10B	1.09085
chr12	19592288	19592733	3_NTT1_cutoff_0.02_peak_4330	114.8	54	8.09e-13	2.13	0.469484	UP	promoter-TSS (NM_153207)	NM_153207	-97	121536	NM_153207	AEBP2	1.09085
chr12	42719636	42720197	1_NT1_cutoff_0.02_peak_5929	194.2	91	4.8e-21	2.13	0.469484	UP	promoter-TSS (NM_201515)	NM_033114	15	85437	NM_033114	ZCRB1	1.09085
chr15	25683894	25684561	1_NT1_cutoff_0.02_peak_8474	227.9	107	4.61e-24	2.13	0.469484	UP	promoter-TSS (NM_001354548)	NM_001354539	-25	7337	NM_000462	UBE3A	1.09085
chr15	72765990	72766999	1_NT1_cutoff_0.02_peak_8905	529.1	248	3.21e-54	2.13	0.469484	UP	promoter-TSS (NM_005744)	NR_135678	85	105370888	NR_135678	TMEM202-AS1	1.09085
chr19	12777396	12777681	1_NT1_cutoff_0.02_peak_13298	117.4	55	2.55e-13	2.13	0.469484	UP	promoter-TSS (NM_001173498)	NM_001173498	52	4125	NM_000528	MAN2B1	1.09085
chr19	15529511	15530304	1_NT1_cutoff_0.02_peak_13460	437.6	205	4.53e-45	2.13	0.469484	UP	promoter-TSS (NR_111971)	NM_001291478	24	26993	NM_014371	AKAP8L	1.09085
chr19	53237971	53238465	1_NT1_cutoff_0.02_peak_14379	157.9	74	3.42e-17	2.13	0.469484	UP	promoter-TSS (NM_001161500)	NM_001161501	79	81856	NM_030972	ZNF611	1.09085
chr2	32502767	32503193	1_NT1_cutoff_0.02_peak_14871	127.7	60	3.64e-14	2.13	0.469484	UP	promoter-TSS (NM_032312)	NM_032312	22	84272	NM_032312	YIPF4	1.09085
chr20	44509811	44510035	3_NTT1_cutoff_0.02_peak_12606	72.5	34	9.58e-09	2.13	0.469484	UP	promoter-TSS (NM_080603)	NM_080603	75	90204	NM_080603	ZSWIM1	1.09085
chr6	88299433	88300029	1_NT1_cutoff_0.02_peak_22315	155.4	73	5.05e-17	2.13	0.469484	UP	promoter-TSS (NR_146749)	NR_146752	19	57038	NM_020320	RARS2	1.09085
chr7	44104717	44104928	1_NT1_cutoff_0.02_peak_23306	36.2	17	4e-05	2.13	0.469484	UP	exon (NM_000290, exon 1 of 3)	NM_000290	363	5224	NM_000290	PGAM2	1.09085
chr7	102119155	102119442	1_NT1_cutoff_0.02_peak_23844	149.3	70	1.62e-16	2.13	0.469484	UP	promoter-TSS (NM_006234)	NM_006234	82	5439	NM_006234	POLR2J	1.09085
chr9	139760542	139761116	1_NT1_cutoff_0.02_peak_26286	233.9	110	1.45e-24	2.13	0.469484	UP	promoter-TSS (NM_001281298)	NM_001281298	-41	8721	NM_003792	EDF1	1.09085
chr1	35734197	35734880	3_NTT1_cutoff_0.02_peak_547	216.6	102	6.81e-23	2.12	0.471698	UP	promoter-TSS (NM_001350139)	NM_001350139	-29	9202	NM_005095	ZMYM4	1.08406
chr1	150669390	150669742	1_NT1_cutoff_0.02_peak_1702	88.9	42	4.08e-10	2.12	0.471698	UP	TTS (NM_032132)	NM_018178	106	55204	NM_018178	GOLPH3L	1.08406
chr1	155532342	155533496	1_NT1_cutoff_0.02_peak_1949	584.3	276	1.45e-58	2.12	0.471698	UP	promoter-TSS (NM_018489)	NM_018489	-595	55870	NM_018489	ASH1L	1.08406
chr1	224180067	224180953	1_NT1_cutoff_0.02_peak_2717	468.7	221	2.06e-47	2.12	0.471698	UP	promoter-TSS (NR_132119)	NR_136590	78	100287497	NR_136590	LOC100287497	1.08406
chr10	101418847	101419446	3_NTT1_cutoff_0.02_peak_3004	144.1	68	7.54e-16	2.12	0.471698	UP	promoter-TSS (NM_020354)	NM_020354	13	57089	NM_020354	ENTPD7	1.08406
chr11	45939215	45939782	3_NTT1_cutoff_0.02_peak_3449	221	104	3.14e-23	2.12	0.471698	UP	5' UTR (NM_004813, exon 1 of 11)	NM_057174	175	9409	NM_004813	PEX16	1.08406
chr11	61196721	61197875	3_NTT1_cutoff_0.02_peak_3537	449.7	212	1.39e-45	2.12	0.471698	UP	promoter-TSS (NM_017841)	NM_024811	85	79869	NM_024811	CPSF7	1.08406
chr12	62653570	62654367	1_NT1_cutoff_0.02_peak_6413	258.1	122	6.56e-27	2.12	0.471698	UP	promoter-TSS (NM_006313)	NM_001351159	-152	9958	NM_006313	USP15	1.08406
chr15	82798165	82798330	1_NT1_cutoff_0.02_peak_9008	23.3	11	0.00104	2.12	0.471698	UP	non-coding (NR_026811, exon 1 of 8)	NR_103496	151	80154	NM_025084	GOLGA2P10	1.08406
chr15	86337994	86338257	3_NTT1_cutoff_0.02_peak_6852	46.6	22	5.3e-06	2.12	0.471698	UP	promoter-TSS (NM_022480)	NM_022480	63	64410	NM_022480	KLHL25	1.08406
chr17	71188892	71189883	3_NTT1_cutoff_0.02_peak_9030	163.1	77	1.07e-17	2.12	0.471698	UP	exon (NM_018714, exon 1 of 14)	NM_018714	215	9382	NM_018714	COG1	1.08406
chr19	11466056	11466245	1_NT1_cutoff_0.02_peak_13274	46.6	22	5.3e-06	2.12	0.471698	UP	promoter-TSS (NM_001170635)	NM_022737	89	64748	NM_022737	PLPPR2	1.08406
chr2	220109791	220110563	3_NTT1_cutoff_0.02_peak_12113	304.7	144	2.96e-31	2.12	0.471698	UP	promoter-TSS (NM_001330213)	NM_001330215	0	8576	NM_003691	STK16	1.08406
chr22	32808029	32808360	1_NT1_cutoff_0.02_peak_17632	78.5	37	2.93e-09	2.12	0.471698	UP	promoter-TSS (NM_014306)	NM_014306	79	51493	NM_014306	RTCB	1.08406
chr4	3533947	3534259	1_NT1_cutoff_0.02_peak_19584	203.7	96	1.48e-21	2.12	0.471698	UP	promoter-TSS (NR_110005)	NM_002337	121	4043	NM_002337	LRPAP1	1.08406
chr5	115910331	115910500	3_NTT1_cutoff_0.02_peak_15450	23.3	11	0.00104	2.12	0.471698	UP	5' UTR (NM_001300780, exon 1 of 20)	NM_001300780	206	57556	NM_020681	SEMA6A	1.08406
chr6	135375772	135376321	1_NT1_cutoff_0.02_peak_22492	221	104	3.14e-23	2.12	0.471698	UP	promoter-TSS (NM_006620)	NM_001145158	-11	10767	NM_006620	HBS1L	1.08406
chr7	97501489	97501910	3_NTT1_cutoff_0.02_peak_17548	101.8	48	1.81e-11	2.12	0.471698	UP	promoter-TSS (NM_001178077)	NM_183356	154	440	NM_001673	ASNS	1.08406
chr7	129592568	129592889	1_NT1_cutoff_0.02_peak_24021	106.2	50	3.87e-12	2.12	0.471698	UP	promoter-TSS (NM_003344)	NM_001202498	54	7328	NM_003344	UBE2H	1.08406
chr8	146175725	146176442	3_NTT1_cutoff_0.02_peak_18657	263.2	124	1.42e-27	2.12	0.471698	UP	intron (NM_001029976, intron 1 of 3)	NM_006958	190	7564	NM_006958	ZNF16	1.08406
chr9	6008282	6008865	3_NTT1_cutoff_0.02_peak_18677	148.5	70	3.46e-16	2.12	0.471698	UP	promoter-TSS (NM_001017969)	NM_001017969	-571	158358	NM_001017969	KIAA2026	1.08406
chr1	39456624	39457382	3_NTT1_cutoff_0.02_peak_611	253.7	120	3.02e-26	2.11	0.473934	UP	promoter-TSS (NM_024595)	NM_001136275	87	79647	NM_024595	AKIRIN1	1.07724
chr1	109618270	109618898	1_NT1_cutoff_0.02_peak_1459	248.6	118	1.39e-25	2.11	0.473934	UP	promoter-TSS (NM_005645)	NM_005645	40	6884	NM_005645	TAF13	1.07724
chr12	95867533	95868629	1_NT1_cutoff_0.02_peak_6710	394.4	187	9.12e-40	2.11	0.473934	UP	non-coding (NR_133673, exon 1 of 10)	NM_006838	259	10988	NM_006838	METAP2	1.07724
chr14	53019055	53019319	1_NT1_cutoff_0.02_peak_7953	99.3	47	2.68e-11	2.11	0.473934	UP	promoter-TSS (NM_001099652)	NM_020784	114	57544	NM_020784	TXNDC16	1.07724
chr14	104387472	104387990	1_NT1_cutoff_0.02_peak_8390	166.6	79	1.04e-17	2.11	0.473934	UP	intron (NM_001127393, intron 1 of 4)	NM_001127393	172	9556	NM_004894	ATP5MPL	1.07724
chr16	11349875	11350331	1_NT1_cutoff_0.02_peak_9560	194.2	92	1.48e-20	2.11	0.473934	UP	promoter-TSS (NM_003745)	NM_003745	-64	8651	NM_003745	SOCS1	1.07724
chr17	44302673	44302915	3_NTT1_cutoff_0.02_peak_8733	52.6	25	1.59e-06	2.11	0.473934	UP	promoter-TSS (NM_001193465).2	NM_001193465	-54	284058	NM_015443	KANSL1	1.07724
chr18	18691561	18692078	3_NTT1_cutoff_0.02_peak_9405	105.3	50	8.26e-12	2.11	0.473934	UP	promoter-TSS (NM_005406)	NM_005406	-8	6093	NM_005406	ROCK1	1.07724
chr18	44702541	44702820	1_NT1_cutoff_0.02_peak_12510	80.3	38	1.98e-09	2.11	0.473934	UP	promoter-TSS (NM_016097)	NM_016097	64	51124	NM_016097	IER3IP1	1.07724
chr2	15701289	15701555	1_NT1_cutoff_0.02_peak_14680	61.3	29	1.5e-07	2.11	0.473934	UP	promoter-TSS (NR_052013)	NM_015909	50	51594	NM_015909	NBAS	1.07724
chr2	70120964	70121530	1_NT1_cutoff_0.02_peak_15112	99.3	47	2.68e-11	2.11	0.473934	UP	intron (NM_006857, intron 1 of 5)	NM_006857	172	11017	NM_006857	SNRNP27	1.07724
chr2	150443431	150443620	3_NTT1_cutoff_0.02_peak_11692	19	9	0.00532	2.11	0.473934	UP	promoter-TSS (NR_110240)	NR_110240	-346	101929231	NR_110240	LOC101929231	1.07724
chr20	44440899	44441713	3_NTT1_cutoff_0.02_peak_12600	132.9	63	2.4e-14	2.11	0.473934	UP	promoter-TSS (NM_181799)	NR_104037	91	11065	NM_007019	UBE2C	1.07724
chr5	172410632	172411029	3_NTT1_cutoff_0.02_peak_15964	156.2	74	7.31e-17	2.11	0.473934	UP	promoter-TSS (NM_003945)	NM_003945	68	8992	NM_003945	ATP6V0E1	1.07724
chr9	125693478	125694154	1_NT1_cutoff_0.02_peak_25964	162.3	77	2.27e-17	2.11	0.473934	UP	promoter-TSS (NM_020924)	NM_020924	14	57684	NM_020924	ZBTB26	1.07724
chr9	135230134	135230470	1_NT1_cutoff_0.02_peak_26184	164.9	78	1.54e-17	2.11	0.473934	UP	promoter-TSS (NM_001351528)	NM_001351527	-59	23064	NM_015046	SETX	1.07724
chr1	44115940	44116395	3_NTT1_cutoff_0.02_peak_688	245.1	117	4.31e-25	2.1	0.47619	UP	intron (NM_014663, intron 1 of 21)	NM_014663	371	9682	NM_014663	KDM4A	1.07039
chr1	206785348	206786052	3_NTT1_cutoff_0.02_peak_2091	457.4	218	2.75e-45	2.1	0.47619	UP	5' UTR (NM_006893, exon 1 of 15)	NM_001201478	204	1939	NM_006893	EIF2D	1.07039
chr11	14520877	14521658	1_NT1_cutoff_0.02_peak_4426	292.6	139	9.16e-30	2.1	0.47619	UP	5' UTR (NM_016451, exon 1 of 22)	NM_016451	136	1315	NM_016451	COPB1	1.07039
chr12	118814406	118814714	1_NT1_cutoff_0.02_peak_6912	63	30	1.01e-07	2.1	0.47619	UP	exon (NM_022491, exon 1 of 12)	NM_022491	202	64426	NM_022491	SUDS3	1.07039
chr16	1401646	1402047	1_NT1_cutoff_0.02_peak_9328	176.1	84	1.49e-18	2.1	0.47619	UP	promoter-TSS (NM_032520)	NM_001001410	26	115939	NM_001001410	TSR3	1.07039
chr16	21964514	21964901	1_NT1_cutoff_0.02_peak_9680	193.3	92	3.14e-20	2.1	0.47619	UP	5' UTR (NM_003366, exon 1 of 14)	NM_003366	323	7385	NM_003366	UQCRC2	1.07039
chr16	67260688	67261289	3_NTT1_cutoff_0.02_peak_7653	216.6	103	2.08e-22	2.1	0.47619	UP	promoter-TSS (NR_134524)	NM_001318217	-27	29100	NM_014187	TMEM208	1.07039
chr17	61904660	61905243	1_NT1_cutoff_0.02_peak_11773	252	120	6.39e-26	2.1	0.47619	UP	promoter-TSS (NM_001199163)	NM_017647	79	117246	NM_017647	FTSJ3	1.07039
chr19	40030485	40030920	1_NT1_cutoff_0.02_peak_13873	146.7	70	1.56e-15	2.1	0.47619	UP	exon (NM_153232, exon 1 of 1)	NM_153232	135	163126	NM_153232	EID2	1.07039
chr19	46010580	46010990	1_NT1_cutoff_0.02_peak_14114	258.1	123	2e-26	2.1	0.47619	UP	promoter-TSS (NM_003370)	NM_003370	97	7408	NM_003370	VASP	1.07039
chr2	242041562	242042087	1_NT1_cutoff_0.02_peak_16201	241.7	115	9.36e-25	2.1	0.47619	UP	promoter-TSS (NM_182501)	NM_001330180	-78	130916	NM_182501	MTERF4	1.07039
chr21	35013744	35014166	3_NTT1_cutoff_0.02_peak_12889	101	48	3.84e-11	2.1	0.47619	UP	promoter-TSS (NM_001331012)	NM_145858	205	9946	NM_145311	CRYZL1	1.07039
chr21	38738032	38740302	1_NT1_cutoff_0.02_peak_17187	665.4	317	4.29e-65	2.1	0.47619	UP	promoter-TSS (NM_101395)	NM_001347723	-69	1859	NM_001396	DYRK1A	1.07039
chr3	132378913	132379782	3_NTT1_cutoff_0.02_peak_14111	205.4	98	3.05e-21	2.1	0.47619	UP	promoter-TSS (NM_032169)	NM_001321238	-193	79876	NM_024818	UBA5	1.07039
chr4	48832937	48833675	3_NTT1_cutoff_0.02_peak_14750	250.3	119	9.42e-26	2.1	0.47619	UP	promoter-TSS (NM_001168254)	NM_001168254	-17	54940	NM_017830	OCIAD1	1.07039
chr6	110012285	110012510	3_NTT1_cutoff_0.02_peak_16732	48.3	23	3.54e-06	2.1	0.47619	UP	promoter-TSS (NM_001145128)	NM_145025	17	221264	NM_145025	AK9	1.07039
chr7	6413859	6414627	1_NT1_cutoff_0.02_peak_23100	222.7	106	6.48e-23	2.1	0.47619	UP	5' UTR (NM_018890, exon 1 of 7)	NM_006908	117	5879	NM_006908	RAC1	1.07039
chr7	102004185	102004606	3_NTT1_cutoff_0.02_peak_17678	134.6	64	1.62e-14	2.1	0.47619	UP	promoter-TSS (NR_038967)	NR_038967	88	100630923	NR_038967	LOC100630923	1.07039
chrX	70288474	70288779	1_NT1_cutoff_0.02_peak_26660	48.3	23	3.54e-06	2.1	0.47619	UP	promoter-TSS (NM_013346)	NM_001256187	-329	29934	NM_013346	SNX12	1.07039
chr1	110881947	110882396	1_NT1_cutoff_0.02_peak_1486	167.4	80	1.49e-17	2.09	0.478469	UP	promoter-TSS (NR_036595)	NM_022768	227	64783	NM_022768	RBM15	1.0635
chr1	160255196	160255475	3_NTT1_cutoff_0.02_peak_1696	39.7	19	3.82e-05	2.09	0.478469	UP	promoter-TSS (NM_002857)	NM_001193644	-395	5824	NM_002857	PEX19	1.0635
chr11	45929345	45929637	3_NTT1_cutoff_0.02_peak_3448	39.7	19	3.82e-05	2.09	0.478469	UP	promoter-TSS (NM_001080446)	NM_001080446	-658	143678	NM_001080446	C11orf94	1.0635
chr11	65122015	65122360	3_NTT1_cutoff_0.02_peak_3686	104.4	50	1.75e-11	2.09	0.478469	UP	promoter-TSS (NM_145719)	NM_145719	-94	220359	NM_145719	TIGD3	1.0635
chr12	110486177	110486696	1_NT1_cutoff_0.02_peak_6830	142.4	68	3.4e-15	2.09	0.478469	UP	promoter-TSS (NR_148516)	NR_148517	15	400073	NM_207435	C12orf76	1.0635
chr15	43882154	43882340	3_NTT1_cutoff_0.02_peak_6478	25	12	0.000686	2.09	0.478469	UP	promoter-TSS (NM_001354386)	NM_001354386	-106	9677	NM_014659	PPIP5K1	1.0635
chr17	11924052	11924402	1_NT1_cutoff_0.02_peak_10742	129.5	62	7.49e-14	2.09	0.478469	UP	promoter-TSS (NM_003010)	NM_001281435	92	6416	NM_003010	MAP2K4	1.0635
chr17	27181768	27182285	1_NT1_cutoff_0.02_peak_10931	163.1	78	3.26e-17	2.09	0.478469	UP	promoter-TSS (NM_001317986)	NM_005702	52	26284	NM_005702	ERAL1	1.0635
chr17	27717060	27718250	3_NTT1_cutoff_0.02_peak_8378	429	205	3.86e-42	2.09	0.478469	UP	promoter-TSS (NM_020791)	NR_039749	-25	100616122	NR_039749	MIR4523	1.0635
chr17	38136936	38137372	1_NT1_cutoff_0.02_peak_11210	185.6	89	4.47e-19	2.09	0.478469	UP	5' UTR (NM_002809, exon 1 of 12)	NM_002809	133	5709	NM_002809	PSMD3	1.0635
chr3	99979395	99980023	1_NT1_cutoff_0.02_peak_18700	138.1	66	7.43e-15	2.09	0.478469	UP	promoter-TSS (NM_018309)	NM_001199198	48	55773	NM_018309	TBC1D23	1.0635
chr9	115983373	115984129	1_NT1_cutoff_0.02_peak_25917	163.1	78	3.26e-17	2.09	0.478469	UP	promoter-TSS (NM_015258)	NM_001859	-57	1317	NM_001859	SLC31A1	1.0635
chr11	73882256	73882581	1_NT1_cutoff_0.02_peak_5169	110.5	53	5.38e-12	2.08	0.480769	UP	promoter-TSS (NM_015531)	NM_001271593	311	51400	NM_016147	PPME1	1.05658
chr16	15982217	15982570	1_NT1_cutoff_0.02_peak_9618	156.2	75	2.21e-16	2.08	0.480769	UP	intron (NR_130755, intron 1 of 3)	NM_001304499	112	123811	NM_144600	FOPNL	1.05658
chr16	57496380	57496865	1_NT1_cutoff_0.02_peak_9979	202	97	1.98e-20	2.08	0.480769	UP	promoter-TSS (NM_032940)	NM_032940	72	5432	NM_002694	POLR2C	1.05658
chr17	70117071	70117343	1_NT1_cutoff_0.02_peak_11852	60.4	29	3.19e-07	2.08	0.480769	UP	promoter-TSS (NR_103737)	NM_000346	46	6662	NM_000346	SOX9	1.05658
chr19	44598453	44598648	3_NTT1_cutoff_0.02_peak_10560	76.8	37	1.32e-08	2.08	0.480769	UP	promoter-TSS (NM_013398)	NM_013398	69	7767	NM_013398	ZNF224	1.05658
chr2	61244819	61245072	1_NT1_cutoff_0.02_peak_15036	76.8	37	1.32e-08	2.08	0.480769	UP	promoter-TSS (NM_001322124)	NM_002618	134	5194	NM_002618	PEX13	1.05658
chr22	39928533	39929235	1_NT1_cutoff_0.02_peak_17816	195.9	94	6.37e-20	2.08	0.480769	UP	promoter-TSS (NM_194326)	NR_130151	-24	91582	NM_194326	RPS19BP1	1.05658
chr3	16306166	16306929	1_NT1_cutoff_0.02_peak_18194	224.4	108	1.31e-22	2.08	0.480769	UP	promoter-TSS (NM_001352981)	NR_148220	-37	92106	NM_138381	OXNAD1	1.05658
chr3	184529808	184530124	3_NTT1_cutoff_0.02_peak_14404	85.4	41	1.28e-09	2.08	0.480769	UP	promoter-TSS (NR_146116)	NR_146113	35	23355	NM_015303	VPS8	1.05658
chr4	83812060	83812773	1_NT1_cutoff_0.02_peak_19934	332.3	160	1.18e-32	2.08	0.480769	UP	promoter-TSS (NM_001191049)	NM_016211	16	22872	NM_014933	SEC31A	1.05658
chr6	41747541	41747755	3_NTT1_cutoff_0.02_peak_16451	56.1	27	7.11e-07	2.08	0.480769	UP	promoter-TSS (NM_013397)	NM_006653	-5	10817	NM_006653	FRS3	1.05658
chr7	44621309	44622293	1_NT1_cutoff_0.02_peak_23335	331.4	159	8.34e-33	2.08	0.480769	UP	promoter-TSS (NM_001303062)	NM_001303062	93	222068	NM_182547	TMED4	1.05658
chr1	22379028	22379997	1_NT1_cutoff_0.02_peak_398	333.2	161	1.67e-32	2.07	0.483092	UP	intron (NM_001791, intron 1 of 5)	NM_001791	393	998	NM_001791	CDC42	1.04963
chr1	151584439	151584879	3_NTT1_cutoff_0.02_peak_1458	126	61	2.32e-13	2.07	0.483092	UP	promoter-TSS (NM_001330723)	NM_030918	-3	81609	NM_030918	SNX27	1.04963
chr1	202776469	202777726	1_NT1_cutoff_0.02_peak_2497	624	301	1.57e-59	2.07	0.483092	UP	intron (NM_001347591, intron 1 of 25)	NM_001347591	1500	10765	NM_006618	KDM5B	1.04963
chr11	66445135	66445748	1_NT1_cutoff_0.02_peak_4997	167.4	81	4.42e-17	2.07	0.483092	UP	promoter-TSS (NM_031492)	NM_001286135	-50	83759	NM_031492	RBM4B	1.04963
chr12	11323677	11324440	1_NT1_cutoff_0.02_peak_5755	273.6	132	5.58e-27	2.07	0.483092	UP	non-coding (NR_037918, exon 1 of 10)	NM_001291315	163	5554	NM_006250	PRH1	1.04963
chr12	49351054	49351456	1_NT1_cutoff_0.02_peak_5989	136.4	66	3.27e-14	2.07	0.483092	UP	promoter-TSS (NM_001659)	NM_001659	-3	377	NM_001659	ARF3	1.04963
chr17	33913998	33914649	1_NT1_cutoff_0.02_peak_11086	183.8	89	1.94e-18	2.07	0.483092	UP	promoter-TSS (NM_001282)	NM_001030006	42	163	NM_001282	AP2B1	1.04963
chr17	43224547	43227721	1_NT1_cutoff_0.02_peak_11436	1670.9	808	1.2e-154	2.07	0.483092	UP	5' UTR (NM_006460, exon 1 of 1)	NM_006460	1450	10614	NM_006460	HEXIM1	1.04963
chr17	45266473	45266763	1_NT1_cutoff_0.02_peak_11470	107.9	52	1.67e-11	2.07	0.483092	UP	promoter-TSS (NM_001114091)	NM_001114091	87	996	NM_001256	CDC27	1.04963
chr19	47729394	47730109	1_NT1_cutoff_0.02_peak_14170	502.3	243	6.91e-48	2.07	0.483092	UP	promoter-TSS (NR_036158)	NR_036158	-447	100422899	NR_036158	MIR3190	1.04963
chr19	54618537	54619357	1_NT1_cutoff_0.02_peak_14403	397.9	192	2.33e-38	2.07	0.483092	UP	promoter-TSS (NM_001321792)	NM_013342	108	29844	NM_013342	TFPT	1.04963
chr2	88927337	88927641	1_NT1_cutoff_0.02_peak_15268	62.1	30	2.14e-07	2.07	0.483092	UP	promoter-TSS (NM_004836)	NR_135540	142	101928403	NR_135540	LOC101928403	1.04963
chr2	202316081	202316335	3_NTT1_cutoff_0.02_peak_12016	57.8	28	1e-06	2.07	0.483092	UP	promoter-TSS (NM_018571)	NM_015049	111	66008	NM_015049	TRAK2	1.04963
chr2	219081465	219082594	1_NT1_cutoff_0.02_peak_15985	413.4	200	1.05e-39	2.07	0.483092	UP	promoter-TSS (NM_005731)	NM_005731	-90	10109	NM_005731	ARPC2	1.04963
chr22	31365700	31365937	1_NT1_cutoff_0.02_peak_17587	51.8	25	3.35e-06	2.07	0.483092	UP	non-coding (NR_110492, exon 1 of 4)	NR_152871	622	55000	NR_002323	TUG1	1.04963
chr3	45429892	45430252	1_NT1_cutoff_0.02_peak_18322	82.9	40	4e-09	2.07	0.483092	UP	promoter-TSS (NM_015340)	NM_015340	-3	23395	NM_015340	LARS2	1.04963
chr4	54930518	54931130	1_NT1_cutoff_0.02_peak_19774	192.5	93	1.96e-19	2.07	0.483092	UP	promoter-TSS (NM_012110)	NM_012110	-9	26511	NM_012110	CHIC2	1.04963
chr4	166248715	166249221	1_NT1_cutoff_0.02_peak_20224	225.3	109	1.85e-22	2.07	0.483092	UP	intron (NM_001017369, intron 1 of 4)	NM_001017369	150	6307	NM_006745	MSMO1	1.04963
chr5	137878668	137879558	1_NT1_cutoff_0.02_peak_20986	717.2	346	4.92e-68	2.07	0.483092	UP	promoter-TSS (NM_001256302)	NM_001291975	-124	2107	NM_004730	ETF1	1.04963
chr6	43603343	43603780	1_NT1_cutoff_0.02_peak_22099	146.7	71	4.6e-15	2.07	0.483092	UP	promoter-TSS (NM_014628)	NM_014628	-15	9587	NM_014628	MAD2L1BP	1.04963
chr7	102212809	102213124	1_NT1_cutoff_0.02_peak_23847	246.8	119	1.82e-24	2.07	0.483092	UP	exon (NM_001097615, exon 1 of 9)	NM_001097615	101	548644	NM_001015884	POLR2J3	1.04963
chr7	102937735	102938088	1_NT1_cutoff_0.02_peak_23853	120	58	1.57e-12	2.07	0.483092	UP	promoter-TSS (NM_004279)	NM_004279	39	9512	NM_004279	PMPCB	1.04963
chr7	115851289	115851770	1_NT1_cutoff_0.02_peak_23933	124.3	60	3.44e-13	2.07	0.483092	UP	intron (NM_015641, intron 1 of 6)	NM_015641	983	26136	NM_015641	TES	1.04963
chr8	96145922	96146203	3_NTT1_cutoff_0.02_peak_18273	62.1	30	2.14e-07	2.07	0.483092	UP	5' UTR (NM_024613, exon 1 of 2)	NM_024613	114	79666	NM_024613	PLEKHF2	1.04963
chr9	136223692	136224024	3_NTT1_cutoff_0.02_peak_19306	51.8	25	3.35e-06	2.07	0.483092	UP	promoter-TSS (NM_003172)	NM_001278928	437	6835	NM_017503	SURF2	1.04963
chrX	15693744	15694085	3_NTT1_cutoff_0.02_peak_19447	109.6	53	1.13e-11	2.07	0.483092	UP	intron (NR_026551, intron 2 of 4)	NR_026551	876	340591	NR_026551	CA5BP1	1.04963
chrX	46404821	46405156	1_NT1_cutoff_0.02_peak_26512	115.7	56	3.45e-12	2.07	0.483092	UP	promoter-TSS (NM_001146291)	NR_015378	64	401588	NR_015378	ZNF674-AS1	1.04963
chr1	40723265	40724073	1_NT1_cutoff_0.02_peak_870	328.8	160	2.17e-31	2.06	0.485437	UP	promoter-TSS (NM_005857)	NM_005857	-53	10269	NM_005857	ZMPSTE24	1.04264
chr11	31530948	31531484	1_NT1_cutoff_0.02_peak_4481	142.4	69	1.01e-14	2.06	0.485437	UP	promoter-TSS (NM_001288726)	NM_144981	-41	196294	NM_144981	IMMP1L	1.04264
chr11	47270190	47270599	3_NTT1_cutoff_0.02_peak_3474	138.1	67	2.21e-14	2.06	0.485437	UP	promoter-TSS (NM_001302490)	NM_001302490	3	53	NM_001610	ACP2	1.04264
chr14	103803864	103804885	3_NTT1_cutoff_0.02_peak_6296	84.6	41	2.69e-09	2.06	0.485437	UP	TTS (NR_002964)	NR_002964	189	677811	NR_002964	SNORA28	1.04264
chr16	619792	620138	1_NT1_cutoff_0.02_peak_9281	111.3	54	7.59e-12	2.06	0.485437	UP	promoter-TSS (NM_004204)	NM_004204	-3	9091	NM_004204	PIGQ	1.04264
chr16	67926791	67927373	1_NT1_cutoff_0.02_peak_10066	166.6	81	9.17e-17	2.06	0.485437	UP	promoter-TSS (NM_006742)	NM_006742	-93	5681	NM_006742	PSKH1	1.04264
chr17	74068436	74068999	1_NT1_cutoff_0.02_peak_11982	284.8	138	1.12e-27	2.06	0.485437	UP	promoter-TSS (NM_001260502)	NM_001260502	-111	6730	NM_014230	SRP68	1.04264
chr22	31477116	31477540	3_NTT1_cutoff_0.02_peak_13113	138.1	67	2.21e-14	2.06	0.485437	UP	promoter-TSS (NM_006932)	NM_006932	46	6525	NM_006932	SMTN	1.04264
chr3	100428803	100429119	3_NTT1_cutoff_0.02_peak_13979	37.1	18	5.75e-05	2.06	0.485437	UP	intron (NM_006070, intron 1 of 7)	NM_001195478	575	10342	NM_006070	TFG	1.04264
chr3	187463042	187463371	1_NT1_cutoff_0.02_peak_19369	127.7	62	3.26e-13	2.06	0.485437	UP	5' UTR (NM_001706, exon 1 of 10)	NM_001706	306	604	NM_001706	BCL6	1.04264
chr5	133983382	133983615	3_NTT1_cutoff_0.02_peak_15549	26.8	13	0.000966	2.06	0.485437	UP	promoter-TSS (NM_021982)	NM_021982	-976	10802	NM_021982	SEC24A	1.04264
chr5	139936645	139937335	1_NT1_cutoff_0.02_peak_21053	406.5	197	6.95e-39	2.06	0.485437	UP	promoter-TSS (NM_001253764)	NR_045587	51	10011	NM_001035235	SRA1	1.04264
chr6	80657095	80657424	3_NTT1_cutoff_0.02_peak_16634	123.4	60	7.16e-13	2.06	0.485437	UP	promoter-TSS (NM_022726)	NM_022726	55	6785	NM_022726	ELOVL4	1.04264
chr7	75508243	75508568	1_NT1_cutoff_0.02_peak_23580	113.1	55	5.12e-12	2.06	0.485437	UP	promoter-TSS (NM_001346189)	NR_144391	96	57414	NM_020684	RHBDD2	1.04264
chr7	104631333	104631798	3_NTT1_cutoff_0.02_peak_17744	37.1	18	5.75e-05	2.06	0.485437	UP	promoter-TSS (NR_039981)	NR_039981	46	100216546	NR_039981	LINC01004	1.04264
chr7	140624317	140625033	3_NTT1_cutoff_0.02_peak_17862	123.4	60	7.16e-13	2.06	0.485437	UP	promoter-TSS (NM_001354609)	NM_001354609	53	673	NM_004333	BRAF	1.04264
chr8	21776871	21777382	1_NT1_cutoff_0.02_peak_24373	139.8	68	3.09e-14	2.06	0.485437	UP	promoter-TSS (NM_015024)	NM_015024	-53	23039	NM_015024	XPO7	1.04264
chr8	104033037	104033490	1_NT1_cutoff_0.02_peak_24820	210.6	102	5.87e-21	2.06	0.485437	UP	promoter-TSS (NM_001695)	NM_001695	16	528	NM_001695	ATP6V1C1	1.04264
chr1	25573492	25574315	1_NT1_cutoff_0.02_peak_467	435.9	213	1.22e-40	2.05	0.487805	UP	non-coding (NR_135143, exon 1 of 4)	NR_135786	106	57035	NM_020317	RSRP1	1.03562
chr1	54665677	54666187	3_NTT1_cutoff_0.02_peak_873	182.1	89	4.01e-18	2.05	0.487805	UP	promoter-TSS (NM_016491)	NM_001330602	92	51253	NM_016491	MRPL37	1.03562
chr11	86013005	86013736	1_NT1_cutoff_0.02_peak_5249	192.5	94	5.68e-19	2.05	0.487805	UP	non-coding (NR_136324, exon 1 of 6)	NM_001322409	102	51501	NM_016401	HIKESHI	1.03562
chr15	41785929	41786249	3_NTT1_cutoff_0.02_peak_6452	49.2	24	5.02e-06	2.05	0.487805	UP	promoter-TSS (NM_002220)	NM_002220	33	3706	NM_002220	ITPKA	1.03562
chr16	31519449	31520014	3_NTT1_cutoff_0.02_peak_7561	237.4	116	5.16e-23	2.05	0.487805	UP	promoter-TSS (NM_022744)	NM_022744	8	64755	NM_022744	C16orf58	1.03562
chr16	89556694	89557089	1_NT1_cutoff_0.02_peak_10354	151.9	74	2.94e-15	2.05	0.487805	UP	promoter-TSS (NM_001256182)	NM_013275	77	29123	NM_013275	ANKRD11	1.03562
chr17	79603891	79604403	1_NT1_cutoff_0.02_peak_12138	223.5	109	7.91e-22	2.05	0.487805	UP	promoter-TSS (NM_001290212)	NM_017921	32	55666	NM_017921	NPLOC4	1.03562
chr19	47287866	47288093	3_NTT1_cutoff_0.02_peak_10642	43.2	21	1.69e-05	2.05	0.487805	UP	5' UTR (NM_001145145, exon 1 of 7)	NM_001145145	154	6510	NM_005628	SLC1A5	1.03562
chr2	25194159	25195332	1_NT1_cutoff_0.02_peak_14742	373.7	182	2.06e-35	2.05	0.487805	UP	promoter-TSS (NR_034113)	NM_016544	217	51277	NM_016544	DNAJC27	1.03562
chr2	114513692	114514630	1_NT1_cutoff_0.02_peak_15447	361.6	176	2.11e-34	2.05	0.487805	UP	non-coding (NR_104470, exon 1 of 17)	NR_104470	109	80255	NM_025181	SLC35F5	1.03562
chr20	18547607	18548268	3_NTT1_cutoff_0.02_peak_12367	196.8	96	2.6e-19	2.05	0.487805	UP	promoter-TSS (NM_001348958)	NM_001348958	-126	388789	NM_001348957	SMIM26	1.03562
chr22	50312268	50312479	1_NT1_cutoff_0.02_peak_18012	55.2	27	1.5e-06	2.05	0.487805	UP	promoter-TSS (NM_024324)	NM_001135101	96	79174	NM_024324	CRELD2	1.03562
chr3	197463912	197464181	1_NT1_cutoff_0.02_peak_19501	55.2	27	1.5e-06	2.05	0.487805	UP	promoter-TSS (NM_014687)	NM_001346873	-250	9711	NM_014687	RUBCN	1.03562
chr5	114962007	114962167	1_NT1_cutoff_0.02_peak_20792	43.2	21	1.69e-05	2.05	0.487805	UP	promoter-TSS (NM_181836)	NM_181836	-211	51014	NM_181836	TMED7	1.03562
chr5	140079839	140080349	1_NT1_cutoff_0.02_peak_21069	198.5	97	1.76e-19	2.05	0.487805	UP	intron (NM_144723, intron 1 of 5)	NM_144723	149	153527	NM_144723	ZMAT2	1.03562
chr6	42185345	42185775	1_NT1_cutoff_0.02_peak_22039	170	83	4.19e-17	2.05	0.487805	UP	promoter-TSS (NM_018141)	NM_018141	73	55173	NM_018141	MRPS10	1.03562
chr6	42981952	42982143	1_NT1_cutoff_0.02_peak_22060	59.6	29	6.7e-07	2.05	0.487805	UP	promoter-TSS (NM_001318942)	NM_057161	207	116138	NM_057161	KLHDC3	1.03562
chr8	41909253	41909927	3_NTT1_cutoff_0.02_peak_18125	178.7	87	8.77e-18	2.05	0.487805	UP	promoter-TSS (NM_001305878)	NM_001305878	-46	7994	NM_006766	KAT6A	1.03562
chr8	101170021	101170196	3_NTT1_cutoff_0.02_peak_18299	43.2	21	1.69e-05	2.05	0.487805	UP	promoter-TSS (NM_003114)	NM_172218	-154	6674	NM_003114	SPAG1	1.03562
chr1	2322818	2323887	1_NT1_cutoff_0.02_peak_126	398.7	195	2.71e-37	2.04	0.490196	UP	promoter-TSS (NR_125361)	NM_007033	139	11079	NM_007033	RER1	1.02857
chr1	38397296	38397541	3_NTT1_cutoff_0.02_peak_603	22.4	11	0.00225	2.04	0.490196	UP	promoter-TSS (NM_001297434)	NM_001297434	44	3633	NM_005540	INPP5B	1.02857
chr10	35625035	35625696	1_NT1_cutoff_0.02_peak_3266	185.6	91	3.77e-18	2.04	0.490196	UP	promoter-TSS (NM_001282852)	NM_001282854	-436	219771	NM_145012	CCNY	1.02857
chr11	108337976	108338518	3_NTT1_cutoff_0.02_peak_4072	255.5	125	1.55e-24	2.04	0.490196	UP	promoter-TSS (NM_001351110)	NM_001330368	11	160140	NM_152587	C11orf65	1.02857
chr12	75905198	75905732	1_NT1_cutoff_0.02_peak_6636	163.1	80	2.79e-16	2.04	0.490196	UP	promoter-TSS (NM_007043)	NM_007043	-47	11103	NM_007043	KRR1	1.02857
chr12	122688162	122688413	1_NT1_cutoff_0.02_peak_7006	50.9	25	6.95e-06	2.04	0.490196	UP	promoter-TSS (NM_001330492)	NM_001330492	60	79369	NM_030765	B3GNT4	1.02857
chr15	85197052	85197877	1_NT1_cutoff_0.02_peak_9052	290	142	2.06e-27	2.04	0.490196	UP	promoter-TSS (NR_130944)	NR_130944	12	84942	NM_032856	WDR73	1.02857
chr16	88729346	88729639	3_NTT1_cutoff_0.02_peak_7877	83.7	41	5.56e-09	2.04	0.490196	UP	promoter-TSS (NR_024402)	NM_002461	64	4597	NM_002461	MVD	1.02857
chr17	26684179	26684880	1_NT1_cutoff_0.02_peak_10905	363.4	178	4.09e-34	2.04	0.490196	UP	promoter-TSS (NM_001290145)	NM_152464	-74	147007	NM_152464	TMEM199	1.02857
chr19	54641327	54642210	1_NT1_cutoff_0.02_peak_14405	354.7	174	3.96e-33	2.04	0.490196	UP	intron (NM_014516, intron 1 of 17)	NM_014516	333	4849	NM_014516	CNOT3	1.02857
chr20	37101043	37101718	1_NT1_cutoff_0.02_peak_16716	203.7	100	1.12e-19	2.04	0.490196	UP	promoter-TSS (NM_020336)	NM_001282917	-68	57148	NM_020336	RALGAPB	1.02857
chr22	42228409	42228866	1_NT1_cutoff_0.02_peak_17889	79.4	39	1.23e-08	2.04	0.490196	UP	promoter-TSS (NM_004599)	NM_004599	-445	6721	NM_004599	SREBF2	1.02857
chr5	79703301	79704310	3_NTT1_cutoff_0.02_peak_15364	321.9	158	4.08e-30	2.04	0.490196	UP	promoter-TSS (NM_001284237)	NM_001349434	-26	9765	NM_014733	ZFYVE16	1.02857
chr5	132298422	132299947	1_NT1_cutoff_0.02_peak_20883	627.5	307	1.04e-57	2.04	0.490196	UP	5' UTR (NM_014423, exon 1 of 21)	NM_014423	169	27125	NM_014423	AFF4	1.02857
chr5	159845801	159846491	3_NTT1_cutoff_0.02_peak_15907	285.7	140	4.49e-27	2.04	0.490196	UP	promoter-TSS (NM_006425)	NM_006425	22	10569	NM_006425	SLU7	1.02857
chr6	20534579	20534898	1_NT1_cutoff_0.02_peak_21707	101.8	50	1.57e-10	2.04	0.490196	UP	promoter-TSS (NM_017774)	NM_017774	51	54901	NM_017774	CDKAL1	1.02857
chr6_mcf_hap5	3050613	3050803	1_NT1_cutoff_0.02_peak_22850	22.4	11	0.00225	2.04	0.490196	UP	promoter-TSS (NM_001177515)	NR_033489	110	7920	NM_021160	ABHD16A	1.02857
chr9	21335114	21335589	3_NTT1_cutoff_0.02_peak_18714	107.9	53	4.8e-11	2.04	0.490196	UP	promoter-TSS (NM_018847)	NM_018847	79	55958	NM_018847	KLHL9	1.02857
chr9	135753699	135753898	3_NTT1_cutoff_0.02_peak_19292	73.4	36	4.07e-08	2.04	0.490196	UP	promoter-TSS (NM_001316900)	NR_133631	92	11092	NM_018956	SPACA9	1.02857
chrX	47053042	47053653	1_NT1_cutoff_0.02_peak_26520	238.2	117	7.17e-23	2.04	0.490196	UP	5' UTR (NM_003334, exon 1 of 26)	NM_003334	147	7317	NM_003334	UBA1	1.02857
chrX	64754499	64754713	1_NT1_cutoff_0.02_peak_26648	61.3	30	4.48e-07	2.04	0.490196	UP	promoter-TSS (NM_001170649)	NM_031206	80	81887	NM_031206	LAS1L	1.02857
chr1	27023391	27024905	3_NTT1_cutoff_0.02_peak_354	148.5	73	8.92e-15	2.03	0.492611	UP	intron (NM_139135, intron 1 of 19)	NM_139135	1624	8289	NM_006015	ARID1A	1.02148
chr1	46767679	46768338	1_NT1_cutoff_0.02_peak_1062	138.1	68	6.36e-14	2.03	0.492611	UP	intron (NM_006369, intron 1 of 9)	NM_006369	1029	10489	NM_006369	LRRC41	1.02148
chr1	100598360	100598892	1_NT1_cutoff_0.02_peak_1435	126	62	6.73e-13	2.03	0.492611	UP	promoter-TSS (NR_135078)	NM_194292	25	163786	NM_194292	SASS6	1.02148
chr1	151137744	151137902	1_NT1_cutoff_0.02_peak_1734	40.6	20	5.32e-05	2.03	0.492611	UP	promoter-TSS (NR_037937)	NM_212551	547	388695	NM_212551	LYSMD1	1.02148
chr1	222816950	222817861	1_NT1_cutoff_0.02_peak_2690	601.6	297	3.59e-54	2.03	0.492611	UP	promoter-TSS (NM_001300867)	NM_001300867	-239	375056	NM_198551	MIA3	1.02148
chr1	228327839	228328232	1_NT1_cutoff_0.02_peak_2806	296	146	8.87e-28	2.03	0.492611	UP	exon (NM_001242840, exon 1 of 7)	NM_000858	107	2987	NM_000858	GUK1	1.02148
chr11	64052793	64053522	3_NTT1_cutoff_0.02_peak_3645	138.1	68	6.36e-14	2.03	0.492611	UP	promoter-TSS (NM_001170880)	NM_020155	-424	56834	NM_020155	GPR137	1.02148
chr13	45563443	45563890	3_NTT1_cutoff_0.02_peak_5334	144.1	71	1.96e-14	2.03	0.492611	UP	promoter-TSS (NM_018559)	NM_001316952	2	55425	NM_018559	GPALPP1	1.02148
chr17	4045637	4045862	3_NTT1_cutoff_0.02_peak_8013	28.5	14	0.000635	2.03	0.492611	UP	promoter-TSS (NM_144611)	NM_015113	503	23140	NM_015113	ZZEF1	1.02148
chr2	64751056	64751741	1_NT1_cutoff_0.02_peak_15071	186.4	92	5.21e-18	2.03	0.492611	UP	promoter-TSS (NM_203437)	NM_001002243	-40	54812	NM_017657	AFTPH	1.02148
chr2	150443701	150444610	3_NTT1_cutoff_0.02_peak_11693	267.6	132	4.22e-25	2.03	0.492611	UP	non-coding (NR_110240, exon 1 of 3)	NM_015702	174	27249	NM_015702	MMADHC	1.02148
chr2	203878948	203879428	3_NTT1_cutoff_0.02_peak_12033	69	34	9.05e-08	2.03	0.492611	UP	promoter-TSS (NM_001114132)	NM_001114132	-414	65065	NM_198945	NBEAL1	1.02148
chr20	16710408	16710897	1_NT1_cutoff_0.02_peak_16378	198.5	98	4.98e-19	2.03	0.492611	UP	promoter-TSS (NM_003092)	NM_003092	44	6629	NM_003092	SNRPB2	1.02148
chr3	128369440	128369861	3_NTT1_cutoff_0.02_peak_14076	150.2	74	6.03e-15	2.03	0.492611	UP	promoter-TSS (NM_002950)	NM_002950	68	6184	NM_002950	RPN1	1.02148
chr3	130612553	130613124	1_NT1_cutoff_0.02_peak_18912	276.2	136	4.36e-26	2.03	0.492611	UP	promoter-TSS (NM_014382)	NM_001199179	4	27032	NM_014382	ATP2C1	1.02148
chr4	144435582	144435872	3_NTT1_cutoff_0.02_peak_15037	28.5	14	0.000635	2.03	0.492611	UP	non-coding (NR_104027, exon 1 of 2)	NR_104027	263	100128055	NR_104027	SMARCA5-AS1	1.02148
chr5	82372933	82373568	1_NT1_cutoff_0.02_peak_20706	278.8	137	2.95e-26	2.03	0.492611	UP	promoter-TSS (NM_174909)	NM_174909	21	153339	NM_174909	TMEM167A	1.02148
chr6	56954568	56955230	1_NT1_cutoff_0.02_peak_22169	162.3	80	5.73e-16	2.03	0.492611	UP	promoter-TSS (NM_001257273)	NM_015555	71	26036	NM_015555	ZNF451	1.02148
chr6	101328702	101328870	3_NTT1_cutoff_0.02_peak_16707	40.6	20	5.32e-05	2.03	0.492611	UP	intron (NM_006828, intron 1 of 41)	NM_022091	462	10973	NM_006828	ASCC3	1.02148
chr7	66461342	66461649	1_NT1_cutoff_0.02_peak_23479	40.6	20	5.32e-05	2.03	0.492611	UP	promoter-TSS (NM_018264)	NM_018264	-296	55253	NM_018264	TYW1	1.02148
chr8	117767773	117768511	1_NT1_cutoff_0.02_peak_24873	279.6	138	4.07e-26	2.03	0.492611	UP	promoter-TSS (NM_003756)	NM_003756	-80	8667	NM_003756	EIF3H	1.02148
chrX	74375994	74376291	1_NT1_cutoff_0.02_peak_26692	87.2	43	2.51e-09	2.03	0.492611	UP	promoter-TSS (NM_001271696)	NM_001271698	32	22	NM_004299	ABCB7	1.02148
chr1	36851888	36852433	3_NTT1_cutoff_0.02_peak_566	137.2	68	1.3e-13	2.02	0.49505	UP	promoter-TSS (NM_032017)	NM_001282547	-633	83931	NM_032017	STK40	1.01436
chr1	151735765	151736214	3_NTT1_cutoff_0.02_peak_1459	283.1	140	1.87e-26	2.02	0.49505	UP	promoter-TSS (NM_001301371)	NM_001301371	34	51686	NM_016178	OAZ3	1.01436
chr10	1094510	1095693	1_NT1_cutoff_0.02_peak_3018	532.5	263	3.88e-48	2.02	0.49505	UP	promoter-TSS (NM_001317957)	NR_134301	204	3422	NM_004508	IDI1	1.01436
chr10	127407745	127408461	1_NT1_cutoff_0.02_peak_4072	299.5	148	8.28e-28	2.02	0.49505	UP	promoter-TSS (NR_033847)	NM_001202438	19	26098	NM_015608	EDRF1	1.01436
chr11	10829263	10831299	1_NT1_cutoff_0.02_peak_4390	1190.2	589	8.06e-105	2.02	0.49505	UP	promoter-TSS (NR_120540)	NM_001042559	301	1982	NM_001418	EIF4G2	1.01436
chr11	102217640	102218205	1_NT1_cutoff_0.02_peak_5298	208	103	7.06e-20	2.02	0.49505	UP	promoter-TSS (NM_001256163)	NM_001256166	10	329	NM_001166	BIRC2	1.01436
chr12	7055251	7056114	1_NT1_cutoff_0.02_peak_5702	234.8	116	4.4e-22	2.02	0.49505	UP	promoter-TSS (NM_080548)	NM_080548	-57	5777	NM_002831	PTPN6	1.01436
chr12	72057080	72058481	1_NT1_cutoff_0.02_peak_6625	499.7	247	3.91e-45	2.02	0.49505	UP	promoter-TSS (NM_144982)	NM_144982	-32	196441	NM_144982	ZFC3H1	1.01436
chr12	123459620	123460032	3_NTT1_cutoff_0.02_peak_5099	107	53	4.8e-11	2.02	0.49505	UP	promoter-TSS (NM_001304833)	NM_001304833	76	79676	NM_024623	OGFOD2	1.01436
chr14	23398929	23399183	1_NT1_cutoff_0.02_peak_7733	101	50	3.2e-10	2.02	0.49505	UP	promoter-TSS (NM_001282954)	NR_110002	238	101926933	NR_110002	LOC101926933	1.01436
chr16	25026547	25026792	3_NTT1_cutoff_0.02_peak_7419	64.7	32	4.14e-07	2.02	0.49505	UP	promoter-TSS (NM_018054)	NM_001006634	29	55114	NM_018054	ARHGAP17	1.01436
chr4	69215488	69215993	3_NTT1_cutoff_0.02_peak_14792	131.2	65	4.23e-13	2.02	0.49505	UP	promoter-TSS (NM_133370)	NM_001031732	94	91746	NM_133370	YTHDC1	1.01436
chr7	99155912	99156871	1_NT1_cutoff_0.02_peak_23728	407.4	202	6.24e-37	2.02	0.49505	UP	promoter-TSS (NM_001085368)	NM_001009960	-56	79027	NM_024061	ZNF655	1.01436
chr1	110577522	110577804	3_NTT1_cutoff_0.02_peak_1177	42.3	21	3.54e-05	2.01	0.497512	UP	intron (NR_073071, intron 1 of 21)	NR_073071	440	85369	NM_033088	STRIP1	1.0072
chr1	145514905	145515346	3_NTT1_cutoff_0.02_peak_1286	68.2	34	1.86e-07	2.01	0.497512	UP	intron (NR_104034, intron 2 of 2)	NR_104033	619	114814	NM_057163	GNRHR2	1.0072
chr1	203764551	203765761	1_NT1_cutoff_0.02_peak_2510	483.3	241	6.67e-43	2.01	0.497512	UP	intron (NM_001350264, intron 1 of 17)	NM_001350262	491	9877	NM_014827	ZC3H11A	1.0072
chr10	27388969	27389824	3_NTT1_cutoff_0.02_peak_2600	252.9	126	3.62e-23	2.01	0.497512	UP	promoter-TSS (NM_014915)	NM_001256053	30	22852	NM_014915	ANKRD26	1.0072
chr10	80828727	80828942	3_NTT1_cutoff_0.02_peak_2897	48.3	24	1.04e-05	2.01	0.497512	UP	promoter-TSS (NM_020338)	NM_020338	43	57178	NM_020338	ZMIZ1	1.0072
chr10	98273557	98273991	3_NTT1_cutoff_0.02_peak_2953	48.3	24	1.04e-05	2.01	0.497512	UP	promoter-TSS (NM_012465)	NM_012465	-91	7093	NM_012465	TLL2	1.0072
chr10	102295596	102295892	1_NT1_cutoff_0.02_peak_3810	126.9	63	1.89e-12	2.01	0.497512	UP	exon (NM_017902, exon 1 of 8)	NM_017902	103	55662	NM_017902	HIF1AN	1.0072
chr11	46615421	46615699	1_NT1_cutoff_0.02_peak_4559	102.7	51	2.15e-10	2.01	0.497512	UP	promoter-TSS (NM_001300731)	NM_001267783	59	55626	NM_017749	AMBRA1	1.0072
chr12	56618014	56618225	3_NTT1_cutoff_0.02_peak_4616	60.4	30	9.25e-07	2.01	0.497512	UP	promoter-TSS (NM_024068)	NM_024068	-5	79035	NM_024068	NABP2	1.0072
chr12	57400121	57400385	3_NTT1_cutoff_0.02_peak_4650	92.4	46	1.56e-09	2.01	0.497512	UP	promoter-TSS (NM_014830)	NM_014830	44	9880	NM_014830	ZBTB39	1.0072
chr12	112280521	112280723	3_NTT1_cutoff_0.02_peak_4943	36.2	18	0.000121	2.01	0.497512	UP	promoter-TSS (NR_152607)	NR_015404	187	51275	NR_015404	MAPKAPK5-AS1	1.0072
chr14	77923735	77924020	1_NT1_cutoff_0.02_peak_8219	126.9	63	1.89e-12	2.01	0.497512	UP	promoter-TSS (NM_001321441)	NM_001193317	105	63894	NM_022067	VIPAS39	1.0072
chr15	50717389	50717557	3_NTT1_cutoff_0.02_peak_6549	18.1	9	0.00532	2.01	0.497512	UP	intron (NM_001128610, intron 1 of 19)	NM_001128610	899	9101	NM_005154	USP8	1.0072
chr15	72978179	72978783	1_NT1_cutoff_0.02_peak_8908	213.2	106	4.43e-20	2.01	0.497512	UP	promoter-TSS (NM_033028)	NM_001350932	9	123346	NM_001350932	HIGD2B	1.0072
chr19	37019009	37019437	3_NTT1_cutoff_0.02_peak_10381	157.1	78	2.56e-15	2.01	0.497512	UP	promoter-TSS (NM_001166037)	NM_001166037	25	339324	NM_001012756	ZNF260	1.0072
chr2	201936627	201937077	1_NT1_cutoff_0.02_peak_15876	136.4	68	2.63e-13	2.01	0.497512	UP	promoter-TSS (NM_001321628)	NM_002491	390	4709	NM_002491	NDUFB3	1.0072
chr22	38349545	38349854	1_NT1_cutoff_0.02_peak_17734	104.4	52	1.45e-10	2.01	0.497512	UP	promoter-TSS (NM_001207062)	NM_001207062	-24	84645	NM_032561	C22orf23	1.0072
chr3	152016483	152016653	3_NTT1_cutoff_0.02_peak_14221	18.1	9	0.00532	2.01	0.497512	UP	promoter-TSS (NM_207295)	NM_207293	-626	4154	NM_021038	MBNL1	1.0072
chr4	6784148	6784854	3_NTT1_cutoff_0.02_peak_14653	207.1	103	1.43e-19	2.01	0.497512	UP	promoter-TSS (NM_001100590)	NM_001100590	42	9778	NM_014743	KIAA0232	1.0072
chr5	74632312	74633293	1_NT1_cutoff_0.02_peak_20668	390.1	194	2.83e-35	2.01	0.497512	UP	promoter-TSS (NM_001130996)	NM_001130996	-190	3156	NM_000859	HMGCR	1.0072
chr6	52529122	52529316	1_NT1_cutoff_0.02_peak_22149	92.4	46	1.56e-09	2.01	0.497512	UP	promoter-TSS (NR_024405)	NR_024405	20	730101	NR_024403	LOC730101	1.0072
chr6	160148986	160149183	1_NT1_cutoff_0.02_peak_22636	42.3	21	3.54e-05	2.01	0.497512	UP	promoter-TSS (NM_001322819)	NM_152857	553	9589	NM_004906	WTAP	1.0072
chr6	160211356	160211731	3_NTT1_cutoff_0.02_peak_16923	110.5	55	4.43e-11	2.01	0.497512	UP	promoter-TSS (NM_001318817)	NR_134861	-5	29074	NM_014161	MRPL18	1.0072
chr6_mann_hap4	2852629	2852819	3_NTT1_cutoff_0.02_peak_16994	30.2	15	0.000418	2.01	0.497512	UP	promoter-TSS (NR_003065).4	NR_133675	-253	106478957	NR_133674	DDX39B-AS1	1.0072
chr7	30633853	30634953	3_NTT1_cutoff_0.02_peak_17222	404.8	201	1.86e-36	2.01	0.497512	UP	promoter-TSS (NM_001316772)	NM_001316772	52	2617	NM_002047	GARS	1.0072
chr7	107384371	107385239	3_NTT1_cutoff_0.02_peak_17776	227	113	5.8e-21	2.01	0.497512	UP	promoter-TSS (NR_144540)	NR_144537	221	101927974	NR_144536	LOC101927974	1.0072
chrX	133506992	133507188	1_NT1_cutoff_0.02_peak_26843	48.3	24	1.04e-05	2.01	0.497512	UP	promoter-TSS (NM_032458)	NM_001015877	-252	84295	NM_032335	PHF6	1.0072
chr1	25558803	25560138	1_NT1_cutoff_0.02_peak_464	402.2	201	7.53e-36	2	0.5	UP	promoter-TSS (NM_015484)	NM_015484	-458	25949	NM_015484	SYF2	1
chr1	114301401	114301701	3_NTT1_cutoff_0.02_peak_1219	31.9	16	0.000567	2	0.5	UP	5' UTR (NM_001323051, exon 1 of 13)	NM_006608	226	10745	NM_006608	PHTF1	1
chr1	145515918	145516624	3_NTT1_cutoff_0.02_peak_1287	235.6	118	1.65e-21	2	0.5	UP	promoter-TSS (NR_104033)	NM_003846	106	8799	NM_003846	PEX11B	1
chr11	14541448	14542230	1_NT1_cutoff_0.02_peak_4428	249.4	125	1.08e-22	2	0.5	UP	intron (NM_148976, intron 2 of 10)	NM_001143937	152	5682	NM_002786	PSMA1	1
chr13	53191307	53191769	3_NTT1_cutoff_0.02_peak_5449	118.2	59	9.13e-12	2	0.5	UP	promoter-TSS (NM_001011725)	NM_001011724	-67	144983	NM_001011724	HNRNPA1L2	1
chr15	83654476	83655224	1_NT1_cutoff_0.02_peak_9023	236.5	118	8.23e-22	2	0.5	UP	promoter-TSS (NM_031452)	NM_031452	-105	83640	NM_031452	RAMMET	1
chr17	3571208	3572692	1_NT1_cutoff_0.02_peak_10503	697.4	348	6.23e-61	2	0.5	UP	promoter-TSS (NM_001204698)	NM_001204698	23	30851	NM_014604	TAX1BP3	1
chr17	78965626	78965869	3_NTT1_cutoff_0.02_peak_9184	69.9	35	2.53e-07	2	0.5	UP	exon (NM_024591, exon 1 of 8)	NM_024591	107	79643	NM_024591	CHMP6	1
chr18	76829303	76829614	1_NT1_cutoff_0.02_peak_12639	69.9	35	2.53e-07	2	0.5	UP	non-coding (NR_148360, exon 1 of 32)	NM_198531	184	374868	NM_198531	ATP9B	1
chr19	16178158	16178526	3_NTT1_cutoff_0.02_peak_10140	274.5	137	4.97e-25	2	0.5	UP	promoter-TSS (NM_001145160)	NM_001145160	25	7171	NM_003290	TPM4	1
chr2	65283467	65283758	1_NT1_cutoff_0.02_peak_15082	63.9	32	8.41e-07	2	0.5	UP	non-coding (NR_134966, exon 1 of 6)	NR_134966	118	23177	NM_015147	CEP68	1
chr2	66661937	66662445	3_NTT1_cutoff_0.02_peak_11364	120	60	1.24e-11	2	0.5	UP	promoter-TSS (NM_002398)	NM_002398	-341	4211	NM_002398	MEIS1	1
chr22	50781427	50781940	1_NT1_cutoff_0.02_peak_18045	189.9	95	1.33e-17	2	0.5	UP	promoter-TSS (NM_001351647)	NM_001351642	-62	9701	NM_014678	PPP6R2	1
chr3	49449004	49450062	1_NT1_cutoff_0.02_peak_18419	543.7	272	1.59e-47	2	0.5	UP	promoter-TSS (NM_022171)	NM_001313946	-3	387	NM_001664	RHOA	1
chr3	193310826	193311262	3_NTT1_cutoff_0.02_peak_14457	150.2	75	1.68e-14	2	0.5	UP	5' UTR (NM_130831, exon 1 of 28)	NM_130831	111	4976	NM_015560	OPA1	1
chr3	196668114	196668801	1_NT1_cutoff_0.02_peak_19481	101.8	51	4.35e-10	2	0.5	UP	intron (NR_046630, intron 2 of 2)	NM_001308036	853	22916	NM_007362	NCBP2	1
chr4	25314341	25314637	1_NT1_cutoff_0.02_peak_19681	94.1	47	1.05e-09	2	0.5	UP	promoter-TSS (NM_001318148)	NM_001318148	93	29063	NM_024936	ZCCHC4	1
chr5	87564373	87565014	3_NTT1_cutoff_0.02_peak_15386	217.5	109	5.56e-20	2	0.5	UP	promoter-TSS (NM_153354)	NM_001349402	2	153396	NM_153354	TMEM161B	1
chr5	177019083	177019377	1_NT1_cutoff_0.02_peak_21418	197.6	99	2.78e-18	2	0.5	UP	promoter-TSS (NM_017510)	NM_017510	81	54732	NM_017510	TMED9	1
chr6	26596787	26597386	1_NT1_cutoff_0.02_peak_21779	247.7	124	1.59e-22	2	0.5	UP	promoter-TSS (NM_013375)	NM_013375	-84	29777	NM_013375	ABT1	1
chr7	44614604	44615212	3_NTT1_cutoff_0.02_peak_17297	44	22	2.35e-05	2	0.5	UP	promoter-TSS (NM_019082)	NM_001257189	-771	54606	NM_019082	DDX56	1
chr7	99516775	99517497	1_NT1_cutoff_0.02_peak_23731	341.8	171	1.76e-30	2	0.5	UP	promoter-TSS (NM_033091)	NM_033017	87	89122	NM_033017	TRIM4	1
chr7	112090140	112091557	1_NT1_cutoff_0.02_peak_23924	547.2	273	2.69e-48	2	0.5	UP	intron (NM_001007245, intron 2 of 12)	NR_120333	286	3475	NM_001550	IFRD1	1
chr8	66546063	66546867	3_NTT1_cutoff_0.02_peak_18201	183.8	92	4.3e-17	2	0.5	UP	promoter-TSS (NM_001286702)	NM_018120	-13	55156	NM_018120	ARMC1	1
chrX	71458559	71458982	3_NTT1_cutoff_0.02_peak_19621	44	22	2.35e-05	2	0.5	UP	5' UTR (NM_017669, exon 1 of 2)	NM_017669	126	54821	NM_017669	ERCC6L	1
chr1	179850964	179852393	3_NTT1_cutoff_0.02_peak_1896	567.9	285	4.1e-49	1.99	0.502513	UP	exon (NM_001267578, exon 1 of 10)	NM_001267578	502	26092	NM_015602	TOR1AIP1	0.992768
chr10	25013452	25013734	3_NTT1_cutoff_0.02_peak_2595	39.7	20	0.000109	1.99	0.502513	UP	promoter-TSS (NM_020824)	NM_020824	-996	57584	NM_020824	ARHGAP21	0.992768
chr10	73610551	73611368	3_NTT1_cutoff_0.02_peak_2805	258.9	130	3.06e-23	1.99	0.502513	UP	exon (NM_001042466, exon 1 of 14)	NM_001042465	172	5660	NM_002778	PSAP	0.992768
chr12	110887920	110888396	1_NT1_cutoff_0.02_peak_6844	248.6	125	2.15e-22	1.99	0.502513	UP	promoter-TSS (NM_001278556)	NM_001278556	58	10094	NM_001278556	ARPC3	0.992768
chr13	76210103	76210496	3_NTT1_cutoff_0.02_peak_5481	39.7	20	0.000109	1.99	0.502513	UP	promoter-TSS (NM_001306080)	NM_001306080	-124	4008	NM_005358	LMO7	0.992768
chr14	39583171	39583815	1_NT1_cutoff_0.02_peak_7872	183	92	8.6e-17	1.99	0.502513	UP	promoter-TSS (NM_003616)	NM_003616	5	8487	NM_003616	GEMIN2	0.992768
chr15	44116694	44117131	1_NT1_cutoff_0.02_peak_8649	129.5	65	1.73e-12	1.99	0.502513	UP	promoter-TSS (NM_005926)	NM_005926	38	4236	NM_005926	MFAP1	0.992768
chr16	4897057	4897902	1_NT1_cutoff_0.02_peak_9532	240.8	121	1.02e-21	1.99	0.502513	UP	promoter-TSS (NR_136695)	NM_001324098	-91	84656	NM_032569	GLYR1	0.992768
chr16	22019170	22019739	1_NT1_cutoff_0.02_peak_9681	214.9	108	1.64e-19	1.99	0.502513	UP	promoter-TSS (NM_001164579)	NM_001164579	-1	730094	NM_173501	MOSMO	0.992768
chr16	23689881	23690443	3_NTT1_cutoff_0.02_peak_7410	99.3	50	6.46e-10	1.99	0.502513	UP	promoter-TSS (NM_005030)	NM_005030	69	5347	NM_005030	PLK1	0.992768
chr16	56485005	56485693	1_NT1_cutoff_0.02_peak_9952	204.6	103	1.16e-18	1.99	0.502513	UP	promoter-TSS (NM_018233)	NM_001324363	-43	55239	NM_018233	OGFOD1	0.992768
chr17	56160643	56161086	1_NT1_cutoff_0.02_peak_11687	335.7	169	1.53e-29	1.99	0.502513	UP	promoter-TSS (NM_080677)	NM_080677	85	140735	NM_080677	DYNLL2	0.992768
chr17	65362491	65362995	1_NT1_cutoff_0.02_peak_11814	201.1	101	1.27e-18	1.99	0.502513	UP	promoter-TSS (NM_002816)	NM_174871	0	5718	NM_002816	PSMD12	0.992768
chr19	41283954	41284291	3_NTT1_cutoff_0.02_peak_10487	51.8	26	9.44e-06	1.99	0.502513	UP	promoter-TSS (NM_016154)	NM_016154	-1	53916	NM_016154	RAB4B	0.992768
chr2	46524456	46524822	3_NTT1_cutoff_0.02_peak_11208	85.4	43	1.04e-08	1.99	0.502513	UP	promoter-TSS (NM_001430)	NM_001430	98	2034	NM_001430	EPAS1	0.992768
chr2	197664191	197664642	1_NT1_cutoff_0.02_peak_15825	131.2	66	1.17e-12	1.99	0.502513	UP	promoter-TSS (NM_012086)	NM_001206774	75	9330	NM_012086	GTF3C3	0.992768
chr22	41865004	41865425	1_NT1_cutoff_0.02_peak_17863	115.7	58	2.73e-11	1.99	0.502513	UP	promoter-TSS (NM_032758)	NM_001098	86	50	NM_001098	ACO2	0.992768
chr3	33482309	33482808	3_NTT1_cutoff_0.02_peak_13592	143.3	72	1.1e-13	1.99	0.502513	UP	promoter-TSS (NM_014517)	NM_001128161	-662	7342	NM_014517	UBP1	0.992768
chr3	127770694	127771715	1_NT1_cutoff_0.02_peak_18848	340.1	171	3.53e-30	1.99	0.502513	UP	promoter-TSS (NM_013336)	NM_013336	-7	29927	NM_013336	SEC61A1	0.992768
chr3	183602362	183602860	3_NTT1_cutoff_0.02_peak_14387	230.4	116	7.22e-21	1.99	0.502513	UP	promoter-TSS (NM_001324438)	NM_001324437	85	55486	NM_018622	PARL	0.992768
chr7	73097586	73098155	1_NT1_cutoff_0.02_peak_23515	288.3	145	8.81e-26	1.99	0.502513	UP	promoter-TSS (NM_017528)	NR_045512	-27	114049	NM_017528	BUD23	0.992768
chr7	158649186	158649508	1_NT1_cutoff_0.02_peak_24265	71.6	36	1.69e-07	1.99	0.502513	UP	promoter-TSS (NM_001350915)	NM_001350918	78	55112	NM_018051	WDR60	0.992768
chr9	34376726	34376972	1_NT1_cutoff_0.02_peak_25457	39.7	20	0.000109	1.99	0.502513	UP	promoter-TSS (NM_020702)	NM_020702	45	57462	NM_020702	MYORG	0.992768
chr1	204380387	204381426	1_NT1_cutoff_0.02_peak_2536	543.7	274	1.16e-46	1.98	0.505051	UP	promoter-TSS (NM_032833)	NM_032833	38	84919	NM_032833	PPP1R15B	0.9855
chr10	6130891	6131248	1_NT1_cutoff_0.02_peak_3082	146.7	74	1e-13	1.98	0.505051	UP	promoter-TSS (NM_001145547)	NM_032905	121	84991	NM_032905	RBM17	0.9855
chr10	27792802	27793705	1_NT1_cutoff_0.02_peak_3220	209.7	106	7.15e-19	1.98	0.505051	UP	non-coding (NR_046172, exon 1 of 6)	NM_001256411	151	22931	NM_021252	RAB18	0.9855
chr11	62598900	62599215	3_NTT1_cutoff_0.02_peak_3600	33.7	17	0.000375	1.98	0.505051	UP	promoter-TSS (NR_135084)	NM_001244666	505	6811	NM_003164	STX5	0.9855
chr11	129939643	129940005	1_NT1_cutoff_0.02_peak_5550	209.7	106	7.15e-19	1.98	0.505051	UP	promoter-TSS (NM_001243299)	NM_001142276	108	334	NM_001642	APLP2	0.9855
chr14	90863026	90863683	3_NTT1_cutoff_0.02_peak_6196	569.6	287	7.47e-49	1.98	0.505051	UP	promoter-TSS (NM_006888)	NM_006888	28	801	NM_006888	CALM1	0.9855
chr16	8962477	8962965	1_NT1_cutoff_0.02_peak_9549	142.4	72	2.2e-13	1.98	0.505051	UP	promoter-TSS (NM_001278261)	NM_001278261	-145	23589	NM_014316	CARHSP1	0.9855
chr19	39390173	39390437	1_NT1_cutoff_0.02_peak_13855	47.5	24	2.12e-05	1.98	0.505051	UP	promoter-TSS (NR_040515)	NM_001243116	-35	4793	NM_002503	NFKBIB	0.9855
chr19	58662040	58662243	3_NTT1_cutoff_0.02_peak_10940	47.5	24	2.12e-05	1.98	0.505051	UP	promoter-TSS (NM_024620)	NM_024620	6	79673	NM_024620	ZNF329	0.9855
chr2	20251298	20251568	3_NTT1_cutoff_0.02_peak_11063	81.1	41	2.3e-08	1.98	0.505051	UP	5' UTR (NM_014713, exon 1 of 7)	NM_014713	356	9741	NM_014713	LAPTM4A	0.9855
chr2	74684578	74685774	1_NT1_cutoff_0.02_peak_15173	200.2	101	2.54e-18	1.98	0.505051	UP	promoter-TSS (NM_012477)	NM_012477	-351	23559	NM_012477	WBP1	0.9855
chr2	148778116	148778358	1_NT1_cutoff_0.02_peak_15530	113.1	57	4.05e-11	1.98	0.505051	UP	promoter-TSS (NM_001190881)	NM_001190882	69	5000	NM_002552	ORC4	0.9855
chr20	43976639	43977235	1_NT1_cutoff_0.02_peak_16775	501.5	253	4.02e-43	1.98	0.505051	UP	intron (NM_002999, intron 1 of 4)	NM_002999	127	6385	NM_002999	SDC4	0.9855
chr22	38597857	38598621	3_NTT1_cutoff_0.02_peak_13202	249.4	126	2.9e-22	1.98	0.505051	UP	promoter-TSS (NM_001161573)	NM_012323	300	23764	NM_012323	MAFF	0.9855
chr22	41215226	41215717	3_NTT1_cutoff_0.02_peak_13268	136.4	69	7.16e-13	1.98	0.505051	UP	promoter-TSS (NM_006358)	NM_001282726	-69	10478	NM_006358	SLC25A17	0.9855
chr3	87276131	87276665	1_NT1_cutoff_0.02_peak_18681	107	54	1.33e-10	1.98	0.505051	UP	promoter-TSS (NM_001244644)	NM_001244644	-15	25978	NM_014043	CHMP2B	0.9855
chr6	161412685	161412983	3_NTT1_cutoff_0.02_peak_16926	75.1	38	7.62e-08	1.98	0.505051	UP	promoter-TSS (NM_001291958)	NM_001291958	75	4216	NM_005922	MAP3K4	0.9855
chr6_qbl_hap6	2927283	2927661	3_NTT1_cutoff_0.02_peak_17018	33.7	17	0.000375	1.98	0.505051	UP	promoter-TSS (NM_033177).6	NM_001282385	172	1460	NM_001320	CSNK2B	0.9855
chr7	102984971	102985438	1_NT1_cutoff_0.02_peak_23860	156.2	79	1.41e-14	1.98	0.505051	UP	5' UTR (NM_001129887, exon 1 of 15)	NM_014377	115	27000	NM_014377	DNAJC2	0.9855
chr8	124253372	124253817	1_NT1_cutoff_0.02_peak_24892	176.1	89	2.79e-16	1.98	0.505051	UP	promoter-TSS (NM_032847)	NM_032847	43	84933	NM_032847	C8orf76	0.9855
chr9	125666758	125668035	1_NT1_cutoff_0.02_peak_25962	345.2	174	2.19e-30	1.98	0.505051	UP	5' UTR (NM_001354486, exon 1 of 10)	NM_001354482	233	54542	NM_018835	RC3H2	0.9855
chr1	20960081	20960271	3_NTT1_cutoff_0.02_peak_232	27.6	14	0.00131	1.97	0.507614	UP	promoter-TSS (NR_106732)	NR_106732	4	102464833	NR_106732	MIR6084	0.978196
chr1	151020795	151021314	3_NTT1_cutoff_0.02_peak_1413	130.3	66	2.33e-12	1.97	0.507614	UP	TTS (NM_001159642)	NM_017860	839	54964	NM_017860	C1orf56	0.978196
chr10	14880161	14880518	1_NT1_cutoff_0.02_peak_3148	153.6	78	4.14e-14	1.97	0.507614	UP	promoter-TSS (NM_001029954)	NM_001278205	181	51182	NM_016299	HSPA14	0.978196
chr10	60094602	60095021	1_NT1_cutoff_0.02_peak_3431	159.7	81	1.28e-14	1.97	0.507614	UP	promoter-TSS (NM_001204880)	NM_001204880	73	7321	NM_003338	UBE2D1	0.978196
chr10	99205581	99206402	1_NT1_cutoff_0.02_peak_3728	171.8	87	1.21e-15	1.97	0.507614	UP	promoter-TSS (NM_001318366)	NM_198046	104	84287	NM_032327	ZDHHC16	0.978196
chr12	104458236	104458599	3_NTT1_cutoff_0.02_peak_4866	76.8	39	1.02e-07	1.97	0.507614	UP	promoter-TSS (NM_001316967)	NM_013320	182	29915	NM_013320	HCFC2	0.978196
chr13	73355826	73356479	1_NT1_cutoff_0.02_peak_7393	238.2	121	4.05e-21	1.97	0.507614	UP	promoter-TSS (NR_146206)	NR_146206	-8	10464	NM_006346	PIBF1	0.978196
chr13	79233029	79233413	1_NT1_cutoff_0.02_peak_7429	84.6	43	2.08e-08	1.97	0.507614	UP	promoter-TSS (NM_024546)	NM_024546	93	79596	NM_024546	RNF219	0.978196
chr14	36789928	36790153	1_NT1_cutoff_0.02_peak_7866	41.4	21	7.22e-05	1.97	0.507614	UP	promoter-TSS (NM_001308110)	NM_001308110	-159	51562	NM_016586	MBIP	0.978196
chr16	740191	740524	1_NT1_cutoff_0.02_peak_9296	138.1	70	4.83e-13	1.97	0.507614	UP	promoter-TSS (NM_032259)	NM_032259	66	84219	NM_032259	WDR24	0.978196
chr16	11038292	11038592	1_NT1_cutoff_0.02_peak_9559	69	35	2.53e-07	1.97	0.507614	UP	promoter-TSS (NM_015226)	NM_001243403	97	23274	NM_015226	CLEC16A	0.978196
chr16	47494693	47495466	3_NTT1_cutoff_0.02_peak_7580	315.9	160	2.01e-27	1.97	0.507614	UP	promoter-TSS (NM_001031835)	NM_001305002	105	81533	NM_030790	ITFG1	0.978196
chr17	57785600	57785803	3_NTT1_cutoff_0.02_peak_8878	13.8	7	0.027	1.97	0.507614	UP	promoter-TSS (NM_016077)	NM_001015509	-743	51651	NM_016077	PTRH2	0.978196
chr19	57999058	57999331	1_NT1_cutoff_0.02_peak_14506	118.2	60	2.48e-11	1.97	0.507614	UP	5' UTR (NM_001098492, exon 1 of 4)	NM_024691	116	79744	NM_024691	ZNF419	0.978196
chr2	99952365	99953219	1_NT1_cutoff_0.02_peak_15313	303.8	154	2.07e-26	1.97	0.507614	UP	promoter-TSS (NM_005783)	NM_005783	68	10190	NM_005783	TXNDC9	0.978196
chr20	43514243	43514830	1_NT1_cutoff_0.02_peak_16756	236.5	120	5.98e-21	1.97	0.507614	UP	intron (NM_139323, intron 1 of 5)	NM_003404	297	7529	NM_003404	YWHAB	0.978196
chr3	119812529	119813465	1_NT1_cutoff_0.02_peak_18793	239.9	122	5.41e-21	1.97	0.507614	UP	5' UTR (NM_002093, exon 1 of 12)	NM_001354596	267	2932	NM_002093	GSK3B	0.978196
chr5	16465703	16466542	1_NT1_cutoff_0.02_peak_20397	327.1	166	1.94e-28	1.97	0.507614	UP	promoter-TSS (NM_033414)	NM_033414	-229	90441	NM_033414	ZNF622	0.978196
chr5	176433169	176434070	1_NT1_cutoff_0.02_peak_21383	400.5	203	2.17e-34	1.97	0.507614	UP	promoter-TSS (NM_016290)	NM_001317961	175	51720	NM_016290	UIMC1	0.978196
chr7	100076614	100076937	1_NT1_cutoff_0.02_peak_23769	63	32	8.41e-07	1.97	0.507614	UP	non-coding (NR_130118, exon 1 of 5)	NR_130118	126	81628	NM_030935	TSC22D4	0.978196
chr1	1333612	1333988	3_NTT1_cutoff_0.02_peak_27	58.7	30	3.75e-06	1.96	0.510204	UP	promoter-TSS (NM_001350497)	NM_001350497	-78	81669	NM_030937	CCNL2	0.970854
chr1	42921929	42922679	3_NTT1_cutoff_0.02_peak_658	291.7	149	5.64e-25	1.96	0.510204	UP	promoter-TSS (NM_001146192)	NM_001287509	139	79717	NM_024664	PPCS	0.970854
chr1	110090820	110091742	1_NT1_cutoff_0.02_peak_1479	368.5	188	2.86e-31	1.96	0.510204	UP	promoter-TSS (NM_006496)	NM_006496	95	2773	NM_006496	GNAI3	0.970854
chr1	155292711	155293228	1_NT1_cutoff_0.02_peak_1947	95.8	49	3.8e-09	1.96	0.510204	UP	promoter-TSS (NM_001105205)	NR_145425	666	284618	NM_173639	RUSC1-AS1	0.970854
chr1	155990423	155990849	1_NT1_cutoff_0.02_peak_2003	137.2	70	9.59e-13	1.96	0.510204	UP	intron (NM_003145, intron 1 of 5)	NM_003145	122	6746	NM_003145	SSR2	0.970854
chr1	161014930	161016175	1_NT1_cutoff_0.02_peak_2146	415.1	212	5.03e-35	1.96	0.510204	UP	promoter-TSS (NM_001276373)	NM_007122	216	7391	NM_007122	USF1	0.970854
chr1	181002758	181003310	1_NT1_cutoff_0.02_peak_2315	80.3	41	4.6e-08	1.96	0.510204	UP	5' UTR (NM_001531, exon 2 of 7)	NM_001195035	473	3140	NM_001531	MR1	0.970854
chr10	105127388	105127935	3_NTT1_cutoff_0.02_peak_3058	149.3	76	9.08e-14	1.96	0.510204	UP	promoter-TSS (NM_006951)	NM_139052	-48	6877	NM_006951	TAF5	0.970854
chr12	123868597	123868905	3_NTT1_cutoff_0.02_peak_5107	29.3	15	0.000861	1.96	0.510204	UP	promoter-TSS (NR_136910)	NM_001324504	88	387893	NM_020382	KMT5A	0.970854
chr17	16118674	16119298	1_NT1_cutoff_0.02_peak_10776	328.8	168	6.82e-28	1.96	0.510204	UP	promoter-TSS (NM_006311)	NM_006311	-112	9611	NM_006311	NCOR1	0.970854
chr19	1020824	1021292	1_NT1_cutoff_0.02_peak_12712	240.8	123	7.21e-21	1.96	0.510204	UP	promoter-TSS (NR_125730).7	NM_033420	83	91304	NM_033420	TMEM259	0.970854
chr2	27255536	27256037	1_NT1_cutoff_0.02_peak_14759	180.4	92	3.39e-16	1.96	0.510204	UP	promoter-TSS (NM_001083590)	NM_017727	13	54867	NM_017727	TMEM214	0.970854
chr20	5986309	5987009	1_NT1_cutoff_0.02_peak_16360	327.1	167	5.12e-28	1.96	0.510204	UP	promoter-TSS (NM_001323562)	NR_136617	-60	54675	NM_019095	CRLS1	0.970854
chr4	119512785	119513165	3_NTT1_cutoff_0.02_peak_14958	158.8	81	2.52e-14	1.96	0.510204	UP	promoter-TSS (NR_109983)	NR_109983	76	729218	NR_103825	LOC729218	0.970854
chr5	37379333	37379590	1_NT1_cutoff_0.02_peak_20447	94.1	48	2.85e-09	1.96	0.510204	UP	promoter-TSS (NM_001345999)	NM_001345998	100	55100	NM_018034	WDR70	0.970854
chr5	52856375	52857009	1_NT1_cutoff_0.02_peak_20507	121.7	62	2.24e-11	1.96	0.510204	UP	intron (NM_002495, intron 1 of 4)	NM_001318051	229	4724	NM_002495	NDUFS4	0.970854
chr5	64064214	64064629	1_NT1_cutoff_0.02_peak_20557	115.7	59	7.3e-11	1.96	0.510204	UP	promoter-TSS (NM_173829)	NM_173829	74	285672	NM_173829	SREK1IP1	0.970854
chr5	64858730	64859305	1_NT1_cutoff_0.02_peak_20564	168.3	86	3.55e-15	1.96	0.510204	UP	promoter-TSS (NM_001278927)	NM_022145	-23	64105	NM_022145	CENPK	0.970854
chr5	133560848	133562712	1_NT1_cutoff_0.02_peak_20902	789.7	402	2.97e-65	1.96	0.510204	UP	promoter-TSS (NM_001355019)	NM_002715	170	5515	NM_002715	PPP2CA	0.970854
chr6	36646148	36646872	3_NTT1_cutoff_0.02_peak_16426	404.8	207	6.87e-34	1.96	0.510204	UP	promoter-TSS (NM_001220778)	NM_001220778	23	1026	NM_000389	CDKN1A	0.970854
chr6	36853725	36853916	1_NT1_cutoff_0.02_peak_21980	50.9	26	1.89e-05	1.96	0.510204	UP	intron (NM_152734, intron 1 of 7)	NM_001286637	181	221477	NM_152734	C6orf89	0.970854
chr6	166755498	166756581	3_NTT1_cutoff_0.02_peak_16930	504.9	258	6.72e-42	1.96	0.510204	UP	promoter-TSS (NM_145169)	NR_130114	54	113402	NM_145169	SFT2D1	0.970854
chr7	4814882	4815471	3_NTT1_cutoff_0.02_peak_17079	221	113	3.57e-19	1.96	0.510204	UP	promoter-TSS (NM_014855)	NM_014855	-85	9907	NM_014855	AP5Z1	0.970854
chr7	150929321	150929984	1_NT1_cutoff_0.02_peak_24226	234.8	120	2.32e-20	1.96	0.510204	UP	promoter-TSS (NM_019015)	NM_019015	78	54480	NM_019015	CHPF2	0.970854
chr9	26946990	26948012	1_NT1_cutoff_0.02_peak_25385	200.2	102	6.77e-18	1.96	0.510204	UP	promoter-TSS (NM_001321546)	NM_001321546	-30	9373	NM_004253	PLAA	0.970854
chr9	33264909	33265211	1_NT1_cutoff_0.02_peak_25434	107.9	55	3.54e-10	1.96	0.510204	UP	promoter-TSS (NM_004323)	NM_001195536	183	51510	NM_016410	CHMP5	0.970854
chr1	16693621	16694372	1_NT1_cutoff_0.02_peak_339	244.3	125	3.3e-21	1.95	0.512821	UP	intron (NR_073500, intron 1 of 1)	NR_073501	472	26099	NM_001114600	SZRD1	0.963474
chr1	25071752	25072129	1_NT1_cutoff_0.02_peak_463	107	55	3.54e-10	1.95	0.512821	UP	5' UTR (NM_013943, exon 1 of 6)	NM_013943	181	25932	NM_013943	CLIC4	0.963474
chr1	40997001	40997514	1_NT1_cutoff_0.02_peak_876	126.9	65	1.35e-11	1.95	0.512821	UP	promoter-TSS (NM_152373)	NM_152373	25	127396	NM_152373	ZNF684	0.963474
chr1	115300134	115300960	1_NT1_cutoff_0.02_peak_1535	366.8	188	1.1e-30	1.95	0.512821	UP	5' UTR (NM_001242893, exon 1 of 18)	NM_001242892	124	7812	NM_007158	CSDE1	0.963474
chr1	236686992	236687420	1_NT1_cutoff_0.02_peak_2921	214	110	1.15e-18	1.95	0.512821	UP	non-coding (NR_034040, exon 1 of 1)	NM_201544	179	3964	NM_006499	LGALS8	0.963474
chr10	70939882	70940180	1_NT1_cutoff_0.02_peak_3517	91.5	47	8.39e-09	1.95	0.512821	UP	promoter-TSS (NM_001323584)	NM_001323586	71	6832	NM_003171	SUPV3L1	0.963474
chr12	69863903	69864357	1_NT1_cutoff_0.02_peak_6608	170	87	2.4e-15	1.95	0.512821	UP	promoter-TSS (NM_001278355)	NM_001042555	1	10818	NM_006654	FRS2	0.963474
chr12	80328607	80329380	1_NT1_cutoff_0.02_peak_6658	324.5	166	1.48e-27	1.95	0.512821	UP	promoter-TSS (NR_146533)	NM_002480	-16	4659	NM_002480	PPP1R12A	0.963474
chr12	117628114	117628414	3_NTT1_cutoff_0.02_peak_4978	111.3	57	1.61e-10	1.95	0.512821	UP	promoter-TSS (NM_033624)	NM_033624	36	23014	NM_015002	FBXO21	0.963474
chr13	111805506	111806487	3_NTT1_cutoff_0.02_peak_5553	345.2	177	4.04e-29	1.95	0.512821	UP	promoter-TSS (NM_001320851)	NM_001354050	3	8874	NM_003899	ARHGEF7	0.963474
chr14	76126997	76127302	3_NTT1_cutoff_0.02_peak_6150	74.2	38	1.52e-07	1.95	0.512821	UP	promoter-TSS (NM_015072)	NM_007176	388	11161	NM_007176	ERG28	0.963474
chr15	52263804	52264269	1_NT1_cutoff_0.02_peak_8709	162.3	83	1.15e-14	1.95	0.512821	UP	promoter-TSS (NM_001323903)	NM_001323904	-39	123169	NM_138792	LEO1	0.963474
chr16	9057589	9058045	1_NT1_cutoff_0.02_peak_9550	111.3	57	1.61e-10	1.95	0.512821	UP	promoter-TSS (NM_003470)	NM_003470	-476	7874	NM_003470	USP7	0.963474
chr17	61904255	61904600	1_NT1_cutoff_0.02_peak_11772	185.6	95	2.06e-16	1.95	0.512821	UP	promoter-TSS (NM_001199163)	NM_002805	-342	5705	NM_002805	PSMC5	0.963474
chr19	507326	507644	3_NTT1_cutoff_0.02_peak_9576	134.6	69	2.8e-12	1.95	0.512821	UP	promoter-TSS (NM_033513)	NM_033513	-12	91978	NM_033513	TPGS1	0.963474
chr19	10513977	10514343	1_NT1_cutoff_0.02_peak_13190	210.6	108	2.51e-18	1.95	0.512821	UP	promoter-TSS (NR_031592)	NR_031592	54	100302213	NR_031592	MIR1181	0.963474
chr19	16582560	16583073	3_NTT1_cutoff_0.02_peak_10148	162.3	83	1.15e-14	1.95	0.512821	UP	promoter-TSS (NM_001258374)	NM_001258374	6	58513	NM_021235	EPS15L1	0.963474
chr19	19431082	19431409	1_NT1_cutoff_0.02_peak_13604	120.8	62	4.4e-11	1.95	0.512821	UP	promoter-TSS (NM_015329)	NM_172231	75	57794	NM_021164	SUGP1	0.963474
chr20	3140234	3140674	3_NTT1_cutoff_0.02_peak_12298	207.1	106	2.79e-18	1.95	0.512821	UP	promoter-TSS (NM_021826)	NM_021826	78	60493	NM_021826	FASTKD5	0.963474
chr20	34204080	34204337	3_NTT1_cutoff_0.02_peak_12464	52.6	27	1.26e-05	1.95	0.512821	UP	exon (NM_003116, exon 1 of 12)	NM_001317931	403	6676	NM_003116	SPAG4	0.963474
chr20	34287051	34288221	3_NTT1_cutoff_0.02_peak_12475	457.4	234	3.79e-38	1.95	0.512821	UP	promoter-TSS (NR_037570)	NM_021100	-349	9054	NM_021100	NFS1	0.963474
chr20	62205408	62205713	1_NT1_cutoff_0.02_peak_17003	76	39	2.02e-07	1.95	0.512821	UP	promoter-TSS (NM_001037335)	NM_001037335	31	85441	NM_033405	HELZ2	0.963474
chr22	19466528	19466797	1_NT1_cutoff_0.02_peak_17380	99.3	51	1.72e-09	1.95	0.512821	UP	promoter-TSS (NM_003504)	NM_005659	75	7353	NM_005659	UFD1	0.963474
chr3	179065153	179065744	1_NT1_cutoff_0.02_peak_19246	156.2	80	3.73e-14	1.95	0.512821	UP	promoter-TSS (NM_033540)	NM_033540	-31	55669	NM_017927	MFN1	0.963474
chr3	195163529	195163861	1_NT1_cutoff_0.02_peak_19430	122.6	63	2.97e-11	1.95	0.512821	UP	5' UTR (NM_012287, exon 1 of 23)	NM_012287	122	23527	NM_012287	ACAP2	0.963474
chr4	107236587	107237484	1_NT1_cutoff_0.02_peak_20007	325.4	167	1.97e-27	1.95	0.512821	UP	promoter-TSS (NM_001142416)	NM_004757	183	9255	NM_004757	AIMP1	0.963474
chr6	7312794	7313790	3_NTT1_cutoff_0.02_peak_16132	328.8	169	1.77e-27	1.95	0.512821	UP	exon (NM_001292008, exon 1 of 8)	NM_001292008	255	6745	NM_003144	SSR1	0.963474
chr6	106534131	106534343	3_NTT1_cutoff_0.02_peak_16710	37.1	19	0.000164	1.95	0.512821	UP	promoter-TSS (NM_001198)	NM_001198	42	639	NM_001198	PRDM1	0.963474
chr8	37619684	37620316	3_NTT1_cutoff_0.02_peak_18104	214.9	110	1.15e-18	1.95	0.512821	UP	promoter-TSS (NM_001349346)	NM_001349349	-64	11212	NM_007198	PLPBP	0.963474
chr1	47780051	47780340	1_NT1_cutoff_0.02_peak_1074	133.8	69	5.48e-12	1.94	0.515464	UP	promoter-TSS (NM_003035)	NM_001282937	-377	6491	NM_003035	STIL	0.956057
chr1	112938449	112938978	3_NTT1_cutoff_0.02_peak_1196	135.5	70	3.7e-12	1.94	0.515464	UP	promoter-TSS (NM_018704)	NM_018704	-86	55917	NM_018704	CTTNBP2NL	0.956057
chr1	225965383	225966450	1_NT1_cutoff_0.02_peak_2742	507.5	262	4.02e-41	1.94	0.515464	UP	intron (NM_003133, intron 1 of 2)	NM_003133	402	6726	NM_003133	SRP9	0.956057
chr10	112063969	112065124	3_NTT1_cutoff_0.02_peak_3086	286.5	148	6.2e-24	1.94	0.515464	UP	5' UTR (NM_005871, exon 1 of 6)	NM_005871	160	10285	NM_005871	SMNDC1	0.956057
chr13	33112693	33113241	1_NT1_cutoff_0.02_peak_7247	120	62	8.59e-11	1.94	0.515464	UP	promoter-TSS (NM_001278432)	NM_001320836	-35	10443	NM_014887	N4BP2L2	0.956057
chr13	113951305	113951837	3_NTT1_cutoff_0.02_peak_5558	178.7	92	1.3e-15	1.94	0.515464	UP	5' UTR (NM_005561, exon 1 of 9)	NM_005561	102	3916	NM_005561	LAMP1	0.956057
chr14	54907788	54908267	1_NT1_cutoff_0.02_peak_7967	126	65	1.35e-11	1.94	0.515464	UP	exon (NM_005776, exon 1 of 5)	NM_005776	120	10175	NM_005776	CNIH1	0.956057
chr17	9478972	9479288	3_NTT1_cutoff_0.02_peak_8172	63.9	33	2.21e-06	1.94	0.515464	UP	promoter-TSS (NM_001080556)	NM_004853	145	9482	NM_004853	STX8	0.956057
chr17	36452936	36453347	3_NTT1_cutoff_0.02_peak_8516	164.9	85	2.02e-14	1.94	0.515464	UP	5' UTR (NM_001278279, exon 1 of 7)	NM_032351	153	84311	NM_032351	MRPL45	0.956057
chr17	73266155	73266345	3_NTT1_cutoff_0.02_peak_9102	31.1	16	0.000567	1.94	0.515464	UP	promoter-TSS (NM_001242501)	NM_001242501	76	57409	NM_020679	MIF4GD	0.956057
chr19	42746367	42747276	1_NT1_cutoff_0.02_peak_13961	369.4	190	9.89e-31	1.94	0.515464	UP	promoter-TSS (NM_019884)	NM_019884	-86	2931	NM_019884	GSK3A	0.956057
chr19	45458100	45458900	3_NTT1_cutoff_0.02_peak_10578	472.1	243	8.61e-39	1.94	0.515464	UP	promoter-TSS (NM_001294)	NM_001294	19	1209	NM_001294	CLPTM1	0.956057
chr19	55916841	55919525	1_NT1_cutoff_0.02_peak_14453	1083.2	557	1.24e-86	1.94	0.515464	UP	exon (NM_014501, exon 2 of 4)	NM_014501	1142	27338	NM_014501	UBE2S	0.956057
chr2	42588151	42588496	1_NT1_cutoff_0.02_peak_14925	101	52	2.27e-09	1.94	0.515464	UP	promoter-TSS (NR_134947)	NR_134947	59	9167	NM_004718	COX7A2L	0.956057
chr2	60983251	60983742	1_NT1_cutoff_0.02_peak_15033	94.9	49	7.44e-09	1.94	0.515464	UP	5' UTR (NM_022894, exon 1 of 22)	NM_022894	132	64895	NM_022894	PAPOLG	0.956057
chr2	128785452	128785776	3_NTT1_cutoff_0.02_peak_11657	31.1	16	0.000567	1.94	0.515464	UP	promoter-TSS (NM_001145928)	NM_001330299	80	79595	NM_024545	SAP130	0.956057
chr21	34923953	34924110	1_NT1_cutoff_0.02_peak_17132	31.1	16	0.000567	1.94	0.515464	UP	TTS (NR_106756)	NR_106756	1064	102465248	NR_106756	MIR6501	0.956057
chr22	31364815	31365500	1_NT1_cutoff_0.02_peak_17586	291.7	150	1.46e-24	1.94	0.515464	UP	promoter-TSS (NM_001303256)	NR_110493	-39	55000	NR_002323	TUG1	0.956057
chr4	109571661	109572119	1_NT1_cutoff_0.02_peak_20025	126	65	1.35e-11	1.94	0.515464	UP	exon (NM_001267818, exon 1 of 5)	NM_021227	149	58505	NM_021227	OSTC	0.956057
chr5	36876100	36876261	1_NT1_cutoff_0.02_peak_20443	31.1	16	0.000567	1.94	0.515464	UP	promoter-TSS (NM_015384)	NR_046262	615	646719	NR_046262	NIPBL-DT	0.956057
chr5	178053552	178054456	1_NT1_cutoff_0.02_peak_21444	303.8	157	3.64e-25	1.94	0.515464	UP	promoter-TSS (NM_020666)	NM_020666	50	57396	NM_020666	CLK4	0.956057
chr7	32529833	32530277	1_NT1_cutoff_0.02_peak_23244	102.7	53	1.53e-09	1.94	0.515464	UP	promoter-TSS (NM_012322)	NM_012322	-32	23658	NM_012322	LSM5	0.956057
chr7	91874706	91875585	1_NT1_cutoff_0.02_peak_23648	217.5	112	1.03e-18	1.94	0.515464	UP	promoter-TSS (NM_019004)	NM_194455	268	889	NM_004912	KRIT1	0.956057
chr8	23315012	23315266	3_NTT1_cutoff_0.02_peak_18058	94.9	49	7.44e-09	1.94	0.515464	UP	5' UTR (NM_004901, exon 1 of 13)	NM_004901	105	9583	NM_004901	ENTPD4	0.956057
chr8	121457165	121457514	1_NT1_cutoff_0.02_peak_24881	149.3	77	2.37e-13	1.94	0.515464	UP	promoter-TSS (NM_022045)	NM_022045	-298	27085	NM_022045	MTBP	0.956057
chr8	134309292	134309716	3_NTT1_cutoff_0.02_peak_18509	348.7	180	9.34e-29	1.94	0.515464	UP	promoter-TSS (NM_006096)	NM_001258432	43	10397	NM_006096	NDRG1	0.956057
chrX	103401498	103401774	1_NT1_cutoff_0.02_peak_26752	54.4	28	8.4e-06	1.94	0.515464	UP	promoter-TSS (NM_001012755)	NM_001012755	72	401612	NM_001012755	SLC25A53	0.956057
chr1	1822335	1822745	3_NTT1_cutoff_0.02_peak_54	218.4	113	1.36e-18	1.93	0.518135	UP	promoter-TSS (NM_002074)	NM_002074	16	2782	NM_002074	GNB1	0.948601
chr1	109419475	109420033	3_NTT1_cutoff_0.02_peak_1139	90.6	47	1.64e-08	1.93	0.518135	UP	5' UTR (NM_001321039, exon 1 of 16)	NM_001321039	151	29899	NM_013296	GPSM2	0.948601
chr11	2721046	2721351	3_NTT1_cutoff_0.02_peak_3233	121.7	63	5.8e-11	1.93	0.518135	UP	promoter-TSS (NR_002728)	NR_002728	29	10984	NR_002728	KCNQ1OT1	0.948601
chr12	112123542	112124102	1_NT1_cutoff_0.02_peak_6862	309	160	2.2e-25	1.93	0.518135	UP	promoter-TSS (NM_006768)	NM_006768	-22	8315	NM_006768	BRAP	0.948601
chr15	52971443	52971674	3_NTT1_cutoff_0.02_peak_6565	48.3	25	2.83e-05	1.93	0.518135	UP	promoter-TSS (NM_019600)	NR_104457	-728	56204	NM_019600	FAM214A	0.948601
chr15	64995167	64995628	3_NTT1_cutoff_0.02_peak_6639	115.7	60	1.89e-10	1.93	0.518135	UP	promoter-TSS (NM_002537)	NM_001301302	82	4947	NM_002537	OAZ2	0.948601
chr15	76603080	76603402	3_NTT1_cutoff_0.02_peak_6796	40.6	21	0.000144	1.93	0.518135	UP	intron (NM_000126, intron 1 of 11)	NM_000126	569	2108	NM_000126	ETFA	0.948601
chr16	9184905	9185980	3_NTT1_cutoff_0.02_peak_7280	427.2	221	8.46e-35	1.93	0.518135	UP	promoter-TSS (NM_014117)	NM_014117	-94	29035	NM_014117	C16orf72	0.948601
chr16	48644008	48644237	3_NTT1_cutoff_0.02_peak_7587	104.4	54	1.03e-09	1.93	0.518135	UP	promoter-TSS (NM_153029)	NM_153029	-3	9683	NM_153029	N4BP1	0.948601
chr16	67753069	67753608	1_NT1_cutoff_0.02_peak_10058	148.5	77	4.62e-13	1.93	0.518135	UP	promoter-TSS (NR_027398)	NM_030819	-66	81577	NM_030819	GFOD2	0.948601
chr17	73900789	73901140	1_NT1_cutoff_0.02_peak_11977	148.5	77	4.62e-13	1.93	0.518135	UP	5' UTR (NM_032478, exon 1 of 9)	NM_032478	216	64978	NM_032478	MRPL38	0.948601
chr19	3500386	3500807	3_NTT1_cutoff_0.02_peak_9749	193.3	100	1.11e-16	1.93	0.518135	UP	promoter-TSS (NM_031304)	NM_031304	24	83475	NM_031304	DOHH	0.948601
chr19	7745652	7745969	1_NT1_cutoff_0.02_peak_13111	121.7	63	5.8e-11	1.93	0.518135	UP	5' UTR (NM_174894, exon 1 of 2)	NM_001042461	104	126003	NM_174894	TRAPPC5	0.948601
chr19	12273796	12274179	3_NTT1_cutoff_0.02_peak_10031	73.4	38	3e-07	1.93	0.518135	UP	5' UTR (NM_001348013, exon 1 of 3)	NM_003437	126	7695	NM_003437	ZNF136	0.948601
chr19	38893681	38893996	1_NT1_cutoff_0.02_peak_13827	81.1	42	6.11e-08	1.93	0.518135	UP	promoter-TSS (NM_174905)	NM_001351675	64	147965	NM_174905	FAM98C	0.948601
chr19	40854059	40854791	1_NT1_cutoff_0.02_peak_13887	232.2	120	8.87e-20	1.93	0.518135	UP	promoter-TSS (NR_046202)	NM_001256440	9	126526	NM_178830	C19orf47	0.948601
chr2	27592907	27594326	3_NTT1_cutoff_0.02_peak_11115	529.1	274	1.45e-42	1.93	0.518135	UP	promoter-TSS (NM_001318966)	NR_049787	254	9784	NM_014748	SNX17	0.948601
chr2	74055826	74056317	3_NTT1_cutoff_0.02_peak_11416	177.8	92	2.54e-15	1.93	0.518135	UP	promoter-TSS (NM_213622)	NR_148671	-22	10617	NM_006463	STAMBP	0.948601
chr2	109065308	109065875	3_NTT1_cutoff_0.02_peak_11582	246.8	128	1.48e-20	1.93	0.518135	UP	promoter-TSS (NM_181453)	NM_181453	15	9648	NM_181453	GCC2	0.948601
chr20	524186	524579	1_NT1_cutoff_0.02_peak_16250	154.5	80	1.43e-13	1.93	0.518135	UP	promoter-TSS (NM_177559)	NM_177560	99	1457	NM_001895	CSNK2A1	0.948601
chr20	61557218	61558053	1_NT1_cutoff_0.02_peak_16993	232.2	120	8.87e-20	1.93	0.518135	UP	intron (NM_033081, intron 1 of 15)	NM_080796	267	11083	NM_022105	DIDO1	0.948601
chr4	104119314	104119841	3_NTT1_cutoff_0.02_peak_14922	57.8	30	7.38e-06	1.93	0.518135	UP	promoter-TSS (NM_001286734)	NM_001813	-12	1062	NM_001813	CENPE	0.948601
chr5	179921147	179921647	3_NTT1_cutoff_0.02_peak_16085	162.3	84	2.98e-14	1.93	0.518135	UP	promoter-TSS (NM_001303241)	NM_001303241	-2	57472	NM_015455	CNOT6	0.948601
chr6	43337418	43337694	3_NTT1_cutoff_0.02_peak_16497	98.4	51	3.38e-09	1.93	0.518135	UP	promoter-TSS (NM_014345)	NM_014345	-375	24149	NM_014345	ZNF318	0.948601
chr6	134273922	134274542	1_NT1_cutoff_0.02_peak_22489	208	108	9.54e-18	1.93	0.518135	UP	promoter-TSS (NM_004865)	NM_004865	-69	9519	NM_004865	TBPL1	0.948601
chr7	128694474	128695542	1_NT1_cutoff_0.02_peak_24012	321.9	167	2.81e-26	1.93	0.518135	UP	promoter-TSS (NR_002187)	NM_001191028	219	23534	NM_012470	TNPO3	0.948601
chr8	101162496	101163104	1_NT1_cutoff_0.02_peak_24742	275.3	143	8.4e-23	1.93	0.518135	UP	promoter-TSS (NM_005034)	NM_005034	-39	5440	NM_005034	POLR2K	0.948601
chr9	111696597	111696826	1_NT1_cutoff_0.02_peak_25877	48.3	25	2.83e-05	1.93	0.518135	UP	promoter-TSS (NM_001330749)	NM_017832	39	54942	NM_017832	FAM206A	0.948601
chr9	115480140	115480502	3_NTT1_cutoff_0.02_peak_19053	40.6	21	0.000144	1.93	0.518135	UP	non-coding (NR_138054, exon 1 of 3)	NM_021218	108	58493	NM_021218	INIP	0.948601
chr10	70480723	70481605	3_NTT1_cutoff_0.02_peak_2778	334	174	3.59e-27	1.92	0.520833	UP	intron (NM_001282959, intron 1 of 23)	NM_018237	263	55749	NM_018237	CCAR1	0.941106
chr11	116658560	116658914	3_NTT1_cutoff_0.02_peak_4103	191.6	100	4.17e-16	1.92	0.520833	UP	promoter-TSS (NM_001317086)	NM_003904	17	8882	NM_003904	ZPR1	0.941106
chr12	121148140	121148525	1_NT1_cutoff_0.02_peak_6966	128.6	67	2.33e-11	1.92	0.520833	UP	promoter-TSS (NM_001080533)	NM_001080533	95	84747	NM_032661	UNC119B	0.941106
chr13	44715859	44716357	3_NTT1_cutoff_0.02_peak_5331	214.9	112	7.5e-18	1.92	0.520833	UP	promoter-TSS (NR_104064)	NR_104064	-356	101929212	NR_104064	SMIM2-AS1	0.941106
chr16	2273486	2273843	1_NT1_cutoff_0.02_peak_9396	151.9	79	4.09e-13	1.92	0.520833	UP	exon (NM_001288778, exon 1 of 12)	NM_001288778	176	1877	NM_004424	E4F1	0.941106
chr17	18761345	18761716	1_NT1_cutoff_0.02_peak_10842	94.1	49	7.44e-09	1.92	0.520833	UP	5' UTR (NM_001353107, exon 1 of 11)	NM_001353100	150	5636	NM_002767	PRPSAP2	0.941106
chr17	37607342	37607853	1_NT1_cutoff_0.02_peak_11198	242.5	126	3.23e-20	1.92	0.520833	UP	promoter-TSS (NM_004774)	NM_004774	-71	5469	NM_004774	MED1	0.941106
chr2	73964259	73964848	1_NT1_cutoff_0.02_peak_15151	178.7	93	3.32e-15	1.92	0.520833	UP	promoter-TSS (NM_001330386)	NM_001330390	-21	51002	NM_016058	TPRKB	0.941106
chr20	33680267	33680850	1_NT1_cutoff_0.02_peak_16570	205.4	107	2.73e-17	1.92	0.520833	UP	promoter-TSS (NM_015638)	NM_199368	59	26133	NM_015638	TRPC4AP	0.941106
chr4	13629283	13630060	1_NT1_cutoff_0.02_peak_19640	307.3	160	4.25e-25	1.92	0.520833	UP	promoter-TSS (NM_148894)	NR_049814	183	100847023	NR_049814	MIR5091	0.941106
chr5	68513438	68514212	1_NT1_cutoff_0.02_peak_20606	159.7	83	8.56e-14	1.92	0.520833	UP	intron (NM_033281, intron 1 of 3)	NM_033281	252	92259	NM_033281	MRPS36	0.941106
chr6	159238818	159239563	3_NTT1_cutoff_0.02_peak_16893	295.2	154	4.36e-24	1.92	0.520833	UP	5' UTR (NM_003379, exon 1 of 13)	NM_003379	149	7430	NM_003379	EZR	0.941106
chr7	44111276	44112515	3_NTT1_cutoff_0.02_peak_17289	126.9	66	3.46e-11	1.92	0.520833	UP	non-coding (NR_104299, exon 11 of 11)	NR_106897	1136	102465504	NR_106897	MIR6838	0.941106
chr7	100770253	100770610	3_NTT1_cutoff_0.02_peak_17668	182.1	95	1.52e-15	1.92	0.520833	UP	promoter-TSS (NM_000602)	NM_000602	62	5054	NM_000602	SERPINE1	0.941106
chr1	19923207	19923870	1_NT1_cutoff_0.02_peak_373	253.7	133	1.51e-20	1.91	0.52356	UP	promoter-TSS (NR_135054)	NM_001204082	68	440574	NM_001032363	MINOS1	0.933573
chr1	35497076	35497603	3_NTT1_cutoff_0.02_peak_520	164	86	9.81e-14	1.91	0.52356	UP	intron (NM_007167, intron 1 of 15)	NM_007167	229	9204	NM_007167	ZMYM6	0.933573
chr1	168148112	168148745	1_NT1_cutoff_0.02_peak_2236	177.8	93	6.4e-15	1.91	0.52356	UP	intron (NM_001031800, intron 1 of 4)	NM_001031800	346	261726	NM_152902	TIPRL	0.933573
chr10	102289309	102289888	3_NTT1_cutoff_0.02_peak_3015	164	86	9.81e-14	1.91	0.52356	UP	promoter-TSS (NM_001284368)	NM_001284367	81	4714	NM_005004	NDUFB8	0.933573
chr11	28129479	28130146	1_NT1_cutoff_0.02_peak_4474	122.6	64	7.58e-11	1.91	0.52356	UP	promoter-TSS (NM_001113528)	NM_152636	15	196074	NM_152636	METTL15	0.933573
chr12	77157862	77158381	3_NTT1_cutoff_0.02_peak_4780	208	109	2.41e-17	1.91	0.52356	UP	promoter-TSS (NM_001359626)	NM_001359626	84	23390	NM_015336	ZDHHC17	0.933573
chr13	25875610	25876238	1_NT1_cutoff_0.02_peak_7191	239.1	125	9.18e-20	1.91	0.52356	UP	exon (NM_014089, exon 1 of 16)	NM_001008564	258	9818	NM_014089	NUP58	0.933573
chr14	23938760	23939166	1_NT1_cutoff_0.02_peak_7771	145	76	2.54e-12	1.91	0.52356	UP	promoter-TSS (NM_015514)	NM_015514	65	25983	NM_015514	NGDN	0.933573
chr15	42500150	42500672	1_NT1_cutoff_0.02_peak_8604	146.7	77	1.72e-12	1.91	0.52356	UP	5' UTR (NM_001301138, exon 1 of 26)	NM_001301138	113	23339	NM_015289	VPS39	0.933573
chr15	44719244	44720058	1_NT1_cutoff_0.02_peak_8653	195.1	102	1.91e-16	1.91	0.52356	UP	promoter-TSS (NM_016396)	NM_016396	72	51496	NM_016396	CTDSPL2	0.933573
chr16	77224758	77225308	1_NT1_cutoff_0.02_peak_10240	154.5	81	3.6e-13	1.91	0.52356	UP	5' UTR (NM_001286639, exon 1 of 5)	NM_001286639	217	22879	NM_014940	MON1B	0.933573
chr17	1465697	1466171	1_NT1_cutoff_0.02_peak_10451	105.3	55	1.35e-09	1.91	0.52356	UP	5' UTR (NM_006224, exon 1 of 12)	NM_006224	176	5306	NM_006224	PITPNA	0.933573
chr17	38974946	38975739	3_NTT1_cutoff_0.02_peak_8588	332.3	174	1.33e-26	1.91	0.52356	UP	promoter-TSS (NM_001195386)	NM_001195387	-1	147184	NM_145274	TMEM99	0.933573
chr17	73257436	73258568	1_NT1_cutoff_0.02_peak_11914	379.8	199	5.84e-30	1.91	0.52356	UP	promoter-TSS (NM_014001)	NM_015971	253	51081	NM_015971	MRPS7	0.933573
chr17	81037384	81037655	3_NTT1_cutoff_0.02_peak_9318	70.8	37	8.71e-07	1.91	0.52356	UP	promoter-TSS (NM_001004431)	NM_001004431	-47	284207	NM_001004431	METRNL	0.933573
chr19	42829674	42830089	1_NT1_cutoff_0.02_peak_13982	122.6	64	7.58e-11	1.91	0.52356	UP	TTS (NM_173633)	NM_001271938	121	1954	NM_001410	MEGF8	0.933573
chr20	62526242	62526828	3_NTT1_cutoff_0.02_peak_12812	170	89	1.58e-14	1.91	0.52356	UP	promoter-TSS (NM_025219)	NM_025219	80	80331	NM_025219	DNAJC5	0.933573
chr21	30365001	30365604	1_NT1_cutoff_0.02_peak_17078	145	76	2.54e-12	1.91	0.52356	UP	promoter-TSS (NM_015565)	NM_001320766	-23	26046	NM_015565	LTN1	0.933573
chr4	68410945	68411656	1_NT1_cutoff_0.02_peak_19811	193.3	101	2.83e-16	1.91	0.52356	UP	promoter-TSS (NM_001812)	NM_001812	-45	1060	NM_001812	CENPC	0.933573
chr5	110074501	110074970	3_NTT1_cutoff_0.02_peak_15420	183	96	3.81e-15	1.91	0.52356	UP	promoter-TSS (NR_138151)	NM_001303249	63	91137	NM_138773	SLC25A46	0.933573
chr6	149867005	149867605	1_NT1_cutoff_0.02_peak_22561	132.1	69	1.06e-11	1.91	0.52356	UP	promoter-TSS (NM_139126)	NM_139126	-67	85313	NM_139126	PPIL4	0.933573
chr6_apd_hap1	3110163	3110503	3_NTT1_cutoff_0.02_peak_16958	105.3	55	1.35e-09	1.91	0.52356	UP	promoter-TSS (NM_005346).5	NM_005346	57	3304	NM_005346	HSPA1B	0.933573
chr7	44924742	44925770	1_NT1_cutoff_0.02_peak_23346	484.2	253	3.51e-38	1.91	0.52356	UP	promoter-TSS (NM_033224)	NM_033224	-272	5814	NM_033224	PURB	0.933573
chr9	115913192	115913467	1_NT1_cutoff_0.02_peak_25915	45.7	24	8.3e-05	1.91	0.52356	UP	promoter-TSS (NM_001860)	NM_001860	92	1318	NM_001860	SLC31A2	0.933573
chrX	40439883	40440340	3_NTT1_cutoff_0.02_peak_19488	70.8	37	8.71e-07	1.91	0.52356	UP	promoter-TSS (NM_005765)	NM_005765	-104	10159	NM_005765	ATP6AP2	0.933573
chrX	44732333	44732622	1_NT1_cutoff_0.02_peak_26492	105.3	55	1.35e-09	1.91	0.52356	UP	promoter-TSS (NM_001291416)	NM_001291416	57	7403	NM_021140	KDM6A	0.933573
chr1	100818000	100818162	1_NT1_cutoff_0.02_peak_1439	28.5	15	0.00172	1.9	0.526316	UP	promoter-TSS (NM_033313)	NM_001319210	58	8556	NM_003672	CDC14A	0.925999
chr1	172502181	172502477	1_NT1_cutoff_0.02_peak_2258	113.9	60	7e-10	1.9	0.526316	UP	promoter-TSS (NM_001282750)	NM_001282750	71	51430	NM_014283	SUCO	0.925999
chr1	228269658	228271289	1_NT1_cutoff_0.02_peak_2785	998.6	526	6.67e-75	1.9	0.526316	UP	promoter-TSS (NM_001024228)	NM_001658	113	375	NM_001658	ARF1	0.925999
chr11	65728723	65729667	1_NT1_cutoff_0.02_peak_4948	353.9	186	8.91e-28	1.9	0.526316	UP	promoter-TSS (NM_005146)	NM_005146	35	9092	NM_005146	SART1	0.925999
chr12	108955722	108956556	1_NT1_cutoff_0.02_peak_6810	132.9	70	2.66e-11	1.9	0.526316	UP	promoter-TSS (NM_014706)	NM_001301140	900	23479	NM_014301	ISCU	0.925999
chr12	112279523	112280250	1_NT1_cutoff_0.02_peak_6863	273.6	144	7.75e-22	1.9	0.526316	UP	promoter-TSS (NM_003668)	NM_003668	-145	8550	NM_003668	MAPKAPK5	0.925999
chr13	21714195	21714999	1_NT1_cutoff_0.02_peak_7172	262.4	138	4.16e-21	1.9	0.526316	UP	promoter-TSS (NM_005870)	NM_005870	-56	10284	NM_005870	SAP18	0.925999
chr13	41344904	41345537	1_NT1_cutoff_0.02_peak_7273	157.9	83	3.16e-13	1.9	0.526316	UP	exon (NM_005830, exon 1 of 7)	NM_005830	126	10240	NM_005830	MRPS31	0.925999
chr13	73301226	73301911	1_NT1_cutoff_0.02_peak_7388	104.4	55	2.61e-09	1.9	0.526316	UP	promoter-TSS (NM_024808)	NM_024808	-318	79866	NM_024808	BORA	0.925999
chr16	28857255	28858026	3_NTT1_cutoff_0.02_peak_7446	261.5	138	7.92e-21	1.9	0.526316	UP	promoter-TSS (NM_001308293)	NM_003321	88	7284	NM_003321	TUFM	0.925999
chr16	67225879	67226321	3_NTT1_cutoff_0.02_peak_7647	249.4	131	3.29e-20	1.9	0.526316	UP	promoter-TSS (NM_001950)	NM_001950	32	1874	NM_001950	E2F4	0.925999
chr17	80415852	80416855	1_NT1_cutoff_0.02_peak_12249	537.7	283	3.04e-41	1.9	0.526316	UP	promoter-TSS (NM_012336)	NM_031968	-186	26502	NM_012336	NARF	0.925999
chr19	8509480	8510225	1_NT1_cutoff_0.02_peak_13136	340.9	179	7e-27	1.9	0.526316	UP	promoter-TSS (NM_031203)	NM_005968	50	4670	NM_005968	HNRNPM	0.925999
chr19	16682993	16683663	1_NT1_cutoff_0.02_peak_13489	224.4	118	2.68e-18	1.9	0.526316	UP	promoter-TSS (NM_024881)	NM_024881	-135	79939	NM_024881	SLC35E1	0.925999
chr19	19626638	19627391	3_NTT1_cutoff_0.02_peak_10279	298.6	157	9.61e-24	1.9	0.526316	UP	promoter-TSS (NM_015965)	NM_015965	-4	51079	NM_015965	NDUFA13	0.925999
chr19	29703683	29704451	3_NTT1_cutoff_0.02_peak_10312	296.9	156	1.41e-23	1.9	0.526316	UP	promoter-TSS (NM_006003)	NM_006003	69	7386	NM_006003	UQCRFS1	0.925999
chr19	42721645	42722289	1_NT1_cutoff_0.02_peak_13954	167.4	88	4.5e-14	1.9	0.526316	UP	promoter-TSS (NM_001270615)	NR_073052	-23	162989	NM_133328	DEDD2	0.925999
chr2	24149733	24150454	1_NT1_cutoff_0.02_peak_14719	261.5	138	7.92e-21	1.9	0.526316	UP	promoter-TSS (NM_001242338)	NM_017552	-110	54454	NM_017552	ATAD2B	0.925999
chr3	33839889	33840891	1_NT1_cutoff_0.02_peak_18249	375.4	198	3.13e-29	1.9	0.526316	UP	exon (NM_013374, exon 1 of 18)	NM_001162429	327	10015	NM_013374	PDCD6IP	0.925999
chr3	197517876	197518619	3_NTT1_cutoff_0.02_peak_14518	240.8	127	2.96e-19	1.9	0.526316	UP	exon (NM_032773, exon 1 of 19)	NM_032773	151	84859	NM_032773	LRCH3	0.925999
chr5	125936468	125937065	1_NT1_cutoff_0.02_peak_20822	237.4	125	3.37e-19	1.9	0.526316	UP	intron (NM_032177, intron 1 of 4)	NM_032177	160	51808	NM_032177	PHAX	0.925999
chr7	66461752	66462042	1_NT1_cutoff_0.02_peak_23480	94.9	50	1.87e-08	1.9	0.526316	UP	non-coding (NR_134540, exon 1 of 15)	NR_134540	105	55253	NM_018264	TYW1	0.925999
chr7	76256125	76256848	1_NT1_cutoff_0.02_peak_23617	361.6	190	1.9e-28	1.9	0.526316	UP	non-coding (NR_029411, exon 3 of 3)	NM_152992	133	22932	NM_012230	POMZP3	0.925999
chr7	123197733	123198189	3_NTT1_cutoff_0.02_peak_17801	85.4	45	7.02e-08	1.9	0.526316	UP	promoter-TSS (NR_104169)	NM_005000	-3	4698	NM_005000	NDUFA5	0.925999
chr7	128416296	128416484	3_NTT1_cutoff_0.02_peak_17813	19	10	0.0143	1.9	0.526316	UP	promoter-TSS (NM_001708)	NM_001708	-546	611	NM_001708	OPN1SW	0.925999
chr8	27629823	27630453	3_NTT1_cutoff_0.02_peak_18073	229.6	121	1.59e-18	1.9	0.526316	UP	promoter-TSS (NM_001304532)	NM_001304532	32	55246	NM_018246	CCDC25	0.925999
chrX	53024468	53024656	3_NTT1_cutoff_0.02_peak_19581	28.5	15	0.00172	1.9	0.526316	UP	promoter-TSS (NM_014138)	NM_001242492	89	29057	NM_014138	FAM156A	0.925999
chrX	106361841	106362077	1_NT1_cutoff_0.02_peak_26758	55.2	29	1.1e-05	1.9	0.526316	UP	promoter-TSS (NM_001171080)	NR_136728	98	55285	NM_018301	RBM41	0.925999
chr1	163291308	163292296	1_NT1_cutoff_0.02_peak_2196	283.1	150	2.75e-22	1.89	0.529101	UP	promoter-TSS (NR_045630)	NM_145697	79	83540	NM_031423	NUF2	0.918386
chr10	89264326	89264795	3_NTT1_cutoff_0.02_peak_2913	192.5	102	1.34e-15	1.89	0.529101	UP	TTS (NR_039825)	NM_001178117	338	9562	NM_004897	MINPP1	0.918386
chr10	102027237	102027738	1_NT1_cutoff_0.02_peak_3789	157.1	83	3.16e-13	1.89	0.529101	UP	promoter-TSS (NM_018294)	NM_001303406	-50	55280	NM_018294	CWF19L1	0.918386
chr11	47599993	47600857	1_NT1_cutoff_0.02_peak_4587	247.7	131	1.19e-19	1.89	0.529101	UP	promoter-TSS (NM_001318725)	NM_001318725	-102	55709	NM_016506	KBTBD4	0.918386
chr11	66056213	66056961	1_NT1_cutoff_0.02_peak_4963	246	130	1.76e-19	1.89	0.529101	UP	promoter-TSS (NM_020470)	NM_020470	51	10897	NM_020470	YIF1A	0.918386
chr12	50898721	50898999	3_NTT1_cutoff_0.02_peak_4463	58.7	31	9.56e-06	1.89	0.529101	UP	promoter-TSS (NM_173602)	NM_173602	92	57609	NM_020849	DIP2B	0.918386
chr12	123237226	123237919	1_NT1_cutoff_0.02_peak_7031	270.1	143	2.17e-21	1.89	0.529101	UP	intron (NM_003677, intron 1 of 7)	NM_003677	205	8562	NM_003677	DENR	0.918386
chr12	132434285	132434683	3_NTT1_cutoff_0.02_peak_5151	126.9	67	8.59e-11	1.89	0.529101	UP	promoter-TSS (NM_015409)	NM_015409	19	57634	NM_015409	EP400	0.918386
chr13	111268687	111268845	1_NT1_cutoff_0.02_peak_7528	39.7	21	0.000281	1.89	0.529101	UP	intron (NM_018210, intron 1 of 9)	NM_001242881	835	55739	NM_018210	NAXD	0.918386
chr15	80215444	80215596	1_NT1_cutoff_0.02_peak_8997	39.7	21	0.000281	1.89	0.529101	UP	promoter-TSS (NM_001199760)	NM_001199760	-72	100528021	NM_001199760	ST20-MTHFS	0.918386
chr17	61920209	61920741	3_NTT1_cutoff_0.02_peak_8960	119.1	63	2.16e-10	1.89	0.529101	UP	promoter-TSS (NM_001330439)	NM_001098426	-124	6603	NM_003077	SMARCD2	0.918386
chr19	12845080	12845654	1_NT1_cutoff_0.02_peak_13329	304.7	161	7.4e-24	1.89	0.529101	UP	exon (NM_024038, exon 1 of 3)	NM_001329739	222	79002	NM_024038	TRIR	0.918386
chr19	47987244	47987807	3_NTT1_cutoff_0.02_peak_10655	230.4	122	2.06e-18	1.89	0.529101	UP	promoter-TSS (NR_111923)	NM_007059	-5	11133	NM_007059	KPTN	0.918386
chr2	61698104	61699130	3_NTT1_cutoff_0.02_peak_11313	407.4	216	3.89e-31	1.89	0.529101	UP	promoter-TSS (NM_014709)	NM_014709	-768	9736	NM_014709	USP34	0.918386
chr2	74618943	74619241	3_NTT1_cutoff_0.02_peak_11430	69.9	37	1.67e-06	1.89	0.529101	UP	non-coding (NR_033935, exon 1 of 27)	NM_001190836	122	1639	NM_004082	DCTN1	0.918386
chr20	18487852	18488924	1_NT1_cutoff_0.02_peak_16424	426.4	226	1.56e-32	1.89	0.529101	UP	promoter-TSS (NM_001172745)	NM_001172745	-201	10483	NM_006363	SEC23B	0.918386
chr20	55926107	55926711	1_NT1_cutoff_0.02_peak_16891	219.2	116	1.11e-17	1.89	0.529101	UP	promoter-TSS (NM_001015885)	NM_001015885	-209	8480	NM_003610	RAE1	0.918386
chr3	93781367	93782320	1_NT1_cutoff_0.02_peak_18686	333.2	176	4.26e-26	1.89	0.529101	UP	promoter-TSS (NM_022072)	NM_176815	-13	200895	NM_176815	DHFR2	0.918386
chr3	185000439	185000987	1_NT1_cutoff_0.02_peak_19311	217.5	115	1.63e-17	1.89	0.529101	UP	promoter-TSS (NM_001242317)	NM_001242317	-16	9175	NM_004721	MAP3K13	0.918386
chr4	2470373	2471170	3_NTT1_cutoff_0.02_peak_14602	246	130	1.76e-19	1.89	0.529101	UP	promoter-TSS (NM_001185010)	NM_001185010	-23	6047	NM_002938	RNF4	0.918386
chr5	68389685	68390176	3_NTT1_cutoff_0.02_peak_15300	173.5	92	3.44e-14	1.89	0.529101	UP	5' UTR (NM_001251969, exon 1 of 3)	NM_024055	155	64924	NM_022902	SLC30A5	0.918386
chr5	137878015	137878243	1_NT1_cutoff_0.02_peak_20984	58.7	31	9.56e-06	1.89	0.529101	UP	promoter-TSS (NM_001282185)	NM_001291974	-729	2107	NM_004730	ETF1	0.918386
chr8	64080632	64081518	1_NT1_cutoff_0.02_peak_24612	332.3	176	8.08e-26	1.89	0.529101	UP	promoter-TSS (NM_001277818)	NM_001277816	-37	253943	NM_152758	YTHDF3	0.918386
chr9	19408879	19409170	1_NT1_cutoff_0.02_peak_25377	79.4	42	2.3e-07	1.89	0.529101	UP	promoter-TSS (NM_001010887)	NM_001010887	100	340485	NM_001010887	ACER2	0.918386
chr9	135905578	135905996	1_NT1_cutoff_0.02_peak_26191	203.7	108	2.47e-16	1.89	0.529101	UP	promoter-TSS (NM_001286709)	NR_135119	22	105376306	NR_135119	LOC105376306	0.918386
chr9	136223108	136223672	1_NT1_cutoff_0.02_peak_26208	238.2	126	4.36e-19	1.89	0.529101	UP	promoter-TSS (NM_017503)	NM_001280787	-29	6834	NM_003172	SURF1	0.918386
chrX	83756809	83757045	3_NTT1_cutoff_0.02_peak_19675	30.2	16	0.00113	1.89	0.529101	UP	intron (NM_001177479, intron 1 of 10)	NM_001177479	560	139324	NM_144657	HDX	0.918386
chr1	39338833	39339464	1_NT1_cutoff_0.02_peak_822	159.7	85	5.24e-13	1.88	0.531915	UP	promoter-TSS (NR_037632)	NR_135048	76	105378663	NR_135048	LOC105378663	0.910733
chr1	74663767	74664131	3_NTT1_cutoff_0.02_peak_957	103.6	55	4.98e-09	1.88	0.531915	UP	promoter-TSS (NM_001199327)	NM_003838	53	8790	NM_003838	FPGT	0.910733
chr1	180601065	180601350	3_NTT1_cutoff_0.02_peak_1900	94.1	50	1.87e-08	1.88	0.531915	UP	promoter-TSS (NM_004736)	NM_001328662	62	9213	NM_004736	XPR1	0.910733
chr1	181057260	181062646	1_NT1_cutoff_0.02_peak_2316	2310.5	1228	1.82e-166	1.88	0.531915	UP	TTS (NM_016545)	NM_016545	2315	51278	NM_016545	IER5	0.910733
chr11	65100992	65101540	1_NT1_cutoff_0.02_peak_4890	154.5	82	8.89e-13	1.88	0.531915	UP	promoter-TSS (NM_006268)	NM_001330308	41	5977	NM_006268	DPF2	0.910733
chr11	107328364	107328965	1_NT1_cutoff_0.02_peak_5307	127.7	68	1.1e-10	1.88	0.531915	UP	promoter-TSS (NM_152434)	NM_152434	-93	143884	NM_152434	CWF19L2	0.910733
chr13	45694468	45694800	1_NT1_cutoff_0.02_peak_7303	73.4	39	7.56e-07	1.88	0.531915	UP	promoter-TSS (NM_004128)	NM_004128	3	2963	NM_004128	GTF2F2	0.910733
chr14	54976532	54976763	3_NTT1_cutoff_0.02_peak_5942	41.4	22	0.000187	1.88	0.531915	UP	promoter-TSS (NM_006568)	NM_006568	61	10668	NM_006568	CGRRF1	0.910733
chr14	102430779	102431126	1_NT1_cutoff_0.02_peak_8327	151.9	81	2.48e-12	1.88	0.531915	UP	promoter-TSS (NM_001376)	NM_001376	88	1778	NM_001376	DYNC1H1	0.910733
chr15	49170066	49170552	1_NT1_cutoff_0.02_peak_8688	151.9	81	2.48e-12	1.88	0.531915	UP	promoter-TSS (NM_014335)	NM_014335	19	23741	NM_014335	EID1	0.910733
chr16	1359522	1360249	1_NT1_cutoff_0.02_peak_9325	248.6	132	1.53e-19	1.88	0.531915	UP	intron (NM_003345, intron 1 of 6)	NM_003345	258	7329	NM_003345	UBE2I	0.910733
chr17	1419788	1420623	1_NT1_cutoff_0.02_peak_10448	278.8	148	1.13e-21	1.88	0.531915	UP	promoter-TSS (NM_001135642)	NR_028514	-7	100306951	NR_028514	PITPNA-AS1	0.910733
chr17	40306737	40307099	1_NT1_cutoff_0.02_peak_11311	159.7	85	5.24e-13	1.88	0.531915	UP	5' UTR (NM_201434, exon 1 of 7)	NM_004583	144	5878	NM_004583	RAB5C	0.910733
chr17	40761197	40761504	1_NT1_cutoff_0.02_peak_11337	84.6	45	1.34e-07	1.88	0.531915	UP	promoter-TSS (NM_178126)	NM_001070	-7	7283	NM_001070	TUBG1	0.910733
chr17	42785809	42786219	1_NT1_cutoff_0.02_peak_11422	75.1	40	5.08e-07	1.88	0.531915	UP	promoter-TSS (NR_036623)	NM_145663	38	80174	NM_025104	DBF4B	0.910733
chr18	21718900	21719233	3_NTT1_cutoff_0.02_peak_9442	63.9	34	5.51e-06	1.88	0.531915	UP	promoter-TSS (NM_138644)	NM_153769	147	26256	NM_012189	CABYR	0.910733
chr19	58816459	58816962	3_NTT1_cutoff_0.02_peak_10946	225.3	120	8.45e-18	1.88	0.531915	UP	promoter-TSS (NR_144445)	NR_144445	-29	105372481	NR_144445	ERVK3-1	0.910733
chr2	97426483	97426854	3_NTT1_cutoff_0.02_peak_11536	127.7	68	1.1e-10	1.88	0.531915	UP	promoter-TSS (NM_020184)	NM_020184	30	26504	NM_020184	CNNM4	0.910733
chr20	60718082	60718602	1_NT1_cutoff_0.02_peak_16949	178.7	95	2.03e-14	1.88	0.531915	UP	promoter-TSS (NR_125981)	NM_002792	172	5688	NM_002792	PSMA7	0.910733
chr4	123653459	123653627	3_NTT1_cutoff_0.02_peak_14986	31.9	17	0.00145	1.88	0.531915	UP	promoter-TSS (NM_152618)	NR_024041	70	729338	NR_024041	CETN4P	0.910733
chr6	26659553	26660191	3_NTT1_cutoff_0.02_peak_16276	172.6	92	6.51e-14	1.88	0.531915	UP	5' UTR (NM_001242799, exon 1 of 3)	NM_001242798	108	79692	NM_024639	ZNF322	0.910733
chr6	139695477	139695956	3_NTT1_cutoff_0.02_peak_16817	403.9	215	2.04e-30	1.88	0.531915	UP	promoter-TSS (NM_001168388)	NM_006079	70	10370	NM_006079	CITED2	0.910733
chr6_ssto_hap7	2919311	2919655	3_NTT1_cutoff_0.02_peak_17037	31.9	17	0.00145	1.88	0.531915	UP	intron (NM_080686, intron 1 of 30).7	NM_004638	230	7916	NM_004638	PRRC2A	0.910733
chr7	33148811	33149205	1_NT1_cutoff_0.02_peak_23255	94.1	50	1.87e-08	1.88	0.531915	UP	promoter-TSS (NM_203288)	NM_203288	-6	6100	NM_203288	RP9	0.910733
chr9	130186133	130186943	1_NT1_cutoff_0.02_peak_26005	272.7	145	3.59e-21	1.88	0.531915	UP	promoter-TSS (NM_001322260)	NM_001286696	-115	7633	NM_007135	ZNF79	0.910733
chrX	131351242	131351706	3_NTT1_cutoff_0.02_peak_19747	94.1	50	1.87e-08	1.88	0.531915	UP	5' UTR (NM_021183, exon 2 of 4)	NM_021183	715	57826	NM_021183	RAP2C	0.910733
chr1	71546954	71547239	1_NT1_cutoff_0.02_peak_1254	57.8	31	1.82e-05	1.87	0.534759	UP	promoter-TSS (NR_046217)	NR_046217	90	100852410	NR_046217	ZRANB2-AS2	0.903038
chr1	161102134	161103235	1_NT1_cutoff_0.02_peak_2158	396.2	212	1.21e-29	1.87	0.534759	UP	promoter-TSS (NM_032998)	NM_001039711	-207	9191	NM_004216	DEDD	0.903038
chr10	27443001	27443612	1_NT1_cutoff_0.02_peak_3215	229.6	123	9.37e-18	1.87	0.534759	UP	promoter-TSS (NM_001320757)	NM_139312	42	10730	NM_014263	YME1L1	0.903038
chr10	71929961	71930676	1_NT1_cutoff_0.02_peak_3529	404.8	216	2.61e-30	1.87	0.534759	UP	promoter-TSS (NM_020150)	NM_001142648	-34	56681	NM_020150	SAR1A	0.903038
chr10	72163757	72164168	3_NTT1_cutoff_0.02_peak_2799	108.7	58	2.91e-09	1.87	0.534759	UP	5' UTR (NM_004096, exon 1 of 3)	NM_004096	102	1979	NM_004096	EIF4EBP2	0.903038
chr10	95462036	95462643	1_NT1_cutoff_0.02_peak_3696	231.3	124	6.37e-18	1.87	0.534759	UP	promoter-TSS (NR_144635)	NM_001347713	-11	118924	NM_145246	FRA10AC1	0.903038
chr10	112679238	112679593	1_NT1_cutoff_0.02_peak_3963	101	54	1.39e-08	1.87	0.534759	UP	promoter-TSS (NM_001195307)	NM_007373	115	8036	NM_007373	SHOC2	0.903038
chr10	126480215	126480740	1_NT1_cutoff_0.02_peak_4064	177.8	95	3.83e-14	1.87	0.534759	UP	promoter-TSS (NM_001304468)	NM_001304468	32	399818	NM_212554	EEF1AKMT2	0.903038
chr11	236124	237285	1_NT1_cutoff_0.02_peak_4127	297.8	159	1.08e-22	1.87	0.534759	UP	promoter-TSS (NM_175932)	NM_175932	-103	5719	NM_002817	PSMD13	0.903038
chr11	57508548	57509256	1_NT1_cutoff_0.02_peak_4646	173.5	93	8.31e-14	1.87	0.534759	UP	TTS (NR_037645)	NM_170746	180	280636	NM_170746	SELENOH	0.903038
chr11	77532069	77532339	1_NT1_cutoff_0.02_peak_5207	54.4	29	2.13e-05	1.87	0.534759	UP	promoter-TSS (NM_001316960)	NM_001316961	44	28971	NM_024684	AAMDC	0.903038
chr13	111267572	111268102	1_NT1_cutoff_0.02_peak_7527	183	98	2.25e-14	1.87	0.534759	UP	promoter-TSS (NM_001242883)	NM_001242882	30	55739	NM_018210	NAXD	0.903038
chr14	57046403	57046738	1_NT1_cutoff_0.02_peak_7991	149.3	80	3.66e-12	1.87	0.534759	UP	promoter-TSS (NM_017799)	NM_017799	60	54916	NM_017799	TMEM260	0.903038
chr14	69864276	69865625	1_NT1_cutoff_0.02_peak_8113	469.5	251	8.69e-35	1.87	0.534759	UP	promoter-TSS (NM_001252152)	NM_004450	70	2079	NM_004450	ERH	0.903038
chr16	4784008	4784401	1_NT1_cutoff_0.02_peak_9526	99.3	53	1.09e-08	1.87	0.534759	UP	promoter-TSS (NM_139170)	NM_001324130	-42	124401	NM_133450	ANKS3	0.903038
chr17	27619490	27621540	1_NT1_cutoff_0.02_peak_10987	793.2	425	3.11e-57	1.87	0.534759	UP	intron (NM_020772, intron 1 of 3)	NM_020772	651	57532	NM_020772	NUFIP2	0.903038
chr17	45928395	45928677	3_NTT1_cutoff_0.02_peak_8752	57.8	31	1.82e-05	1.87	0.534759	UP	promoter-TSS (NM_001258248)	NM_001258248	-20	80320	NM_199262	SP6	0.903038
chr2	122406449	122406693	3_NTT1_cutoff_0.02_peak_11638	22.4	12	0.00607	1.87	0.534759	UP	promoter-TSS (NR_037858)	NM_001207051	481	23332	NM_015282	CLASP1	0.903038
chr2	239148562	239148773	3_NTT1_cutoff_0.02_peak_12210	76.8	41	6.51e-07	1.87	0.534759	UP	promoter-TSS (NM_018645)	NM_001282434	97	55502	NM_018645	HES6	0.903038
chr20	60718710	60719038	1_NT1_cutoff_0.02_peak_16950	80.3	43	2.95e-07	1.87	0.534759	UP	promoter-TSS (NR_125981)	NM_198935	98	26039	NM_015558	SS18L1	0.903038
chr22	41864500	41864794	1_NT1_cutoff_0.02_peak_17862	164.9	88	3.08e-13	1.87	0.534759	UP	promoter-TSS (NM_032758)	NM_032758	61	84844	NM_032758	PHF5A	0.903038
chr22	42084679	42085192	3_NTT1_cutoff_0.02_peak_13324	196.8	105	1.49e-15	1.87	0.534759	UP	promoter-TSS (NM_005008)	NM_001003796	-23	4809	NM_005008	SNU13	0.903038
chr3	58291917	58292475	1_NT1_cutoff_0.02_peak_18629	195.9	105	2.8e-15	1.87	0.534759	UP	5' UTR (NM_001348712, exon 1 of 5)	NM_007042	224	11102	NM_007042	RPP14	0.903038
chr3	180630101	180630775	3_NTT1_cutoff_0.02_peak_14370	183	98	2.25e-14	1.87	0.534759	UP	5' UTR (NM_005087, exon 1 of 17)	NM_005087	204	8087	NM_005087	FXR1	0.903038
chr4	103940537	103941075	3_NTT1_cutoff_0.02_peak_14919	123.4	66	2.41e-10	1.87	0.534759	UP	promoter-TSS (NM_139173)	NM_001100874	90	150159	NM_139173	SLC9B1	0.903038
chr5	6632934	6633280	1_NT1_cutoff_0.02_peak_20367	155.4	83	1.14e-12	1.87	0.534759	UP	promoter-TSS (NM_001324322)	NM_001047	-328	6715	NM_001047	SRD5A1	0.903038
chr5	126853211	126853785	3_NTT1_cutoff_0.02_peak_15468	162.3	87	4.54e-13	1.87	0.534759	UP	intron (NM_130809, intron 1 of 8)	NM_130809	197	133619	NM_130809	PRRC1	0.903038
chr5	140026661	140027596	1_NT1_cutoff_0.02_peak_21060	291.7	156	3.43e-22	1.87	0.534759	UP	promoter-TSS (NM_006083)	NM_002488	241	4695	NM_002488	NDUFA2	0.903038
chr6	25962907	25963260	3_NTT1_cutoff_0.02_peak_16223	69	37	1.67e-06	1.87	0.534759	UP	intron (NM_006355, intron 1 of 7)	NM_006355	167	10475	NM_006355	TRIM38	0.903038
chr6	83902802	83903215	1_NT1_cutoff_0.02_peak_22256	112.2	60	1.33e-09	1.87	0.534759	UP	promoter-TSS (NM_033411)	NM_001199919	3	5238	NM_015599	PGM3	0.903038
chr7	66146716	66147417	1_NT1_cutoff_0.02_peak_23474	275.3	147	3.13e-21	1.87	0.534759	UP	promoter-TSS (NM_001287060)	NR_104676	-11	27342	NM_014504	RABGEF1	0.903038
chr7	105172414	105172972	3_NTT1_cutoff_0.02_peak_17767	147.6	79	5.4e-12	1.87	0.534759	UP	non-coding (NR_144478, exon 1 of 14)	NM_021930	165	60561	NM_021930	RINT1	0.903038
chr1	1310359	1311147	1_NT1_cutoff_0.02_peak_82	368.5	198	2.64e-27	1.86	0.537634	UP	promoter-TSS (NM_017900)	NM_017900	65	54998	NM_017900	AURKAIP1	0.895303
chr1	36022810	36023093	3_NTT1_cutoff_0.02_peak_549	109.6	59	3.71e-09	1.86	0.537634	UP	promoter-TSS (NM_024874)	NM_024874	85	79932	NM_024874	KIAA0319L	0.895303
chr1	100731502	100732003	1_NT1_cutoff_0.02_peak_1437	135.5	73	5.56e-11	1.86	0.537634	UP	promoter-TSS (NM_003729)	NR_110435	-23	100506007	NR_110434	RTCA-AS1	0.895303
chr10	97889957	97890462	3_NTT1_cutoff_0.02_peak_2952	119.1	64	5.26e-10	1.86	0.537634	UP	promoter-TSS (NM_001330734)	NM_001330734	-169	9849	NM_014803	ZNF518A	0.895303
chr11	925727	926049	3_NTT1_cutoff_0.02_peak_3226	94.9	51	4.52e-08	1.86	0.537634	UP	promoter-TSS (NM_001242837)	NR_144509	79	161	NM_012305	AP2A2	0.895303

## Sheet: ChIPseq-RNAseq_NTF
chr	Start	End	PeakID	Treatment Tags	Control Tags	Fold DOWN	Fold UP	p-value	Entrez ID	Nearest Refseq	Nearest PromoterID	Gene name	RNA_seq	ChIP_seq	Status (RNAseq/ChIPseq)
chr11	113930597	113930892	1_NT1_cutoff_0.02_peak_5348	0.9	63	1	0.01	100	7704	NM_006006	NM_001354750	ZBTB16	0.797183	-6.64386	ND
chr1	94991622	95009052	1_NT1_cutoff_0.02_peak_1411	291.7	12532	1	0.02	50	2152	NM_001993	NM_001993	F3	-5.12976	-5.64386	DD
chr17	66287281	66288536	1_NT1_cutoff_0.02_peak_11847	10.4	381	1	0.03	33.3333	22901	NM_014960	NM_001352909	ARSG	0.44313	-5.05889	ND
chr1	153528917	153539481	1_NT1_cutoff_0.02_peak_1791	438.5	14880	1	0.03	33.3333	6273	NM_005978	NM_005978	S100A2	-1.06872	-5.05889	ND
chr1	209600662	209608738	1_NT1_cutoff_0.02_peak_2617	366	13327	1	0.03	33.3333	406988	NR_029622	NR_029622	MIR205	-2.66627	-5.05889	DD
chr2	113586010	113594562	1_NT1_cutoff_0.02_peak_15429	107.9	3890	1	0.03	33.3333	3553	NM_000576	NM_000576	IL1B	-4.65503	-5.05889	DD
chr6	130339665	130339816	1_NT1_cutoff_0.02_peak_22469	0.9	21	1	0.04	25	84456	NM_032438	NM_032438	L3MBTL3	-2.35122	-4.64386	DD
chr9	2157748	2157948	1_NT1_cutoff_0.02_peak_25310	1.7	32	1	0.05	20	6595	NM_003070	NM_001289398	SMARCA2	2.00906	-4.32193	UD
chr2	96011815	96012283	1_NT1_cutoff_0.02_peak_15279	6	113	1	0.05	20	30818	NM_013434	NM_001034914	KCNIP3	-0.419903	-4.32193	ND
chr1	29563874	29564109	1_NT1_cutoff_0.02_peak_607	1.7	33	1	0.05	20	10076	NM_005704	NM_001195001	PTPRU	-0.93154	-4.32193	ND
chr12	66216345	66223037	1_NT1_cutoff_0.02_peak_6459	151	2752	1	0.05	20	204010	NR_026825	NR_026825	RPSAP52	-2.10343	-4.32193	DD
chr8	128222001	128232969	1_NT1_cutoff_0.02_peak_25005	174.3	3720	1	0.05	20	100507056	NR_108049	NR_108049	CCAT1	-2.20321	-4.32193	DD
chr7	1126784	1126933	1_NT1_cutoff_0.02_peak_22991	0.9	16	1	0.05	20	2852	NM_001505	NM_001505	GPER1	-2.40881	-4.32193	DD
chr21	46961622	46962672	1_NT1_cutoff_0.02_peak_17327	12.9	266	1	0.05	20	6573	NM_003056	NM_194255	SLC19A1	-3.24311	-4.32193	DD
chr8	128748347	128748899	3_NTT1_cutoff_0.02_peak_18499	92.4	2002	1	0.05	20	4609	NM_002467	NM_002467	MYC	-4.31293	-4.32193	DD
chr10	54073678	54079310	1_NT1_cutoff_0.02_peak_3421	111.3	2371	1	0.05	20	22943	NM_012242	NM_012242	DKK1	-8.47224	-4.32193	DD
chr20	62168177	62168395	1_NT1_cutoff_0.02_peak_17000	1.7	29	1	0.06	16.6667	5753	NM_005975	NM_001256358	PTK6	0.487631	-4.05889	ND
chr1	209781371	209827680	1_NT1_cutoff_0.02_peak_2619	1604.5	28263	1	0.06	16.6667	100422894	NR_036213	NR_036213	MIR4260	0.0791702	-4.05889	ND
chr7	116163967	116164163	1_NT1_cutoff_0.02_peak_23947	0.9	15	1	0.06	16.6667	857	NM_001753	NM_001753	CAV1	-1.19406	-4.05889	ND
chr1	153522528	153522935	1_NT1_cutoff_0.02_peak_1784	7.8	134	1	0.06	16.6667	6274	NM_002960	NM_002960	S100A3	-1.23097	-4.05889	DD
chr5	34656065	34656669	1_NT1_cutoff_0.02_peak_20428	6	106	1	0.06	16.6667	26064	NM_015577	NM_015577	RAI14	-1.59202	-4.05889	DD
chr2	235860619	235860801	1_NT1_cutoff_0.02_peak_16147	1.7	30	1	0.06	16.6667	23677	NM_014521	NM_014521	SH3BP4	-1.82782	-4.05889	DD
chr11	122073830	122074048	1_NT1_cutoff_0.02_peak_5479	1.7	31	1	0.06	16.6667	399959	NR_024430	NR_137181	MIR100HG	-2.5615	-4.05889	DD
chr17	38171095	38179947	1_NT1_cutoff_0.02_peak_11212	369.4	6337	1	0.06	16.6667	1440	NM_000759	NM_172219	CSF3	-4.34821	-4.05889	DD
chr4	74961643	74965414	1_NT1_cutoff_0.02_peak_19834	121.7	2089	1	0.06	16.6667	2920	NM_002089	NM_002089	CXCL2	-4.43653	-4.05889	DD
chr12	47472313	47475415	1_NT1_cutoff_0.02_peak_5954	44.9	809	1	0.06	16.6667	347902	NM_181847	NM_181847	AMIGO2	-5.26679	-4.05889	DD
chr4	119273976	119274132	1_NT1_cutoff_0.02_peak_20053	1.7	26	1	0.07	14.2857	8492	NM_003619	NM_003619	PRSS12	1.1408	-3.8365	ND
chr1	43996269	43998080	1_NT1_cutoff_0.02_peak_962	38	518	1	0.07	14.2857	5792	NM_002840	NM_130440	PTPRF	1.10055	-3.8365	ND
chr17	73716826	73724827	1_NT1_cutoff_0.02_peak_11938	189	2789	1	0.07	14.2857	3691	NM_000213	NM_001005619	ITGB4	0.984852	-3.8365	ND
chr11	68518751	68519052	1_NT1_cutoff_0.02_peak_5080	2.6	37	1	0.07	14.2857	9633	NM_004923	NM_001039656	TESMIN	0.275235	-3.8365	ND
chr16	57126258	57126583	1_NT1_cutoff_0.02_peak_9972	3.5	49	1	0.07	14.2857	221184	NM_152727	NM_152727	CPNE2	-0.796919	-3.8365	ND
chr20	35201917	35202209	1_NT1_cutoff_0.02_peak_16668	3.5	52	1	0.07	14.2857	60436	NM_021809	NM_021809	TGIF2	-1.48856	-3.8365	DD
chr12	52867000	52867617	1_NT1_cutoff_0.02_peak_6064	8.6	120	1	0.07	14.2857	286887	NM_173086	NM_173086	KRT6C	-2.4902	-3.8365	DD
chr20	62711024	62711428	1_NT1_cutoff_0.02_peak_17052	3.5	53	1	0.07	14.2857	10287	NM_005873	NM_001039467	RGS19	-3.19657	-3.8365	DD
chr9	112542254	112542530	1_NT1_cutoff_0.02_peak_25884	3.5	49	1	0.07	14.2857	445815	NM_007203	NM_007203	PALM2-AKAP2	-3.80735	-3.8365	DD
chr1	159915630	159915910	1_NT1_cutoff_0.02_peak_2128	1.7	26	1	0.07	14.2857	57549	NM_020789	NM_001135050	IGSF9	-3.99765	-3.8365	DD
chr12	52845441	52845966	1_NT1_cutoff_0.02_peak_6060	6.9	101	1	0.07	14.2857	3854	NM_005555	NM_005555	KRT6B	-4.35717	-3.8365	DD
chr7	559641	559881	1_NT1_cutoff_0.02_peak_22967	2.6	34	1	0.08	12.5	441307	NR_033963	NR_033963	HRAT92	2.23879	-3.64386	UD
chr3	99358243	99358820	1_NT1_cutoff_0.02_peak_18698	5.2	66	1	0.08	12.5	1295	NM_001850	NM_001850	COL8A1	0.0697307	-3.64386	ND
chr12	51611759	51612277	1_NT1_cutoff_0.02_peak_6036	5.2	69	1	0.08	12.5	5463	NM_002702	NR_147050	POU6F1	-0.131865	-3.64386	ND
chr17	48712057	48713182	1_NT1_cutoff_0.02_peak_11617	14.7	182	1	0.08	12.5	8714	NM_003786	NM_003786	ABCC3	-0.444585	-3.64386	ND
chr16	81129406	81130056	1_NT1_cutoff_0.02_peak_10253	9.5	114	1	0.08	12.5	2653	NM_004483	NR_033249	GCSH	-0.728601	-3.64386	ND
chr8	76319392	76319849	1_NT1_cutoff_0.02_peak_24663	6	73	1	0.08	12.5	3174	NM_004133	NM_001330561	HNF4G	-1	-3.64386	ND
chr7	116164260	116168354	1_NT1_cutoff_0.02_peak_23948	82.9	1038	1	0.08	12.5	857	NM_001753	NM_001172896	CAV1	-1.19406	-3.64386	ND
chr10	6019009	6019423	1_NT1_cutoff_0.02_peak_3081	3.5	46	1	0.08	12.5	3601	NM_002189	NM_172200	IL15RA	-1.20503	-3.64386	DD
chr7	73867242	73867417	1_NT1_cutoff_0.02_peak_23536	1.7	23	1	0.08	12.5	9569	NM_005685	NM_005685	GTF2IRD1	-1.31842	-3.64386	DD
chr6	73331509	73332566	1_NT1_cutoff_0.02_peak_22205	11.2	141	1	0.08	12.5	56479	NM_019842	NM_019842	KCNQ5	-1.67807	-3.64386	DD
chr12	64239104	64239355	1_NT1_cutoff_0.02_peak_6418	2.6	31	1	0.08	12.5	57522	NM_020762	NM_020762	SRGAP1	-2.05039	-3.64386	DD
chr3	127541690	127542213	1_NT1_cutoff_0.02_peak_18847	7.8	92	1	0.08	12.5	11343	NM_007283	NM_001003794	MGLL	-2.10098	-3.64386	DD
chr12	93963481	93966016	1_NT1_cutoff_0.02_peak_6690	69.9	824	1	0.08	12.5	8835	NM_003877	NM_001270468	SOCS2	-2.41761	-3.64386	DD
chr10	61469371	61469587	1_NT1_cutoff_0.02_peak_3434	2.6	34	1	0.08	12.5	220963	NM_194298	NM_001323981	SLC16A9	-2.61218	-3.64386	DD
chr4	124318978	124319991	1_NT1_cutoff_0.02_peak_20093	11.2	139	1	0.08	12.5	10252	NM_005841	NM_001258039	SPRY1	-3.10128	-3.64386	DD
chr11	35639326	35642166	1_NT1_cutoff_0.02_peak_4525	72.5	920	1	0.08	12.5	24147	NM_014344	NM_014344	FJX1	-3.37058	-3.64386	DD
chr15	90343979	90358260	1_NT1_cutoff_0.02_peak_9110	183.8	2085	1	0.09	11.1111	290	NM_001150	NM_001150	ANPEP	0.114504	-3.47393	ND
chr18	57364446	57364594	1_NT1_cutoff_0.02_peak_12574	1.7	20	1	0.09	11.1111	147372	NM_133459	NM_133459	CCBE1	0.0305883	-3.47393	ND
chr15	43985025	43985198	1_NT1_cutoff_0.02_peak_8631	1.7	19	1	0.09	11.1111	548596	NM_001015001	NM_001321927	CKMT1A	-0.0883588	-3.47393	ND
chr3	53880235	53880461	1_NT1_cutoff_0.02_peak_18575	3.5	37	1	0.09	11.1111	55349	NM_018397	NM_018397	CHDH	-0.147104	-3.47393	ND
chr10	3109607	3110006	1_NT1_cutoff_0.02_peak_3028	10.4	114	1	0.09	11.1111	5214	NM_002627	NM_001323068	PFKP	-0.15174	-3.47393	ND
chr17	39773894	39780973	1_NT1_cutoff_0.02_peak_11259	271	3152	1	0.09	11.1111	3872	NM_000422	NM_000422	KRT17	-0.327349	-3.47393	ND
chr15	99192211	99192498	1_NT1_cutoff_0.02_peak_9200	3.5	37	1	0.09	11.1111	3480	NM_000875	NM_000875	IGF1R	-0.43109	-3.47393	ND
chr12	52626917	52627097	3_NTT1_cutoff_0.02_peak_4488	48.3	529	1	0.09	11.1111	3855	NM_005556	NM_005556	KRT7	-0.575727	-3.47393	ND
chr10	47746828	47749994	1_NT1_cutoff_0.02_peak_3359	43.2	477	1	0.09	11.1111	728113	NM_001630	NM_001098845	ANXA8L1	-0.629073	-3.47393	ND
chr1	234613540	234615128	1_NT1_cutoff_0.02_peak_2871	74.2	794	1	0.09	11.1111	6894	NM_005646	NM_005646	TARBP1	-0.635462	-3.47393	ND
chr4	22517314	22518006	1_NT1_cutoff_0.02_peak_19667	15.5	176	1	0.09	11.1111	166647	NM_145290	NM_145290	ADGRA3	-0.698965	-3.47393	ND
chr2	17719728	17722135	1_NT1_cutoff_0.02_peak_14682	34.5	377	1	0.09	11.1111	7447	NM_003385	NM_003385	VSNL1	-0.881172	-3.47393	ND
chr17	38255557	38256213	1_NT1_cutoff_0.02_peak_11217	17.3	182	1	0.09	11.1111	9572	NM_021724	NM_021724	NR1D1	-0.968522	-3.47393	ND
chr10	82213542	82213791	1_NT1_cutoff_0.02_peak_3646	2.6	28	1	0.09	11.1111	81619	NM_030927	NM_001351268	TSPAN14	-1.53862	-3.47393	DD
chr15	31618970	31619990	1_NT1_cutoff_0.02_peak_8494	9.5	100	1	0.09	11.1111	51621	NM_015995	NM_001302461	KLF13	-1.73912	-3.47393	DD
chr2	192109615	192109789	1_NT1_cutoff_0.02_peak_15778	1.7	20	1	0.09	11.1111	4430	NM_012223	NM_001130158	MYO1B	-1.82816	-3.47393	DD
chr22	50964542	50964823	3_NTT1_cutoff_0.02_peak_13430	16.4	178	1	0.09	11.1111	9997	NM_005138	NM_001169110	SCO2	-1.86743	-3.47393	DD
chr6	130340019	130340346	1_NT1_cutoff_0.02_peak_22470	4.3	46	1	0.09	11.1111	84456	NM_032438	NM_001346551	L3MBTL3	-2.35122	-3.47393	DD
chr11	122049334	122052393	1_NT1_cutoff_0.02_peak_5476	40.6	448	1	0.09	11.1111	399959	NR_024430	NR_137184	MIR100HG	-2.5615	-3.47393	DD
chr6	107435297	107437358	1_NT1_cutoff_0.02_peak_22364	35.4	398	1	0.09	11.1111	57673	NM_001080450	NM_001080450	BEND3	-3.09906	-3.47393	DD
chr22	45097998	45098277	1_NT1_cutoff_0.02_peak_17959	4.3	48	1	0.09	11.1111	55615	NM_015366	NM_181333	PRR5	-3.35119	-3.47393	DD
chr11	76494185	76495003	1_NT1_cutoff_0.02_peak_5195	8.6	96	1	0.09	11.1111	25987	NM_015516	NM_015516	TSKU	-9.4818	-3.47393	DD
chr11	113931402	113932305	1_NT1_cutoff_0.02_peak_5350	15.5	149	1	0.1	10	7704	NM_006006	NM_001018011	ZBTB16	0.797183	-3.32193	ND
chr6_mann_hap4	2200143	2200300	1_NT1_cutoff_0.02_peak_22814	0.9	9	1	0.1	10	780	NM_001954	NM_001297654	DDR1	0.709037	-3.32193	ND
chr11	1855350	1857110	1_NT1_cutoff_0.02_peak_4247	33.7	354	1	0.1	10	90019	NM_138567	NM_138567	SYT8	0.589815	-3.32193	ND
chr2	102972215	102972369	1_NT1_cutoff_0.02_peak_15335	2.6	26	1	0.1	10	8809	NM_003855	NM_003855	IL18R1	0.455679	-3.32193	ND
chr16	82660495	82662953	1_NT1_cutoff_0.02_peak_10259	54.4	529	1	0.1	10	1012	NM_001257	NM_001257	CDH13	0.351157	-3.32193	ND
chr11	9779484	9780574	1_NT1_cutoff_0.02_peak_4360	21.6	211	1	0.1	10	283104	NR_036485	NR_036485	SBF2-AS1	0.332936	-3.32193	ND
chr13	21278012	21278488	1_NT1_cutoff_0.02_peak_7166	10.4	106	1	0.1	10	53342	NM_138284	NM_138284	IL17D	0.321928	-3.32193	ND
chr4	174089179	174090591	1_NT1_cutoff_0.02_peak_20257	17.3	169	1	0.1	10	51809	NM_017423	NM_017423	GALNT7	0.284615	-3.32193	ND
chrX	109245860	109246018	1_NT1_cutoff_0.02_peak_26775	2.6	25	1	0.1	10	84187	NM_017698	NM_001353851	TMEM164	0.265894	-3.32193	ND
chr10	99474089	99474357	3_NTT1_cutoff_0.02_peak_2990	33.7	323	1	0.1	10	83742	NM_031484	NM_031484	MARVELD1	0.212376	-3.32193	ND
chr11	1857773	1859952	1_NT1_cutoff_0.02_peak_4249	22.4	226	1	0.1	10	7136	NM_003282	NM_003282	TNNI2	0.124497	-3.32193	ND
chr16	447133	447534	1_NT1_cutoff_0.02_peak_9271	6	59	1	0.1	10	4833	NM_005009	NM_005009	NME4	-0.055231	-3.32193	ND
chr4	122301171	122302318	1_NT1_cutoff_0.02_peak_20068	14.7	143	1	0.1	10	84109	NM_198179	NM_198179	QRFPR	-0.0935307	-3.32193	ND
chr5	138609684	138609946	3_NTT1_cutoff_0.02_peak_15697	49.2	484	1	0.1	10	724102	NR_003141	NR_003141	SNHG4	-0.179834	-3.32193	ND
chr18	74206640	74207141	1_NT1_cutoff_0.02_peak_12627	5.2	54	1	0.1	10	9658	NM_014643	NM_014643	ZNF516	-0.194378	-3.32193	ND
chr10	48255210	48258256	1_NT1_cutoff_0.02_peak_3375	57.8	561	1	0.1	10	653145	NM_001040084	NM_001271703	ANXA8	-0.530652	-3.32193	ND
chr1	159750653	159751239	1_NT1_cutoff_0.02_peak_2119	17.3	180	1	0.1	10	54935	NM_017823	NM_001319658	DUSP23	-0.543216	-3.32193	ND
chr13	44361028	44361844	1_NT1_cutoff_0.02_peak_7288	9.5	98	1	0.1	10	55068	NM_017993	NM_001347967	ENOX1	-0.584963	-3.32193	ND
chr11	64071992	64072628	1_NT1_cutoff_0.02_peak_4822	13.8	135	1	0.1	10	2101	NM_004451	NM_001282451	ESRRA	-0.910601	-3.32193	ND
chr16	691792	693122	1_NT1_cutoff_0.02_peak_9287	23.3	238	1	0.1	10	84331	NM_032371	NR_138609	MCRIP2	-0.94575	-3.32193	ND
chr11	369399	369580	1_NT1_cutoff_0.02_peak_4136	2.6	26	1	0.1	10	338707	NM_178537	NM_178537	B4GALNT4	-1.1418	-3.32193	ND
chr8	145638339	145639085	1_NT1_cutoff_0.02_peak_25244	28.5	286	1	0.1	10	55630	NM_017767	NM_001280557	SLC39A4	-1.25771	-3.32193	DD
chr14	105633643	105634542	1_NT1_cutoff_0.02_peak_8439	13.8	143	1	0.1	10	3714	NM_002226	NM_145159	JAG2	-1.49347	-3.32193	DD
chr7	116139067	116141210	1_NT1_cutoff_0.02_peak_23938	57.8	555	1	0.1	10	858	NM_001233	NM_001206748	CAV2	-1.85431	-3.32193	DD
chr9	136024423	136024675	1_NT1_cutoff_0.02_peak_26194	5.2	52	1	0.1	10	5900	NM_006266	NM_001042368	RALGDS	-1.95814	-3.32193	DD
chr6	130340510	130341043	1_NT1_cutoff_0.02_peak_22471	7.8	77	1	0.1	10	84456	NM_032438	NM_001346550	L3MBTL3	-2.35122	-3.32193	DD
chr19	34286231	34288808	1_NT1_cutoff_0.02_peak_13675	55.2	574	1	0.1	10	79047	NM_024076	NM_001129994	KCTD15	-2.54893	-3.32193	DD
chr2	43453434	43454018	3_NTT1_cutoff_0.02_peak_11200	80.3	792	1	0.1	10	678	NM_006887	NM_006887	ZFP36L2	-2.76014	-3.32193	DD
chr8	110656868	110657350	1_NT1_cutoff_0.02_peak_24866	11.2	109	1	0.1	10	55638	NM_017786	NM_001099755	SYBU	-3.39776	-3.32193	DD
chr3	189507370	189508237	1_NT1_cutoff_0.02_peak_19374	10.4	100	1	0.1	10	8626	NM_003722	NM_001114982	TP63	-4.36194	-3.32193	DD
chr7	107641781	107643965	1_NT1_cutoff_0.02_peak_23917	40.6	354	1	0.11	9.09091	3912	NM_002291	NM_002291	LAMB1	3.68756	-3.18442	UD
chr20	43280217	43280656	1_NT1_cutoff_0.02_peak_16755	6	53	1	0.11	9.09091	100	NM_000022	NM_001322050	ADA	1.3388	-3.18442	UD
chr18	11980169	11981059	1_NT1_cutoff_0.02_peak_12362	19	178	1	0.11	9.09091	3613	NM_014214	NM_014214	IMPA2	0.60447	-3.18442	ND
chr1	95285843	95286074	1_NT1_cutoff_0.02_peak_1419	3.5	32	1	0.11	9.09091	126969	NM_152369	NM_001258340	SLC44A3	0.584963	-3.18442	ND
chr11	307838	311721	1_NT1_cutoff_0.02_peak_4129	124.3	1082	1	0.11	9.09091	10581	NM_006435	NM_006435	IFITM2	0.504733	-3.18442	ND
chr17	73757354	73760345	1_NT1_cutoff_0.02_peak_11960	45.7	410	1	0.11	9.09091	2584	NM_000154	NM_000154	GALK1	0.485427	-3.18442	ND
chrX	135229381	135229694	1_NT1_cutoff_0.02_peak_26858	5.2	48	1	0.11	9.09091	2273	NM_001449	NM_001159703	FHL1	0.434021	-3.18442	ND
chr12	6309467	6309732	1_NT1_cutoff_0.02_peak_5610	2.6	23	1	0.11	9.09091	928	NM_001769	NM_001769	CD9	0.36505	-3.18442	ND
chrX	109245423	109245681	1_NT1_cutoff_0.02_peak_26774	3.5	32	1	0.11	9.09091	84187	NM_017698	NM_001353849	TMEM164	0.265894	-3.18442	ND
chr17	80290140	80291780	1_NT1_cutoff_0.02_peak_12245	28.5	257	1	0.11	9.09091	6398	NM_003004	NM_003004	SECTM1	0.0750217	-3.18442	ND
chr10	124220958	124221287	1_NT1_cutoff_0.02_peak_4043	11.2	104	1	0.11	9.09091	5654	NM_002775	NM_002775	HTRA1	0.00934567	-3.18442	ND
chr2	201170688	201170892	1_NT1_cutoff_0.02_peak_15856	1.7	16	1	0.11	9.09091	26010	NM_015535	NM_001282743	SPATS2L	-0.0157587	-3.18442	ND
chr17	17206434	17207250	1_NT1_cutoff_0.02_peak_10800	20.7	196	1	0.11	9.09091	56953	NM_020201	NM_020201	NT5M	-0.111508	-3.18442	ND
chr16	56642350	56642855	3_NTT1_cutoff_0.02_peak_7601	183.8	1599	1	0.11	9.09091	4502	NM_005953	NM_005953	MT2A	-0.203441	-3.18442	ND
chr8	26434281	26435519	1_NT1_cutoff_0.02_peak_24431	40.6	386	1	0.11	9.09091	1808	NM_001386	NM_001386	DPYSL2	-0.267165	-3.18442	ND
chr12	52913880	52914385	3_NTT1_cutoff_0.02_peak_4489	59.6	521	1	0.11	9.09091	3852	NM_000424	NM_000424	KRT5	-0.432843	-3.18442	ND
chr2	85640940	85641309	1_NT1_cutoff_0.02_peak_15225	8.6	79	1	0.11	9.09091	822	NM_001747	NM_001256139	CAPG	-0.489252	-3.18442	ND
chr17	29035928	29036195	1_NT1_cutoff_0.02_peak_11006	5.2	46	1	0.11	9.09091	440423	NR_024187	NR_144394	SUZ12P1	-0.505558	-3.18442	ND
chr17	79197062	79197367	1_NT1_cutoff_0.02_peak_12118	4.3	40	1	0.11	9.09091	22994	NM_014984	NM_014984	CEP131	-1.02254	-3.18442	ND
chrX	37544930	37545214	1_NT1_cutoff_0.02_peak_26457	4.3	38	1	0.11	9.09091	7504	NM_021083	NM_021083	XK	-1.15673	-3.18442	ND
chr3	185538742	185538969	1_NT1_cutoff_0.02_peak_19322	2.6	24	1	0.11	9.09091	10644	NM_006548	NM_001291872	IGF2BP2	-1.45423	-3.18442	DD
chr2	10183686	10184103	1_NT1_cutoff_0.02_peak_14633	6.9	65	1	0.11	9.09091	8462	NM_003597	NM_001177716	KLF11	-2.16773	-3.18442	DD
chr18	74331710	74332272	1_NT1_cutoff_0.02_peak_12631	8.6	77	1	0.11	9.09091	400660	NR_120419	NR_120419	LINC00683	-2.58496	-3.18442	DD
chr17	41909900	41910712	1_NT1_cutoff_0.02_peak_11388	16.4	147	1	0.11	9.09091	4356	NM_001932	NM_001932	MPP3	-2.80521	-3.18442	DD
chr15	96874473	96875954	1_NT1_cutoff_0.02_peak_9190	26.8	244	1	0.11	9.09091	7026	NM_021005	NM_001145156	NR2F2	-2.88057	-3.18442	DD
chr14	91883870	91885271	1_NT1_cutoff_0.02_peak_8265	33.7	298	1	0.11	9.09091	440193	NM_001080414	NM_001080414	CCDC88C	-3.07039	-3.18442	DD
chr19	44283100	44285502	1_NT1_cutoff_0.02_peak_14005	37.1	327	1	0.11	9.09091	3783	NM_002250	NM_002250	KCNN4	-3.11155	-3.18442	DD
chr14	77493951	77495375	1_NT1_cutoff_0.02_peak_8210	32.8	299	1	0.11	9.09091	64207	NM_024496	NM_024496	IRF2BPL	-3.49737	-3.18442	DD
chr6	1389744	1390450	1_NT1_cutoff_0.02_peak_21558	8.6	80	1	0.11	9.09091	2295	NM_001452	NM_001452	FOXF2	-4.48477	-3.18442	DD
chr6	170599805	170600098	1_NT1_cutoff_0.02_peak_22672	3.5	28	1	0.12	8.33333	84498	NM_032448	NM_001286379	FAM120B	0.911627	-3.05889	ND
chrX	102631822	102631970	1_NT1_cutoff_0.02_peak_26745	2.6	21	1	0.12	8.33333	27018	NM_014380	NM_014380	BEX3	0.75713	-3.05889	ND
chr6	125475361	125475581	1_NT1_cutoff_0.02_peak_22456	3.5	30	1	0.12	8.33333	7164	NM_003287	NM_001003395	TPD52L1	0.655942	-3.05889	ND
chr7	21467009	21467548	1_NT1_cutoff_0.02_peak_23140	12.1	98	1	0.12	8.33333	6671	NM_003112	NM_001326542	SP4	0.626632	-3.05889	ND
chr17	34122445	34122821	1_NT1_cutoff_0.02_peak_11090	3.5	28	1	0.12	8.33333	79148	NM_024302	NM_032950	MMP28	0.406483	-3.05889	ND
chr1	44871784	44872107	1_NT1_cutoff_0.02_peak_983	2.6	21	1	0.12	8.33333	55182	NM_018150	NM_001319956	RNF220	0	-3.05889	ND
chr19	3365636	3367713	1_NT1_cutoff_0.02_peak_12950	57	461	1	0.12	8.33333	4782	NM_005597	NM_005597	NFIC	-0.662514	-3.05889	ND
chr1	94712758	94712946	1_NT1_cutoff_0.02_peak_1408	4.3	35	1	0.12	8.33333	9411	NM_004815	NM_001328664	ARHGAP29	-0.717857	-3.05889	ND
chr18	24127870	24130983	1_NT1_cutoff_0.02_peak_12452	76	611	1	0.12	8.33333	284252	NM_198991	NM_001351443	KCTD1	-1.39824	-3.05889	DD
chr9	112083157	112083520	1_NT1_cutoff_0.02_peak_25882	5.2	44	1	0.12	8.33333	54566	NM_018424	NM_018424	EPB41L4B	-1.66686	-3.05889	DD
chr2	192109989	192111284	1_NT1_cutoff_0.02_peak_15779	76.8	625	1	0.12	8.33333	4430	NM_012223	NM_012223	MYO1B	-1.82816	-3.05889	DD
chr4	166793726	166794093	1_NT1_cutoff_0.02_peak_20240	4.3	35	1	0.12	8.33333	7092	NM_012464	NM_001204760	TLL1	-2.09954	-3.05889	DD
chr17	27920730	27921117	1_NT1_cutoff_0.02_peak_10997	4.3	35	1	0.12	8.33333	124930	NM_152345	NM_152345	ANKRD13B	-2.76165	-3.05889	DD
chr10	5708311	5708678	1_NT1_cutoff_0.02_peak_3065	11.2	96	1	0.12	8.33333	79754	NM_024701	NR_024581	ASB13	-2.99788	-3.05889	DD
chr20	23029187	23032276	1_NT1_cutoff_0.02_peak_16445	69	573	1	0.12	8.33333	7056	NM_000361	NM_000361	THBD	-3.30191	-3.05889	DD
chr22	37956140	37960761	1_NT1_cutoff_0.02_peak_17692	78.5	652	1	0.12	8.33333	11135	NM_152243	NM_152243	CDC42EP1	-3.38571	-3.05889	DD
chr4	74734734	74736443	1_NT1_cutoff_0.02_peak_19830	53.5	459	1	0.12	8.33333	2919	NM_001511	NM_001511	CXCL1	-5.03699	-3.05889	DD
chr11	76495168	76495396	1_NT1_cutoff_0.02_peak_5196	4.3	35	1	0.12	8.33333	25987	NM_015516	NM_001318478	TSKU	-9.4818	-3.05889	DD
chr7	73149041	73149274	1_NT1_cutoff_0.02_peak_23521	3.5	27	1	0.13	7.69231	171022	NR_026690	NR_026690	ABHD11-AS1	7.87036	-2.94342	UD
chr3	13461581	13461851	1_NT1_cutoff_0.02_peak_18161	11.2	85	1	0.13	7.69231	23225	NM_024923	NM_024923	NUP210	1.79134	-2.94342	UD
chr12	29936053	29936476	1_NT1_cutoff_0.02_peak_5893	12.9	97	1	0.13	7.69231	83857	NM_175861	NM_001193451	TMTC1	0.82752	-2.94342	ND
chr19	41107813	41108642	1_NT1_cutoff_0.02_peak_13895	16.4	130	1	0.13	7.69231	8425	NM_003573	NM_001042545	LTBP4	0.767862	-2.94342	ND
chr21	46346899	46348876	1_NT1_cutoff_0.02_peak_17317	46.6	367	1	0.13	7.69231	3689	NM_000211	NM_001127491	ITGB2	0.657768	-2.94342	ND
chr5	82768272	82771205	1_NT1_cutoff_0.02_peak_20708	95.8	710	1	0.13	7.69231	1462	NM_004385	NM_001126336	VCAN	0.390349	-2.94342	ND
chr4	41362546	41362962	1_NT1_cutoff_0.02_peak_19729	7.8	58	1	0.13	7.69231	22998	NM_014988	NM_001330784	LIMCH1	0.198761	-2.94342	ND
chr11	317482	321026	1_NT1_cutoff_0.02_peak_4133	155.4	1203	1	0.13	7.69231	10410	NM_021034	NR_049759	IFITM3	0.196828	-2.94342	ND
chr8	144450968	144451151	1_NT1_cutoff_0.02_peak_25089	4.3	34	1	0.13	7.69231	114822	NM_052924	NM_052924	RHPN1	0.123631	-2.94342	ND
chr22	35936298	35936455	1_NT1_cutoff_0.02_peak_17640	2.6	20	1	0.13	7.69231	23551	NM_014310	NM_014310	RASD2	0	-2.94342	ND
chr1	31885933	31889542	1_NT1_cutoff_0.02_peak_621	69.9	534	1	0.13	7.69231	347735	NM_018565	NM_001199039	SERINC2	-0.0311241	-2.94342	ND
chr15	45315244	45316129	1_NT1_cutoff_0.02_peak_8674	15.5	121	1	0.13	7.69231	6652	NM_003104	NM_003104	SORD	-0.0466301	-2.94342	ND
chr21	33783692	33785338	1_NT1_cutoff_0.02_peak_17109	46.6	352	1	0.13	7.69231	59271	NM_058187	NM_001320744	EVA1C	-0.22605	-2.94342	ND
chr1	20126764	20126949	1_NT1_cutoff_0.02_peak_378	2.6	20	1	0.13	7.69231	255104	NM_181719	NM_001349114	TMCO4	-0.660708	-2.94342	ND
chr1	214454145	214455299	1_NT1_cutoff_0.02_peak_2659	57.8	444	1	0.13	7.69231	56950	NM_020197	NM_020197	SMYD2	-0.870587	-2.94342	ND
chr22	50969450	50969642	3_NTT1_cutoff_0.02_peak_13431	20.7	163	1	0.13	7.69231	1890	NM_001953	NM_001257989	TYMP	-0.877481	-2.94342	ND
chr8	12050771	12051781	1_NT1_cutoff_0.02_peak_24346	28.5	226	1	0.13	7.69231	85002	NM_001083537	NM_001083537	FAM86B1	-0.943416	-2.94342	ND
chr11	12308650	12308957	1_NT1_cutoff_0.02_peak_4412	5.2	39	1	0.13	7.69231	84953	NM_032867	NM_032867	MICALCL	-1.09803	-2.94342	ND
chr7	21985000	21985622	1_NT1_cutoff_0.02_peak_23142	21.6	162	1	0.13	7.69231	55536	NM_018719	NM_018719	CDCA7L	-1.4419	-2.94342	DD
chr1	179560514	179561152	1_NT1_cutoff_0.02_peak_2302	15.5	117	1	0.13	7.69231	163589	NM_173533	NM_173533	TDRD5	-1.59724	-2.94342	DD
chr16	67571473	67571708	1_NT1_cutoff_0.02_peak_10051	2.6	20	1	0.13	7.69231	79567	NM_024519	NM_001193524	RIPOR1	-1.77352	-2.94342	DD
chrY	21154437	21154964	1_NT1_cutoff_0.02_peak_27010	16.4	125	1	0.13	7.69231	100133941	NM_013230	NM_001359084	CD24	-1.81413	-2.94342	DD
chr11	47207712	47208281	1_NT1_cutoff_0.02_peak_4574	12.1	90	1	0.13	7.69231	29763	NM_016223	NM_016223	PACSIN3	-2.01309	-2.94342	DD
chr6	10413102	10413435	3_NTT1_cutoff_0.02_peak_16146	29.3	232	1	0.13	7.69231	7020	NM_003220	NM_001032280	TFAP2A	-2.45551	-2.94342	DD
chr2	113541982	113542152	3_NTT1_cutoff_0.02_peak_11621	29.3	229	1	0.13	7.69231	3552	NM_000575	NM_000575	IL1A	-2.70656	-2.94342	DD
chr2	228735537	228736377	1_NT1_cutoff_0.02_peak_16089	19.9	153	1	0.13	7.69231	164781	NM_178821	NR_138459	DAW1	-3.60975	-2.94342	DD
chr12	49365291	49365612	1_NT1_cutoff_0.02_peak_5990	5.2	41	1	0.13	7.69231	7480	NM_003394	NM_003394	WNT10B	-3.69539	-2.94342	DD
chr4	74903983	74904627	1_NT1_cutoff_0.02_peak_19832	31.1	238	1	0.13	7.69231	2921	NM_002090	NM_002090	CXCL3	-4.55821	-2.94342	DD
chr18	55711404	55711731	1_NT1_cutoff_0.02_peak_12562	6.9	51	1	0.14	7.14286	23327	NM_015277	NM_001144967	NEDD4L	2.26527	-2.8365	UD
chr3	33155189	33157065	1_NT1_cutoff_0.02_peak_18242	49.2	348	1	0.14	7.14286	10491	NM_006371	NM_006371	CRTAP	0.840739	-2.8365	ND
chr7	129142272	129142658	1_NT1_cutoff_0.02_peak_24016	13.8	102	1	0.14	7.14286	100287482	NM_001195243	NM_001195243	SMKR1	0.824913	-2.8365	ND
chr13	114565969	114566605	1_NT1_cutoff_0.02_peak_7575	16.4	116	1	0.14	7.14286	2621	NM_000820	NM_000820	GAS6	0.510205	-2.8365	ND
chr4	183065103	183066243	1_NT1_cutoff_0.02_peak_20275	28.5	210	1	0.14	7.14286	90768	NR_027107	NR_027107	LOC90768	0.334419	-2.8365	ND
chr2	119981081	119981615	1_NT1_cutoff_0.02_peak_15456	8.6	62	1	0.14	7.14286	55240	NM_018234	NM_182915	STEAP3	0.232822	-2.8365	ND
chr18	21976628	21978224	1_NT1_cutoff_0.02_peak_12442	38	276	1	0.14	7.14286	114876	NM_018030	NM_080597	OSBPL1A	0.153791	-2.8365	ND
chr22	24236387	24236888	3_NTT1_cutoff_0.02_peak_13047	41.4	301	1	0.14	7.14286	4282	NM_002415	NM_002415	MIF	0.151281	-2.8365	ND
chr17	80188080	80189247	3_NTT1_cutoff_0.02_peak_9270	98.4	696	1	0.14	7.14286	9123	NM_004207	NM_001042423	SLC16A3	0.124737	-2.8365	ND
chr19	49141119	49141576	1_NT1_cutoff_0.02_peak_14233	12.1	87	1	0.14	7.14286	653677	NR_004401	NR_004401	SEC1P	-0.0241125	-2.8365	ND
chr4	8160399	8160630	1_NT1_cutoff_0.02_peak_19624	5.2	37	1	0.14	7.14286	84448	NM_032432	NM_001130085	ABLIM2	-0.0557878	-2.8365	ND
chr6	44191198	44191701	1_NT1_cutoff_0.02_peak_22126	8.6	61	1	0.14	7.14286	2030	NM_004955	NM_001078177	SLC29A1	-0.150883	-2.8365	ND
chr2	163101014	163102038	1_NT1_cutoff_0.02_peak_15600	26.8	190	1	0.14	7.14286	2191	NM_004460	NM_004460	FAP	-0.326593	-2.8365	ND
chr14	71275458	71275732	1_NT1_cutoff_0.02_peak_8130	6	42	1	0.14	7.14286	4293	NM_033141	NM_001284230	MAP3K9	-0.395255	-2.8365	ND
chr2	27341502	27342081	1_NT1_cutoff_0.02_peak_14772	12.1	87	1	0.14	7.14286	10669	NM_006569	NM_001166239	CGREF1	-0.593928	-2.8365	ND
chr10	60272619	60272918	1_NT1_cutoff_0.02_peak_3433	6.9	48	1	0.14	7.14286	80114	NM_001080512	NM_001080512	BICC1	-0.754888	-2.8365	ND
chr19	4909379	4911343	1_NT1_cutoff_0.02_peak_13023	56.1	411	1	0.14	7.14286	29128	NM_013282	NM_013282	UHRF1	-0.977008	-2.8365	ND
chr9	132513959	132515633	1_NT1_cutoff_0.02_peak_26138	46.6	329	1	0.14	7.14286	9536	NM_004878	NM_004878	PTGES	-1.02726	-2.8365	ND
chr1	234040308	234040624	1_NT1_cutoff_0.02_peak_2868	11.2	79	1	0.14	7.14286	148641	NM_173508	NM_173508	SLC35F3	-1.04264	-2.8365	ND
chr20	48807798	48808010	3_NTT1_cutoff_0.02_peak_12681	25	177	1	0.14	7.14286	101927559	NR_125739	NR_125739	CEBPB-AS1	-1.12516	-2.8365	ND
chr2	165477727	165478267	1_NT1_cutoff_0.02_peak_15605	11.2	80	1	0.14	7.14286	2888	NM_004490	NM_004490	GRB14	-1.15612	-2.8365	ND
chr9	132934506	132934769	1_NT1_cutoff_0.02_peak_26150	3.5	25	1	0.14	7.14286	23413	NM_014286	NM_014286	NCS1	-1.44736	-2.8365	DD
chr2	27308595	27309858	1_NT1_cutoff_0.02_peak_14767	31.1	217	1	0.14	7.14286	3795	NM_000221	NM_000221	KHK	-1.47426	-2.8365	DD
chr16	23160432	23161120	1_NT1_cutoff_0.02_peak_9691	14.7	102	1	0.14	7.14286	57478	NM_020718	NM_020718	USP31	-1.7195	-2.8365	DD
chr8	10587366	10588247	1_NT1_cutoff_0.02_peak_24302	17.3	120	1	0.14	7.14286	83595	NM_031439	NM_031439	SOX7	-1.9462	-2.8365	DD
chr12	4383963	4384442	1_NT1_cutoff_0.02_peak_5601	6.9	50	1	0.14	7.14286	103752584	NR_125790	NR_149146	CCND2-AS1	-2.00727	-2.8365	DD
chr3	127541176	127541575	1_NT1_cutoff_0.02_peak_18846	6	43	1	0.14	7.14286	11343	NM_007283	NM_007283	MGLL	-2.10098	-2.8365	DD
chr1	110453170	110453751	1_NT1_cutoff_0.02_peak_1482	9.5	70	1	0.14	7.14286	1435	NM_000757	NM_172210	CSF1	-2.11151	-2.8365	DD
chr5	133860885	133863787	1_NT1_cutoff_0.02_peak_20913	130.3	942	1	0.14	7.14286	23338	NM_015288	NM_015288	JADE2	-2.27711	-2.8365	DD
chr11	67571890	67572920	1_NT1_cutoff_0.02_peak_5059	30.2	213	1	0.14	7.14286	645332	NR_024249	NR_024249	FAM86C2P	-2.28716	-2.8365	DD
chr1	53791528	53793426	1_NT1_cutoff_0.02_peak_1115	48.3	357	1	0.14	7.14286	7804	NM_004631	NM_001018054	LRP8	-2.4518	-2.8365	DD
chr7	100424841	100425264	1_NT1_cutoff_0.02_peak_23787	11.2	83	1	0.14	7.14286	2050	NM_004444	NM_004444	EPHB4	-2.54133	-2.8365	DD
chr11	122026712	122027189	1_NT1_cutoff_0.02_peak_5470	6.9	49	1	0.14	7.14286	399959	NR_024430	NR_137188	MIR100HG	-2.5615	-2.8365	DD
chr9	38392476	38393062	1_NT1_cutoff_0.02_peak_25580	14.7	107	1	0.14	7.14286	219	NM_000692	NM_000692	ALDH1B1	-2.72331	-2.8365	DD
chr1	234745849	234746100	3_NTT1_cutoff_0.02_peak_2371	46.6	337	1	0.14	7.14286	359948	NM_182972	NM_001077397	IRF2BP2	-3.05778	-2.8365	DD
chr16	4321981	4322205	3_NTT1_cutoff_0.02_peak_7231	22.4	158	1	0.14	7.14286	7023	NM_003223	NM_003223	TFAP4	-3.08119	-2.8365	DD
chrX	45710751	45711401	1_NT1_cutoff_0.02_peak_26508	22.4	160	1	0.14	7.14286	401585	NR_125365	NR_125365	LOC401585	-3.23185	-2.8365	DD
chr2	174219524	174219695	3_NTT1_cutoff_0.02_peak_11795	15.5	109	1	0.14	7.14286	83879	NM_031942	NM_145810	CDCA7	-4.67469	-2.8365	DD
chr3	155523392	155523584	1_NT1_cutoff_0.02_peak_19088	4.3	28	1	0.15	6.66667	285315	NM_173657	NM_001308229	C3orf33	8.39232	-2.73697	UD
chr8	80680532	80680999	1_NT1_cutoff_0.02_peak_24668	9.5	65	1	0.15	6.66667	101927067	NR_125410	NR_125410	LINC01607	5.42626	-2.73697	UD
chr10	8095486	8095798	1_NT1_cutoff_0.02_peak_3105	12.1	79	1	0.15	6.66667	399717	NM_207423	NR_024256	GATA3-AS1	4.16993	-2.73697	UD
chr9	2158212	2158751	1_NT1_cutoff_0.02_peak_25311	10.4	71	1	0.15	6.66667	6595	NM_003070	NM_001289400	SMARCA2	2.00906	-2.73697	UD
chr5	175969327	175970756	1_NT1_cutoff_0.02_peak_21380	44	300	1	0.15	6.66667	54825	NM_017675	NM_001171976	CDHR2	1.64386	-2.73697	UD
chr10	104210282	104210568	3_NTT1_cutoff_0.02_peak_3050	31.1	214	1	0.15	6.66667	100505761	NR_038937	NR_038937	RPARP-AS1	1.52062	-2.73697	UD
chr11	32456912	32457217	1_NT1_cutoff_0.02_peak_4484	6	40	1	0.15	6.66667	51352	NM_015855	NR_120548	WT1-AS	0.951297	-2.73697	ND
chr11	67777388	67778584	1_NT1_cutoff_0.02_peak_5061	34.5	235	1	0.15	6.66667	221	NM_000694	NM_000694	ALDH3B1	0.878308	-2.73697	ND
chr12	6484287	6487103	1_NT1_cutoff_0.02_peak_5639	76.8	523	1	0.15	6.66667	6337	NM_001038	NM_001038	SCNN1A	0.829195	-2.73697	ND
chr17	40540787	40541078	1_NT1_cutoff_0.02_peak_11315	12.9	84	1	0.15	6.66667	6774	NM_003150	NM_139276	STAT3	0.785625	-2.73697	ND
chr10	97667399	97668028	1_NT1_cutoff_0.02_peak_3707	15.5	103	1	0.15	6.66667	387707	NM_001001732	NM_001130446	CC2D2B	0.487326	-2.73697	ND
chr8	17013785	17014086	1_NT1_cutoff_0.02_peak_24357	6.9	47	1	0.15	6.66667	51201	NM_016353	NM_016353	ZDHHC2	0.197646	-2.73697	ND
chr10	120966345	120967069	1_NT1_cutoff_0.02_peak_4021	21.6	146	1	0.15	6.66667	2869	NM_005308	NM_005308	GRK5	0.192645	-2.73697	ND
chr7	43798043	43798530	1_NT1_cutoff_0.02_peak_23295	11.2	74	1	0.15	6.66667	644	NM_000712	NM_000712	BLVRA	0.138525	-2.73697	ND
chr11	1861412	1861724	1_NT1_cutoff_0.02_peak_4252	5.2	35	1	0.15	6.66667	7136	NM_003282	NM_001145841	TNNI2	0.124497	-2.73697	ND
chr11	111847598	111847757	1_NT1_cutoff_0.02_peak_5329	5.2	34	1	0.15	6.66667	85458	NM_033425	NM_033425	DIXDC1	0.0884688	-2.73697	ND
chr2	29136613	29136824	1_NT1_cutoff_0.02_peak_14841	2.6	17	1	0.15	6.66667	692209	NR_003074	NR_003074	SNORD92	0	-2.73697	ND
chr4	115519895	115520498	1_NT1_cutoff_0.02_peak_20050	11.2	73	1	0.15	6.66667	7368	NM_003360	NM_001322114	UGT8	-0.0218705	-2.73697	ND
chr12	56324945	56325352	1_NT1_cutoff_0.02_peak_6239	6.9	45	1	0.15	6.66667	1606	NM_001345	NM_001345	DGKA	-0.0790151	-2.73697	ND
chr3	29322993	29324588	1_NT1_cutoff_0.02_peak_18224	31.9	211	1	0.15	6.66667	27303	NM_014483	NM_001003792	RBMS3	-0.390206	-2.73697	ND
chr6	150464068	150464368	1_NT1_cutoff_0.02_peak_22577	8.6	59	1	0.15	6.66667	81706	NM_030949	NM_030949	PPP1R14C	-0.429445	-2.73697	ND
chr6	42419981	42421205	1_NT1_cutoff_0.02_peak_22042	42.3	284	1	0.15	6.66667	55809	NM_018415	NM_033502	TRERF1	-0.700986	-2.73697	ND
chr19	36000067	36001475	1_NT1_cutoff_0.02_peak_13728	61.3	402	1	0.15	6.66667	93099	NM_033317	NR_147959	DMKN	-0.747555	-2.73697	ND
chr1	65613177	65614027	1_NT1_cutoff_0.02_peak_1178	16.4	112	1	0.15	6.66667	205	NM_013410	NM_001005353	AK4	-0.85319	-2.73697	ND
chr2	74210669	74212813	1_NT1_cutoff_0.02_peak_15158	63.9	427	1	0.15	6.66667	200424	NM_001287491	NM_001287491	TET3	-0.918183	-2.73697	ND
chr11	12131707	12133523	1_NT1_cutoff_0.02_peak_4405	55.2	369	1	0.15	6.66667	9645	NM_014632	NM_001346294	MICAL2	-1.07495	-2.73697	ND
chr22	29278950	29279265	1_NT1_cutoff_0.02_peak_17504	6	41	1	0.15	6.66667	84133	NM_032173	NM_001206998	ZNRF3	-1.09072	-2.73697	ND
chr22	20119826	20120069	1_NT1_cutoff_0.02_peak_17411	3.5	23	1	0.15	6.66667	29801	NM_013373	NM_001185024	ZDHHC8	-1.21085	-2.73697	DD
chr16	3019741	3024075	1_NT1_cutoff_0.02_peak_9454	80.3	518	1	0.15	6.66667	124222	NM_152341	NM_001284513	PAQR4	-1.28894	-2.73697	DD
chr1	153575501	153589876	1_NT1_cutoff_0.02_peak_1796	769.9	5220	1	0.15	6.66667	140576	NM_080388	NM_001317008	S100A16	-1.56726	-2.73697	DD
chr9	101558645	101558901	1_NT1_cutoff_0.02_peak_25840	6.9	45	1	0.15	6.66667	203286	NM_173551	NM_173551	ANKS6	-1.62449	-2.73697	DD
chr12	53613998	53614301	1_NT1_cutoff_0.02_peak_6128	4.3	28	1	0.15	6.66667	5916	NM_000966	NM_001243732	RARG	-1.66269	-2.73697	DD
chr11	128562714	128564283	1_NT1_cutoff_0.02_peak_5539	38.8	255	1	0.15	6.66667	2313	NM_002017	NM_001167681	FLI1	-1.87643	-2.73697	DD
chr2	74775877	74777470	1_NT1_cutoff_0.02_peak_15192	46.6	315	1	0.15	6.66667	84695	NM_032603	NM_001289165	LOXL3	-2.08616	-2.73697	DD
chr1	150253996	150254746	1_NT1_cutoff_0.02_peak_1674	29.3	198	1	0.15	6.66667	148523	NM_144697	NM_001300839	CIART	-2.11775	-2.73697	DD
chr16	57570120	57570477	1_NT1_cutoff_0.02_peak_9981	4.3	29	1	0.15	6.66667	92922	NM_033212	NM_033212	CCDC102A	-2.23786	-2.73697	DD
chr6	30687998	30688397	1_NT1_cutoff_0.02_peak_21836	7.8	52	1	0.15	6.66667	203068	NM_178014	NR_120608	TUBB	-2.49666	-2.73697	DD
chr11	122072838	122073464	1_NT1_cutoff_0.02_peak_5478	12.1	78	1	0.15	6.66667	399959	NR_024430	NR_024430	MIR100HG	-2.5615	-2.73697	DD
chr4	123747760	123749424	1_NT1_cutoff_0.02_peak_20087	51.8	355	1	0.15	6.66667	2247	NM_002006	NM_001361665	FGF2	-2.84645	-2.73697	DD
chr9	35905964	35908832	1_NT1_cutoff_0.02_peak_25524	80.3	519	1	0.15	6.66667	646962	NM_001039792	NM_001039792	HRCT1	-2.99735	-2.73697	DD
chr8	123792535	123793201	1_NT1_cutoff_0.02_peak_24883	18.1	122	1	0.15	6.66667	22882	NM_014943	NM_014943	ZHX2	-3.05311	-2.73697	DD
chr7	558070	559583	1_NT1_cutoff_0.02_peak_22966	25	170	1	0.15	6.66667	5154	NM_002607	NM_033023	PDGFA	-3.31066	-2.73697	DD
chr4	15935015	15940121	1_NT1_cutoff_0.02_peak_19657	80.3	534	1	0.15	6.66667	9982	NM_005130	NM_005130	FGFBP1	-3.39357	-2.73697	DD
chr14	69261389	69261650	3_NTT1_cutoff_0.02_peak_6040	18.1	122	1	0.15	6.66667	677	NM_004926	NM_001244698	ZFP36L1	-3.74597	-2.73697	DD
chr1	201368276	201368847	1_NT1_cutoff_0.02_peak_2470	27.6	190	1	0.15	6.66667	3898	NM_005558	NM_005558	LAD1	-3.83427	-2.73697	DD
chr1	15250517	15250826	1_NT1_cutoff_0.02_peak_269	6.9	45	1	0.15	6.66667	23254	NM_015209	NM_001018000	KAZN	-4.21189	-2.73697	DD
chr4	73433845	73433999	1_NT1_cutoff_0.02_peak_19823	4.3	27	1	0.16	6.25	9508	NM_014243	NM_014243	ADAMTS3	2	-2.64386	UD
chr11	61582558	61584401	1_NT1_cutoff_0.02_peak_4685	28.5	180	1	0.16	6.25	9415	NM_004265	NM_001281501	FADS2	1.20919	-2.64386	UD
chr2	12856663	12857118	1_NT1_cutoff_0.02_peak_14676	6.9	42	1	0.16	6.25	28951	NM_021643	NM_021643	TRIB2	0.904422	-2.64386	ND
chr13	93879961	93880563	1_NT1_cutoff_0.02_peak_7452	10.4	64	1	0.16	6.25	10082	NM_005708	NM_005708	GPC6	0.825971	-2.64386	ND
chr5	10307295	10308038	1_NT1_cutoff_0.02_peak_20384	16.4	104	1	0.16	6.25	134147	NM_138809	NM_138809	CMBL	0.755752	-2.64386	ND
chr7	47621544	47621734	1_NT1_cutoff_0.02_peak_23365	3.5	21	1	0.16	6.25	64759	NM_022748	NM_022748	TNS3	0.698619	-2.64386	ND
chr2	47596181	47596922	1_NT1_cutoff_0.02_peak_14980	23.3	143	1	0.16	6.25	4072	NM_002354	NM_002354	EPCAM	0.559079	-2.64386	ND
chr16	21312055	21313637	1_NT1_cutoff_0.02_peak_9665	41.4	265	1	0.16	6.25	400508	NM_001101368	NR_026675	CRYM-AS1	0.307982	-2.64386	ND
chr7	130126058	130126885	1_NT1_cutoff_0.02_peak_24027	25.9	162	1	0.16	6.25	4232	NM_002402	NM_001253902	MEST	0.302452	-2.64386	ND
chr6	33588018	33590097	1_NT1_cutoff_0.02_peak_21885	47.5	288	1	0.16	6.25	3710	NM_002224	NM_002224	ITPR3	0.139485	-2.64386	ND
chr12	58141717	58141950	1_NT1_cutoff_0.02_peak_6386	5.2	33	1	0.16	6.25	102466729	NR_106817	NR_106817	MIR6759	0	-2.64386	ND
chr5	54469196	54469344	1_NT1_cutoff_0.02_peak_20512	3.5	21	1	0.16	6.25	166979	NM_152623	NM_001170402	CDC20B	0	-2.64386	ND
chr3	164914636	164914800	1_NT1_cutoff_0.02_peak_19144	7.8	50	1	0.16	6.25	22865	NM_014926	NM_014926	SLITRK3	0	-2.64386	ND
chr1	8938045	8939184	3_NTT1_cutoff_0.02_peak_102	208	1265	1	0.16	6.25	2023	NM_001428	NM_001353346	ENO1	-0.0647936	-2.64386	ND
chr19	38794397	38796805	1_NT1_cutoff_0.02_peak_13815	143.3	871	1	0.16	6.25	64073	NM_022125	NM_033520	C19orf33	-0.195424	-2.64386	ND
chr12	109535293	109535624	1_NT1_cutoff_0.02_peak_6819	6	37	1	0.16	6.25	7374	NM_003362	NM_080911	UNG	-0.252766	-2.64386	ND
chr16	71660731	71661006	1_NT1_cutoff_0.02_peak_10187	7.8	48	1	0.16	6.25	91862	NM_052858	NM_001271329	MARVELD3	-0.312446	-2.64386	ND
chr8	9007710	9009413	1_NT1_cutoff_0.02_peak_24295	53.5	341	1	0.16	6.25	79660	NM_024607	NM_024607	PPP1R3B	-0.320634	-2.64386	ND
chr3	58419841	58419990	1_NT1_cutoff_0.02_peak_18635	6	37	1	0.16	6.25	5162	NM_000925	NM_000925	PDHB	-0.399931	-2.64386	ND
chr3	71630745	71633314	1_NT1_cutoff_0.02_peak_18669	56.1	347	1	0.16	6.25	27086	NM_032682	NM_001349341	FOXP1	-0.490476	-2.64386	ND
chr2	98206097	98207361	1_NT1_cutoff_0.02_peak_15303	31.1	195	1	0.16	6.25	57730	NM_020970	NM_001353337	ANKRD36B	-0.503805	-2.64386	ND
chr19	18111767	18112249	1_NT1_cutoff_0.02_peak_13540	24.2	148	1	0.16	6.25	27106	NM_015683	NM_001025604	ARRDC2	-0.780902	-2.64386	ND
chr17	76713264	76713435	1_NT1_cutoff_0.02_peak_12062	3.5	21	1	0.16	6.25	9267	NM_004762	NM_001292019	CYTH1	-0.899018	-2.64386	ND
chr19	45280873	45281641	1_NT1_cutoff_0.02_peak_14036	45.7	279	1	0.16	6.25	23624	NM_012116	NM_012116	CBLC	-1.13871	-2.64386	ND
chr3	75483439	75484491	1_NT1_cutoff_0.02_peak_18677	29.3	178	1	0.16	6.25	692099	NR_024241	NR_024241	FAM86DP	-1.15268	-2.64386	ND
chr4	24913950	24914410	1_NT1_cutoff_0.02_peak_19676	15.5	96	1	0.16	6.25	91050	NM_173463	NM_001130726	CCDC149	-1.28758	-2.64386	DD
chr5	64776337	64776784	1_NT1_cutoff_0.02_peak_20561	5.2	33	1	0.16	6.25	11174	NM_197941	NR_135689	ADAMTS6	-1.34792	-2.64386	DD
chr16	27324490	27327834	1_NT1_cutoff_0.02_peak_9718	123.4	794	1	0.16	6.25	3566	NM_000418	NM_000418	IL4R	-1.4172	-2.64386	DD
chrX	47442619	47443726	1_NT1_cutoff_0.02_peak_26537	24.2	148	1	0.16	6.25	7076	NM_003254	NM_003254	TIMP1	-1.45063	-2.64386	DD
chr9	140353586	140353889	1_NT1_cutoff_0.02_peak_26335	13.8	89	1	0.16	6.25	26012	NM_015537	NM_015537	NSMF	-1.68969	-2.64386	DD
chr12	64237417	64239025	1_NT1_cutoff_0.02_peak_6417	52.6	336	1	0.16	6.25	57522	NM_020762	NM_001346201	SRGAP1	-2.05039	-2.64386	DD
chr11	17373832	17375632	1_NT1_cutoff_0.02_peak_4440	40.6	249	1	0.16	6.25	374383	NM_001009913	NM_001202439	NCR3LG1	-2.10367	-2.64386	DD
chr20	62610641	62611381	1_NT1_cutoff_0.02_peak_17045	13.8	85	1	0.16	6.25	140700	NM_080621	NM_080621	SAMD10	-2.37402	-2.64386	DD
chr14	73392734	73392957	1_NT1_cutoff_0.02_peak_8135	4.3	27	1	0.16	6.25	26094	NM_015604	NM_015604	DCAF4	-2.42626	-2.64386	DD
chr1	45792466	45792786	1_NT1_cutoff_0.02_peak_1014	11.2	72	1	0.16	6.25	84842	NM_032756	NM_032756	HPDL	-2.55673	-2.64386	DD
chr21	44847311	44848149	1_NT1_cutoff_0.02_peak_17259	41.4	265	1	0.16	6.25	102724428	NM_001320643	NM_001320643	SIK1B	-2.71814	-2.64386	DD
chr17	16343633	16344137	3_NTT1_cutoff_0.02_peak_8211	43.2	273	1	0.16	6.25	26800	NR_002744	NR_002744	SNORD49A	-8.43463	-2.64386	DD
chr10	102758952	102759553	1_NT1_cutoff_0.02_peak_3816	12.1	74	1	0.16	6.25	84445	NM_032429	NM_001318100	LZTS2	-9.14211	-2.64386	DD
chr20	42815618	42816960	1_NT1_cutoff_0.02_peak_16746	22.4	134	1	0.17	5.88235	57158	NM_020433	NM_175913	JPH2	0.644194	-2.55639	ND
chr15	64673443	64673781	1_NT1_cutoff_0.02_peak_8813	8.6	51	1	0.17	5.88235	9768	NM_014736	NM_014736	PCLAF	0.609048	-2.55639	ND
chr18	21269313	21269611	1_NT1_cutoff_0.02_peak_12429	12.1	71	1	0.17	5.88235	3909	NM_000227	NM_198129	LAMA3	0.337173	-2.55639	ND
chr8	144099782	144100516	1_NT1_cutoff_0.02_peak_25075	25.9	151	1	0.17	5.88235	4061	NM_002346	NM_002346	LY6E	0.285707	-2.55639	ND
chr2	242641052	242641673	3_NTT1_cutoff_0.02_peak_12240	80.3	467	1	0.17	5.88235	84289	NM_032329	NM_032329	ING5	-0.0671142	-2.55639	ND
chr10	16859735	16860032	1_NT1_cutoff_0.02_peak_3165	11.2	66	1	0.17	5.88235	6251	NM_012425	NM_152724	RSU1	-0.190912	-2.55639	ND
chr6	56819329	56820237	1_NT1_cutoff_0.02_peak_22167	13.8	80	1	0.17	5.88235	221336	NM_152731	NM_001318539	BEND6	-0.267104	-2.55639	ND
chr6	42016205	42016572	1_NT1_cutoff_0.02_peak_22036	11.2	67	1	0.17	5.88235	896	NM_001760	NM_001136126	CCND3	-0.287908	-2.55639	ND
chr5	176873100	176875228	1_NT1_cutoff_0.02_peak_21401	120	704	1	0.17	5.88235	80758	NM_030567	NM_001174101	PRR7	-0.311017	-2.55639	ND
chr15	74219789	74220369	1_NT1_cutoff_0.02_peak_8913	11.2	66	1	0.17	5.88235	100287616	NR_040066	NR_040067	LOXL1-AS1	-0.419154	-2.55639	ND
chr16	28223544	28223758	1_NT1_cutoff_0.02_peak_9729	3.5	20	1	0.17	5.88235	23214	NM_015171	NM_015171	XPO6	-0.568737	-2.55639	ND
chr6	125284025	125284218	1_NT1_cutoff_0.02_peak_22453	6	35	1	0.17	5.88235	7955	NR_026876	NR_026876	RNF217-AS1	-0.678072	-2.55639	ND
chr11	67771255	67771697	1_NT1_cutoff_0.02_peak_5060	9.5	55	1	0.17	5.88235	81622	NM_030930	NM_030930	UNC93B1	-0.77884	-2.55639	ND
chr3	127348067	127348222	1_NT1_cutoff_0.02_peak_18844	4.3	25	1	0.17	5.88235	50512	NM_015720	NM_015720	PODXL2	-0.786548	-2.55639	ND
chr1	155162610	155165065	1_NT1_cutoff_0.02_peak_1924	117.4	698	1	0.17	5.88235	693235	NR_030281	NR_030281	MIR92B	-0.919926	-2.55639	ND
chr17	9547905	9549017	1_NT1_cutoff_0.02_peak_10738	31.9	188	1	0.17	5.88235	124739	NM_153210	NM_001267576	USP43	-1	-2.55639	ND
chr3	159706506	159706707	1_NT1_cutoff_0.02_peak_19129	5.2	30	1	0.17	5.88235	3592	NM_000882	NM_000882	IL12A	-1.152	-2.55639	ND
chr22	45148238	45148677	1_NT1_cutoff_0.02_peak_17961	10.4	60	1	0.17	5.88235	23779	NM_181335	NM_181335	ARHGAP8	-1.40221	-2.55639	DD
chr17	15848464	15849532	1_NT1_cutoff_0.02_peak_10760	25.9	152	1	0.17	5.88235	136	NM_000676	NM_000676	ADORA2B	-1.43668	-2.55639	DD
chr10	6622297	6622618	1_NT1_cutoff_0.02_peak_3094	12.9	78	1	0.17	5.88235	439949	NR_036502	NR_036503	PRKCQ-AS1	-2.23799	-2.55639	DD
chr17	17109447	17109760	1_NT1_cutoff_0.02_peak_10796	12.1	72	1	0.17	5.88235	201164	NM_178836	NM_178836	PLD6	-2.30771	-2.55639	DD
chr15	90542765	90545906	1_NT1_cutoff_0.02_peak_9122	97.5	590	1	0.17	5.88235	374655	NM_198526	NM_198526	ZNF710	-2.34068	-2.55639	DD
chr8	19170875	19172095	1_NT1_cutoff_0.02_peak_24368	35.4	205	1	0.17	5.88235	63898	NM_022071	NM_001174159	SH2D4A	-2.66718	-2.55639	DD
chr17	3796082	3796372	1_NT1_cutoff_0.02_peak_10512	8.6	52	1	0.17	5.88235	84254	NM_032294	NM_032294	CAMKK1	-2.77864	-2.55639	DD
chr12	122460401	122461575	1_NT1_cutoff_0.02_peak_7004	29.3	171	1	0.17	5.88235	605	NM_020993	NM_001024808	BCL7A	-3.62923	-2.55639	DD
chr16	68269942	68270324	3_NTT1_cutoff_0.02_peak_7681	31.1	180	1	0.17	5.88235	80004	NM_024939	NM_024939	ESRP2	-3.63453	-2.55639	DD
chr20	18037490	18038495	1_NT1_cutoff_0.02_peak_16415	14.7	85	1	0.17	5.88235	58495	NM_021220	NM_021220	OVOL2	-4.6939	-2.55639	DD
chr12	59313289	59314429	1_NT1_cutoff_0.02_peak_6409	25	146	1	0.17	5.88235	121227	NM_153377	NM_153377	LRIG3	-6.54174	-2.55639	DD
chr1	156782947	156784877	1_NT1_cutoff_0.02_peak_2107	71.6	393	1	0.18	5.55556	4914	NM_002529	NM_001007792	NTRK1	3.32193	-2.47393	UD
chr2	25142590	25143491	1_NT1_cutoff_0.02_peak_14741	24.2	136	1	0.18	5.55556	109	NM_004036	NM_001320613	ADCY3	1.13743	-2.47393	ND
chr5	174150935	174151223	1_NT1_cutoff_0.02_peak_21359	7.8	42	1	0.18	5.55556	4488	NM_002449	NM_002449	MSX2	1.02702	-2.47393	ND
chr17	27224555	27224733	3_NTT1_cutoff_0.02_peak_8322	21.6	118	1	0.18	5.55556	2319	NM_004475	NM_004475	FLOT2	0.632084	-2.47393	ND
chr13	50265101	50265893	1_NT1_cutoff_0.02_peak_7339	21.6	120	1	0.18	5.55556	84650	NM_032565	NM_001278636	EBPL	0.580229	-2.47393	ND
chr15	90455819	90456324	1_NT1_cutoff_0.02_peak_9120	12.1	69	1	0.18	5.55556	348110	NM_182616	NM_182616	ARPIN	0.554722	-2.47393	ND
chr10	134350406	134350960	1_NT1_cutoff_0.02_peak_4102	15.5	84	1	0.18	5.55556	3632	NM_005539	NM_005539	INPP5A	0.517639	-2.47393	ND
chr17	78009493	78010045	1_NT1_cutoff_0.02_peak_12080	21.6	119	1	0.18	5.55556	125058	NM_019020	NM_019020	TBC1D16	0.394	-2.47393	ND
chr22	43548179	43548880	1_NT1_cutoff_0.02_peak_17933	21.6	122	1	0.18	5.55556	706	NM_000714	NM_001256530	TSPO	0.366718	-2.47393	ND
chr7	89783673	89783969	1_NT1_cutoff_0.02_peak_23637	7.8	43	1	0.18	5.55556	26872	NM_012449	NM_012449	STEAP1	0.326228	-2.47393	ND
chr4	10022612	10023247	1_NT1_cutoff_0.02_peak_19634	17.3	98	1	0.18	5.55556	56606	NM_020041	NM_020041	SLC2A9	0.252387	-2.47393	ND
chr10	128076955	128077291	1_NT1_cutoff_0.02_peak_4081	8.6	47	1	0.18	5.55556	8038	NM_003474	NM_001288973	ADAM12	0.190684	-2.47393	ND
chr15	99193123	99194029	1_NT1_cutoff_0.02_peak_9201	19.9	112	1	0.18	5.55556	104472848	NR_126453	NR_126453	IRAIN	0.172837	-2.47393	ND
chr7	1595032	1595997	1_NT1_cutoff_0.02_peak_23002	25.9	142	1	0.18	5.55556	202915	NM_152689	NM_001097620	TMEM184A	0.0397705	-2.47393	ND
chr11	416756	416920	1_NT1_cutoff_0.02_peak_4151	5.2	28	1	0.18	5.55556	59307	NM_021805	NM_021805	SIGIRR	0.0316096	-2.47393	ND
chr6	170124193	170124996	1_NT1_cutoff_0.02_peak_22666	24.2	136	1	0.18	5.55556	55274	NM_018288	NM_133325	PHF10	0.0276254	-2.47393	ND
chr2	145089036	145090420	1_NT1_cutoff_0.02_peak_15528	31.9	178	1	0.18	5.55556	79712	NM_024659	NM_001354362	GTDC1	-0.0790716	-2.47393	ND
chr16	432091	432305	1_NT1_cutoff_0.02_peak_9270	6	34	1	0.18	5.55556	100134368	NR_024453	NR_024453	LOC100134368	-0.149378	-2.47393	ND
chr10	3110133	3111859	1_NT1_cutoff_0.02_peak_3029	33.7	182	1	0.18	5.55556	5214	NM_002627	NM_001242339	PFKP	-0.15174	-2.47393	ND
chr17	26645350	26646655	1_NT1_cutoff_0.02_peak_10894	38.8	220	1	0.18	5.55556	27346	NM_014573	NM_014573	TMEM97	-0.204039	-2.47393	ND
chr3	110790031	110790371	1_NT1_cutoff_0.02_peak_18743	11.2	61	1	0.18	5.55556	25945	NM_015480	NM_001243286	NECTIN3	-0.239291	-2.47393	ND
chr17	39967696	39969596	1_NT1_cutoff_0.02_peak_11274	62.1	347	1	0.18	5.55556	10609	NM_006455	NM_006455	P3H4	-0.331056	-2.47393	ND
chr7	114563123	114563452	1_NT1_cutoff_0.02_peak_23931	4.3	24	1	0.18	5.55556	29969	NM_199072	NM_001166346	MDFIC	-0.363591	-2.47393	ND
chr16	28634417	28635026	1_NT1_cutoff_0.02_peak_9737	14.7	80	1	0.18	5.55556	6817	NM_001055	NM_177536	SULT1A1	-0.451238	-2.47393	ND
chr8	144416699	144417167	1_NT1_cutoff_0.02_peak_25088	14.7	80	1	0.18	5.55556	116447	NM_052963	NM_052963	TOP1MT	-0.837948	-2.47393	ND
chr3	197282428	197283081	1_NT1_cutoff_0.02_peak_19496	17.3	94	1	0.18	5.55556	622	NM_004051	NM_004051	BDH1	-0.989282	-2.47393	ND
chr20	32274010	32274274	1_NT1_cutoff_0.02_peak_16523	11.2	64	1	0.18	5.55556	1869	NM_005225	NM_005225	E2F1	-1.04439	-2.47393	ND
chr11	393415	395181	1_NT1_cutoff_0.02_peak_4137	71.6	390	1	0.18	5.55556	11187	NM_007183	NM_007183	PKP3	-1.0947	-2.47393	ND
chr13	27131721	27132125	1_NT1_cutoff_0.02_peak_7196	8.6	49	1	0.18	5.55556	10810	NM_006646	NM_001291965	WASF3	-1.32457	-2.47393	DD
chr17	39741641	39742158	1_NT1_cutoff_0.02_peak_11257	6	33	1	0.18	5.55556	3861	NM_000526	NM_000526	KRT14	-1.74011	-2.47393	DD
chr17	48423101	48424188	1_NT1_cutoff_0.02_peak_11595	31.1	177	1	0.18	5.55556	64132	NM_022167	NM_022167	XYLT2	-1.80735	-2.47393	DD
chr6	3751856	3752391	1_NT1_cutoff_0.02_peak_21586	15.5	88	1	0.18	5.55556	221749	NM_183373	NM_183373	PXDC1	-1.86853	-2.47393	DD
chr5	148651092	148652004	1_NT1_cutoff_0.02_peak_21142	20.7	112	1	0.18	5.55556	134265	NM_152406	NM_001323063	AFAP1L1	-2.08025	-2.47393	DD
chr2	20421015	20425214	1_NT1_cutoff_0.02_peak_14710	135.5	753	1	0.18	5.55556	6382	NM_002997	NM_002997	SDC1	-2.25918	-2.47393	DD
chr6_cox_hap2	2200061	2201907	1_NT1_cutoff_0.02_peak_22717	23.3	132	1	0.18	5.55556	203068	NM_178014	NM_001293216	TUBB	-2.49666	-2.47393	DD
chr8	143809119	143809441	1_NT1_cutoff_0.02_peak_25070	11.2	64	1	0.18	5.55556	51337	NM_016647	NM_016647	THEM6	-2.59194	-2.47393	DD
chr19	8428809	8429292	3_NTT1_cutoff_0.02_peak_9928	240.8	1357	1	0.18	5.55556	51129	NM_016109	NM_139314	ANGPTL4	-2.80402	-2.47393	DD
chr9	99417112	99417856	1_NT1_cutoff_0.02_peak_25782	21.6	117	1	0.18	5.55556	195827	NM_153698	NM_153698	AAED1	-3.54626	-2.47393	DD
chr16	54319409	54319847	1_NT1_cutoff_0.02_peak_9945	7.8	43	1	0.18	5.55556	79191	NM_024336	NM_024336	IRX3	-3.74946	-2.47393	DD
chr10	62703777	62704056	1_NT1_cutoff_0.02_peak_3444	6	33	1	0.18	5.55556	9886	NM_014836	NM_014836	RHOBTB1	-4.152	-2.47393	DD
chr17	73871671	73874877	1_NT1_cutoff_0.02_peak_11968	75.1	412	1	0.18	5.55556	91107	NM_033452	NM_033452	TRIM47	-5.31512	-2.47393	DD
chr4	156589105	156589302	1_NT1_cutoff_0.02_peak_20198	4.3	24	1	0.18	5.55556	2982	NM_000856	NM_001130684	GUCY1A1	-5.78136	-2.47393	DD
chr5	52776142	52776867	1_NT1_cutoff_0.02_peak_20503	8.6	47	1	0.18	5.55556	10468	NM_006350	NM_006350	FST	-5.94551	-2.47393	DD
chr10	102756720	102757653	1_NT1_cutoff_0.02_peak_3815	21.6	123	1	0.18	5.55556	84445	NM_032429	NM_032429	LZTS2	-9.14211	-2.47393	DD
chr1	223316567	223316860	1_NT1_cutoff_0.02_peak_2694	12.1	64	1	0.19	5.26316	7100	NM_003268	NM_003268	TLR5	5.52356	-2.39593	UD
chr7	73256650	73256942	1_NT1_cutoff_0.02_peak_23523	7.8	40	1	0.19	5.26316	155368	NM_152559	NM_152559	METTL27	2.6746	-2.39593	UD
chr3	171527875	171528587	1_NT1_cutoff_0.02_peak_19167	23.3	120	1	0.19	5.26316	5337	NM_002662	NM_001130081	PLD1	2.43296	-2.39593	UD
chr20	3786381	3789332	1_NT1_cutoff_0.02_peak_16335	62.1	335	1	0.19	5.26316	101929125	NR_109859	NR_109859	LINC01730	2.21681	-2.39593	UD
chr10	17270554	17277512	1_NT1_cutoff_0.02_peak_3169	92.4	477	1	0.19	5.26316	100507347	NR_108060	NR_108061	VIM-AS1	0.924194	-2.39593	ND
chr4	113739155	113739512	1_NT1_cutoff_0.02_peak_20045	8.6	45	1	0.19	5.26316	287	NM_001148	NM_001354255	ANK2	0.837943	-2.39593	ND
chr12	6482432	6483644	1_NT1_cutoff_0.02_peak_5637	17.3	91	1	0.19	5.26316	6337	NM_001038	NM_001159576	SCNN1A	0.829195	-2.39593	ND
chr11	842790	845069	1_NT1_cutoff_0.02_peak_4227	91.5	474	1	0.19	5.26316	7106	NM_003271	NM_001025234	TSPAN4	0.708618	-2.39593	ND
chr8	70746108	70746363	1_NT1_cutoff_0.02_peak_24641	6.9	37	1	0.19	5.26316	81796	NM_030958	NM_001146008	SLCO5A1	0.508147	-2.39593	ND
chr12	30948815	30949283	3_NTT1_cutoff_0.02_peak_4355	99.3	518	1	0.19	5.26316	100287314	NR_040245	NR_040245	LINC00941	0.322506	-2.39593	ND
chr1	12678105	12679294	1_NT1_cutoff_0.02_peak_266	44	230	1	0.19	5.26316	9249	NM_004753	NM_004753	DHRS3	0.184362	-2.39593	ND
chrX	131622837	131624195	1_NT1_cutoff_0.02_peak_26839	33.7	176	1	0.19	5.26316	55796	NM_018388	NM_001170704	MBNL3	0.0425605	-2.39593	ND
chr16	820801	821031	1_NT1_cutoff_0.02_peak_9312	3.5	18	1	0.19	5.26316	724032	NR_030384	NR_030384	MIR662	0	-2.39593	ND
chr16	50300444	50300620	1_NT1_cutoff_0.02_peak_9927	4.3	23	1	0.19	5.26316	113	NM_001114	NM_001286057	ADCY7	-0.0198448	-2.39593	ND
chr6	138482838	138483296	1_NT1_cutoff_0.02_peak_22513	19	102	1	0.19	5.26316	57221	NM_020340	NM_020340	ARFGEF3	-0.0995357	-2.39593	ND
chrX	153606447	153607158	1_NT1_cutoff_0.02_peak_26961	31.1	166	1	0.19	5.26316	2010	NM_000117	NM_000117	EMD	-0.123057	-2.39593	ND
chr12	51785183	51785683	1_NT1_cutoff_0.02_peak_6040	11.2	58	1	0.19	5.26316	11226	NM_007210	NM_007210	GALNT6	-0.210114	-2.39593	ND
chr8	37888368	37889297	1_NT1_cutoff_0.02_peak_24502	34.5	179	1	0.19	5.26316	1978	NM_004095	NM_004095	EIF4EBP1	-0.286872	-2.39593	ND
chr17	16256574	16256899	1_NT1_cutoff_0.02_peak_10779	18.1	96	1	0.19	5.26316	201161	NM_181716	NM_181716	CENPV	-0.327959	-2.39593	ND
chr12	6937524	6937795	1_NT1_cutoff_0.02_peak_5686	6.9	36	1	0.19	5.26316	10536	NM_014262	NM_014262	P3H3	-0.442872	-2.39593	ND
chr7	44122373	44122726	1_NT1_cutoff_0.02_peak_23312	11.2	58	1	0.19	5.26316	27434	NM_013284	NM_001284331	POLM	-0.444173	-2.39593	ND
chr7	150759073	150760507	1_NT1_cutoff_0.02_peak_24211	44	232	1	0.19	5.26316	6522	NM_003040	NM_001199694	SLC4A2	-0.619396	-2.39593	ND
chr3	99535945	99536915	1_NT1_cutoff_0.02_peak_18699	27.6	142	1	0.19	5.26316	84319	NM_032359	NM_032359	CMSS1	-0.695084	-2.39593	ND
chr15	66585553	66587067	1_NT1_cutoff_0.02_peak_8835	73.4	391	1	0.19	5.26316	115752	NM_133375	NM_001323944	DIS3L	-0.813904	-2.39593	ND
chr17	74496934	74497749	1_NT1_cutoff_0.02_peak_12002	25.9	138	1	0.19	5.26316	79651	NM_024599	NM_024599	RHBDF2	-0.840749	-2.39593	ND
chr17	8027156	8027539	1_NT1_cutoff_0.02_peak_10692	17.3	91	1	0.19	5.26316	84667	NM_032580	NM_001165967	HES7	-0.86148	-2.39593	ND
chr8	22454976	22456644	1_NT1_cutoff_0.02_peak_24393	68.2	350	1	0.19	5.26316	541565	NM_173686	NM_173686	C8orf58	-0.991262	-2.39593	ND
chr10	126849333	126850220	1_NT1_cutoff_0.02_peak_4069	37.1	191	1	0.19	5.26316	1488	NM_001329	NM_001083914	CTBP2	-1.63097	-2.39593	DD
chr9	27528864	27529286	1_NT1_cutoff_0.02_peak_25389	12.1	63	1	0.19	5.26316	79817	NM_024761	NM_024761	MOB3B	-1.65578	-2.39593	DD
chr9	136213788	136214231	1_NT1_cutoff_0.02_peak_26204	14.7	79	1	0.19	5.26316	6837	NM_006752	NM_133640	MED22	-2.0072	-2.39593	DD
chr8	86089073	86090279	1_NT1_cutoff_0.02_peak_24682	50.1	264	1	0.19	5.26316	1875	NM_001951	NM_001083588	E2F5	-2.14714	-2.39593	DD
chr8	12612750	12613514	1_NT1_cutoff_0.02_peak_24350	19.9	103	1	0.19	5.26316	91694	NM_152271	NM_152271	LONRF1	-2.30039	-2.39593	DD
chr6	10415512	10415728	3_NTT1_cutoff_0.02_peak_16147	50.9	262	1	0.19	5.26316	7020	NM_003220	NM_003220	TFAP2A	-2.45551	-2.39593	DD
chr8	8750855	8751323	1_NT1_cutoff_0.02_peak_24293	12.9	69	1	0.19	5.26316	9258	NM_004225	NM_004225	MFHAS1	-2.51502	-2.39593	DD
chr13	100633360	100634247	1_NT1_cutoff_0.02_peak_7483	21.6	112	1	0.19	5.26316	7546	NM_007129	NM_007129	ZIC2	-2.76988	-2.39593	DD
chr5	54522182	54523443	1_NT1_cutoff_0.02_peak_20513	35.4	191	1	0.19	5.26316	345643	NM_001190787	NM_001190787	MCIDAS	-3.50696	-2.39593	DD
chr10	11865283	11865580	3_NTT1_cutoff_0.02_peak_2549	53.5	279	1	0.19	5.26316	254427	NM_153256	NM_153256	PROSER2	-3.8201	-2.39593	DD
chr1	15479904	15480428	1_NT1_cutoff_0.02_peak_270	11.2	59	1	0.19	5.26316	55092	NM_018022	NM_001319665	TMEM51	-3.91917	-2.39593	DD
chr19	45250843	45252759	1_NT1_cutoff_0.02_peak_14032	49.2	263	1	0.19	5.26316	602	NM_005178	NM_005178	BCL3	-4.19948	-2.39593	DD
chr5	149109803	149110051	1_NT1_cutoff_0.02_peak_21170	12.9	69	1	0.19	5.26316	133522	NM_133263	NM_001172698	PPARGC1B	-4.38507	-2.39593	DD
chr9	116638538	116638781	1_NT1_cutoff_0.02_peak_25928	6	31	1	0.19	5.26316	114991	NM_133374	NM_001318041	ZNF618	-7.37504	-2.39593	DD
chr8	75233633	75234142	1_NT1_cutoff_0.02_peak_24661	14.7	79	1	0.19	5.26316	56704	NM_020647	NM_001317830	JPH1	-7.43463	-2.39593	DD
chr6	142622094	142622258	1_NT1_cutoff_0.02_peak_22522	2.6	13	1	0.2	5	57211	NM_020455	NM_001032395	ADGRG6	1.70733	-2.32193	UD
chr15	73344358	73344558	1_NT1_cutoff_0.02_peak_8910	7.8	38	1	0.2	5	4756	NM_002499	NM_001172623	NEO1	1.22135	-2.32193	UD
chr8	17354507	17354780	1_NT1_cutoff_0.02_peak_24359	6.9	34	1	0.2	5	6542	NM_003046	NM_001008539	SLC7A2	1.02164	-2.32193	ND
chr14	61788383	61788630	1_NT1_cutoff_0.02_peak_8031	9.5	47	1	0.2	5	5583	NM_006255	NM_006255	PRKCH	0.964376	-2.32193	ND
chr10	105845357	105845682	1_NT1_cutoff_0.02_peak_3916	6	30	1	0.2	5	1308	NM_000494	NM_000494	COL17A1	0.865629	-2.32193	ND
chr6	139013626	139013774	1_NT1_cutoff_0.02_peak_22516	4.3	22	1	0.2	5	441172	NR_033896	NR_033896	FLJ46906	0.838845	-2.32193	ND
chr1	955380	956921	1_NT1_cutoff_0.02_peak_18	41.4	204	1	0.2	5	375790	NM_198576	NM_198576	AGRN	0.67496	-2.32193	ND
chr7	21467706	21467878	1_NT1_cutoff_0.02_peak_23141	5.2	26	1	0.2	5	6671	NM_003112	NM_003112	SP4	0.626632	-2.32193	ND
chr22	24109898	24110302	1_NT1_cutoff_0.02_peak_17458	9.5	47	1	0.2	5	400916	NM_213720	NR_125756	CHCHD10	0.516674	-2.32193	ND
chr22	43547432	43548049	1_NT1_cutoff_0.02_peak_17932	20.7	106	1	0.2	5	706	NM_000714	NM_001256531	TSPO	0.366718	-2.32193	ND
chr16	810561	811333	1_NT1_cutoff_0.02_peak_9310	19.9	100	1	0.2	5	10232	NM_005823	NM_013404	MSLN	0.272132	-2.32193	ND
chr19	19174142	19175028	1_NT1_cutoff_0.02_peak_13598	33.7	168	1	0.2	5	284439	NM_178526	NM_001321544	SLC25A42	0.116324	-2.32193	ND
chr6	167369889	167370250	1_NT1_cutoff_0.02_peak_22656	7.8	39	1	0.2	5	8635	NM_003730	NM_003730	RNASET2	0.0788554	-2.32193	ND
chr6	146056109	146056636	3_NTT1_cutoff_0.02_peak_16829	82	402	1	0.2	5	7957	NM_005670	NR_153397	EPM2A	0.0773057	-2.32193	ND
chr12	105477329	105478471	1_NT1_cutoff_0.02_peak_6787	47.5	232	1	0.2	5	160428	NM_001034173	NR_027752	ALDH1L2	-0.00138255	-2.32193	ND
chr14	24424046	24424428	1_NT1_cutoff_0.02_peak_7782	8.6	44	1	0.2	5	55449	NM_018583	NR_023922	DHRS4-AS1	-0.0726845	-2.32193	ND
chr12	56325434	56327498	1_NT1_cutoff_0.02_peak_6240	63.9	314	1	0.2	5	1606	NM_001345	NM_001351039	DGKA	-0.0790151	-2.32193	ND
chr19	48828599	48828982	1_NT1_cutoff_0.02_peak_14213	9.5	48	1	0.2	5	2014	NM_001425	NM_001425	EMP3	-0.0816792	-2.32193	ND
chr4	78979586	78980738	1_NT1_cutoff_0.02_peak_19895	16.4	83	1	0.2	5	80144	NM_020875	NM_001166133	FRAS1	-0.142199	-2.32193	ND
chr17	36859245	36862063	1_NT1_cutoff_0.02_peak_11157	97.5	493	1	0.2	5	4302	NM_005937	NM_005937	MLLT6	-0.146189	-2.32193	ND
chr18	33877199	33877826	1_NT1_cutoff_0.02_peak_12487	20.7	105	1	0.2	5	80206	NM_025135	NM_001281739	FHOD3	-0.379589	-2.32193	ND
chr15	34658574	34659979	1_NT1_cutoff_0.02_peak_8512	40.6	203	1	0.2	5	254531	NM_153613	NM_153613	LPCAT4	-0.380574	-2.32193	ND
chr16	84534772	84539114	1_NT1_cutoff_0.02_peak_10271	136.4	667	1	0.2	5	57707	NM_020947	NM_020947	TLDC1	-0.404713	-2.32193	ND
chr11	68608181	68608716	1_NT1_cutoff_0.02_peak_5082	9.5	48	1	0.2	5	1374	NM_001876	NM_001031847	CPT1A	-0.413098	-2.32193	ND
chr1	19970413	19970979	1_NT1_cutoff_0.02_peak_376	17.3	87	1	0.2	5	4681	NM_005380	NM_005380	NBL1	-0.587639	-2.32193	ND
chr9	33523449	33523920	1_NT1_cutoff_0.02_peak_25444	24.2	122	1	0.2	5	441459	NM_001013728	NM_001353432	ANKRD18B	-0.610274	-2.32193	ND
chr19	3359331	3360675	1_NT1_cutoff_0.02_peak_12948	40.6	206	1	0.2	5	4782	NM_005597	NM_205843	NFIC	-0.662514	-2.32193	ND
chr13	91999814	92000327	3_NTT1_cutoff_0.02_peak_5495	62.1	313	1	0.2	5	407975	NR_027349	NR_027350	MIR17HG	-0.670936	-2.32193	ND
chr19	4639041	4639258	1_NT1_cutoff_0.02_peak_13004	7.8	38	1	0.2	5	126282	NM_152362	NM_152362	TNFAIP8L1	-0.738318	-2.32193	ND
chr1	43833386	43833992	3_NTT1_cutoff_0.02_peak_682	78.5	394	1	0.2	5	64834	NM_022821	NM_001256401	ELOVL1	-0.74452	-2.32193	ND
chr11	64072903	64075025	1_NT1_cutoff_0.02_peak_4823	78.5	389	1	0.2	5	2101	NM_004451	NM_001282450	ESRRA	-0.910601	-2.32193	ND
chr19	55886866	55889486	1_NT1_cutoff_0.02_peak_14443	63.9	318	1	0.2	5	147744	NM_139172	NM_139172	TMEM190	-0.921852	-2.32193	ND
chr11	123065256	123066278	1_NT1_cutoff_0.02_peak_5488	41.4	207	1	0.2	5	79827	NM_024769	NM_024769	CLMP	-0.938769	-2.32193	ND
chr1	92495320	92496018	1_NT1_cutoff_0.02_peak_1332	19.9	99	1	0.2	5	253152	NM_173567	NM_173567	EPHX4	-0.992029	-2.32193	ND
chr2	28613028	28618832	1_NT1_cutoff_0.02_peak_14822	181.2	921	1	0.2	5	2355	NM_005253	NM_005253	FOSL2	-1.13425	-2.32193	ND
chr13	76055963	76056535	1_NT1_cutoff_0.02_peak_7417	11.2	57	1	0.2	5	9882	NM_014832	NM_014832	TBC1D4	-1.27347	-2.32193	DD
chr20	9048439	9050201	1_NT1_cutoff_0.02_peak_16364	82	420	1	0.2	5	5332	NM_000933	NM_001172646	PLCB4	-1.32004	-2.32193	DD
chr3	4345294	4345661	3_NTT1_cutoff_0.02_peak_13441	20.7	106	1	0.2	5	6419	NM_006515	NM_001320677	SETMAR	-1.42321	-2.32193	DD
chr12	54427148	54427332	1_NT1_cutoff_0.02_peak_6201	5.2	26	1	0.2	5	3222	NM_018953	NM_018953	HOXC5	-1.70526	-2.32193	DD
chrY	21153153	21153917	1_NT1_cutoff_0.02_peak_27008	6.9	35	1	0.2	5	100133941	NM_013230	NM_001291739	CD24	-1.81413	-2.32193	DD
chr2	175869930	175870167	1_NT1_cutoff_0.02_peak_15691	6.9	35	1	0.2	5	1123	NM_001822	NR_038133	CHN1	-1.91913	-2.32193	DD
chr19	1864144	1865179	1_NT1_cutoff_0.02_peak_12836	73.4	364	1	0.2	5	83855	NM_031918	NM_031918	KLF16	-2	-2.32193	DD
chr16	85783019	85785170	1_NT1_cutoff_0.02_peak_10298	45.7	234	1	0.2	5	404550	NM_206967	NM_206967	C16orf74	-2.14551	-2.32193	DD
chr1	154975140	154976799	1_NT1_cutoff_0.02_peak_1895	57.8	291	1	0.2	5	51043	NM_001252406	NM_001256455	ZBTB7B	-2.32888	-2.32193	DD
chr9	136856480	136856660	1_NT1_cutoff_0.02_peak_26222	3.5	17	1	0.2	5	7410	NM_003371	NM_001134398	VAV2	-2.40623	-2.32193	DD
chr4	75719075	75719939	1_NT1_cutoff_0.02_peak_19866	26.8	131	1	0.2	5	685	NM_001729	NM_001729	BTC	-6.35755	-2.32193	DD
chr7	105161772	105162913	1_NT1_cutoff_0.02_peak_23872	55.2	279	1	0.2	5	54517	NM_019042	NM_001318164	PUS7	-9.97585	-2.32193	DD
chr2	56150135	56151060	1_NT1_cutoff_0.02_peak_15017	29.3	138	1	0.21	4.7619	2202	NM_004105	NM_001039348	EFEMP1	0.769454	-2.25154	ND
chr19	11373035	11373273	1_NT1_cutoff_0.02_peak_13270	7.8	37	1	0.21	4.7619	57572	NM_020812	NM_020812	DOCK6	0.503723	-2.25154	ND
chr15	77197439	77197971	1_NT1_cutoff_0.02_peak_8977	12.1	57	1	0.21	4.7619	49855	NM_020843	NM_001353011	SCAPER	0.410933	-2.25154	ND
chr21	42539517	42540984	1_NT1_cutoff_0.02_peak_17208	30.2	143	1	0.21	4.7619	25825	NM_012105	NM_012105	BACE2	0.393778	-2.25154	ND
chr20	304663	305519	1_NT1_cutoff_0.02_peak_16236	25	120	1	0.21	4.7619	100507459	NR_109990	NR_109990	NRSN2-AS1	0.277147	-2.25154	ND
chr7	111201350	111202679	1_NT1_cutoff_0.02_peak_23921	51.8	248	1	0.21	4.7619	83943	NM_032549	NM_001350960	IMMP2L	0.275942	-2.25154	ND
chr19	35645427	35646184	1_NT1_cutoff_0.02_peak_13714	23.3	110	1	0.21	4.7619	53827	NM_014164	NM_001164605	FXYD5	0.211711	-2.25154	ND
chr9	132250981	132251814	1_NT1_cutoff_0.02_peak_26116	31.1	145	1	0.21	4.7619	100506190	NR_038955	NR_038955	LINC00963	0.129119	-2.25154	ND
chr3	183354407	183355000	1_NT1_cutoff_0.02_peak_19266	15.5	75	1	0.21	4.7619	54800	NM_017644	NM_001349413	KLHL24	0.0892673	-2.25154	ND
chr3	99356300	99357866	1_NT1_cutoff_0.02_peak_18697	66.5	310	1	0.21	4.7619	1295	NM_001850	NM_020351	COL8A1	0.0697307	-2.25154	ND
chr9	100954710	100955384	1_NT1_cutoff_0.02_peak_25815	23.3	109	1	0.21	4.7619	7464	NM_003389	NM_052820	CORO2A	-0.272304	-2.25154	ND
chr2	163099110	163100135	1_NT1_cutoff_0.02_peak_15599	15.5	73	1	0.21	4.7619	2191	NM_004460	NM_001291807	FAP	-0.326593	-2.25154	ND
chr16	29817671	29819796	1_NT1_cutoff_0.02_peak_9768	88	428	1	0.21	4.7619	4150	NM_002383	NM_002383	MAZ	-0.340904	-2.25154	ND
chr19	41903071	41903369	1_NT1_cutoff_0.02_peak_13941	12.9	63	1	0.21	4.7619	56915	NM_020158	NM_020158	EXOSC5	-0.424713	-2.25154	ND
chr4	160149377	160149525	1_NT1_cutoff_0.02_peak_20213	5.2	25	1	0.21	4.7619	9693	NM_014247	NM_001351725	RAPGEF2	-0.484162	-2.25154	ND
chr16	776765	780064	1_NT1_cutoff_0.02_peak_9307	170.9	805	1	0.21	4.7619	84264	NM_032304	NM_032304	HAGHL	-0.54716	-2.25154	ND
chr4	154386734	154387693	1_NT1_cutoff_0.02_peak_20192	50.1	237	1	0.21	4.7619	23240	NM_015196	NM_015196	TMEM131L	-0.572184	-2.25154	ND
chr11	120107299	120107759	1_NT1_cutoff_0.02_peak_5456	9.5	45	1	0.21	4.7619	25833	NM_014352	NM_001244682	POU2F3	-0.584963	-2.25154	ND
chr12	106641539	106642181	1_NT1_cutoff_0.02_peak_6795	21.6	105	1	0.21	4.7619	10970	NM_006825	NM_006825	CKAP4	-0.591423	-2.25154	ND
chr5	145214702	145215255	1_NT1_cutoff_0.02_peak_21107	21.6	103	1	0.21	4.7619	153768	NM_138492	NM_182960	PRELID2	-0.604415	-2.25154	ND
chr10	91087685	91088156	1_NT1_cutoff_0.02_peak_3672	8.6	41	1	0.21	4.7619	3437	NM_001549	NM_001289758	IFIT3	-0.606941	-2.25154	ND
chr14	102700702	102700886	1_NT1_cutoff_0.02_peak_8334	9.5	45	1	0.21	4.7619	5891	NM_014226	NM_001353832	MOK	-0.627836	-2.25154	ND
chr17	36885811	36886853	1_NT1_cutoff_0.02_peak_11162	38	177	1	0.21	4.7619	284106	NM_001136498	NM_001136498	CISD3	-0.636511	-2.25154	ND
chr1	44441708	44445981	1_NT1_cutoff_0.02_peak_976	157.1	737	1	0.21	4.7619	8704	NM_003780	NM_003780	B4GALT2	-0.752091	-2.25154	ND
chr12	66275350	66275822	1_NT1_cutoff_0.02_peak_6518	6.9	33	1	0.21	4.7619	100129940	NM_001292023	NR_120478	LOC100129940	-0.756234	-2.25154	ND
chr10	123357799	123358124	1_NT1_cutoff_0.02_peak_4037	8.6	42	1	0.21	4.7619	2263	NM_000141	NM_001144917	FGFR2	-0.766467	-2.25154	ND
chr14	50863034	50864300	1_NT1_cutoff_0.02_peak_7930	33.7	159	1	0.21	4.7619	8814	NM_004196	NM_001282236	CDKL1	-0.81681	-2.25154	ND
chr20	3748184	3748529	1_NT1_cutoff_0.02_peak_16312	19	89	1	0.21	4.7619	54976	NM_017874	NM_001258429	C20orf27	-0.908984	-2.25154	ND
chr8	11626899	11627521	1_NT1_cutoff_0.02_peak_24309	18.1	87	1	0.21	4.7619	252969	NM_145043	NR_146181	NEIL2	-1.13516	-2.25154	ND
chr1	43918920	43919914	3_NTT1_cutoff_0.02_peak_686	97.5	469	1	0.21	4.7619	81888	NM_031207	NM_031207	HYI	-1.25204	-2.25154	DD
chr4	171011151	171011516	1_NT1_cutoff_0.02_peak_20256	13.8	66	1	0.21	4.7619	51166	NM_016228	NM_182662	AADAT	-1.31316	-2.25154	DD
chr1	207205905	207206303	3_NTT1_cutoff_0.02_peak_2096	59.6	278	1	0.21	4.7619	79098	NM_023938	NM_001083924	C1orf116	-1.39165	-2.25154	DD
chr5	175963399	175964514	1_NT1_cutoff_0.02_peak_21378	50.1	234	1	0.21	4.7619	22838	NM_014901	NM_014901	RNF44	-1.47313	-2.25154	DD
chr11	71498449	71498668	3_NTT1_cutoff_0.02_peak_3861	25	121	1	0.21	4.7619	55199	NM_018172	NM_018172	FAM86C1	-1.52395	-2.25154	DD
chr1	47903116	47903543	1_NT1_cutoff_0.02_peak_1078	14.7	70	1	0.21	4.7619	102724077	NR_126355	NR_126355	LINC01389	-1.55254	-2.25154	DD
chr2	110744157	110745856	1_NT1_cutoff_0.02_peak_15368	71.6	337	1	0.21	4.7619	440894	NR_046110	NR_046110	LINC01123	-1.72213	-2.25154	DD
chr2	111140997	111142582	1_NT1_cutoff_0.02_peak_15385	66.5	320	1	0.21	4.7619	440894	NR_046110	NR_046112	LINC01123	-1.72213	-2.25154	DD
chr16	31483188	31483410	1_NT1_cutoff_0.02_peak_9896	6.9	33	1	0.21	4.7619	7041	NM_015927	NM_001042454	TGFB1I1	-1.76693	-2.25154	DD
chr7	150783119	150783746	1_NT1_cutoff_0.02_peak_24218	21.6	104	1	0.21	4.7619	116988	NM_031946	NM_031946	AGAP3	-1.89706	-2.25154	DD
chr15	83951403	83956072	1_NT1_cutoff_0.02_peak_9037	152.8	725	1	0.21	4.7619	646	NM_001717	NM_001717	BNC1	-1.90038	-2.25154	DD
chr19	6740147	6740835	1_NT1_cutoff_0.02_peak_13077	35.4	168	1	0.21	4.7619	9322	NM_004240	NM_004240	TRIP10	-1.98261	-2.25154	DD
chr11	47206976	47207566	1_NT1_cutoff_0.02_peak_4573	11.2	54	1	0.21	4.7619	29763	NM_016223	NM_001184975	PACSIN3	-2.01309	-2.25154	DD
chr15	75493959	75494454	1_NT1_cutoff_0.02_peak_8949	37.1	176	1	0.21	4.7619	56905	NM_015492	NM_015492	C15orf39	-2.01602	-2.25154	DD
chr12	51663458	51665295	1_NT1_cutoff_0.02_peak_6039	58.7	273	1	0.21	4.7619	57228	NM_001031628	NM_001031628	SMAGP	-2.08198	-2.25154	DD
chr11	94501406	94501726	1_NT1_cutoff_0.02_peak_5273	12.9	62	1	0.21	4.7619	154810	NM_130847	NM_001301007	AMOTL1	-2.13719	-2.25154	DD
chr10	31320301	31321683	1_NT1_cutoff_0.02_peak_3236	62.1	301	1	0.21	4.7619	220929	NM_182755	NM_182755	ZNF438	-2.24793	-2.25154	DD
chr14	73393124	73394026	1_NT1_cutoff_0.02_peak_8136	35.4	165	1	0.21	4.7619	26094	NM_015604	NM_001352448	DCAF4	-2.42626	-2.25154	DD
chr3	5019308	5022838	1_NT1_cutoff_0.02_peak_18078	165.7	798	1	0.21	4.7619	8553	NM_003670	NM_003670	BHLHE40	-2.47856	-2.25154	DD
chr17	1627728	1628491	1_NT1_cutoff_0.02_peak_10463	26.8	130	1	0.21	4.7619	124997	NM_152348	NM_001163809	WDR81	-2.695	-2.25154	DD
chr6	41604516	41605443	1_NT1_cutoff_0.02_peak_22004	38	182	1	0.21	4.7619	4188	NM_005586	NM_001300804	MDFI	-2.96857	-2.25154	DD
chr11	66623553	66625141	1_NT1_cutoff_0.02_peak_5003	47.5	221	1	0.21	4.7619	78999	NM_024036	NM_024036	LRFN4	-3.22728	-2.25154	DD
chr14	69262443	69262953	3_NTT1_cutoff_0.02_peak_6042	58.7	279	1	0.21	4.7619	677	NM_004926	NM_001244701	ZFP36L1	-3.74597	-2.25154	DD
chr18	55712401	55712819	1_NT1_cutoff_0.02_peak_12563	9.5	44	1	0.22	4.54545	23327	NM_015277	NM_001243960	NEDD4L	2.26527	-2.18442	UD
chr16	29822112	29823447	1_NT1_cutoff_0.02_peak_9772	40.6	187	1	0.22	4.54545	112476	NM_145239	NM_145239	PRRT2	1.65711	-2.18442	UD
chr5	148442418	148442646	1_NT1_cutoff_0.02_peak_21140	6.9	32	1	0.22	4.54545	79628	NM_024577	NM_024577	SH3TC2	1.32931	-2.18442	UD
chr9	114936998	114937744	1_NT1_cutoff_0.02_peak_25905	25	112	1	0.22	4.54545	64420	NM_022486	NM_001282640	SUSD1	1.08573	-2.18442	ND
chr19	14544160	14544603	1_NT1_cutoff_0.02_peak_13426	18.1	81	1	0.22	4.54545	5585	NM_002741	NM_002741	PKN1	0.761592	-2.18442	ND
chr19	36036713	36036910	3_NTT1_cutoff_0.02_peak_10353	25.9	119	1	0.22	4.54545	100506469	NR_038396	NR_038396	TMEM147-AS1	0.694546	-2.18442	ND
chr14	100437494	100438458	1_NT1_cutoff_0.02_peak_8306	31.1	140	1	0.22	4.54545	51466	NM_016337	NM_001330221	EVL	0.643367	-2.18442	ND
chr2	220435172	220436418	1_NT1_cutoff_0.02_peak_16054	48.3	215	1	0.22	4.54545	23363	NM_015311	NM_001173408	OBSL1	0.602789	-2.18442	ND
chr17	78010118	78010297	1_NT1_cutoff_0.02_peak_12081	6.9	31	1	0.22	4.54545	55036	NM_017950	NM_017950	CCDC40	0.584963	-2.18442	ND
chr2	143634867	143635412	1_NT1_cutoff_0.02_peak_15527	17.3	77	1	0.22	4.54545	8942	NM_003937	NM_001032998	KYNU	0.386054	-2.18442	ND
chr4	185655062	185655365	1_NT1_cutoff_0.02_peak_20293	10.4	47	1	0.22	4.54545	79682	NM_024629	NR_104593	CENPU	0.369646	-2.18442	ND
chr11	128391248	128391557	1_NT1_cutoff_0.02_peak_5537	4.3	20	1	0.22	4.54545	2113	NM_005238	NM_005238	ETS1	0.358368	-2.18442	ND
chr11	64781501	64782619	1_NT1_cutoff_0.02_peak_4861	57	264	1	0.22	4.54545	402	NM_001667	NM_001199745	ARL2	0.354927	-2.18442	ND
chr6_cox_hap2	3272883	3273068	1_NT1_cutoff_0.02_peak_22731	6.9	32	1	0.22	4.54545	7407	NM_006295	NM_006295	VARS	0.343701	-2.18442	ND
chr1	65731354	65731706	1_NT1_cutoff_0.02_peak_1181	8.6	40	1	0.22	4.54545	9829	NM_014787	NM_014787	DNAJC6	0.224183	-2.18442	ND
chr18	74843170	74844412	1_NT1_cutoff_0.02_peak_12636	28.5	132	1	0.22	4.54545	4155	NM_002385	NM_001025100	MBP	0.135101	-2.18442	ND
chr13	37494260	37494588	1_NT1_cutoff_0.02_peak_7261	9.5	43	1	0.22	4.54545	4093	NM_005905	NM_005905	SMAD9	0.0473057	-2.18442	ND
chr7	8300822	8302483	1_NT1_cutoff_0.02_peak_23118	55.2	248	1	0.22	4.54545	3382	NM_004968	NM_001350825	ICA1	0.0400774	-2.18442	ND
chr17	49243569	49244010	3_NTT1_cutoff_0.02_peak_8804	57.8	262	1	0.22	4.54545	4831	NM_002512	NM_001018139	NME2	0.0345612	-2.18442	ND
chr20	54933953	54934225	1_NT1_cutoff_0.02_peak_16879	12.1	54	1	0.22	4.54545	116151	NM_080821	NM_080821	FAM210B	0.029842	-2.18442	ND
chr15	63892577	63893442	1_NT1_cutoff_0.02_peak_8799	51.8	237	1	0.22	4.54545	100130855	NR_034080	NR_034080	USP3-AS1	-0.0280144	-2.18442	ND
chr10	97050587	97051092	1_NT1_cutoff_0.02_peak_3704	15.5	70	1	0.22	4.54545	9124	NM_020992	NM_020992	PDLIM1	-0.0316227	-2.18442	ND
chr19	18699461	18700798	1_NT1_cutoff_0.02_peak_13573	69	310	1	0.22	4.54545	55049	NM_017967	NM_001100419	REX1BD	-0.0350579	-2.18442	ND
chr18	33767054	33767263	3_NTT1_cutoff_0.02_peak_9468	23.3	105	1	0.22	4.54545	55034	NM_017947	NM_017947	MOCOS	-0.0413121	-2.18442	ND
chrX	49028143	49030014	1_NT1_cutoff_0.02_peak_26590	67.3	308	1	0.22	4.54545	5355	NM_002668	NM_002668	PLP2	-0.068573	-2.18442	ND
chr12	51419865	51420494	1_NT1_cutoff_0.02_peak_6030	31.9	146	1	0.22	4.54545	4891	NM_000617	NR_033421	SLC11A2	-0.124347	-2.18442	ND
chr7	55639848	55640228	1_NT1_cutoff_0.02_peak_23419	9.5	44	1	0.22	4.54545	81552	NM_030796	NM_001321247	VOPP1	-0.30227	-2.18442	ND
chr21	43430565	43430822	3_NTT1_cutoff_0.02_peak_12931	21.6	99	1	0.22	4.54545	49854	NM_020727	NM_001098402	ZBTB21	-0.736966	-2.18442	ND
chr1	151964115	151966705	1_NT1_cutoff_0.02_peak_1771	180.4	832	1	0.22	4.54545	6281	NM_002966	NM_002966	S100A10	-0.740618	-2.18442	ND
chr8	134583800	134585214	1_NT1_cutoff_0.02_peak_25041	64.7	300	1	0.22	4.54545	6482	NM_003033	NM_003033	ST3GAL1	-0.830873	-2.18442	ND
chr18	29264176	29265510	1_NT1_cutoff_0.02_peak_12466	38.8	177	1	0.22	4.54545	9331	NM_004775	NM_004775	B4GALT6	-0.922832	-2.18442	ND
chr16	57836568	57836832	1_NT1_cutoff_0.02_peak_9986	6.9	31	1	0.22	4.54545	3801	NM_005550	NM_001318710	KIFC3	-1.05209	-2.18442	ND
chr4	53617138	53617989	1_NT1_cutoff_0.02_peak_19769	25	115	1	0.22	4.54545	100288413	NM_024534	NM_024534	ERVMER34-1	-1.0766	-2.18442	ND
chr9	127020163	127020634	1_NT1_cutoff_0.02_peak_25968	15.5	71	1	0.22	4.54545	10783	NM_014397	NM_001166168	NEK6	-1.16552	-2.18442	ND
chr7	128045719	128046146	1_NT1_cutoff_0.02_peak_24000	11.2	51	1	0.22	4.54545	3614	NM_000883	NM_001142574	IMPDH1	-1.18059	-2.18442	ND
chr7	151574295	151574773	1_NT1_cutoff_0.02_peak_24234	11.2	50	1	0.22	4.54545	51422	NM_016203	NM_016203	PRKAG2	-1.2001	-2.18442	DD
chr9	504326	505546	1_NT1_cutoff_0.02_peak_25302	42.3	192	1	0.22	4.54545	23189	NM_015158	NM_001354334	KANK1	-1.36109	-2.18442	DD
chr18	24127561	24127709	1_NT1_cutoff_0.02_peak_12451	6	27	1	0.22	4.54545	284252	NM_198991	NM_001142730	KCTD1	-1.39824	-2.18442	DD
chr2	73339874	73340851	1_NT1_cutoff_0.02_peak_15142	32.8	146	1	0.22	4.54545	26056	NM_015470	NM_015470	RAB11FIP5	-1.42106	-2.18442	DD
chr6	125283033	125283406	1_NT1_cutoff_0.02_peak_22452	12.1	55	1	0.22	4.54545	154214	NM_152553	NR_136734	RNF217	-1.50861	-2.18442	DD
chr17	33468962	33469446	1_NT1_cutoff_0.02_peak_11074	19	87	1	0.22	4.54545	54475	NM_018096	NM_001014445	NLE1	-1.55652	-2.18442	DD
chr13	95953533	95954067	1_NT1_cutoff_0.02_peak_7458	14.7	66	1	0.22	4.54545	10257	NM_005845	NM_001301829	ABCC4	-1.56253	-2.18442	DD
chr15	52029420	52030313	1_NT1_cutoff_0.02_peak_8707	25	116	1	0.22	4.54545	256586	NM_153374	NM_153374	LYSMD2	-1.70512	-2.18442	DD
chr1	231175774	231176198	1_NT1_cutoff_0.02_peak_2847	24.2	109	1	0.22	4.54545	375061	NM_198552	NM_198552	FAM89A	-1.82729	-2.18442	DD
chr18	3451426	3452074	3_NTT1_cutoff_0.02_peak_9359	49.2	219	1	0.22	4.54545	7050	NM_003244	NM_173210	TGIF1	-1.85321	-2.18442	DD
chr1	208417480	208417785	1_NT1_cutoff_0.02_peak_2603	13.8	63	1	0.22	4.54545	5362	NM_025179	NM_025179	PLXNA2	-1.8748	-2.18442	DD
chr11	45825781	45826180	1_NT1_cutoff_0.02_peak_4546	11.2	52	1	0.22	4.54545	55343	NM_018389	NM_001145265	SLC35C1	-2.00305	-2.18442	DD
chr1	2518274	2518482	1_NT1_cutoff_0.02_peak_136	5.2	24	1	0.22	4.54545	127281	NM_152371	NM_001195741	FAM213B	-2.02281	-2.18442	DD
chr19	1568322	1568683	1_NT1_cutoff_0.02_peak_12808	15.5	72	1	0.22	4.54545	399664	NM_203304	NM_203304	MEX3D	-2.25058	-2.18442	DD
chr9	136857236	136858611	1_NT1_cutoff_0.02_peak_26223	36.2	166	1	0.22	4.54545	7410	NM_003371	NM_003371	VAV2	-2.40623	-2.18442	DD
chr17	67410635	67410815	1_NT1_cutoff_0.02_peak_11851	3.5	16	1	0.22	4.54545	5608	NM_002758	NM_002758	MAP2K6	-2.80735	-2.18442	DD
chr18	43913950	43914130	1_NT1_cutoff_0.02_peak_12506	8.6	40	1	0.22	4.54545	494470	NM_152470	NM_152470	RNF165	-2.922	-2.18442	DD
chr9	99179500	99180295	3_NTT1_cutoff_0.02_peak_18974	33.7	154	1	0.22	4.54545	195828	NM_153695	NM_153695	ZNF367	-3.07529	-2.18442	DD
chr4	38664789	38666635	1_NT1_cutoff_0.02_peak_19706	50.9	233	1	0.22	4.54545	51274	NM_016531	NM_016531	KLF3	-3.08128	-2.18442	DD
chr12	31743673	31744141	1_NT1_cutoff_0.02_peak_5905	17.3	79	1	0.22	4.54545	160518	NM_144973	NM_144973	DENND5B	-4.08746	-2.18442	DD
chr1	59762007	59762370	1_NT1_cutoff_0.02_peak_1153	11.2	49	1	0.23	4.34783	55277	NM_018291	NM_001350797	FGGY	1.47207	-2.12029	UD
chr6	26055556	26056965	3_NTT1_cutoff_0.02_peak_16236	223.5	967	1	0.23	4.34783	3006	NM_005319	NM_005319	HIST1H1C	0.944069	-2.12029	ND
chr7	76026804	76027060	1_NT1_cutoff_0.02_peak_23611	6.9	30	1	0.23	4.34783	7784	NM_007155	NM_007155	ZP3	0.789664	-2.12029	ND
chr11	314649	315006	1_NT1_cutoff_0.02_peak_4131	17.3	74	1	0.23	4.34783	8519	NM_003641	NM_003641	IFITM1	0.68871	-2.12029	ND
chr1	184355781	184356324	1_NT1_cutoff_0.02_peak_2406	24.2	105	1	0.23	4.34783	81563	NM_030806	NM_030806	C1orf21	0.592624	-2.12029	ND
chr16	68678733	68680147	1_NT1_cutoff_0.02_peak_10100	48.3	211	1	0.23	4.34783	1001	NM_001793	NM_001793	CDH3	0.510013	-2.12029	ND
chr12	48512939	48513755	1_NT1_cutoff_0.02_peak_5977	20.7	91	1	0.23	4.34783	5213	NM_000289	NM_001354745	PFKM	0.5049	-2.12029	ND
chr9	140317782	140318032	1_NT1_cutoff_0.02_peak_26333	12.1	53	1	0.23	4.34783	10811	NM_006647	NM_006647	NOXA1	0.504695	-2.12029	ND
chr4	56212204	56212707	1_NT1_cutoff_0.02_peak_19776	20.7	91	1	0.23	4.34783	79644	NM_024592	NM_024592	SRD5A3	0.421933	-2.12029	ND
chr11	35160532	35161432	1_NT1_cutoff_0.02_peak_4520	41.4	178	1	0.23	4.34783	960	NM_000610	NM_001202556	CD44	0.396348	-2.12029	ND
chr6	56507095	56507788	1_NT1_cutoff_0.02_peak_22165	18.1	78	1	0.23	4.34783	667	NM_001723	NM_001723	DST	0.365775	-2.12029	ND
chr14	24458024	24458270	1_NT1_cutoff_0.02_peak_7783	6	26	1	0.23	4.34783	317749	NM_198083	NM_198083	DHRS4L2	0.362943	-2.12029	ND
chr8	18871099	18871288	1_NT1_cutoff_0.02_peak_24367	8.6	38	1	0.23	4.34783	23362	NM_015310	NM_015310	PSD3	0.301656	-2.12029	ND
chr16	67312770	67313403	1_NT1_cutoff_0.02_peak_10045	28.5	125	1	0.23	4.34783	25894	NM_015432	NM_001129728	PLEKHG4	0.275634	-2.12029	ND
chr9	14314820	14316073	3_NTT1_cutoff_0.02_peak_18687	316.8	1364	1	0.23	4.34783	4781	NM_005596	NM_001190737	NFIB	0.108441	-2.12029	ND
chr4	980701	981140	1_NT1_cutoff_0.02_peak_19529	18.1	80	1	0.23	4.34783	3425	NM_000203	NM_000203	IDUA	0.0365259	-2.12029	ND
chr3	38495379	38495544	1_NT1_cutoff_0.02_peak_18268	5.2	23	1	0.23	4.34783	93	NM_001106	NM_001106	ACVR2B	0.0317089	-2.12029	ND
chr21	45719847	45720073	3_NTT1_cutoff_0.02_peak_12959	22.4	99	1	0.23	4.34783	5211	NM_002626	NM_002626	PFKL	-0.00617564	-2.12029	ND
chr10	121301981	121303183	1_NT1_cutoff_0.02_peak_4022	76.8	332	1	0.23	4.34783	6001	NM_002925	NM_001005339	RGS10	-0.118928	-2.12029	ND
chr13	52733031	52734028	1_NT1_cutoff_0.02_peak_7374	37.1	159	1	0.23	4.34783	4752	NM_002498	NM_152720	NEK3	-0.303392	-2.12029	ND
chr3	24536313	24536664	1_NT1_cutoff_0.02_peak_18209	12.1	53	1	0.23	4.34783	7068	NM_000461	NM_001354709	THRB	-0.344446	-2.12029	ND
chr19	55995980	55996857	1_NT1_cutoff_0.02_peak_14459	32.8	144	1	0.23	4.34783	57106	NM_020378	NM_020378	NAT14	-0.393011	-2.12029	ND
chr12	106533132	106533305	1_NT1_cutoff_0.02_peak_6792	3.5	15	1	0.23	4.34783	9891	NM_014840	NM_014840	NUAK1	-0.50696	-2.12029	ND
chr16	56651268	56651593	1_NT1_cutoff_0.02_peak_9957	7.8	34	1	0.23	4.34783	4500	NR_001447	NR_001447	MT1L	-0.507287	-2.12029	ND
chr19	45909820	45910040	3_NTT1_cutoff_0.02_peak_10594	53.5	235	1	0.23	4.34783	10848	NM_006663	NM_001142502	PPP1R13L	-0.548099	-2.12029	ND
chr17	75315486	75316039	1_NT1_cutoff_0.02_peak_12040	15.5	69	1	0.23	4.34783	10801	NM_006640	NM_006640	2009-09-01	-0.579828	-2.12029	ND
chr5	131593232	131593983	1_NT1_cutoff_0.02_peak_20848	29.3	129	1	0.23	4.34783	8572	NM_003687	NM_001131027	PDLIM4	-0.661836	-2.12029	ND
chr18	28682197	28682382	1_NT1_cutoff_0.02_peak_12461	6.9	30	1	0.23	4.34783	1824	NM_004949	NM_024422	DSC2	-0.702032	-2.12029	ND
chr8	17658790	17659256	1_NT1_cutoff_0.02_peak_24362	12.1	52	1	0.23	4.34783	57509	NM_020749	NM_001001925	MTUS1	-0.705715	-2.12029	ND
chr7	101929833	101930025	1_NT1_cutoff_0.02_peak_23838	9.5	41	1	0.23	4.34783	10603	NM_020979	NM_001359228	SH2B2	-0.771731	-2.12029	ND
chr4	40631673	40631868	1_NT1_cutoff_0.02_peak_19722	6	26	1	0.23	4.34783	54502	NM_019027	NM_001098634	RBM47	-0.826198	-2.12029	ND
chr1	65614195	65614688	1_NT1_cutoff_0.02_peak_1179	12.9	56	1	0.23	4.34783	205	NM_013410	NM_001330616	AK4	-0.85319	-2.12029	ND
chr19	11450107	11450439	1_NT1_cutoff_0.02_peak_13271	12.1	52	1	0.23	4.34783	9545	NM_004283	NM_004283	RAB3D	-0.854654	-2.12029	ND
chr3	32148090	32148433	1_NT1_cutoff_0.02_peak_18234	9.5	42	1	0.23	4.34783	23171	NM_015141	NM_015141	GPD1L	-0.99146	-2.12029	ND
chr3	13009052	13009287	1_NT1_cutoff_0.02_peak_18159	6.9	30	1	0.23	4.34783	9922	NM_014869	NM_014869	IQSEC1	-1.10332	-2.12029	ND
chr22	30821527	30822239	1_NT1_cutoff_0.02_peak_17565	26.8	114	1	0.23	4.34783	51537	NM_016498	NM_001003704	MTFP1	-1.16883	-2.12029	ND
chr13	23949082	23949762	1_NT1_cutoff_0.02_peak_7181	24.2	106	1	0.23	4.34783	26278	NM_014363	NM_001278055	SACS	-1.2297	-2.12029	DD
chr9	706723	707414	1_NT1_cutoff_0.02_peak_25304	19.9	87	1	0.23	4.34783	23189	NM_015158	NR_148869	KANK1	-1.36109	-2.12029	DD
chr13	24734741	24735055	1_NT1_cutoff_0.02_peak_7184	12.1	52	1	0.23	4.34783	221178	NM_153023	NM_153023	SPATA13	-1.49683	-2.12029	DD
chr11	120081530	120081927	1_NT1_cutoff_0.02_peak_5455	11.2	49	1	0.23	4.34783	220323	NM_178507	NM_178507	OAF	-1.52943	-2.12029	DD
chr10	82213965	82214400	1_NT1_cutoff_0.02_peak_3647	14.7	63	1	0.23	4.34783	81619	NM_030927	NM_001351267	TSPAN14	-1.53862	-2.12029	DD
chr2	74668865	74669078	3_NTT1_cutoff_0.02_peak_11431	20.7	91	1	0.23	4.34783	6242	NM_033046	NM_001015055	RTKN	-1.62155	-2.12029	DD
chr8	29208027	29208640	3_NTT1_cutoff_0.02_peak_18089	137.2	598	1	0.23	4.34783	1846	NM_001394	NM_001394	DUSP4	-1.65488	-2.12029	DD
chr20	50808226	50808487	3_NTT1_cutoff_0.02_peak_12698	24.2	107	1	0.23	4.34783	55734	NM_018197	NM_199427	ZFP64	-1.65489	-2.12029	DD
chr16	67562602	67563510	1_NT1_cutoff_0.02_peak_10049	23.3	101	1	0.23	4.34783	79567	NM_024519	NM_001193522	RIPOR1	-1.77352	-2.12029	DD
chr21	43373812	43374181	1_NT1_cutoff_0.02_peak_17213	13.8	61	1	0.23	4.34783	25966	NM_015500	NM_015500	C2CD2	-1.91734	-2.12029	DD
chr1	44495777	44496514	1_NT1_cutoff_0.02_peak_980	24.2	105	1	0.23	4.34783	6536	NM_006934	NM_001328629	SLC6A9	-2.07039	-2.12029	DD
chr1	165796687	165797214	3_NTT1_cutoff_0.02_peak_1751	46.6	205	1	0.23	4.34783	7371	NM_012474	NM_012474	UCK2	-2.76457	-2.12029	DD
chr19	44258621	44260015	3_NTT1_cutoff_0.02_peak_10556	157.1	673	1	0.23	4.34783	56006	NM_019108	NM_019108	SMG9	-2.79475	-2.12029	DD
chr15	101419902	101420146	3_NTT1_cutoff_0.02_peak_7049	36.2	156	1	0.23	4.34783	220	NM_000693	NM_000693	ALDH1A3	-3.52492	-2.12029	DD
chr12	26278844	26279255	1_NT1_cutoff_0.02_peak_5870	9.5	39	1	0.24	4.16667	79365	NM_030762	NM_030762	BHLHE41	2.16993	-2.05889	UD
chr14	74003729	74004655	1_NT1_cutoff_0.02_peak_8144	38.8	160	1	0.24	4.16667	641371	NM_001037161	NM_001037161	ACOT1	1.91488	-2.05889	UD
chrX	118109939	118110622	1_NT1_cutoff_0.02_peak_26789	15.5	64	1	0.24	4.16667	79836	NM_024778	NM_001289109	LONRF3	1.7318	-2.05889	UD
chr17	55333424	55334055	1_NT1_cutoff_0.02_peak_11666	15.5	64	1	0.24	4.16667	124540	NM_138962	NM_138962	MSI2	1.09093	-2.05889	ND
chr9	108006862	108007133	1_NT1_cutoff_0.02_peak_25863	14.7	60	1	0.24	4.16667	23446	NM_022109	NM_080546	SLC44A1	0.884366	-2.05889	ND
chr9	88357063	88357257	1_NT1_cutoff_0.02_peak_25693	8.6	36	1	0.24	4.16667	23287	NM_015239	NM_015239	AGTPBP1	0.719739	-2.05889	ND
chr20	3780189	3780753	1_NT1_cutoff_0.02_peak_16324	9.5	40	1	0.24	4.16667	994	NM_004358	NM_001287524	CDC25B	0.527531	-2.05889	ND
chr3	196695460	196696051	1_NT1_cutoff_0.02_peak_19484	31.1	130	1	0.24	4.16667	80235	NM_025163	NM_025163	PIGZ	0.499688	-2.05889	ND
chr12	59990541	59990996	1_NT1_cutoff_0.02_peak_6411	18.1	75	1	0.24	4.16667	9194	NM_004731	NM_001270623	SLC16A7	0.479526	-2.05889	ND
chr17	1012137	1013008	1_NT1_cutoff_0.02_peak_10431	24.2	102	1	0.24	4.16667	29	NM_001092	NM_001092	ABR	0.368846	-2.05889	ND
chr11	64781067	64781408	1_NT1_cutoff_0.02_peak_4860	19.9	82	1	0.24	4.16667	402	NM_001667	NM_001667	ARL2	0.354927	-2.05889	ND
chr20	49347234	49347617	1_NT1_cutoff_0.02_peak_16859	15.5	66	1	0.24	4.16667	84612	NM_032521	NM_032521	PARD6B	0.18861	-2.05889	ND
chr8	25042535	25042979	1_NT1_cutoff_0.02_peak_24423	18.1	74	1	0.24	4.16667	80005	NM_024940	NM_001322810	DOCK5	0.0945593	-2.05889	ND
chr17	40428197	40428702	1_NT1_cutoff_0.02_peak_11312	36.2	148	1	0.24	4.16667	6777	NM_012448	NM_012448	STAT5B	0.0309096	-2.05889	ND
chr12	57505151	57505319	3_NTT1_cutoff_0.02_peak_4654	21.6	90	1	0.24	4.16667	6778	NM_003153	NM_001178078	STAT6	0.0184963	-2.05889	ND
chr11	10472173	10472360	1_NT1_cutoff_0.02_peak_4369	6.9	29	1	0.24	4.16667	272	NM_000480	NM_000480	AMPD3	0.017278	-2.05889	ND
chr20	55204898	55206043	1_NT1_cutoff_0.02_peak_16888	32.8	135	1	0.24	4.16667	7022	NM_003222	NM_003222	TFAP2C	0.0079052	-2.05889	ND
chr5	149865262	149866326	1_NT1_cutoff_0.02_peak_21182	49.2	209	1	0.24	4.16667	102546298	NR_105061	NR_105061	NDST1-AS1	0	-2.05889	ND
chr16	67204188	67204733	1_NT1_cutoff_0.02_peak_10017	18.1	75	1	0.24	4.16667	8996	NM_003946	NM_001276312	NOL3	-0.0132237	-2.05889	ND
chr4	115519354	115519820	1_NT1_cutoff_0.02_peak_20049	17.3	73	1	0.24	4.16667	7368	NM_003360	NM_001128174	UGT8	-0.0218705	-2.05889	ND
chr8	28243253	28243933	1_NT1_cutoff_0.02_peak_24445	17.3	72	1	0.24	4.16667	55893	NM_018660	NM_018660	ZNF395	-0.0375723	-2.05889	ND
chrX	69674963	69675174	1_NT1_cutoff_0.02_peak_26658	5.2	22	1	0.24	4.16667	1741	NM_020730	NM_001166278	DLG3	-0.178337	-2.05889	ND
chr22	24407397	24407586	1_NT1_cutoff_0.02_peak_17468	9.5	40	1	0.24	4.16667	23523	NM_012295	NM_001201429	CABIN1	-0.279448	-2.05889	ND
chr12	8394764	8395299	1_NT1_cutoff_0.02_peak_5730	16.4	68	1	0.24	4.16667	653113	NR_024254	NR_024254	FAM86FP	-0.328623	-2.05889	ND
chr2	240322494	240322806	1_NT1_cutoff_0.02_peak_16185	11.2	46	1	0.24	4.16667	9759	NM_006037	NM_006037	HDAC4	-0.425926	-2.05889	ND
chrX	54209881	54210075	3_NTT1_cutoff_0.02_peak_19593	12.1	50	1	0.24	4.16667	54954	NM_017848	NM_001300788	FAM120C	-0.443989	-2.05889	ND
chr14	105155565	105156154	1_NT1_cutoff_0.02_peak_8396	19.9	84	1	0.24	4.16667	64423	NM_022489	NM_001031714	INF2	-0.477151	-2.05889	ND
chr1	156720053	156720331	3_NTT1_cutoff_0.02_peak_1679	72.5	306	1	0.24	4.16667	3068	NM_004494	NM_001319188	HDGF	-0.550007	-2.05889	ND
chr1	156720571	156722027	3_NTT1_cutoff_0.02_peak_1680	240.8	1010	1	0.24	4.16667	3068	NM_004494	NM_001319187	HDGF	-0.550007	-2.05889	ND
chr12	96588046	96588441	1_NT1_cutoff_0.02_peak_6716	16.4	69	1	0.24	4.16667	2004	NM_005230	NM_005230	ELK3	-0.624412	-2.05889	ND
chr17	79894919	79895532	1_NT1_cutoff_0.02_peak_12187	23.3	99	1	0.24	4.16667	5831	NM_006907	NM_001282279	PYCR1	-0.649407	-2.05889	ND
chr16	2523617	2525332	1_NT1_cutoff_0.02_peak_9418	77.7	329	1	0.24	4.16667	57465	NM_020705	NM_001199107	TBC1D24	-0.782643	-2.05889	ND
chr1	61548123	61548543	1_NT1_cutoff_0.02_peak_1159	9.5	39	1	0.24	4.16667	4774	NM_005595	NM_001134673	NFIA	-0.815415	-2.05889	ND
chr8	19674354	19674673	1_NT1_cutoff_0.02_peak_24369	12.1	51	1	0.24	4.16667	55174	NM_018142	NM_001353514	INTS10	-0.88281	-2.05889	ND
chr8	143782033	143782424	1_NT1_cutoff_0.02_peak_25068	13.8	58	1	0.24	4.16667	54742	NM_017527	NM_017527	LY6K	-0.900464	-2.05889	ND
chr8	145691442	145691752	1_NT1_cutoff_0.02_peak_25257	9.5	39	1	0.24	4.16667	90990	NM_145754	NM_145754	KIFC2	-0.938815	-2.05889	ND
chr1	227058158	227058893	1_NT1_cutoff_0.02_peak_2772	46.6	192	1	0.24	4.16667	5664	NM_000447	NM_000447	PSEN2	-1.0944	-2.05889	ND
chr12	30906330	30906681	1_NT1_cutoff_0.02_peak_5897	6.9	29	1	0.24	4.16667	65981	NM_023925	NM_023925	CAPRIN2	-1.12296	-2.05889	ND
chr2	10588787	10589044	1_NT1_cutoff_0.02_peak_14666	12.9	55	1	0.24	4.16667	4953	NM_002539	NM_002539	ODC1	-1.17261	-2.05889	ND
chr18	77793494	77793828	1_NT1_cutoff_0.02_peak_12652	14.7	60	1	0.24	4.16667	10907	NM_006701	NM_001305563	TXNL4A	-1.22341	-2.05889	DD
chr20	18124754	18124986	1_NT1_cutoff_0.02_peak_16419	4.3	18	1	0.24	4.16667	57325	NM_020536	NR_028402	KAT14	-1.25768	-2.05889	DD
chr19	17666172	17667405	1_NT1_cutoff_0.02_peak_13527	50.9	211	1	0.24	4.16667	79709	NM_024656	NM_024656	COLGALT1	-1.30001	-2.05889	DD
chr3	53080119	53080385	3_NTT1_cutoff_0.02_peak_13863	17.3	71	1	0.24	4.16667	51460	NM_016329	NM_016329	SFMBT1	-1.3112	-2.05889	DD
chr7	73497763	73498475	1_NT1_cutoff_0.02_peak_23524	20.7	88	1	0.24	4.16667	3984	NM_002314	NM_002314	LIMK1	-1.47177	-2.05889	DD
chr18	52495521	52495789	1_NT1_cutoff_0.02_peak_12550	10.4	44	1	0.24	4.16667	5874	NM_004163	NM_004163	RAB27B	-1.48981	-2.05889	DD
chr1	17764100	17764762	3_NTT1_cutoff_0.02_peak_197	38.8	165	1	0.24	4.16667	55920	NM_018715	NM_001136204	RCC2	-1.51869	-2.05889	DD
chr5	77944410	77944784	1_NT1_cutoff_0.02_peak_20683	7.8	33	1	0.24	4.16667	10184	NM_005779	NM_005779	LHFPL2	-1.59984	-2.05889	DD
chr17	55163267	55163563	1_NT1_cutoff_0.02_peak_11664	6	25	1	0.24	4.16667	8165	NM_003488	NM_001242902	AKAP1	-1.61344	-2.05889	DD
chr7	130790785	130791222	1_NT1_cutoff_0.02_peak_24089	15.5	65	1	0.24	4.16667	378805	NM_001085379	NR_024153	LINC-PINT	-1.69837	-2.05889	DD
chr16	73081292	73082671	1_NT1_cutoff_0.02_peak_10200	46.6	196	1	0.24	4.16667	463	NM_006885	NM_006885	ZFHX3	-1.73471	-2.05889	DD
chr7	19156968	19157176	1_NT1_cutoff_0.02_peak_23135	6.9	29	1	0.24	4.16667	7291	NM_000474	NR_149001	TWIST1	-1.93565	-2.05889	DD
chr9	112810857	112811325	1_NT1_cutoff_0.02_peak_25885	16.4	69	1	0.24	4.16667	11217	NM_001004065	NM_001198656	AKAP2	-1.97822	-2.05889	DD
chr7	766828	766998	3_NTT1_cutoff_0.02_peak_17055	34.5	144	1	0.24	4.16667	5575	NM_002735	NM_001164760	PRKAR1B	-2.04638	-2.05889	DD
chr5	76382489	76383283	1_NT1_cutoff_0.02_peak_20675	26.8	110	1	0.24	4.16667	84327	NM_032367	NM_032367	ZBED3	-2.18763	-2.05889	DD
chr6	52149257	52149699	3_NTT1_cutoff_0.02_peak_16567	21.6	91	1	0.24	4.16667	4172	NM_002388	NM_001270472	MCM3	-2.22803	-2.05889	DD
chr5	133859858	133860779	1_NT1_cutoff_0.02_peak_20912	51.8	218	1	0.24	4.16667	23338	NM_015288	NM_001308143	JADE2	-2.27711	-2.05889	DD
chr11	122293412	122293599	1_NT1_cutoff_0.02_peak_5480	5.2	22	1	0.24	4.16667	399959	NR_024430	NR_137179	MIR100HG	-2.5615	-2.05889	DD
chr15	96873432	96874413	1_NT1_cutoff_0.02_peak_9189	31.9	133	1	0.24	4.16667	7026	NM_021005	NM_021005	NR2F2	-2.88057	-2.05889	DD
chr22	30643528	30643706	1_NT1_cutoff_0.02_peak_17555	4.3	18	1	0.24	4.16667	3976	NM_002309	NM_001257135	LIF	-2.88514	-2.05889	DD
chr6	21594535	21596210	1_NT1_cutoff_0.02_peak_21710	44.9	190	1	0.24	4.16667	6659	NM_003107	NM_003107	SOX4	-2.96572	-2.05889	DD
chr7	100951465	100951776	1_NT1_cutoff_0.02_peak_23831	12.1	51	1	0.24	4.16667	101927746	NR_110115	NR_110115	LOC101927746	-3.38091	-2.05889	DD
chr10	90640356	90640682	3_NTT1_cutoff_0.02_peak_2917	45.7	190	1	0.24	4.16667	57559	NM_020799	NM_020799	STAMBPL1	-3.76888	-2.05889	DD
chr19	751515	751865	1_NT1_cutoff_0.02_peak_12685	10.4	44	1	0.24	4.16667	126353	NM_173481	NM_173481	MISP	-4.2884	-2.05889	DD
chr1	28831973	28838818	3_NTT1_cutoff_0.02_peak_414	1895.4	7874	1	0.24	4.16667	26768	NR_004404	NR_004404	SNORA73B	-9.95274	-2.05889	DD
chr3	113666629	113666998	1_NT1_cutoff_0.02_peak_18777	12.1	48	1	0.25	4	254887	NM_173570	NM_173570	ZDHHC23	5.70044	-2	UD
chr2	241499623	241500016	3_NTT1_cutoff_0.02_peak_12219	68.2	276	1	0.25	4	285193	NM_001033575	NM_001033575	DUSP28	2.39232	-2	UD
chr20	61273473	61274050	1_NT1_cutoff_0.02_peak_16983	37.1	148	1	0.25	4	28231	NM_016354	NM_016354	SLCO4A1	1.32294	-2	UD
chr3	52007594	52008348	1_NT1_cutoff_0.02_peak_18508	58.7	231	1	0.25	4	84836	NM_032750	NM_032750	ABHD14B	1.13248	-2	ND
chr17	48171674	48172107	1_NT1_cutoff_0.02_peak_11587	13.8	56	1	0.25	4	5164	NM_002611	NM_001199898	PDK2	0.949752	-2	ND
chr8	96280842	96282033	1_NT1_cutoff_0.02_peak_24722	71.6	286	1	0.25	4	157657	NM_177965	NM_177965	C8orf37	0.746881	-2	ND
chr11	60691596	60692127	1_NT1_cutoff_0.02_peak_4673	16.4	66	1	0.25	4	54972	NM_017870	NM_017870	TMEM132A	0.646501	-2	ND
chr4	39045998	39046765	1_NT1_cutoff_0.02_peak_19709	15.5	61	1	0.25	4	51088	NM_015990	NM_001171654	KLHL5	0.644812	-2	ND
chr15	80352887	80353069	1_NT1_cutoff_0.02_peak_9001	4.3	17	1	0.25	4	54469	NM_019006	NM_001242914	ZFAND6	0.596891	-2	ND
chr20	33759756	33760033	1_NT1_cutoff_0.02_peak_16574	9.5	38	1	0.25	4	10544	NM_006404	NM_006404	PROCR	0.550456	-2	ND
chr11	65189627	65191834	3_NTT1_cutoff_0.02_peak_3689	704.3	2775	1	0.25	4	283131	NR_002802	NR_131012	NEAT1	0.494065	-2	ND
chr3	69134982	69135668	1_NT1_cutoff_0.02_peak_18660	17.3	70	1	0.25	4	10550	NM_006407	NM_006407	ARL6IP5	0.439824	-2	ND
chr6	34204367	34204784	3_NTT1_cutoff_0.02_peak_16373	48.3	191	1	0.25	4	3159	NM_002131	NM_001319078	HMGA1	0.385053	-2	ND
chr19	12886006	12886511	1_NT1_cutoff_0.02_peak_13332	22.4	90	1	0.25	4	29911	NM_013312	NM_013312	HOOK2	0.374994	-2	ND
chr6_mann_hap4	4263120	4263405	1_NT1_cutoff_0.02_peak_22828	4.3	17	1	0.25	4	6891	NM_000544	NM_000544	TAP2	0.275463	-2	ND
chr16	2517653	2518336	1_NT1_cutoff_0.02_peak_9416	32.8	129	1	0.25	4	729652	NR_135198	NR_135198	LOC729652	0.260315	-2	ND
chr7	51384326	51384568	1_NT1_cutoff_0.02_peak_23398	8.6	35	1	0.25	4	23242	NM_015198	NM_001287438	COBL	0.231191	-2	ND
chr15	77363410	77363586	3_NTT1_cutoff_0.02_peak_6799	16.4	66	1	0.25	4	10099	NM_005724	NM_005724	TSPAN3	0.217836	-2	ND
chr2	102759130	102759374	1_NT1_cutoff_0.02_peak_15334	12.9	51	1	0.25	4	3554	NM_000877	NM_000877	IL1R1	0.0498964	-2	ND
chr6	147829517	147829937	1_NT1_cutoff_0.02_peak_22556	14.7	59	1	0.25	4	389432	NM_001030060	NM_001030060	SAMD5	0.0270682	-2	ND
chrX	9982780	9982965	1_NT1_cutoff_0.02_peak_26382	8.6	34	1	0.25	4	55841	NM_015691	NM_015691	WWC3	-0.0384741	-2	ND
chr4	78977850	78979432	1_NT1_cutoff_0.02_peak_19894	54.4	217	1	0.25	4	80144	NM_020875	NM_025074	FRAS1	-0.142199	-2	ND
chr21	34602078	34602702	1_NT1_cutoff_0.02_peak_17117	20.7	83	1	0.25	4	3455	NM_000874	NM_000874	IFNAR2	-0.190239	-2	ND
chr6	35695235	35696868	1_NT1_cutoff_0.02_peak_21944	94.9	384	1	0.25	4	2289	NM_004117	NM_001145775	FKBP5	-0.247053	-2	ND
chr20	1875419	1875776	1_NT1_cutoff_0.02_peak_16264	6.9	28	1	0.25	4	140885	NM_080792	NM_080792	SIRPA	-0.327805	-2	ND
chr15	34330727	34331455	3_NTT1_cutoff_0.02_peak_6385	76.8	307	1	0.25	4	57099	NM_020371	NM_020371	AVEN	-0.419348	-2	ND
chr17	40687722	40689544	1_NT1_cutoff_0.02_peak_11320	94.9	379	1	0.25	4	4669	NM_000263	NM_000263	NAGLU	-0.501986	-2	ND
chr2	87754920	87755747	1_NT1_cutoff_0.02_peak_15258	25.9	104	1	0.25	4	112597	NR_024204	NR_146461	CYTOR	-0.587419	-2	ND
chr8	28351391	28351919	1_NT1_cutoff_0.02_peak_24448	26.8	109	1	0.25	4	7976	NM_017412	NM_145866	FZD3	-0.674362	-2	ND
chr16	2260037	2263139	1_NT1_cutoff_0.02_peak_9390	99.3	397	1	0.25	4	283870	NM_182563	NM_182563	BRICD5	-0.722667	-2	ND
chr15	101457638	101460333	1_NT1_cutoff_0.02_peak_9244	84.6	343	1	0.25	4	79705	NM_024652	NM_024652	LRRK1	-0.807966	-2	ND
chr4	129730759	129731469	1_NT1_cutoff_0.02_peak_20104	19.9	79	1	0.25	4	79960	NM_024900	NM_001287440	JADE1	-0.861948	-2	ND
chr22	50699450	50700224	1_NT1_cutoff_0.02_peak_18039	25	99	1	0.25	4	6300	NM_002969	NM_002969	MAPK12	-0.974996	-2	ND
chr9	35689760	35690006	3_NTT1_cutoff_0.02_peak_18790	39.7	161	1	0.25	4	7169	NM_003289	NM_001301226	TPM2	-1.16042	-2	ND
chr1	94147341	94147518	3_NTT1_cutoff_0.02_peak_1102	41.4	164	1	0.25	4	8412	NM_003567	NM_003567	BCAR3	-1.16591	-2	ND
chr12	121734193	121734888	1_NT1_cutoff_0.02_peak_6973	32.8	130	1	0.25	4	10645	NM_006549	NM_001270485	CAMKK2	-1.21842	-2	DD
chr7	5568387	5570715	3_NTT1_cutoff_0.02_peak_17092	1036.6	4094	1	0.25	4	60	NM_001101	NM_001101	ACTB	-1.2592	-2	DD
chr11	64808218	64809014	1_NT1_cutoff_0.02_peak_4863	19.9	79	1	0.25	4	29901	NM_013299	NM_013299	SAC3D1	-1.26699	-2	DD
chr3	124931009	124931834	1_NT1_cutoff_0.02_peak_18825	34.5	136	1	0.25	4	84561	NM_024628	NM_024628	SLC12A8	-1.28618	-2	DD
chr10	43903668	43904265	3_NTT1_cutoff_0.02_peak_2677	63	248	1	0.25	4	3185	NM_004966	NM_001098205	HNRNPF	-1.28932	-2	DD
chr18	24236100	24237384	1_NT1_cutoff_0.02_peak_12453	48.3	196	1	0.25	4	284252	NM_198991	NM_001258222	KCTD1	-1.39824	-2	DD
chr12	58158298	58161288	1_NT1_cutoff_0.02_peak_6400	95.8	390	1	0.25	4	1594	NM_000785	NM_000785	CYP27B1	-1.45261	-2	DD
chr2	161349236	161349562	1_NT1_cutoff_0.02_peak_15592	12.9	51	1	0.25	4	5937	NM_002897	NM_002897	RBMS1	-1.56762	-2	DD
chr2	161350189	161350546	1_NT1_cutoff_0.02_peak_15594	6.9	28	1	0.25	4	5937	NM_002897	NM_016836	RBMS1	-1.56762	-2	DD
chr16	56659456	56660131	3_NTT1_cutoff_0.02_peak_7603	210.6	856	1	0.25	4	4493	NM_175617	NM_175617	MT1E	-1.81959	-2	DD
chr1	233463396	233463692	1_NT1_cutoff_0.02_peak_2865	35.4	142	1	0.25	4	84451	NM_032435	NM_032435	MAP3K21	-2.05344	-2	DD
chr2	242498033	242498468	1_NT1_cutoff_0.02_peak_16216	15.5	61	1	0.25	4	666	NM_032515	NM_032515	BOK	-2.20905	-2	DD
chr5	1523834	1524485	1_NT1_cutoff_0.02_peak_20329	21.6	87	1	0.25	4	79888	NM_024830	NM_024830	LPCAT1	-2.32902	-2	DD
chr11	121970976	121971350	1_NT1_cutoff_0.02_peak_5465	11.2	45	1	0.25	4	399959	NR_024430	NR_137176	MIR100HG	-2.5615	-2	DD
chr10	134210406	134211152	1_NT1_cutoff_0.02_peak_4099	20.7	83	1	0.25	4	170394	NM_138499	NM_001098637	PWWP2B	-2.6845	-2	DD
chr6	151646663	151646866	1_NT1_cutoff_0.02_peak_22579	3.5	14	1	0.25	4	9590	NM_005100	NM_144497	AKAP12	-2.71555	-2	DD
chr17	77751374	77752187	1_NT1_cutoff_0.02_peak_12076	22.4	89	1	0.25	4	84733	NM_005189	NM_032647	CBX2	-2.79008	-2	DD
chr6	41605525	41606293	1_NT1_cutoff_0.02_peak_22005	14.7	59	1	0.25	4	4188	NM_005586	NM_001300806	MDFI	-2.96857	-2	DD
chr15	80987191	80987879	1_NT1_cutoff_0.02_peak_9003	29.3	118	1	0.25	4	58489	NM_021214	NM_021214	ABHD17C	-3.09299	-2	DD
chr11	61584568	61584776	1_NT1_cutoff_0.02_peak_4686	6.9	27	1	0.26	3.84615	3992	NM_013402	NM_013402	FADS1	1.17655	-1.94342	ND
chr6	27798282	27799674	1_NT1_cutoff_0.02_peak_21804	199.4	776	1	0.26	3.84615	8362	NM_003541	NM_003541	HIST1H4K	1.0794	-1.94342	ND
chr7	89840815	89841272	1_NT1_cutoff_0.02_peak_23638	20.7	79	1	0.26	3.84615	261729	NM_152999	NM_152999	STEAP2	1.03847	-1.94342	ND
chr8	21906456	21906812	1_NT1_cutoff_0.02_peak_24376	12.9	49	1	0.26	3.84615	2039	NM_001978	NM_001323382	DMTN	1.00342	-1.94342	ND
chrX	107681597	107682106	1_NT1_cutoff_0.02_peak_26768	12.1	46	1	0.26	3.84615	1288	NM_001847	NM_001287758	COL4A6	0.855502	-1.94342	ND
chr22	42466616	42467220	1_NT1_cutoff_0.02_peak_17895	22.4	87	1	0.26	3.84615	4668	NM_000262	NM_000262	NAGA	0.835076	-1.94342	ND
chr12	16500479	16500795	3_NTT1_cutoff_0.02_peak_4329	52.6	200	1	0.26	3.84615	4257	NM_020300	NR_048545	MGST1	0.330776	-1.94342	ND
chr14	24605001	24605219	1_NT1_cutoff_0.02_peak_7788	9.5	36	1	0.26	3.84615	5720	NM_006263	NM_001281528	PSME1	0.312066	-1.94342	ND
chr6	137365224	137365558	1_NT1_cutoff_0.02_peak_22503	12.1	47	1	0.26	3.84615	53832	NM_014432	NM_001278722	IL20RA	0.295456	-1.94342	ND
chr21	46293792	46295153	1_NT1_cutoff_0.02_peak_17311	87.2	337	1	0.26	3.84615	754	NM_004339	NR_104597	PTTG1IP	0.126324	-1.94342	ND
chr11	125494652	125494847	1_NT1_cutoff_0.02_peak_5510	6	23	1	0.26	3.84615	1111	NM_001274	NM_001244846	CHEK1	-0.175978	-1.94342	ND
chr5	179498564	179499211	1_NT1_cutoff_0.02_peak_21515	39.7	154	1	0.26	3.84615	55819	NM_018434	NM_001280801	RNF130	-0.188313	-1.94342	ND
chr21	33785399	33785790	1_NT1_cutoff_0.02_peak_17110	14.7	57	1	0.26	3.84615	59271	NM_058187	NM_001286556	EVA1C	-0.22605	-1.94342	ND
chr1	121260597	121261618	1_NT1_cutoff_0.02_peak_1568	40.6	156	1	0.26	3.84615	647121	NR_003955	NR_003955	EMBP1	-0.286523	-1.94342	ND
chr12	29301957	29302455	1_NT1_cutoff_0.02_peak_5887	9.5	36	1	0.26	3.84615	55711	NM_018099	NM_001271783	FAR2	-0.31034	-1.94342	ND
chr1	89989952	89990686	1_NT1_cutoff_0.02_peak_1324	36.2	141	1	0.26	3.84615	23507	NM_015350	NM_001134476	LRRC8B	-0.352453	-1.94342	ND
chr6	5260457	5261441	1_NT1_cutoff_0.02_peak_21593	34.5	132	1	0.26	3.84615	57128	NM_020408	NM_020408	LYRM4	-0.359987	-1.94342	ND
chr1	32041834	32042603	1_NT1_cutoff_0.02_peak_633	28.5	110	1	0.26	3.84615	64129	NM_022164	NM_022164	TINAGL1	-0.3774	-1.94342	ND
chr7	138719854	138721116	1_NT1_cutoff_0.02_peak_24118	42.3	164	1	0.26	3.84615	92092	NM_080660	NM_080660	ZC3HAV1L	-0.42414	-1.94342	ND
chr15	99191369	99192047	1_NT1_cutoff_0.02_peak_9199	15.5	59	1	0.26	3.84615	3480	NM_000875	NM_001291858	IGF1R	-0.43109	-1.94342	ND
chr3	52001451	52002552	1_NT1_cutoff_0.02_peak_18507	36.2	138	1	0.26	3.84615	57060	NM_020418	NM_033008	PCBP4	-0.463079	-1.94342	ND
chr6	89855572	89856742	1_NT1_cutoff_0.02_peak_22321	58.7	230	1	0.26	3.84615	135293	NM_001010853	NM_001010853	PM20D2	-0.566925	-1.94342	ND
chr12	131356133	131356305	3_NTT1_cutoff_0.02_peak_5139	34.5	132	1	0.26	3.84615	5901	NM_006325	NM_001300796	RAN	-0.578244	-1.94342	ND
chr1	20126030	20126518	1_NT1_cutoff_0.02_peak_377	27.6	105	1	0.26	3.84615	255104	NM_181719	NM_181719	TMCO4	-0.660708	-1.94342	ND
chr8	127568688	127570796	1_NT1_cutoff_0.02_peak_24922	105.3	403	1	0.26	3.84615	157638	NM_174911	NM_174911	FAM84B	-0.9361	-1.94342	ND
chr19	1651781	1652288	1_NT1_cutoff_0.02_peak_12822	22.4	87	1	0.26	3.84615	6929	NM_003200	NM_003200	TCF3	-1.23544	-1.94342	DD
chr2	113403207	113404030	3_NTT1_cutoff_0.02_peak_11614	298.6	1137	1	0.26	3.84615	6574	NM_005415	NM_005415	SLC20A1	-1.24781	-1.94342	DD
chrX	3631406	3631915	1_NT1_cutoff_0.02_peak_26371	18.1	69	1	0.26	3.84615	5613	NM_005044	NM_005044	PRKX	-1.2612	-1.94342	DD
chr3	179370411	179371031	1_NT1_cutoff_0.02_peak_19251	20.7	81	1	0.26	3.84615	8975	NM_003940	NM_003940	USP13	-1.26303	-1.94342	DD
chr1	26856067	26856442	1_NT1_cutoff_0.02_peak_505	16.4	62	1	0.26	3.84615	6195	NM_002953	NM_002953	RPS6KA1	-1.30385	-1.94342	DD
chr3	168864006	168864532	1_NT1_cutoff_0.02_peak_19149	20.7	81	1	0.26	3.84615	2122	NM_004991	NM_001105078	MECOM	-1.43116	-1.94342	DD
chr14	50154753	50155057	1_NT1_cutoff_0.02_peak_7910	12.1	47	1	0.26	3.84615	5427	NM_002692	NM_001348384	POLE2	-1.67319	-1.94342	DD
chr19	7660709	7660939	1_NT1_cutoff_0.02_peak_13107	7.8	30	1	0.26	3.84615	57662	NM_020902	NM_001080429	CAMSAP3	-1.73022	-1.94342	DD
chr16	73091561	73092010	1_NT1_cutoff_0.02_peak_10201	15.5	60	1	0.26	3.84615	463	NM_006885	NM_001164766	ZFHX3	-1.73471	-1.94342	DD
chr10	49813021	49813244	1_NT1_cutoff_0.02_peak_3400	6	23	1	0.26	3.84615	58504	NM_021226	NR_144645	ARHGAP22	-1.73697	-1.94342	DD
chr16	14396003	14396274	1_NT1_cutoff_0.02_peak_9589	9.5	37	1	0.26	3.84615	100129781	NR_132983	NR_132983	MIR193BHG	-1.91938	-1.94342	DD
chr12	13044366	13044671	3_NTT1_cutoff_0.02_peak_4316	44	168	1	0.26	3.84615	9052	NM_003979	NM_003979	GPRC5A	-1.92138	-1.94342	DD
chrX	153629098	153630792	3_NTT1_cutoff_0.02_peak_19831	161.4	627	1	0.26	3.84615	26778	NR_000011	NR_000011	SNORA70	-2.114	-1.94342	DD
chr3	122512462	122512761	3_NTT1_cutoff_0.02_peak_14042	22.4	85	1	0.26	3.84615	79663	NM_024610	NM_024610	HSPBAP1	-2.44948	-1.94342	DD
chr3	39452372	39458260	1_NT1_cutoff_0.02_peak_18277	281.4	1067	1	0.26	3.84615	6044	NR_002324	NR_002324	SNORA62	-2.73094	-1.94342	DD
chr12	124017802	124017950	1_NT1_cutoff_0.02_peak_7056	5.2	20	1	0.26	3.84615	353116	NM_178314	NM_178314	RILPL1	-4.14549	-1.94342	DD
chr17	6347056	6347917	1_NT1_cutoff_0.02_peak_10593	22.4	84	1	0.27	3.7037	54478	NM_019013	NM_001195228	PIMREG	1.85694	-1.88897	UD
chr16	30134596	30134894	1_NT1_cutoff_0.02_peak_9794	10.4	39	1	0.27	3.7037	5595	NM_002746	NM_002746	MAPK3	0.776767	-1.88897	ND
chr1	11796111	11797182	1_NT1_cutoff_0.02_peak_254	63.9	236	1	0.27	3.7037	57085	NM_020350	NM_020350	AGTRAP	0.763816	-1.88897	ND
chr2	208489870	208490258	3_NTT1_cutoff_0.02_peak_12052	44	162	1	0.27	3.7037	151194	NM_145280	NM_001330135	METTL21A	0.724109	-1.88897	ND
chr3	124605682	124606470	1_NT1_cutoff_0.02_peak_18824	37.1	135	1	0.27	3.7037	3693	NM_002213	NM_002213	ITGB5	0.550258	-1.88897	ND
chr6	150209875	150210353	1_NT1_cutoff_0.02_peak_22571	12.9	48	1	0.27	3.7037	100652739	NR_045126	NR_045127	RAET1E-AS1	0.504145	-1.88897	ND
chr1	205473768	205474029	1_NT1_cutoff_0.02_peak_2545	10.4	38	1	0.27	3.7037	5129	NM_002596	NM_212502	CDK18	0.36257	-1.88897	ND
chr6	52535605	52536153	1_NT1_cutoff_0.02_peak_22150	23.3	87	1	0.27	3.7037	28978	NM_014051	NM_014051	TMEM14A	0.350655	-1.88897	ND
chr3	111578052	111578331	1_NT1_cutoff_0.02_peak_18748	15.5	57	1	0.27	3.7037	90102	NM_145753	NM_001134438	PHLDB2	0.342063	-1.88897	ND
chr12	16505354	16505812	1_NT1_cutoff_0.02_peak_5813	9.5	35	1	0.27	3.7037	4257	NM_020300	NM_145764	MGST1	0.330776	-1.88897	ND
chr8	144635485	144636267	1_NT1_cutoff_0.02_peak_25092	29.3	109	1	0.27	3.7037	79792	NM_024736	NM_001166237	GSDMD	0.314565	-1.88897	ND
chr18	71959014	71959288	1_NT1_cutoff_0.02_peak_12617	9.5	35	1	0.27	3.7037	1528	NM_001914	NM_001190807	CYB5A	0.276677	-1.88897	ND
chr15	49462060	49463057	1_NT1_cutoff_0.02_peak_8691	50.1	188	1	0.27	3.7037	2585	NM_002044	NM_002044	GALK2	0.271853	-1.88897	ND
chr12	105352456	105352642	1_NT1_cutoff_0.02_peak_6784	6.9	26	1	0.27	3.7037	84102	NM_032148	NM_001352169	SLC41A2	0.250587	-1.88897	ND
chr1	33004846	33005185	1_NT1_cutoff_0.02_peak_665	10.4	38	1	0.27	3.7037	653121	NM_144621	NM_001040441	ZBTB8A	0.102082	-1.88897	ND
chr1	9188891	9189332	1_NT1_cutoff_0.02_peak_212	25	93	1	0.27	3.7037	80045	NM_024980	NM_024980	GPR157	0.0777223	-1.88897	ND
chr19	3062266	3062716	1_NT1_cutoff_0.02_peak_12934	32.8	120	1	0.27	3.7037	166	NM_001130	NM_001130	AES	0.0507057	-1.88897	ND
chr21	46237868	46238260	1_NT1_cutoff_0.02_peak_17308	20.7	78	1	0.27	3.7037	6612	NM_006936	NM_001286416	SUMO3	0.0210909	-1.88897	ND
chr17	8191710	8192417	3_NTT1_cutoff_0.02_peak_8162	41.4	151	1	0.27	3.7037	29098	NM_016492	NM_001177802	RANGRF	-0.0141145	-1.88897	ND
chr1	167188939	167189916	1_NT1_cutoff_0.02_peak_2222	61.3	226	1	0.27	3.7037	5451	NM_002697	NM_001198786	POU2F1	-0.164119	-1.88897	ND
chr22	47133977	47134240	1_NT1_cutoff_0.02_peak_18004	6	22	1	0.27	3.7037	64781	NM_022766	NM_022766	CERK	-0.173737	-1.88897	ND
chr16	89988079	89989194	1_NT1_cutoff_0.02_peak_10402	51.8	191	1	0.27	3.7037	10381	NM_006086	NM_001197181	TUBB3	-0.282341	-1.88897	ND
chr3	15900952	15902455	1_NT1_cutoff_0.02_peak_18193	43.2	158	1	0.27	3.7037	23243	NM_015199	NM_001349279	ANKRD28	-0.313923	-1.88897	ND
chr4	99579605	99579781	1_NT1_cutoff_0.02_peak_19978	10.4	38	1	0.27	3.7037	10098	NM_005723	NM_005723	TSPAN5	-0.425926	-1.88897	ND
chr3	127317198	127317525	3_NTT1_cutoff_0.02_peak_14057	24.2	91	1	0.27	3.7037	4171	NM_004526	NM_004526	MCM2	-0.448461	-1.88897	ND
chr7	156803218	156803715	1_NT1_cutoff_0.02_peak_24254	15.5	58	1	0.27	3.7037	645249	NR_038835	NR_038835	MNX1-AS1	-0.520007	-1.88897	ND
chr7	32981987	32982909	1_NT1_cutoff_0.02_peak_23251	34.5	126	1	0.27	3.7037	441212	NM_001039754	NR_003500	RP9P	-0.579013	-1.88897	ND
chr7	150756181	150757981	1_NT1_cutoff_0.02_peak_24209	70.8	262	1	0.27	3.7037	6522	NM_003040	NM_003040	SLC4A2	-0.619396	-1.88897	ND
chr19	55972599	55973120	1_NT1_cutoff_0.02_peak_14455	27.6	102	1	0.27	3.7037	79763	NM_024710	NM_001136202	ISOC2	-0.674214	-1.88897	ND
chr1	44446346	44446811	1_NT1_cutoff_0.02_peak_978	11.2	42	1	0.27	3.7037	8704	NM_003780	NM_001005417	B4GALT2	-0.752091	-1.88897	ND
chr2	203499517	203500086	1_NT1_cutoff_0.02_peak_15905	29.3	109	1	0.27	3.7037	150864	NM_173511	NM_173511	FAM117B	-0.76356	-1.88897	ND
chr17	17727109	17727371	1_NT1_cutoff_0.02_peak_10815	8.6	32	1	0.27	3.7037	6720	NM_004176	NM_001321096	SREBF1	-1.13044	-1.88897	ND
chr12	3068513	3068703	3_NTT1_cutoff_0.02_peak_4225	19.9	74	1	0.27	3.7037	7004	NM_003213	NM_201441	TEAD4	-1.13702	-1.88897	ND
chr18	47016779	47017059	3_NTT1_cutoff_0.02_peak_9500	19.9	74	1	0.27	3.7037	26791	NR_002571	NR_002571	SNORD58A	-1.50423	-1.88897	DD
chr3	50649035	50649381	1_NT1_cutoff_0.02_peak_18481	12.1	44	1	0.27	3.7037	1154	NM_013324	NM_013324	CISH	-1.80996	-1.88897	DD
chr5	129240000	129240306	1_NT1_cutoff_0.02_peak_20831	10.4	38	1	0.27	3.7037	337876	NM_175856	NM_175856	CHSY3	-1.81536	-1.88897	DD
chr2	97534030	97535280	1_NT1_cutoff_0.02_peak_15300	49.2	185	1	0.27	3.7037	54910	NM_017789	NM_017789	SEMA4C	-1.85415	-1.88897	DD
chr13	74708348	74708877	1_NT1_cutoff_0.02_peak_7412	13.8	51	1	0.27	3.7037	11278	NM_007249	NM_007249	KLF12	-1.87072	-1.88897	DD
chr16	14396441	14396678	1_NT1_cutoff_0.02_peak_9590	6	22	1	0.27	3.7037	100129781	NR_132983	NR_132984	MIR193BHG	-1.91938	-1.88897	DD
chr1	901192	902715	1_NT1_cutoff_0.02_peak_12	92.4	346	1	0.27	3.7037	84069	NM_032129	NM_032129	PLEKHN1	-1.94548	-1.88897	DD
chr1	231004160	231004598	1_NT1_cutoff_0.02_peak_2842	13.8	51	1	0.27	3.7037	84886	NM_032800	NM_032800	C1orf198	-2.04134	-1.88897	DD
chr19	14142508	14142798	1_NT1_cutoff_0.02_peak_13406	12.1	45	1	0.27	3.7037	9466	NM_004843	NM_004843	IL27RA	-2.17391	-1.88897	DD
chr6	12290297	12290445	1_NT1_cutoff_0.02_peak_21656	5.2	19	1	0.27	3.7037	1906	NM_001955	NM_001168319	EDN1	-2.30622	-1.88897	DD
chr12	4382809	4383511	1_NT1_cutoff_0.02_peak_5599	29.3	107	1	0.27	3.7037	894	NM_001759	NM_001759	CCND2	-2.32232	-1.88897	DD
chr3	32433124	32433557	1_NT1_cutoff_0.02_peak_18236	13.8	52	1	0.27	3.7037	112616	NM_138410	NM_181472	CMTM7	-3.02082	-1.88897	DD
chr13	80915144	80915743	3_NTT1_cutoff_0.02_peak_5494	69.9	260	1	0.27	3.7037	10253	NM_005842	NM_005842	SPRY2	-3.57	-1.88897	DD
chr8	48650431	48651134	3_NTT1_cutoff_0.02_peak_18149	167.4	614	1	0.27	3.7037	1052	NM_005195	NM_005195	CEBPD	-3.82292	-1.88897	DD
chr4	56502291	56502547	1_NT1_cutoff_0.02_peak_19785	10.4	37	1	0.28	3.57143	10874	NM_006681	NM_006681	NMU	1.31252	-1.8365	UD
chr17	78234619	78234810	3_NTT1_cutoff_0.02_peak_9179	24.2	85	1	0.28	3.57143	57674	NM_020914	NM_001256071	RNF213	1.05347	-1.8365	ND
chr22	38071039	38073578	1_NT1_cutoff_0.02_peak_17702	59.6	216	1	0.28	3.57143	3956	NM_002305	NM_002305	LGALS1	0.878382	-1.8365	ND
chr7	134143669	134144198	1_NT1_cutoff_0.02_peak_24096	14.7	53	1	0.28	3.57143	231	NM_001628	NM_001628	AKR1B1	0.80375	-1.8365	ND
chr10	25305465	25306221	3_NTT1_cutoff_0.02_peak_2596	112.2	405	1	0.28	3.57143	79896	NM_024838	NM_024838	THNSL1	0.80128	-1.8365	ND
chr19	41724980	41725388	1_NT1_cutoff_0.02_peak_13918	21.6	76	1	0.28	3.57143	558	NM_001699	NM_021913	AXL	0.770893	-1.8365	ND
chr6	143381324	143381597	3_NTT1_cutoff_0.02_peak_16820	21.6	77	1	0.28	3.57143	51390	NM_016108	NM_001286589	AIG1	0.652873	-1.8365	ND
chr20	39656837	39657262	1_NT1_cutoff_0.02_peak_16725	43.2	152	1	0.28	3.57143	7150	NM_003286	NM_003286	TOP1	0.550846	-1.8365	ND
chr7	140372576	140373578	1_NT1_cutoff_0.02_peak_24135	55.2	195	1	0.28	3.57143	90956	NM_052853	NM_052853	ADCK2	0.272597	-1.8365	ND
chr9	133320236	133320712	1_NT1_cutoff_0.02_peak_26152	17.3	61	1	0.28	3.57143	445	NM_000050	NM_000050	ASS1	0.259448	-1.8365	ND
chr11	64002375	64002586	1_NT1_cutoff_0.02_peak_4813	8.6	31	1	0.28	3.57143	7423	NM_003377	NM_003377	VEGFB	0.252794	-1.8365	ND
chr17	80186771	80187258	3_NTT1_cutoff_0.02_peak_9269	166.6	603	1	0.28	3.57143	9123	NM_004207	NM_004207	SLC16A3	0.124737	-1.8365	ND
chr21	27106226	27106451	1_NT1_cutoff_0.02_peak_17072	7.8	28	1	0.28	3.57143	2551	NM_002040	NM_001197297	GABPA	-0.0513012	-1.8365	ND
chr11	74109316	74110105	1_NT1_cutoff_0.02_peak_5170	33.7	119	1	0.28	3.57143	283209	NM_173582	NM_173582	PGM2L1	-0.0644167	-1.8365	ND
chr19	48829068	48829365	1_NT1_cutoff_0.02_peak_14214	8.6	31	1	0.28	3.57143	2014	NM_001425	NM_001313905	EMP3	-0.0816792	-1.8365	ND
chr2	30370537	30370711	1_NT1_cutoff_0.02_peak_14857	6.9	25	1	0.28	3.57143	51646	NM_016061	NM_001127401	YPEL5	-0.0907553	-1.8365	ND
chr11	62618507	62620263	3_NTT1_cutoff_0.02_peak_3607	201.1	720	1	0.28	3.57143	9304	NR_000008	NR_000008	SNORD22	-0.143341	-1.8365	ND
chr19	11308033	11308339	1_NT1_cutoff_0.02_peak_13269	16.4	58	1	0.28	3.57143	25959	NM_015493	NM_001136191	KANK2	-0.239338	-1.8365	ND
chr1	27692659	27693040	1_NT1_cutoff_0.02_peak_552	11.2	40	1	0.28	3.57143	9064	NM_004672	NM_001297609	MAP3K6	-0.248326	-1.8365	ND
chr5	172662050	172662318	1_NT1_cutoff_0.02_peak_21340	8.6	31	1	0.28	3.57143	1482	NM_004387	NM_001166176	NKX2-5	-0.300924	-1.8365	ND
chr15	43885637	43886267	1_NT1_cutoff_0.02_peak_8629	22.4	79	1	0.28	3.57143	1159	NM_020990	NR_135752	CKMT1B	-0.339466	-1.8365	ND
chr5	140018886	140019347	1_NT1_cutoff_0.02_peak_21056	31.9	113	1	0.28	3.57143	55374	NM_018502	NM_001300982	TMCO6	-0.36945	-1.8365	ND
chr15	75135345	75135593	3_NTT1_cutoff_0.02_peak_6774	40.6	143	1	0.28	3.57143	25989	NM_001099436	NM_001099436	ULK3	-0.465307	-1.8365	ND
chr18	712333	712768	3_NTT1_cutoff_0.02_peak_9338	42.3	152	1	0.28	3.57143	55556	NM_017512	NM_017512	ENOSF1	-0.485	-1.8365	ND
chr11	63438583	63439056	3_NTT1_cutoff_0.02_peak_3622	38.8	137	1	0.28	3.57143	25923	NM_015459	NM_015459	ATL3	-0.601847	-1.8365	ND
chr8	144653472	144657255	1_NT1_cutoff_0.02_peak_25099	244.3	883	1	0.28	3.57143	642475	NM_001100878	NM_001100878	MROH6	-0.613355	-1.8365	ND
chr4	26320883	26321194	1_NT1_cutoff_0.02_peak_19685	14.7	53	1	0.28	3.57143	3516	NM_005349	NM_005349	RBPJ	-0.624329	-1.8365	ND
chr6	131456314	131457035	1_NT1_cutoff_0.02_peak_22474	40.6	143	1	0.28	3.57143	9465	NM_004842	NM_016377	AKAP7	-0.948775	-1.8365	ND
chr12	39299296	39299512	3_NTT1_cutoff_0.02_peak_4375	16.4	59	1	0.28	3.57143	144402	NM_153634	NM_153634	CPNE8	-1.03616	-1.8365	ND
chr7	30810806	30811120	3_NTT1_cutoff_0.02_peak_17223	28.5	100	1	0.28	3.57143	84182	NM_032222	NM_032222	MINDY4	-1.06774	-1.8365	ND
chr3	195622050	195623391	1_NT1_cutoff_0.02_peak_19435	32.8	119	1	0.28	3.57143	10188	NM_005781	NM_001010938	TNK2	-1.1016	-1.8365	ND
chr7	151329559	151329908	1_NT1_cutoff_0.02_peak_24233	12.9	46	1	0.28	3.57143	51422	NM_016203	NM_001304531	PRKAG2	-1.2001	-1.8365	DD
chr12	122064154	122064911	1_NT1_cutoff_0.02_peak_6983	36.2	131	1	0.28	3.57143	84876	NM_032790	NM_032790	ORAI1	-1.22201	-1.8365	DD
chr17	36831055	36831223	3_NTT1_cutoff_0.02_peak_8518	26.8	94	1	0.28	3.57143	100170841	NM_001130677	NM_001130677	EPOP	-1.33015	-1.8365	DD
chr19	6765790	6767608	1_NT1_cutoff_0.02_peak_13092	151.9	544	1	0.28	3.57143	10045	NM_005490	NM_005490	SH2D3A	-1.49173	-1.8365	DD
chr9	71650567	71651216	1_NT1_cutoff_0.02_peak_25628	37.1	131	1	0.28	3.57143	2395	NM_000144	NM_000144	FXN	-1.51345	-1.8365	DD
chr19	7968075	7968639	3_NTT1_cutoff_0.02_peak_9912	109.6	394	1	0.28	3.57143	5609	NM_145185	NM_001297556	MAP2K7	-1.63282	-1.8365	DD
chr20	61426566	61427110	1_NT1_cutoff_0.02_peak_16986	13.8	50	1	0.28	3.57143	55257	NM_018270	NM_018270	MRGBP	-1.77545	-1.8365	DD
chr6	42109771	42110569	1_NT1_cutoff_0.02_peak_22038	25.9	92	1	0.28	3.57143	647024	NM_001164446	NM_001164446	C6orf132	-2.06815	-1.8365	DD
chr8	94928627	94929921	1_NT1_cutoff_0.02_peak_24707	52.6	191	1	0.28	3.57143	54704	NM_018444	NM_001161781	PDP1	-2.20645	-1.8365	DD
chr14	74253190	74254208	1_NT1_cutoff_0.02_peak_8152	36.2	131	1	0.28	3.57143	91748	NM_194278	NM_001043318	ELMSAN1	-2.38127	-1.8365	DD
chr17	13504948	13505328	1_NT1_cutoff_0.02_peak_10750	20.7	75	1	0.28	3.57143	9955	NM_006042	NM_006042	HS3ST3A1	-3.10014	-1.8365	DD
chr13	111213717	111214446	1_NT1_cutoff_0.02_peak_7526	25	88	1	0.28	3.57143	55647	NM_017817	NM_017817	RAB20	-3.30914	-1.8365	DD
chr10	5637630	5638349	1_NT1_cutoff_0.02_peak_3061	13.8	47	1	0.29	3.44828	105376382	NR_134491	NR_134491	LOC105376382	6.55459	-1.78588	UD
chr17	59476740	59477349	1_NT1_cutoff_0.02_peak_11742	18.1	62	1	0.29	3.44828	103689912	NR_125749	NR_125749	TBX2-AS1	2.57247	-1.78588	UD
chr6	46620556	46620828	1_NT1_cutoff_0.02_peak_22137	5.2	18	1	0.29	3.44828	9481	NM_004277	NM_004277	SLC25A27	1.77013	-1.78588	UD
chr2	179343097	179343448	1_NT1_cutoff_0.02_peak_15732	19	65	1	0.29	3.44828	51661	NM_016105	NM_181342	FKBP7	1	-1.78588	ND
chr3	112359802	112360373	3_NTT1_cutoff_0.02_peak_14008	175.2	601	1	0.29	3.44828	151887	NM_199511	NM_199511	CCDC80	0.959278	-1.78588	ND
chrX	71933956	71934144	1_NT1_cutoff_0.02_peak_26681	8.6	30	1	0.29	3.44828	5255	NM_002637	NM_002637	PHKA1	0.80349	-1.78588	ND
chr1	45672187	45672358	1_NT1_cutoff_0.02_peak_1011	6	21	1	0.29	3.44828	57643	NM_020883	NM_020883	ZSWIM5	0.565597	-1.78588	ND
chr22	36424290	36425164	1_NT1_cutoff_0.02_peak_17644	42.3	148	1	0.29	3.44828	23543	NM_014309	NM_001082578	RBFOX2	0.391495	-1.78588	ND
chr6_cox_hap2	4250515	4250691	1_NT1_cutoff_0.02_peak_22745	2.6	9	0.999	0.29	3.44828	6891	NM_000544	NM_018833	TAP2	0.275463	-1.78588	ND
chr10	30024199	30024894	1_NT1_cutoff_0.02_peak_3230	15.5	54	1	0.29	3.44828	6840	NM_003174	NM_003174	SVIL	0.27208	-1.78588	ND
chr4	84256263	84256470	1_NT1_cutoff_0.02_peak_19945	8.6	30	1	0.29	3.44828	10855	NM_006665	NM_006665	HPSE	0.267422	-1.78588	ND
chr10	35417072	35417356	1_NT1_cutoff_0.02_peak_3265	6.9	24	1	0.29	3.44828	1390	NM_001881	NM_181571	CREM	0.158031	-1.78588	ND
chr2	152117892	152118646	1_NT1_cutoff_0.02_peak_15554	32.8	112	1	0.29	3.44828	375287	NM_198557	NM_198557	RBM43	0.0527627	-1.78588	ND
chr18	3603311	3604313	1_NT1_cutoff_0.02_peak_12329	47.5	164	1	0.29	3.44828	84777	NM_032691	NR_119377	DLGAP1-AS2	0.0523388	-1.78588	ND
chr16	67207744	67208589	1_NT1_cutoff_0.02_peak_10018	40.6	138	1	0.29	3.44828	8996	NM_003946	NM_001276311	NOL3	-0.0132237	-1.78588	ND
chr7	2594953	2595257	1_NT1_cutoff_0.02_peak_23038	25	85	1	0.29	3.44828	221927	NM_152743	NM_001350627	BRAT1	-0.0388381	-1.78588	ND
chr4	89978098	89978536	1_NT1_cutoff_0.02_peak_19965	16.4	56	1	0.29	3.44828	10144	NM_014883	NM_014883	FAM13A	-0.271673	-1.78588	ND
chr19	18530134	18530604	1_NT1_cutoff_0.02_peak_13564	26.8	93	1	0.29	3.44828	170463	NM_032627	NM_001009998	SSBP4	-0.321928	-1.78588	ND
chr16	88519636	88519798	1_NT1_cutoff_0.02_peak_10332	5.2	18	1	0.29	3.44828	161882	NM_153813	NM_153813	ZFPM1	-0.475181	-1.78588	ND
chr8	22422320	22423814	1_NT1_cutoff_0.02_peak_24387	46.6	160	1	0.29	3.44828	10174	NM_005775	NM_001018003	SORBS3	-0.490403	-1.78588	ND
chr3	52567567	52568130	1_NT1_cutoff_0.02_peak_18533	26.8	91	1	0.29	3.44828	64943	NM_022908	NM_001134231	NT5DC2	-0.517082	-1.78588	ND
chr6	42419426	42419682	1_NT1_cutoff_0.02_peak_22041	7.8	27	1	0.29	3.44828	55809	NM_018415	NM_001297573	TRERF1	-0.700986	-1.78588	ND
chr1	94713100	94713548	1_NT1_cutoff_0.02_peak_1409	22.4	77	1	0.29	3.44828	9411	NM_004815	NM_001328665	ARHGAP29	-0.717857	-1.78588	ND
chr4	129732679	129733749	3_NTT1_cutoff_0.02_peak_15003	56.1	193	1	0.29	3.44828	79960	NM_024900	NM_001287443	JADE1	-0.861948	-1.78588	ND
chr15	40631887	40632703	1_NT1_cutoff_0.02_peak_8551	15.5	53	1	0.29	3.44828	388115	NM_207380	NM_207380	CCDC9B	-0.876729	-1.78588	ND
chr7	993510	993672	1_NT1_cutoff_0.02_peak_22985	5.2	18	1	0.29	3.44828	11033	NM_006869	NM_006869	ADAP1	-0.88781	-1.78588	ND
chr2	241373990	241374807	1_NT1_cutoff_0.02_peak_16191	21.6	75	1	0.29	3.44828	2817	NM_002081	NM_002081	GPC1	-0.905833	-1.78588	ND
chr9	104248225	104249117	1_NT1_cutoff_0.02_peak_25857	27.6	96	1	0.29	3.44828	84302	NM_032342	NM_001303108	TMEM246	-0.924131	-1.78588	ND
chr3	87039526	87040585	1_NT1_cutoff_0.02_peak_18680	30.2	104	1	0.29	3.44828	389136	NM_016206	NM_016206	VGLL3	-0.953777	-1.78588	ND
chr9	109622862	109625109	1_NT1_cutoff_0.02_peak_25868	58.7	200	1	0.29	3.44828	58499	NM_021224	NM_001347997	ZNF462	-1.04867	-1.78588	ND
chr12	125478041	125478247	3_NTT1_cutoff_0.02_peak_5137	24.2	84	1	0.29	3.44828	140707	NM_080626	NM_080626	BRI3BP	-1.15754	-1.78588	ND
chr22	30818678	30820630	1_NT1_cutoff_0.02_peak_17563	130.3	448	1	0.29	3.44828	51537	NM_016498	NM_016498	MTFP1	-1.16883	-1.78588	ND
chr3	168864989	168865190	1_NT1_cutoff_0.02_peak_19150	6.9	24	1	0.29	3.44828	2122	NM_004991	NM_001164000	MECOM	-1.43116	-1.78588	DD
chr4	75230755	75231183	1_NT1_cutoff_0.02_peak_19850	22.4	78	1	0.29	3.44828	2069	NM_001432	NM_001432	EREG	-1.45943	-1.78588	DD
chr5	72416374	72416608	1_NT1_cutoff_0.02_peak_20646	6.9	24	1	0.29	3.44828	134285	NM_173490	NM_173490	TMEM171	-1.62071	-1.78588	DD
chr1	41445268	41446315	3_NTT1_cutoff_0.02_peak_653	127.7	447	1	0.29	3.44828	1503	NM_001905	NM_001905	CTPS1	-1.62609	-1.78588	DD
chr17	42299283	42299789	1_NT1_cutoff_0.02_peak_11407	16.4	56	1	0.29	3.44828	7343	NM_014233	NR_045058	UBTF	-1.75653	-1.78588	DD
chr18	3449975	3450444	3_NTT1_cutoff_0.02_peak_9358	86.3	298	1	0.29	3.44828	7050	NM_003244	NM_003244	TGIF1	-1.85321	-1.78588	DD
chr2	169103072	169103374	1_NT1_cutoff_0.02_peak_15612	6	21	1	0.29	3.44828	27347	NM_013233	NM_013233	STK39	-1.93959	-1.78588	DD
chr2	220492371	220492669	1_NT1_cutoff_0.02_peak_16058	12.9	44	1	0.29	3.44828	6508	NM_005070	NR_048551	SLC4A3	-2.00699	-1.78588	DD
chr2	9346564	9347452	1_NT1_cutoff_0.02_peak_14606	38	133	1	0.29	3.44828	8853	NM_003887	NM_001135191	ASAP2	-2.06395	-1.78588	DD
chr15	90727411	90728479	1_NT1_cutoff_0.02_peak_9129	32.8	114	1	0.29	3.44828	10509	NM_020210	NM_001324029	SEMA4B	-2.12369	-1.78588	DD
chr1	90286183	90286727	1_NT1_cutoff_0.02_peak_1326	16.4	57	1	0.29	3.44828	55144	NM_018103	NM_001134479	LRRC8D	-2.2148	-1.78588	DD
chr6	10419134	10419674	3_NTT1_cutoff_0.02_peak_16150	83.7	285	1	0.29	3.44828	7020	NM_003220	NM_001042425	TFAP2A	-2.45551	-1.78588	DD
chr1	28285932	28286676	1_NT1_cutoff_0.02_peak_568	35.4	124	1	0.29	3.44828	55113	NM_018053	NM_018053	XKR8	-2.53492	-1.78588	DD
chr17	7478427	7479105	3_NTT1_cutoff_0.02_peak_8110	57.8	202	1	0.29	3.44828	652965	NR_002918	NR_002918	SNORA48	-3.2438	-1.78588	DD
chr3	48229296	48229574	1_NT1_cutoff_0.02_peak_18357	14.7	51	1	0.29	3.44828	993	NM_001789	NM_201567	CDC25A	-3.35147	-1.78588	DD
chr10	74033444	74034000	3_NTT1_cutoff_0.02_peak_2807	355.6	1227	1	0.29	3.44828	54541	NM_019058	NM_019058	DDIT4	-3.42224	-1.78588	DD
chr1	40942797	40943036	1_NT1_cutoff_0.02_peak_874	11.2	37	1	0.3	3.33333	339559	NM_198494	NM_001320178	ZFP69	4.90689	-1.73697	UD
chr6	27775529	27776340	3_NTT1_cutoff_0.02_peak_16293	117.4	388	1	0.3	3.33333	8329	NM_003509	NM_003509	HIST1H2AI	2.48165	-1.73697	UD
chr3	196729800	196730751	1_NT1_cutoff_0.02_peak_19487	35.4	117	1	0.3	3.33333	100507057	NR_038285	NR_038285	MELTF-AS1	2.32465	-1.73697	UD
chr7	141401794	141402052	1_NT1_cutoff_0.02_peak_24140	7.8	26	1	0.3	3.33333	57189	NM_001080392	NM_001080392	KIAA1147	1.18569	-1.73697	ND
chr5	95159503	95159892	1_NT1_cutoff_0.02_peak_20734	10.4	34	1	0.3	3.33333	2745	NM_002064	NM_001118890	GLRX	0.832733	-1.73697	ND
chr4	95678770	95679823	1_NT1_cutoff_0.02_peak_19975	52.6	173	1	0.3	3.33333	658	NM_001203	NM_001203	BMPR1B	0.579609	-1.73697	ND
chr11	1784872	1785569	1_NT1_cutoff_0.02_peak_4243	31.1	104	1	0.3	3.33333	1509	NM_001909	NM_001909	CTSD	0.561688	-1.73697	ND
chr2	1747517	1747935	1_NT1_cutoff_0.02_peak_14586	8.6	29	1	0.3	3.33333	7837	NM_012293	NM_012293	PXDN	0.540712	-1.73697	ND
chr12	102091304	102091571	1_NT1_cutoff_0.02_peak_6753	9.5	32	1	0.3	3.33333	56994	NM_020244	NM_020244	CHPT1	0.535996	-1.73697	ND
chr17	76975876	76976124	1_NT1_cutoff_0.02_peak_12073	8.6	29	1	0.3	3.33333	3959	NM_005567	NM_005567	LGALS3BP	0.500576	-1.73697	ND
chr3	43663799	43664067	1_NT1_cutoff_0.02_peak_18302	11.2	37	1	0.3	3.33333	55129	NM_018075	NM_001204833	ANO10	0.495	-1.73697	ND
chr8	22844781	22844962	1_NT1_cutoff_0.02_peak_24399	8.6	29	1	0.3	3.33333	23221	NM_015178	NM_001160036	RHOBTB2	0.466745	-1.73697	ND
chr16	67312084	67312293	1_NT1_cutoff_0.02_peak_10044	8.6	29	1	0.3	3.33333	25894	NM_015432	NM_001129727	PLEKHG4	0.275634	-1.73697	ND
chr17	18266562	18267166	1_NT1_cutoff_0.02_peak_10834	28.5	95	1	0.3	3.33333	6470	NM_004169	NM_148918	SHMT1	0.243475	-1.73697	ND
chr7	134576163	134576482	1_NT1_cutoff_0.02_peak_24099	19	63	1	0.3	3.33333	800	NM_004342	NM_033140	CALD1	0.100223	-1.73697	ND
chr11	111797421	111797638	1_NT1_cutoff_0.02_peak_5328	6	20	1	0.3	3.33333	85458	NM_033425	NM_001278542	DIXDC1	0.0884688	-1.73697	ND
chr14	92980002	92980329	1_NT1_cutoff_0.02_peak_8277	21.6	73	1	0.3	3.33333	79890	NM_024832	NM_024832	RIN3	0.0782671	-1.73697	ND
chr6	26234956	26235315	3_NTT1_cutoff_0.02_peak_16260	56.1	186	1	0.3	3.33333	3007	NM_005320	NM_005320	HIST1H1D	0	-1.73697	ND
chr3	52008585	52009445	1_NT1_cutoff_0.02_peak_18509	46.6	153	1	0.3	3.33333	100526760	NM_001316331	NM_001316331	ABHD14A-ACY1	0	-1.73697	ND
chr14	102783593	102784034	1_NT1_cutoff_0.02_peak_8342	21.6	72	1	0.3	3.33333	55778	NM_018335	NM_001267827	ZNF839	-0.00380157	-1.73697	ND
chr5	72921487	72922227	1_NT1_cutoff_0.02_peak_20659	38.8	131	1	0.3	3.33333	64283	NM_001080479	NM_001080479	ARHGEF28	-0.127112	-1.73697	ND
chr10	47151256	47151687	1_NT1_cutoff_0.02_peak_3342	21.6	73	1	0.3	3.33333	643650	NR_033957	NR_033957	LINC00842	-0.139217	-1.73697	ND
chr8	131455743	131456313	3_NTT1_cutoff_0.02_peak_18505	68.2	224	1	0.3	3.33333	50807	NM_018482	NM_018482	ASAP1	-0.184787	-1.73697	ND
chr2	220024955	220025640	1_NT1_cutoff_0.02_peak_16028	42.3	139	1	0.3	3.33333	79840	NM_024782	NM_024782	NHEJ1	-0.248127	-1.73697	ND
chr19	33793183	33793888	1_NT1_cutoff_0.02_peak_13672	54.4	180	1	0.3	3.33333	1050	NM_004364	NM_004364	CEBPA	-0.303223	-1.73697	ND
[truncated: 9,121 more rows]

## Sheet: ChIP_TF_UP
chr	Start	End	PeakID	Treatment Tags	Control Tags	Fold DOWN	Fold UP	p-value	Status	Annotation	Nearest PromoterID	Distance to TSS	Entrez ID	Nearest Refseq	Gene name	LOG2FC
[truncated: 2,367 more rows]

[truncated: 1 more sheets: ChIPseq-RNAseq_TF]
